# Supplementary material for: Cell-Based Systems Biology Analysis of Human AS03-Adjuvanted H5N1 Avian Influenza Vaccine Responses: A Phase I Randomized Controlled Trial
Source: PubMed Central journal article supplement (PMC5242433; doi:10.1371/journal.pone.0167488), 2017-01-18
Supplement: pone.0167488.s012.pdf [file pone.0167488.s012.pdf]

S2 Text Manuscript Appendix "Cell-based Systems Biology Analysis of Human AS03-adjuvanted H5N1 Avian Influenza Vaccine Responses: A Phase I Randomized Controlled Trial"  
Version 1.0

November 1, 2016

## Table of Contents

|          |                                                                                      |           |
|----------|--------------------------------------------------------------------------------------|-----------|
| <b>1</b> | <b>Introduction</b>                                                                  | <b>15</b> |
| <b>2</b> | <b>Supplemental methods</b>                                                          | <b>16</b> |
| 2.1      | Selection of study population . . . . .                                              | 16        |
| 2.1.1    | Inclusion criteria . . . . .                                                         | 16        |
| 2.1.2    | Exclusion criteria . . . . .                                                         | 17        |
| 2.2      | Study visit windows . . . . .                                                        | 18        |
| 2.3      | Reactogenicity definitions . . . . .                                                 | 19        |
| 2.4      | Analysis population . . . . .                                                        | 19        |
| 2.5      | Cytokine/chemokine cytometric bead array methods . . . . .                           | 19        |
| 2.6      | RNA-Seq methods . . . . .                                                            | 20        |
| 2.6.1    | RNA-Seq experiment . . . . .                                                         | 20        |
| 2.6.2    | RNA-Seq data preprocessing . . . . .                                                 | 20        |
| 2.6.3    | RNA-Seq statistical analysis . . . . .                                               | 21        |
| 2.7      | Flow cytometric immune cell phenotyping and activation methods . . . . .             | 25        |
| 2.7.1    | Flow cytometric immune cell phenotyping and activation data processing . . . . .     | 25        |
| 2.7.2    | Flow cytometric immune cell activation outlier detection and normalization . . . . . | 25        |
| 2.8      | Software . . . . .                                                                   | 26        |
| <b>3</b> | <b>Supplemental results</b>                                                          | <b>26</b> |
| 3.1      | Safety and immunogenicity results . . . . .                                          | 27        |
| 3.1.1    | Local and systemic reactogenicity . . . . .                                          | 27        |
| 3.1.2    | Adverse events . . . . .                                                             | 27        |

|        |                                                                                                          |    |
|--------|----------------------------------------------------------------------------------------------------------|----|
| 3.2    | Cytokine/chemokine cytometric bead array results . . . . .                                               | 27 |
| 3.3    | RNA-Seq results . . . . .                                                                                | 27 |
| 3.3.1  | Reference alignment statistics . . . . .                                                                 | 27 |
| 3.3.2  | Impact of TMM normalization . . . . .                                                                    | 28 |
| 3.3.3  | Global gene expression patterns, confounding effects, and outlying samples . . . . .                     | 29 |
| 3.3.4  | Multiple time points to measure baseline expression . . . . .                                            | 30 |
| 3.3.5  | Adjustment of global GC content bias . . . . .                                                           | 31 |
| 3.3.6  | Response time trends of differential genes and gene clusters . . . . .                                   | 31 |
| 3.3.7  | Gene set enrichment results . . . . .                                                                    | 32 |
| 3.3.8  | Protein-protein interaction networks . . . . .                                                           | 32 |
| 3.3.9  | Gene responses correlated with changes in serum cytokine/chemokine, or anti-body concentration . . . . . | 32 |
| 3.3.10 | Gene responses that differentiate between seroprotection status . . . . .                                | 33 |
| 3.4    | Flow cytometric immune cell phenotyping and activation results . . . . .                                 | 33 |

## List of Figures

|            |                                                                                                             |    |
|------------|-------------------------------------------------------------------------------------------------------------|----|
| Figure A1  | Consort diagram. . . . .                                                                                    | 35 |
| Figure A2  | Local and systemic reactivity by severity and study arm. . . . .                                            | 36 |
| Figure A3  | Eotaxin-1 (CCL11) Time Trend Plots . . . . .                                                                | 37 |
| Figure A4  | Interferon Gamma (IFN- $\gamma$ ) Time Trend Plots . . . . .                                                | 38 |
| Figure A5  | Interleukin-1 Alpha (IL-1 $\alpha$ ) Time Trend Plots . . . . .                                             | 39 |
| Figure A6  | Interleukin-1 Beta (IL-1 $\beta$ ) Time Trend Plots . . . . .                                               | 40 |
| Figure A7  | Interleukin-6 (IL-6) Time Trend Plots . . . . .                                                             | 41 |
| Figure A8  | Interleukin-8 (IL-8) Time Trend Plots . . . . .                                                             | 42 |
| Figure A9  | Interleukin-10 (IL-10) Time Trend Plots . . . . .                                                           | 43 |
| Figure A10 | Interleukin-12 p70 (IL-12p70) Time Trend Plots . . . . .                                                    | 44 |
| Figure A11 | Lymphotoxin-alpha (LT- $\alpha$ ) Time Trend Plots . . . . .                                                | 45 |
| Figure A12 | Interferon Gamma-Induced Protein 10 (IP-10) Time Trend Plots . . . . .                                      | 46 |
| Figure A13 | Monocyte Chemoattractant Protein-1 (MCP-1) Time Trend Plots . . . . .                                       | 47 |
| Figure A14 | Macrophage Inflammatory Protein (MIP-1 $\alpha$ ) Time Trend Plots . . . . .                                | 48 |
| Figure A15 | Chemokine (C-C motif) Ligand 5 (RANTES) Time Trend Plots . . . . .                                          | 49 |
| Figure A16 | Tumor Necrosis Factors (TNF) Time Trend Plots . . . . .                                                     | 50 |
| Figure A17 | Boxplots of technical variables by cell type (RNA-Seq) . . . . .                                            | 51 |
| Figure A18 | Boxplots of gene model variables by cell type (RNA-Seq) . . . . .                                           | 52 |
| Figure A19 | Starplots of human genome reference alignment statistics (RNA-Seq, B-cells) . . . . .                       | 53 |
| Figure A20 | Starplots of human genome reference alignment statistics (RNA-Seq, Dendritic cells) . . . . .               | 54 |
| Figure A21 | Starplots of human genome reference alignment statistics (RNA-Seq, Monocytes) . . . . .                     | 55 |
| Figure A22 | Starplots of human genome reference alignment statistics (RNA-Seq, Neutrophils) . . . . .                   | 56 |
| Figure A23 | Starplots of human genome reference alignment statistics (RNA-Seq, NK-cells) . . . . .                      | 57 |
| Figure A24 | Starplots of human genome reference alignment statistics (RNA-Seq, T-cells) . . . . .                       | 58 |
| Figure A25 | Boxplots of $\log_2$ counts per million (RNA-Seq, before TMM normalization). . . . .                        | 59 |
| Figure A26 | Boxplots of $\log_2$ counts per million (RNA-Seq after TMM normalization). . . . .                          | 60 |
| Figure A27 | ECDF plots of $\log_2$ counts per million (RNA-Seq, before and after TMM normalization). . . . .            | 61 |
| Figure A28 | PCA biplots (RNA-Seq, n=839) . . . . .                                                                      | 62 |
| Figure A29 | Non-metric multidimensional scaling biplots (RNA-Seq, n=839) . . . . .                                      | 63 |
| Figure A30 | Hierarchical clustering plots (RNA-Seq, n=839). . . . .                                                     | 64 |
| Figure A31 | Heatmap plot of $\log_2$ cpm (RNA-Seq, top-ranking 136 genes, n=839). . . . .                               | 65 |
| Figure A32 | PCA and non-metric multidimensional scaling biplots (RNA-Seq, B-cells and Dendritic cells, n=139) . . . . . | 66 |
| Figure A33 | PCA and non-metric multidimensional scaling biplots (RNA-Seq, Monocytes and Neutrophils, n=139) . . . . .   | 67 |
| Figure A34 | PCA and non-metric multidimensional scaling biplots (RNA-Seq, NK-cells and T-cells, n=140) . . . . .        | 68 |
| Figure A35 | Boxplots of baseline correlation differences by cell type and subject (RNA-Seq, n=20). . . . .              | 69 |
| Figure A36 | Variance component plots (RNA-Seq) . . . . .                                                                | 70 |
| Figure A37 | Correlation with mean %GC content (RNA-Seq). . . . .                                                        | 71 |
| Figure A38 | Example genes with mean %GC content association (RNA-Seq). . . . .                                          | 72 |

|            |                                                                                               |     |
|------------|-----------------------------------------------------------------------------------------------|-----|
| Figure A39 | Baseline PCA biplots (RNA-Seq, n=360)                                                         | 73  |
| Figure A40 | Baseline variance component plots (RNA-Seq)                                                   | 74  |
| Figure A41 | Impact of GC on fold change (RNA-Seq, B-cells)                                                | 75  |
| Figure A42 | Impact of GC on fold change (RNA-Seq, Dendritic cells)                                        | 76  |
| Figure A43 | Impact of GC on fold change (RNA-Seq, Monocytes)                                              | 77  |
| Figure A44 | Impact of GC on fold change (RNA-Seq, Neutrophils)                                            | 78  |
| Figure A45 | Impact of GC on fold change (RNA-Seq, NK-cells)                                               | 79  |
| Figure A46 | Impact of GC on fold change (RNA-Seq, T-cells)                                                | 80  |
| Figure A47 | Model QC summary plots (RNA-Seq, B-cells)                                                     | 82  |
| Figure A48 | Model QC summary plots (RNA-Seq, Dendritic cells)                                             | 83  |
| Figure A49 | Model QC summary plots (RNA-Seq, Monocytes)                                                   | 84  |
| Figure A50 | Model QC summary plots (RNA-Seq, Neutrophils)                                                 | 85  |
| Figure A51 | Model QC summary plots (RNA-Seq, NK-cells)                                                    | 86  |
| Figure A52 | Model QC summary plots (RNA-Seq, T-cells)                                                     | 87  |
| Figure A53 | Venn diagrams of significant gene counts by day and cell type (RNA-Seq, before GC adjustment) | 88  |
| Figure A54 | Venn diagrams of significant gene counts by day and cell type (RNA-Seq, after GC adjustment)  | 89  |
| Figure A55 | Heatmap of baseline log fold change (RNA-Seq, B-cells, Day 1)                                 | 90  |
| Figure A56 | Heatmap of baseline log fold change (RNA-Seq, B-cells, Day 3)                                 | 91  |
| Figure A57 | Heatmap of baseline log fold change (RNA-Seq, B-cells, Day 7)                                 | 92  |
| Figure A58 | Heatmap of baseline log fold change (RNA-Seq, B-cells, Day 28)                                | 93  |
| Figure A59 | Heatmap of baseline log fold change (RNA-Seq, Dendritic cells, Day 1)                         | 94  |
| Figure A60 | Heatmap of baseline log fold change (RNA-Seq, Dendritic cells, Day 3)                         | 95  |
| Figure A61 | Heatmap of baseline log fold change (RNA-Seq, Dendritic cells, Day 7)                         | 96  |
| Figure A62 | Heatmap of baseline log fold change (RNA-Seq, Dendritic cells, Day 28)                        | 97  |
| Figure A63 | Heatmap of baseline log fold change (RNA-Seq, Monocytes, Day 1)                               | 98  |
| Figure A64 | Heatmap of baseline log fold change (RNA-Seq, Monocytes, Day 3)                               | 99  |
| Figure A65 | Heatmap of baseline log fold change (RNA-Seq, Monocytes, Day 7)                               | 100 |
| Figure A66 | Heatmap of baseline log fold change (RNA-Seq, Monocytes, Day 28)                              | 101 |
| Figure A67 | Heatmap of baseline log fold change (RNA-Seq, Neutrophils, Day 1)                             | 102 |
| Figure A68 | Heatmap of baseline log fold change (RNA-Seq, Neutrophils, Day 3)                             | 103 |
| Figure A69 | Heatmap of baseline log fold change (RNA-Seq, Neutrophils, Day 7)                             | 104 |
| Figure A70 | Heatmap of baseline log fold change (RNA-Seq, Neutrophils, Day 28)                            | 105 |
| Figure A71 | Heatmap of baseline log fold change (RNA-Seq, NK-cells, Day 1)                                | 106 |
| Figure A72 | Heatmap of baseline log fold change (RNA-Seq, NK-cells, Day 3)                                | 107 |
| Figure A73 | Heatmap of baseline log fold change (RNA-Seq, NK-cells, Day 7)                                | 108 |
| Figure A74 | Heatmap of baseline log fold change (RNA-Seq, NK-cells, Day 28)                               | 109 |
| Figure A75 | Heatmap of baseline log fold change (RNA-Seq, T-cells, Day 1)                                 | 110 |
| Figure A76 | Heatmap of baseline log fold change (RNA-Seq, T-cells, Day 3)                                 | 111 |
| Figure A77 | Heatmap of baseline log fold change (RNA-Seq, T-cells, Day 7)                                 | 112 |
| Figure A78 | Heatmap of baseline log fold change (RNA-Seq, T-cells, Day 28)                                | 113 |

|             |                                                                                                                                   |     |
|-------------|-----------------------------------------------------------------------------------------------------------------------------------|-----|
| Figure A79  | Heatmaps of GC adjusted log fold change (RNA-Seq, B-cells) . . . . .                                                              | 114 |
| Figure A80  | Heatmaps of GC adjusted log fold change (RNA-Seq, Dendritic cells) . . . . .                                                      | 115 |
| Figure A81  | Heatmaps of GC adjusted log fold change (RNA-Seq, Monocytes) . . . . .                                                            | 116 |
| Figure A82  | Heatmaps of GC adjusted log fold change (RNA-Seq, Neutrophils) . . . . .                                                          | 117 |
| Figure A83  | Heatmaps of GC adjusted log fold change (RNA-Seq, NK-cells) . . . . .                                                             | 118 |
| Figure A84  | Heatmaps of GC adjusted log fold change (RNA-Seq, T-cells) . . . . .                                                              | 119 |
| Figure A85  | Gene cluster dendrogram with bootstrap probabilities (RNA-Seq, B-cells, Day 1) . . . . .                                          | 120 |
| Figure A86  | Gene cluster dendrogram with bootstrap probabilities (RNA-Seq, B-cells, Day 1-28) . . . . .                                       | 120 |
| Figure A87  | Gene cluster dendrogram with bootstrap probabilities (RNA-Seq, Dendritic cells, Day 1) . . . . .                                  | 121 |
| Figure A88  | Gene cluster dendrogram with bootstrap probabilities (RNA-Seq, Dendritic cells, Day 3) . . . . .                                  | 121 |
| Figure A89  | Gene cluster dendrogram with bootstrap probabilities (RNA-Seq, Dendritic cells, Day 1-28) . . . . .                               | 121 |
| Figure A90  | Gene cluster dendrogram with bootstrap probabilities (RNA-Seq, Monocytes, Day 1) . . . . .                                        | 122 |
| Figure A91  | Gene cluster dendrogram with bootstrap probabilities (RNA-Seq, Monocytes, Day 1-28) . . . . .                                     | 122 |
| Figure A92  | Gene cluster dendrogram with bootstrap probabilities (RNA-Seq, Neutrophils, Day 1) . . . . .                                      | 122 |
| Figure A93  | Gene cluster dendrogram with bootstrap probabilities (RNA-Seq, Neutrophils, Day 3) . . . . .                                      | 123 |
| Figure A94  | Gene cluster dendrogram with bootstrap probabilities (RNA-Seq, Neutrophils, Day 1-28) . . . . .                                   | 123 |
| Figure A95  | Gene cluster dendrogram with bootstrap probabilities (RNA-Seq, NK-cells, Day 1) . . . . .                                         | 123 |
| Figure A96  | Gene cluster dendrogram with bootstrap probabilities (RNA-Seq, NK-cells, Day 3) . . . . .                                         | 124 |
| Figure A97  | Gene cluster dendrogram with bootstrap probabilities (RNA-Seq, NK-cells, Day 28) . . . . .                                        | 124 |
| Figure A98  | Gene cluster dendrogram with bootstrap probabilities (RNA-Seq, NK-cells, Day 1-28) . . . . .                                      | 124 |
| Figure A99  | Gene cluster dendrogram with bootstrap probabilities (RNA-Seq, T-cells, Day 1) . . . . .                                          | 125 |
| Figure A100 | Gene cluster dendrogram with bootstrap probabilities (RNA-Seq, T-cells, Day 1-28) . . . . .                                       | 125 |
| Figure A101 | Gene cluster time trends of baseline log fold change by vaccine group (RNA-Seq, B-cells, Dendritic cells, and Monocytes). . . . . | 126 |
| Figure A102 | Gene cluster time trends of baseline log fold change by vaccine group (RNA-Seq, Monocytes and Neutrophils). . . . .               | 127 |
| Figure A103 | Gene cluster time trends of baseline log fold change by vaccine group (RNA-Seq, Neutrophils continued). . . . .                   | 128 |
| Figure A104 | Gene cluster time trends of baseline log fold change by vaccine group (RNA-Seq, Neutrophils continued). . . . .                   | 129 |
| Figure A105 | Gene cluster time trends of baseline log fold change by vaccine group (RNA-Seq, NK-cells and T-cells). . . . .                    | 130 |
| Figure A106 | Heatmap of baseline log fold changes for known antigen presentation genes by vaccine group (RNA-Seq, Dendritic cells). . . . .    | 131 |
| Figure A107 | Heatmap of baseline log fold changes for known antigen presentation genes by vaccine group (RNA-Seq, Monocytes). . . . .          | 132 |
| Figure A108 | Heatmap of baseline log fold changes for known antigen presentation genes by vaccine group (RNA-Seq, Neutrophils). . . . .        | 133 |
| Figure A109 | Heatmap of baseline log fold changes for known antigen presentation genes by vaccine group (RNA-Seq, NK-cells). . . . .           | 134 |
| Figure A110 | Time trends of baseline log fold change for MHC I genes by cell type and vaccine group (RNA-Seq). . . . .                         | 135 |

|             |                                                                                                    |     |
|-------------|----------------------------------------------------------------------------------------------------|-----|
| Figure A111 | Time trends of baseline log fold change for MHC II genes by cell type and vaccine group (RNA-Seq). | 136 |
| Figure A112 | Heatmap of enriched KEGG Pathways (RNA-Seq)                                                        | 137 |
| Figure A113 | Heatmap of enriched MSigDB GO Biological Processes (RNA-Seq)                                       | 138 |
| Figure A114 | Heatmap of enriched MSigDB GO Cellular Components (RNA-Seq)                                        | 139 |
| Figure A115 | Heatmap of enriched MSigDB Reactome Pathways (RNA-Seq)                                             | 140 |
| Figure A116 | Heatmap of enriched MSigDB Chemical/Genetic Perturbation gene sets (RNA-Seq)                       | 141 |
| Figure A117 | Heatmap of enriched MSigDB Immunologic Signature gene sets (RNA-Seq)                               | 142 |
| Figure A118 | Pathway map - Influenza A (RNA-Seq, Dendritic cells, Day 1)                                        | 143 |
| Figure A119 | Pathway map - Influenza A (RNA-Seq, Monocytes, Day 1)                                              | 144 |
| Figure A120 | Pathway map - Influenza A (RNA-Seq, Neutrophils, Day 1)                                            | 145 |
| Figure A121 | Pathway map - Influenza A (RNA-Seq, Neutrophils, Day 3)                                            | 146 |
| Figure A122 | Pathway map - Influenza A (RNA-Seq, NK-cells, Day 28)                                              | 147 |
| Figure A123 | Pathway map - Influenza A (RNA-Seq, T-cells, Day 1)                                                | 148 |
| Figure A124 | Pathway map - Antigen processing and presentation (RNA-Seq, Dendritic cells, Day 1)                | 149 |
| Figure A125 | Pathway map - Antigen processing and presentation (RNA-Seq, Monocytes, Day 1)                      | 150 |
| Figure A126 | Pathway map - Antigen processing and presentation (RNA-Seq, Neutrophils, Day 1)                    | 151 |
| Figure A127 | Pathway map - Antigen processing and presentation (RNA-Seq, NK-cells, Day 28)                      | 152 |
| Figure A128 | Pathway map - Proteasome (RNA-Seq, Neutrophils, Day 1)                                             | 153 |
| Figure A129 | Pathway map - Cell cycle (RNA-Seq, NK-cells, Day 3)                                                | 154 |
| Figure A130 | Pathway map - Phagosome (RNA-Seq, Monocytes, Day 1)                                                | 155 |
| Figure A131 | Pathway map - Phagosome (RNA-Seq, Neutrophils, Day 1)                                              | 156 |
| Figure A132 | Pathway map - Phagosome (RNA-Seq, NK-cells, Day 28)                                                | 157 |
| Figure A133 | Pathway map - Cell adhesion molecules (CAMs) (RNA-Seq, Neutrophils, Day 1)                         | 158 |
| Figure A134 | Pathway map - Cell adhesion molecules (CAMs) (RNA-Seq, NK-cells, Day 28)                           | 159 |
| Figure A135 | Pathway map - Complement and coagulation cascades (RNA-Seq, Dendritic cells, Day 1)                | 160 |
| Figure A136 | Pathway map - NOD-like receptor signaling pathway (RNA-Seq, Neutrophils, Day 1)                    | 161 |
| Figure A137 | Pathway map - RIG-I-like receptor signaling pathway (RNA-Seq, Neutrophils, Day 1)                  | 162 |
| Figure A138 | Protein-protein interaction network based on significant genes (RNA-Seq, B-cells, Day 1)           | 163 |
| Figure A139 | Protein-protein interaction network based on significant genes (RNA-Seq, Dendritic cells, Day 1)   | 164 |
| Figure A140 | Protein-protein interaction network based on significant genes (RNA-Seq, Monocytes, Day 1)         | 165 |
| Figure A141 | Protein-protein interaction network based on significant genes (RNA-Seq, Neutrophils, Day 1)       | 166 |
| Figure A142 | Protein-protein interaction network based on significant genes (RNA-Seq, Neutrophils, Day 3)       | 167 |
| Figure A143 | Protein-protein interaction network based on significant genes (RNA-Seq, NK-cells, Day 1)          | 168 |
| Figure A144 | Protein-protein interaction network based on significant genes (RNA-Seq, NK-cells, Day 3)          | 169 |
| Figure A145 | Protein-protein interaction network based on significant genes (RNA-Seq, NK-cells, Day 28)         | 170 |
| Figure A146 | Protein-protein interaction network based on significant genes (RNA-Seq, T-cells, Day 1)           | 171 |

|             |                                                                                                                                        |     |
|-------------|----------------------------------------------------------------------------------------------------------------------------------------|-----|
| Figure A147 | Protein-protein interaction network based on significant genes (RNA-Seq, Dendritic cells, Monocytes, and Neutrophils, Day 1)           | 172 |
| Figure A148 | Canonical correlation plots (RNA-Seq, B-cells, Day 1)                                                                                  | 173 |
| Figure A149 | Canonical correlation plots (RNA-Seq, B-cells, Day 3)                                                                                  | 173 |
| Figure A150 | Canonical correlation plots (RNA-Seq, B-cells, Day 7)                                                                                  | 174 |
| Figure A151 | Canonical correlation plots (RNA-Seq, B-cells, Day 28)                                                                                 | 174 |
| Figure A152 | Canonical correlation plots (RNA-Seq, Dendritic cells, Day 1)                                                                          | 175 |
| Figure A153 | Canonical correlation plots (RNA-Seq, Dendritic cells, Day 3)                                                                          | 176 |
| Figure A154 | Canonical correlation plots (RNA-Seq, Dendritic cells, Day 7)                                                                          | 177 |
| Figure A155 | Canonical correlation plots (RNA-Seq, Monocytes, Day 1)                                                                                | 177 |
| Figure A156 | Canonical correlation plots (RNA-Seq, Monocytes, Day 3)                                                                                | 178 |
| Figure A157 | Canonical correlation plots (RNA-Seq, Monocytes, Day 28)                                                                               | 178 |
| Figure A158 | Canonical correlation plots (RNA-Seq, Neutrophils, Day 1)                                                                              | 179 |
| Figure A159 | Canonical correlation plots (RNA-Seq, Neutrophils, Day 7)                                                                              | 179 |
| Figure A160 | Canonical correlation plots (RNA-Seq, Neutrophils, Day 28)                                                                             | 180 |
| Figure A161 | Canonical correlation plots (RNA-Seq, NK-cells, Day 1)                                                                                 | 180 |
| Figure A162 | Canonical correlation plots (RNA-Seq, NK-cells, Day 3)                                                                                 | 181 |
| Figure A163 | Canonical correlation plots (RNA-Seq, NK-cells, Day 7)                                                                                 | 181 |
| Figure A164 | Canonical correlation plots (RNA-Seq, NK-cells, Day 28)                                                                                | 182 |
| Figure A165 | Canonical correlation plots (RNA-Seq, T-cells, Day 1)                                                                                  | 182 |
| Figure A166 | Canonical correlation plots (RNA-Seq, T-cells, Day 3)                                                                                  | 183 |
| Figure A167 | Canonical correlation plots (RNA-Seq, T-cells, Day 7)                                                                                  | 183 |
| Figure A168 | Canonical correlation plots (RNA-Seq, T-cells, Day 28)                                                                                 | 184 |
| Figure A169 | Canonical correlation plots (RNA-Seq, B-cells, Day 1, SV-AS03 vs. SV-PBS)                                                              | 184 |
| Figure A170 | Canonical correlation plots (RNA-Seq, B-cells, Day 3, SV-AS03 vs. SV-PBS)                                                              | 185 |
| Figure A171 | Canonical correlation plots (RNA-Seq, Dendritic cells, Day 3, SV-AS03 vs. SV-PBS)                                                      | 186 |
| Figure A172 | Canonical correlation plots (RNA-Seq, Monocytes, Day 3, SV-AS03 vs. SV-PBS)                                                            | 187 |
| Figure A173 | Canonical correlation plots (RNA-Seq, Monocytes, Day 28, SV-AS03 vs. SV-PBS)                                                           | 188 |
| Figure A174 | Canonical correlation plots (RNA-Seq, Neutrophils, Day 1, SV-AS03 vs. SV-PBS)                                                          | 189 |
| Figure A175 | Canonical correlation plots (RNA-Seq, Neutrophils, Day 28, SV-AS03 vs. SV-PBS)                                                         | 190 |
| Figure A176 | Canonical correlation plots (RNA-Seq, NK-cells, Day 3, SV-AS03 vs. SV-PBS)                                                             | 191 |
| Figure A177 | Canonical correlation plots (RNA-Seq, T-cells, Day 3, SV-AS03 vs. SV-PBS)                                                              | 192 |
| Figure A178 | Boxplots of percent cell activation by cell type (FACS, CD69)                                                                          | 193 |
| Figure A179 | Boxplots of percent cell activation by cell type (FACS, CD86)                                                                          | 194 |
| Figure A180 | Boxplots of percent cell activation by cell type (FACS, CD134)                                                                         | 195 |
| Figure A181 | Non-metric multidimensional scaling biplots for each cell activation marker (FACS)                                                     | 196 |
| Figure A182 | Scatterplots of percent cell activation by detector setting (FACS, CD69, T-cells, neutrophils, monocytes, colored by vaccine group)    | 198 |
| Figure A183 | Scatterplots of percent cell activation by detector setting (FACS, CD69, B-cells, dendritic cells, NK-cells, colored by vaccine group) | 199 |
| Figure A184 | Scatterplots of percent cell activation by detector setting (FACS, CD69, T-cells, neutrophils, monocytes, colored by study visit day)  | 200 |

|             |                                                                                                                                           |     |
|-------------|-------------------------------------------------------------------------------------------------------------------------------------------|-----|
| Figure A185 | Scatterplots of percent cell activation by detector setting (FACS, CD69, B-cells, dendritic cells, NK-cells, colored by study visit day)  | 201 |
| Figure A186 | Scatterplots of percent cell activation by detector setting (FACS, CD86, T-cells, neutrophils, monocytes, colored by vaccine group)       | 202 |
| Figure A187 | Scatterplots of percent cell activation by detector setting (FACS, CD86, B-cells, dendritic cells, NK-cells, colored by vaccine group)    | 203 |
| Figure A188 | Scatterplots of percent cell activation by detector setting (FACS, CD86, T-cells, neutrophils, monocytes, colored by study visit day)     | 204 |
| Figure A189 | Scatterplots of percent cell activation by detector setting (FACS, CD86, B-cells, dendritic cells, NK-cells, colored by study visit day)  | 205 |
| Figure A190 | Scatterplots of percent cell activation by detector setting (FACS, CD134, T-cells, neutrophils, monocytes, colored by vaccine group)      | 206 |
| Figure A191 | Scatterplots of percent cell activation by detector setting (FACS, CD134, B-cells, dendritic cells, NK-cells, colored by vaccine group)   | 207 |
| Figure A192 | Scatterplots of percent cell activation by detector setting (FACS, CD134, T-cells, neutrophils, monocytes, colored by study visit day)    | 208 |
| Figure A193 | Scatterplots of percent cell activation by detector setting (FACS, CD134, B-cells, dendritic cells, NK-cells, colored by study visit day) | 209 |
| Figure A194 | Median normalized cell activation plots for CD69 (FACS, B-cells)                                                                          | 210 |
| Figure A195 | Median normalized cell activation plots for CD86 (FACS, B-cells)                                                                          | 211 |
| Figure A196 | Median normalized cell activation plots for CD134 (FACS, B-cells)                                                                         | 212 |
| Figure A197 | Median normalized cell activation plots for CD69 (FACS, Dendritic Cells)                                                                  | 213 |
| Figure A198 | Median normalized cell activation plots for CD86 (FACS, Dendritic Cells)                                                                  | 214 |
| Figure A199 | Median normalized cell activation plots for CD134 (FACS, Dendritic Cells)                                                                 | 215 |
| Figure A200 | Median normalized cell activation plots for CD69 (FACS, Monocytes)                                                                        | 216 |
| Figure A201 | Median normalized cell activation plots for CD86 (FACS, Monocytes)                                                                        | 217 |
| Figure A202 | Median normalized cell activation plots for CD134 (FACS, Monocytes)                                                                       | 218 |
| Figure A203 | Median normalized cell activation plots for CD69 (FACS, Neutrophils)                                                                      | 219 |
| Figure A204 | Median normalized cell activation plots for CD86 (FACS, Neutrophils)                                                                      | 220 |
| Figure A205 | Median normalized cell activation plots for CD134 (FACS, Neutrophils)                                                                     | 221 |
| Figure A206 | Median normalized cell activation plots for CD69 (FACS, NK-Cells)                                                                         | 222 |
| Figure A207 | Median normalized cell activation plots for CD86 (FACS, NK-Cells)                                                                         | 223 |
| Figure A208 | Median normalized cell activation plots for CD134 (FACS, NK-Cells)                                                                        | 224 |
| Figure A209 | Median normalized cell activation plots for CD69 (FACS, T-Cells)                                                                          | 225 |
| Figure A210 | Median normalized cell activation plots for CD86 (FACS, T-Cells)                                                                          | 226 |
| Figure A211 | Median normalized cell activation plots for CD134 (FACS, T-Cells)                                                                         | 227 |
| Figure A212 | Spider plots of median fold change in the percentage of live cells for each immune cell type.                                             | 228 |
| Figure A213 | Spider plots of median fold change in the number of live cells per mL for each immune cell type.                                          | 228 |
| Figure A214 | Morel et al. (2011) SV-AS03-responsive genes in mouse (RNA-Seq).                                                                          | 229 |
| Figure A215 | Mosca et al. (2008) MF59, CpG, MF59+CpG, and Alum-responsive genes in mouse (RNA-Seq).                                                    | 230 |



Figure A216 Time trends of baseline log fold change for CXCR3 by cell type and vaccine group (RNA-Seq). . . . . 231

## List of Tables

|           |                                                                                                                                                                 |     |
|-----------|-----------------------------------------------------------------------------------------------------------------------------------------------------------------|-----|
| Table A1  | Demographic data by study group . . . . .                                                                                                                       | 231 |
| Table A2  | Maximum severity of solicited adverse events by vaccination (SV-AS03) . . . . .                                                                                 | 232 |
| Table A3  | Maximum severity of solicited adverse events by vaccination (SV-PBS) . . . . .                                                                                  | 233 |
| Table A4  | Intend-to-treat population. Summary of hemagglutination inhibition titer/responses against A/Indonesia/05/2005 by study arm and visit (Immunogenicity). . . . . | 234 |
| Table A5  | Per-protocol population. Summary of hemagglutination inhibition titer/responses against A/Indonesia/05/2005 by study arm and visit (Immunogenicity). . . . .    | 235 |
| Table A6  | Intend-to-treat population. Summary of neutralizing antibody titer/response against A/Indonesia/05/2005 by study arm and visit (Immunogenicity). . . . .        | 236 |
| Table A7  | Per-protocol population. Summary of neutralizing antibody titer/response against A/Indonesia/05/2005 by study arm and visit (Immunogenicity). . . . .           | 237 |
| Table A8  | Cytokine and chemokine limits of detection. . . . .                                                                                                             | 238 |
| Table A9  | Number of excluded genes by category/chromosome (RNA-Seq). . . . .                                                                                              | 238 |
| Table A10 | Number of genes that passed the low expression cut off (RNA-Seq). . . . .                                                                                       | 238 |
| Table A11 | Summary statistics (RNA-Seq, technical variables) . . . . .                                                                                                     | 239 |
| Table A12 | Summary statistics (RNA-Seq, gene model variables) . . . . .                                                                                                    | 239 |
| Table A13 | Spearman correlation with technical variables (RNA-Seq, original variables). . . . .                                                                            | 240 |
| Table A14 | Spearman correlation with technical variables (RNA-Seq, standardized variables). . . . .                                                                        | 240 |
| Table A15 | Spearman correlation with gene model variables (RNA-Seq, original variables). . . . .                                                                           | 241 |
| Table A16 | Spearman correlation with gene model variables (RNA-Seq, standardized variables). . . . .                                                                       | 241 |
| Table A17 | Sources of variation (n=839, standardized variables, PC1) . . . . .                                                                                             | 241 |
| Table A18 | Sources of variation (n=839, standardized variables, PC2) . . . . .                                                                                             | 241 |
| Table A19 | Outlying observations (RNA-Seq). . . . .                                                                                                                        | 242 |
| Table A20 | Correlation between TMM normalization factors (RNA-Seq, all versus per-cell). . . . .                                                                           | 242 |
| Table A21 | Spearman correlation with technical variables (RNA-Seq, B-cells). . . . .                                                                                       | 242 |
| Table A22 | Spearman correlation with technical variables (RNA-Seq, Dendritic cells). . . . .                                                                               | 243 |
| Table A23 | Spearman correlation with technical variables (RNA-Seq, Monocytes). . . . .                                                                                     | 243 |
| Table A24 | Spearman correlation with technical variables (RNA-Seq, Neutrophils). . . . .                                                                                   | 243 |
| Table A25 | Spearman correlation with technical variables (RNA-Seq, NK-cells). . . . .                                                                                      | 244 |
| Table A26 | Spearman correlation with technical variables (RNA-Seq, T-cells). . . . .                                                                                       | 244 |
| Table A27 | Spearman correlation with gene model variables (RNA-Seq, B-cells). . . . .                                                                                      | 245 |
| Table A28 | Spearman correlation with gene model variables (RNA-Seq, Dendritic cells). . . . .                                                                              | 245 |
| Table A29 | Spearman correlation with gene model variables (RNA-Seq, Monocytes). . . . .                                                                                    | 246 |
| Table A30 | Spearman correlation with gene model variables (RNA-Seq, Neutrophils). . . . .                                                                                  | 246 |
| Table A31 | Spearman correlation with gene model variables (RNA-Seq, NK-cells). . . . .                                                                                     | 247 |
| Table A32 | Spearman correlation with gene model variables (RNA-Seq, T-cells). . . . .                                                                                      | 247 |
| Table A33 | Baseline sources of variation (RNA-Seq, All Cells, PC1) . . . . .                                                                                               | 248 |
| Table A34 | Baseline sources of variation (RNA-Seq, All Cells, PC2) . . . . .                                                                                               | 248 |
| Table A35 | Baseline sources of variation (RNA-Seq, B-cells, PC1) . . . . .                                                                                                 | 248 |
| Table A36 | Baseline sources of variation (RNA-Seq, B-cells, PC2) . . . . .                                                                                                 | 248 |
| Table A37 | Baseline sources of variation (RNA-Seq, Dendritic cells, PC1) . . . . .                                                                                         | 248 |

|           |                                                                                             |     |
|-----------|---------------------------------------------------------------------------------------------|-----|
| Table A38 | Baseline sources of variation (RNA-Seq, Dendritic cells, PC2)                               | 248 |
| Table A39 | Baseline sources of variation (RNA-Seq, Monocytes, PC1)                                     | 248 |
| Table A40 | Baseline sources of variation (RNA-Seq, Monocytes, PC2)                                     | 248 |
| Table A41 | Baseline sources of variation (RNA-Seq, Neutrophils, PC1)                                   | 248 |
| Table A42 | Baseline sources of variation (RNA-Seq, Neutrophils, PC2)                                   | 249 |
| Table A43 | Baseline sources of variation (RNA-Seq, NK-cells, PC1)                                      | 249 |
| Table A44 | Baseline sources of variation (RNA-Seq, NK-cells, PC2)                                      | 249 |
| Table A45 | Baseline sources of variation (RNA-Seq, T-cells, PC1)                                       | 249 |
| Table A46 | Baseline sources of variation (RNA-Seq, T-cells, PC2)                                       | 249 |
| Table A47 | Genes with high baseline variability (RNA-Seq, B-cells)                                     | 250 |
| Table A48 | Genes with high baseline variability (RNA-Seq, Dendritic cells)                             | 252 |
| Table A49 | Genes with high baseline variability (RNA-Seq, Monocytes)                                   | 253 |
| Table A50 | Genes with high baseline variability (RNA-Seq, Neutrophils)                                 | 253 |
| Table A51 | Genes with high baseline variability (RNA-Seq, NK-cells)                                    | 254 |
| Table A52 | Genes with high baseline variability (RNA-Seq, T-cells)                                     | 255 |
| Table A53 | Impact of using multiple baseline measures on gene response (RNA-Seq).                      | 255 |
| Table A54 | Statistically significant genes by gene type, cell type, and day (RNA-Seq).                 | 256 |
| Table A55 | Statistically significant genes by gene type and cell type, (RNA-Seq).                      | 256 |
| Table A56 | Overlap of significantly differentially expressed genes between cell types (RNA-Seq, Day 1) | 257 |
| Table A57 | Genes significantly differentially expressed in all six cell types (RNA-Seq, Day 1)         | 257 |
| Table A58 | Significant gene clusters (RNA-Seq, B-cells, Day 1)                                         | 257 |
| Table A59 | Significant gene clusters (RNA-Seq, B-cells, Day 1-28)                                      | 258 |
| Table A60 | Significant gene clusters (RNA-Seq, Dendritic cells, Day 1)                                 | 259 |
| Table A61 | Significant gene clusters (RNA-Seq, Dendritic cells, Day 1-28)                              | 259 |
| Table A62 | Significant gene clusters (RNA-Seq, Monocytes, Day 1)                                       | 261 |
| Table A63 | Significant gene clusters (RNA-Seq, Monocytes, Day 1-28)                                    | 263 |
| Table A64 | Significant gene clusters (RNA-Seq, Neutrophils, Day 1)                                     | 266 |
| Table A65 | Significant gene clusters (RNA-Seq, Neutrophils, Day 3)                                     | 268 |
| Table A66 | Significant gene clusters (RNA-Seq, Neutrophils, Day 1-28)                                  | 269 |
| Table A67 | Significant gene clusters (RNA-Seq, NK-cells, Day 1)                                        | 270 |
| Table A68 | Significant gene clusters (RNA-Seq, NK-cells, Day 3)                                        | 271 |
| Table A69 | Significant gene clusters (RNA-Seq, NK-cells, Day 28)                                       | 272 |
| Table A70 | Significant gene clusters (RNA-Seq, NK-cells, Day 1-28)                                     | 272 |
| Table A71 | Significant gene clusters (RNA-Seq, T-cells, Day 1)                                         | 273 |
| Table A72 | Significant gene clusters (RNA-Seq, T-cells, Day 1-28)                                      | 274 |
| Table A73 | Overview of gene sets used for the enrichment analysis (RNA-Seq).                           | 275 |
| Table A74 | Overview of differential genes that mapped to any gene set by category (RNA-Seq).           | 275 |
| Table A75 | Significantly enriched MSigDB Chemical/Genetic Perturbation Sets (RNA-Seq, B-cells, Day 1)  | 277 |
| Table A76 | Significantly enriched KEGG Pathways (RNA-Seq, Dendritic cells, Day 1)                      | 277 |
| Table A77 | Significantly enriched MSigDB GO Biological Processes (RNA-Seq, Dendritic cells, Day 1)     | 277 |
| Table A78 | Significantly enriched MSigDB GO Cellular Components (RNA-Seq, Dendritic cells, Day 1)      | 278 |

|            |                                                                                                    |     |
|------------|----------------------------------------------------------------------------------------------------|-----|
| Table A79  | Significantly enriched MSigDB BioCarta Pathways (RNA-Seq, Dendritic cells, Day 1)                  | 278 |
| Table A80  | Significantly enriched MSigDB Chemical/Genetic Perturbation Sets (RNA-Seq, Dendritic cells, Day 1) | 285 |
| Table A81  | Significantly enriched MSigDB Chemical/Genetic Perturbation Sets (RNA-Seq, Dendritic cells, Day 3) | 285 |
| Table A82  | Significantly enriched KEGG Pathways (RNA-Seq, Monocytes, Day 1)                                   | 286 |
| Table A83  | Significantly enriched MSigDB GO Biological Processes (RNA-Seq, Monocytes, Day 1)                  | 287 |
| Table A84  | Significantly enriched MSigDB GO Cellular Components (RNA-Seq, Monocytes, Day 1)                   | 287 |
| Table A85  | Significantly enriched MSigDB GO Molecular Functions (RNA-Seq, Monocytes, Day 1)                   | 287 |
| Table A86  | Significantly enriched MSigDB BioCarta Pathways (RNA-Seq, Monocytes, Day 1)                        | 287 |
| Table A87  | Significantly enriched MSigDB Chemical/Genetic Perturbation Sets (RNA-Seq, Monocytes, Day 1)       | 296 |
| Table A88  | Significantly enriched KEGG Pathways (RNA-Seq, Neutrophils, Day 1)                                 | 297 |
| Table A89  | Significantly enriched KEGG Modules (RNA-Seq, Neutrophils, Day 1)                                  | 297 |
| Table A90  | Significantly enriched MSigDB GO Biological Processes (RNA-Seq, Neutrophils, Day 1)                | 298 |
| Table A91  | Significantly enriched MSigDB GO Cellular Components (RNA-Seq, Neutrophils, Day 1)                 | 298 |
| Table A92  | Significantly enriched MSigDB GO Molecular Functions (RNA-Seq, Neutrophils, Day 1)                 | 298 |
| Table A93  | Significantly enriched MSigDB Chemical/Genetic Perturbation Sets (RNA-Seq, Neutrophils, Day 1)     | 309 |
| Table A94  | Significantly enriched KEGG Pathways (RNA-Seq, Neutrophils, Day 3)                                 | 309 |
| Table A95  | Significantly enriched MSigDB GO Biological Processes (RNA-Seq, Neutrophils, Day 3)                | 310 |
| Table A96  | Significantly enriched MSigDB Chemical/Genetic Perturbation Sets (RNA-Seq, Neutrophils, Day 3)     | 313 |
| Table A97  | Significantly enriched MSigDB Chemical/Genetic Perturbation Sets (RNA-Seq, NK-cells, Day 1)        | 315 |
| Table A98  | Significantly enriched KEGG Pathways (RNA-Seq, NK-cells, Day 3)                                    | 315 |
| Table A99  | Significantly enriched MSigDB GO Biological Processes (RNA-Seq, NK-cells, Day 3)                   | 316 |
| Table A100 | Significantly enriched MSigDB GO Cellular Components (RNA-Seq, NK-cells, Day 3)                    | 317 |
| Table A101 | Significantly enriched MSigDB GO Molecular Functions (RNA-Seq, NK-cells, Day 3)                    | 317 |
| Table A102 | Significantly enriched MSigDB BioCarta Pathways (RNA-Seq, NK-cells, Day 3)                         | 317 |
| Table A103 | Significantly enriched MSigDB Chemical/Genetic Perturbation Sets (RNA-Seq, NK-cells, Day 3)        | 326 |
| Table A104 | Significantly enriched KEGG Pathways (RNA-Seq, NK-cells, Day 28)                                   | 327 |
| Table A105 | Significantly enriched MSigDB GO Biological Processes (RNA-Seq, NK-cells, Day 28)                  | 327 |
| Table A106 | Significantly enriched MSigDB GO Cellular Components (RNA-Seq, NK-cells, Day 28)                   | 327 |
| Table A107 | Significantly enriched MSigDB GO Molecular Functions (RNA-Seq, NK-cells, Day 28)                   | 327 |
| Table A108 | Significantly enriched MSigDB BioCarta Pathways (RNA-Seq, NK-cells, Day 28)                        | 328 |
| Table A109 | Significantly enriched MSigDB Chemical/Genetic Perturbation Sets (RNA-Seq, NK-cells, Day 28)       | 330 |
| Table A110 | Significantly enriched KEGG Pathways (RNA-Seq, T-cells, Day 1)                                     | 330 |
| Table A111 | Significantly enriched MSigDB Chemical/Genetic Perturbation Sets (RNA-Seq, T-cells, Day 1)         | 334 |

|                                                                                                        |     |
|--------------------------------------------------------------------------------------------------------|-----|
| Table A112 Canonical correlation analysis summary statistics (RNA-Seq, B-cells) . . . . .              | 335 |
| Table A113 Canonical correlation analysis summary statistics (RNA-Seq, Dendritic cells) . . . . .      | 335 |
| Table A114 Canonical correlation analysis summary statistics (RNA-Seq, Monocytes) . . . . .            | 335 |
| Table A115 Canonical correlation analysis summary statistics (RNA-Seq, Neutrophils) . . . . .          | 336 |
| Table A116 Canonical correlation analysis summary statistics (RNA-Seq, NK-cells) . . . . .             | 336 |
| Table A117 Canonical correlation analysis summary statistics (RNA-Seq, T-cells) . . . . .              | 336 |
| Table A118 Canonical loadings and explained variance (RNA-Seq, B-cells, Day 1, Gene variables) . .     | 337 |
| Table A119 Canonical loadings and explained variance (RNA-Seq, B-cells, Day 1, IMO variables) . . .    | 338 |
| Table A120 Canonical loadings and explained variance (RNA-Seq, B-cells, Day 3, Gene variables) . .     | 339 |
| Table A121 Canonical loadings and explained variance (RNA-Seq, B-cells, Day 3, IMO variables) . . .    | 340 |
| Table A122 Canonical loadings and explained variance (RNA-Seq, B-cells, Day 7, Gene variables) . .     | 341 |
| Table A123 Canonical loadings and explained variance (RNA-Seq, B-cells, Day 7, IMO variables) . . .    | 341 |
| Table A124 Canonical loadings and explained variance (RNA-Seq, B-cells, Day 28, Gene variables) . .    | 342 |
| Table A125 Canonical loadings and explained variance (RNA-Seq, B-cells, Day 28, IMO variables) . .     | 342 |
| Table A126 Canonical loadings and explained variance (RNA-Seq, Dendritic cells, Day 1, Gene variables) | 347 |
| Table A127 Canonical loadings and explained variance (RNA-Seq, Dendritic cells, Day 1, IMO variables)  | 348 |
| Table A128 Canonical loadings and explained variance (RNA-Seq, Dendritic cells, Day 3, Gene variables) | 349 |
| Table A129 Canonical loadings and explained variance (RNA-Seq, Dendritic cells, Day 3, IMO variables)  | 350 |
| Table A130 Canonical loadings and explained variance (RNA-Seq, Dendritic cells, Day 7, Gene variables) | 350 |
| Table A131 Canonical loadings and explained variance (RNA-Seq, Dendritic cells, Day 7, IMO variables)  | 351 |
| Table A132 Canonical loadings and explained variance (RNA-Seq, Monocytes, Day 1, Gene variables)       | 359 |
| Table A133 Canonical loadings and explained variance (RNA-Seq, Monocytes, Day 1, IMO variables) .      | 360 |
| Table A134 Canonical loadings and explained variance (RNA-Seq, Monocytes, Day 3, Gene variables)       | 361 |
| Table A135 Canonical loadings and explained variance (RNA-Seq, Monocytes, Day 3, IMO variables) .      | 361 |
| Table A136 Canonical loadings and explained variance (RNA-Seq, Monocytes, Day 28, Gene variables)      | 362 |
| Table A137 Canonical loadings and explained variance (RNA-Seq, Monocytes, Day 28, IMO variables)       | 362 |
| Table A138 Canonical loadings and explained variance (RNA-Seq, Neutrophils, Day 1, Gene variables)     | 377 |
| Table A139 Canonical loadings and explained variance (RNA-Seq, Neutrophils, Day 1, IMO variables) .    | 378 |
| Table A140 Canonical loadings and explained variance (RNA-Seq, Neutrophils, Day 7, Gene variables)     | 379 |
| Table A141 Canonical loadings and explained variance (RNA-Seq, Neutrophils, Day 7, IMO variables) .    | 379 |
| Table A142 Canonical loadings and explained variance (RNA-Seq, Neutrophils, Day 28, Gene variables)    | 381 |
| Table A143 Canonical loadings and explained variance (RNA-Seq, Neutrophils, Day 28, IMO variables)     | 381 |
| Table A144 Canonical loadings and explained variance (RNA-Seq, NK-cells, Day 1, Gene variables) . .    | 384 |
| Table A145 Canonical loadings and explained variance (RNA-Seq, NK-cells, Day 1, IMO variables) . .     | 384 |
| Table A146 Canonical loadings and explained variance (RNA-Seq, NK-cells, Day 3, Gene variables) . .    | 387 |
| Table A147 Canonical loadings and explained variance (RNA-Seq, NK-cells, Day 3, IMO variables) . .     | 387 |
| Table A148 Canonical loadings and explained variance (RNA-Seq, NK-cells, Day 7, Gene variables) . .    | 388 |
| Table A149 Canonical loadings and explained variance (RNA-Seq, NK-cells, Day 7, IMO variables) . .     | 388 |
| Table A150 Canonical loadings and explained variance (RNA-Seq, NK-cells, Day 28, Gene variables) .     | 394 |
| Table A151 Canonical loadings and explained variance (RNA-Seq, NK-cells, Day 28, IMO variables) . .    | 395 |
| Table A152 Canonical loadings and explained variance (RNA-Seq, T-cells, Day 1, Gene variables) . . .   | 396 |
| Table A153 Canonical loadings and explained variance (RNA-Seq, T-cells, Day 1, IMO variables) . . .    | 397 |

|                                                                                                                   |     |
|-------------------------------------------------------------------------------------------------------------------|-----|
| Table A154 Canonical loadings and explained variance (RNA-Seq, T-cells, Day 3, Gene variables) . . .              | 397 |
| Table A155 Canonical loadings and explained variance (RNA-Seq, T-cells, Day 3, IMO variables) . . .               | 398 |
| Table A156 Canonical loadings and explained variance (RNA-Seq, T-cells, Day 7, Gene variables) . . .              | 398 |
| Table A157 Canonical loadings and explained variance (RNA-Seq, T-cells, Day 7, IMO variables) . . .               | 399 |
| Table A158 Canonical loadings and explained variance (RNA-Seq, T-cells, Day 28, Gene variables) . . .             | 399 |
| Table A159 Canonical loadings and explained variance (RNA-Seq, T-cells, Day 28, IMO variables) . . .              | 400 |
| Table A160 Regularized seroprotection logistic regression model summary statistics (RNA-Seq, Day 1)               | 401 |
| Table A161 Median fold change in the percentage of live cells by immune cell type and treatment group.            | 402 |
| Table A162 Median fold change in the number of live cells per mL by immune cell type and treatment group. . . . . | 403 |
| Table A163 Samples with incomplete cell activation measures (FACS). . . . .                                       | 404 |
| Table A164 Outlying cell activation samples (FACS). . . . .                                                       | 405 |
| Table A165 List of R packages and versions used for the analyses presented in this report. . . . .                | 406 |

## 1 Introduction

This appendix provides supporting information for the manuscript entitled "Cell-based Systems Biology Analysis of Human AS03-adjuvanted H5N1 Avian Influenza Vaccine Responses: A Phase I Randomized Controlled Trial". It provides additional information about reactogenicity (primary), serum antibody (secondary) as well as gene expression (tertiary), cytokine (exploratory), and cell activation (exploratory) outcomes and methods. The study for which this data was collected, was a single center randomized, double-blinded, controlled, Phase I small targeted prospective study in healthy male and non-pregnant female subjects, 19 to 39 years old, inclusive, designed to assess the safety, reactogenicity, immunogenicity, and molecular immune responses of an intramuscular (IM) inactivated monovalent influenza A/H5N1 (Hemagglutinin [HA] of A/Indonesia/05/2005) split-virus (SV) vaccine manufactured by Sanofi Pasteur administered at 3.75 mcg given with the AS03 adjuvant (SV-AS03) manufactured by GlaxoSmithKline (GSK) or Phosphate Buffered Saline (PBS) diluent (SV-PBS). Subjects who met the entry criteria for the study and provided informed consent were randomized 1:1 to SV-AS03 and SV-PBS vaccine and each subject received two doses of the respective vaccine approximately 28 days apart (**Figure A1**). The primary and secondary endpoints of the study were defined as:

### Primary Safety Endpoints:

- Occurrence of vaccine - associated serious adverse events (SAEs) from the time of first vaccination through 13 months after the first vaccination.
- Occurrence of solicited local and systemic reactogenicity in the 8 days (Days 0-7) after each vaccination.

### Primary Immunogenicity Endpoints:

- GMT of HAI antibody, proportion of subjects achieving a serum HAI antibody titer of 1:40 or greater, and frequency of 4-fold or greater increases of HAI antibodies in each group against the subvirion inactivated A/H5N1 virus vaccine approximately 1, 3, 7 and 28 days after receipt of the first dose of vaccine.
- GMT of HAI antibody, proportion of subjects achieving a serum HAI antibody titer of 1:40 or greater, and frequency of 4-fold or greater increases of HAI antibodies in each group against the subvirion inactivated A/H5N1 virus vaccine approximately 1, 3, 7 and 28 days after receipt of the first dose of vaccine.
- GMT of neutralizing antibody, proportion of subjects achieving a serum neutralizing antibody titer of 1:40 or greater, and frequency of 4-fold or greater increases of neutralizing antibodies in each group against the subvirion inactivated A/H5N1 virus vaccine approximately 1, 3, 7 and 28 days after receipt of the first dose of vaccine.

### Secondary Immunogenicity Endpoints:

- GMT of HAI antibody, proportion of subjects achieving a serum HAI antibody titer of 1:40 or greater, and frequency of 4-fold or greater increases of HAI antibodies in each group against the subvirion inactivated A/H5N1 virus vaccine 28 days after receipt of the second dose of vaccine (approximately Day 56).
- GMT of neutralizing antibody, proportion of subjects achieving a serum neutralizing antibody titer of 1:40 or greater, and frequency of 4-fold or greater increases of neutralizing antibodies in each group against the subvirion inactivated A/H5N1 virus vaccine 28 days after receipt of the second dose of vaccine (approximately Day 56).

## **2 Supplemental methods**

### **2.1 Selection of study population**

Twenty healthy male and non-pregnant female subjects, 19 to 39 years old (actual age), inclusive, were enrolled in this study. Subjects were recruited from the community at large at a single Vaccine and Treatment Evaluation Unit (VTEU), Vanderbilt University, and enrolled over a 6-month period.

#### **2.1.1 Inclusion criteria**

Subjects had to meet all of the following protocol-defined inclusion criteria to participate in this protocol:

- Males or non-pregnant females between the ages of 18 and 49 years
- Women of childbearing potential (not surgically sterile via tubal ligation, bilateral oophorectomy or hysterectomy or who were not postmenopausal for  $\geq 1$  year) must agree to practice adequate contraception (that included, but was not limited to, abstinence, monogamous relationship with vasectomized partner, barrier methods such as condoms or diaphragms with spermicide or foam, intrauterine devices, and licensed hormonal methods) during the study for at least 30 days following the last vaccination. Method of contraception was captured on the appropriate case report form (CRF).
- Were in good health, as determined by vital signs (oral temperature, pulse and blood pressure), medical history, and complete physical examination (without genital and rectal exam) to ensure no existing chronic medical diagnoses or conditions were present.
- For women of childbearing potential, negative urine or serum pregnancy test within 24 hours prior to vaccination.
- Were able to understand and comply with planned study procedures.
- Provide written informed consent prior to initiation of any study procedures.



### 2.1.2 Exclusion criteria

Subjects who met any of the following exclusion criteria were excluded from study participation:

- Had a known allergy to eggs or other components of the vaccine (including gelatin, formaldehyde, octoxinol-9, thimerosal and chicken protein), or allergy to squalene-based adjuvants.
- Women who were breastfeeding or planned to breastfeed at any given time from the first vaccination until 30 days after the last vaccination.
- Long term use (defined as taken for 2 weeks or more in total at any time during the past 2 months) of high dose oral or parenteral glucocorticoids (high dose defined as prednisone  $\geq 20$  mg total daily dose, or equivalent dose of other glucocorticoids); or high-dose inhaled steroids (high dose defined as 800 mcg/day of beclomethasone dipropionate or equivalent); or systemic corticosteroids of any dose within the past 4 weeks.
- Had immunosuppression as a result of an underlying illness or treatment, or use of anticancer chemotherapy or radiation therapy (cytotoxic) within the preceding 36 months.
- Had an active neoplastic disease or a history of any hematologic malignancy.
- Had a diagnosis of schizophrenia, bipolar disease, or other major psychiatric diagnosis.
- Hospitalized for psychiatric illness, history of suicide attempt, or confinement for danger to self or others, within the past 10 years.
- Received systemic, prescription medications for the treatment of chronic medical conditions, unless such use is on a PRN (as needed) basis only. Non-PRN use of systemic, over-the-counter medications and PRN systemic, prescription medication may have been allowed if, in the opinion of the investigator, they posed no additional risk to subject safety or assessment of immunogenicity/reactogenicity. Note: Topical, nasal, and inhaled medications, vitamins, and contraceptives were also permitted.
- Received pre-medication with analgesic or antipyretic agents in the 6 hours prior to the first vaccination, or planned medication with analgesic or antipyretic in the week following the first vaccination. This criterion did not preclude subjects receiving such medication if the need arose. However, pre-medication was to be discouraged.
- Received immunoglobulin or other blood products (with exception of Rho D immune globulin) within the 3 months prior to the first vaccination.
- Received any live licensed vaccines within 4 weeks or inactivated licensed vaccines within 2 weeks prior to the first vaccination or planned receipt of such vaccines within 56 days following the first vaccination. This was inclusive of licensed seasonal influenza vaccines.
- Had an acute or chronic medical condition that, in the opinion of the site PI or appropriate sub-investigator, would render vaccination unsafe, would interfere with the evaluation of responses, or is not generally seen in "normal, healthy subjects".
- Had a history of severe reactions following previous immunization with contemporary influenza virus vaccines.

- Had an acute illness, including an oral temperature greater than or equal to 100.4°F, within 3 days prior to the first vaccination.
- Pulse was less than 55 bpm or greater than 100 bpm.
- Systolic blood pressure was less than 90 mmHg or greater than 140 mmHg.
- Diastolic blood pressure was less than 60 mmHg or greater than 90 mmHg.
- Received an experimental agent (vaccine, drug, biologic, device, blood product, or medication) within 1 month prior to the first vaccination or expects to receive an experimental agent, other than from participation in this study, during the 14-month study period.
- Were participating or planned to participate in another clinical trial with a licensed product during the 14-month study period.
- Had any condition that, in the opinion of the site PI or appropriate sub-investigator, would place the subject at an unacceptable risk of injury, or render them unable to meet the requirements of the protocol, or confound the interpretation of results.
- Participated in an influenza A/H5 vaccine study in the past in a group receiving vaccine (did not apply to documented placebo recipients) or have a history of A/H5 infection prior to enrollment.
- Had known active HIV, Hepatitis B, or Hepatitis C infection.
- Had a history of alcohol or drug abuse in the last 5 years.
- Planned to travel outside the U.S. in the time between the first vaccination and 56 days following the first vaccination.
- Had a history of Guillain-Barre Syndrome.

## 2.2 Study visit windows

Study visits of interest and their windows are described in the following ways:

- Day -28 (visit 00A) window: -7, +14 days.
- Day -14 (visit 00B) window:  $\pm 14$  days.
- Day 0 (Visit 1, Dose 1).
- Day 1 (visit 2) window: +1 day.
- Day 3 (visit 3) window: +1 day.
- Day 7 (visit 4) window: +2 days.
- Day 28 (visit 5) window:  $\pm 2$  days.
- Day 56 (visit 7) window:  $\pm 2$  days.

### 2.3 Reactogenicity definitions

Local reactions included pain, tenderness, erythema, and induration. Pain (experienced without touching the injection site) was defined as mild if the subject was aware of pain but it did not interfere with daily activity and no pain medication was taken, as moderate if the subject was aware of pain and it interfered with daily activity or it required use of pain medication, and as severe if the subject was aware of pain and it prevented daily activity. Tenderness (hurts only when injection site is touched) was defined as mild if the area immediately surrounding the injection site hurt only when touched and it did not interfere with daily activity, as moderate if the area immediately surrounding the injection site hurt when touched and it interfered with daily activity, and severe if the area immediately surrounding the injection site hurt when touched and it prevented daily activity. Both erythema (redness) and induration (swelling) were defined as mild if it did not interfere with daily activity, as moderate if it interfered with daily activity, and as severe if it prevented daily activity. Fever was defined as mild if the oral temperature was 38.0-38.4°C (100.4-101.1°F), as moderate if the oral temperature was 38.5-38.9°C (101.2-102°F), and severe if the oral temperature was  $\geq 39^\circ$  ( $\geq 102.1^\circ\text{F}$ ). Systemic reactions included feverishness, chills, shivering, arthralgia (joint pain), asthenia (weakness), malaise (fatigue), myalgia (body aches - not at injection site), headache and nausea. All of the systemic reactions were described as mild if there was no interference with activity, as moderate if there was some interference with activity, and as severe if there was significant interference that prevented daily activity.

Please refer to the study protocol for information about definition and collection of additional safety events including unsolicited adverse events and serious adverse events.

### 2.4 Analysis population

The systems biology analysis population (RNA-Seq, cytokines, cell activation) included all subjects who met all inclusion and exclusion criteria, who contributed at least one pre-vaccination blood sample (at Day -28, -14, or 0) and at least one post-vaccination blood sample (at Day 1, 3, 7, or 28) for which valid results were reported. The analyses included subjects by study product actually received. This population included 20 subjects (10 for each vaccine group randomly labeled A-T) including subject B in the SV-AS03 group, who received the second vaccination (Day 28) out-of-window. Time points with outlying measurements were identified separately for each assay (see following sections for details).

### 2.5 Cytokine/chemokine cytometric bead array methods

Cytometric bead array results below the lower limit of detection (LOD) were imputed using one half of the LOD estimate provided by BD Biosciences (**Table A8**). Concentrations from technical replicates were combined using the mean concentration. Baseline concentration was determined using the mean concentrations among pre-vaccination measurements. A 95% CI for the median cytokine concentration

as well as median fold change from baseline for each time point and vaccine group was obtained using the bootstrap method with 1,000 bootstrap replicates each. In both cases, significance of a shift in distribution for each molecule and study visit day was evaluated using a two-sided exact Wilcoxon Rank Sum test. An individual alpha level of 0.05 was applied in each case.

## 2.6 RNA-Seq methods

### 2.6.1 RNA-Seq experiment

For each study visit day, total RNA was extracted from PBMCs and sorted immune cells ( $< 0.5 \times 10^6$  cells) using the automated Maxwell 16 magnetic particle processor and the Maxwell 16 LEV simply RNA kit (Promega Corp.). RNA was quantified by Quant-iT RiboGreen RNA Assay, and samples were evaluated on the Caliper LabChip GX to assess RNA integrity. 100ng total RNA and RNA integrity numbers greater than 7 were required for proceeding to downstream RNA-Seq applications. Poly(A) mRNAs were isolated using NEBNext magnetic oligo d(T)25 beads. NEBNext mRNA Library Prep Reagent Set for Illumina (New England BioLabs Inc.) was used to prepare individually bar-coded next generation sequencing expression libraries. Libraries were pooled (10mM each sample). Overall, 839 RNA sequence libraries were constructed, one for each subject, cell type and study visit combination with one library (Subject I, T-cell, Day 3) failing due to insufficient RNA. Approximately 25 million, 50-bp, paired-end read sequencing was performed for each library utilizing a 200 cycle TruSeq SBS HS v3 kit on an Illumina HiSeq2000 sequencer (Illumina, Inc.). Sequencing libraries are henceforth also referred to as samples.

### 2.6.2 RNA-Seq data preprocessing

Reference Consortium Human Build 37 (GRCh37) genomic assembly was used as reference sequence. Human gene models and annotations were obtained from the Ensembl database (Version 63, June 2011). Paired-end reads were mapped against the human reference genome using the *TopHat* splice-aware read aligner (Version 2.0.0). Ensembl gene models were used to guide the alignment process. Alignment QC statistics were obtained using the *RSeQC* software (Version 2.3.7). Gene expression quantification was carried out using the *featureCounts* function as implemented in the *Subread* software (Version 1.4.6). *featureCounts* options were set to count fragments, i.e. paired-end reads that reconstitute a fragment for which both ends were successfully mapped to a gene. Reads/fragments that overlapped with multiple genes or had multiple mapping locations on the reference genome were excluded. Systematic sample differences in sequencing depth (number of fragments) were corrected for by calculating RNA composition-robust scaling factors for each sample using the trimmed mean of M-values (TMM) method (Robinson et al. 2010) as implemented in the *edgeR* software (Version 3.2.4). TMM normalization was executed across all 839 libraries for evaluating global biases and outliers, and separately for each cell type excluding outliers for differential analysis. In either case, post normaliza-

tion, 4,185 genes that were known ribosomal, transfer, and mitochondrial RNA genes or genes located on the X or Y chromosomes were excluded to avoid gender-specific effects (**Table A9**) leaving a total of 46,870 genes to be analyzed. For data visualization and multivariate analyses, TMM normalized moderated  $\log_2$  fragment counts per million (LCPM) were computed using *edgeR*. To avoid taking the log of zero values, a TMM-scaled fragment count of 0.5 was added to each gene (the imputed value was different for each sample based on its TMM scaling factor). Genes with less than 1 count per million in 60% of the libraries at any post-vaccination study visit (Days 1, 3, 7, 28) were deemed lowly expressed and were excluded (at a minimum, 8 libraries were required to pass the cut-off). Filtering was carried out for all libraries and separately within cell type, keeping genes that met the cut-off at any post-vaccination day for time-trend analyses. For differential analysis, filtering was carried out within cell type for each post-vaccination study visit sample. **Table A10** lists the number of genes that were retained for each cell type and day. Subject specific  $\log_2$  fold changes from baseline (LFCPM) were calculated for each subject and post-vaccination day (Day 1, 3, 7, 28) by subtracting the mean of the  $\log_2$  baseline values from each of the subject's post-vaccination days.

### 2.6.3 RNA-Seq statistical analysis

**2.6.3.1 Statistical model for identifying differentially expressed genes** Differentially expressed (DE) genes (SV-AS03 vs. SV-PBS) were identified for each post-vaccination day and immune cell type by fitting negative binomial generalized linear models as implemented in *edgeR* (Robinson et al, 2010) (v3.2.4) under the assumption that discrete fragment counts are negative binomial distributed. Trended dispersion estimates based on the mean-variance trend across all genes for a particular cell type and study visit day combination were obtained, and gene-wise negative binomial dispersion parameters were shrunk towards the trended dispersion estimates using the empirical Bayes method as implemented in *edgeR*. For each model, the design matrix included fixed effects for subject, study visit day (baseline or post-vaccination day), and a study visit day x vaccine group interaction term. The study visit day and vaccine group effects had two fixed levels (0: for baseline days -28, -14 or 0, and 1: for the respective post-vaccination day), and (0:SV-PBS and 1:SV-AS03), respectively. The subject effect for estimating subject-specific mean baseline levels was added to account for correlations between samples from the same subject. Maximum likelihood estimates of the coefficients including baseline levels were estimated using the parallelized line search algorithm described by McCarthy et al. (2012). The interaction term represents the  $\log_2$  fold change difference (LFCD) between SV-AS03 and SV-PBS vaccine group responses. The statistical significance of the interaction term was evaluated for each gene using a likelihood ratio test to identify genes that significantly differed in their response from baseline between vaccine groups. To control for testing multiple genes, the false-discovery rate (FDR) based on the Benjamini-Hochberg procedure as implemented in the *p.adjust()* R function was applied. Genes with a FDR-adjusted p-value  $\leq 0.05$  and a fold change of  $\geq 1.5$ -fold (up or down regulation based on LFCD) were deemed to be significantly differentially expressed between vaccine groups.

**2.6.3.2 Determination of significant gene clusters** Pairwise distances between genes based on their baseline  $\log_2$  changes (LCPM) were calculated separately for each cell type and post-vaccination study day (Day 1, 3, 7, 28) and for all study days (Day 1-28). Uncentered Pearson correlation distance was used as distance measure as log fold changes are, by definition, centered around zero. For all these comparisons, the list of genes included genes that were differentially expressed for a certain cell type at any of the post-vaccination days. Clusters were obtained using the hierarchical complete linkage clustering algorithm. To evaluate robustness of gene clusters, multiscale bootstrapping (Suzuki and Shimodaira, 2006) was carried out separately for each cell type and post-vaccination day using varying dataset sizes ( $0.4*N$ ,  $0.5*N$ ,  $0.6*N$ ,  $0.7*N$ ,  $0.8*N$ ,  $0.9*N$ ,  $1*N$ ,  $1.1*N$ ,  $1.2*N$ ,  $1.3*N$ ; where N stands for the respective dataset size). For each dataset size bin, 1,000 bootstrap samples were obtained, and bootstrap probabilities and p-values were calculated. A p-value cut-off of 0.05 was applied for lymphocytes (B-cells, NK-cells, and T-cells), and 0.01 for neutrophils, dendritic cells, and monocytes when determining significant clusters to reduce the impact of false-positives for the latter group with many more differentially expressed genes. In either case, the maximum distance to form a significant cluster was set to 0.5 (equivalent to minimum uncentered Pearson correlation of 0.5). Clusters that were formed at larger distance were excluded.

**2.6.3.3 Gene set enrichment analysis** Gene set enrichment analysis was carried out separately for each time point and cell type. Genes were grouped and analyzed based on 8,101 known gene sets obtained from the KEGG database (Version 70.0, 06/09/2014) and MSigDB (Version 4.0, 05/31/2013). The KEGG subset included KEGG pathways and KEGG modules. The MSigDB gene set collection comprised GO Biological Processes, GO Cellular Components, GO Molecular Functions, Reactome Pathway, BioCarta Pathway, Chemical/Genetic Perturbations, and Immunologic Signature gene sets. **Table A73** summarizes the gene set collection used in this report. For each of these gene sets, enrichment was evaluated using the *goseq* R package (Version 1.12.0). The GOseq algorithm adjusts for gene length bias when modeling the null distribution (Young et al., 2010). Gene length was specified as the length of the longest cDNA of a gene. Gene length information was obtained from the *tweeDEseq-CountData* R package (Version 1.0.9). GOseq probability weighting functions were estimated for each cell type and post-vaccination study day based on differentially expressed genes. Null distributions were generated using GOseq's random sampling option (100,000 randomizations were applied). Lists of enriched gene sets were obtained separately for each of the nine category types (KEGG pathways, KEGG modules, GO Biological Processes, etc.). To adjust for testing multiple gene sets per category type, the Benjamini-Hochberg procedure as implemented in the *p.adjust()* R function was applied to each list. Gene sets with a FDR-adjusted p-value  $\leq 0.01$  were considered to be significantly enriched. Enrichment trends across study visit days and cell subsets were visualized using heatmaps and binary Jaccard-distance based complete-linkage hierarchical clustering. For significantly enriched KEGG pathways, pathways were color-coded by  $\log_2$  fold change between vaccine groups. If nodes in the pathway referred to multiple genes, the median  $\log_2$  fold change was used to set the background color

of a node (red: up-regulated in the SV-AS03 group compared to the SV-PBS group, green: down-regulated in the SV-AS03 group compared to the SV-PBS group). If one of the genes of a multi-gene node was significantly enriched, the node label and border was color-coded (red: up-regulated, green: down-regulated, blue: conflict if one gene was up but another was down regulated).

**2.6.3.4 Protein-protein interaction network integration** Ensembl gene IDs were used to obtain UniProt IDs and gene symbols using the UniProt ID mapping tool (<http://www.UniProt.org/uploadlists>). Human-human and human-*Influenza A* protein-protein interactions were downloaded from the IntAct database (<http://www.ebi.ac.uk/intact/>) using the following IntAct search term: (taxidA: 9606 AND taxidB: 9606) OR ((taxidA: 9606 AND taxidB: 197911) OR (taxidB: 9606 AND taxidA: 197911)). The resulting dataset contained 109,291 interactions in MITab27 format and was downloaded 01/14/2015. For a certain cell type and study visit day, this network was filtered for nodes with a network distance of 1 to a protein encoded by a significant gene were retained (i.e., at least one of the interacting proteins had to be encoded by a significant gene). Protein-protein interaction network visualizations were generated using the *Cytoscape* software package (Version 3.1.1). An additional filter requiring two distinct publications to report a human-human interacting protein pair was used to reduce network complexity if needed (in this case, human-*Influenza A* protein interactions with a single publication were still included).

**2.6.3.5 Regularized canonical correlation analysis** To identify combinations of gene responses that best correlate with changes in cytokine, chemokine, and antibody responses, regularized Canonical Correlation Analysis (RCCA) was carried out for each cell type, post-vaccination time point, and vaccine group combination using the *mixOmics* R package (Version 5.0-3). RCCA identifies linear combinations within two variable sets that maximize the inter-set correlation, here, the correlation between genes and immunogenicity outcomes. The gene variable set was based on log fold changes (LFCPM) and included genes with an average absolute baseline fold change of  $\geq 1.5$  in at least one of the two vaccine groups (group 1: SV-AS03, group 2: SV-PBS). The immunogenicity variable set (referred to as IMO variable set) included baseline log fold changes of cytokine concentrations (up-to 12 cytokines: Interferon gamma (IFN- $\gamma$ ), Interleukin-1 beta (IL-1 $\beta$ ), Interleukin-12 p70 (IL-12p70), Interleukin-6 (IL-6), Interleukin-8 (IL-8), Tumor necrosis factors (TNF), Interleukin-10 (IL-10), Interferon gamma-induced protein 10 (IP-10), Monocyte Chemoattractant protein-1 (MCP-1), Chemokine (C-C motif) Ligand 5 (RANTES), Eotaxin-1 (Eotaxin), Macrophage inflammatory protein (MIP-1 $\alpha$ ), as well as baseline log fold changes of antibody titers (hemagglutination inhibition (HAI), and microneutralization inhibition (Nt) assays). Interleukin-1 alpha (IL-1 $\alpha$ ) and, Lymphotoxin-alpha (LT- $\alpha$ ) were excluded for all cell types and post-vaccination days as no changes from baseline were observed.

A regularization step was included to avoid overfitting and handle collinearity within variable sets. Regularization parameters ( $\lambda_1$  and  $\lambda_2$ ) were estimated using leave-one-out cross validation (grid-search of

40,000 parameter combinations ranging from 0.00001 to 1 in 200 increments). The top two canonical variate pairs that maximize inter-set canonical correlation were identified. Correlations between original variables (Pearson correlation) and corresponding canonical variates were calculated (canonical loadings). Canonical loadings were squared to obtain the percent-explained variance for each variable. Except for high level summaries, RCCA results with a cross-validation score of  $< 70$  were excluded from tabular and graphical summaries.

Canonical loadings for each variable set were visualized for the first two canonical variates using 2-dimensional canonical correlation circle plots. Gene and IMO variables for which the first two canonical variates explained less than 25% of their total variance (placed within the inner circle of the correlation circle plots) were grayed out. Variables or groups of variables that are closely positioned in these plots are positively correlated while those diametrically opposed are negatively correlated. The strength of the correlation is encoded by the distance from the center of the circle as well as by the angle between variables when viewed as vectors originating from the center. A sharp angle between variables represents a positive correlation, an obtuse angle indicates a negative correlation while a right angle is observed for zero correlation. Thus, maximum correlation is achieved when variables are closely placed together to the outer circle (or directly opposed on the outer circle). KEGG BRITE pathway hierarchy (second level) information for the top five pathway categories (in terms of number of genes that were correlated) was overlaid on top of the correlation circle plots to highlight known functional organization. Identified robust gene clusters (see **Section 2.6.3.2**) were integrated by connecting correlated genes that formed a robust gene cluster. Correlation results between vaccine groups were contrasted by plotting canonical loadings for the SV-AS03 group against those obtained for the SV-PBS group.

**2.6.3.6 Regularized logistic regression** For each cell type, a regularized logistic regression model was fit to identify Day 1 gene responses that are correlated with seroprotection as defined by a HAI antibody titer of  $\geq 1:40$  at Day 56 using the *glmnet* R package (Version 2.0-2). The predictor variable set was based on log baseline fold changes (LFCPM) and included genes with an average absolute fold change from baseline  $\geq 1.5$  in at least one of the two seroprotection response groups (group 1: HAI  $\geq 1:40$ , group 2: HAI  $< 1:40$ ). To avoid overfitting ( $n \ll p$  and collinearity among gene responses) and facilitate variable selection, an elastic net regularization step (combination of L1 Lasso and L2 ridge penalization,  $\alpha = 0.5$ ) was included as part of the fitting procedure. Leave-one-out cross validation was used to determine the optimum regularization parameter  $\lambda$  that minimizes the misclassification error between seroprotection response groups.



## **2.7 Flow cytometric immune cell phenotyping and activation methods**

### **2.7.1 Flow cytometric immune cell phenotyping and activation data processing**

After gating live cells, individual cell types were gated sequentially: 1) CD15+ neutrophils and CD3+ T cells; 2) from the CD15-CD3-, CD19+ B-cells and CD14+ monocytes; 3) from the CD15-CD3-CD19-CD14- fraction, CD11c dendritic cells and CD56+ NK-cells were gated. The percentage of each cell type in whole blood was calculated using the following formula: # of gated cell events/# of total live events. The number of each cell type/mL of whole blood was calculated by multiplying the percentage of each cell type by the concentration of blood cells in the whole blood sample. The FMO gates for activation marker expression were set to contain the same percentage of events across each cell type and activation marker on a per-subject basis, excluding obvious outliers. This value was based on the number of events contained in each cell type gate. For the whole blood samples, the values were as follows:

- 99.9% for samples with >20,000 events (most neutrophil samples, a few T-cell samples)
- 99.8% for samples with 10,000-20,000 events (most T-cell samples, a few neutrophil samples)
- 99.5% was used for medium cell populations, containing 500-5,000 events (B-cell, monocyte, and some NK-cell samples)
- 99.0% was used for small cell populations containing less than 500 events (dendritic cells and some NK-cells)

These gates were then copied from the FMO sample to the corresponding cocktail sample, and cells outside of the FMO gate were considered "expressing cells". The percentage of expressing cells was calculated for each cell type using the following formula: # of activated cells/# of cell type population. Percentages of expressing cell obtained for whole blood samples for each of the 3 markers (CD134, CD69, CD86) and 6 cell types (T-cells, neutrophils, monocytes, B-cells, dendritic cells, and NK-cells) were used for downstream analyses.

### **2.7.2 Flow cytometric immune cell activation outlier detection and normalization**

The percentages of expressing cells for the whole blood samples were inspected for potential outliers using univariate (boxplots) and multivariate methods (non-metric multidimensional scaling biplots). Boxplots were generated for each cell type and marker combination summarizing the percentage of expressing cells across all samples (i.e. all subject and time point combinations) with non-missing values. Non-metric multidimensional scaling biplots were generated for each marker. Subject and time point combinations (samples) were represented by a multivariate vector that included all 6 cell type measurements (only samples for which percentages for all six cell types were recorded were included in this analysis). Pairwise distances between samples were then calculated using the Euclidean distance.

Following outlier removal, correlation between detector settings and percent cell activation was evaluated for each marker and cell type using scatter plots as well as Pearson and Spearman correlation metrics. Normalization for a subset of marker and cell type combinations was carried out as follows:

- (1) a linear regression model was fit to obtain slope and intercept coefficients that together describe the mean trend
- (2) the center of the detector range was obtained by calculating the mean between the minimum and maximum reported detector setting
- (3) the estimated mean percentage of expressing cells at the center of the detector range (2) was calculated based on the regression fit obtained in (1)
- (4) the estimated mean percentage of expressing cells for each observation was calculated based on the respective detector setting and the regression fit obtained in (1)
- (5) a scaling factor for each observation was then calculated as the ratio between the estimated mean percentage of expressing cells at the center of detector range (3) and the estimated mean percentage of expressing cells based on the detector setting for each observation (4)
- (6) the percentage of expressing cells for each observation was then normalized by multiplying it with its corresponding scaling factor

The impact of normalization and potential association with vaccine group and study visit day was visually inspected using scatter plots. In addition, scaling factor distributions for the two vaccine groups were compared for each marker and cell type combination using a two-sided non-parametric Wilcoxon Rank-Sum test. Scaling factor distributions between the seven study visit days were compared using a non-parametric two-sided Kruskal-Wallis Rank-Sum test.

## 2.8 Software

Data was analyzed using the *R statistical programming language* and *R Bioconductor* packages. A complete listing of R and package versions are given in **Table A165**. This report was generated using the *knitr* R package (Version 1.5) and *LaTeX* typesetting software (Version TeX Live 2012/Debian). The operating system used was *Ubuntu* (Version 13.04).

## 3 Supplemental results

Demographic and baseline characteristics for the analysis population are summarized in **Table A1**. Overall, the majority of subjects were female (55%), and all subjects were non-Hispanic and White. A greater percentage of subjects in the SV-PBS study group were female (70%) than in the SV-AS03 group (40% female). Ethnicity and race distributions were similar across groups. The mean age for all subjects was 28.3 years (range: 19.3 to 39.3 years), with a median age of 27.6. The median age for the SV-AS03 group was 26.1 years, and the median age for the SV-PBS was 29.1 years of age.

### 3.1 Safety and immunogenicity results

A summary of local and systemic reactions by severity and study arm is given in **Figure A2** and **Tables A2 and A3**. HAI and Nt titer statistics for the intent-to-treat and per-protocol populations are listed in **Table A7**.

#### 3.1.1 Local and systemic reactogenicity

No subjects reported severe solicited local or systemic reactions during the 8-day post-vaccination period for either dose. Following the first vaccination, 2 subjects (20%) reported moderate and 7 subjects (70%) reported mild solicited local reactions in the SV-AS03 group, while 4 subjects (40%) reported mild local reactions in the SV-PBS group, and no subjects reported moderate local reactions in the SV-PBS group (**Tables A2 and A3**). The most frequently reported local reactions were injection site pain and tenderness. One subject (10%) reported moderate and 5 subjects (50%) reported mild solicited systemic symptoms during the 8 days post vaccination 1 in the SV-AS03 group. Two subjects (20%) reported moderate and 2 subjects (20%) reported mild systemic symptoms in the SV-PBS group. The most frequently reported systemic symptoms following both vaccinations were headache and malaise (**Tables A2 and A3**).

#### 3.1.2 Adverse events

Two unsolicited AE occurred in the SV-AS03 group; both AE were classified as 'mild' and unrelated to vaccination. Seven unsolicited AE occurred in the PBS group; one (neck pain classified as 'mild' was considered related to vaccination and resolved within 24 hours. Six of the unsolicited AE in the PBS group were classified as 'mild', while one event was classified as 'moderate' (upper respiratory infection). No severe AE or new-onset chronic medical conditions occurred in either study group.

### 3.2 Cytokine/chemokine cytometric bead array results

Time trends for median cytokine/chemokine concentrations as well as baseline fold changes with corresponding 95% CIs are shown in **Figures A3 to A16**.

### 3.3 RNA-Seq results

#### 3.3.1 Reference alignment statistics

**Tables A11 and A12** summarize key technical variables and alignment statistics. On average, 56.2 million reads were mapped for each sample against the reference, out of which, 83.4% uniquely mapped to a location on the human reference assembly. Paired-end reads that mapped to different chromosomes were hardly existing (only 4 cases were reported overall). When mapped against known gene

models, on average, 16.7 million fragments (combined paired reads that mapped to the same gene) were uniquely counted in the expression quantification step. Sample mean %GC content of mapped sequences ranged from 47% to 54%. The number of Illumina flow cells per library/sample ranged from 1 to 7 with 1-15 lanes per sample (on average 3 flow cells and 10 lanes).

The vast majority (on average 81.7%) of tags (spliced reads) mapped to known<sup>1</sup> exon regions followed by intronic (16.6%), and intergenic regions (1.8%). Coverage for coding DNA sequence regions was, on average, 485 tags per Kb of sequence, compared to 6.6 tags per Kb for introns, and a maximum of 3.34 tags per Kb for intragenic regions (10Kb up/downstream). For most of the detected splice junctions (90.9% on average), both splice sites were part of the gene models with a small fraction (2.5%) for which neither of the two splice sites were reported, indicating that the applied gene model captured nearly all of the splicing junction information in the data. For a newer version of Ensembl<sup>2</sup>, the average percent of known splice junctions was 91.4%. The small increase (0.5%) in known junctions implied that recent gene model additions did not substantially improve coverage of identified junctions.

Boxplots of subsets of these statistics by cell type are given in **Figures A17 and A18**. Overall, neutrophils showed the most distinct patterns with higher FACS cell counts, a higher proportion of uniquely mapped reads, a higher number of tags for the 3' untranslated region, an overall lower number of reads spanning splicing junctions, and among those, the highest fraction of novel junctions compared to the other cell types. Dendritic cells had comparatively low FACS cell counts compared to the rest. B-cells, as for neutrophils, had a higher fraction of novel splicing junctions. B-cells also had a comparatively high percentage of intergenic tags. Dendritic cell and monocyte samples contained a higher percentage of tags that mapped against known exon regions.

Starplots that visualize alignment statistics across cell types, time points, and vaccine groups are shown in **Figures A19 to A24**. Most variation was observed between cell types with more homogeneous across-sample profiles for B-cells, dendritic cells, and NK-cells. Although subject-specific patterns were observed (e.g. subject D for dendritic cells or Q and C for neutrophils), no strong effects related to vaccine group or study visit day were evident.

### 3.3.2 Impact of TMM normalization

TMM normalization reduced sample-to-sample variation with improved alignment of  $\log_2$  counts per million within cell types (**Figures A25 to A27**). Neutrophils showed distinct distributional properties compared to the other cell types, with higher variation and a lower median. This observation was due to a higher fraction of lowly expressed genes when compared to the other five cell types (**Figure A27**).

<sup>1</sup>Ensembl gene models (Version 63, June 2011)

<sup>2</sup>Ensembl gene models (Version 74, December 2013)

These neutrophil-specific distributional properties were consistently observed before and after normalization and across time points, pointing towards a different RNA composition for neutrophils. At Day 28, two samples showed outlying profiles: (1) sample [subject B, B-cells, day 28] with a distributional profile more similar to that of neutrophils, and (2) sample [subject J, dendritic cells, day 28] with very low  $\log_2$  counts per million.

### 3.3.3 Global gene expression patterns, confounding effects, and outlying samples

Principal component analysis of the original and standardized gene variables [ $\log_2$  counts per million] revealed that most of the total variation in gene expression was attributable to cell type (**Figure A28**) with three distinct cell clusters: (1) neutrophils, (2) lymphocytes (T-cells, B-cells, NK-cells), and (3) dendritic cells/monocytes. This finding was further confirmed by patterns observed when visualizing the data using non-metric multidimensional scaling, hierarchical clustering, and heatmap plots - all of which showed a strong separation of samples by cell type (**Figures A29 to A31**). Analysis of variance of the first two Principal Components identified cell type as a major source of total variation, followed, to a much smaller extent, by variability introduced by subjects (**Tables A17 and A18**). Study visit day did not play a significant role in describing total variation. This observation was also evident when plotting the first Principal Component against each of these factors (**Figure A36**).

Overall explained variance in gene expression ranged from 45.1% to 52.2% for the first Principal Component (PC1) and 17.2% to 21.6% for the second Principal Component (PC2). Among cell types, the major drivers (PC1, x-axis) were neutrophils to the right and lymphocytes (T-cells, B-cells, NK-cells) to the left. The second major trend (PC2, y-axis) was observed for the dendritic/monocyte cluster at the top versus the rest at the middle/bottom of the spectrum.

99.6% bivariate confidence ellipses indicate the boundaries for each cell type cluster outside of which one would expect 0.5 outliers (given the number of samples per cell type assuming a bivariate t-distribution). Among the 839 samples, two extreme outliers far beyond their respective boundaries were observed: (1) sample [subject J, dendritic cells, day 28] and (2) sample [subject B, B-cells, day 28] (**Figure A28**). These samples were already identified based on their outlying univariate  $\log_2$  distributions. Sample [subject B, B-cells, day 28] appeared to have been wrongly labeled as a B-cell sample as its expression profile was most similar to that of neutrophils. For both of these samples, experimental issues in the corresponding FACS experiment were recorded. PCA and non-metric multidimensional scaling biplots that focus on the plot region for each cell type are given in **Figures A32 to A34**. Eight additional samples including three baseline samples were flagged as strong outliers based on their placement compared to other cell type samples (blue circles). Samples belonging to subject H (Day -28, highlighted in red) exhibited moderately outlying patterns for dendritic cells, monocytes, and NK-cells. This observation was further inspected by plotting the difference between maximum and

minimum Spearman correlation between  $\log_2$  counts per million of baseline samples for each subject (**Figure A35**). The baseline correlation analysis confirmed the 3 flagged baseline outliers identified earlier. In addition, the boxplots showed subject H (Day -28) as an outlier for 4 cell types (dendritic cells, monocytes, NK-cells, and neutrophils). Inspection of the laboratory data showed that a very low PBMC count ( $106 \times 10^6$  total cells) after initial fractionation of the whole blood was obtained for this subject and time point. Based on these findings, it was decided to flag these four baseline samples as additional outliers. A listing of all outliers and issue records are provided in **Table A19**. Outlying samples were removed from downstream analysis.

Spearman correlations between technical and gene model variables with the first two Principal Components before and after normalization are summarized in **Tables A13 and A16**. Results for the first Principal Component (PC1) are described here. Correlations were very similar for the original and normalized data with strong associations with percent uniquely mapped reads and the number of splicing junctions. As shown earlier, both of these variables, when inspected across cell types, showed distinct patterns for neutrophils (**Figures A17 to A18**). As PC1 mainly explained the difference between neutrophils and the rest of the cell types, it is expected to see higher correlations for these neutrophil-associated variables. Correlation results tabulated separately by cell type are given in **Tables A21 to A32**. While the association with percent uniquely mapped reads and number of slicing junctions was greatly reduced, cell specific expression components showed much stronger correlations with sample mean %GC content (**Figure A37**). Example genes that were highly correlated were identified and the relationship was visualized in **Figure A38**. Wilcoxon Rank Sum tests showed that %GC content did not significantly differ between vaccine groups.

### 3.3.4 Multiple time points to measure baseline expression

As for the complete sample set (**Figure A28**), at baseline, most variation was driven by cell type with distinct clusters for lymphocytes, dendritic cells/monocytes, and neutrophils (**Figure A39**). To evaluate factors that drive baseline variability (Day -28, -14, and 0), two ANOVA models were fit separately for the first two Principal Components. Models were fit across all cell types and separately by cell type. For both Principal Components, for the combined set, most of the total variance was explained by cell type, which was significant (**Tables A33 and A34**). The subject factor was significant as well but explained much less of the total variation. The study day factor was non-significant. Per-cell type ANOVA results showed that between-subject variability was significantly larger than within-subject variability for all six immune cell types and for both Principal Components (**Tables A35 and A46**). These trends were also evident when plotting factor distribution against the 1st Principal Component for each cell type (**Figure A40**). Genes with high baseline variability based on Pearson correlation with the 1st Principal Component are listed in **Tables A47 to A52**.

To evaluate the impact on fold change estimates, we compared genes with mean baseline fold changes  $\geq 1.5$  (up or down) when using all three baseline measures compared to one or two baseline measures in the group that received the SV-AS03 vaccine at day 1 and 3 post-vaccination (**Table A53**). The average sensitivity was 0.85 and 0.86 when using one or two baseline measures, respectively. That is 85-86% of genes identified when using three baseline measures were also identified when using one or two baseline measures. The average false discovery (proportion of non-matching genes) was 0.4 for the set based on a single baseline measure but was greatly reduced (to 0.18) when including a second baseline measure (**Table A53**). These results show that inclusion of additional baseline measures resulted in increasingly conservative and consistent fold change estimates reducing the impact of transient baseline signals.

### 3.3.5 Adjustment of global GC content bias

The observed strong association between expression pattern components and sample %GC content indicated that %GC plays a substantial role in modulating  $\log_2$  fragment counts per million. To evaluate the potential impact on the vaccine group effect (log fold change difference between SV-AS03 vs. SV-PBS group), negative binomial models were fit with and without sample-specific %GC added as a covariate and the LFCD was estimated. Under the assumption that most genes are not DE and GC content does not have a biasing influence on the vaccine group effect, the global center of the estimated fold change differences is expected to be zero. Any deviation from this pattern would indicate a systematic bias. **Figures A41 to A46** show the estimated  $\log_2$  fold change differences (SV-AS03 vs. SV-PBS group) plotted against gene-specific %GC content before and after correcting for % sample GC content (first two columns). The two columns to the right show MA plots with  $\log_2$  fold change differences (SV-AS03 vs. SV-PBS group) plotted against  $\log_2$  average counts with genes colored according to their GC content (in red:  $>60\%$ ) and (in blue:  $<40\%$ ). Generally, none or slight effects were observed (e.g. B-cells Day 1, monocytes Day 28). However, strong bias of  $\log_2$  fold change was observed for B-cells at Day 28 (**Figure A41**), Neutrophils at Day 1 (**Figure A44**), and NK-cells at Day 1 (**Figure A45**). In each case, inclusion of sample % GC content as a covariate corrected the bias reestablishing the center of fold change difference at zero and random pattern for high/low GC genes. Venn diagrams that summarize the overlap in the number of significant genes across post-vaccination days before and after GC correction are shown in **Figures A53 and A54**. Negative binomial dispersion trends of GC content-adjusted models by cell type and study visit combination and MA plots with significant genes highlighted are shown in **Figures A47 to A52**.

### 3.3.6 Response time trends of differential genes and gene clusters

Genes significantly differentially expressed for at least on post-vaccination day per cell type were evaluated for time, subject, and correlated gene patterns. **Figures A55 to A78** present heatmaps with

genes and subjects clustered by their fold change profile (based on uncentered Pearson correlation and complete linkage clustering). GC-adjusted  $\log_2$  fold change between vaccine groups for Days 1-28 are shown in **Figures A79 to A84**.

**Tables A58 to A71** list gene clusters that were found to form significant clusters determined by multi-scale bootstrap resampling. Dendrograms with bootstrap probabilities and gene cluster highlights are summarized in **Figures A85 to A97**. Gene cluster results were integrated with baseline  $\log_2$  fold change heatmaps (**Figures A55 to A78**). To further investigate the relationship between genes over time, per-subject  $\log_2$  fold changes from baseline were plotted for each significant cluster (**Figures A101 to A105**).

### 3.3.7 Gene set enrichment results

Gene set enrichment analysis was carried out for each cell type study visit day combination using published gene sets outlined in **Table A73**. Except for MSigDB Immunologic Signature and Chemical/Genetic Perturbation gene sets, typically less than half of significant genes were mappable to known gene sets (**Table A74**). Coverage for Chemical/Genetic Perturbations and Immunologic Signatures gene sets ranged between 82% and 100%. Taken together, this indicates that most of the differential genes in this study have biological functions (by responding to certain external stimuli) but a major proportion are not well characterized or annotated.

Significantly enriched gene sets for MSigDB Reactome and Immunologic Signatures sets are listed in supplemental tables S3 and S6 (not in this report). Significantly enriched gene sets for the other seven category types are given in **Tables A75 to A111**. Trends across cell types and time points for gene sets that were significantly enriched in at least two conditions are shown in **Figures A112 to A117**. KEGG pathway maps color-coded by expression fold change and fold change significance are shown in **Figures A118 to A137**.

### 3.3.8 Protein-protein interaction networks

Networks of experimental protein-protein interactions centered around significantly differentially expressed genes for each cell type and post-vaccination day are shown in **Figures A138 to A146** (nodes are colored by fold change between vaccine groups).

### 3.3.9 Gene responses correlated with changes in serum cytokine/chemokine, or antibody concentration

Regularized canonical correlation analysis was carried out to identify subsets of genes (Gene variables) that, based on their log fold change from baseline, maximize correlations with subsets of cytokine and



antibody responses (IMO variables). Summary statistics, including number of variables for each set, cross validation score, canonical correlations, and average explained percent variance for the first two canonical variates by cell type are listed in **Tables A112 to A117**. Canonical loadings and percent explained variance for each variable are given in **Tables A118 to A159**. Correlation circles summarizing associations between variable sets based on the first two canonical variates are shown in **Figures A148 to A168**. Graphical contrasts between vaccine groups are given in **Figures A169 to A177**. **Section 2.6.3.5** provides information on how to interpret correlations between variable based on their 2-dimensional placement in these graphs.

### 3.3.10 Gene responses that differentiate between seroprotection status

A regularized logistic regression model was fit for each cell type to identify combinations of Day 1 gene responses that best differentiate between seroprotection status. **Table A160** summarizes regularized logistic regression model statistics including the number of subjects by seroprotection status, as well as minimum cross-validated mean misclassification error (MME) for each model.

## 3.4 Flow cytometric immune cell phenotyping and activation results

Spider plots that summarize median fold changes in the percentage of live cells as well as cell concentration (#cells/mL) for each immune cell type are shown in **Figures A212 to A213**, respectively. Corresponding median values are listed in **Tables A161 to A162**.

Detector settings for activation marker detection changed daily during the study. Although data were corrected for these changes, results presented below should be treated with caution. The data is provided for completeness so that they can be confirmed in the context of future cell activation studies.

Of the 140 samples assayed (20 subjects and 7 time points), complete measurements, i.e. measurements for all 3 markers (CD134, CD69, CD86) and 6 cell types, were obtained for 129 samples: 7 samples were missing all measurements and 4 samples were missing some of the measurements. For 52 of the samples, experimental issues including detector changes were recorded.

Boxplots of percentage of cell activation for each marker and cell type are shown in **Figures A178 to A180**. Non-metric multidimensional scaling biplots are given in **Figure A181**. Based on these plots and in combination with reported experimental issues, 35 measurements obtained for 14 samples were flagged as outliers and were removed from downstream analyses.

Correlation between detector settings and percent cell activation before and after normalization was evaluated for each marker and cell type combination using scatter plots as well as Pearson and Spear-

man correlation metrics. **Figures A182 to A193** show results for CD69, CD86, and CD134, colored by vaccine group or study visit day. CD69 showed the strongest linear (Pearson) correlation between detector settings and percentage of cell activation (T-cells and NK-cells: 0.47, B-cells: 0.41, Dendritic cells: 0.38, monocytes: 0.19, and neutrophils: 0.1; **Figures A182 to A183**). Except for neutrophils, all CD69 correlations were statistically significant. Observed linear correlations for CD134 were weaker and, if a trend was observed, were negative, i.e. the percentage of cells expressing CD134 decreased with increasing detector settings (**Figures A190 to A191**). Significant CD134 correlations were observed for T-cells (-0.26), monocytes (-0.23), and dendritic cells (-0.27). Non-significant correlations were reported for neutrophils (0.04), B-cells (-0.05), and NK-cells (-0.14). CD86 did not show any significant linear associations between detector settings and percent expressing cells (**Figures A186 to A187**). Visual inspection of CD69 and CD134 scatterplots before and after normalization did not show strong detector setting-specific groupings by vaccine group or study visit day. In all these cases, Wilcoxon Rank-Sum test results to evaluate distribution shifts between normalization scaling factors for the two vaccine groups were not statistically significant (**Figures A182 to A185** and **Figures A190 to A193**). The same was true when comparing scaling factor distribution between study visits using a Kruskal-Wallis Rank-Sum test. For the following cell type combinations, normalized values were used for downstream analyses: T-cells (CD69 and CD134), monocytes (CD69 and CD134), dendritic cells (CD69 and CD134), NK-cells (CD69 and CD134), B-cells (CD69).

**Figures**

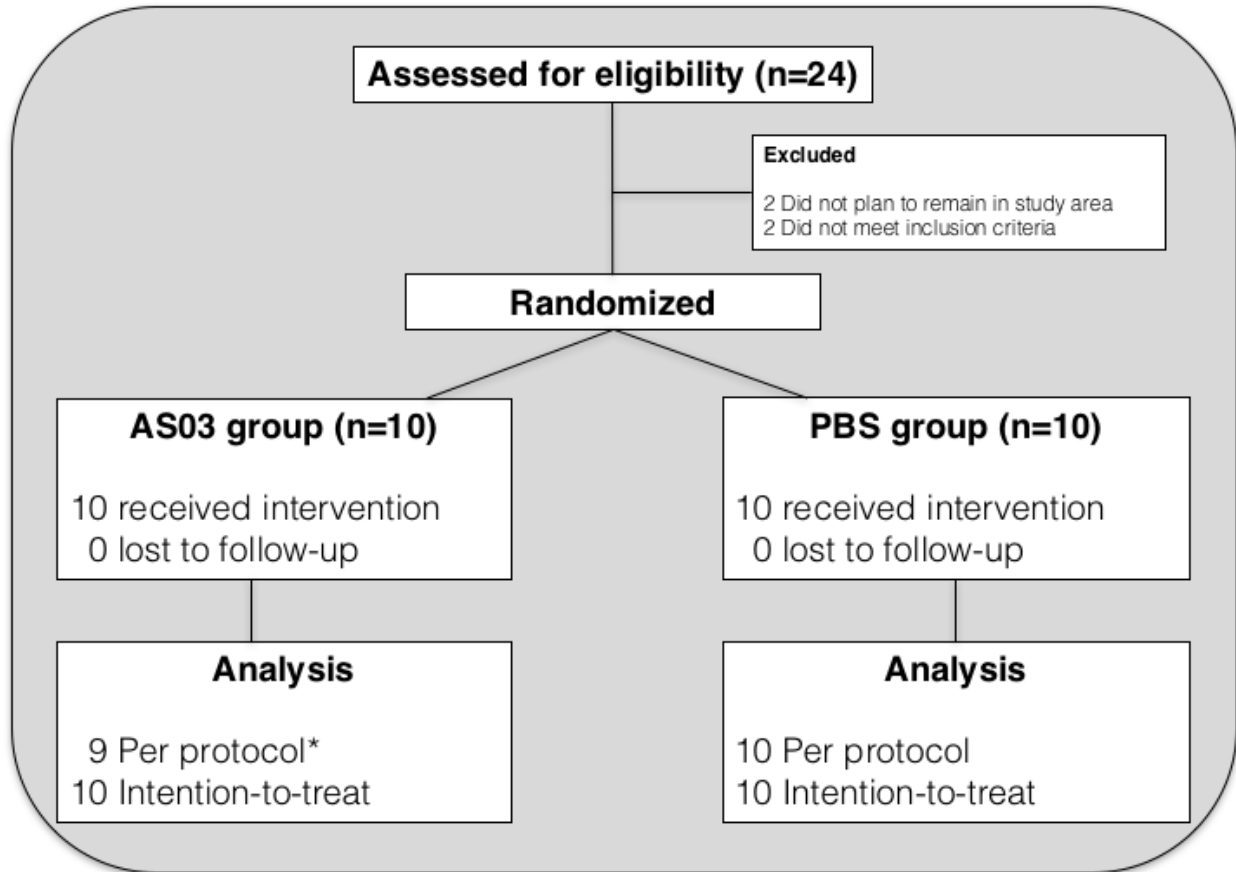

\* One subject received Vaccine Dose 2 on Study Day 39 (9 days outside of window)

**Figure A1:** Consort diagram outlining study group enrollment and randomization.

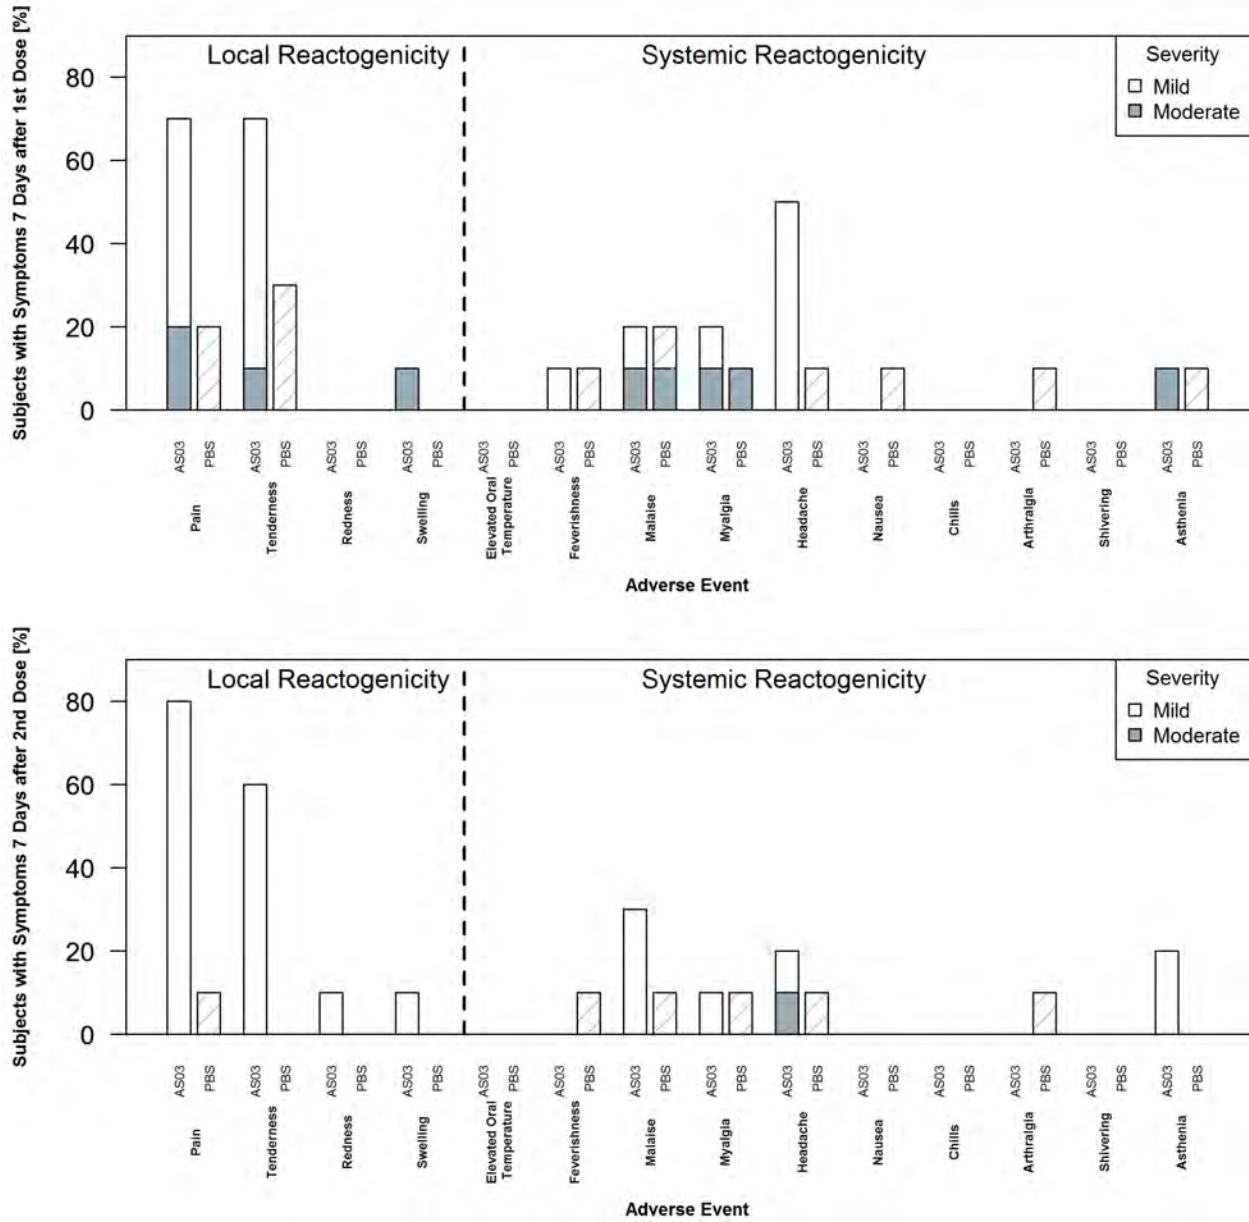

Figure A2: Local and systemic reactogenicity by severity and study arm.

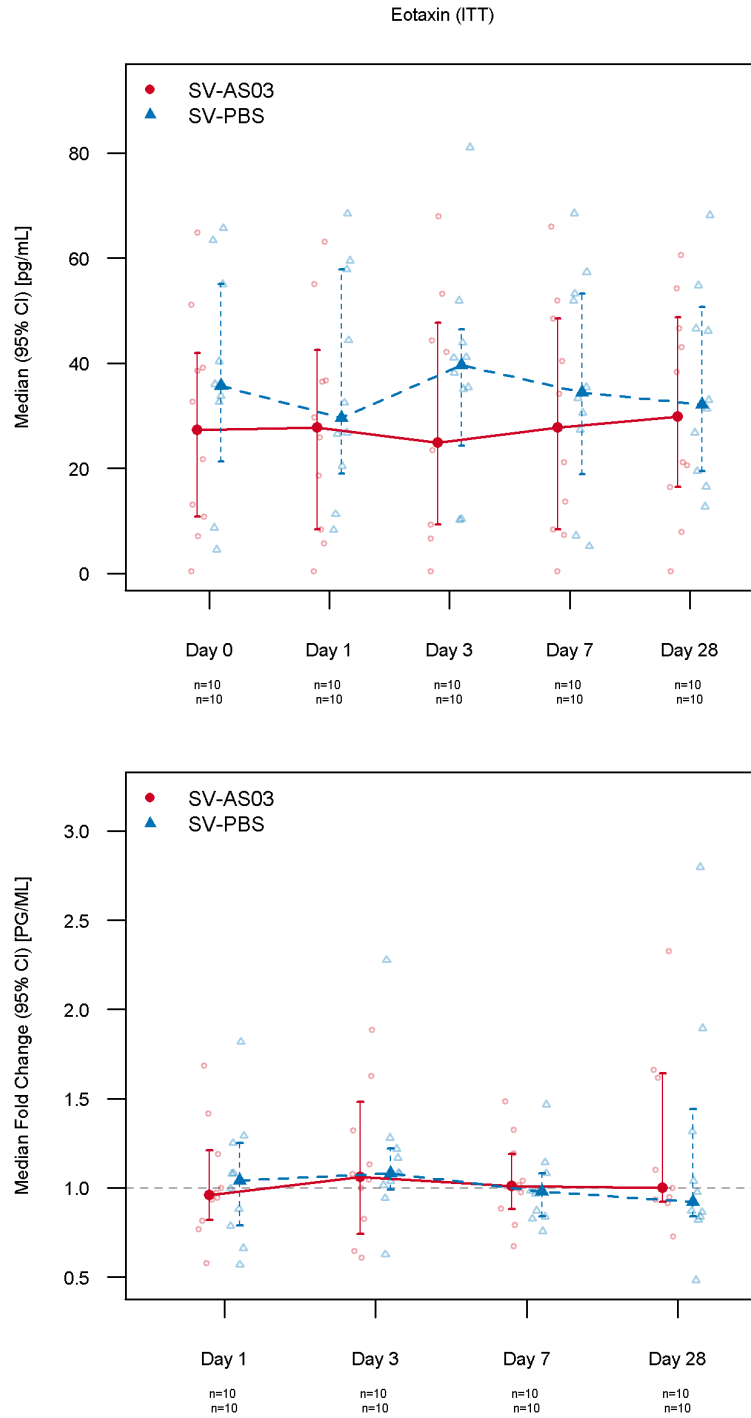

**Figure A3:** Eotaxin-1 (CCL11) Median Concentration and Baseline Fold Change.

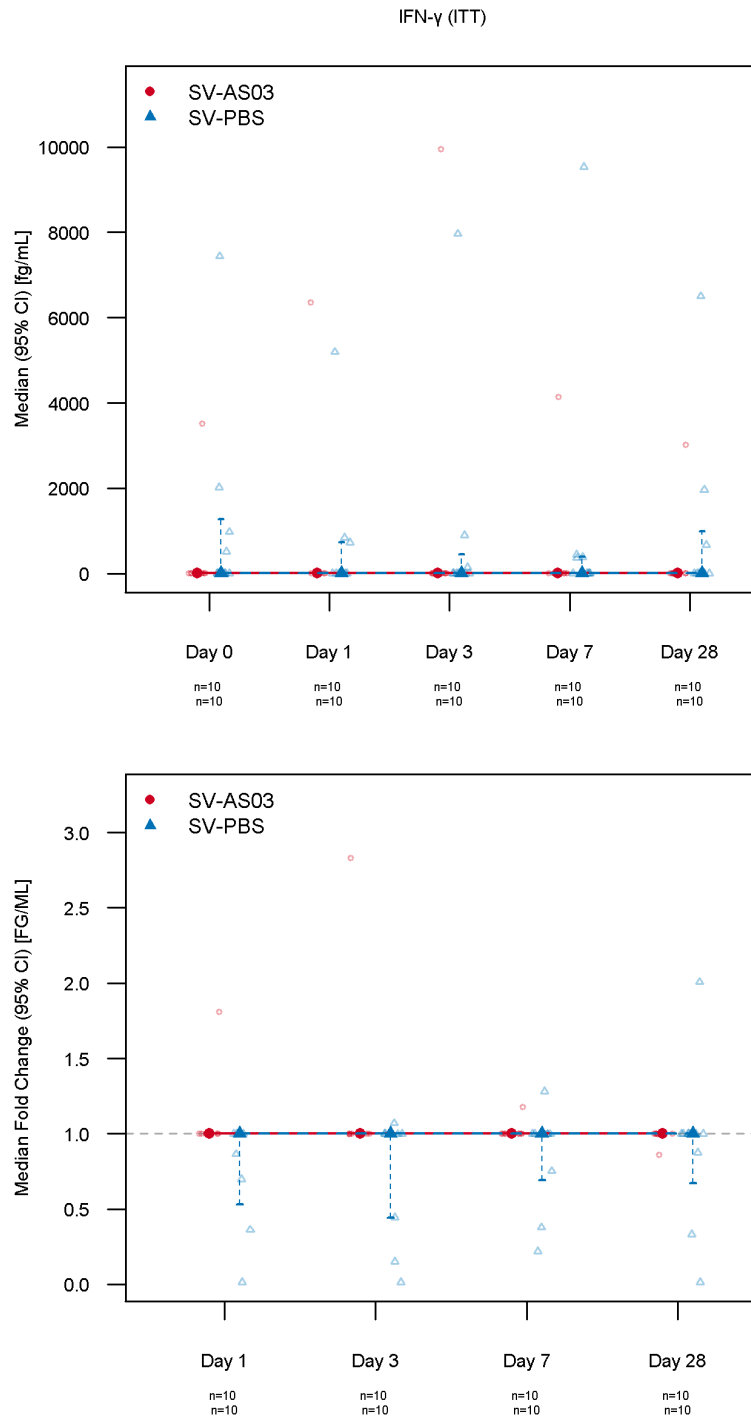

**Figure A4:** Interferon Gamma (IFN- $\gamma$ ) Median Concentration and Baseline Fold Change.

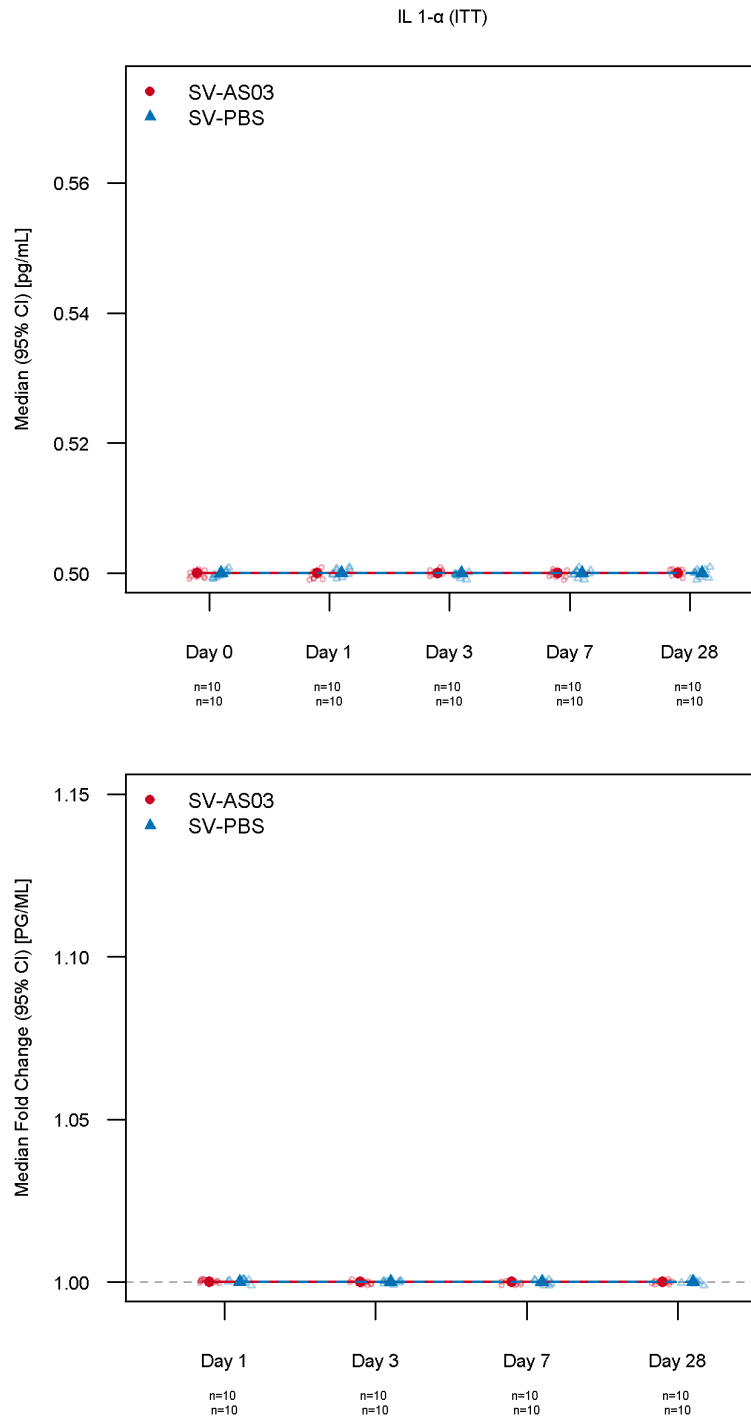

**Figure A5:** Interleukin-1 Alpha (IL-1 $\alpha$ ) Median Concentration and Baseline Fold Change.

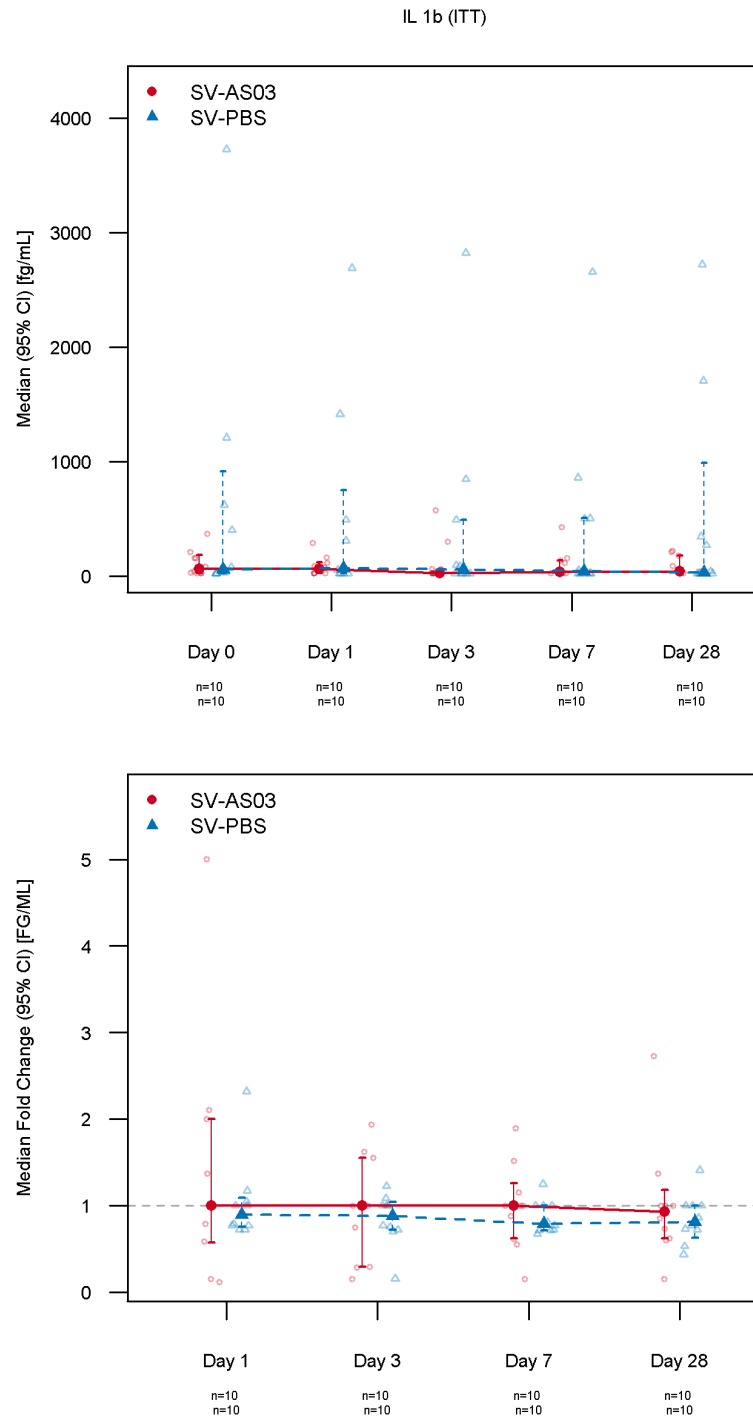

**Figure A6:** Interleukin-1 Beta (IL-1 $\beta$ ) Median Concentration and Baseline Fold Change.



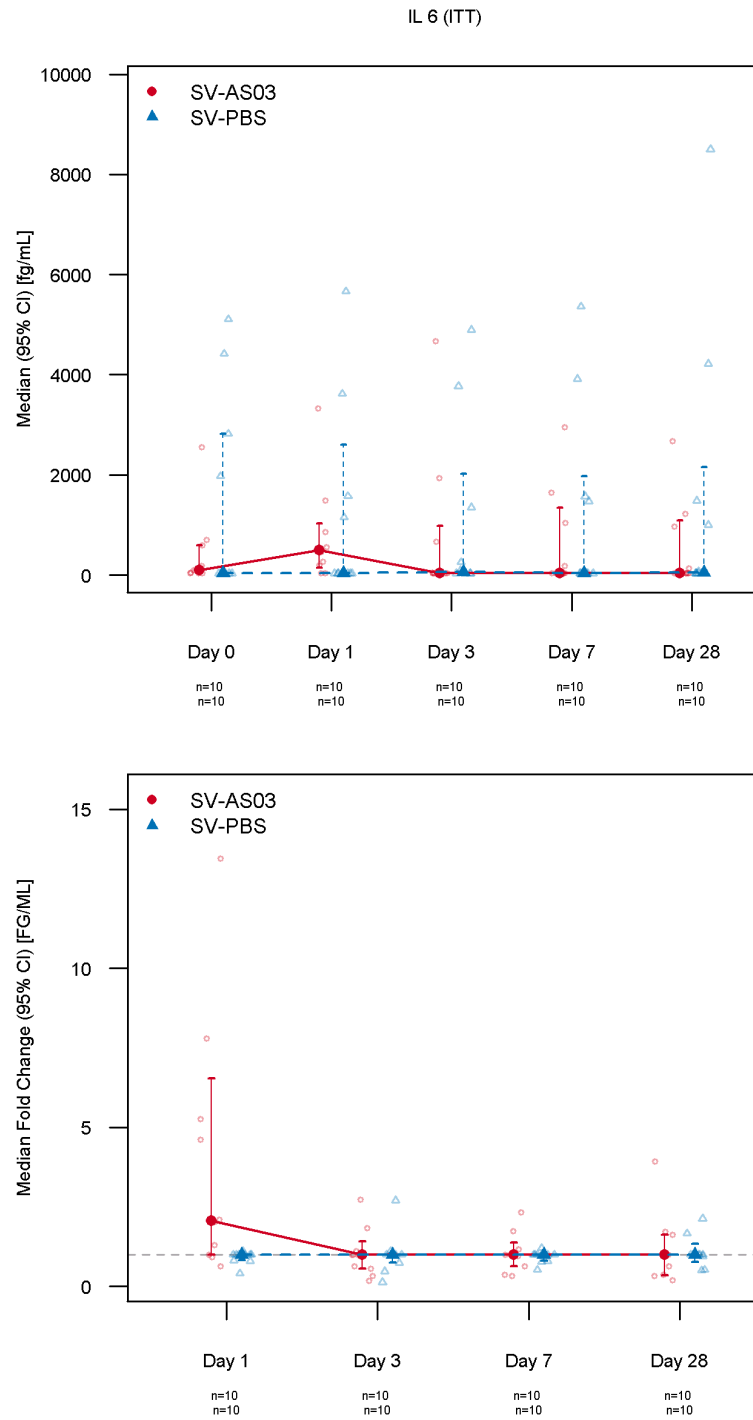

**Figure A7:** Interleukin-6 (IL-6) Median Concentration and Baseline Fold Change.

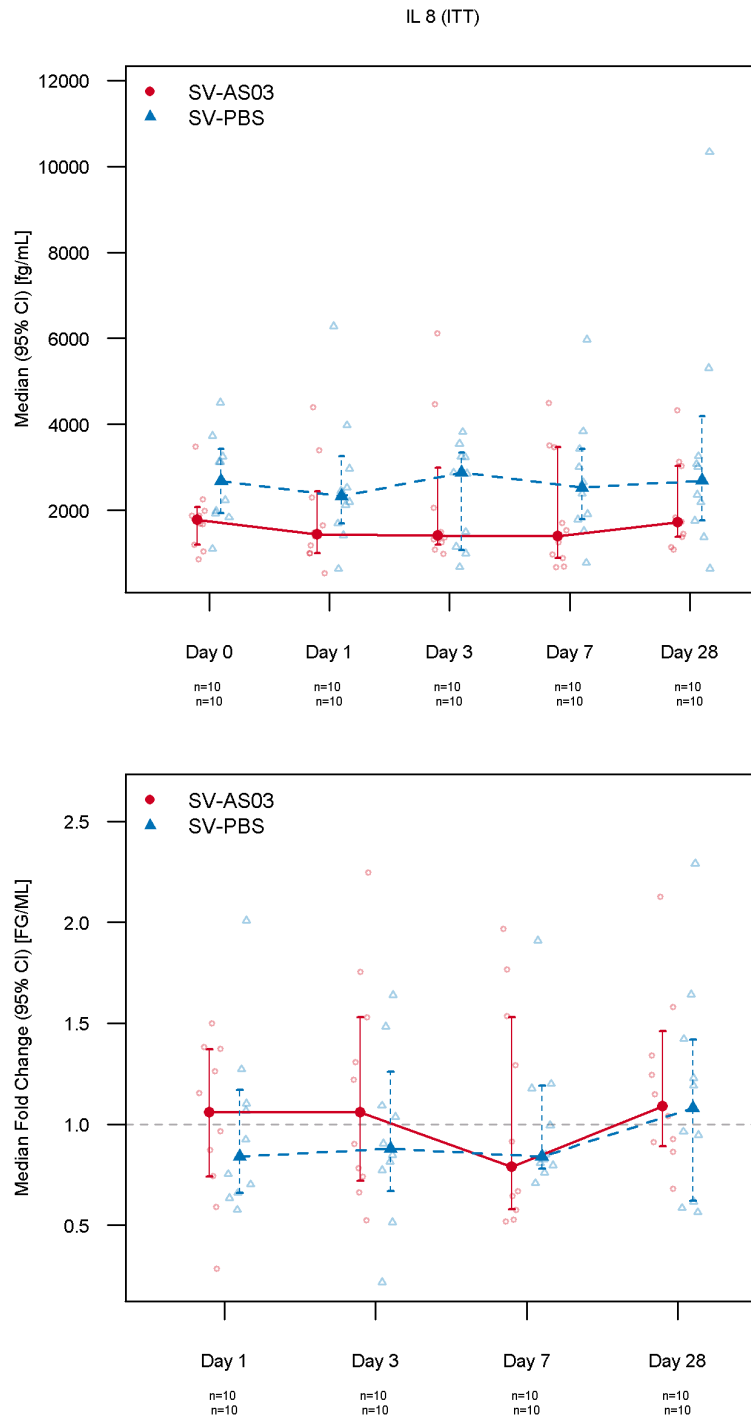

**Figure A8:** Interleukin-8 (IL-8) Median Concentration and Baseline Fold Change.

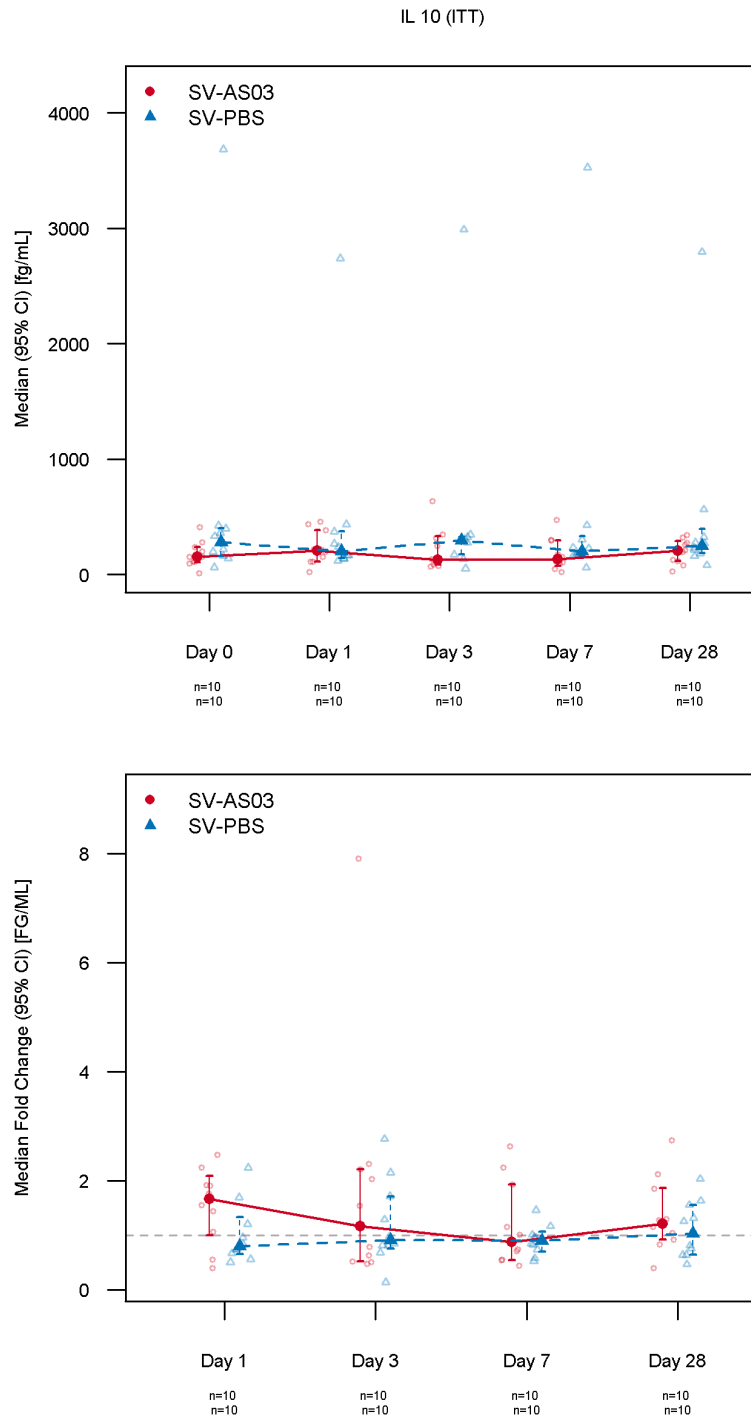

**Figure A9:** Interleukin-10 (IL-10) Median Concentration and Baseline Fold Change.

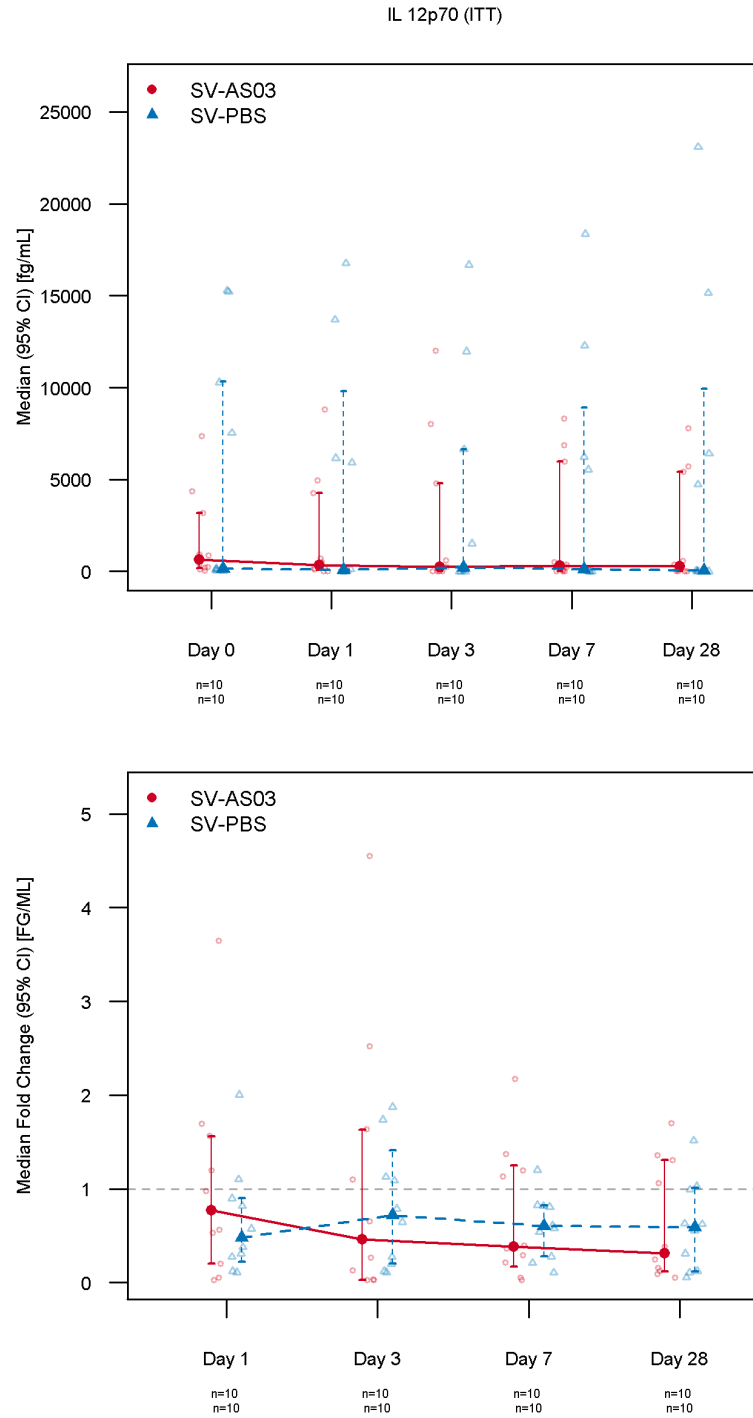

**Figure A10:** Interleukin-12 p70 (IL-12p70) Median Concentration and Baseline Fold Change.

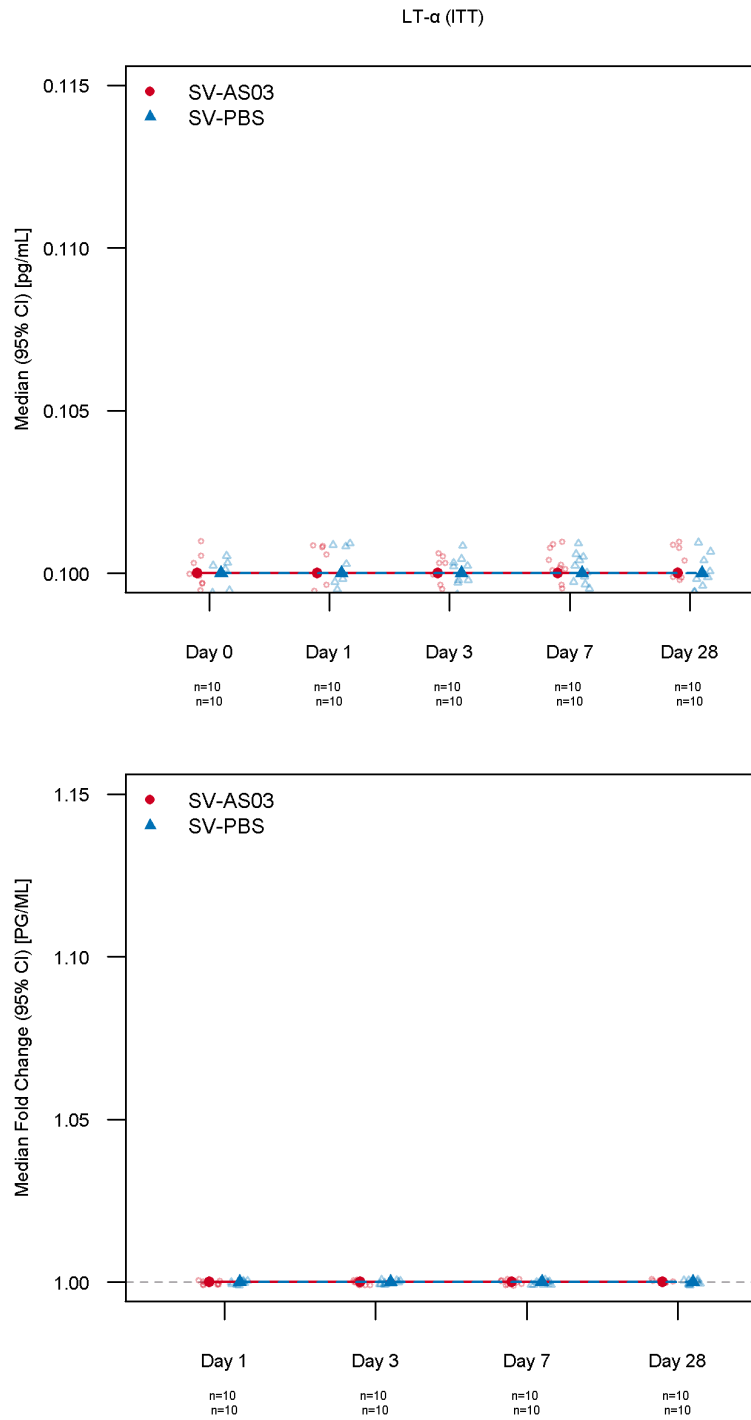

**Figure A11:** Lymphotoxin-alpha (LT- $\alpha$ ) Median Concentration and Baseline Fold Change.

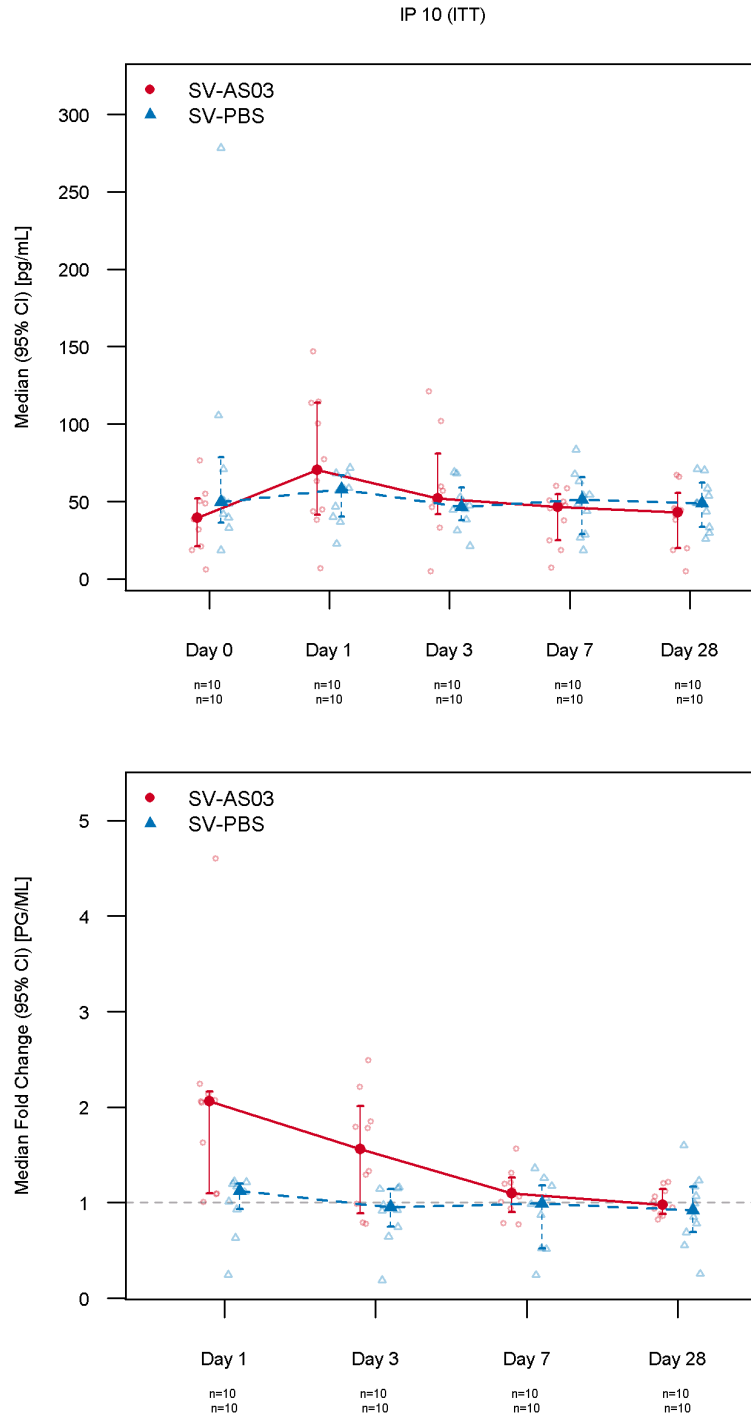

**Figure A12:** Interferon Gamma-Induced Protein 10 (IP-10) Median Concentration and Baseline Fold Change.

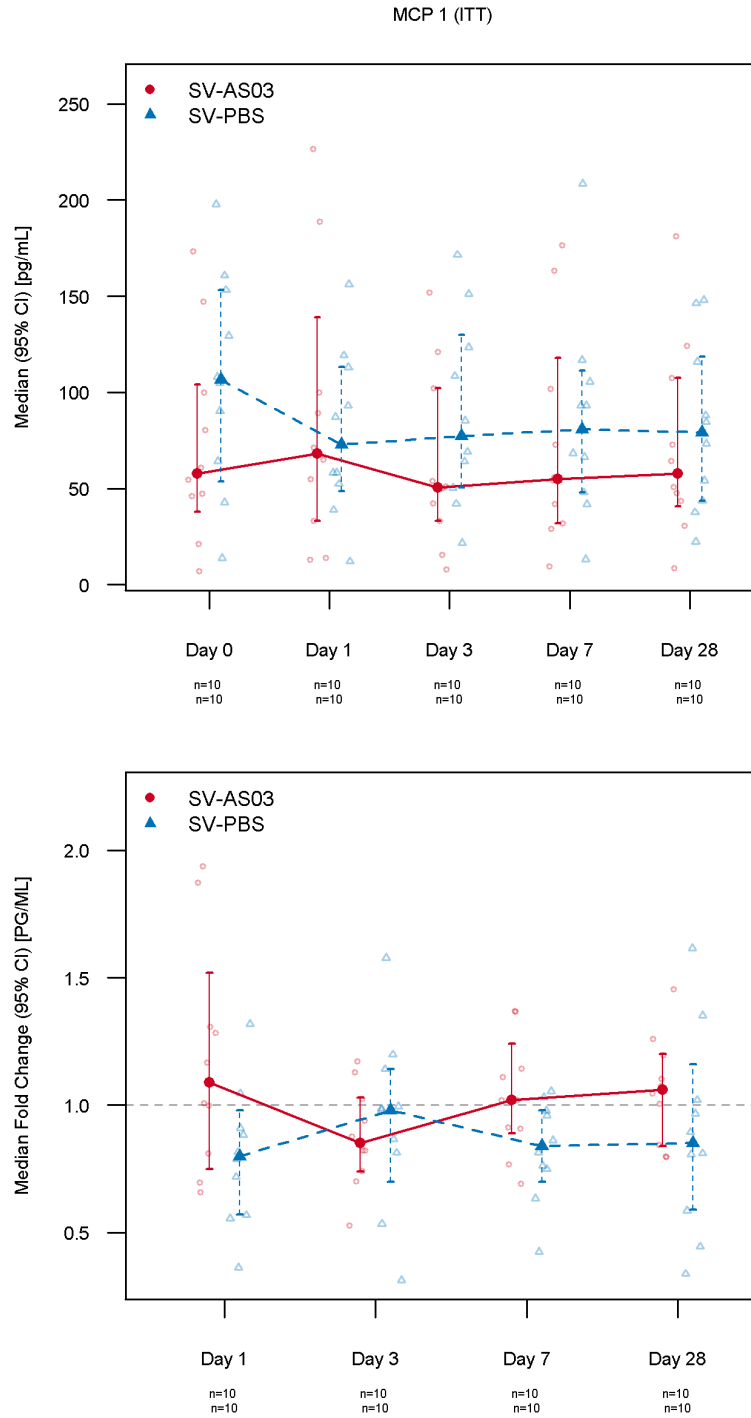

**Figure A13:** Monocyte Chemoattractant Protein-1 (MCP-1) Median Concentration and Baseline Fold Change.

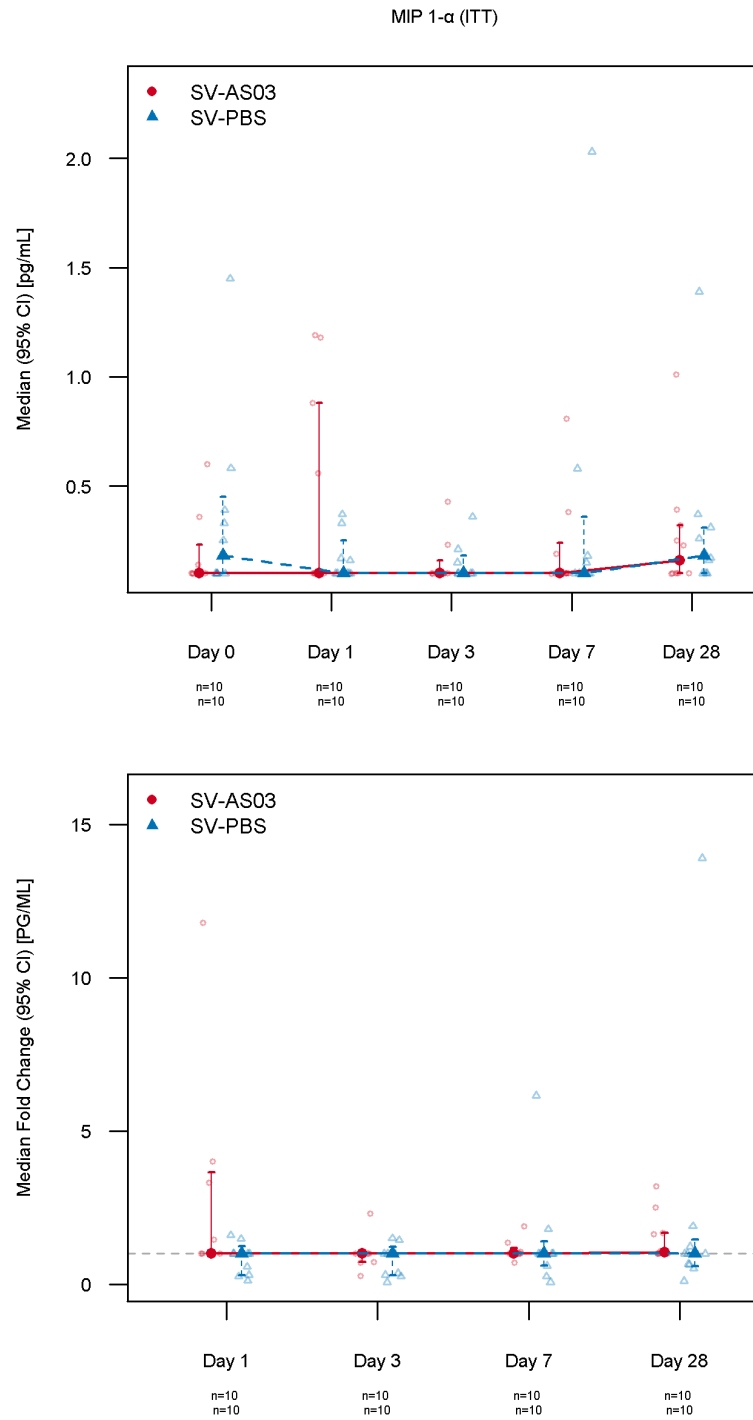

**Figure A14:** Macrophage Inflammatory Protein (MIP-1 $\alpha$ ) Median Concentration and Baseline Fold Change.



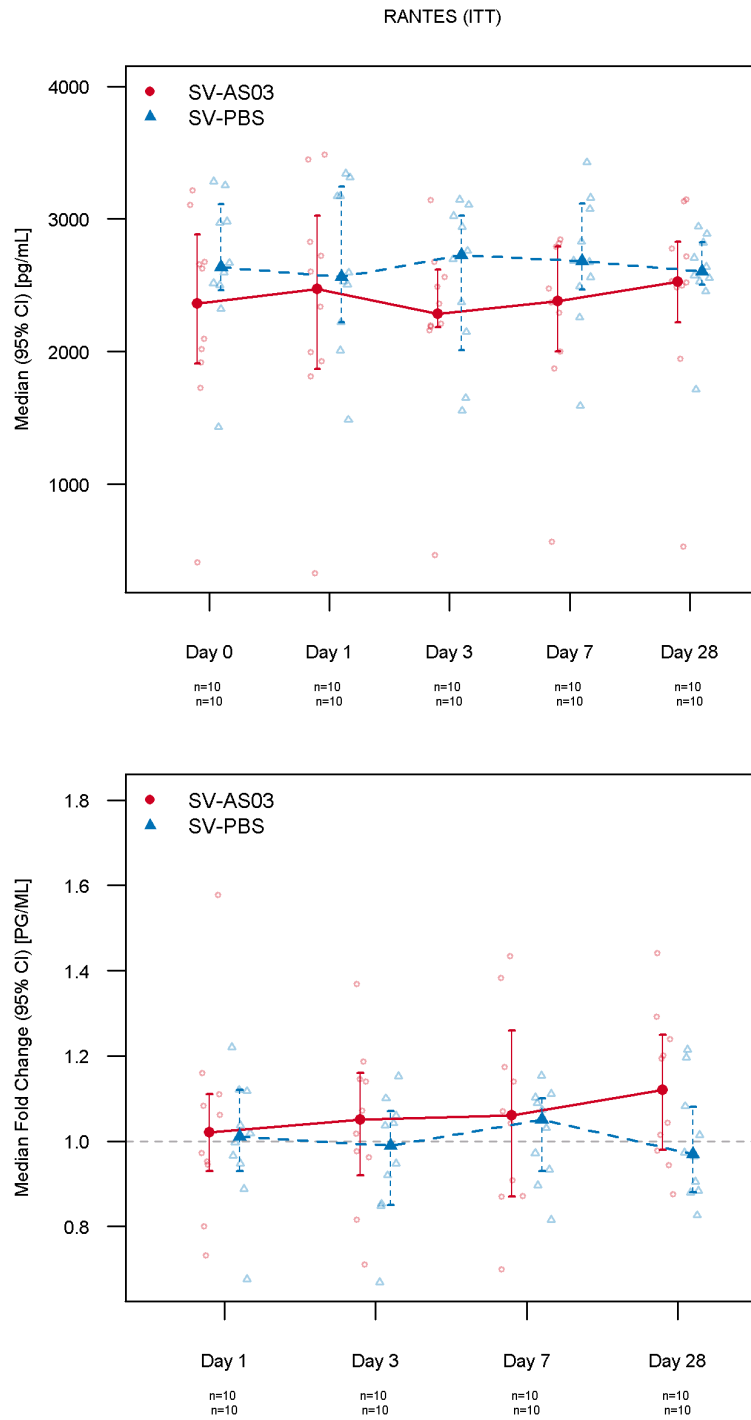

**Figure A15:** Chemokine (C-C motif) Ligand 5 (RANTES) Median Concentration and Baseline Fold Change.

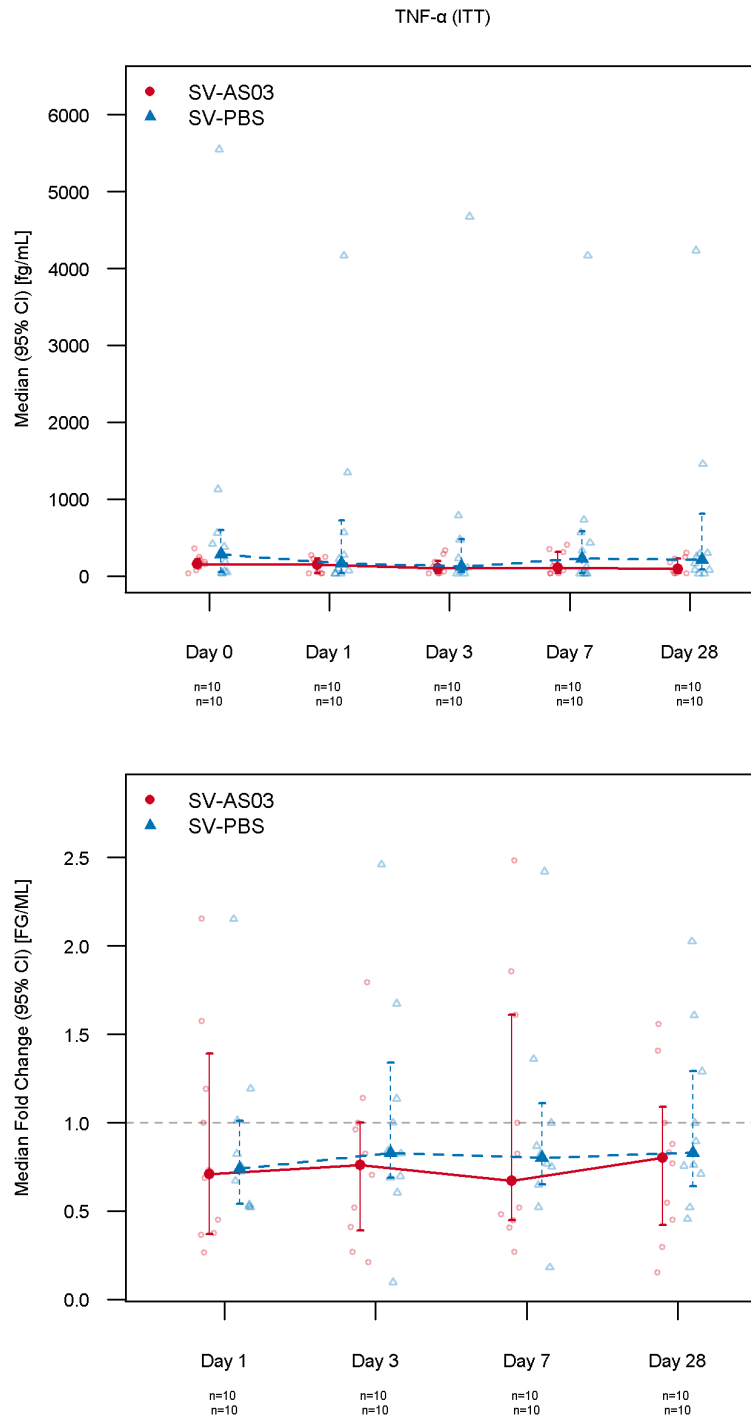

**Figure A16:** Tumor Necrosis Factors (TNF) Median Concentration and Baseline Fold Change.

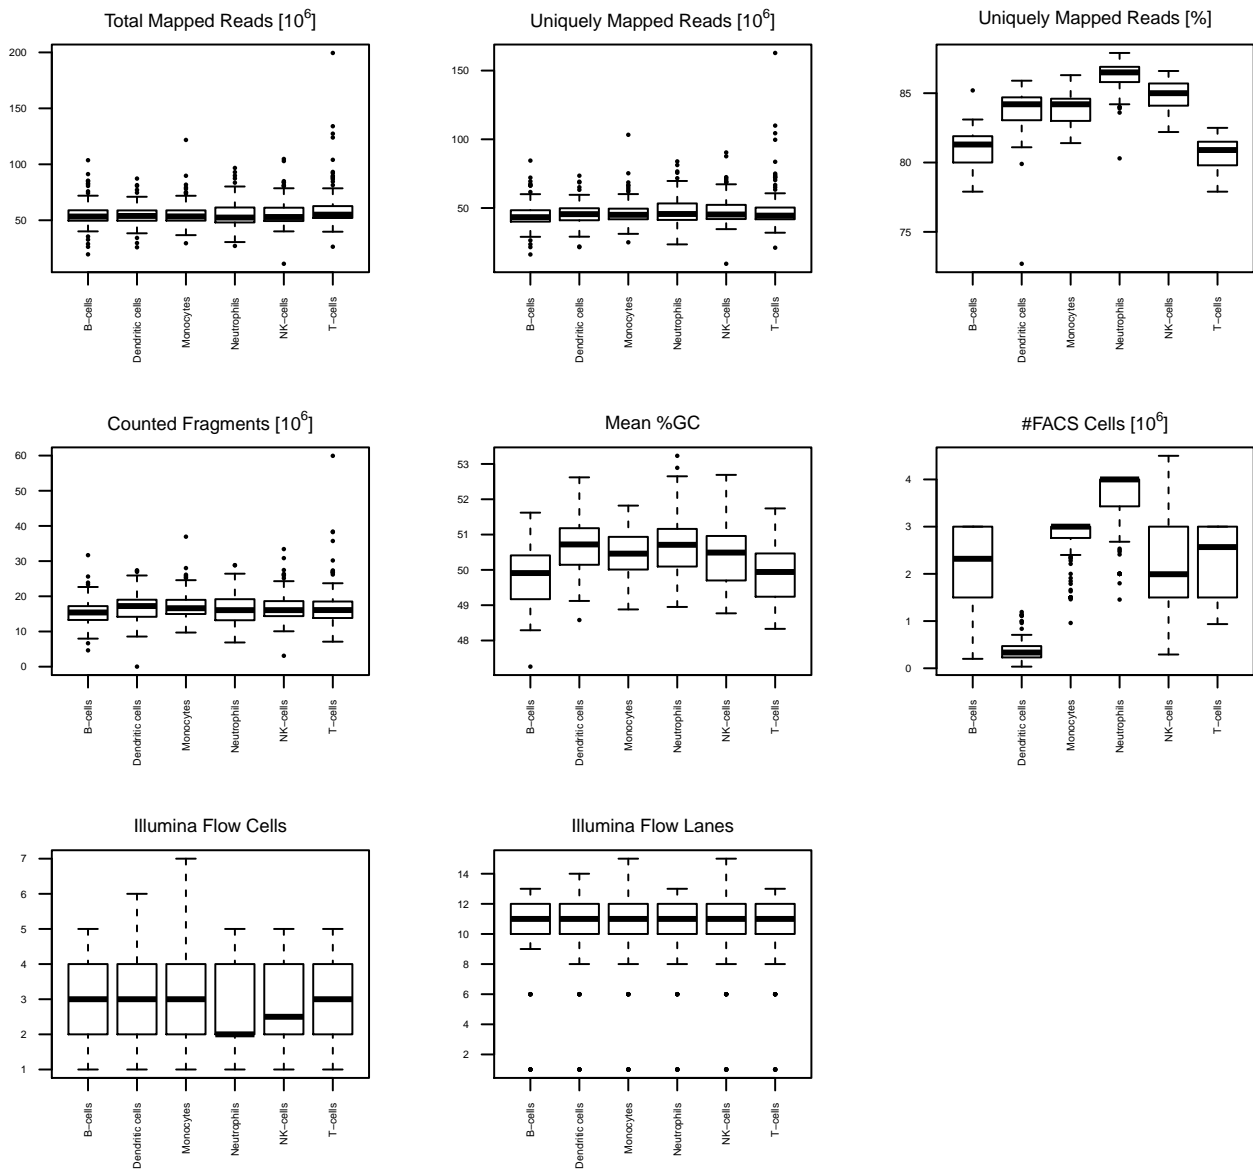

Figure A17: Boxplots of technical variables by cell type (RNA-Seq).

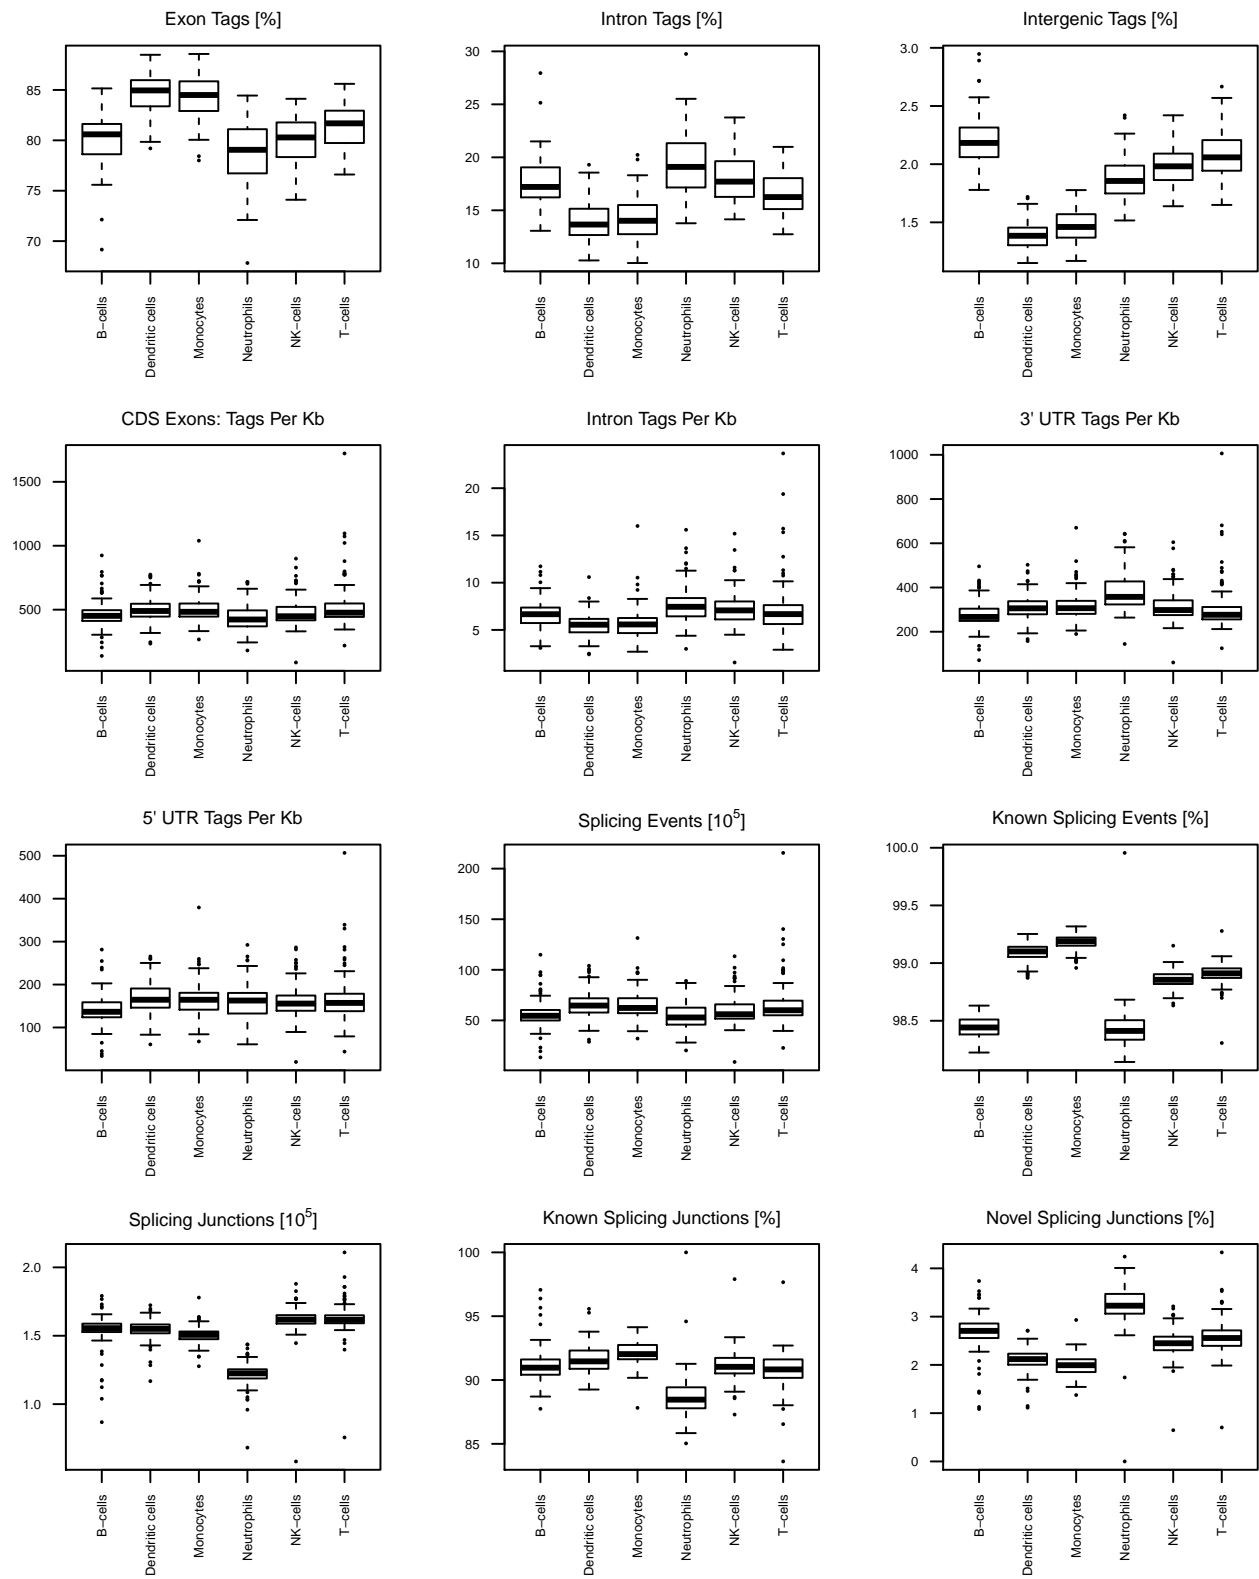

Figure A18: Boxplots of gene model variables by cell type (RNA-Seq).

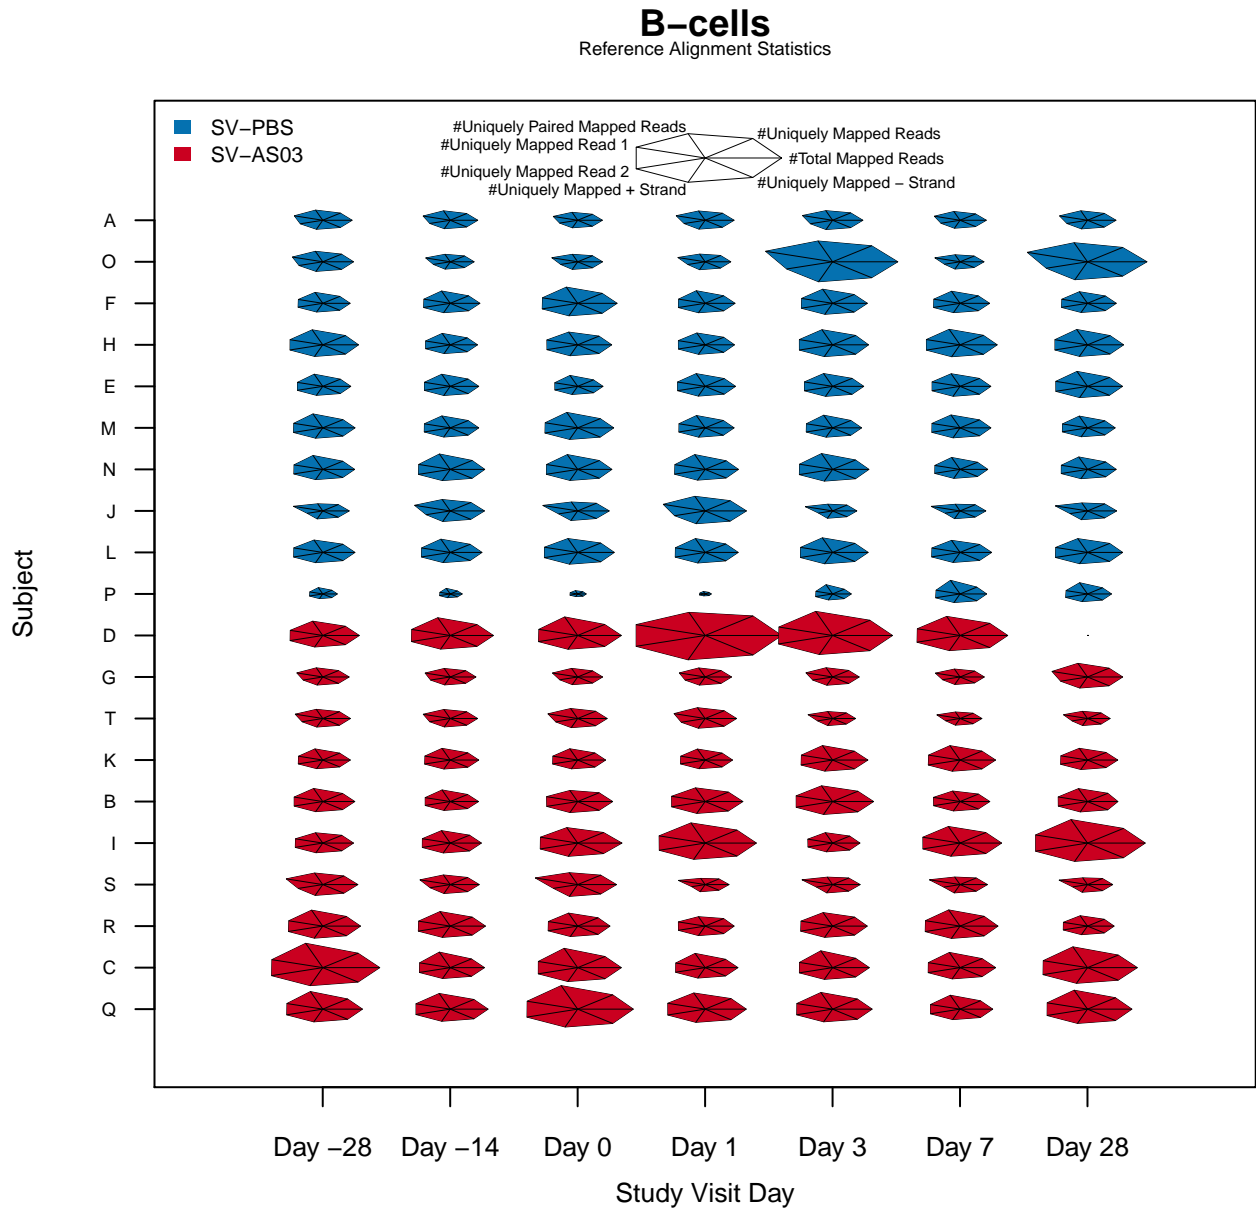

**Figure A19:** Starplots of human genome reference alignment statistics (RNA-Seq, B-cells).

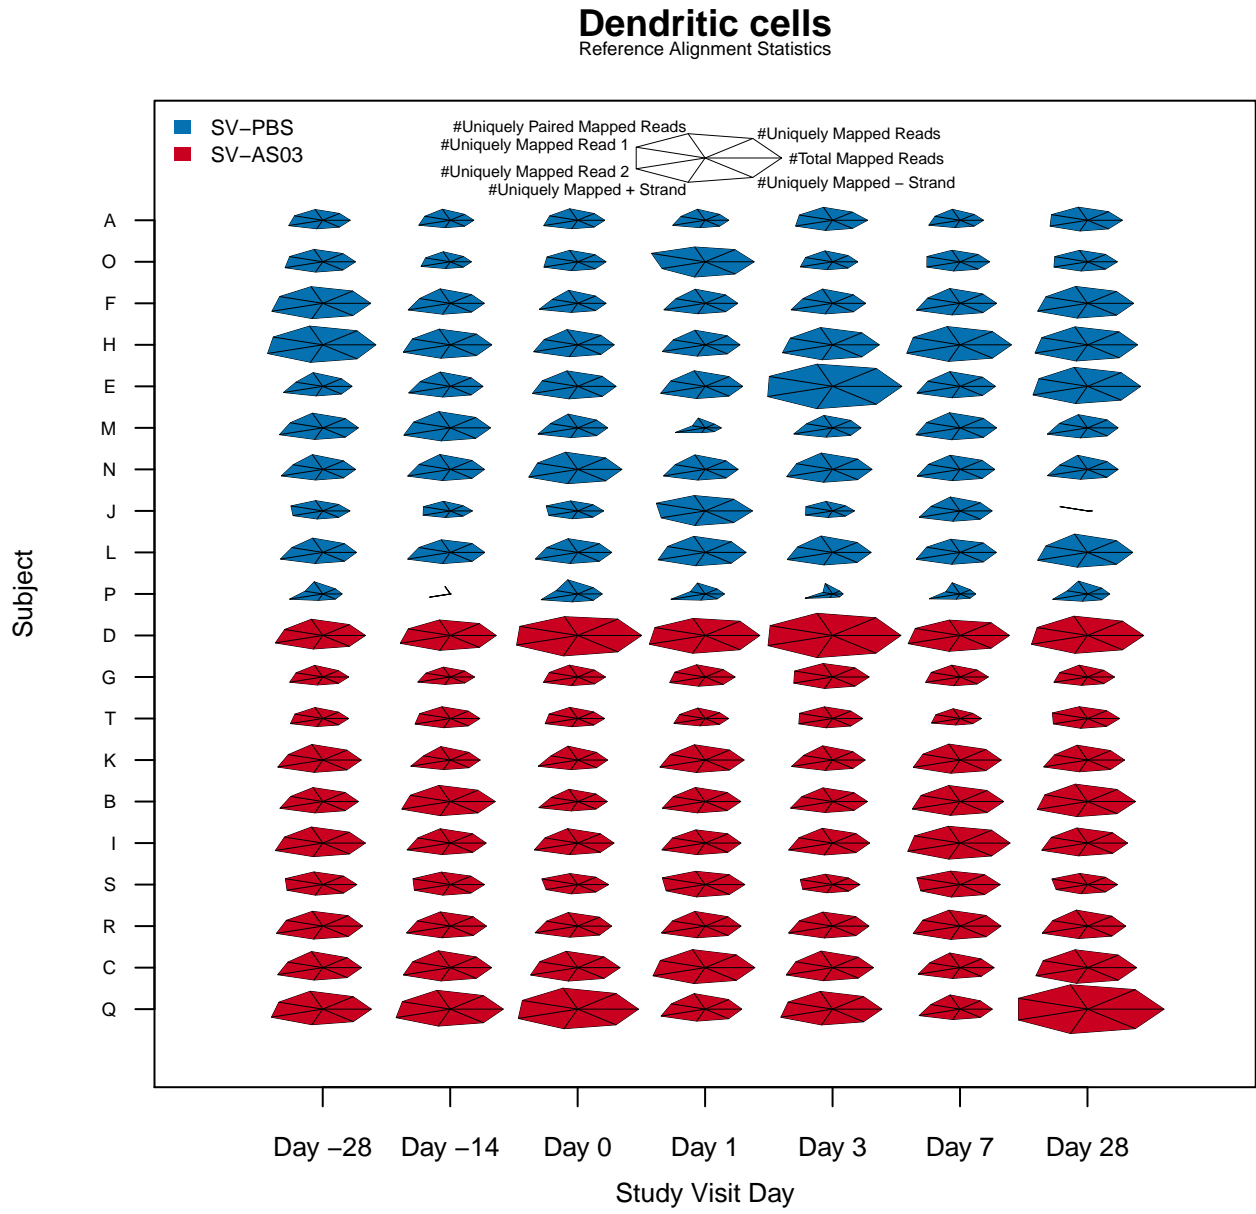

**Figure A20:** Starplots of human genome reference alignment statistics (RNA-Seq, Dendritic cells).

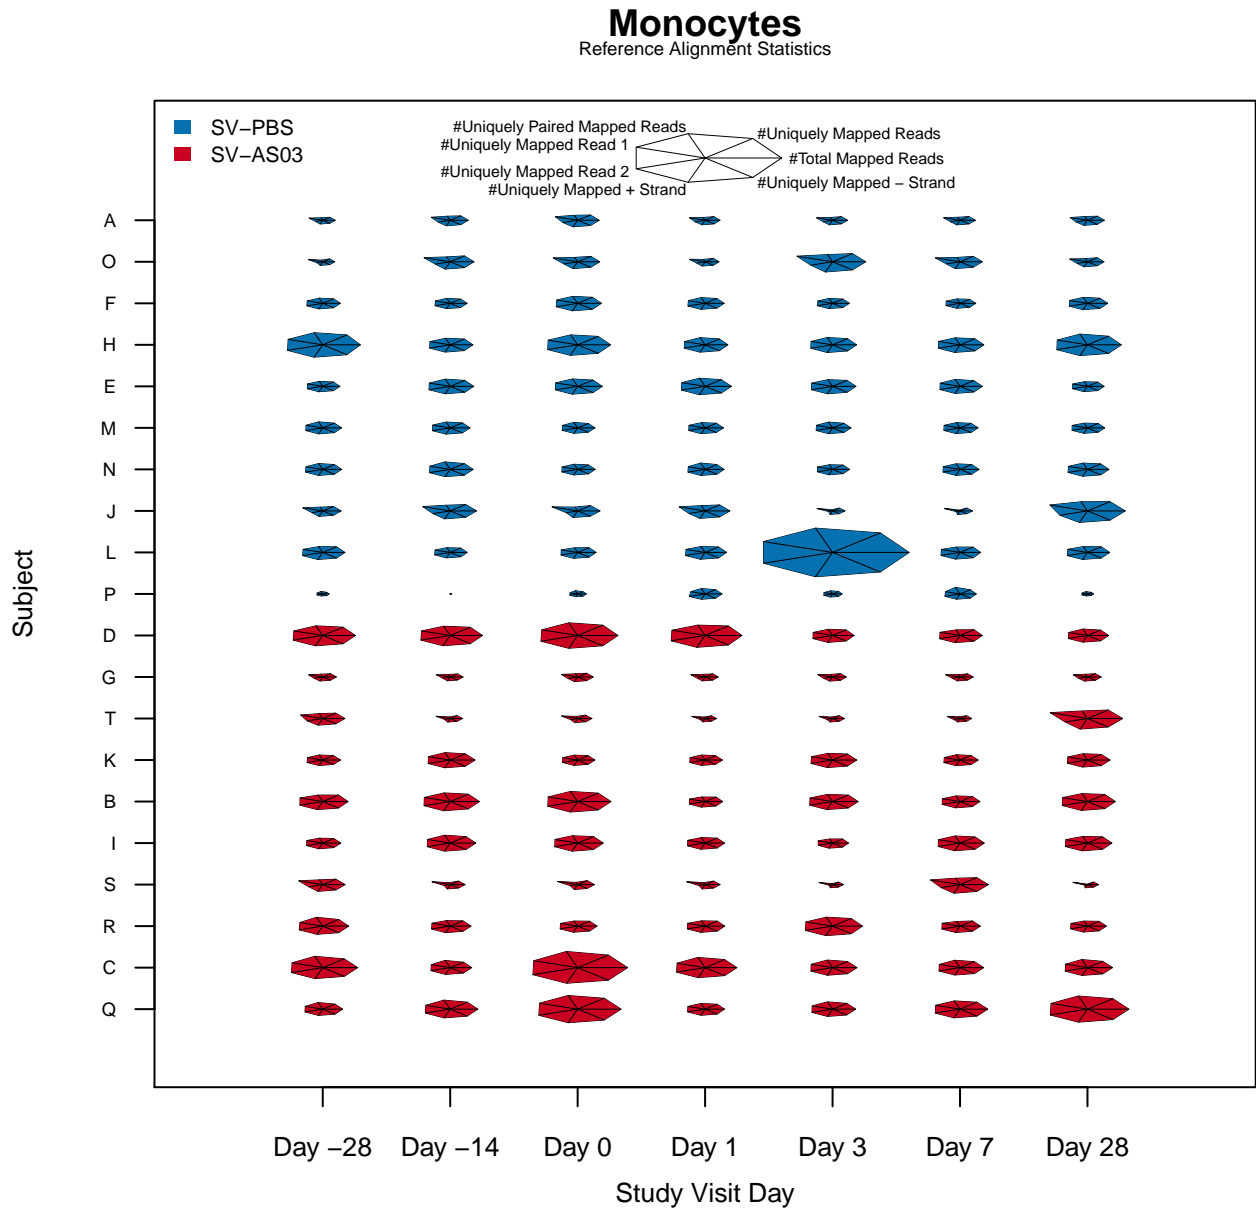

**Figure A21:** Starplots of human genome reference alignment statistics (RNA-Seq, Monocytes).

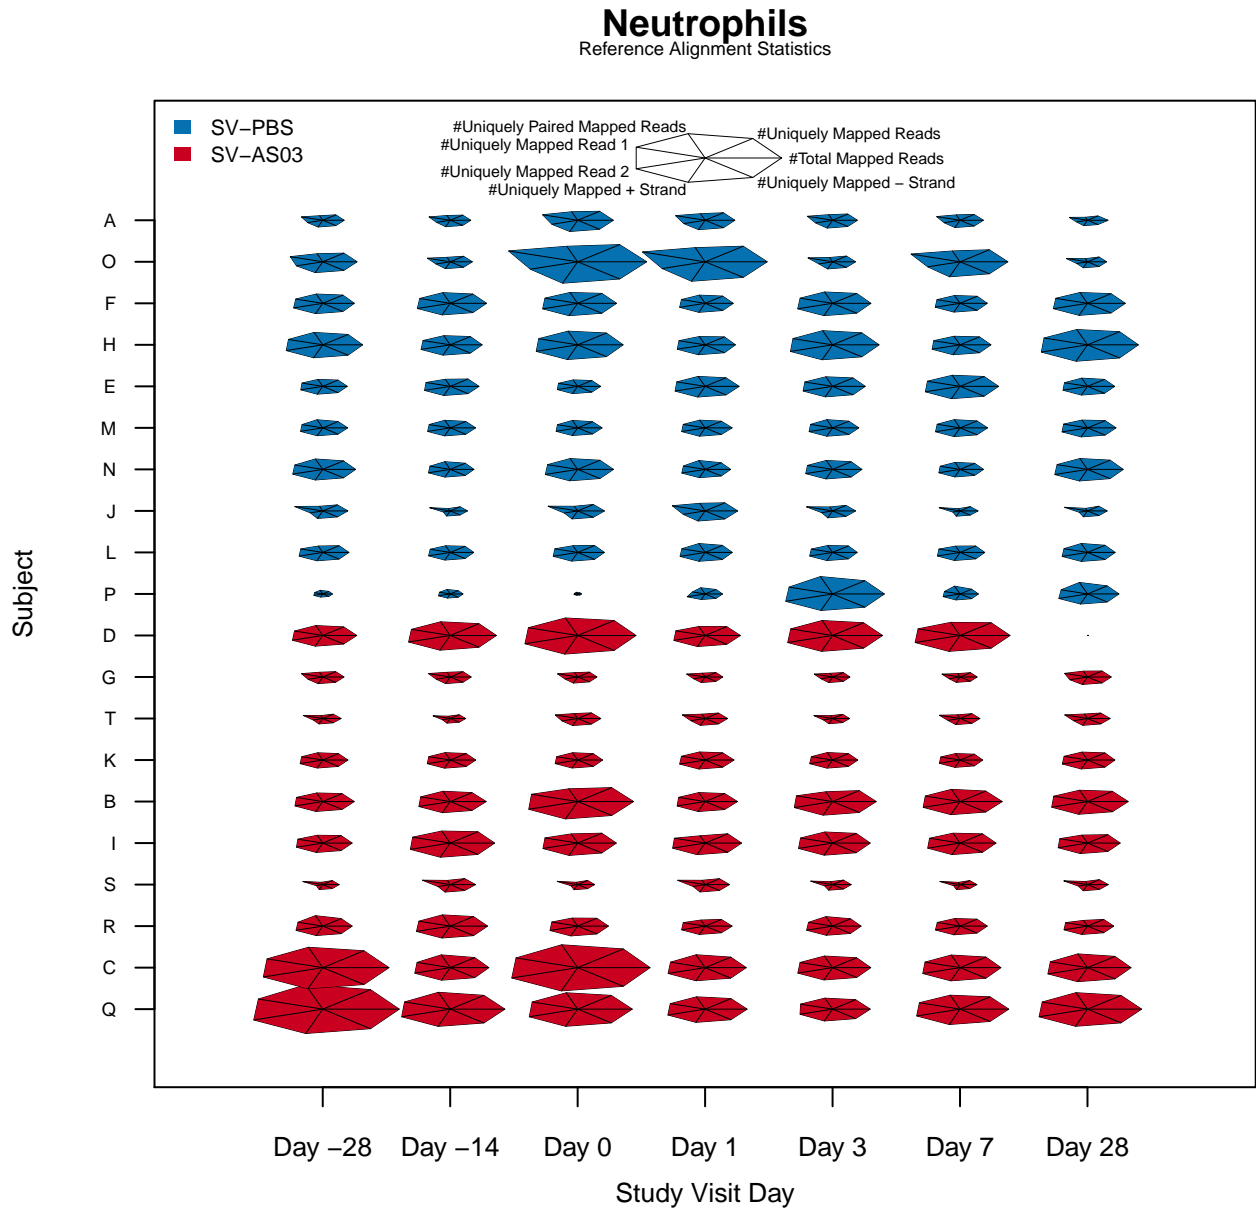

**Figure A22:** Starplots of human genome reference alignment statistics (RNA-Seq, Neutrophils).



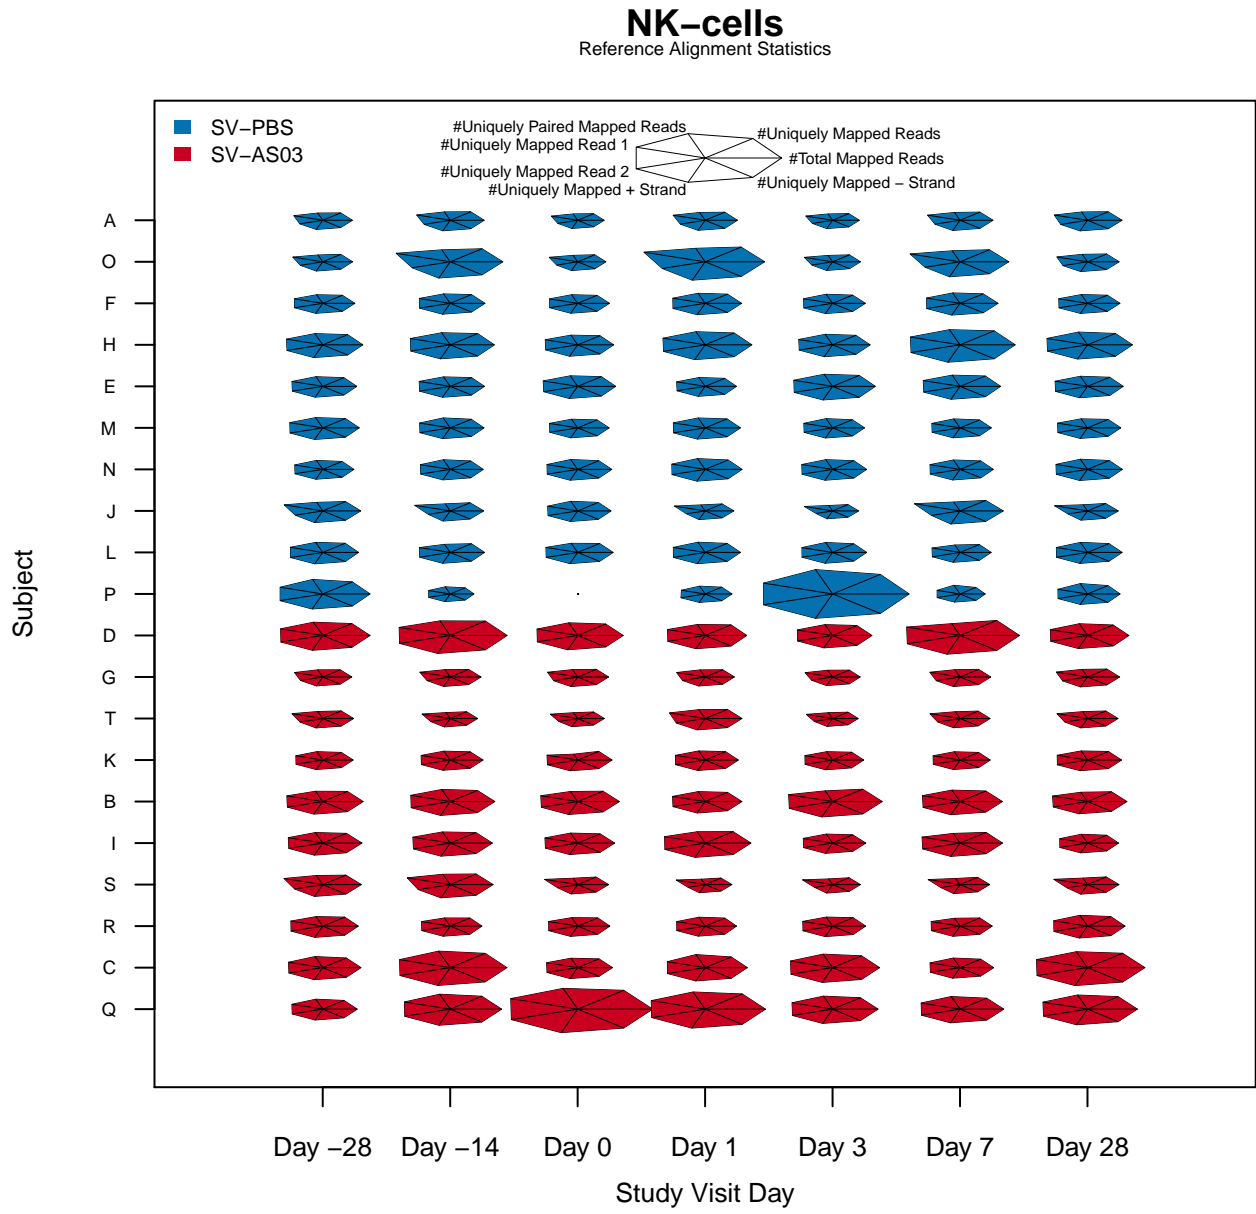

**Figure A23:** Starplots of human genome reference alignment statistics (RNA-Seq, NK-cells).

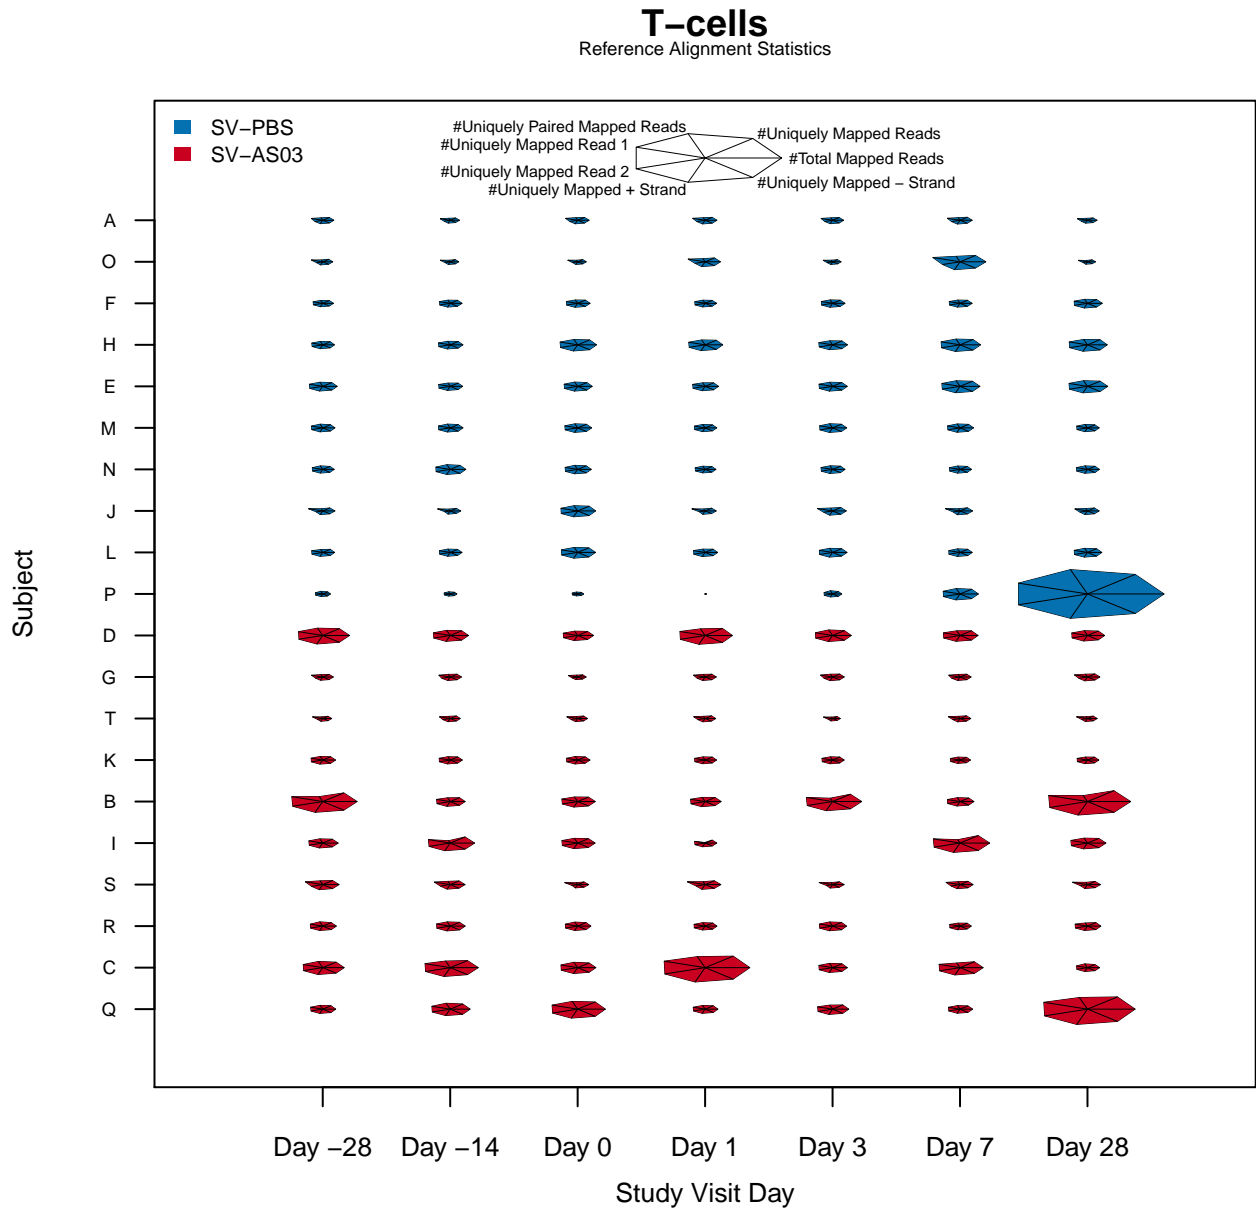

**Figure A24:** Starplots of human genome reference alignment statistics (RNA-Seq, T-cells).

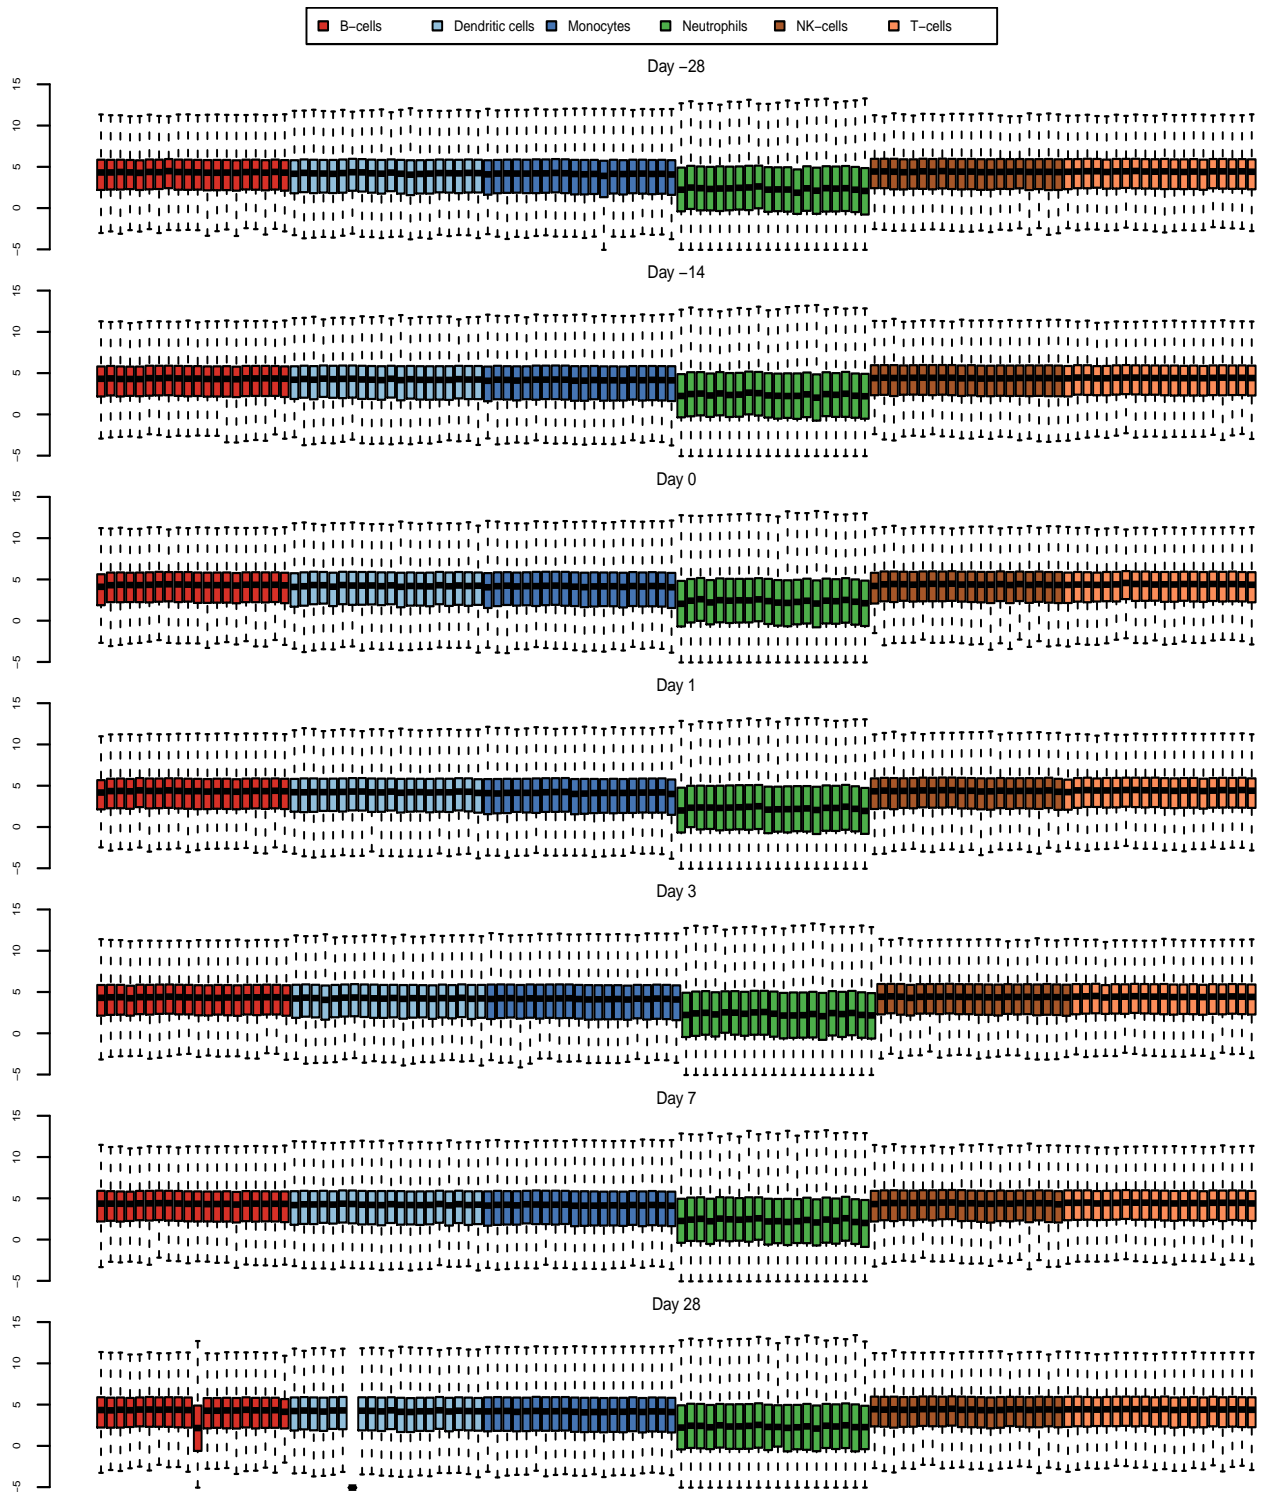

**Figure A25:** Boxplots of  $\log_2$  counts per million before TMM normalization. Boxplot outliers are omitted for clarity. Ordering by day was chosen to optimize visual representation.

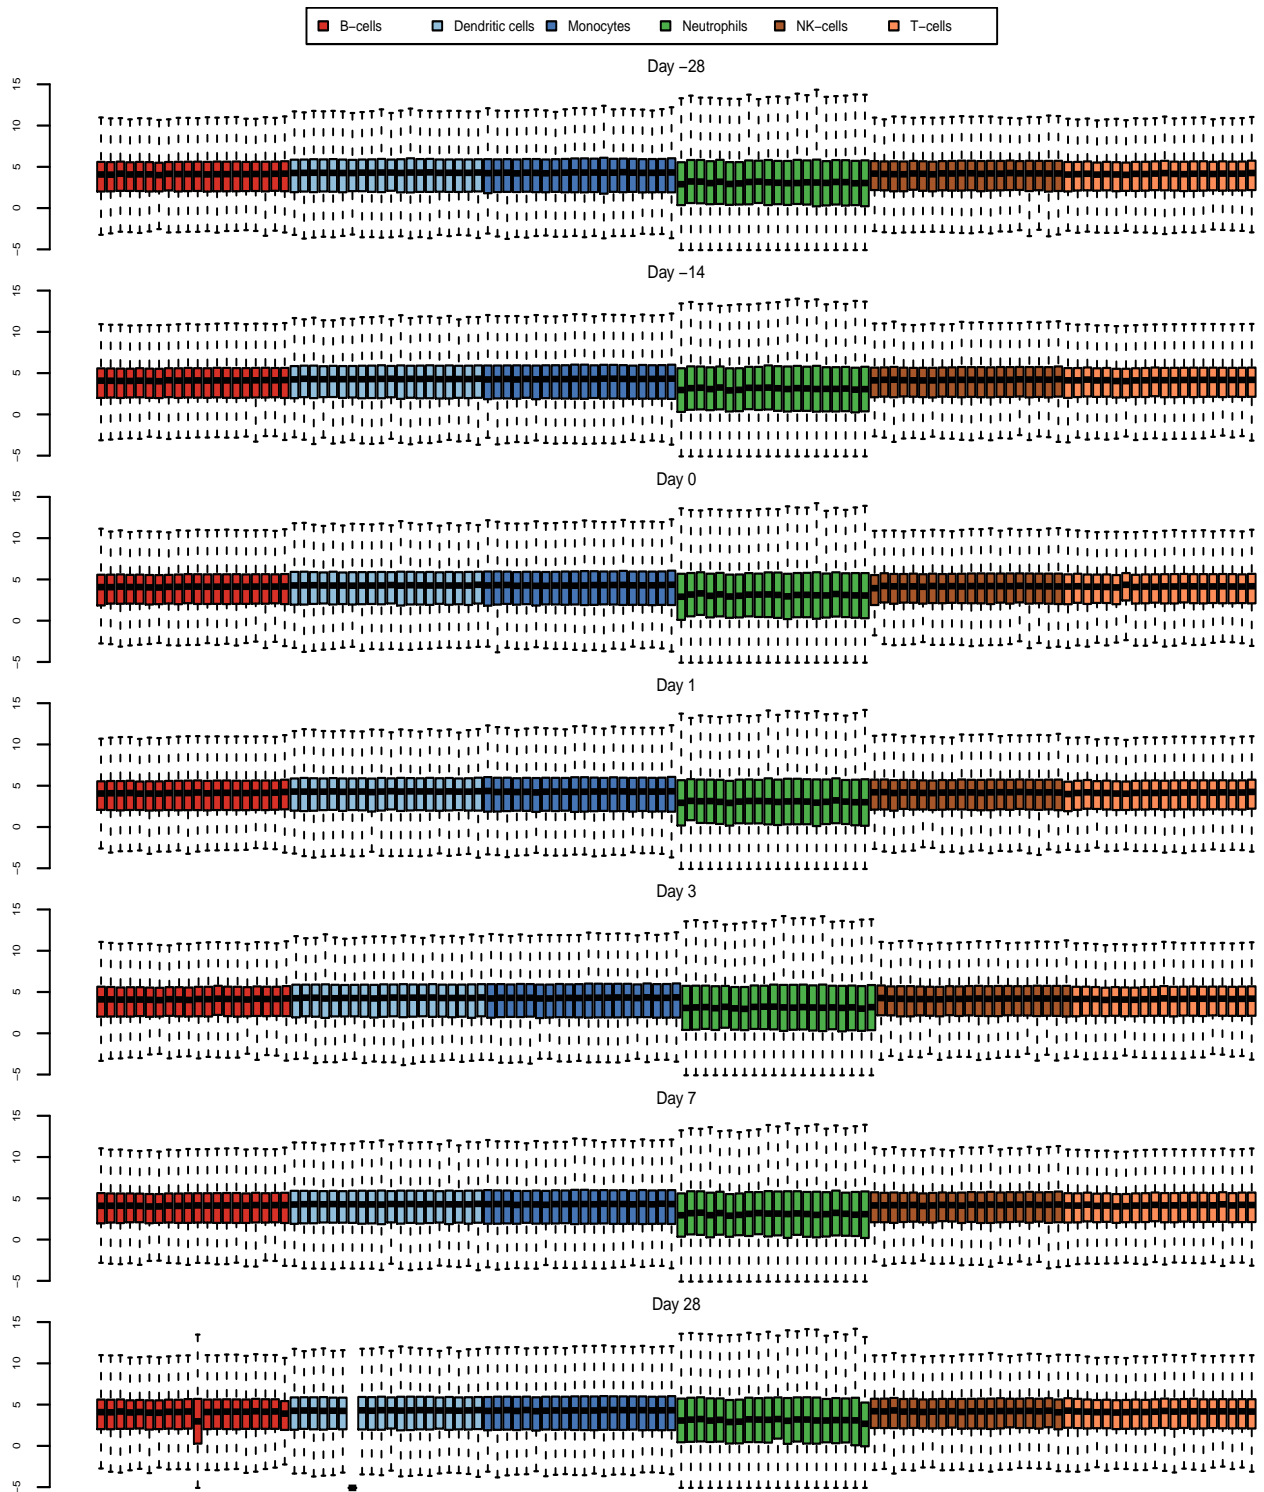

**Figure A26:** Boxplots of  $\log_2$  counts per million after TMM normalization. Boxplo outliers are omitted for clarity. Ordering by day was chosen to optimize visual representation (RNA-Seq).

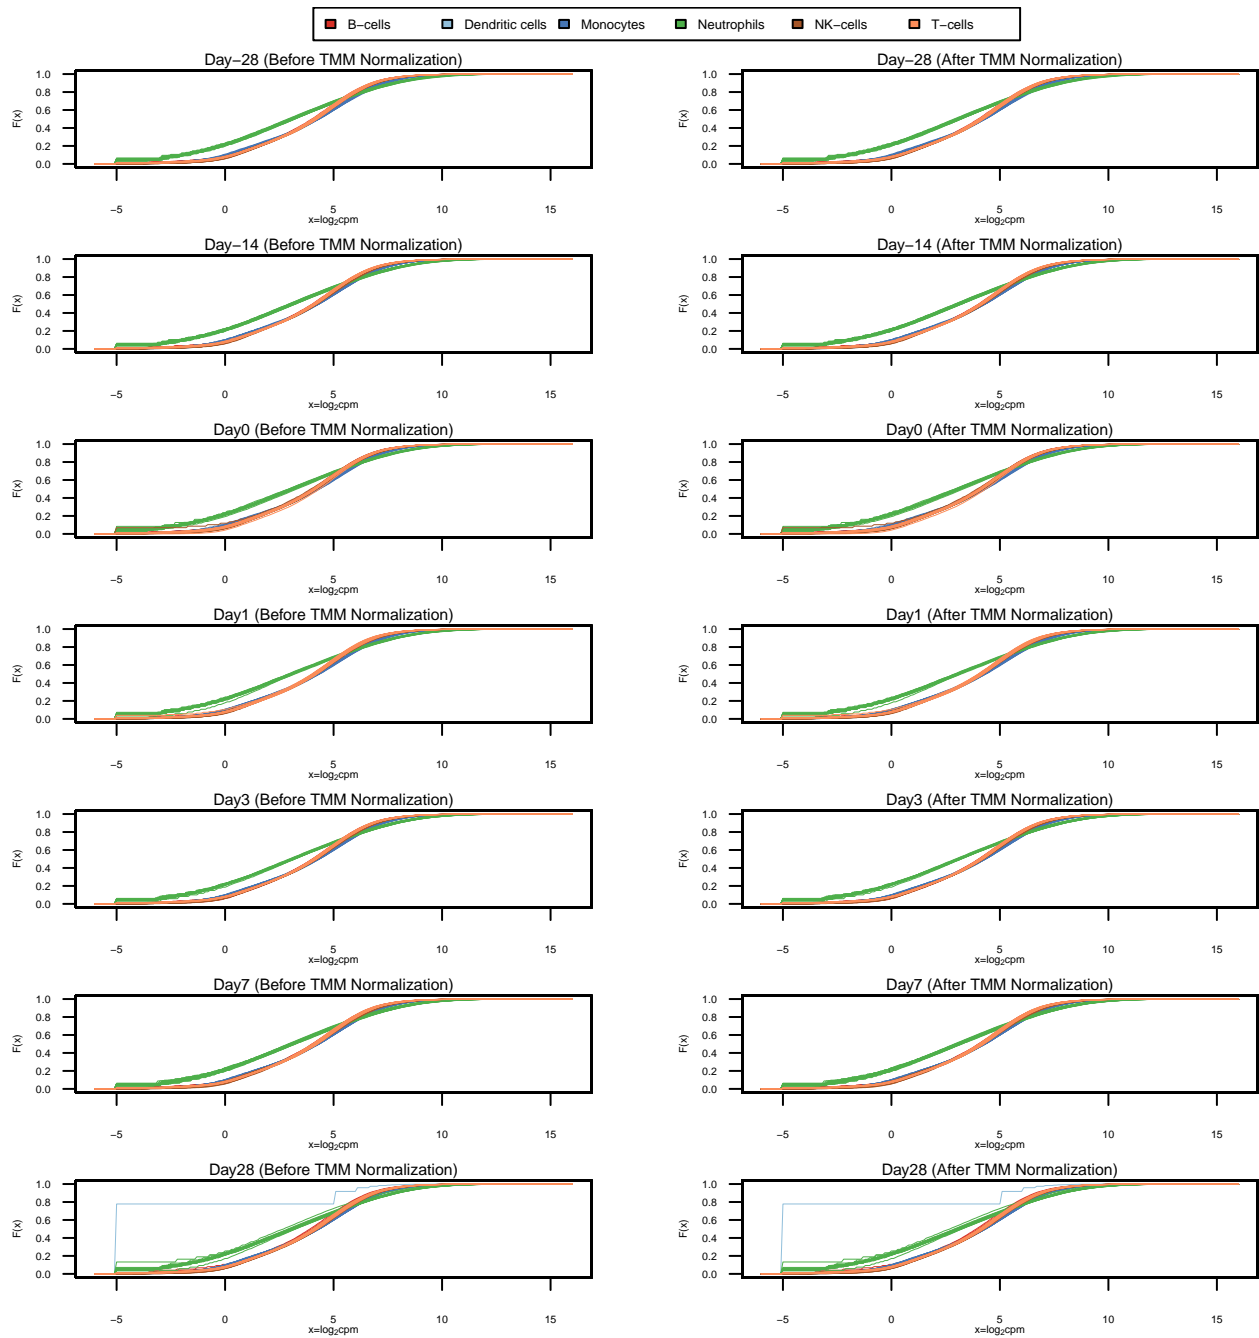

**Figure A27:** Empirical cumulative distribution function plots of  $\log_2$  counts per million before and after TMM normalization (RNA-Seq).

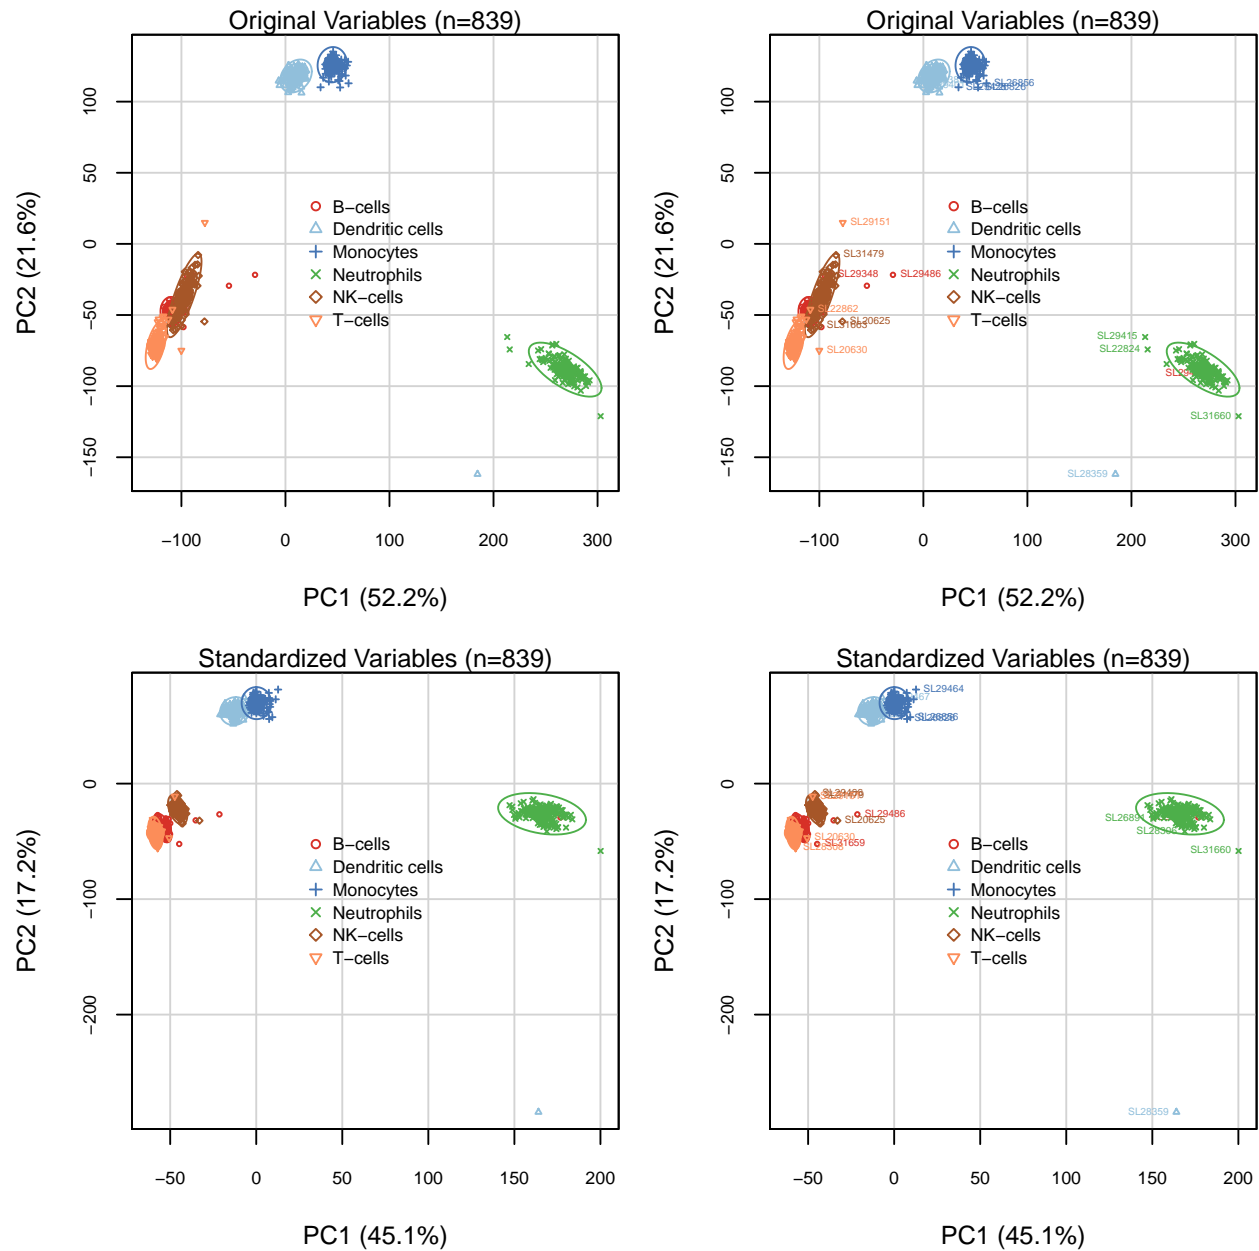

**Figure A28:** PCA biplots (RNA-Seq, n=839). 99.6% confidence ellipses are drawn for each cell type. The right panels are identical to the left panels except that they show dataset labels for the three most outlying samples per cell type based on maximum Mahalanobis distance.

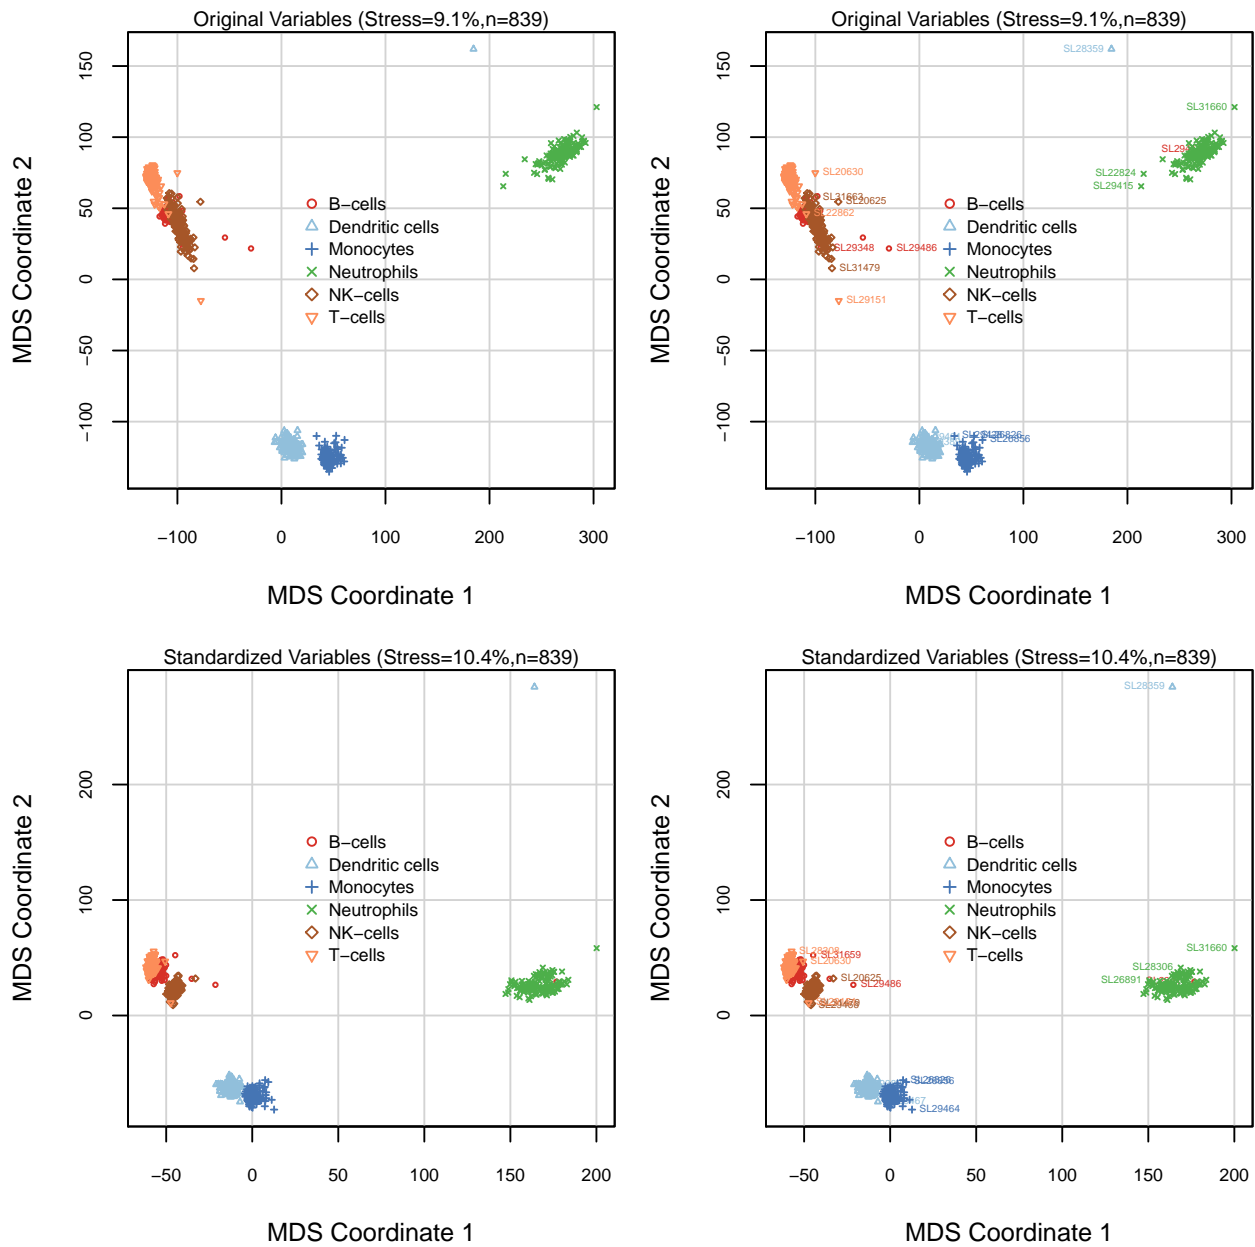

**Figure A29:** Non-metric multidimensional scaling biplots (RNA-Seq, n=839). Euclidean distance was used to determine pairwise differences. The right panels are identical to the left panels except that they show dataset labels for the three most outlying samples per cell type based on maximum Mahalanobis distance.

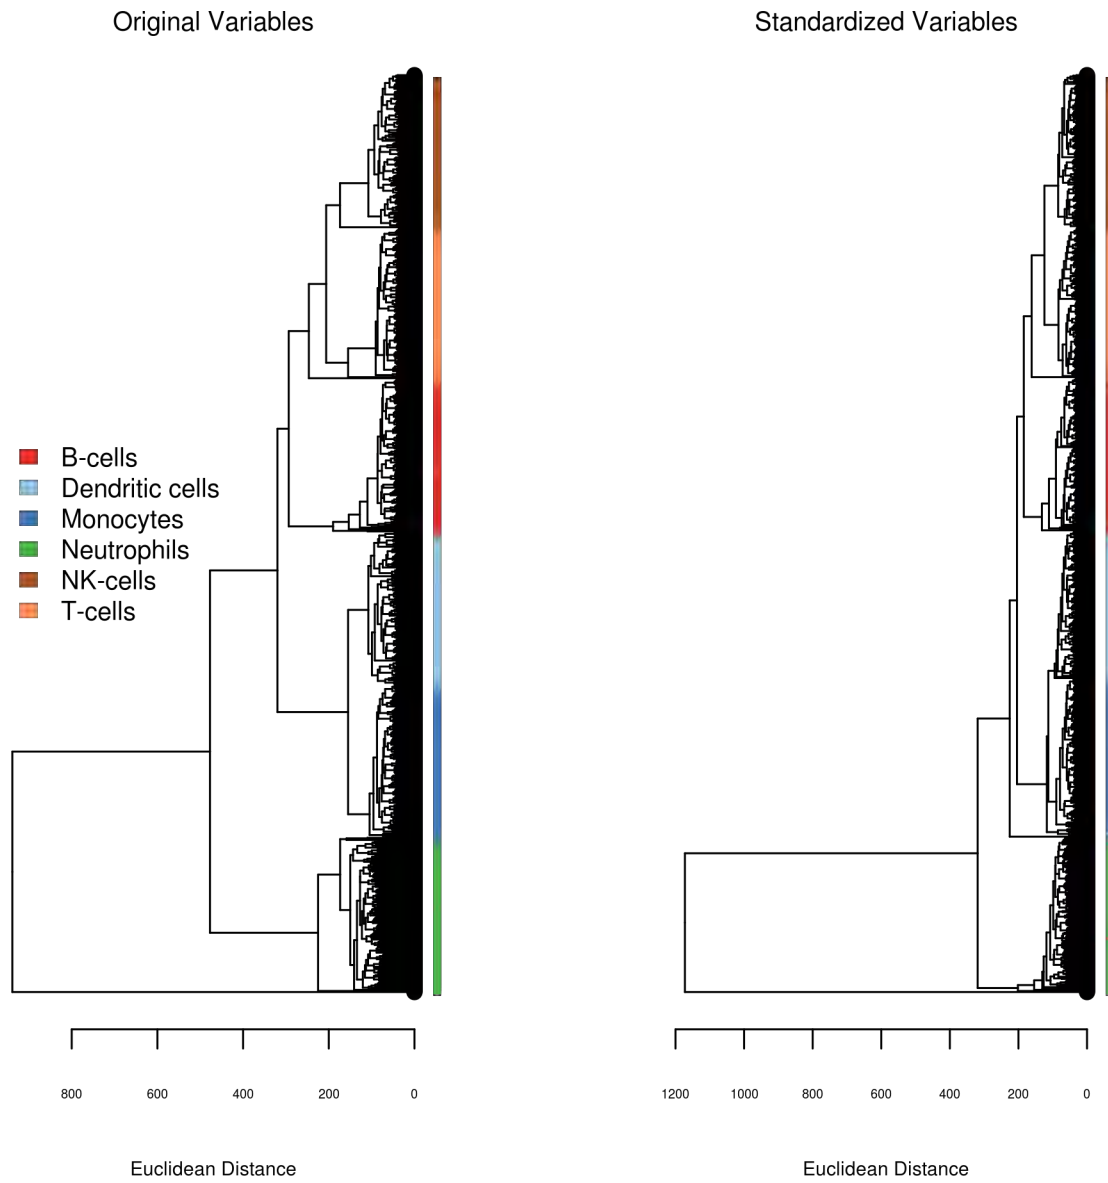

**Figure A30:** Hierarchical Clustering Plots (RNA-Seq, n=839). Euclidean distances hierarchically clustered using the complete linkage clustering algorithm. Samples are color coded by cell type.



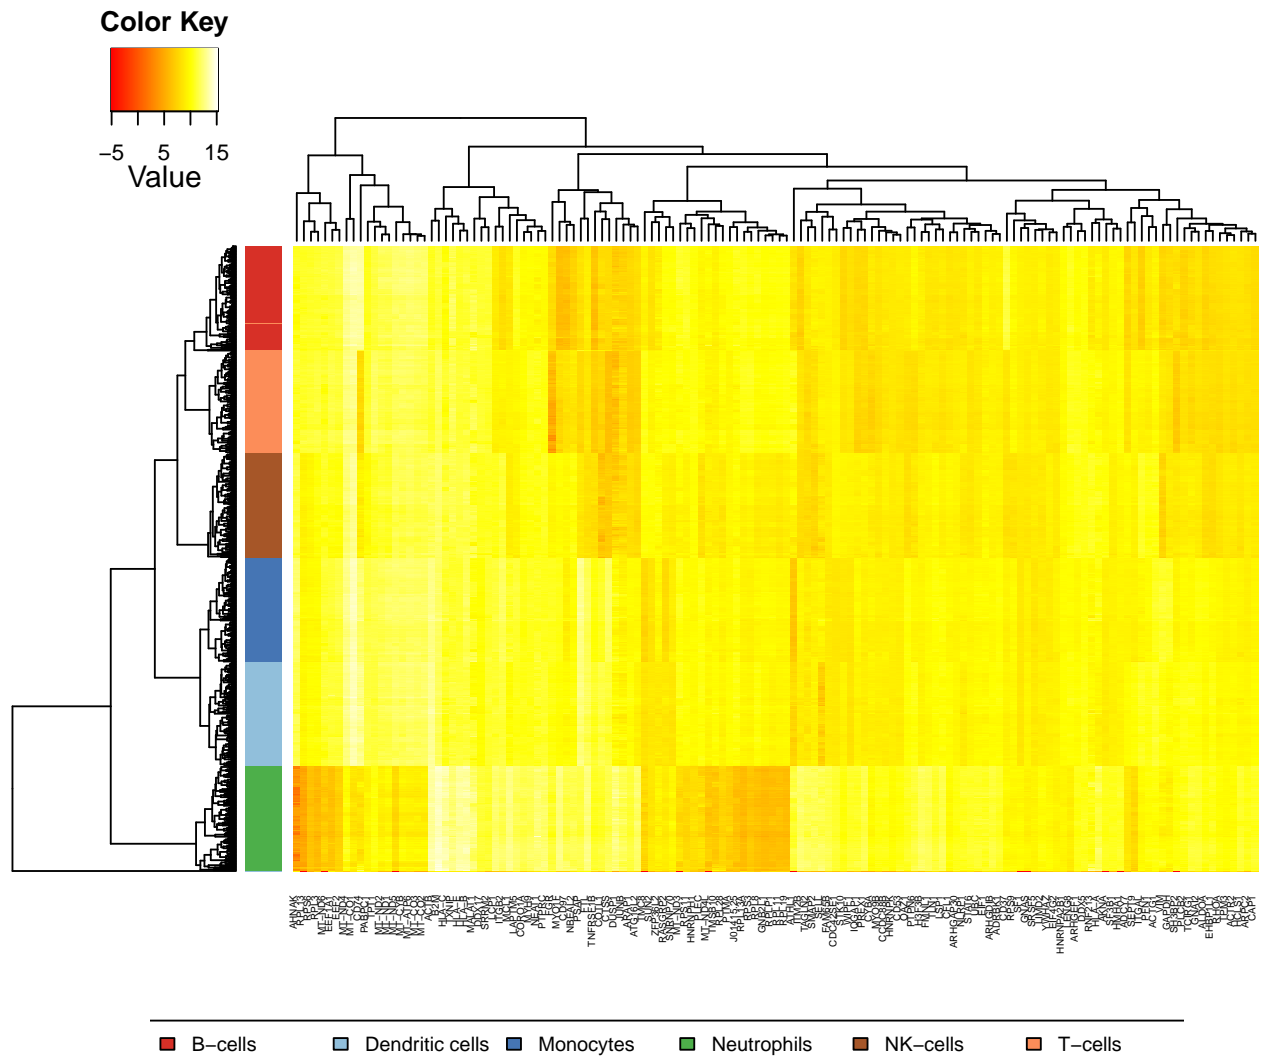

**Figure A31:** Heatmap of  $\log_2$  cpm (RNA-Seq, top-ranking 136 genes, n=839). Euclidean distances hierarchically clustered using the complete linkage clustering algorithm. Top-ranking genes were selected by selecting the upper 10th percentile of genes ranked by descending sum of lcpm across all 839 samples.

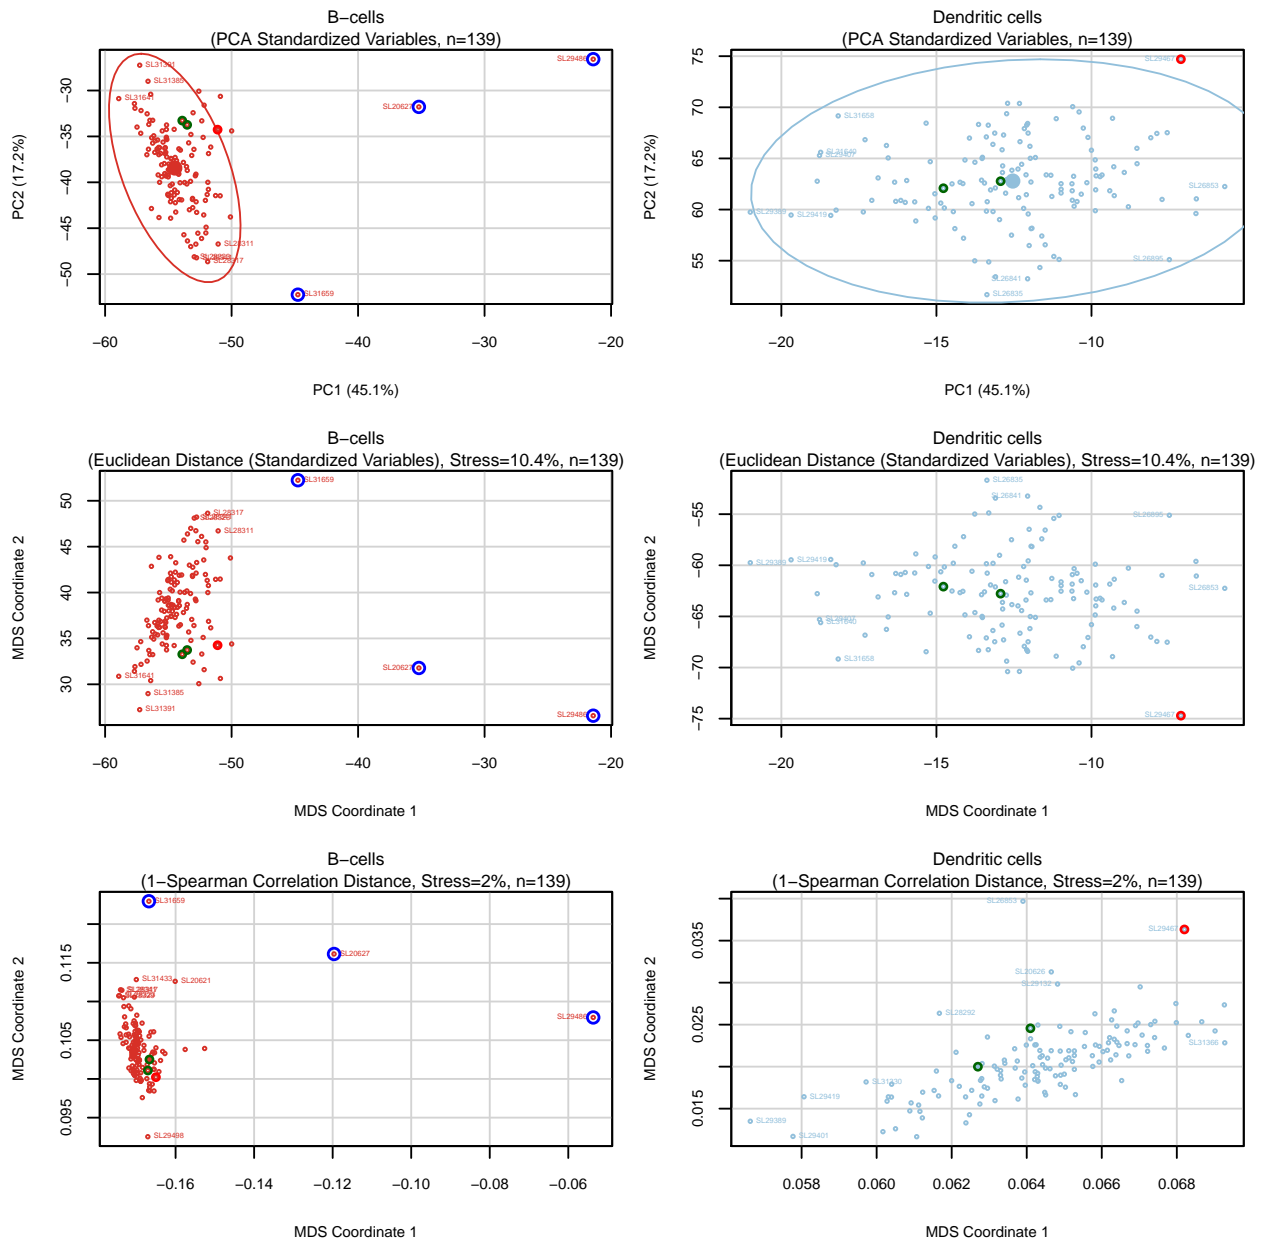

**Figure A32:** PCA and non-metric multidimensional scaling biplots (RNA-Seq, B-cells and Dendritic cells, n=140). PCA biplots with bivariate 99.6% confidence ellipses for standardized variables are shown at the top. Non-metric MDS results for standardized variables and pairwise differences based on Euclidean distance are shown in the middle. Non-metric MDS results for original variables based on 1-Spearman correlation distance are shown at the bottom. Strong outliers are highlighted in blue. Samples belonging to subject H (Day -28) are highlighted in red. Samples belonging to subject H (Day -14 and Day 0) are highlighted in green. Labels for the 10 most outlying samples per cell type based on maximum Mahalanobis distance are shown.

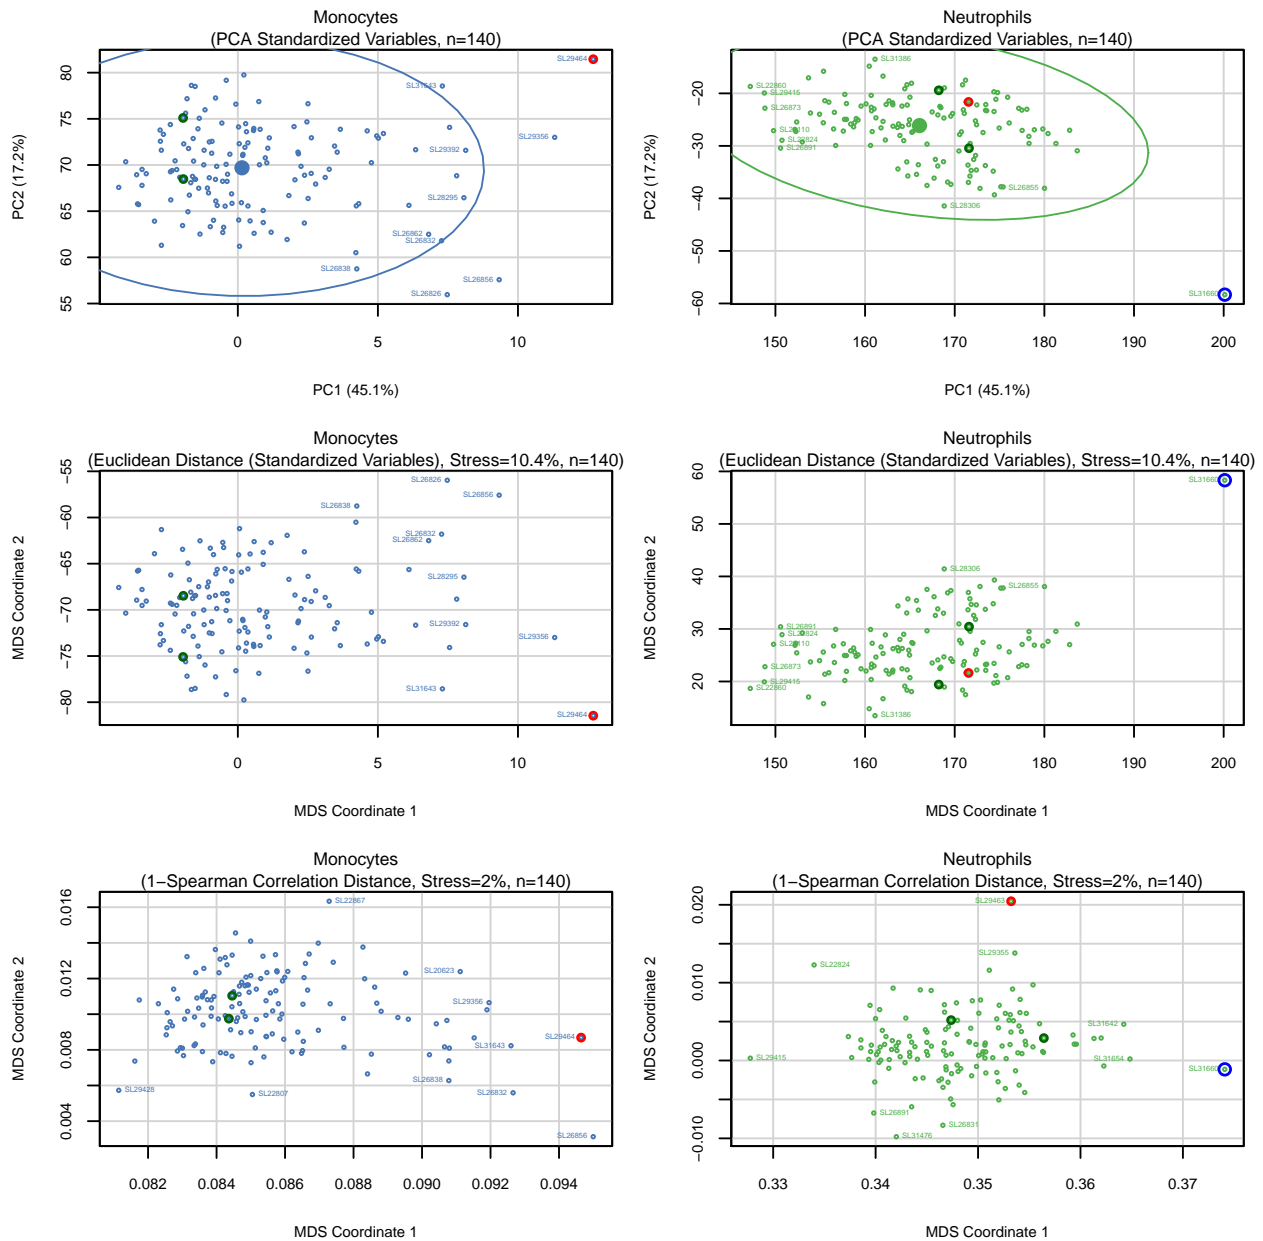

**Figure A33:** PCA and non-metric multidimensional scaling biplots (RNA-Seq, Monocytes and Neutrophils, n=140). PCA biplots with bivariate 99.6% confidence ellipses for standardized variables are shown at the top. Non-metric MDS results for standardized variables and pairwise differences based on Euclidean distance are shown in the middle. Non-metric MDS results for original variables based on 1-Spearman correlation distance are shown at the bottom. Strong outliers are highlighted in blue. Samples belonging to subject H (Day -28) are highlighted in red. Samples belonging to subject H (Day -14 and Day 0) are highlighted in green. Labels for the 10 most outlying samples per cell type based on maximum Mahalanobis distance are shown.

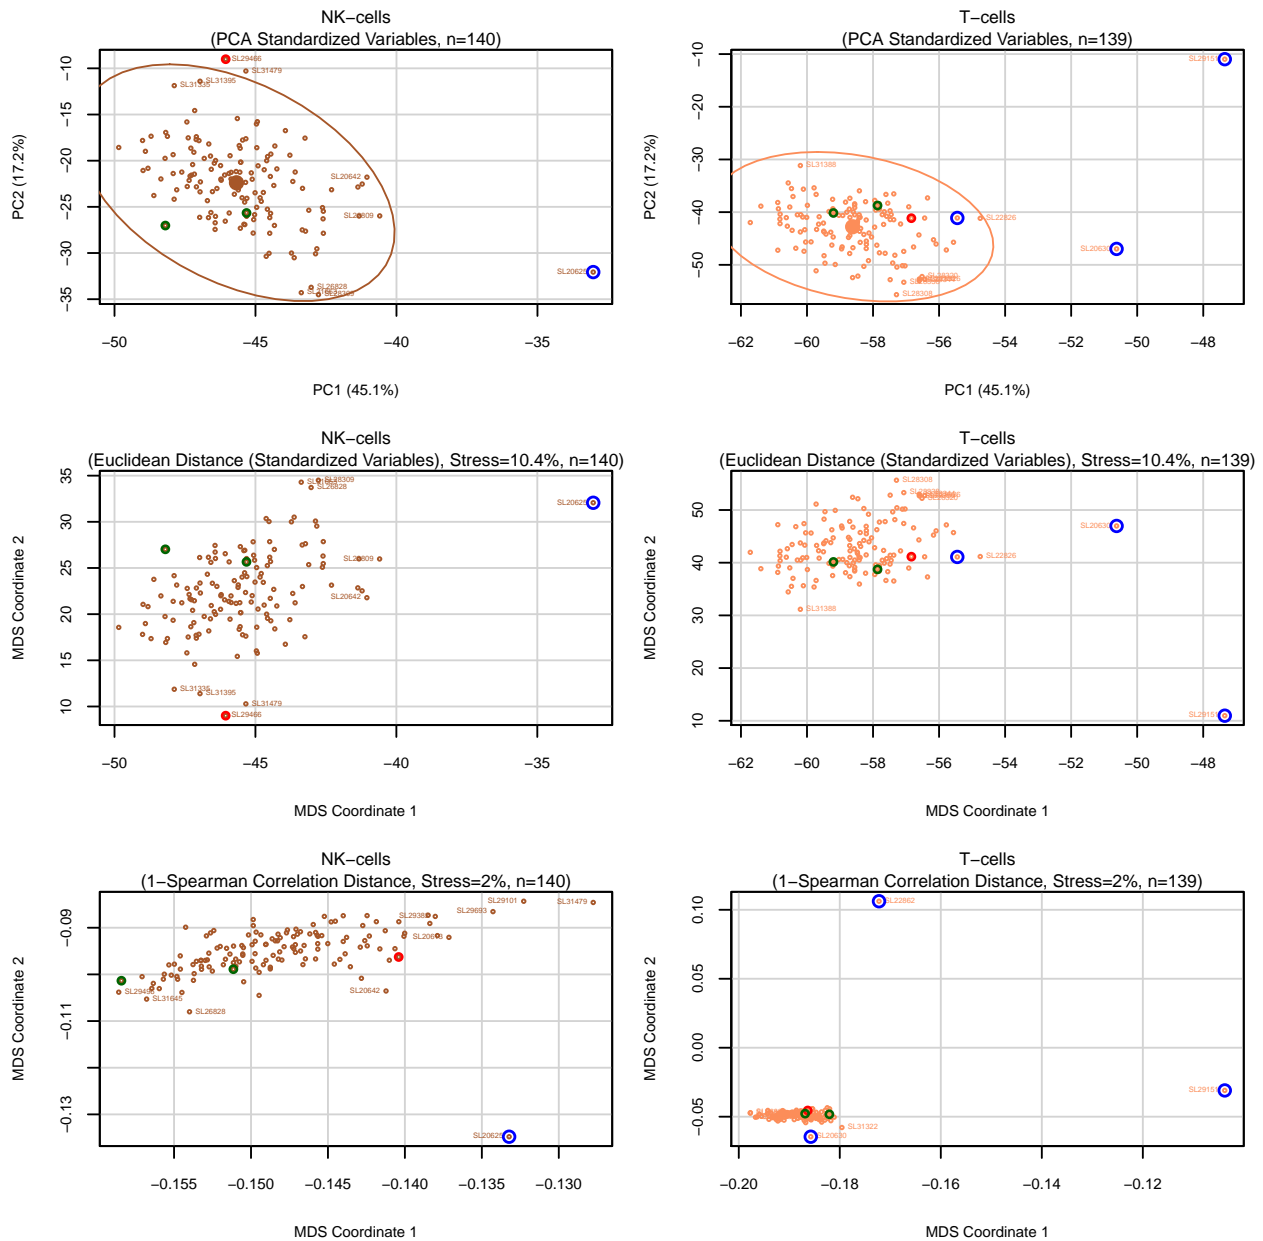

**Figure A34:** PCA and non-metric multidimensional scaling biplots (RNA-Seq, NK-cells and T-cells, n=140). PCA biplots with bivariate 99.6% confidence ellipses for standardized variables are shown at the top. Non-metric MDS results for standardized variables and pairwise differences based on Euclidean distance are shown in the middle. Non-metric MDS results for original variables based on 1-Spearman correlation distance are shown at the bottom. Strong outliers are highlighted in blue. Samples belonging to subject H (Day -28) are highlighted in red. Samples belonging to subject H (Day -14 and Day 0) are highlighted in green. Labels for the 10 most outlying samples per cell type based on maximum Mahalanobis distance are shown.

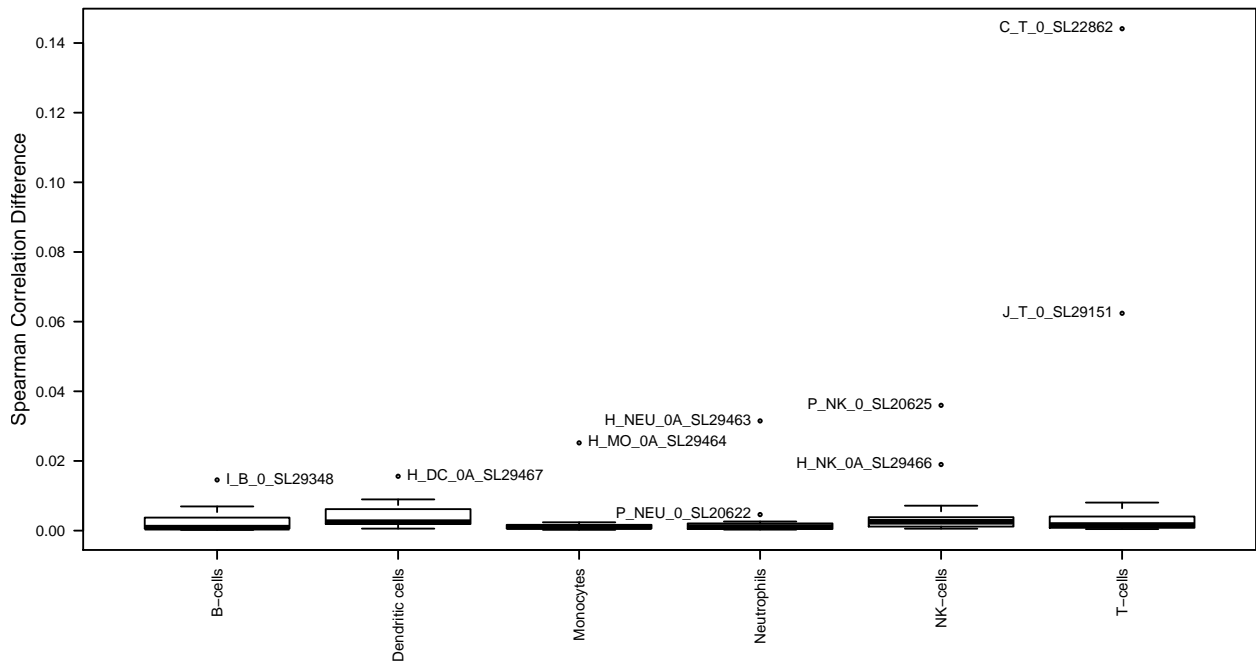

**Figure A35:** Boxplots summarizing the difference between maximum and minimum Spearman correlation among baseline samples (Day -28, Day -14, Day 0) for each cell type and subject (RNA-Seq, n=20).

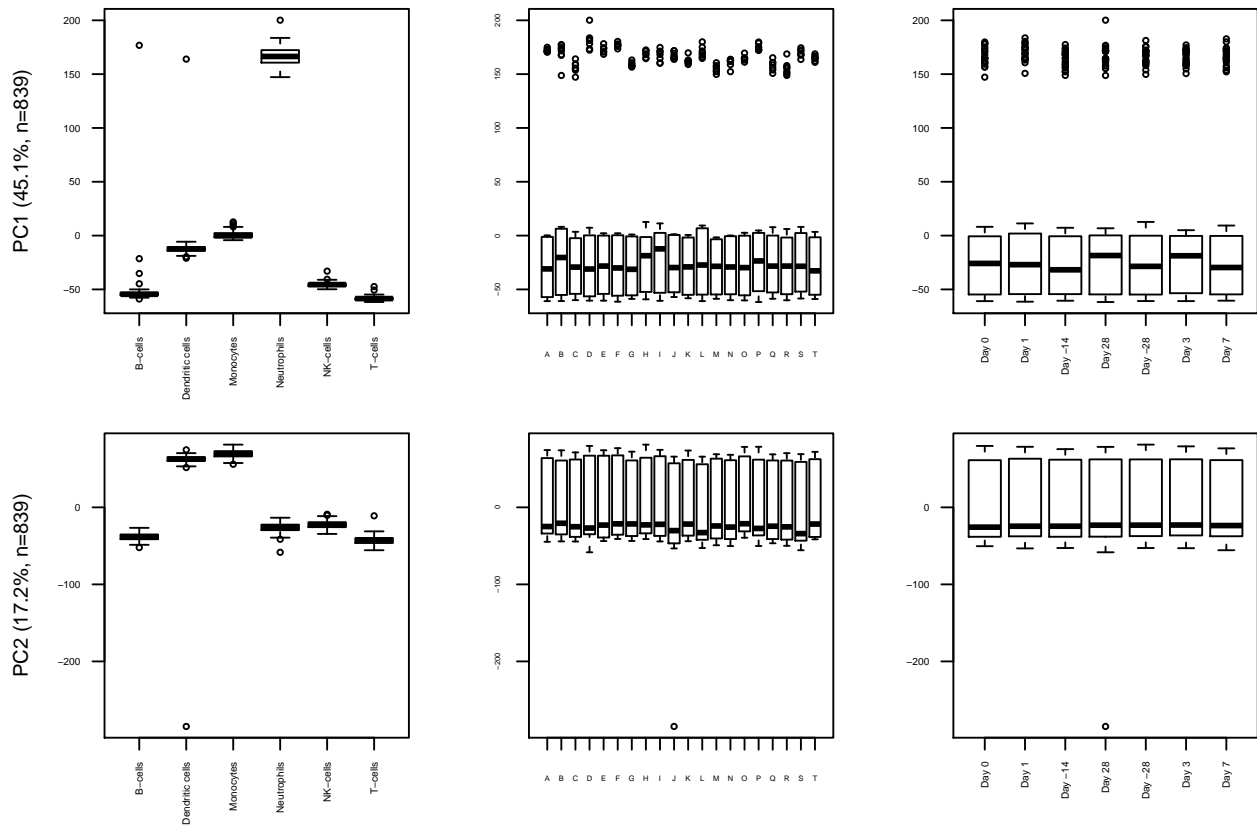

Figure A36: Variance component plots (RNA-Seq, n=839, PC1 and PC2).

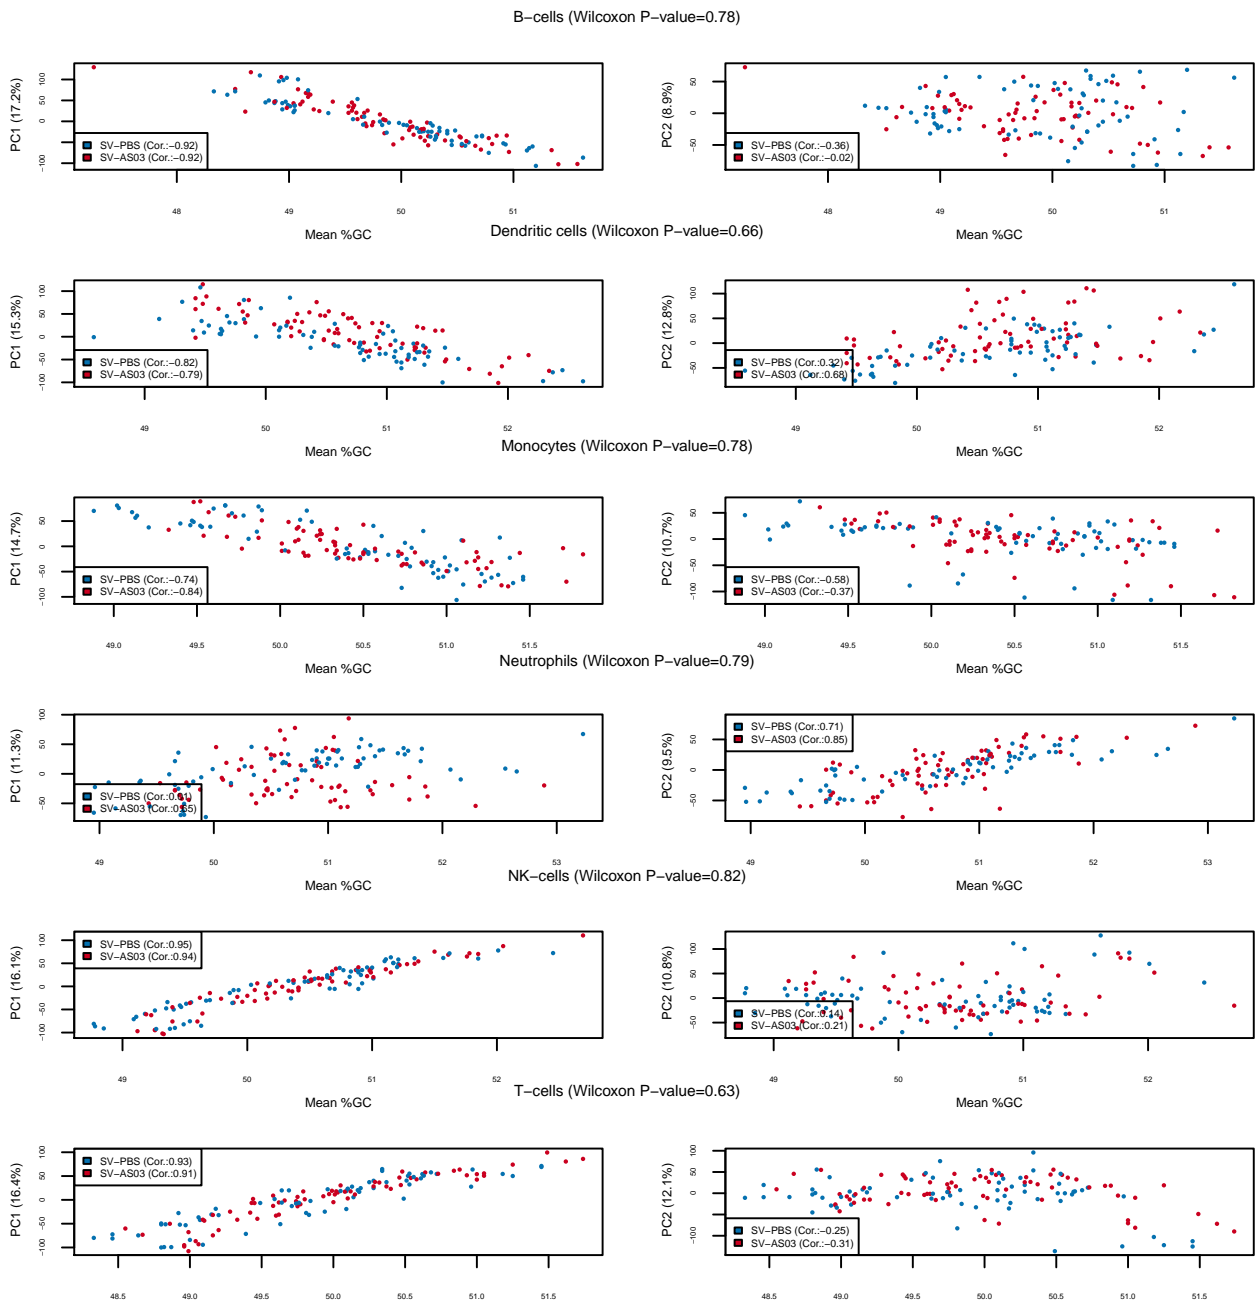

**Figure A37:** Correlation with mean %GC content. Wilcoxon Rank-Sum test P-value for comparing mean %GC content between treatments is shown in the header for each cell subset (RNA-Seq).

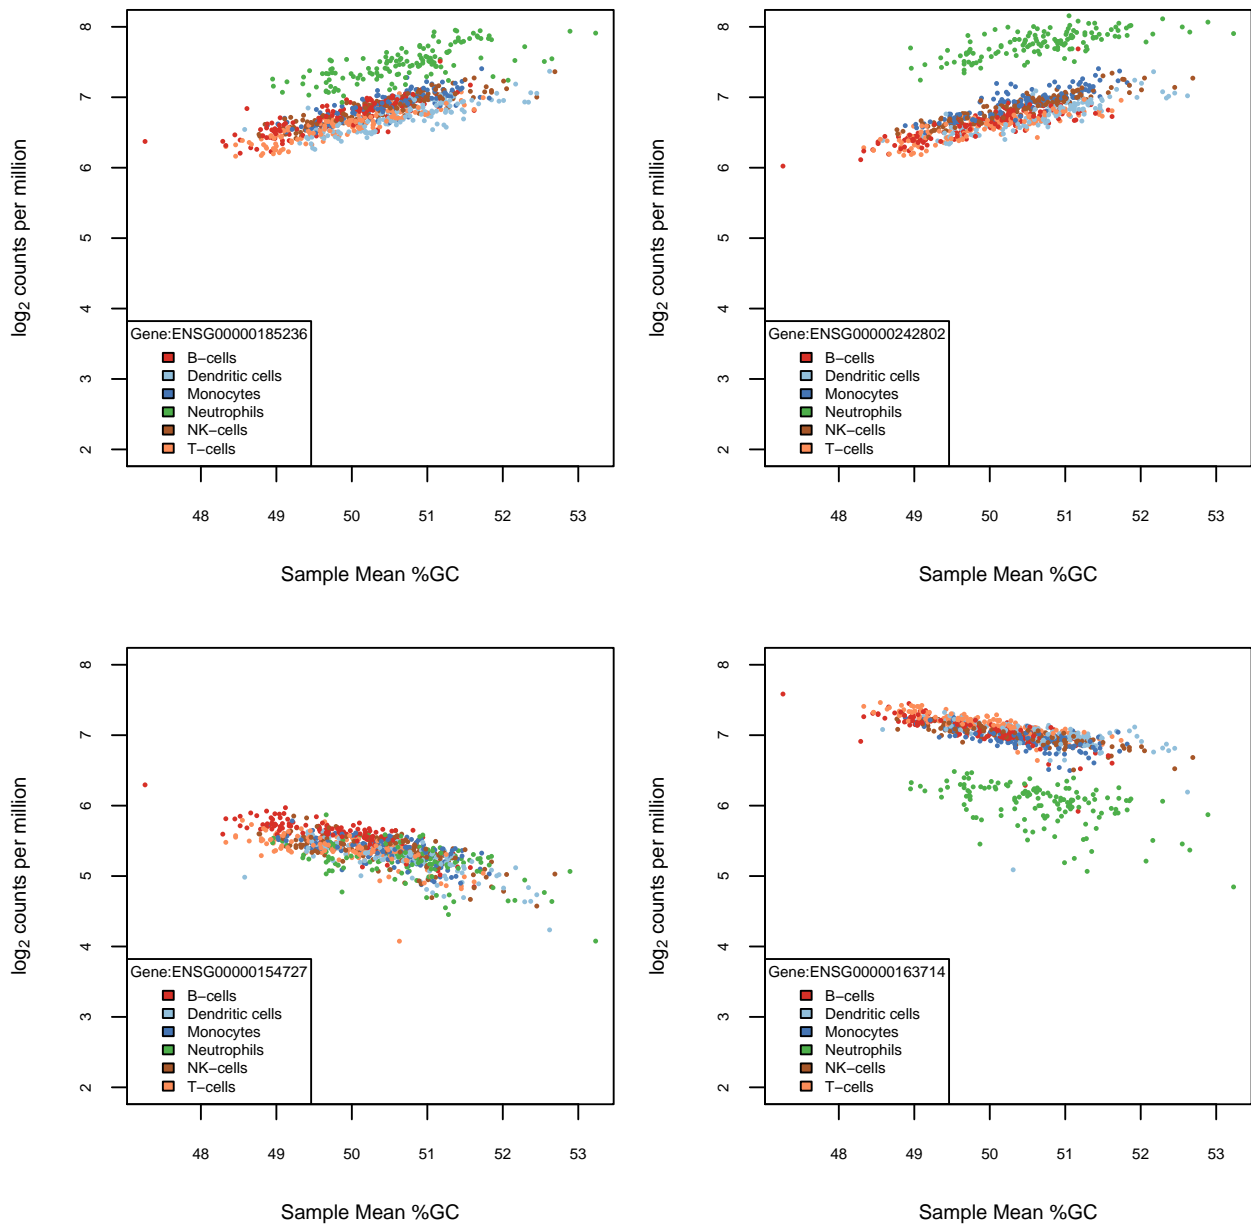

**Figure A38:** Example genes with strong mean %GC content association (RNA-Seq).



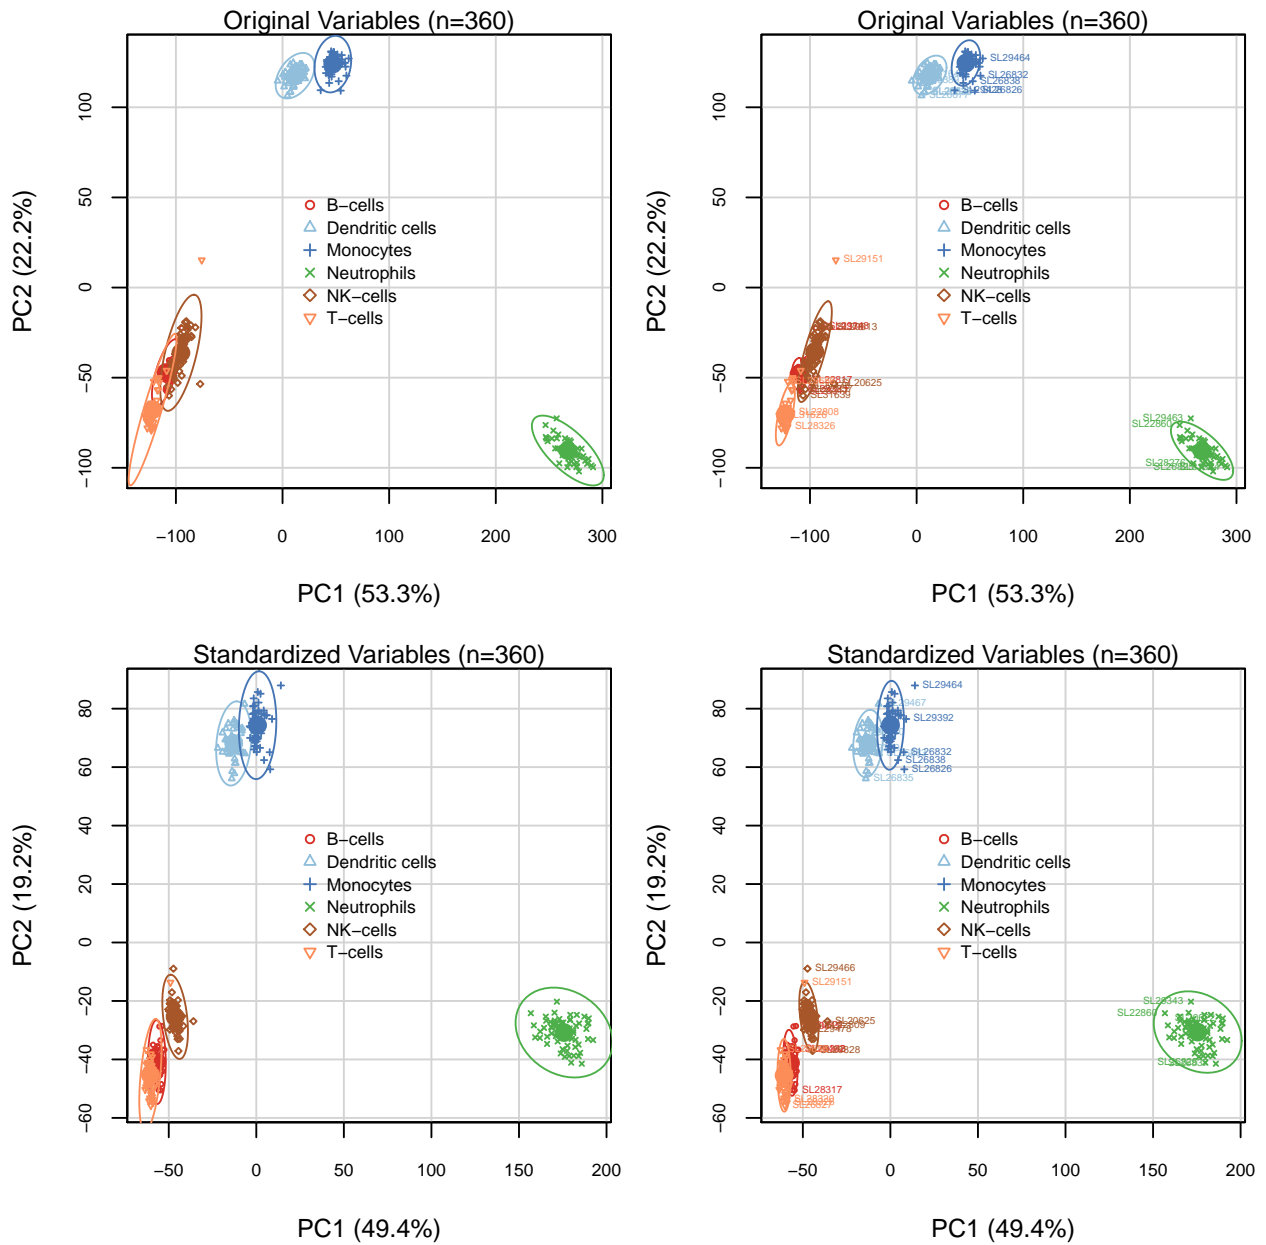

**Figure A39:** Baseline PCA biplots (RNA-Seq, n=360). 99.2% confidence ellipses are drawn for each cell type. The right panels are identical to the left panels except that they show dataset labels for the three most outlying samples per cell type based on maximum Mahalanobis distance.

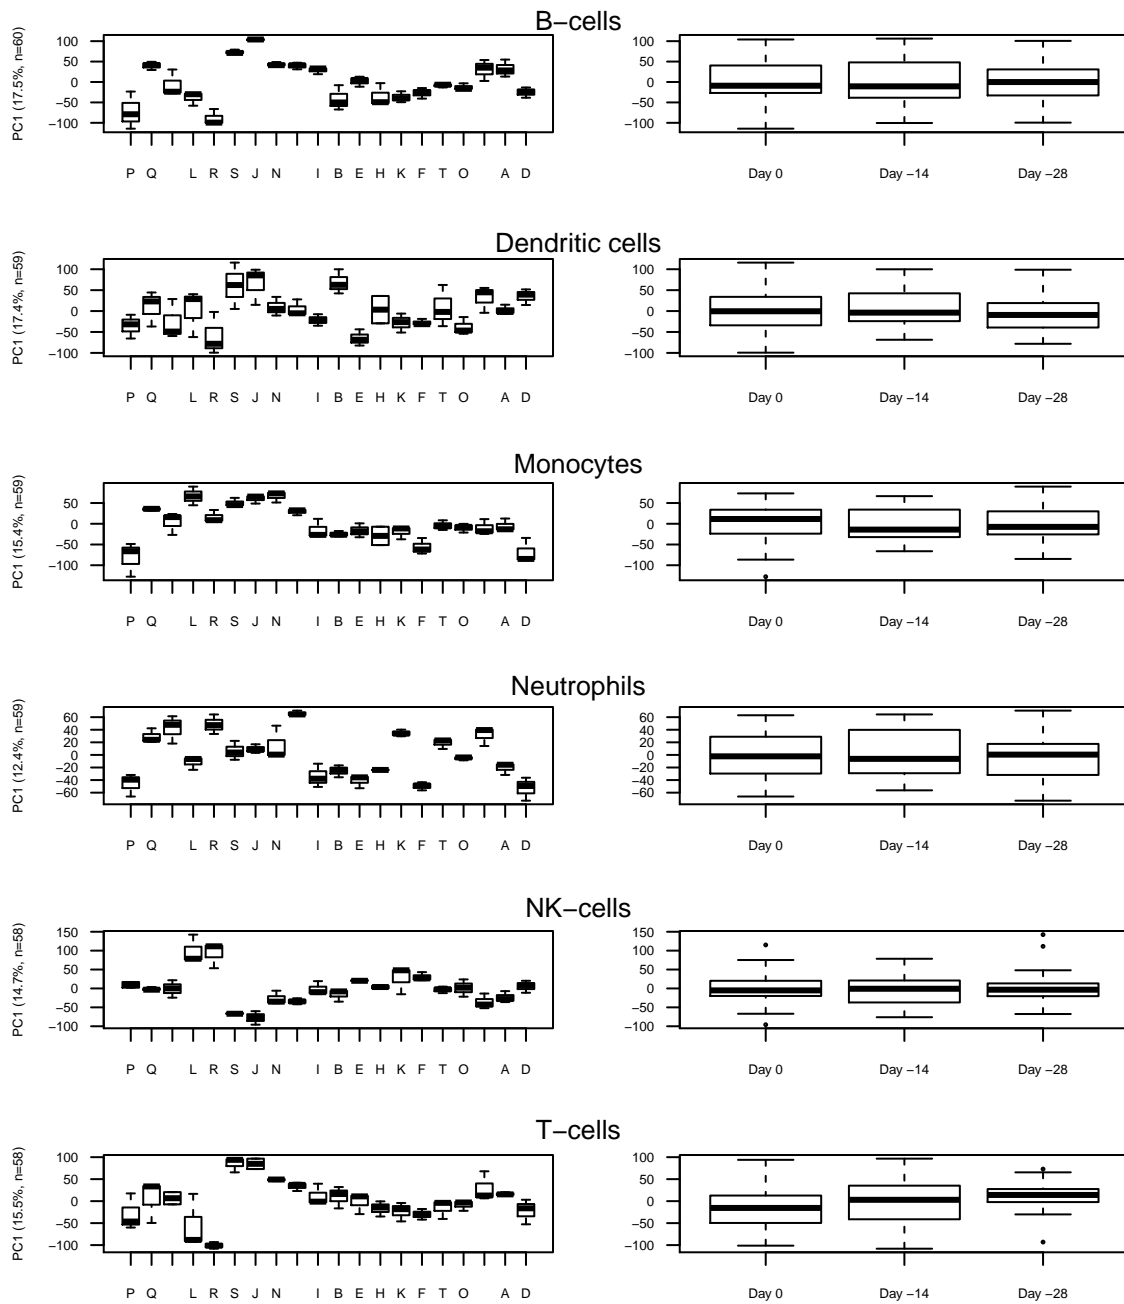

Figure A40: Baseline variance component plots (RNA-Seq, PC1).s

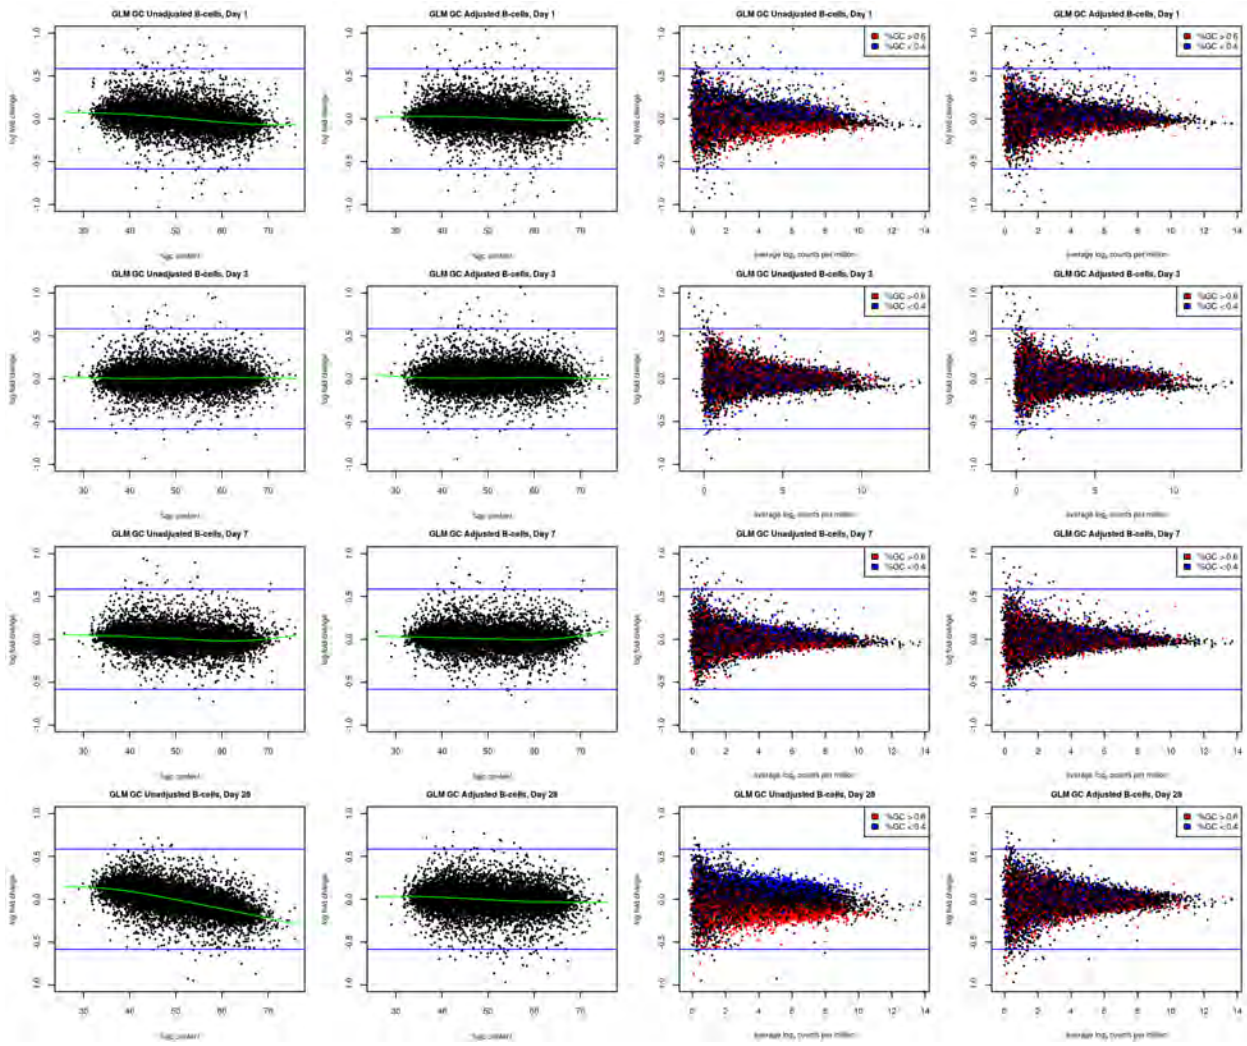

Figure A41: Impact of GC on fold change (RNA-Seq, B-cells).

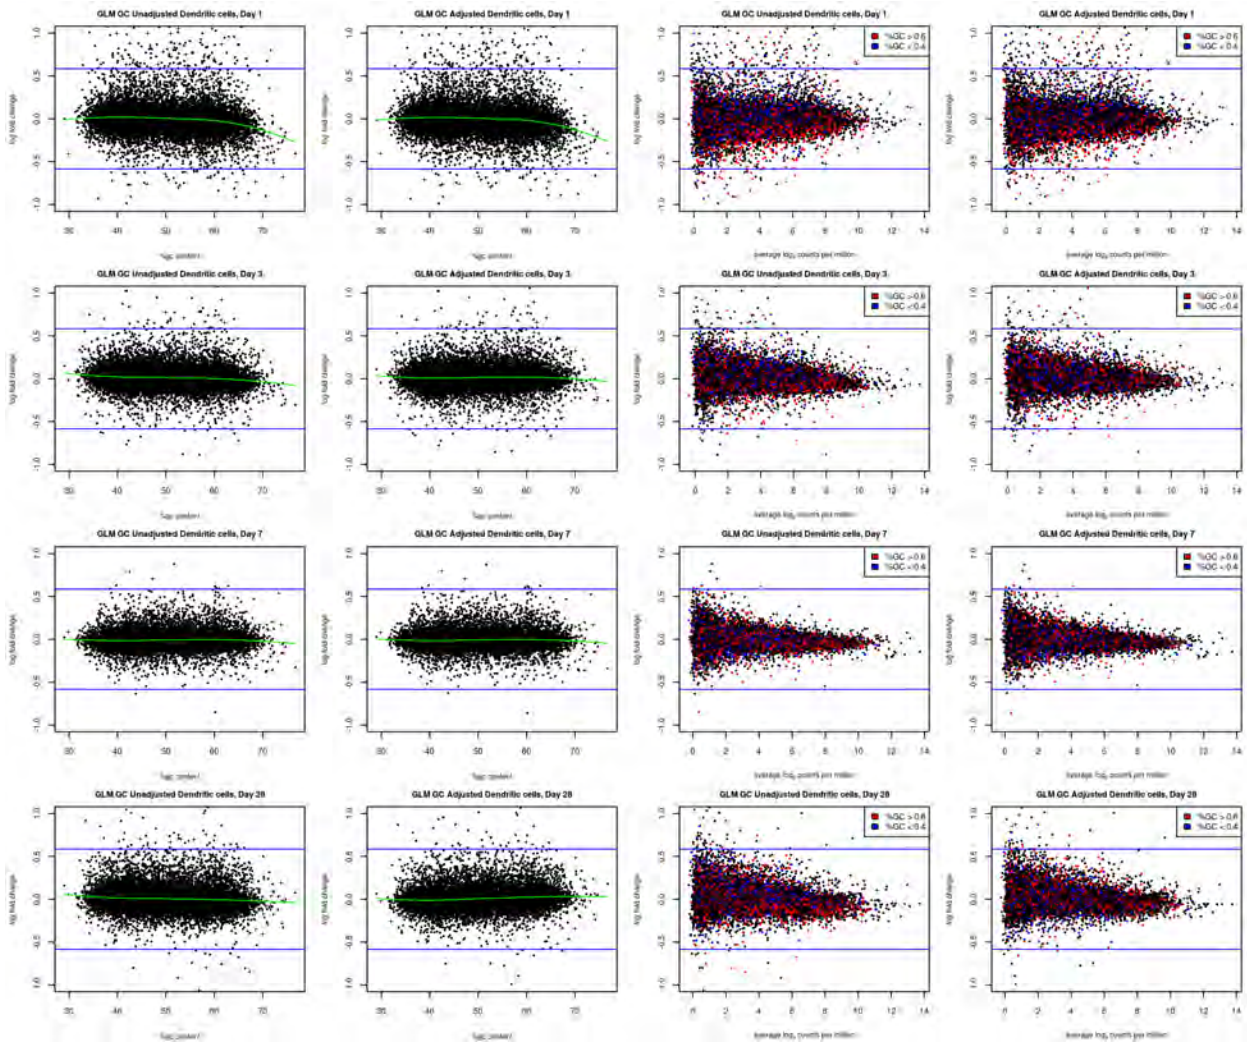

Figure A42: Impact of GC on fold change (RNA-Seq, Dendritic cells).

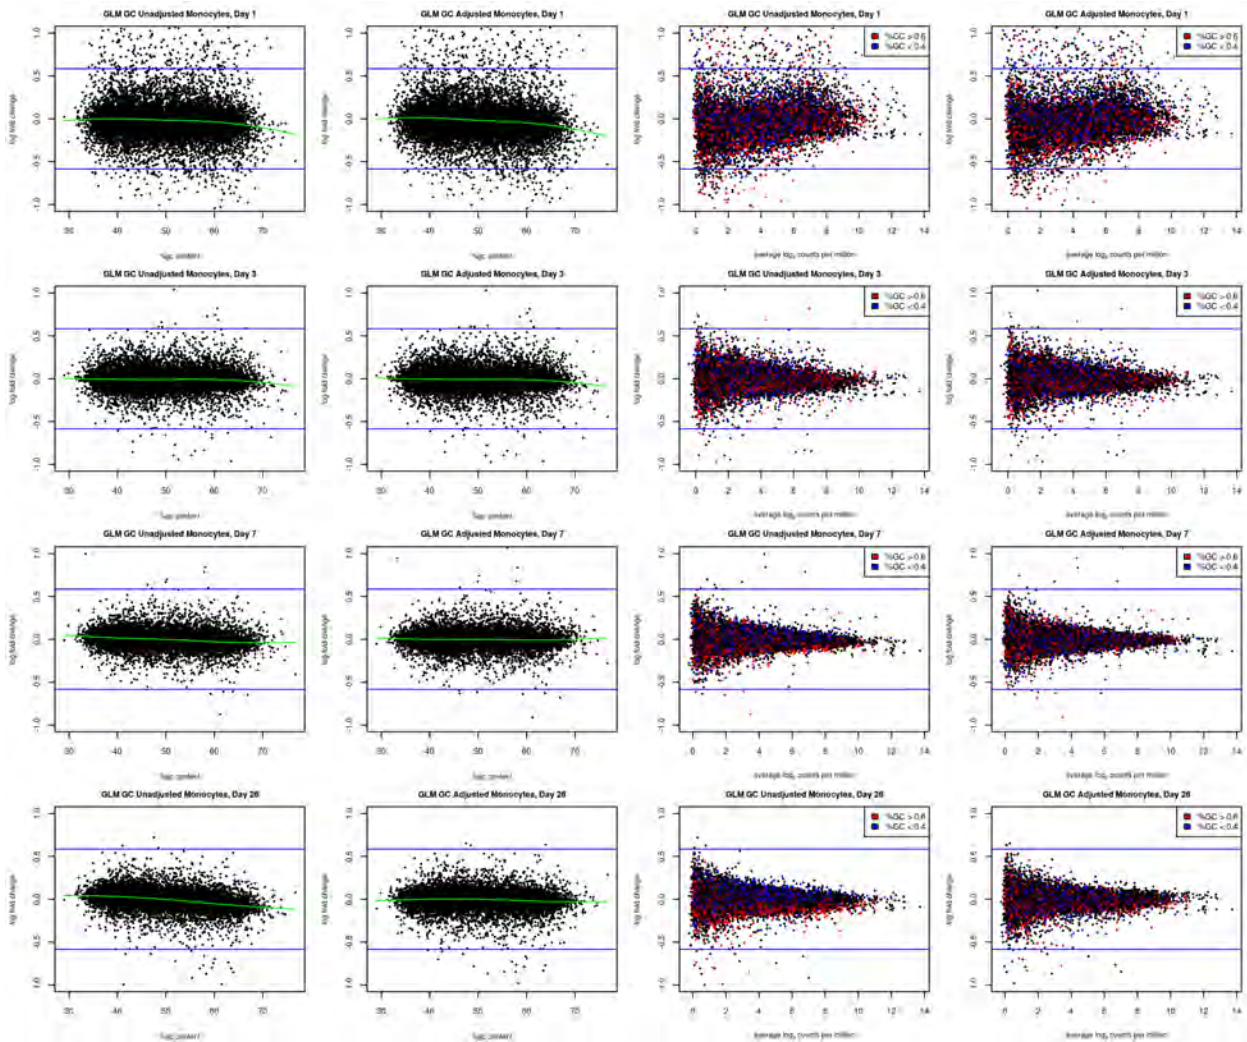

Figure A43: Impact of GC on fold change (RNA-Seq, Monocytes).

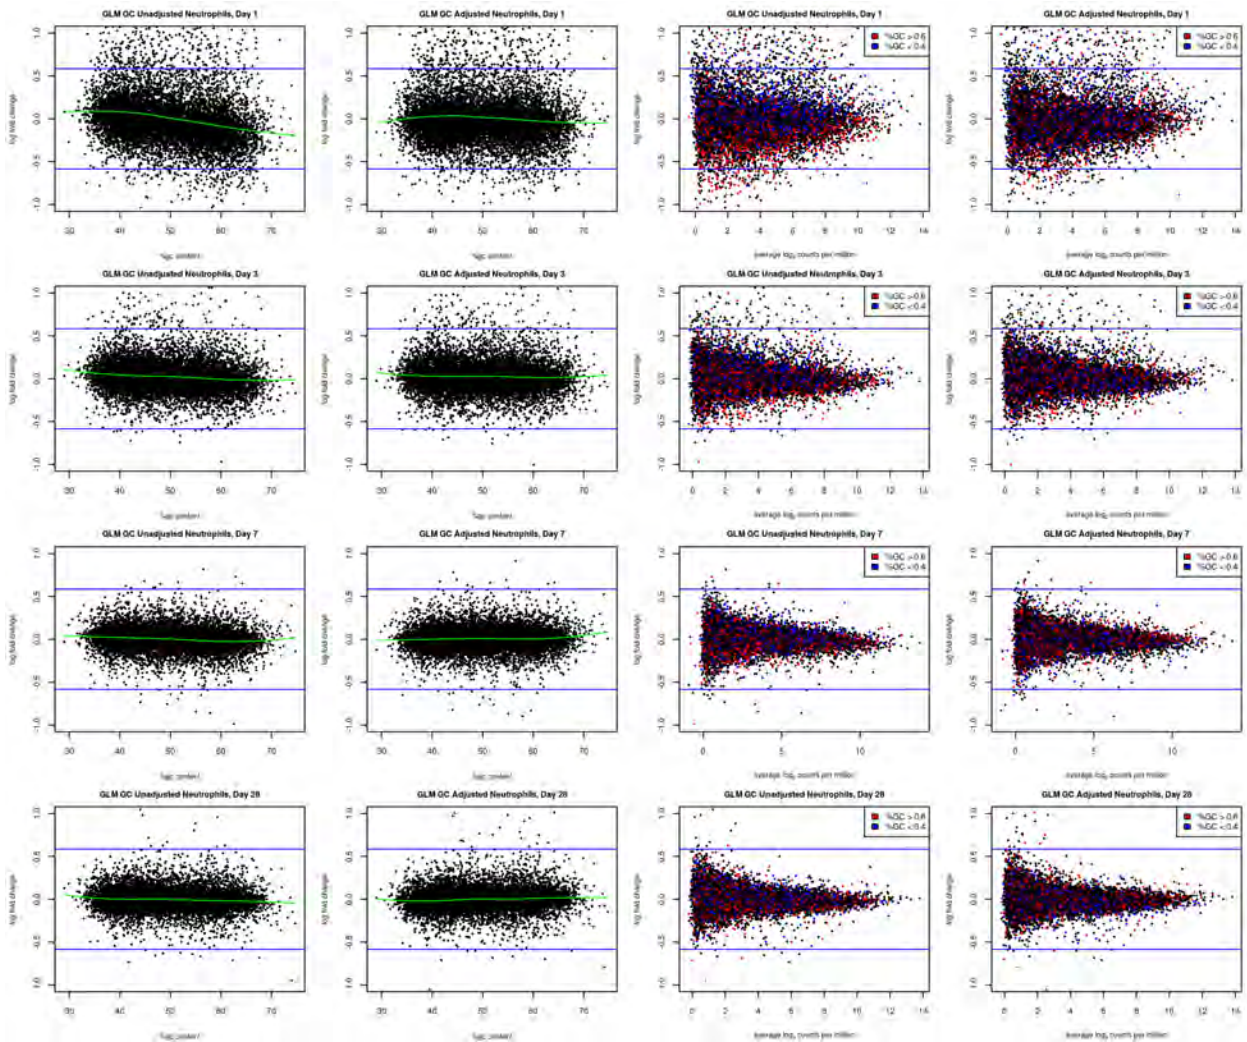

Figure A44: Impact of GC on fold change (RNA-Seq, Neutrophils).

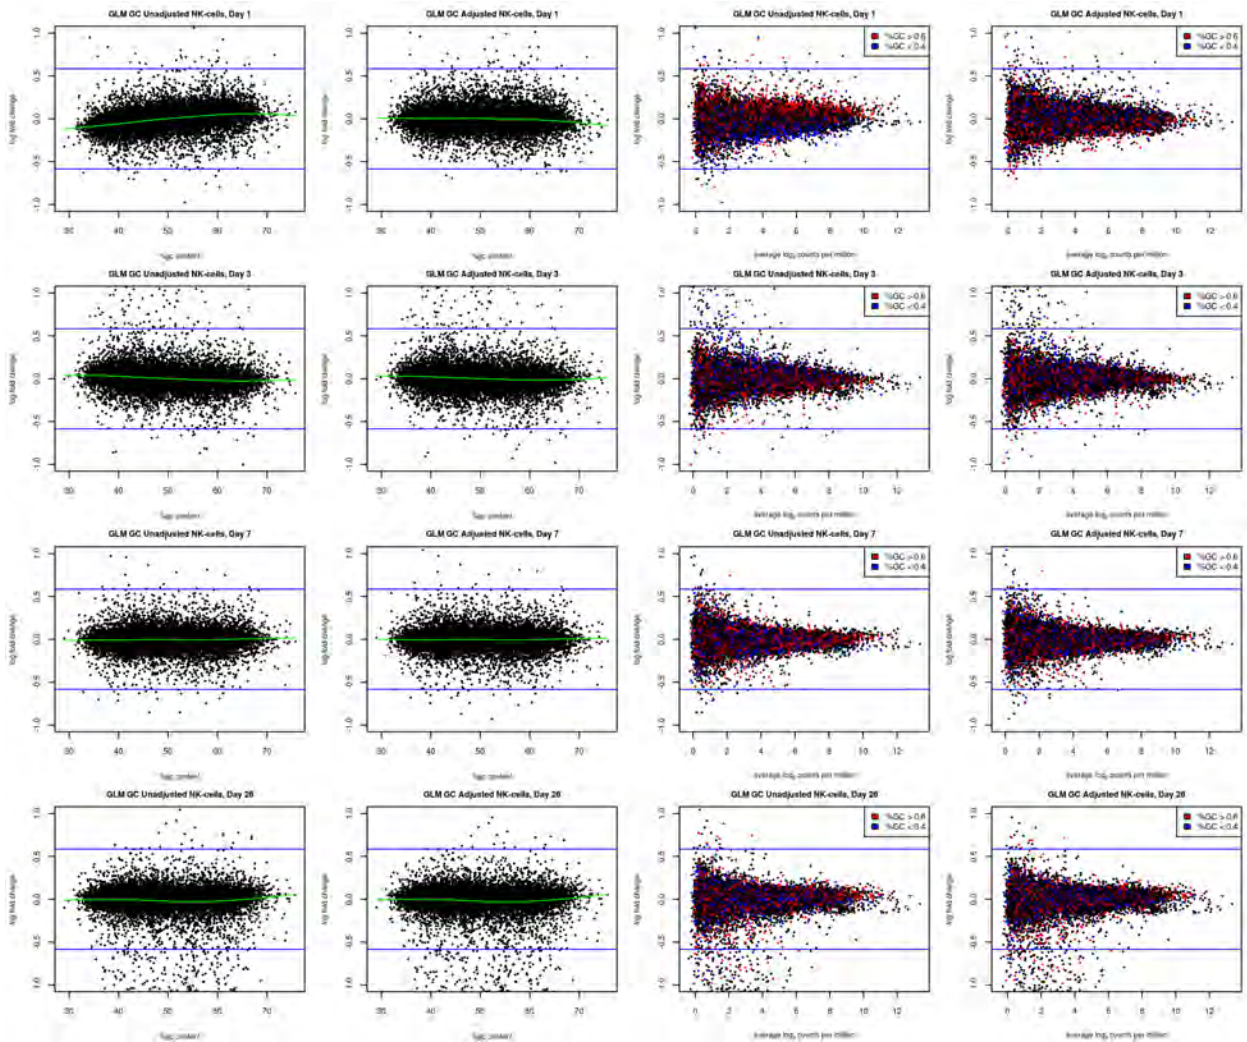

Figure A45: Impact of GC on fold change (RNA-Seq, NK-cells).

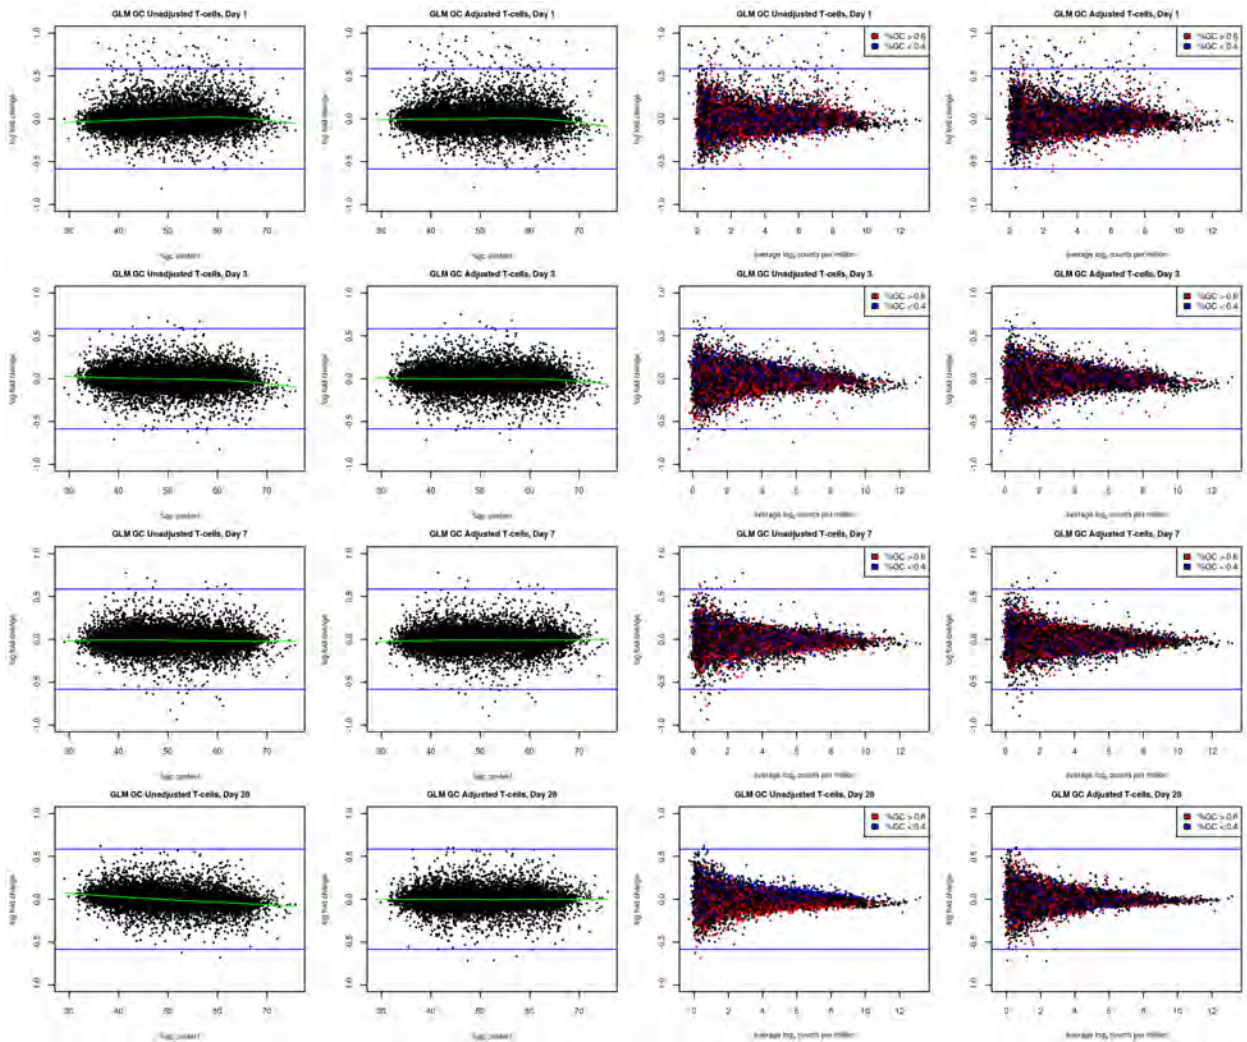

Figure A46: Impact of GC on fold change (RNA-Seq, T-cells).





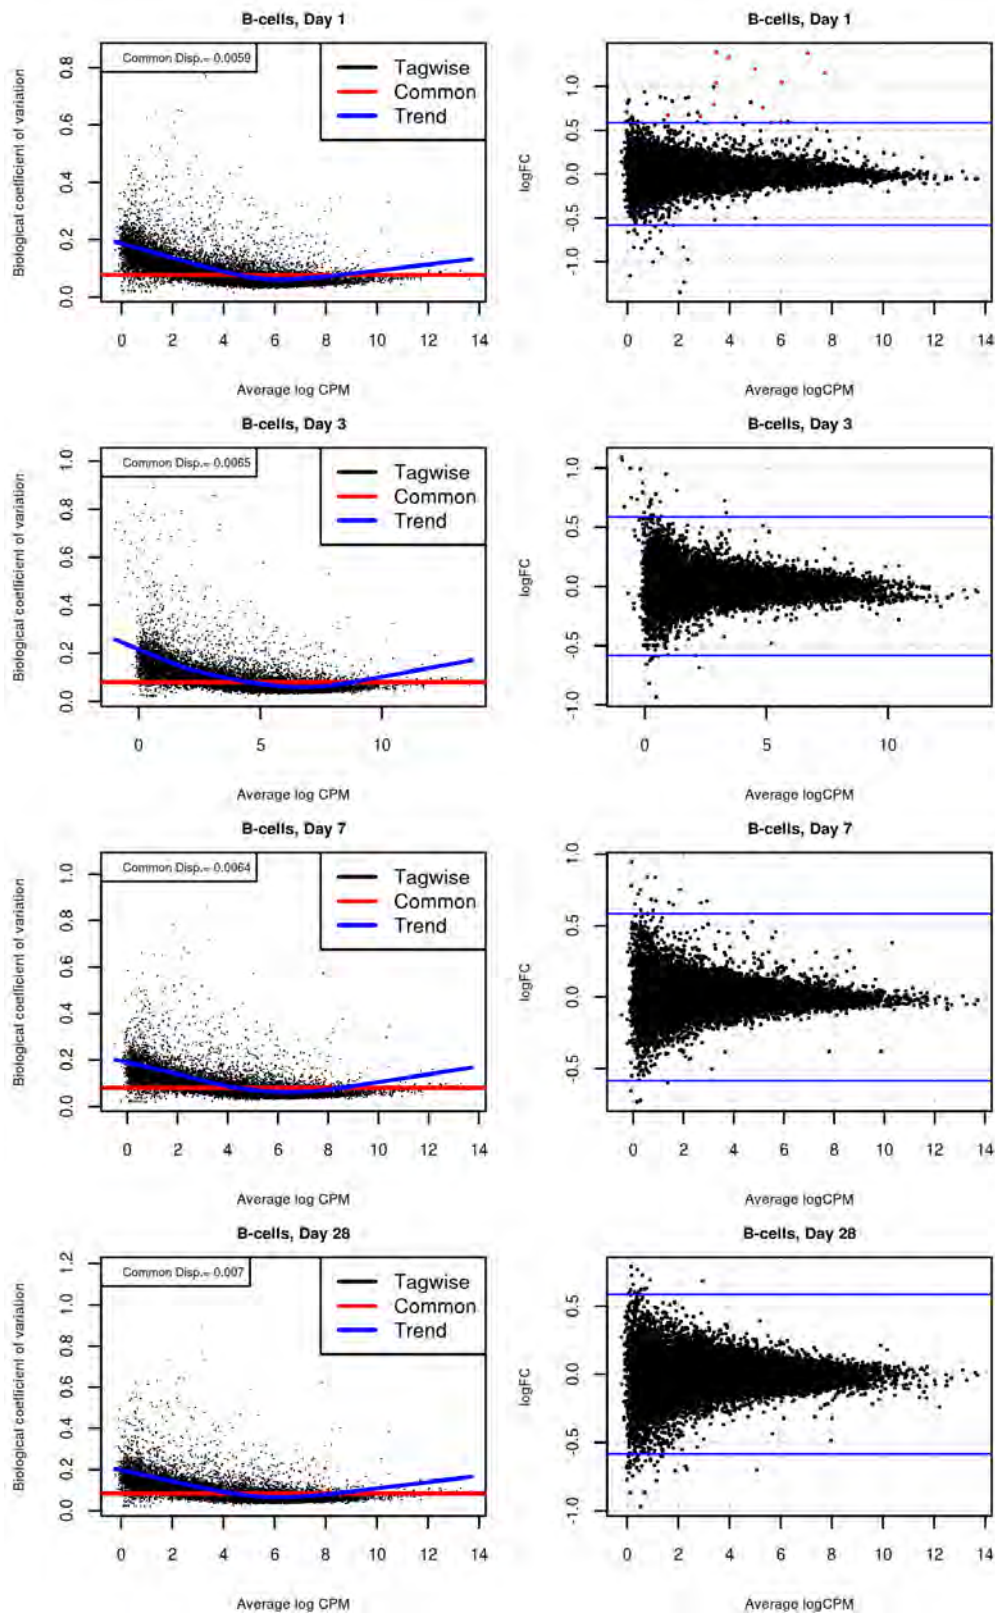

Figure A47: Model QC summary plots (RNA-Seq, B-cells).

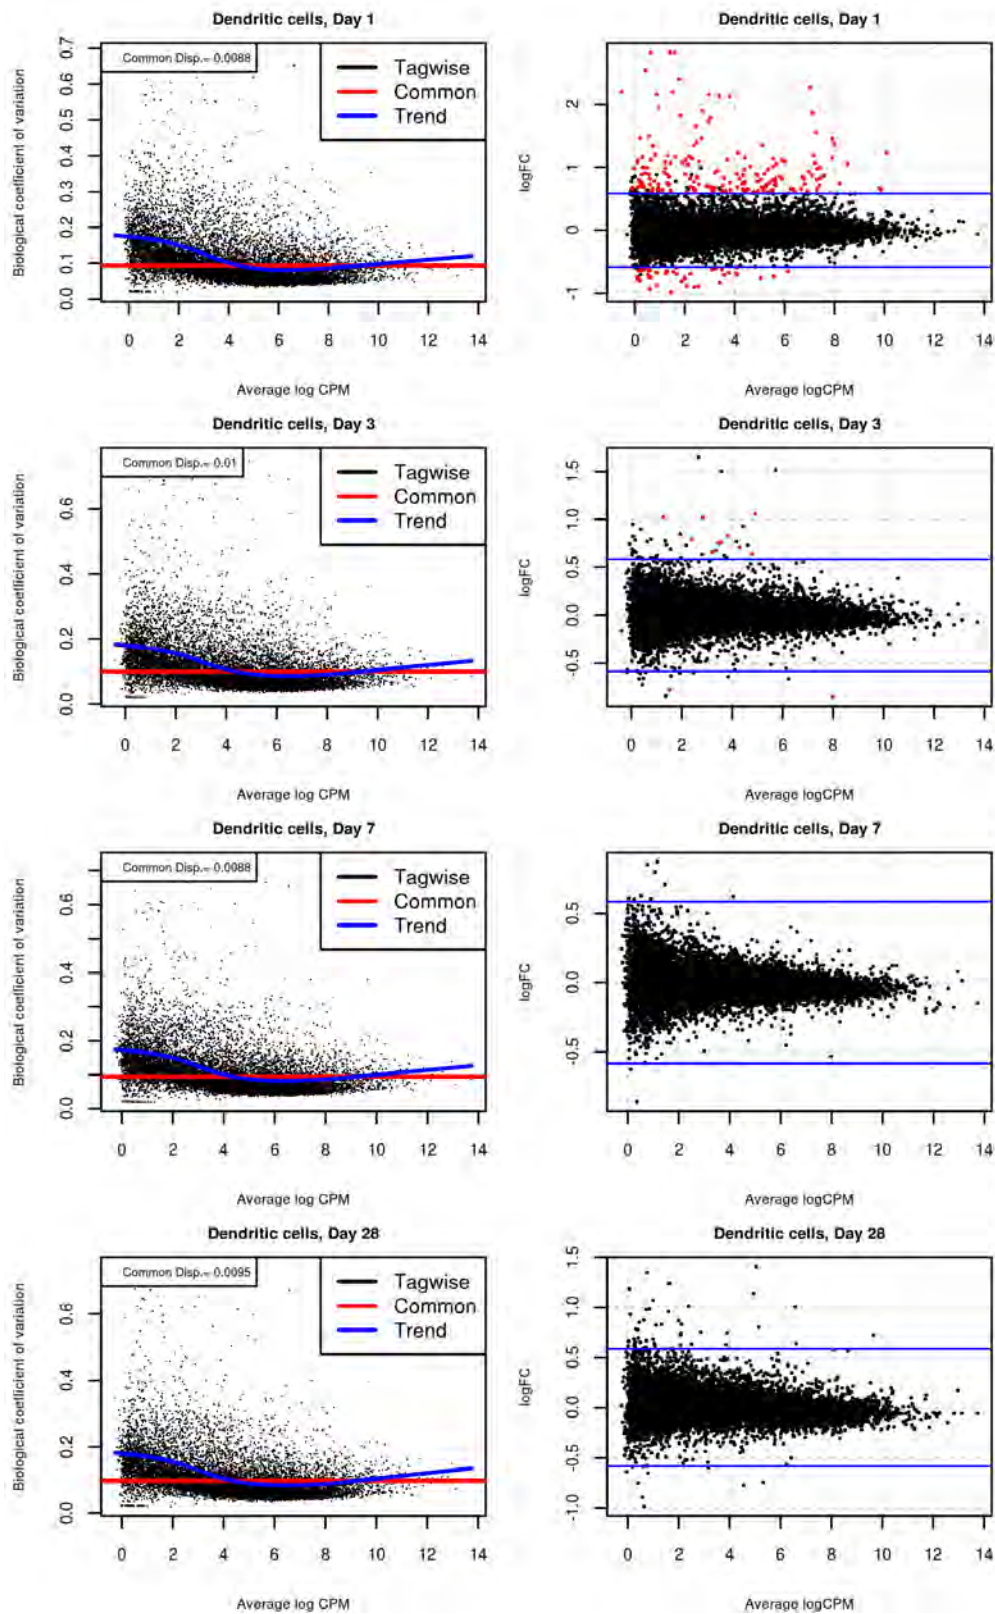

Figure A48: Model QC summary plots (RNA-Seq, Dendritic cells).

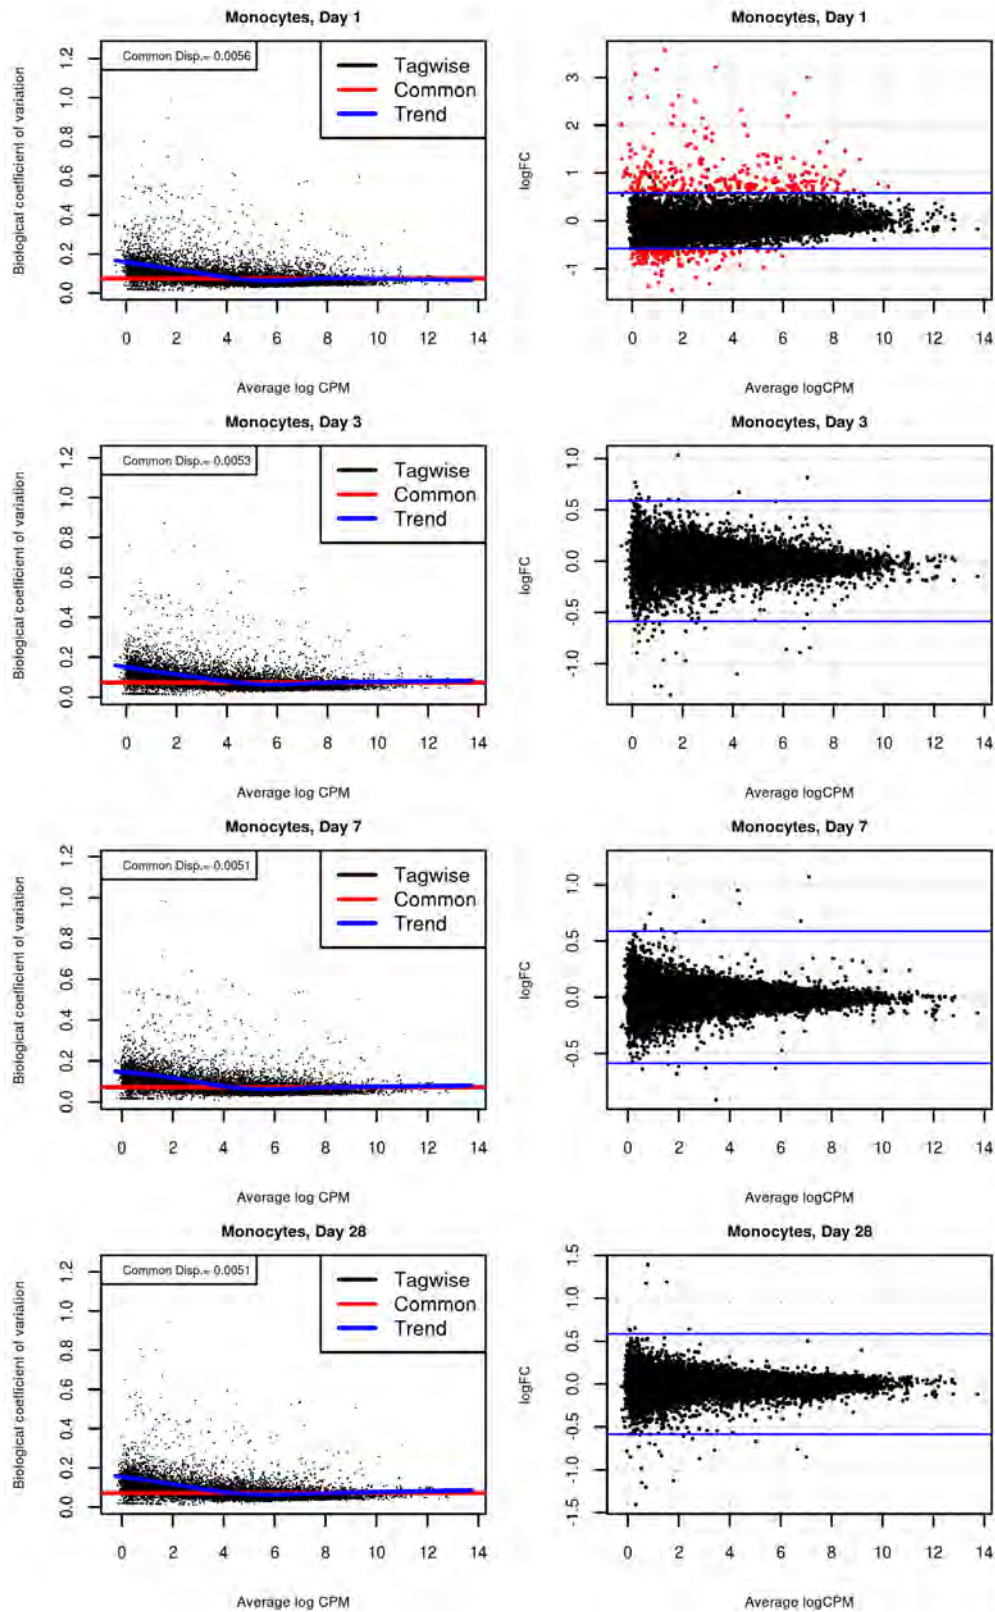

Figure A49: Model QC summary plots (RNA-Seq, Monocytes).

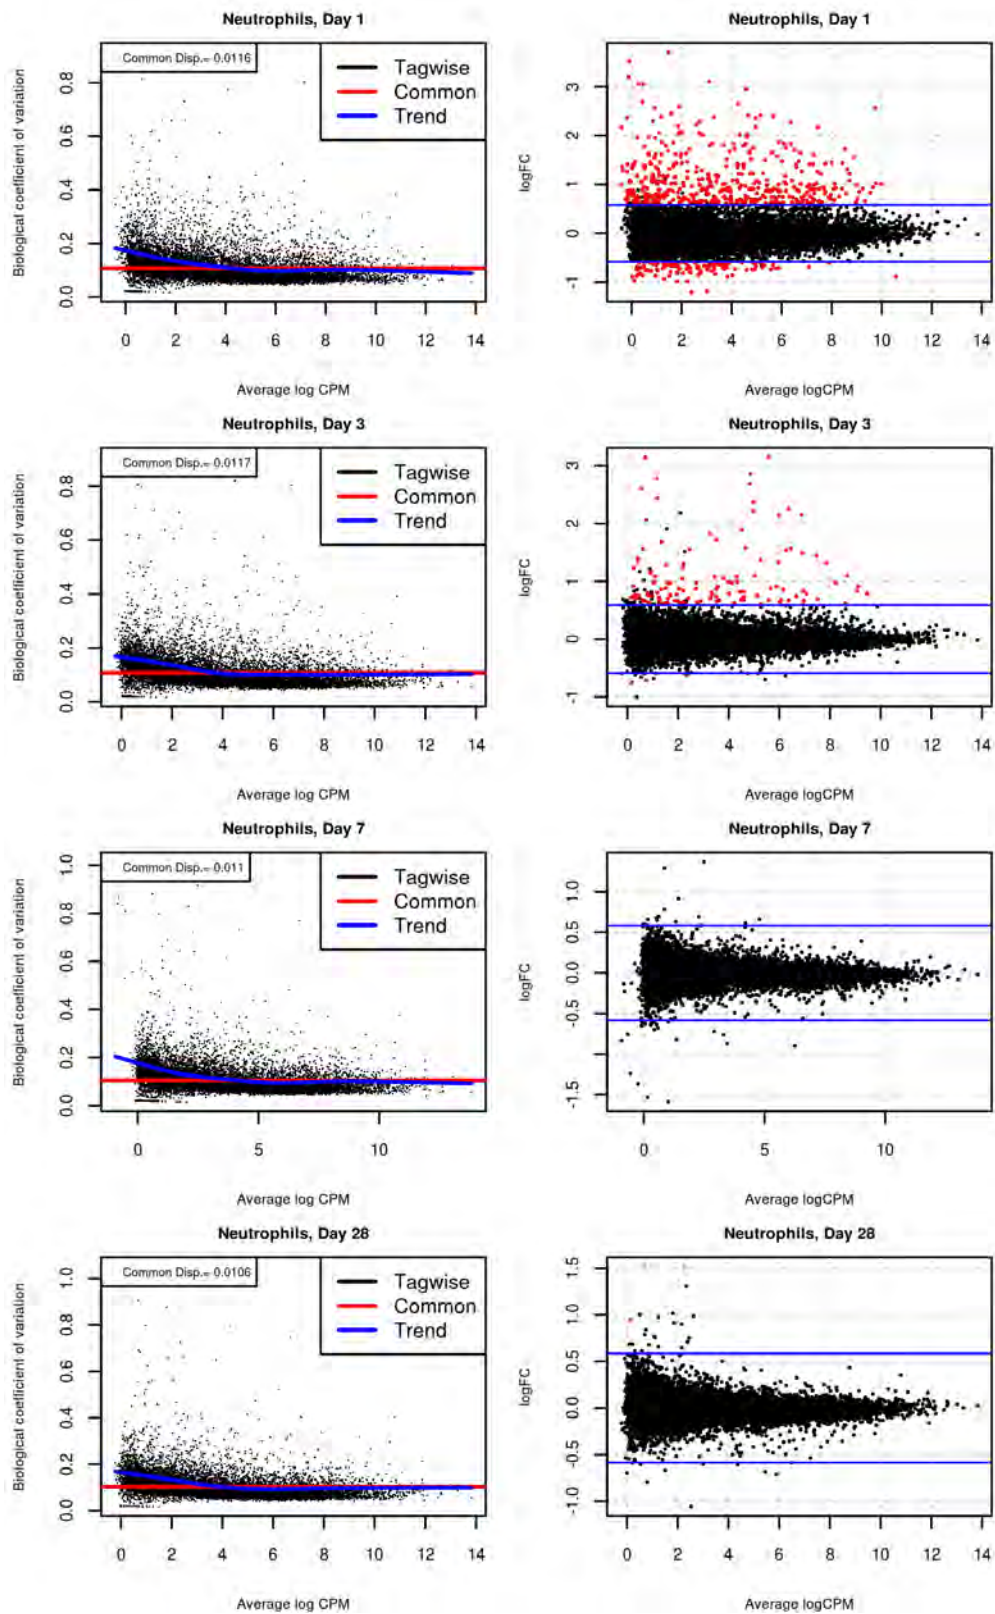

Figure A50: Model QC summary plots (RNA-Seq, Neutrophils).

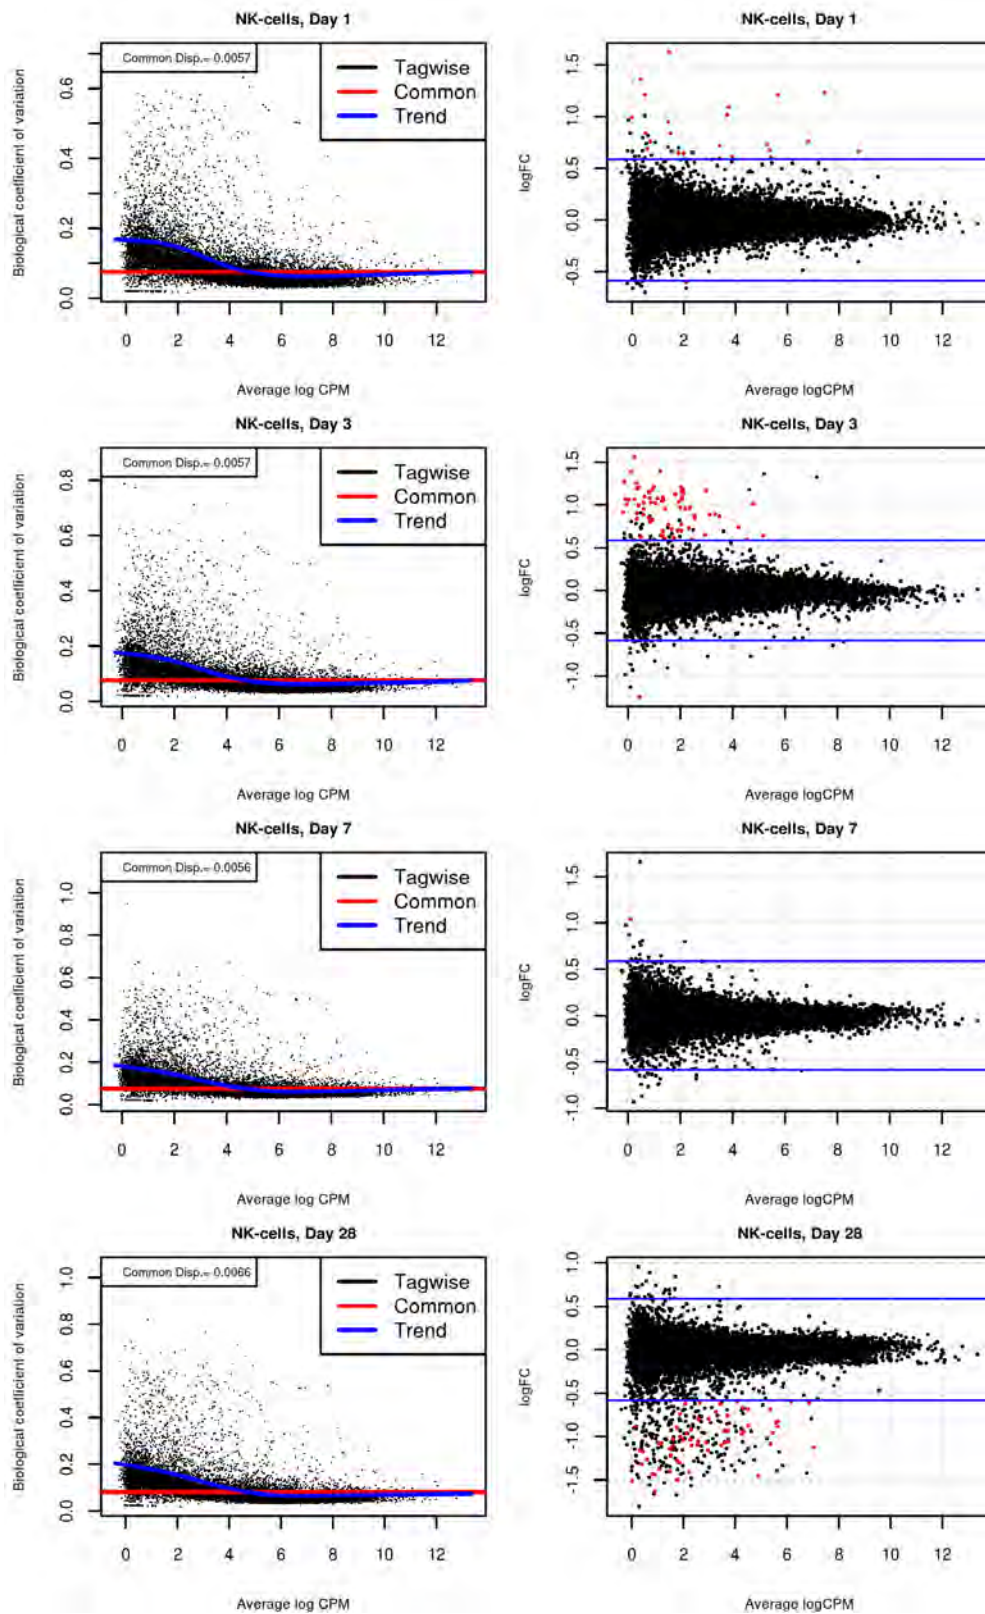

Figure A51: Model QC summary plots (RNA-Seq, NK-cells).

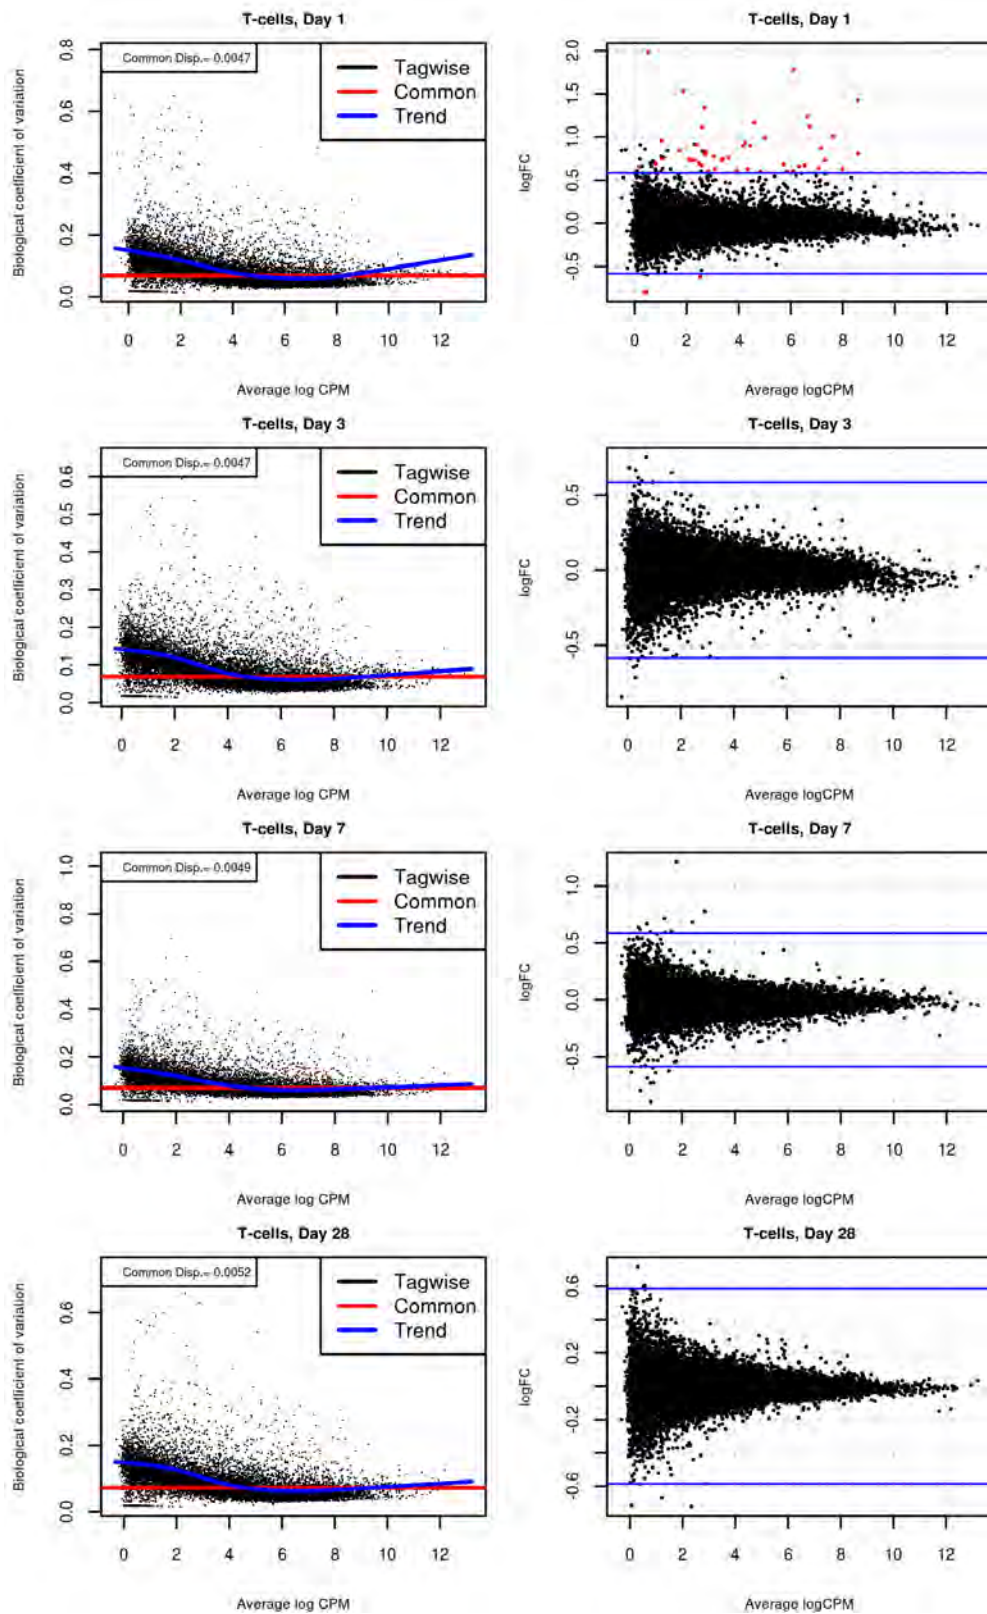

Figure A52: Model QC summary plots (RNA-Seq, T-cells).

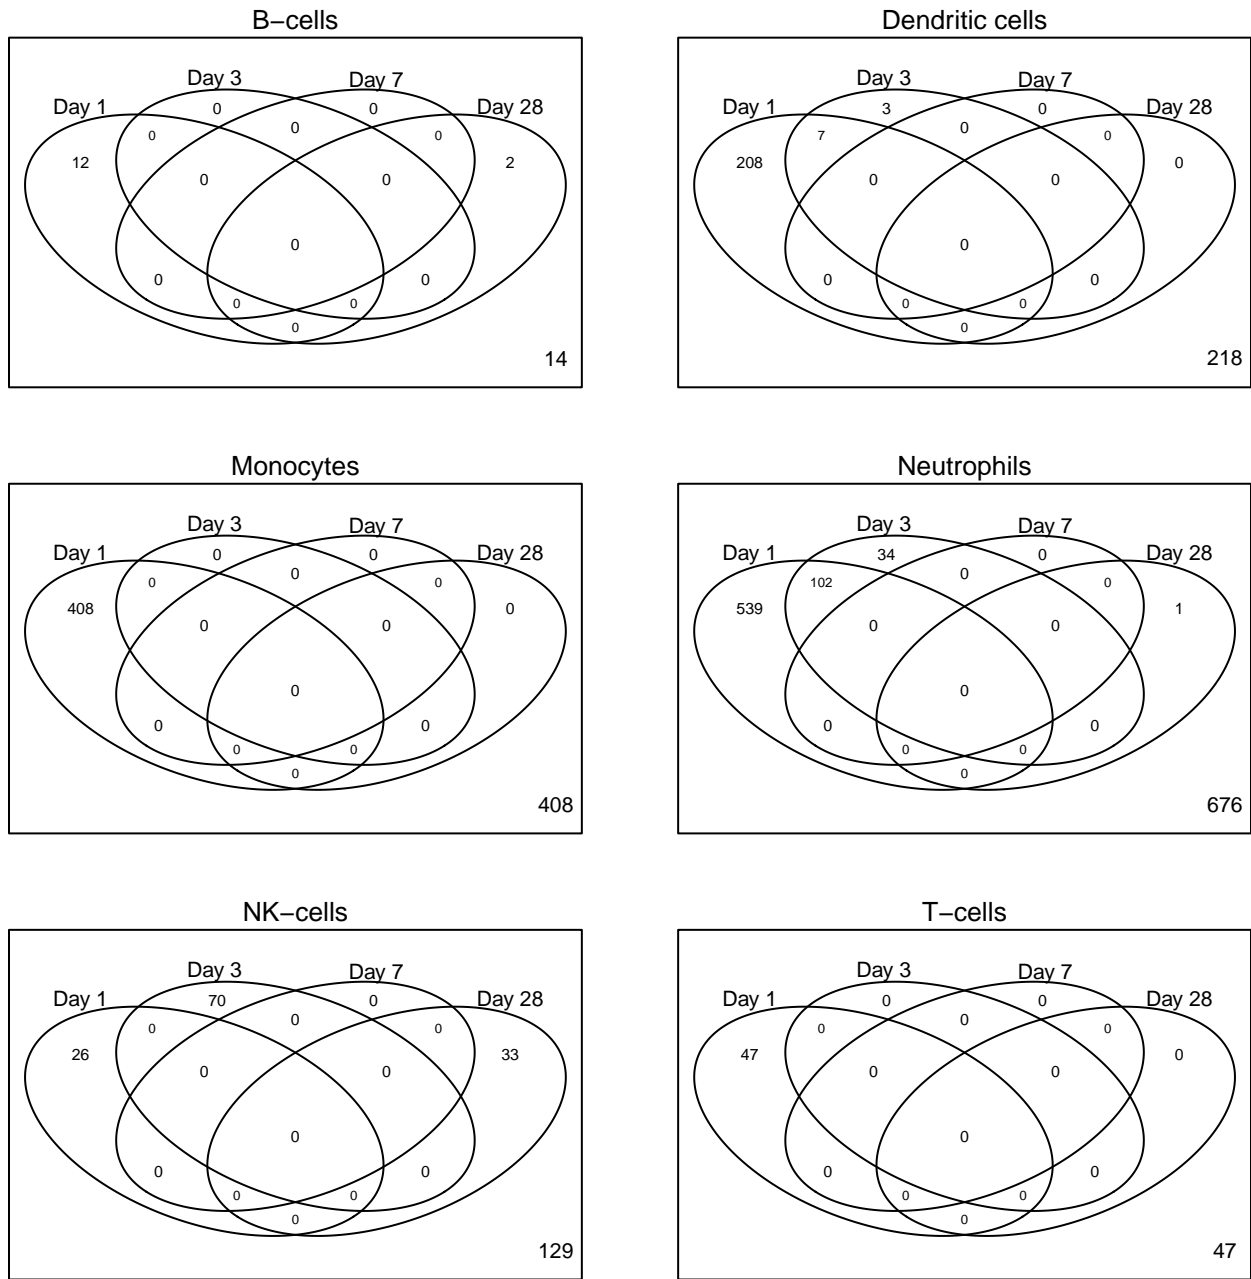

**Figure A53:** Venn diagrams of significant gene counts by day and cell type (RNA-Seq, before GC adjustment).



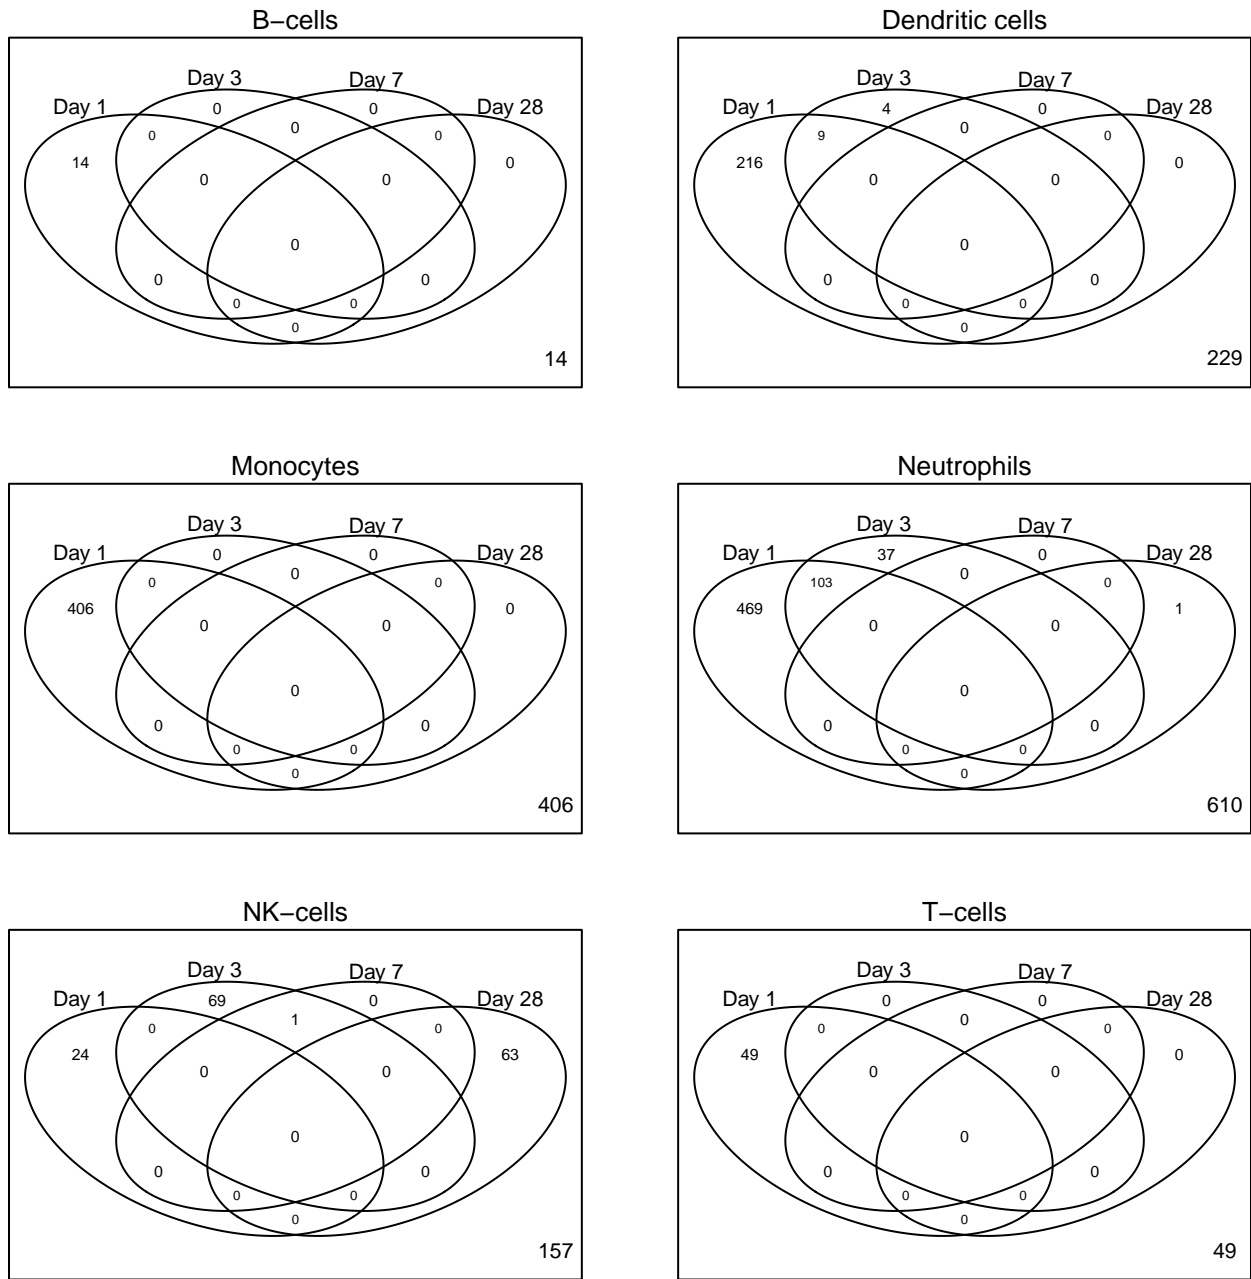

**Figure A54:** Venn diagrams of significant gene counts by day and cell type (RNA-Seq, after GC adjustment).

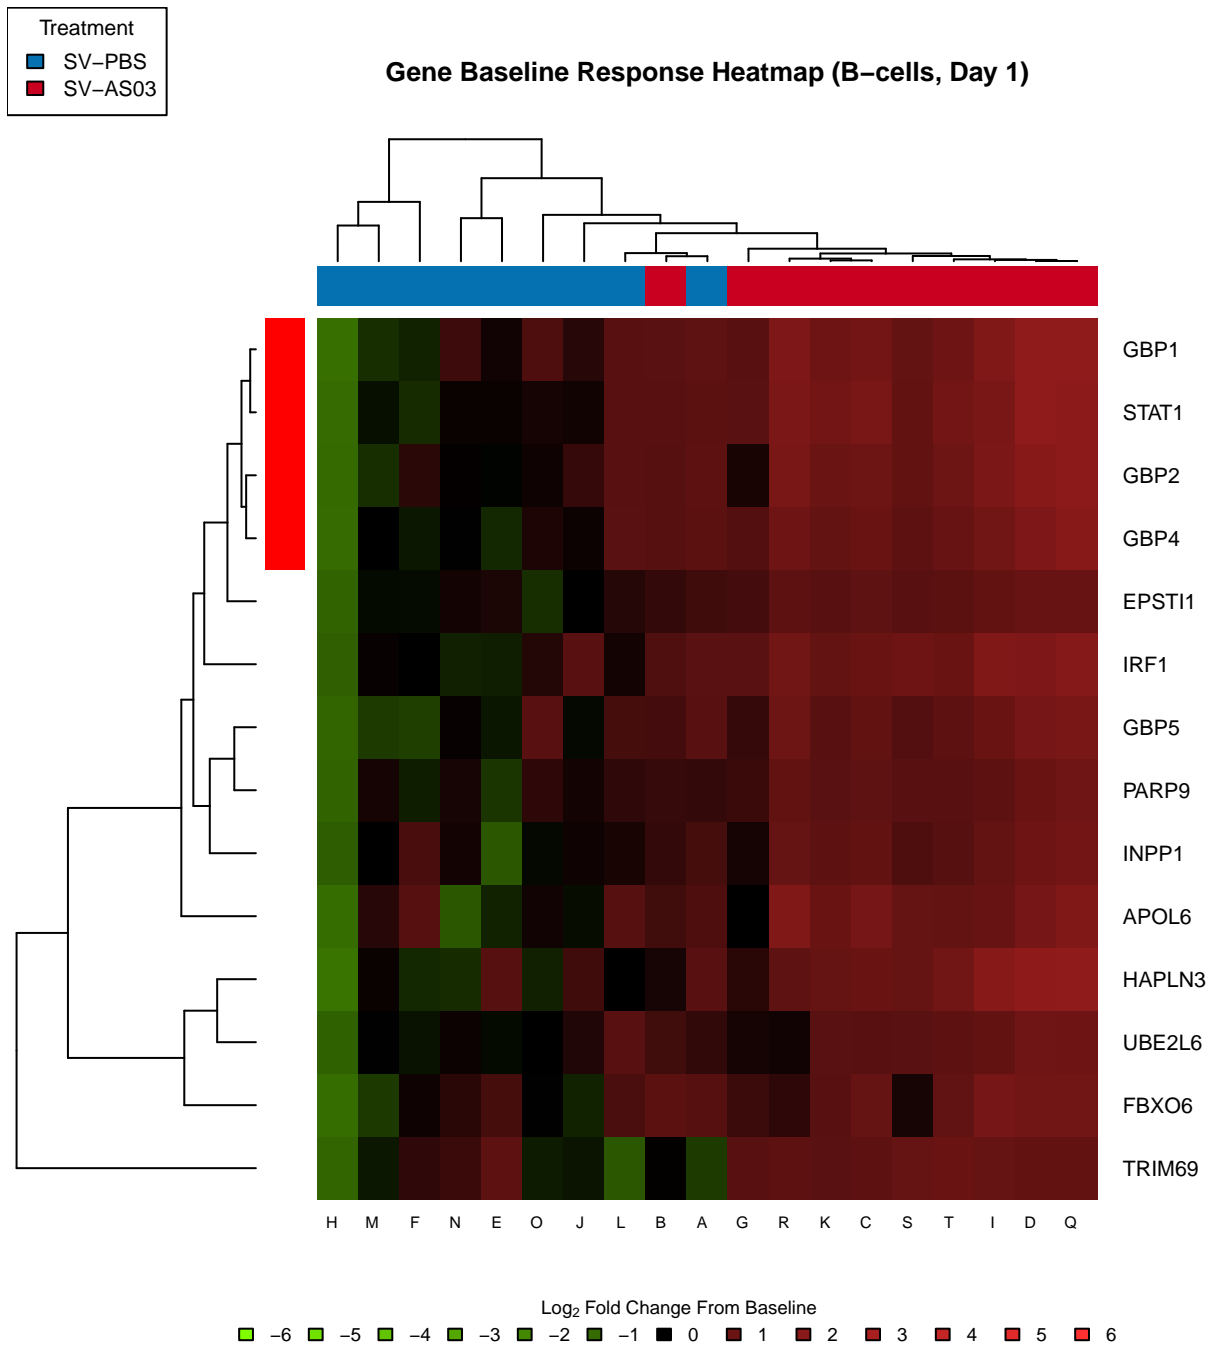

**Figure A55:** Heatmap of baseline log fold change (RNA-Seq, B-cells, Day 1). Colored in red: up regulated from baseline; colored in green: down regulated from baseline. Dendrograms were obtained using complete linkage clustering of uncentered pairwise Pearson correlation distances between log fold changes. Significant gene cluster membership is highlighted along the gene dendrogram on the left side; vaccine group membership is highlighted below the subject dendrogram.

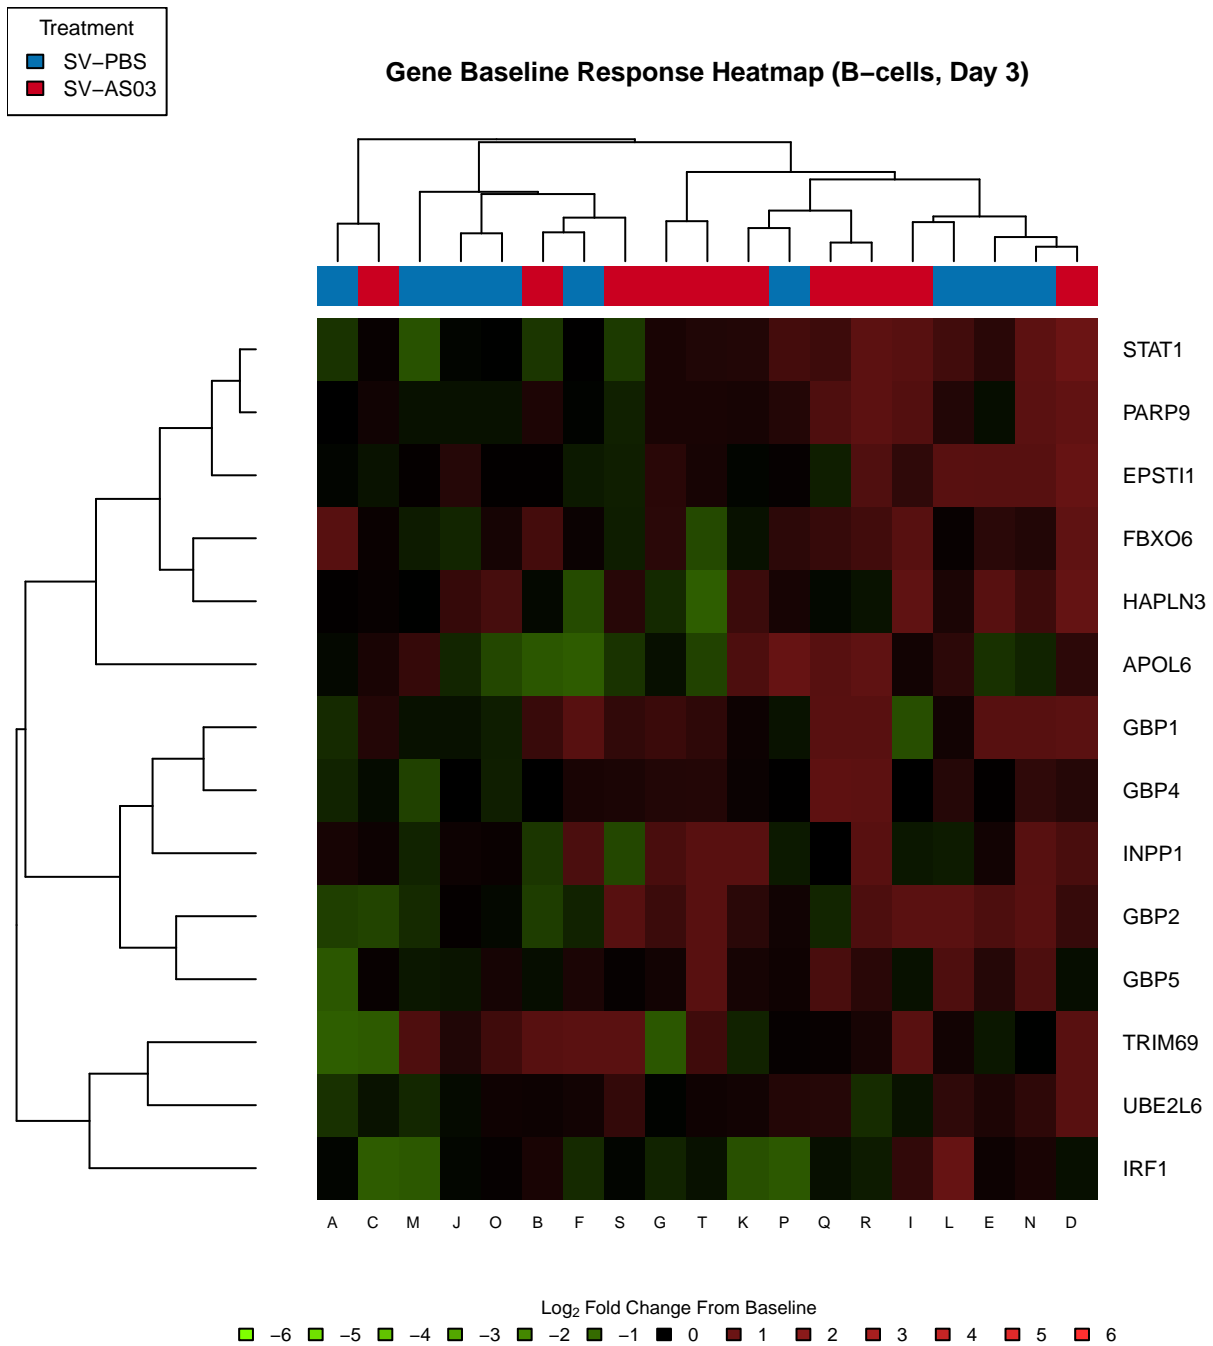

**Figure A56:** Heatmap of baseline log fold change (RNA-Seq, B-cells, Day 3). Colored in red: up regulated from baseline; colored in green: down regulated from baseline. Dendrograms were obtained using complete linkage clustering of uncentered pairwise Pearson correlation distances between log fold changes. Significant gene cluster membership is highlighted along the gene dendrogram on the left side; vaccine group membership is highlighted below the subject dendrogram.

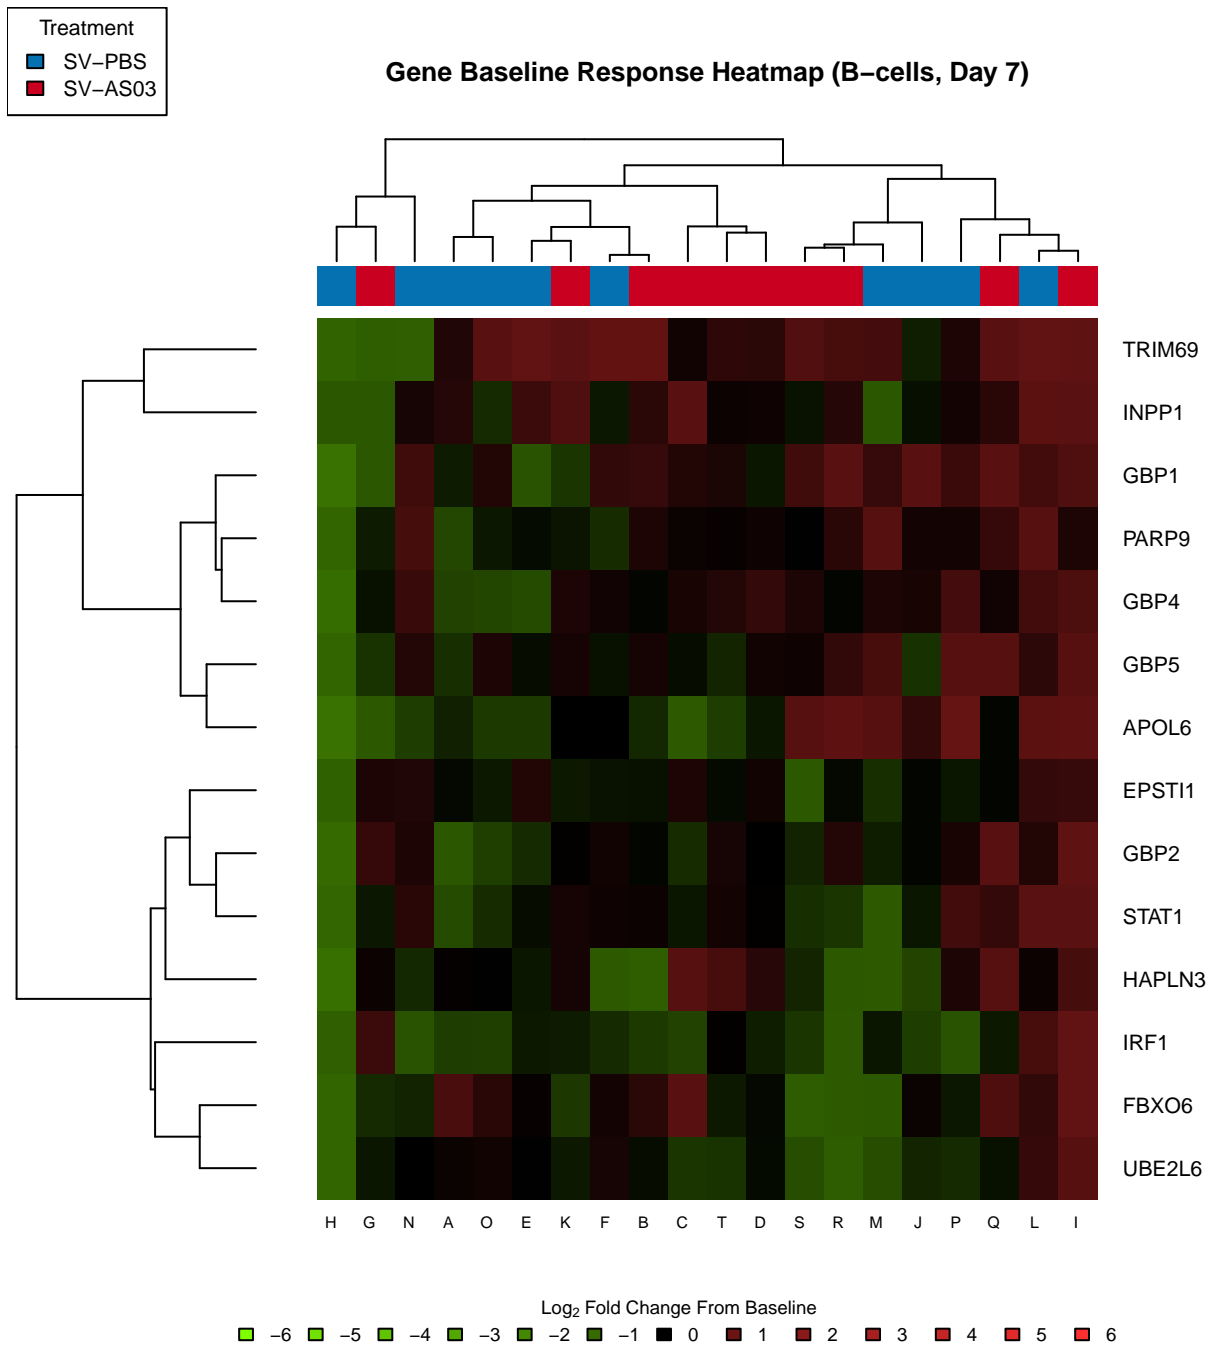

**Figure A57:** Heatmap of baseline log fold change (RNA-Seq, B-cells, Day 7). Colored in red: up regulated from baseline; colored in green: down regulated from baseline. Dendrograms were obtained using complete linkage clustering of uncentered pairwise Pearson correlation distances between log fold changes. Significant gene cluster membership is highlighted along the gene dendrogram on the left side; vaccine group membership is highlighted below the subject dendrogram.

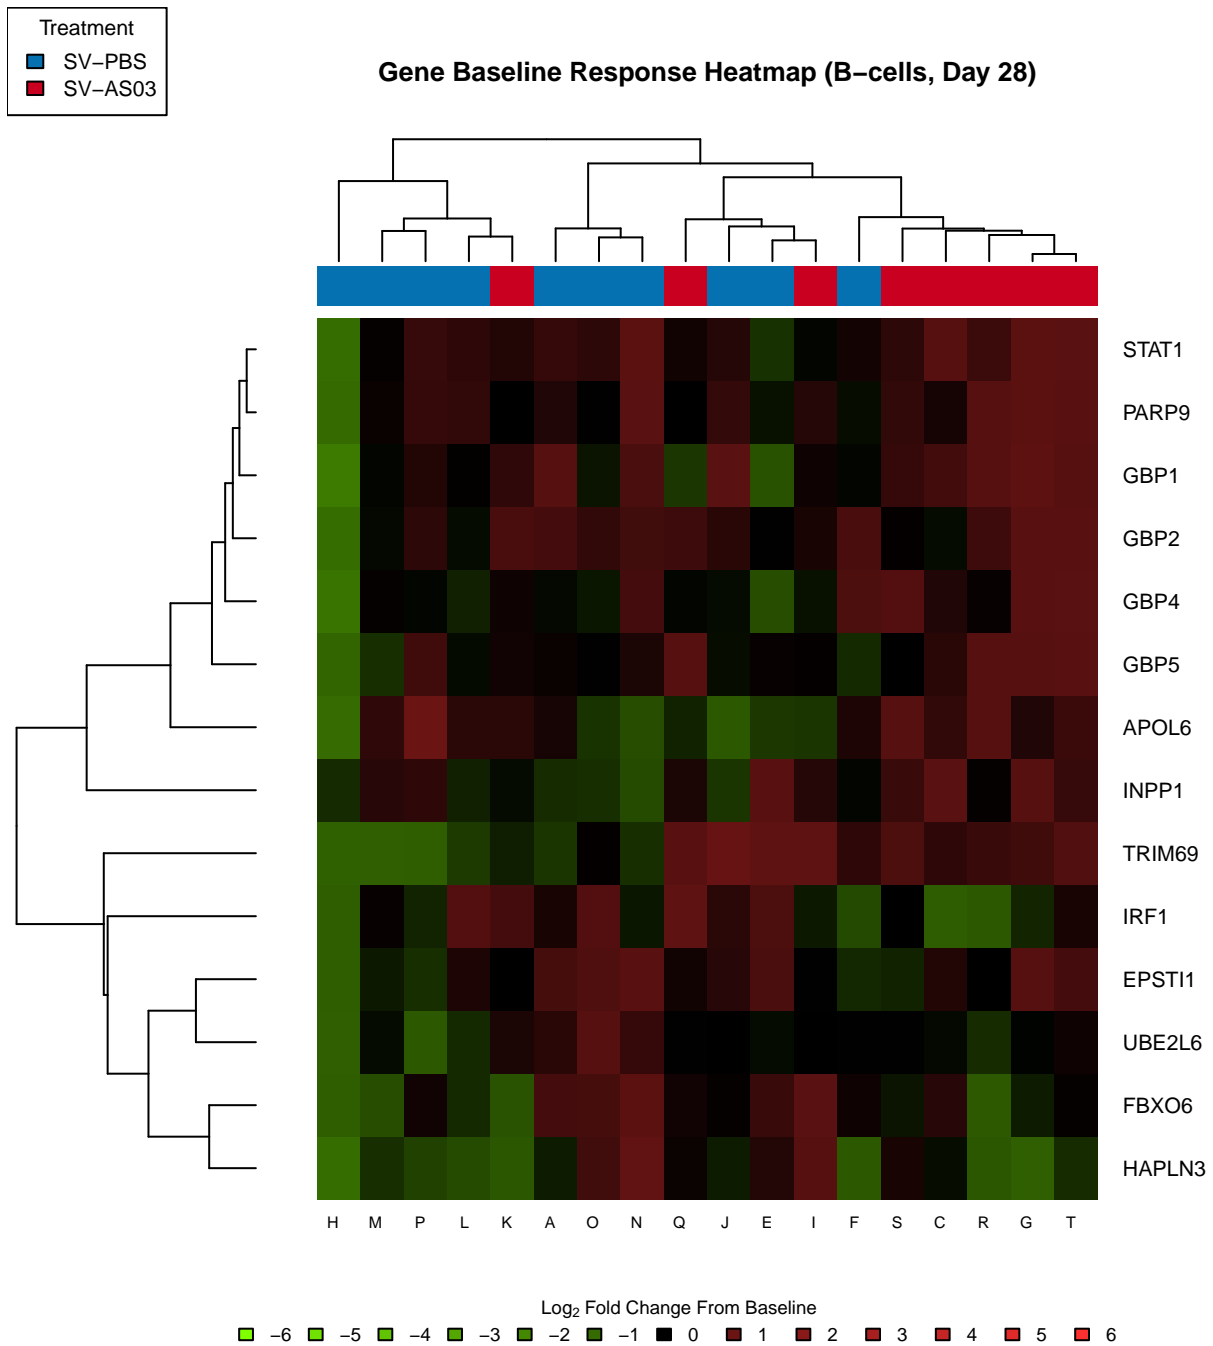

**Figure A58:** Heatmap of baseline log fold change (RNA-Seq, B-cells, Day 28). Colored in red: up regulated from baseline; colored in green: down regulated from baseline. Dendrograms were obtained using complete linkage clustering of uncentered pairwise Pearson correlation distances between log fold changes. Significant gene cluster membership is highlighted along the gene dendrogram on the left side; vaccine group membership is highlighted below the subject dendrogram.

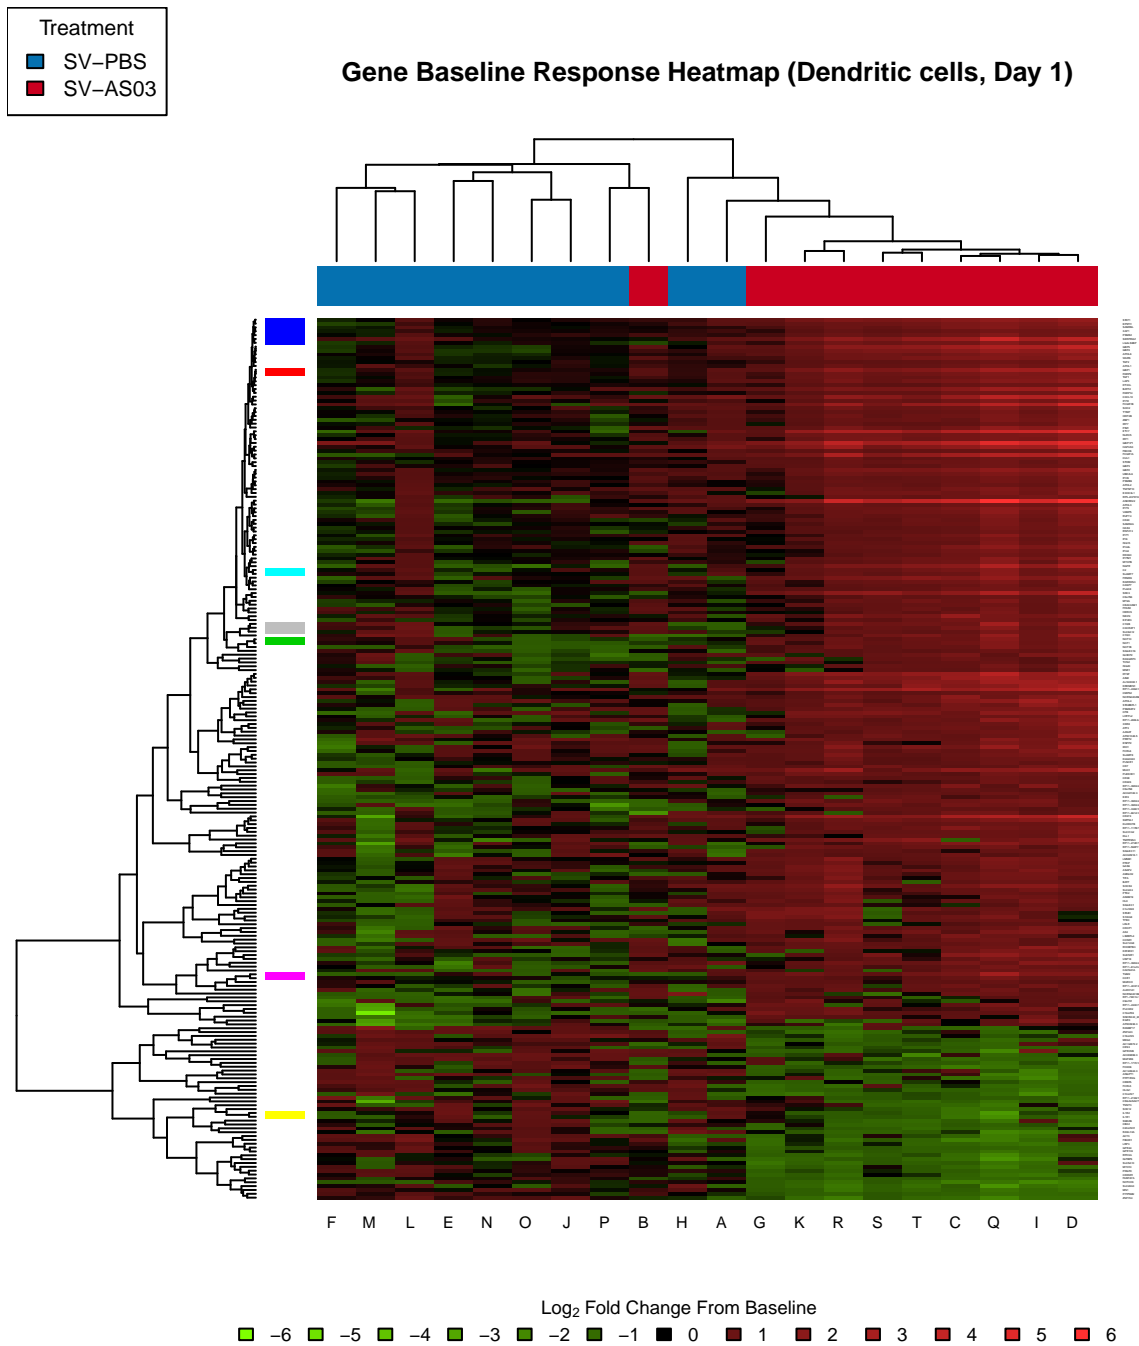

**Figure A59:** Heatmap of baseline log fold change (RNA-Seq, Dendritic cells, Day 1). Colored in red: up regulated from baseline; colored in green: down regulated from baseline. Dendrograms were obtained using complete linkage clustering of uncentered pairwise Pearson correlation distances between log fold changes. Significant gene cluster membership is highlighted along the gene dendrogram on the left side; vaccine group membership is highlighted below the subject dendrogram.

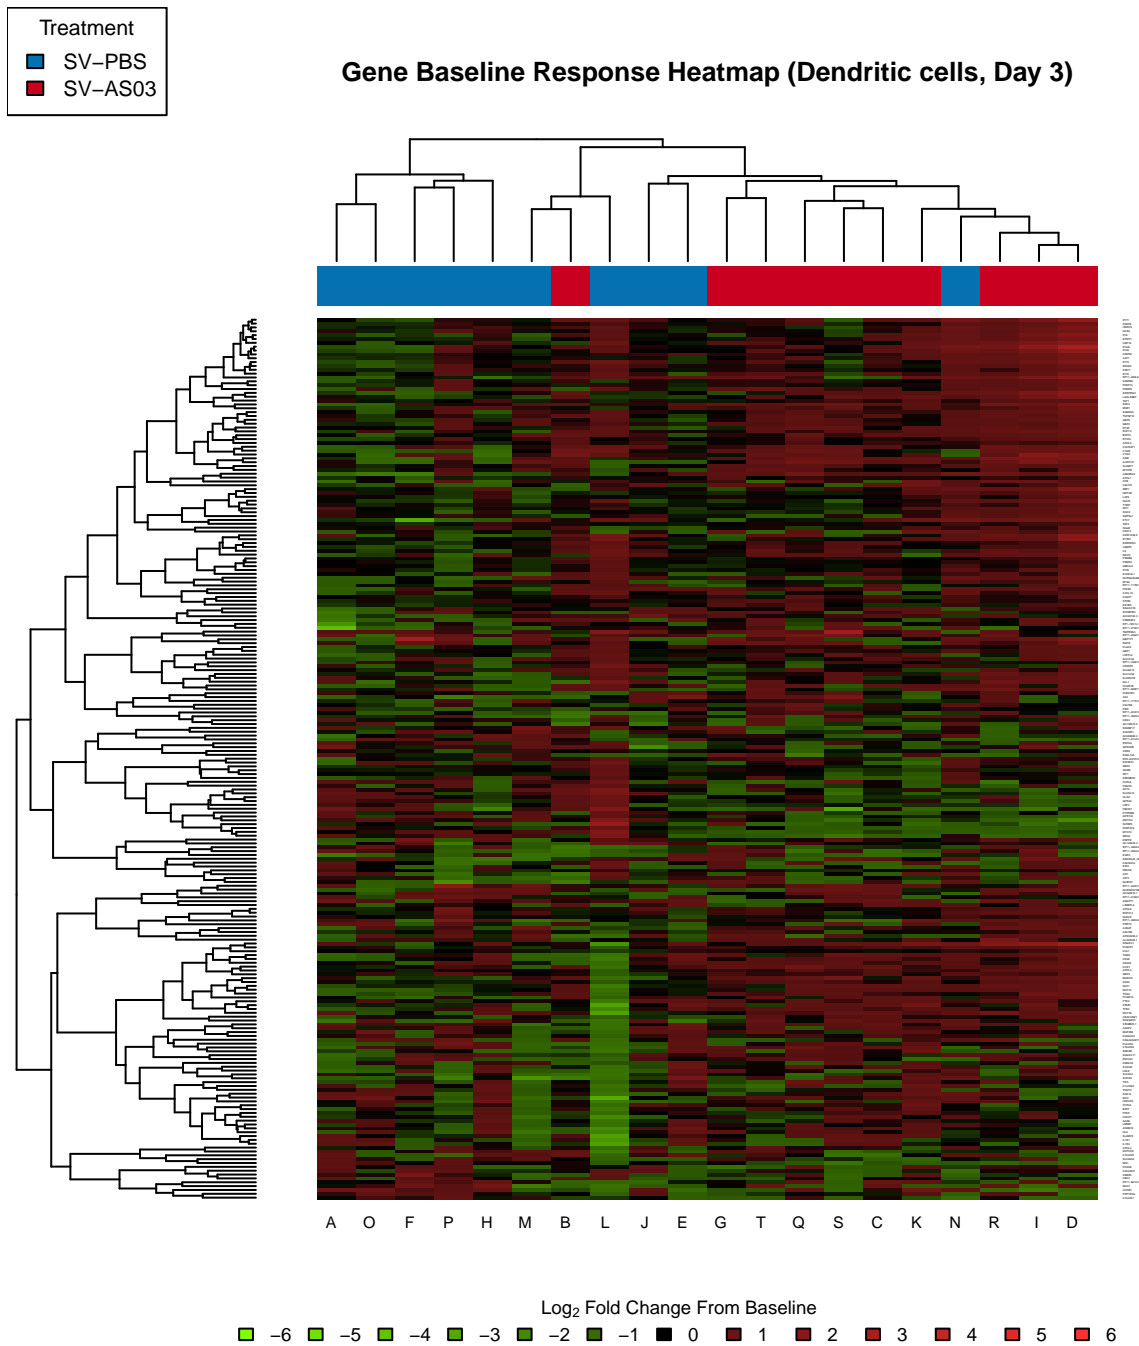

**Figure A60:** Heatmap of baseline log fold change (RNA-Seq, Dendritic cells, Day 3). Colored in red: up regulated from baseline; colored in green: down regulated from baseline. Dendrograms were obtained using complete linkage clustering of uncentered pairwise Pearson correlation distances between log fold changes. Significant gene cluster membership is highlighted along the gene dendrogram on the left side; vaccine group membership is highlighted below the subject dendrogram.

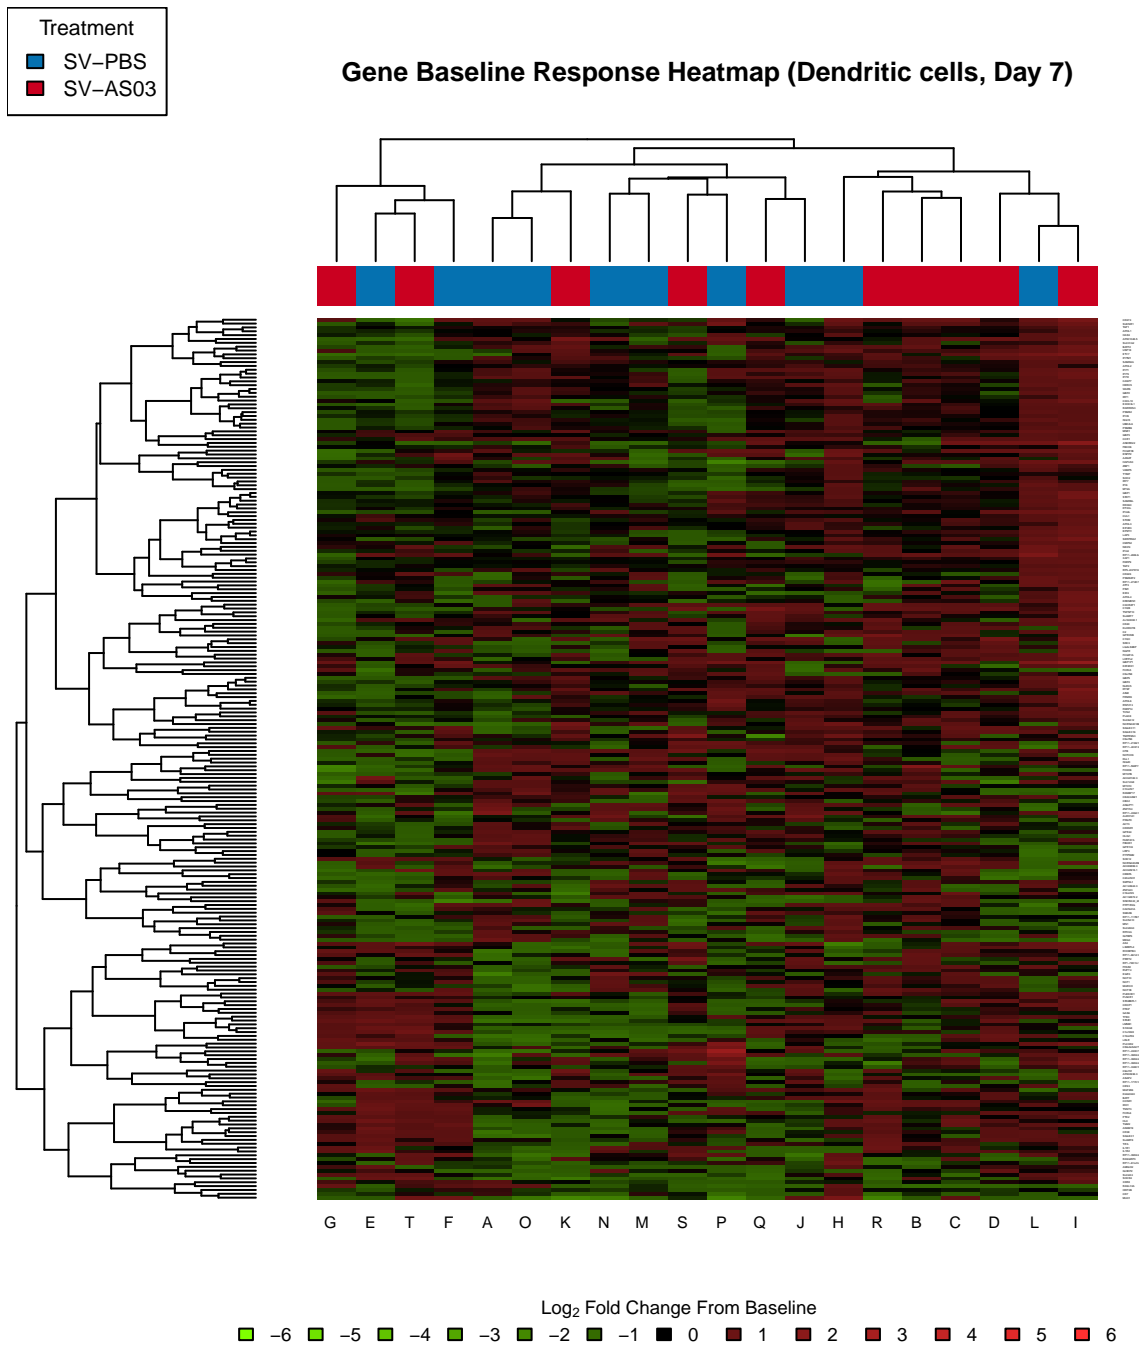

**Figure A61:** Heatmap of baseline log fold change (RNA-Seq, Dendritic cells, Day 7). Colored in red: up regulated from baseline; colored in green: down regulated from baseline. Dendrograms were obtained using complete linkage clustering of uncentered pairwise Pearson correlation distances between log fold changes. Significant gene cluster membership is highlighted along the gene dendrogram on the left side; vaccine group membership is highlighted below the subject dendrogram.



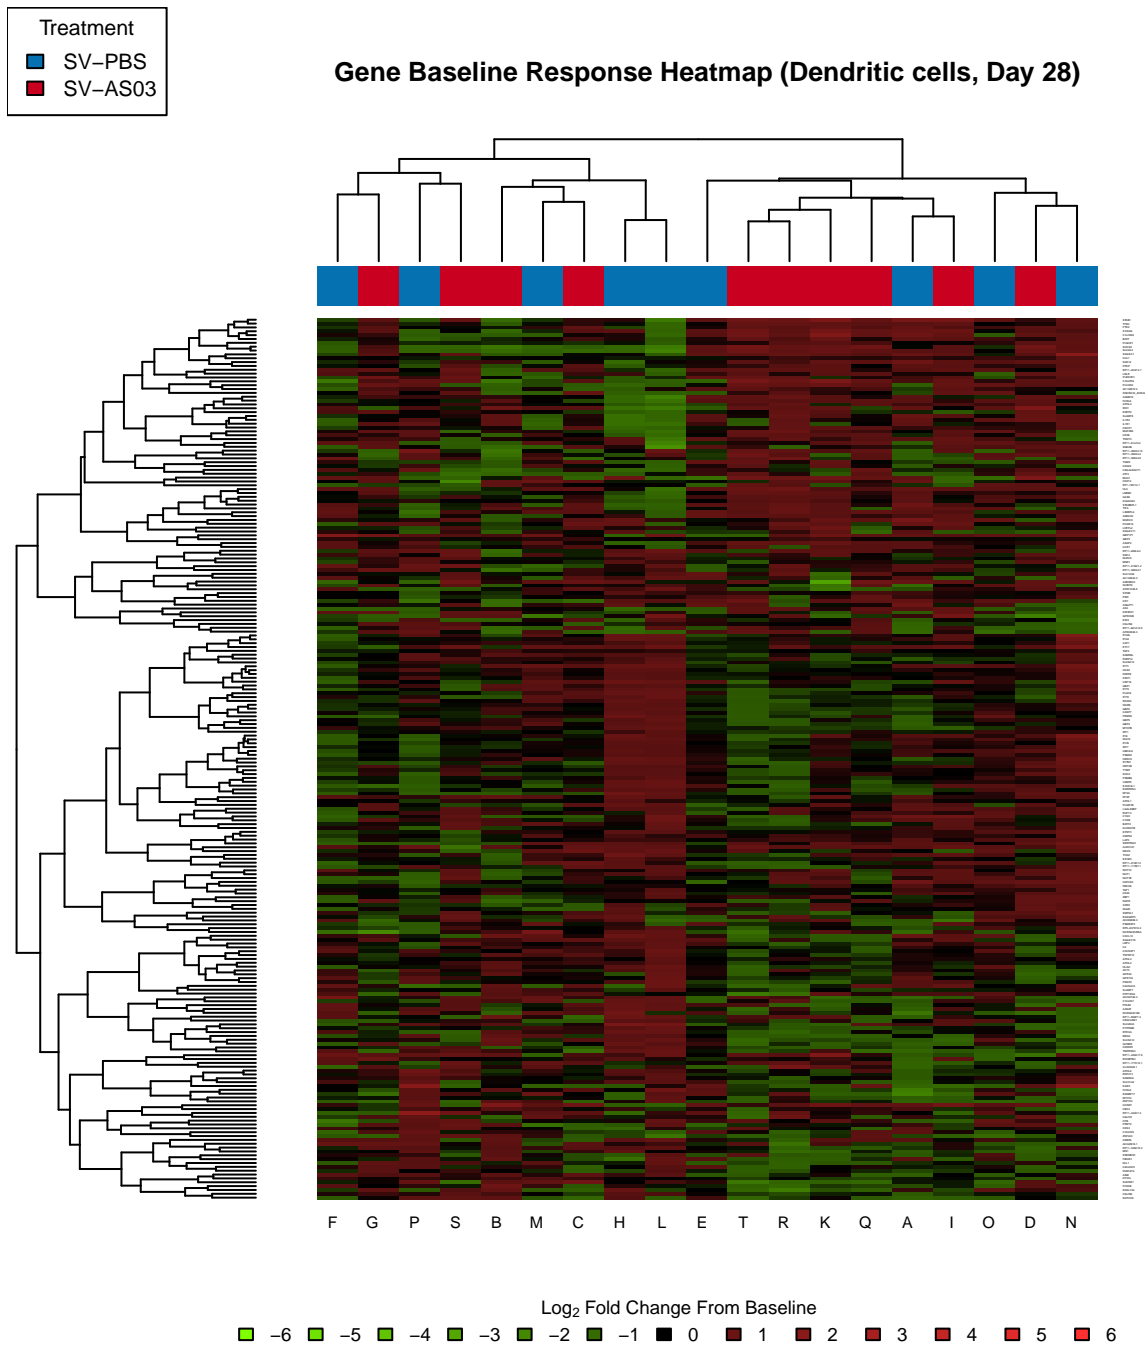

**Figure A62:** Heatmap of baseline log fold change (RNA-Seq, Dendritic cells, Day 28). Colored in red: up regulated from baseline; colored in green: down regulated from baseline. Dendrograms were obtained using complete linkage clustering of uncentered pairwise Pearson correlation distances between log fold changes. Significant gene cluster membership is highlighted along the gene dendrogram on the left side; vaccine group membership is highlighted below the subject dendrogram.

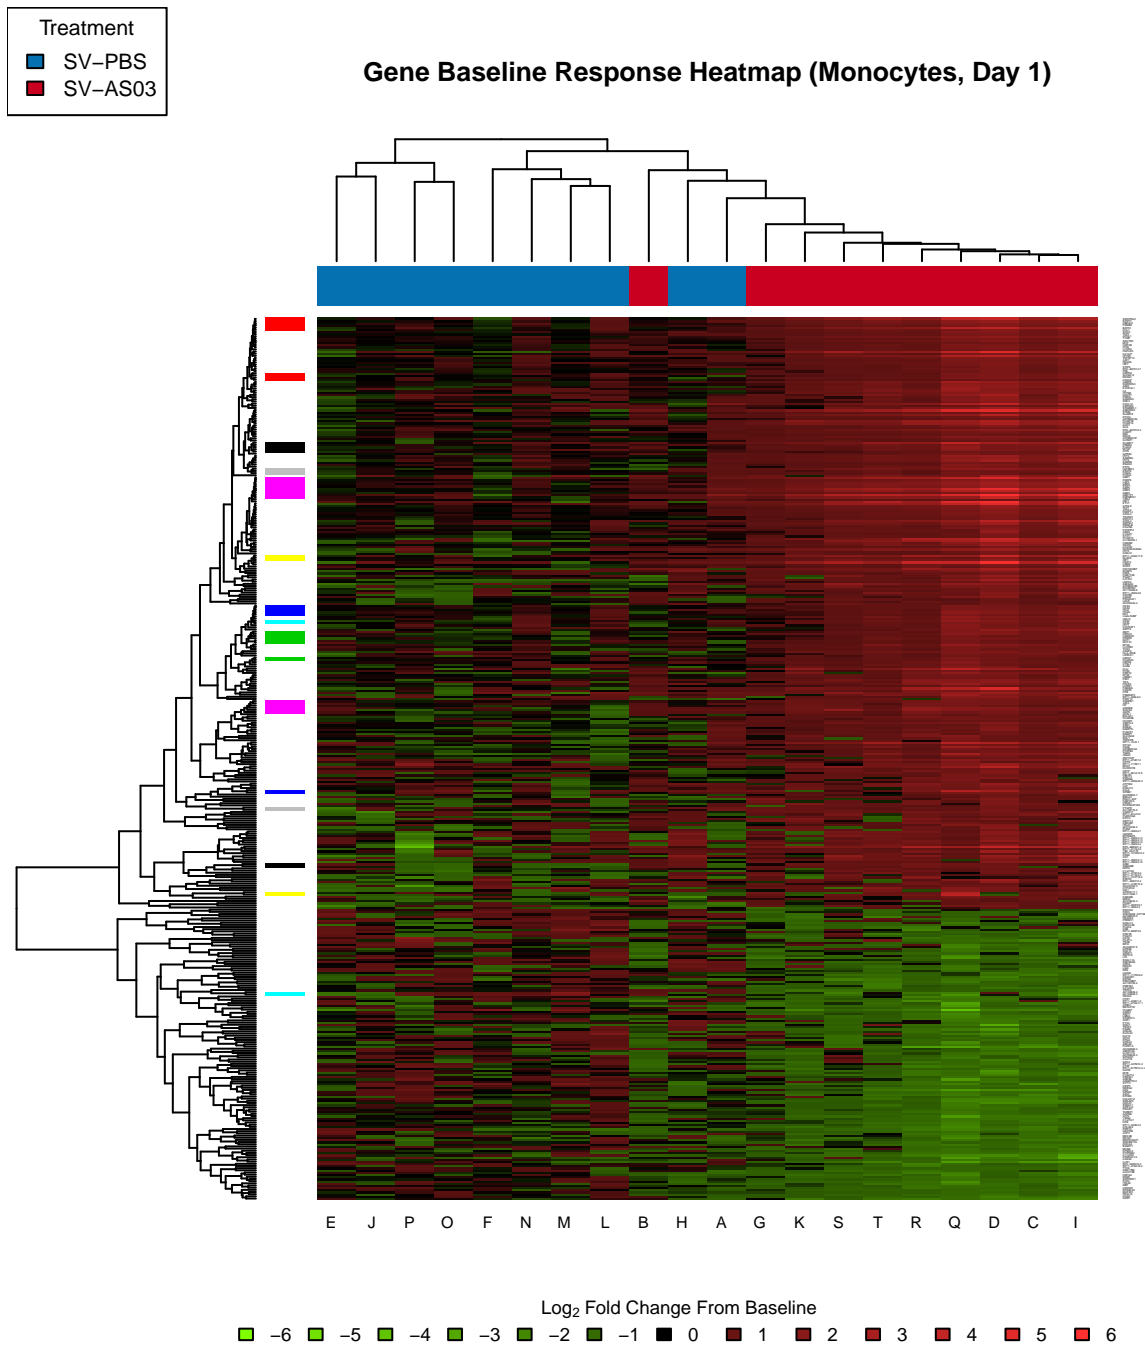

**Figure A63:** Heatmap of baseline log fold change (RNA-Seq, Monocytes, Day 1). Colored in red: up regulated from baseline; colored in green: down regulated from baseline. Dendrograms were obtained using complete linkage clustering of uncentered pairwise Pearson correlation distances between log fold changes. Significant gene cluster membership is highlighted along the gene dendrogram on the left side; vaccine group membership is highlighted below the subject dendrogram.

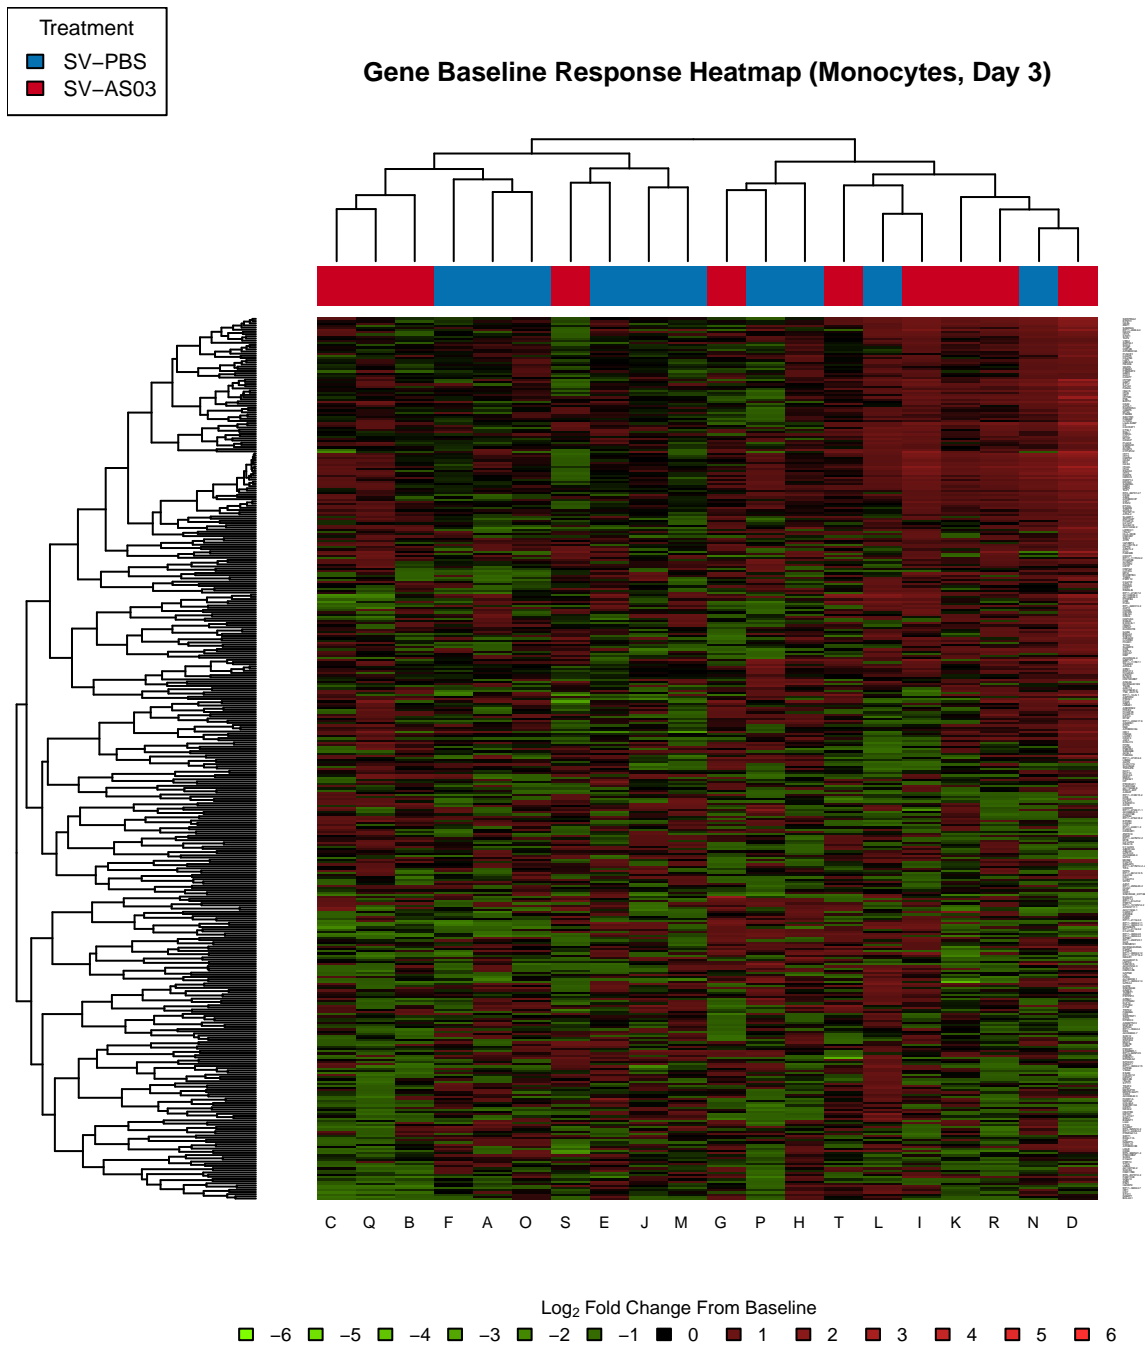

**Figure A64:** Heatmap of baseline log fold change (RNA-Seq, Monocytes, Day 3). Colored in red: up regulated from baseline; colored in green: down regulated from baseline. Dendrograms were obtained using complete linkage clustering of uncentered pairwise Pearson correlation distances between log fold changes. Significant gene cluster membership is highlighted along the gene dendrogram on the left side; vaccine group membership is highlighted below the subject dendrogram.

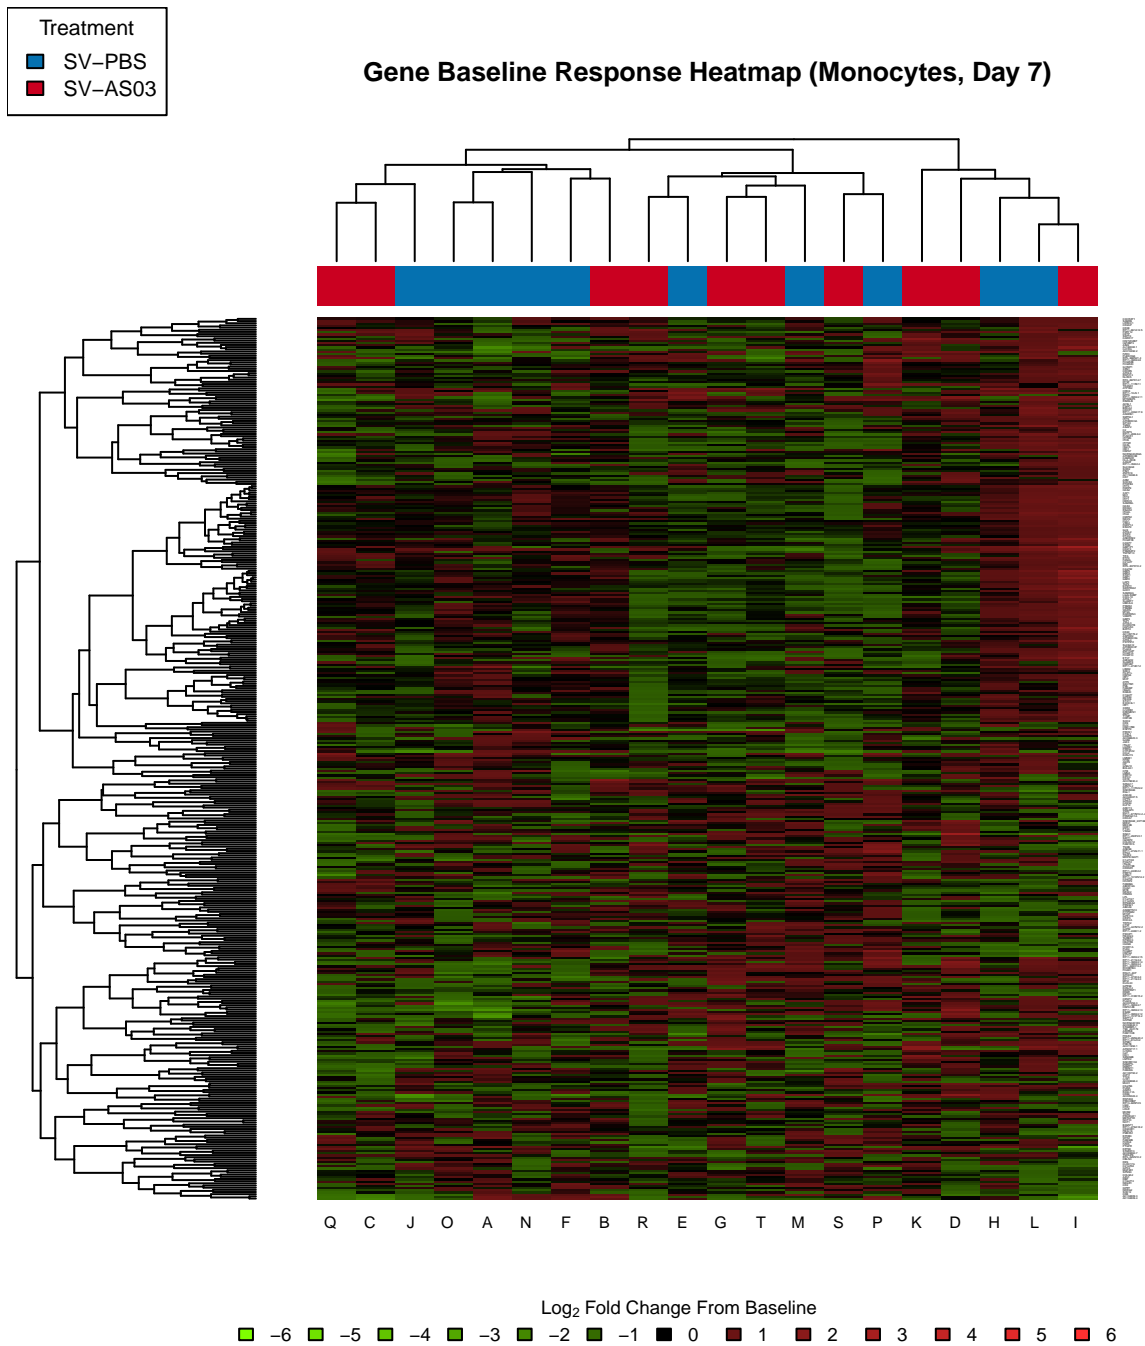

**Figure A65:** Heatmap of baseline log fold change (RNA-Seq, Monocytes, Day 7). Colored in red: up regulated from baseline; colored in green: down regulated from baseline. Dendrograms were obtained using complete linkage clustering of uncentered pairwise Pearson correlation distances between log fold changes. Significant gene cluster membership is highlighted along the gene dendrogram on the left side; vaccine group membership is highlighted below the subject dendrogram.

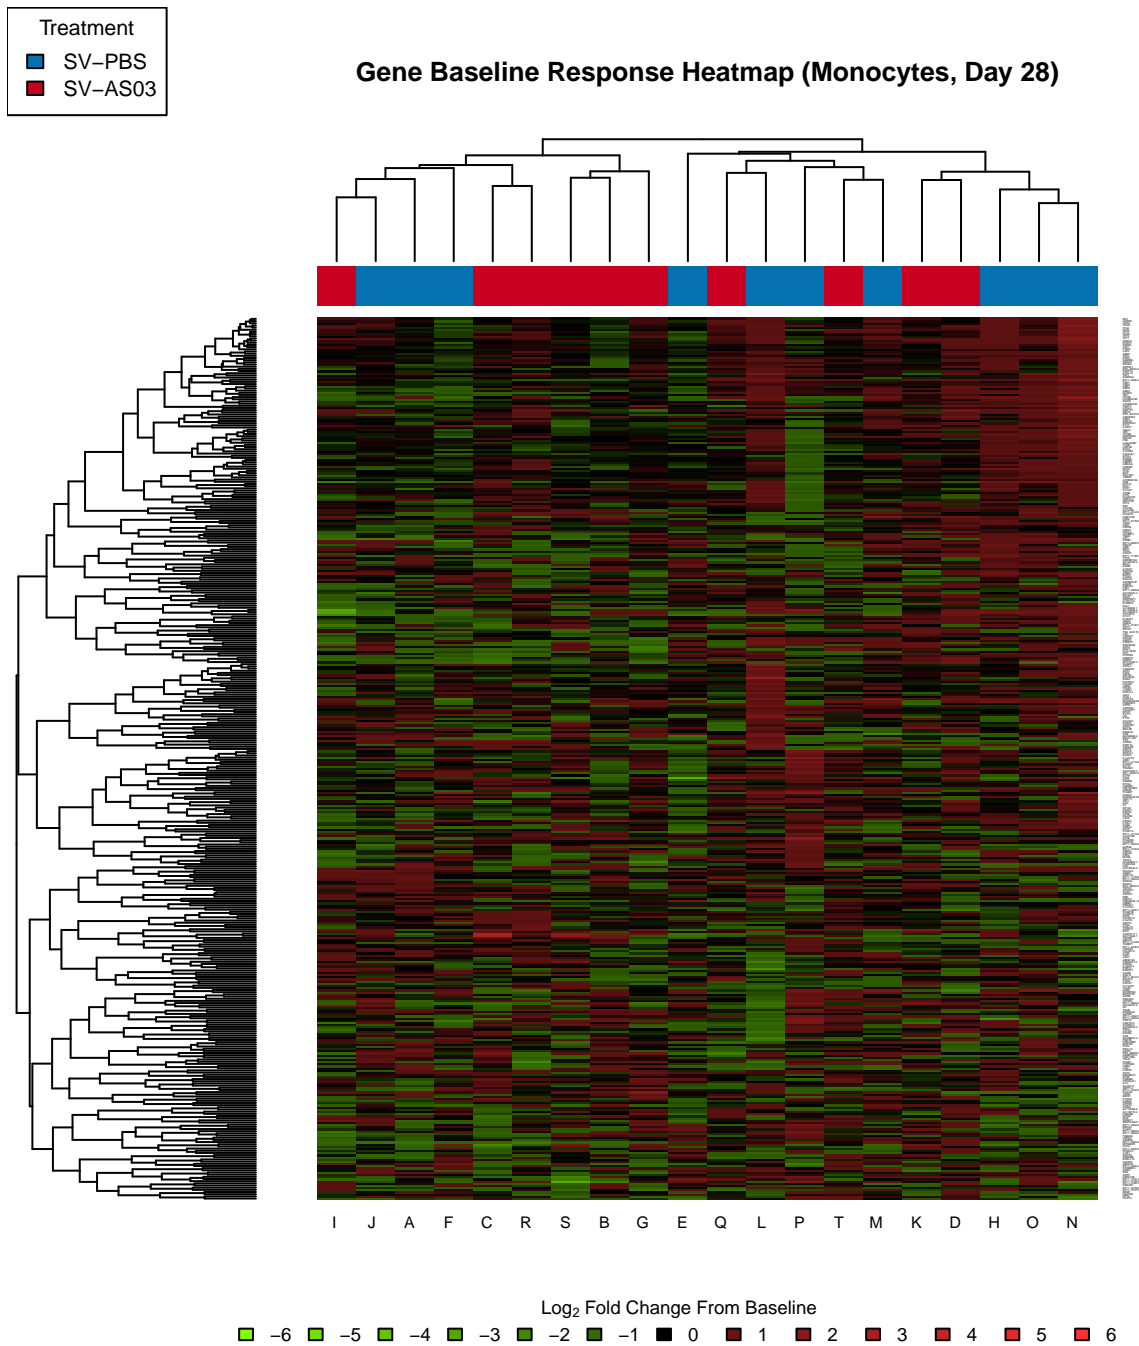

**Figure A66:** Heatmap of baseline log fold change (RNA-Seq, Monocytes, Day 28). Colored in red: up regulated from baseline; colored in green: down regulated from baseline. Dendrograms were obtained using complete linkage clustering of uncentered pairwise Pearson correlation distances between log fold changes. Significant gene cluster membership is highlighted along the gene dendrogram on the left side; vaccine group membership is highlighted below the subject dendrogram.

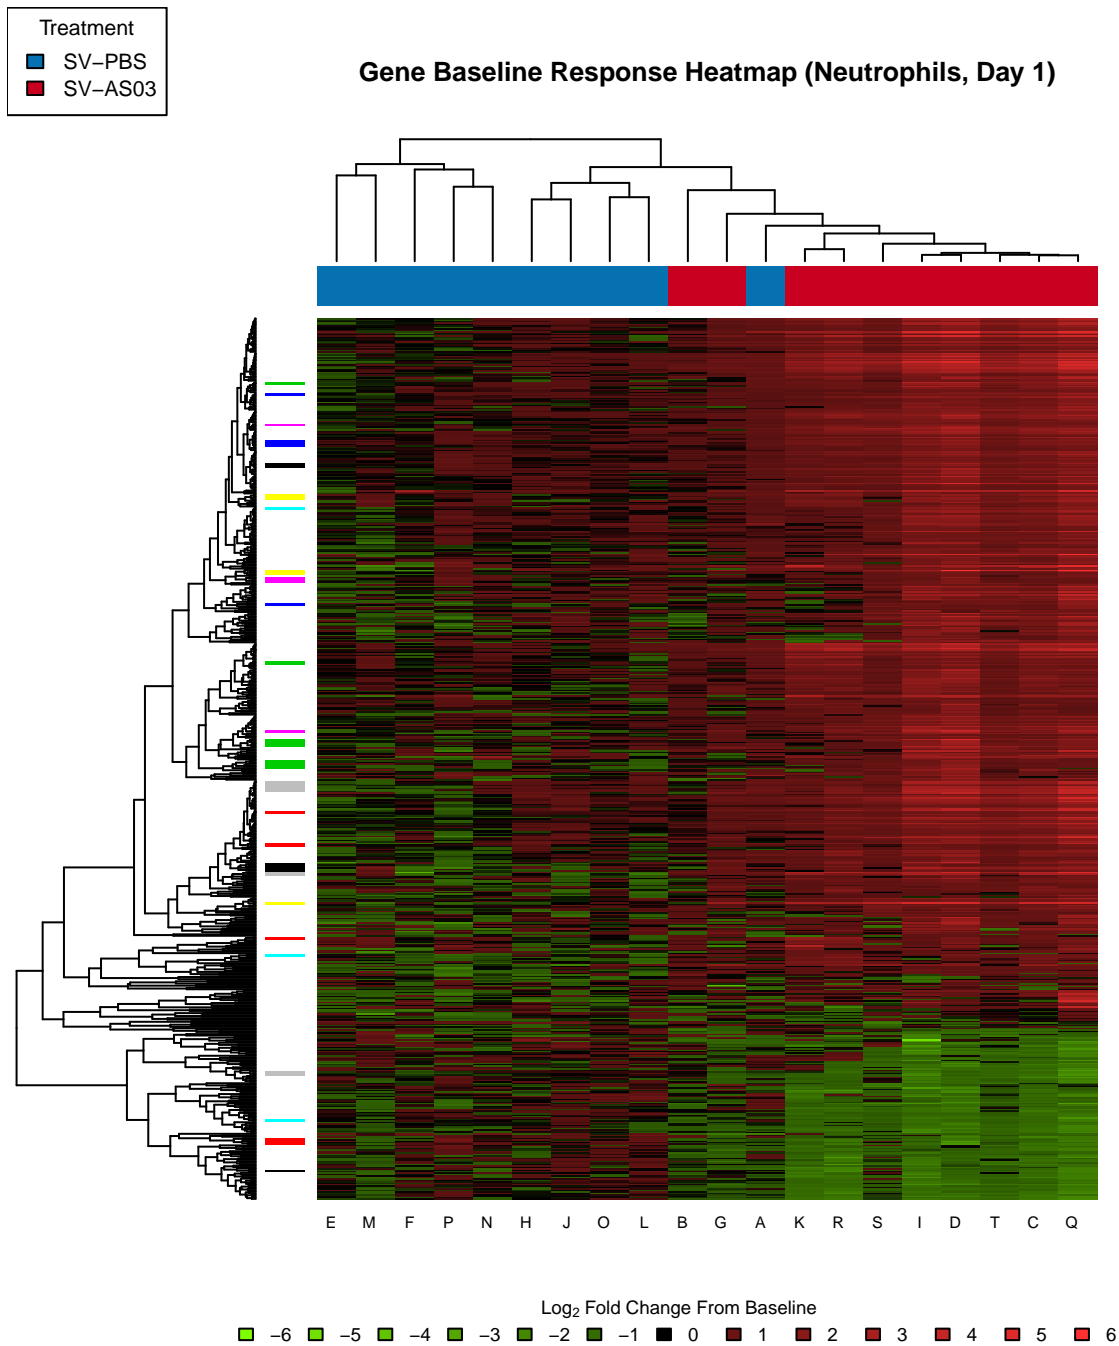

**Figure A67:** Heatmap of baseline log fold change (RNA-Seq, Neutrophils, Day 1). Colored in red: up regulated from baseline; colored in green: down regulated from baseline. Dendrograms were obtained using complete linkage clustering of uncentered pairwise Pearson correlation distances between log fold changes. Significant gene cluster membership is highlighted along the gene dendrogram on the left side; vaccine group membership is highlighted below the subject dendrogram.

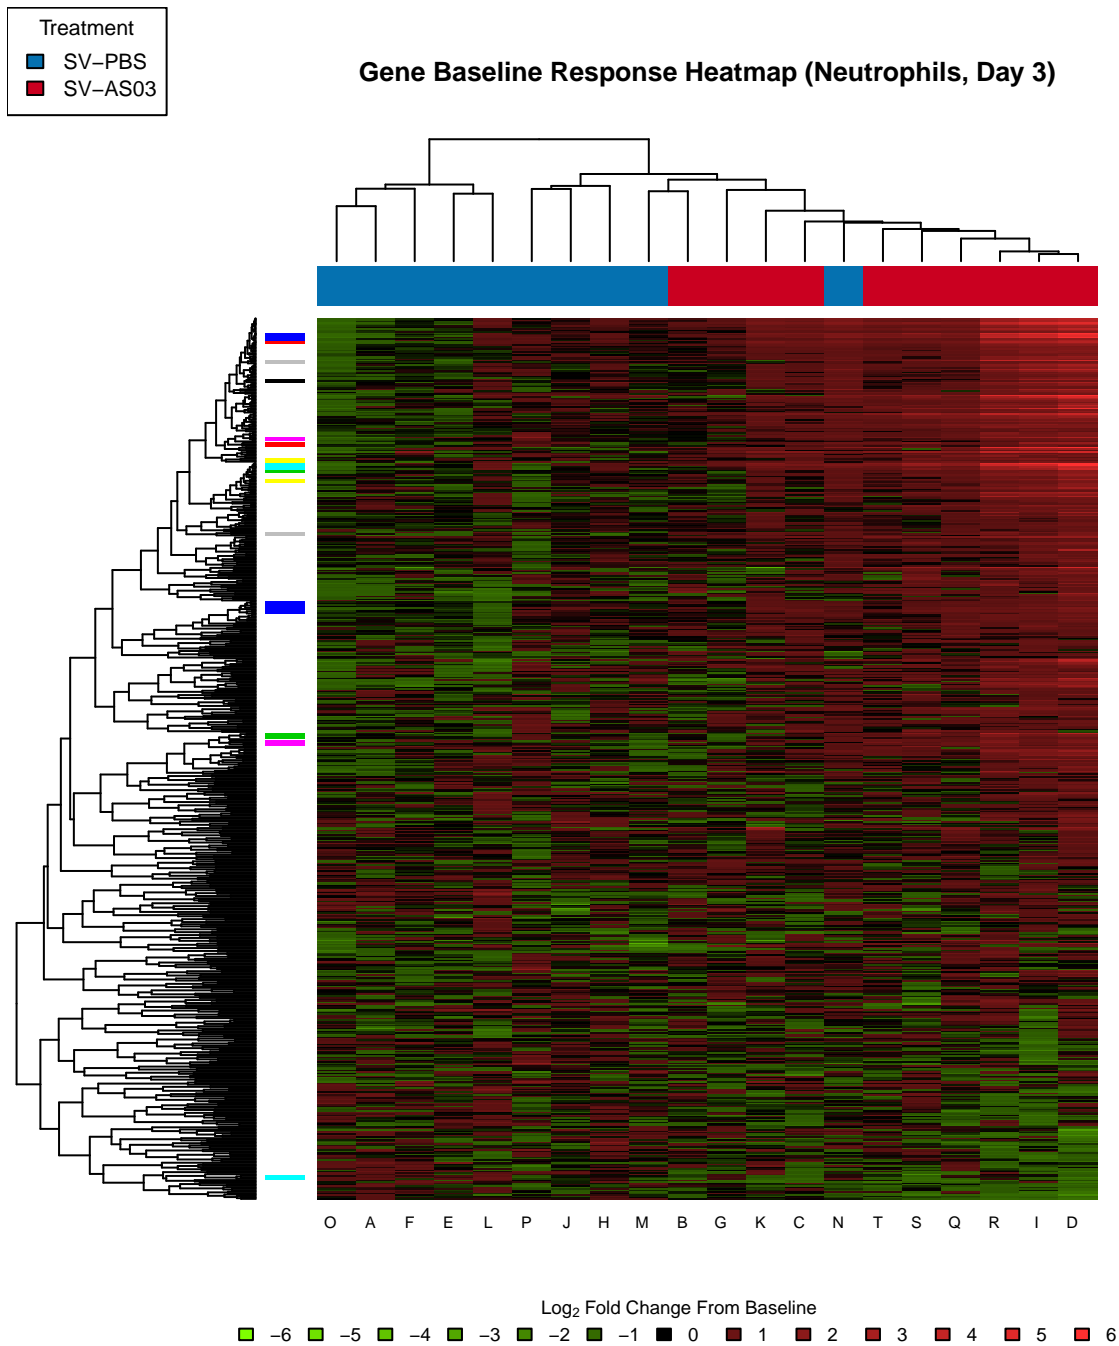

**Figure A68:** Heatmap of baseline log fold change (RNA-Seq, Neutrophils, Day 3). Colored in red: up regulated from baseline; colored in green: down regulated from baseline. Dendrograms were obtained using complete linkage clustering of uncentered pairwise Pearson correlation distances between log fold changes. Significant gene cluster membership is highlighted along the gene dendrogram on the left side; vaccine group membership is highlighted below the subject dendrogram.

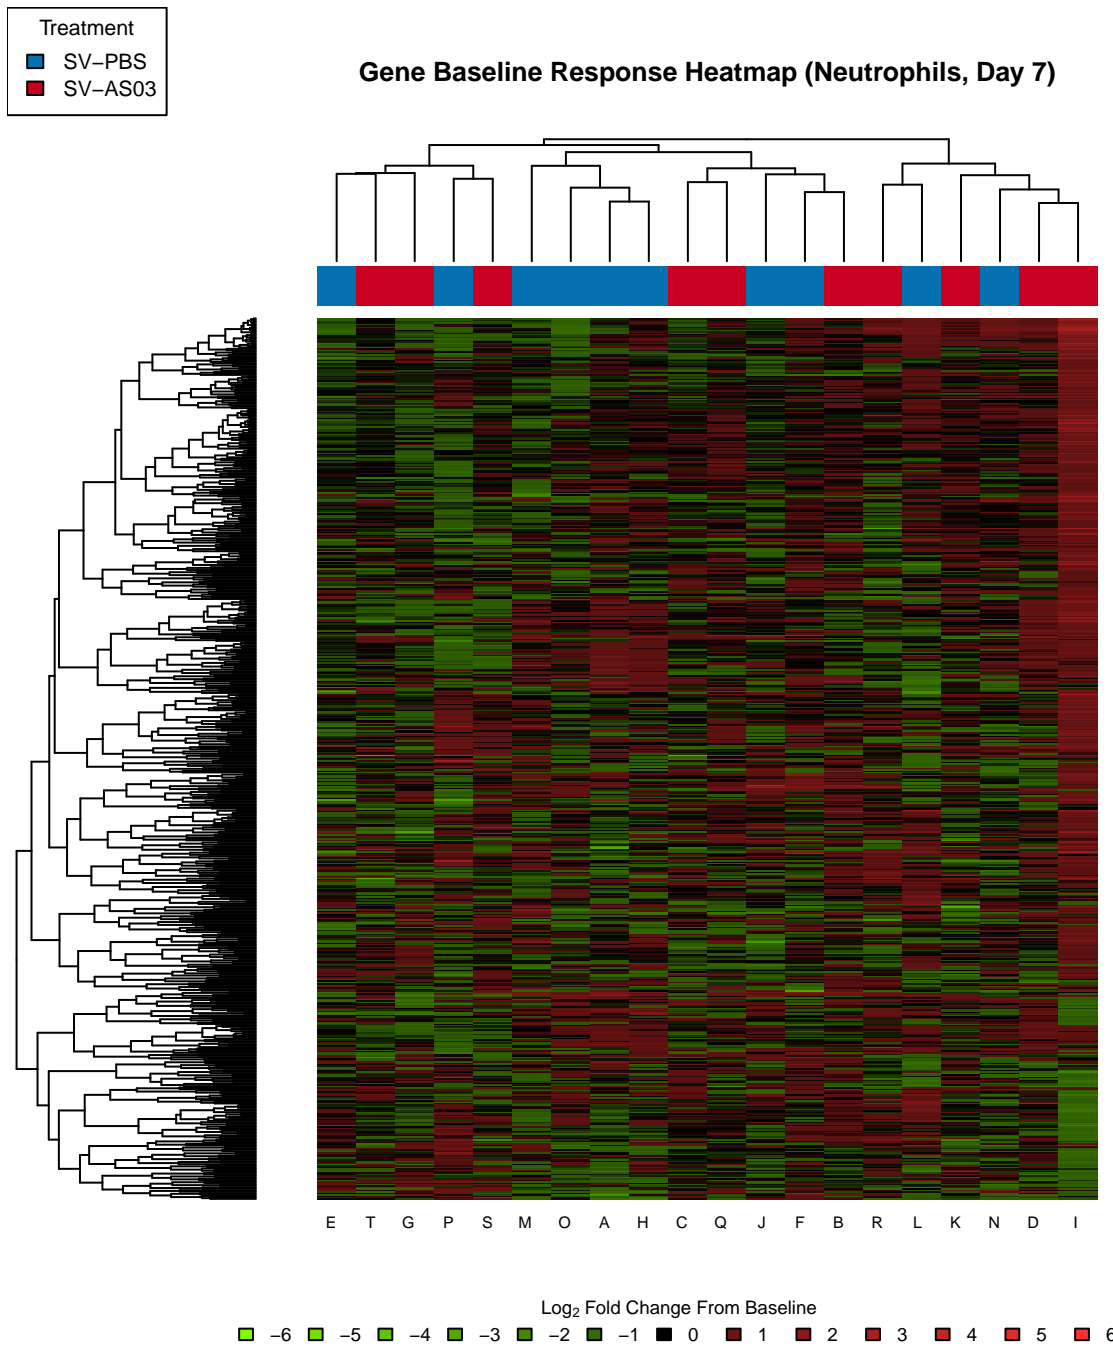

**Figure A69:** Heatmap of baseline log fold change (RNA-Seq, Neutrophils, Day 7). Colored in red: up regulated from baseline; colored in green: down regulated from baseline. Dendrograms were obtained using complete linkage clustering of uncentered pairwise Pearson correlation distances between log fold changes. Significant gene cluster membership is highlighted along the gene dendrogram on the left side; vaccine group membership is highlighted below the subject dendrogram.



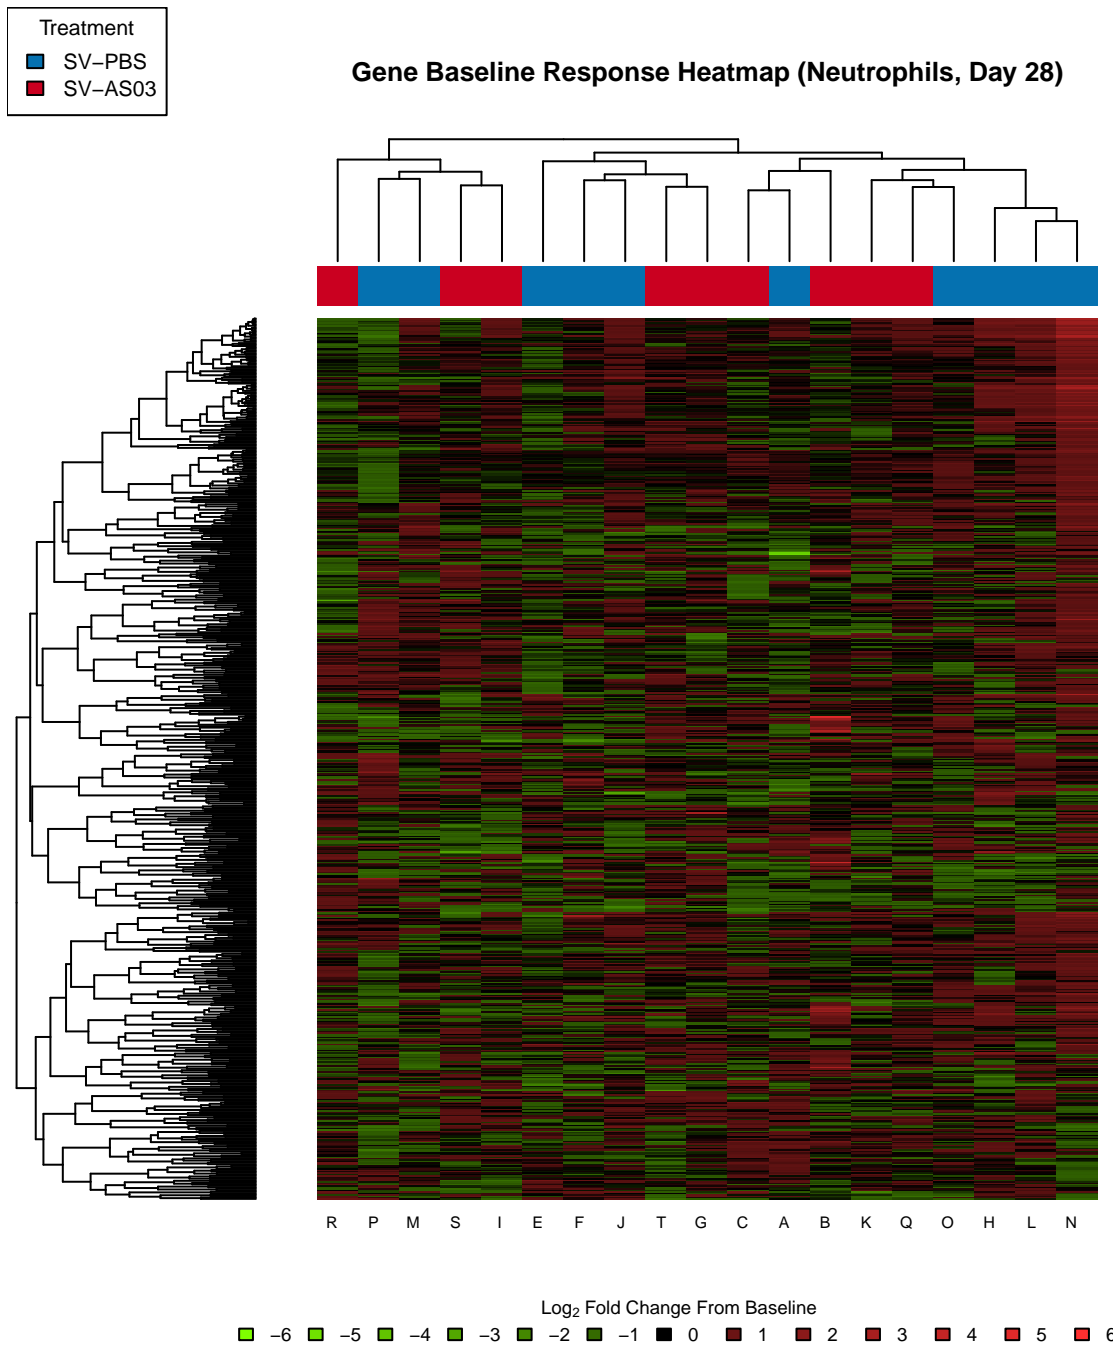

**Figure A70:** Heatmap of baseline log fold change (RNA-Seq, Neutrophils, Day 28). Colored in red: up regulated from baseline; colored in green: down regulated from baseline. Dendrograms were obtained using complete linkage clustering of uncentered pairwise Pearson correlation distances between log fold changes. Significant gene cluster membership is highlighted along the gene dendrogram on the left side; vaccine group membership is highlighted below the subject dendrogram.



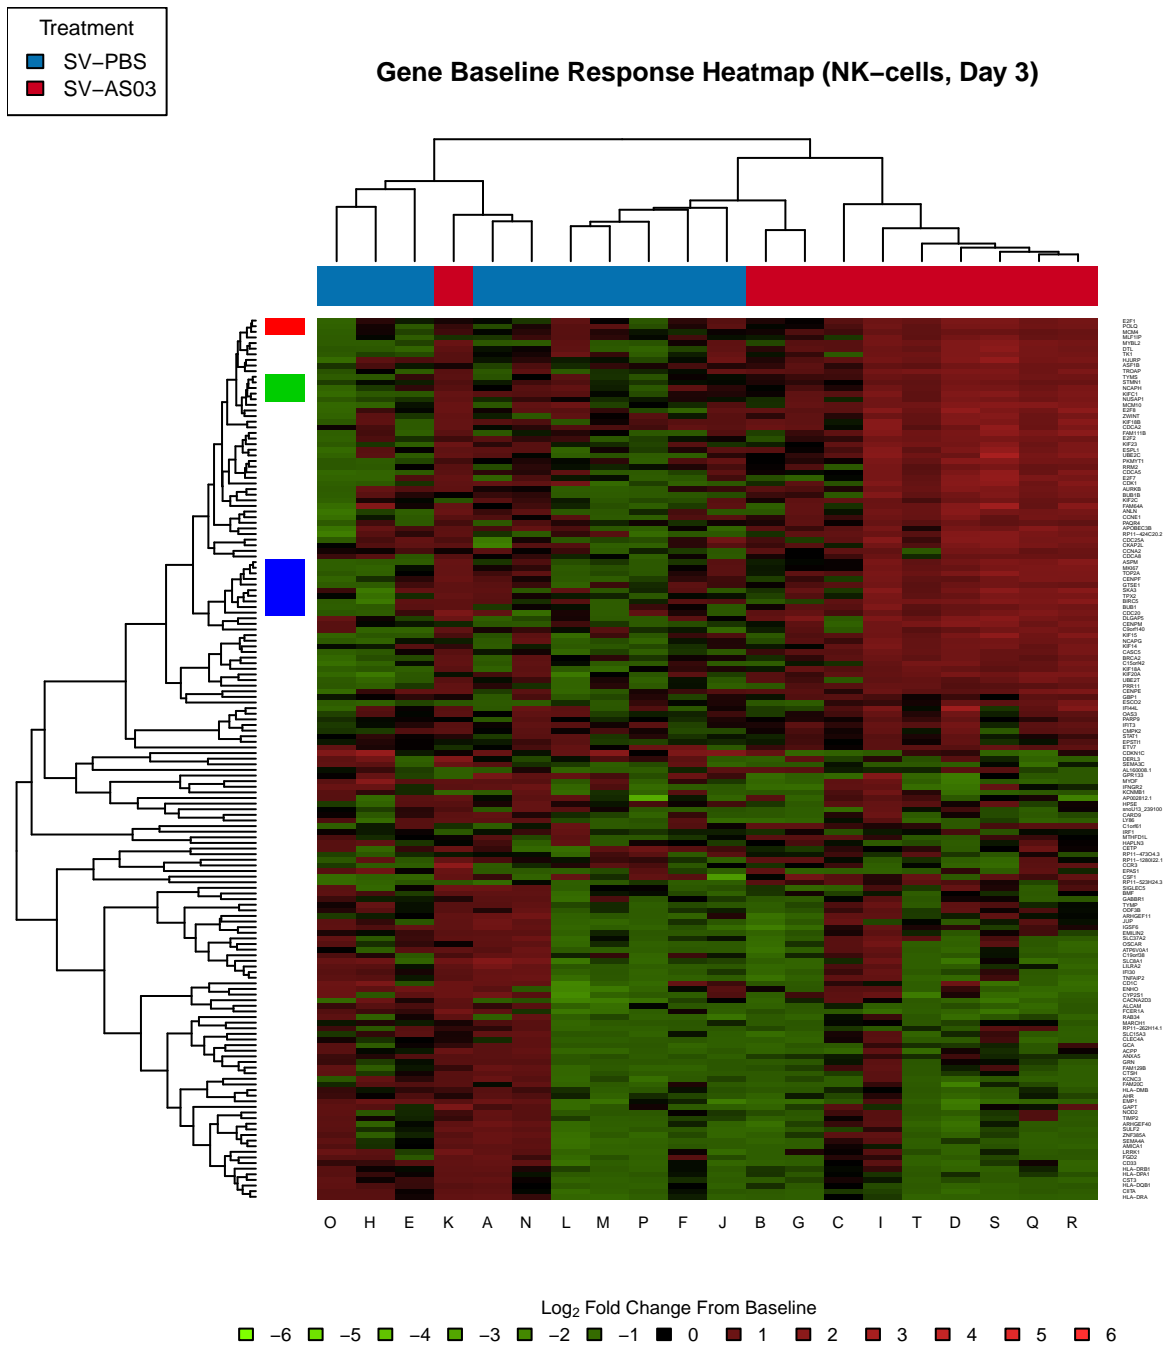

**Figure A72:** Heatmap of baseline log fold change (RNA-Seq, NK-cells, Day 3). Colored in red: up regulated from baseline; colored in green: down regulated from baseline. Dendrograms were obtained using complete linkage clustering of uncentered pairwise Pearson correlation distances between log fold changes. Significant gene cluster membership is highlighted along the gene dendrogram on the left side; vaccine group membership is highlighted below the subject dendrogram.



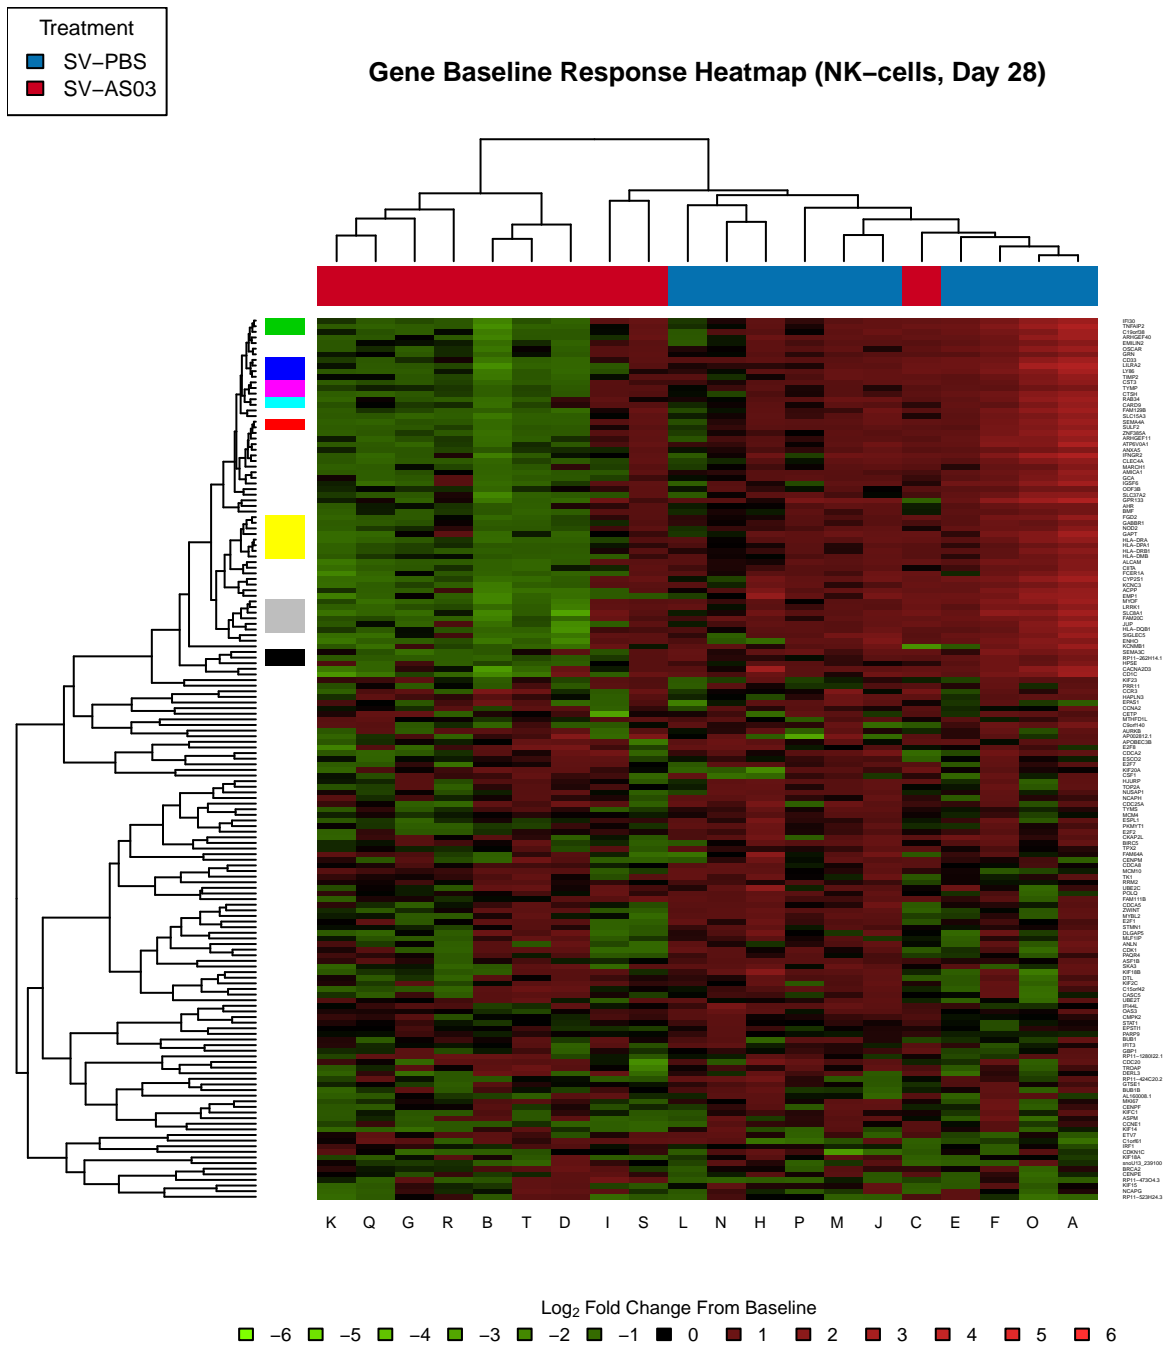

**Figure A74:** Heatmap of baseline log fold change (RNA-Seq, NK-cells, Day 28). Colored in red: up regulated from baseline; colored in green: down regulated from baseline. Dendrograms were obtained using complete linkage clustering of uncentered pairwise Pearson correlation distances between log fold changes. Significant gene cluster membership is highlighted along the gene dendrogram on the left side; vaccine group membership is highlighted below the subject dendrogram.

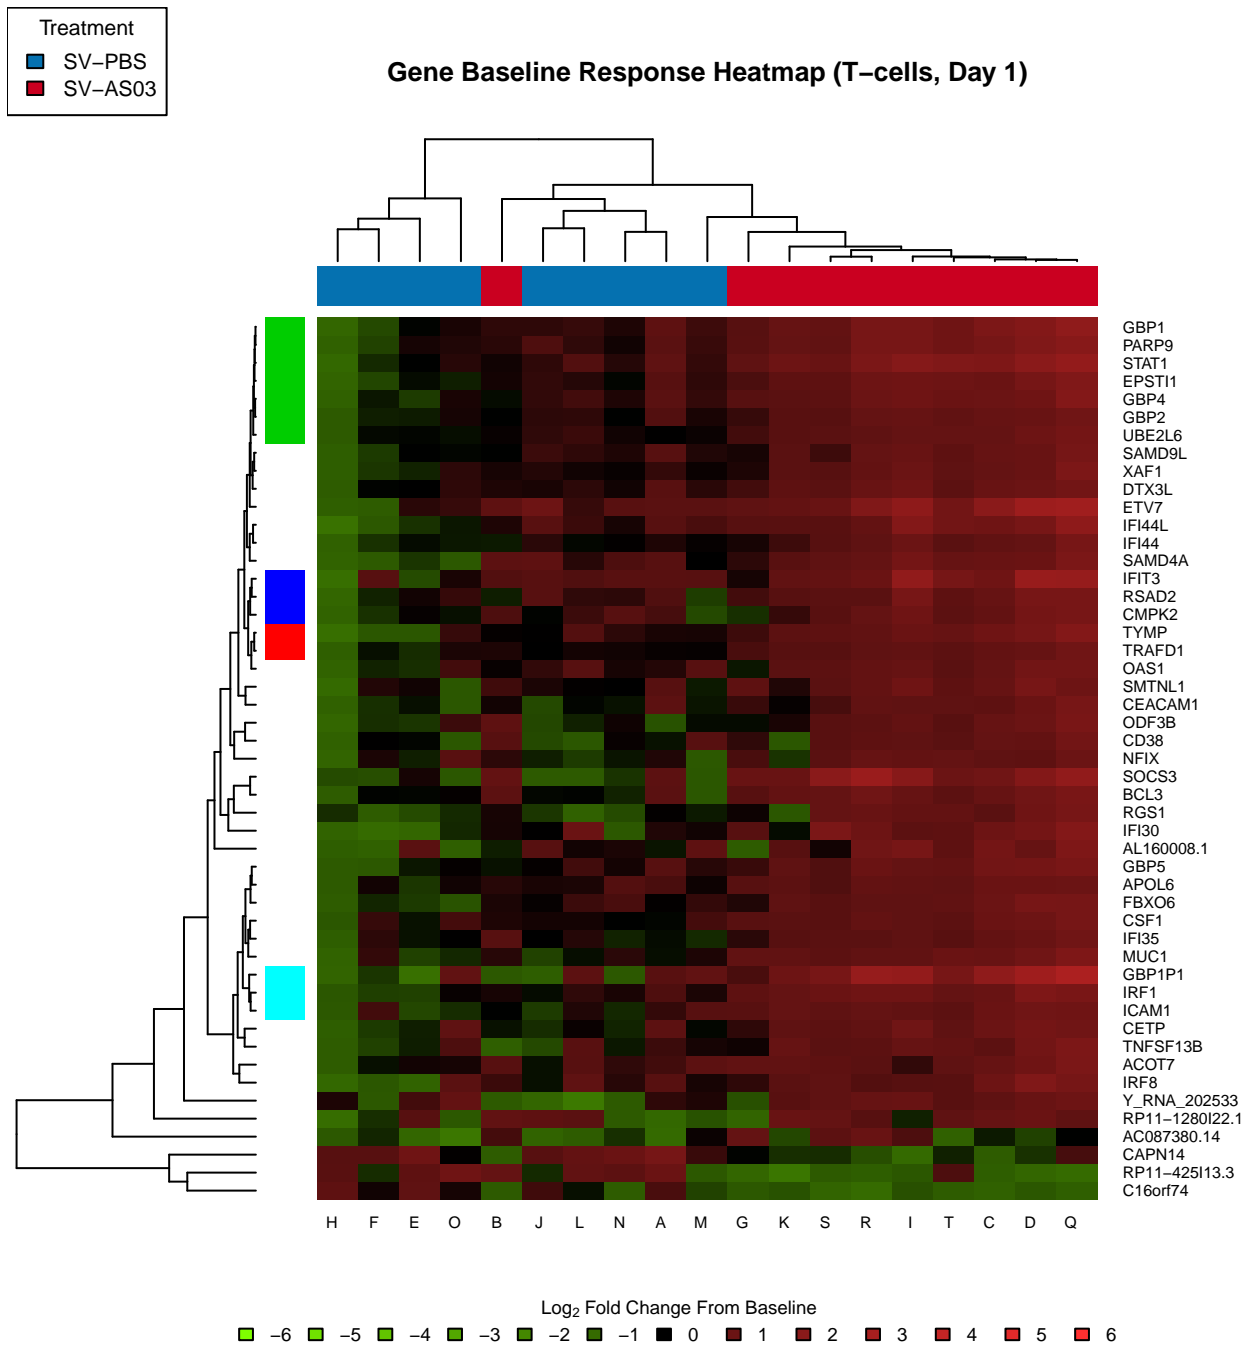

**Figure A75:** Heatmap of baseline log fold change (RNA-Seq, T-cells, Day 1). Colored in red: up regulated from baseline; colored in green: down regulated from baseline. Dendrograms were obtained using complete linkage clustering of uncentered pairwise Pearson correlation distances between log fold changes. Significant gene cluster membership is highlighted along the gene dendrogram on the left side; vaccine group membership is highlighted below the subject dendrogram.

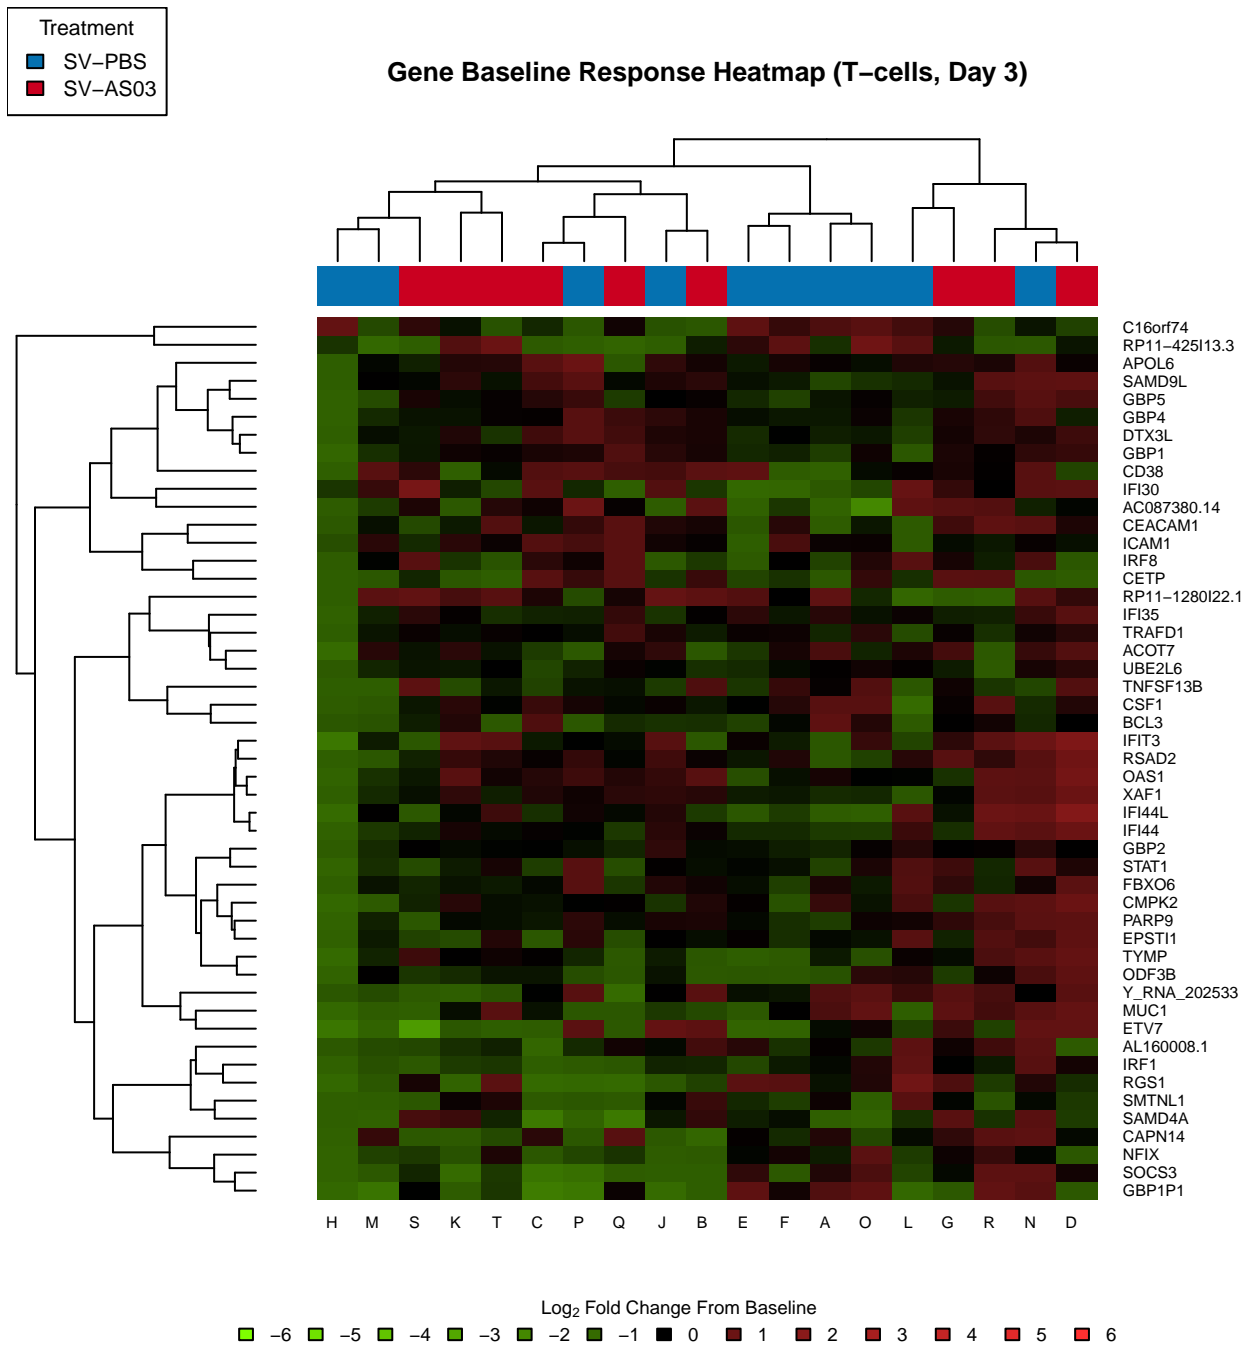

**Figure A76:** Heatmap of baseline log fold change (RNA-Seq, T-cells, Day 3). Colored in red: up regulated from baseline; colored in green: down regulated from baseline. Dendrograms were obtained using complete linkage clustering of uncentered pairwise Pearson correlation distances between log fold changes. Significant gene cluster membership is highlighted along the gene dendrogram on the left side; vaccine group membership is highlighted below the subject dendrogram.

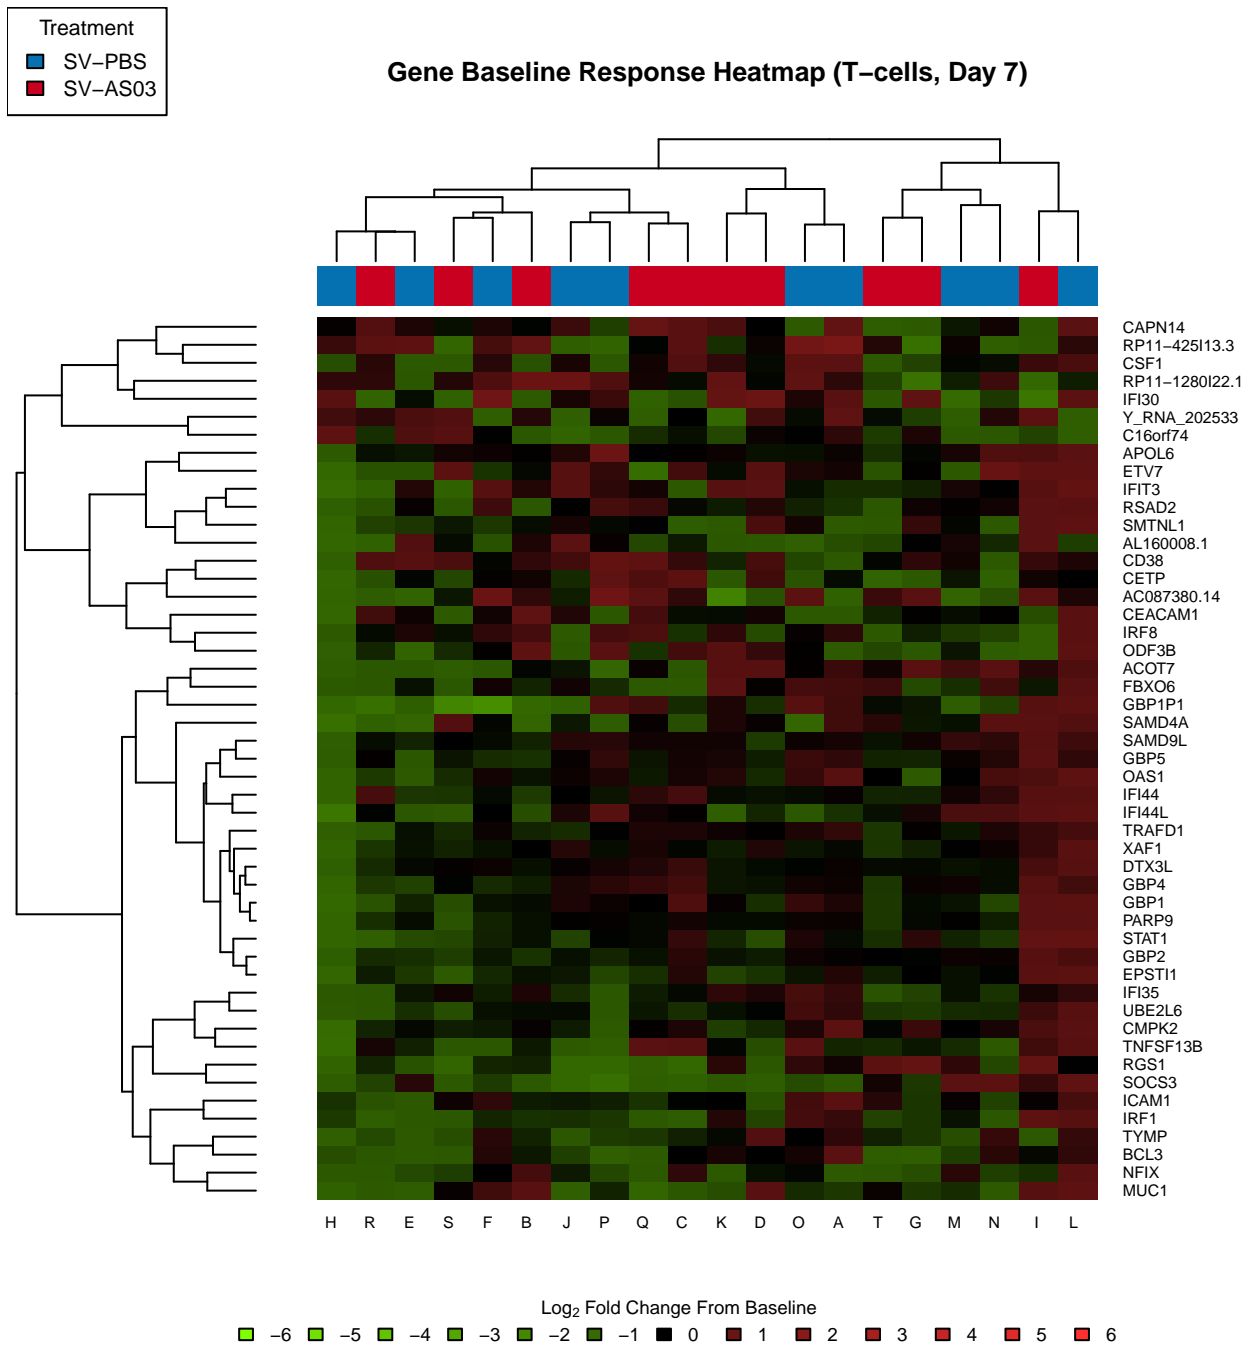

**Figure A77:** Heatmap of baseline log fold change (RNA-Seq, T-cells, Day 7). Colored in red: up regulated from baseline; colored in green: down regulated from baseline. Dendrograms were obtained using complete linkage clustering of uncentered pairwise Pearson correlation distances between log fold changes. Significant gene cluster membership is highlighted along the gene dendrogram on the left side; vaccine group membership is highlighted below the subject dendrogram.



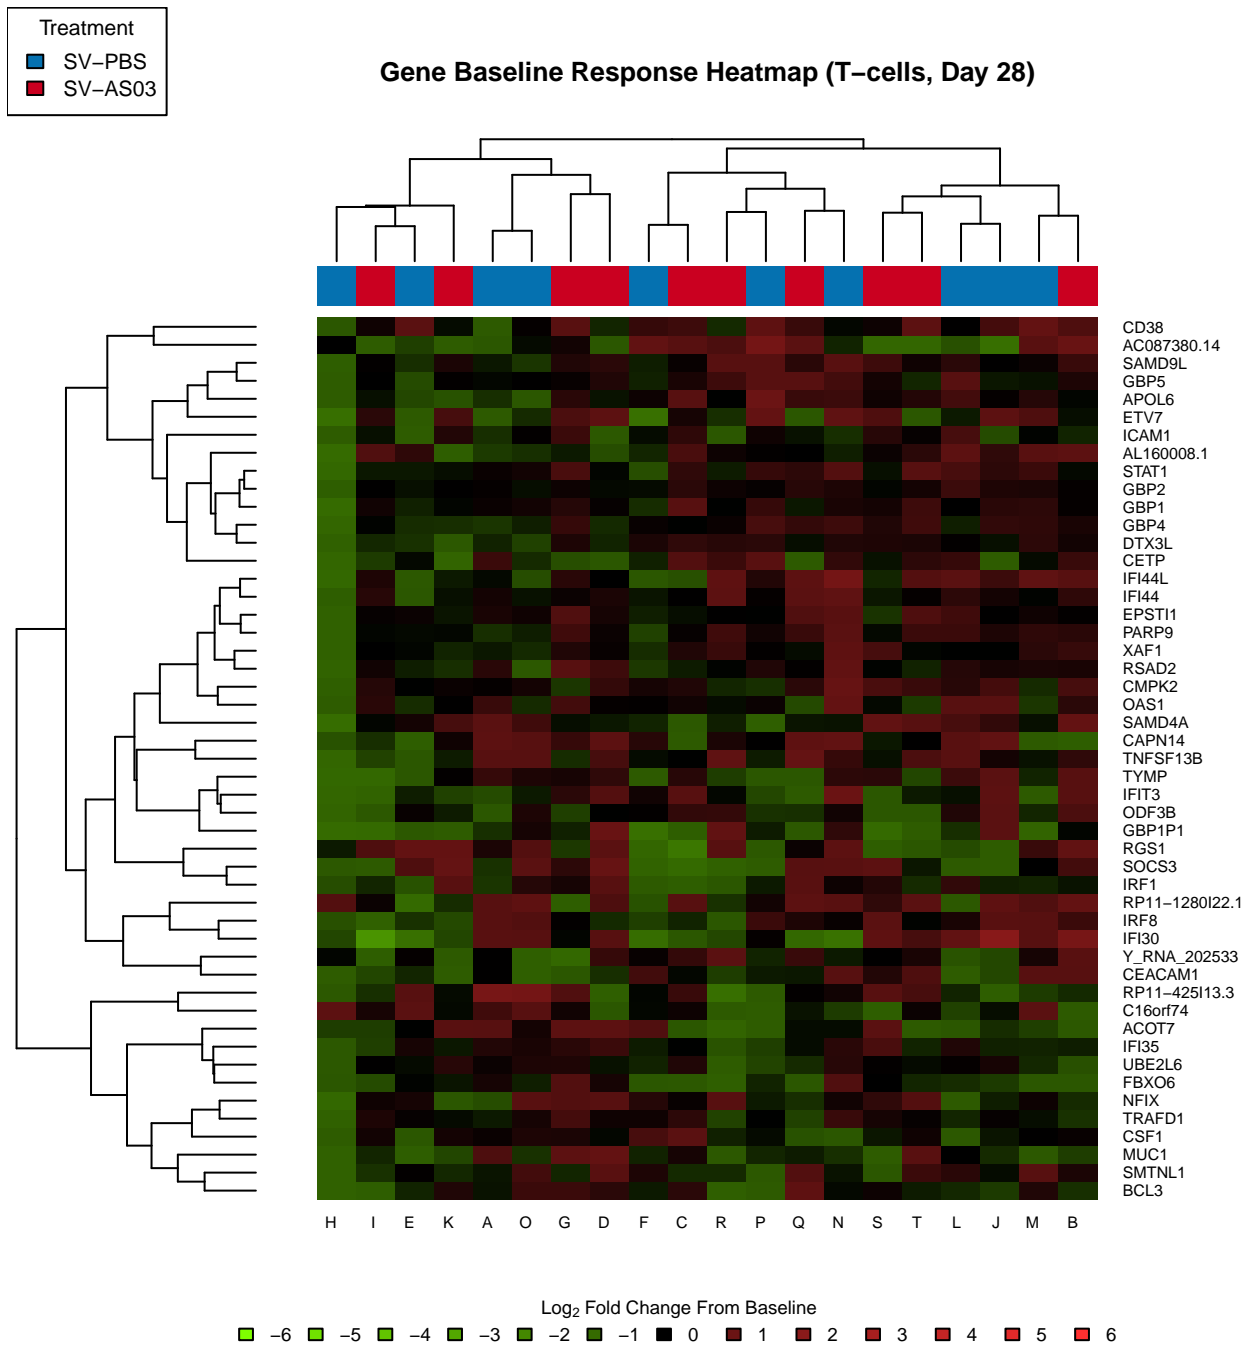

**Figure A78:** Heatmap of baseline log fold change (RNA-Seq, T-cells, Day 28). Colored in red: up regulated from baseline; colored in green: down regulated from baseline. Dendrograms were obtained using complete linkage clustering of uncentered pairwise Pearson correlation distances between log fold changes. Significant gene cluster membership is highlighted along the gene dendrogram on the left side; vaccine group membership is highlighted below the subject dendrogram.

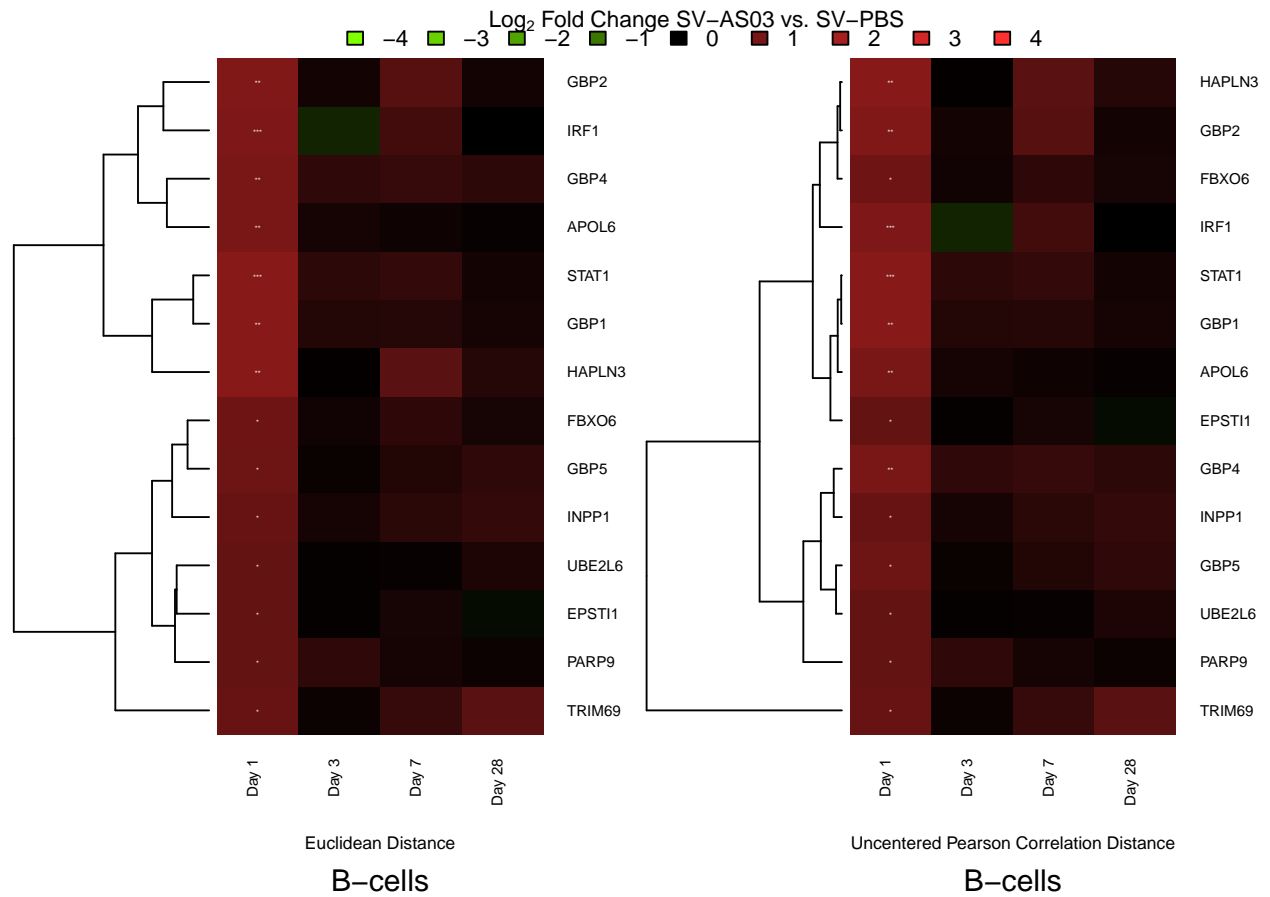

**Figure A79:** Heatmaps of GC adjusted log fold change (SV-AS03 vs. SV-PBS) over time (RNA-Seq, B-cells). Colored in red: up-regulated for SV-AS03; colored in green: down-regulated for SV-AS03. Asterisks mark genes that are significantly expressed at a certain day; FDR level (\*:0.05, \*\*:0.01, \*\*\*:0.001). Dendrograms were obtained using complete linkage clustering. Distances between fold changes were either based on the Euclidean (right panel) or uncentered pairwise Pearson correlation distance (right panel).

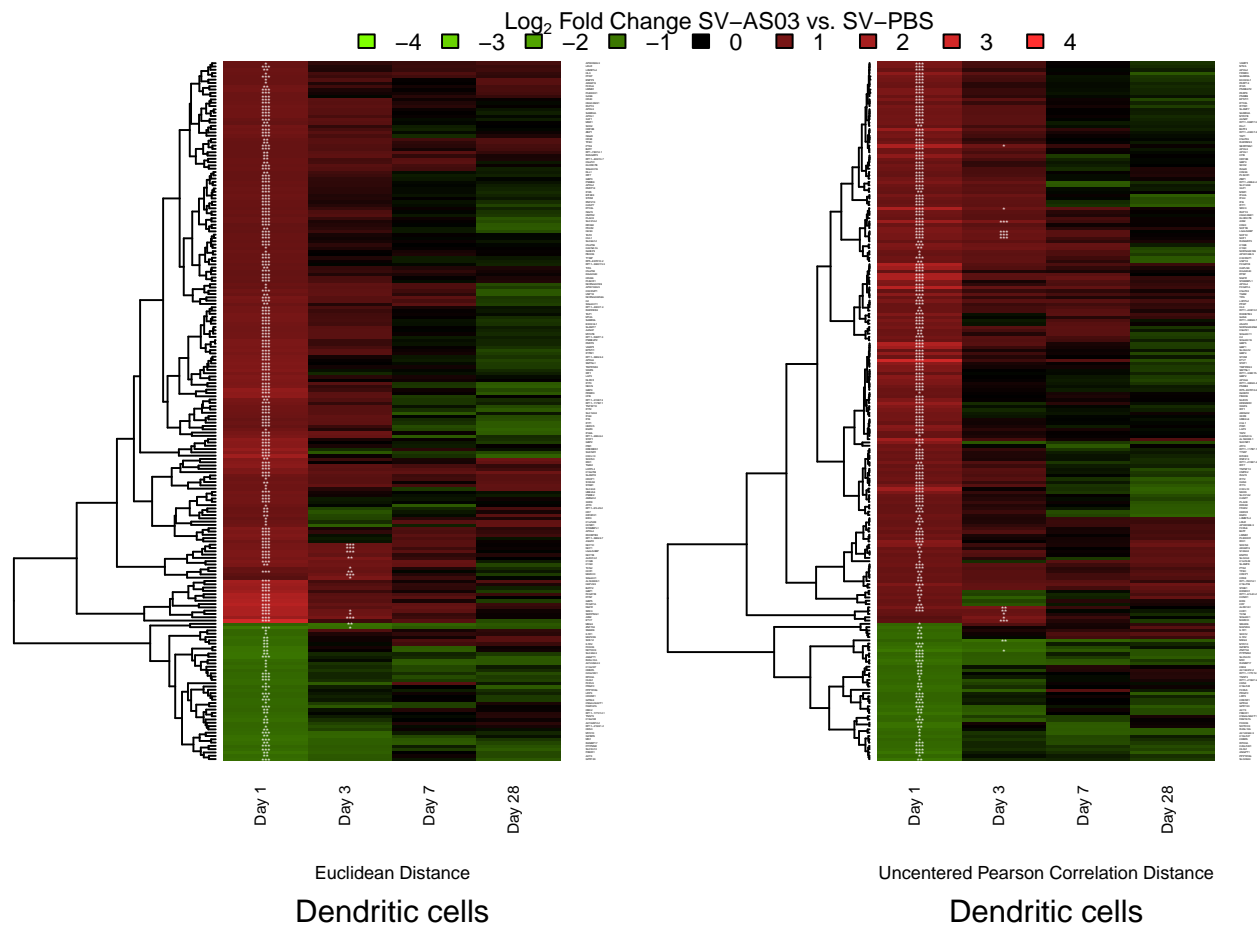

**Figure A80:** Heatmaps of GC adjusted log fold change (SV-AS03 vs. SV-PBS) over time (RNA-Seq, Dendritic cells). Colored in red: up-regulated for SV-AS03; colored in green: down-regulated for SV-AS03. Asterisks mark genes that are significantly expressed at a certain day; FDR level (\*:0.05, \*\*:0.01, \*\*\*:0.001). Dendrograms were obtained using complete linkage clustering. Distances between fold changes were either based on the Euclidean (left panel) or uncentered pairwise Pearson correlation distance (right panel).

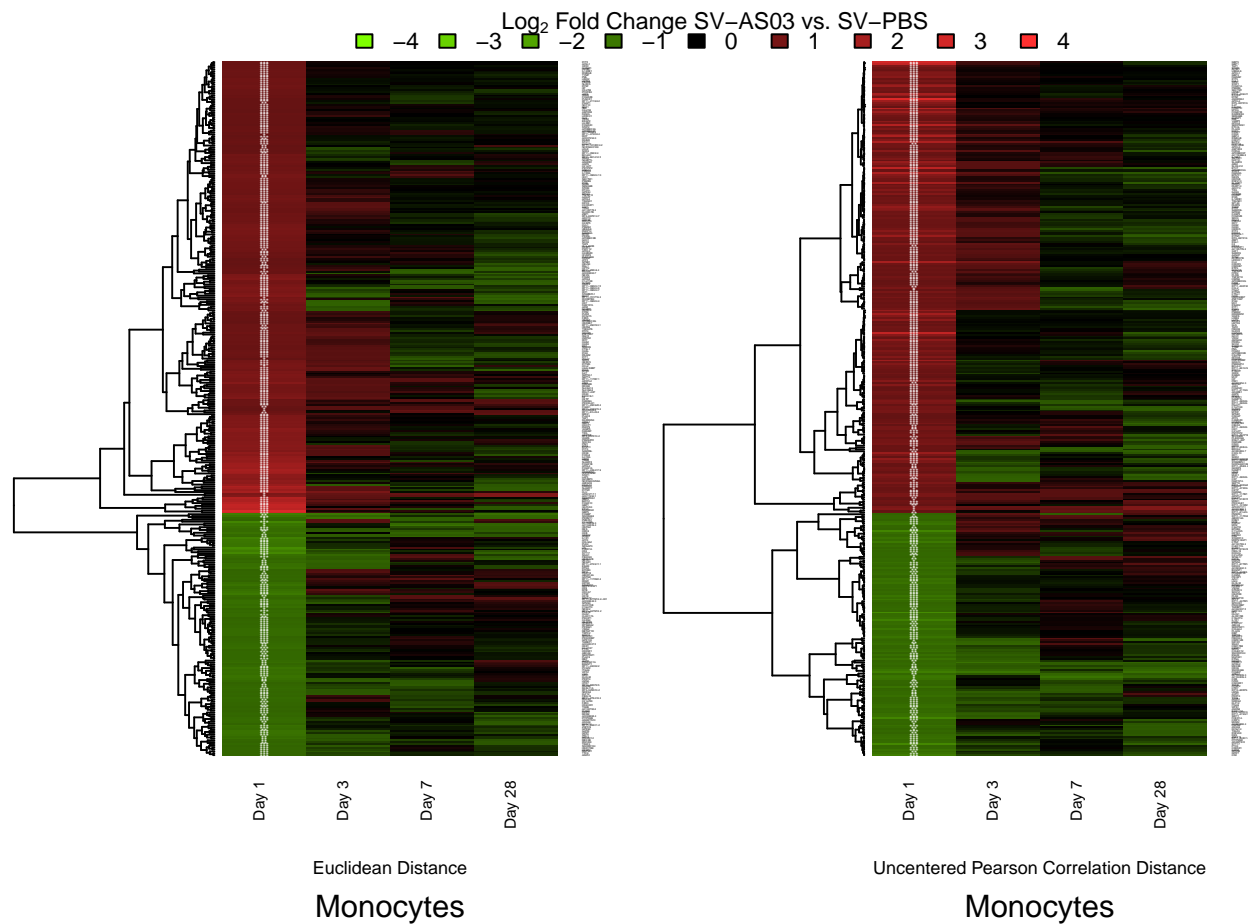

**Figure A81:** Heatmaps of GC adjusted log fold change (SV-AS03 vs. SV-PBS) over time (RNA-Seq, Monocytes). Colored in red: up-regulated for SV-AS03; colored in green: down-regulated for SV-AS03. Asterisks mark genes that are significantly expressed at a certain day; FDR level (\*:0.05, \*\*:0.01, \*\*\*:0.001). Dendrograms were obtained using complete linkage clustering. Distances between fold changes were either based on the Euclidean (right panel) or uncentered pairwise Pearson correlation distance (right panel).

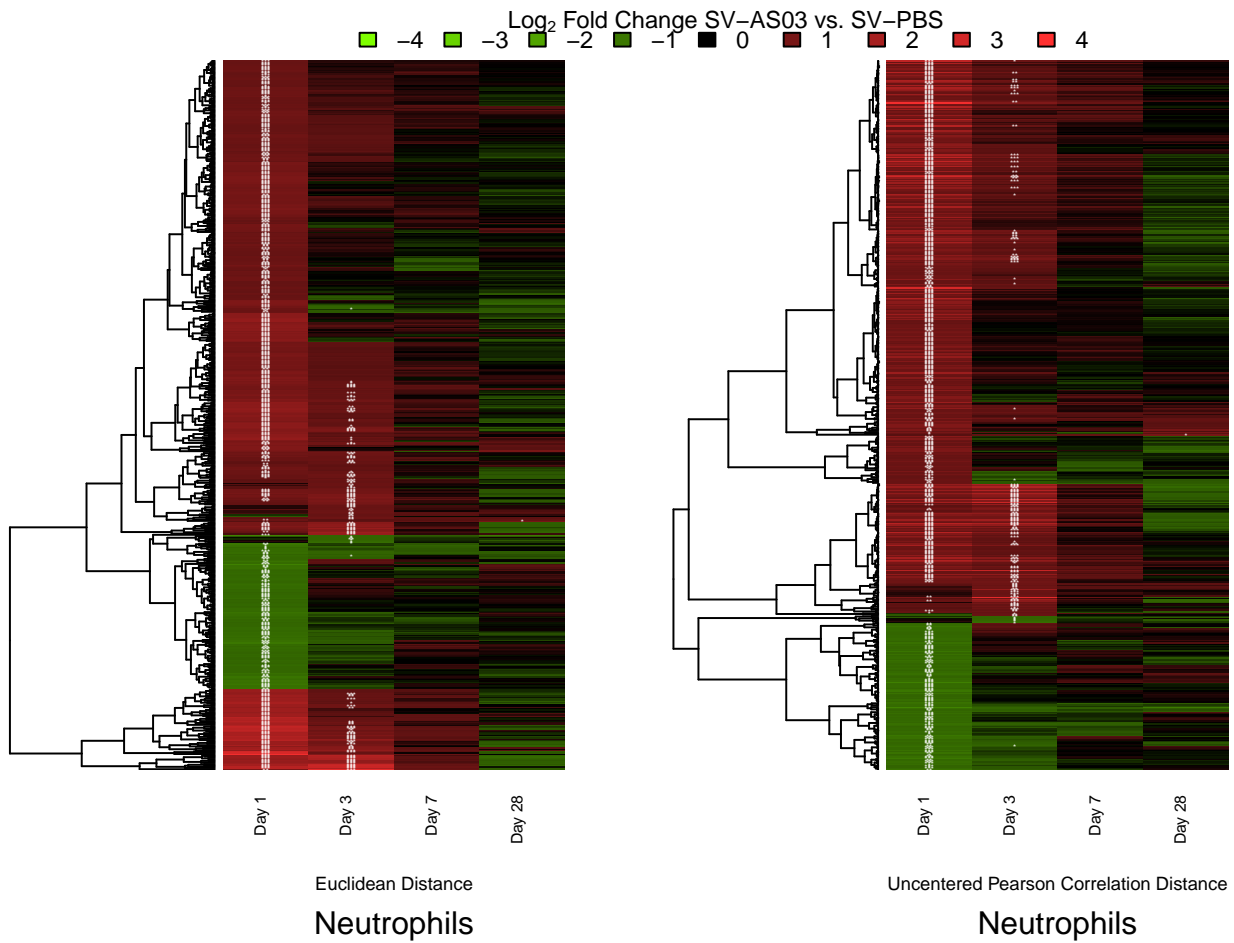

**Figure A82:** Heatmaps of GC adjusted log fold change (SV-AS03 vs. SV-PBS) over time (RNA-Seq, Neutrophils). Colored in red: up-regulated for SV-AS03; colored in green: down-regulated for SV-AS03. Asterisks mark genes that are significantly expressed at a certain day; FDR level (\*:0.05, \*\*:0.01, \*\*\*:0.001). Dendrograms were obtained using complete linkage clustering. Distances between fold changes were either based on the Euclidean (left panel) or uncentered pairwise Pearson correlation distance (right panel).

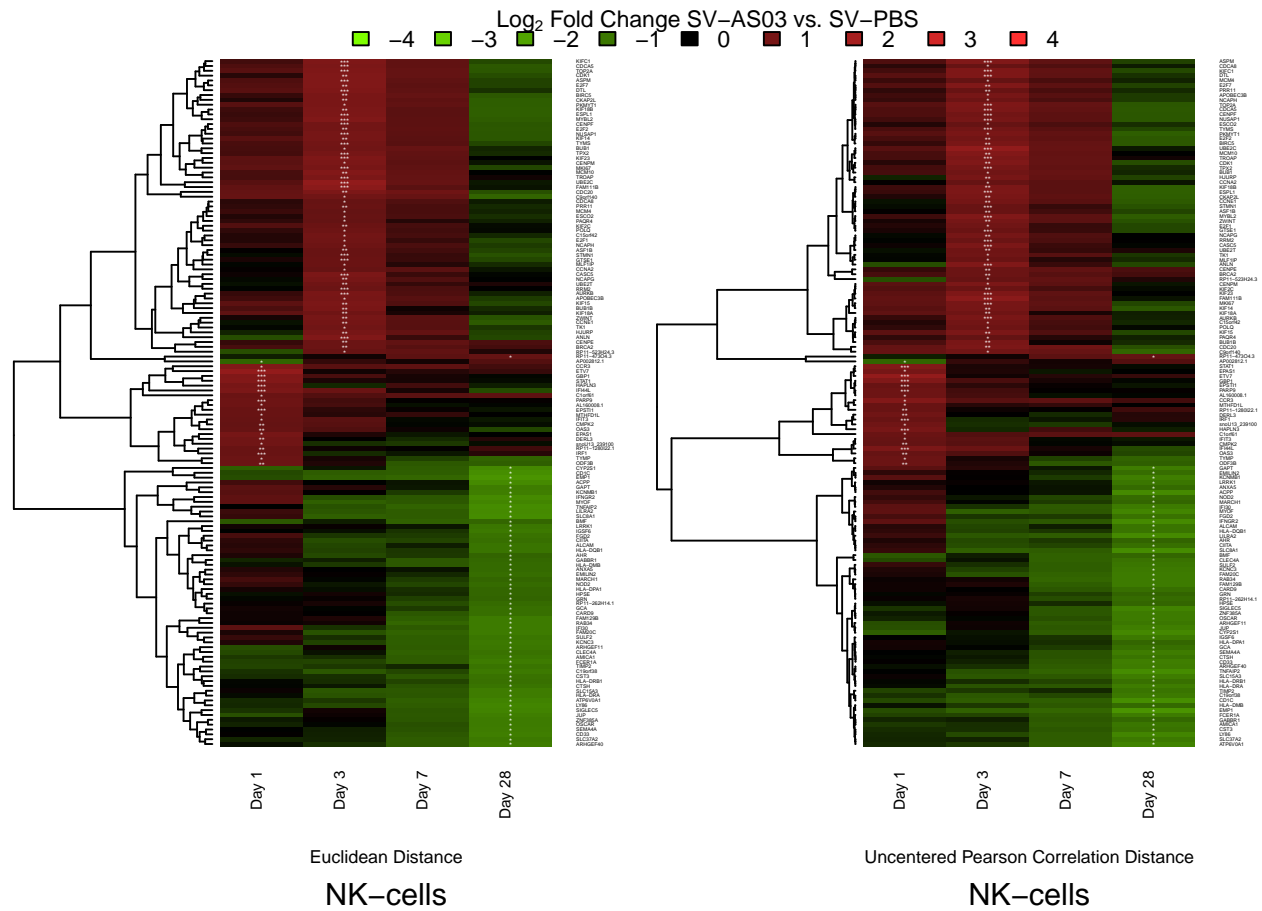

**Figure A83:** Heatmaps of GC adjusted log fold change (SV-AS03 vs. SV-PBS) over time (RNA-Seq, NK-cells). Colored in red: up-regulated for SV-AS03; colored in green: down-regulated for SV-AS03. Asterisks mark genes that are significantly expressed at a certain day; FDR level (\*:0.05, \*\*:0.01, \*\*\*:0.001). Dendrograms were obtained using complete linkage clustering. Distances between fold changes were either based on the Euclidean (right panel) or uncentered pairwise Pearson correlation distance (right panel).

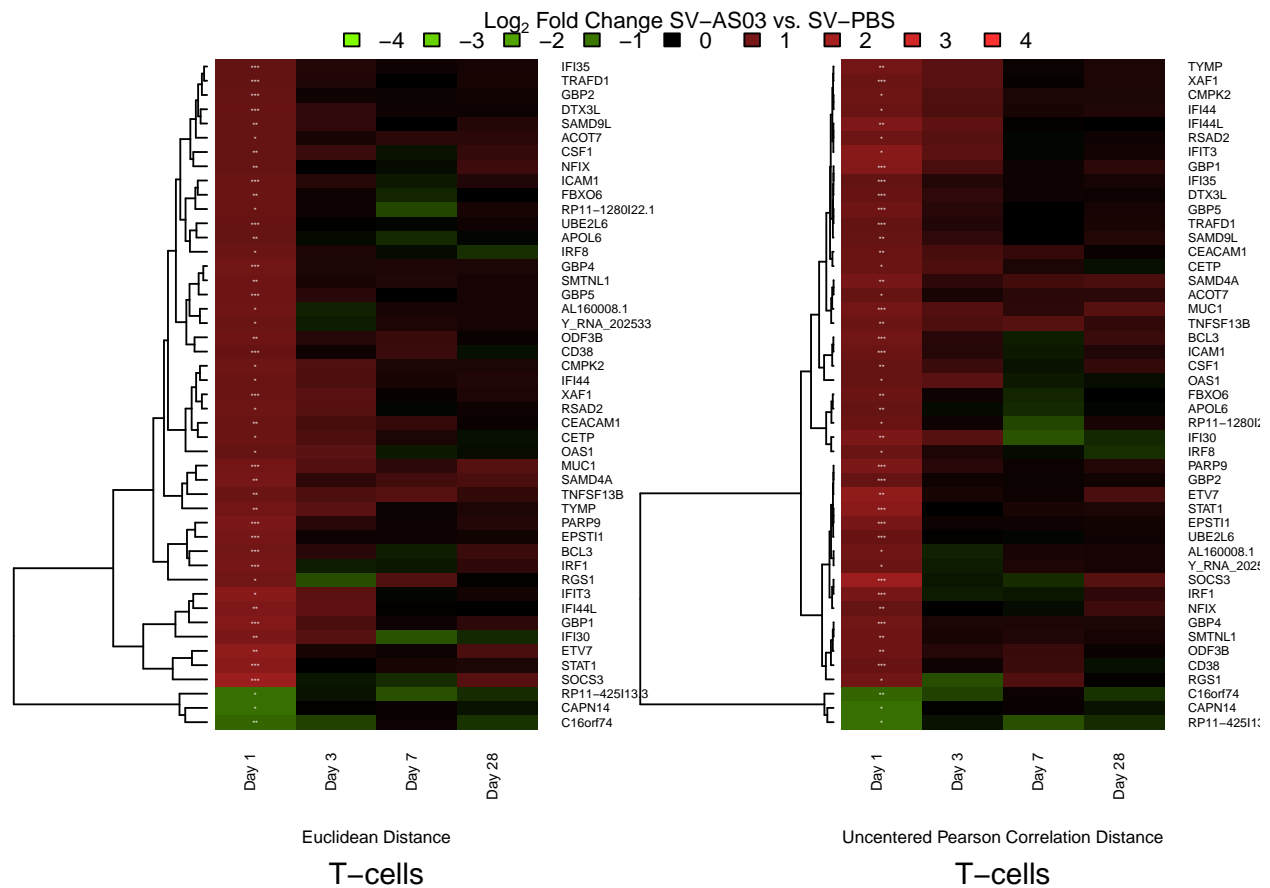

**Figure A84:** Heatmaps of GC adjusted log fold change (SV-AS03 vs. SV-PBS) over time (RNA-Seq, T-cells). Colored in red: up-regulated for SV-AS03; colored in green: down-regulated for SV-AS03. Asterisks mark genes that are significantly expressed at a certain day; FDR level (\*:0.05, \*\*:0.01, \*\*\*:0.001). Dendrograms were obtained using complete linkage clustering. Distances between fold changes were either based on the Euclidean (right panel) or uncentered pairwise Pearson correlation distance (right panel).

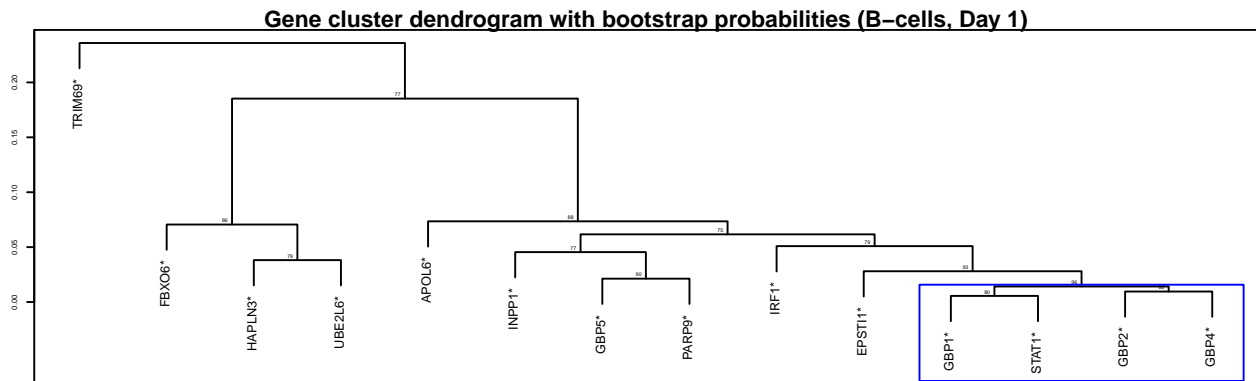

**Figure A85:** Gene cluster dendrogram with bootstrap probabilities (RNA-Seq, B-cells, Day 1). The y axis shows the distance at which clusters were formed by the complete linkage clustering algorithm based on uncentered Pearson correlation distance between log fold changes. Multiscale bootstrap probabilities are shown at each branch intersection. Significant clusters are highlighted in blue. Asterisks indicate genes that were significantly expressed at a certain day.

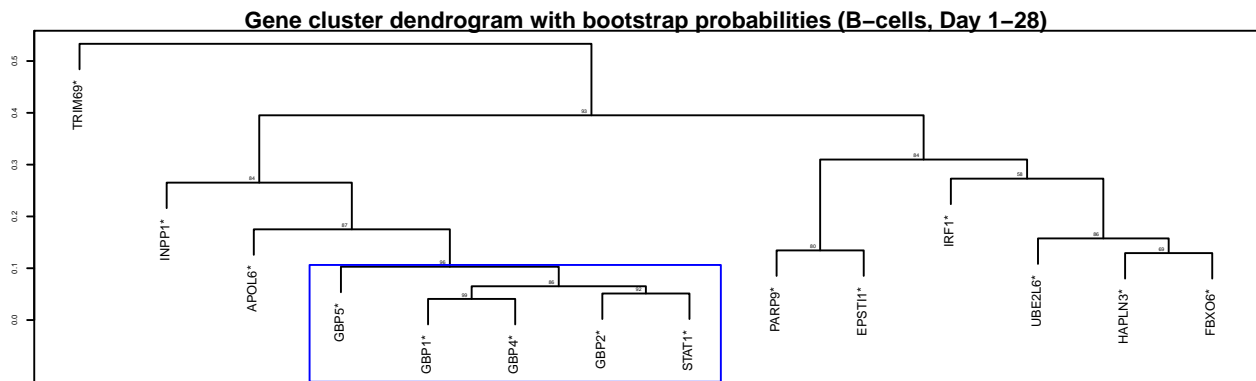

**Figure A86:** Gene cluster dendrogram with bootstrap probabilities (RNA-Seq, B-cells, Day 1-28). The y axis shows the distance at which clusters were formed by the complete linkage clustering algorithm based on uncentered Pearson correlation distance between log fold changes. Multiscale bootstrap probabilities are shown at each branch intersection. Significant clusters are highlighted in blue. Asterisks indicate genes that were significantly expressed at a certain day.



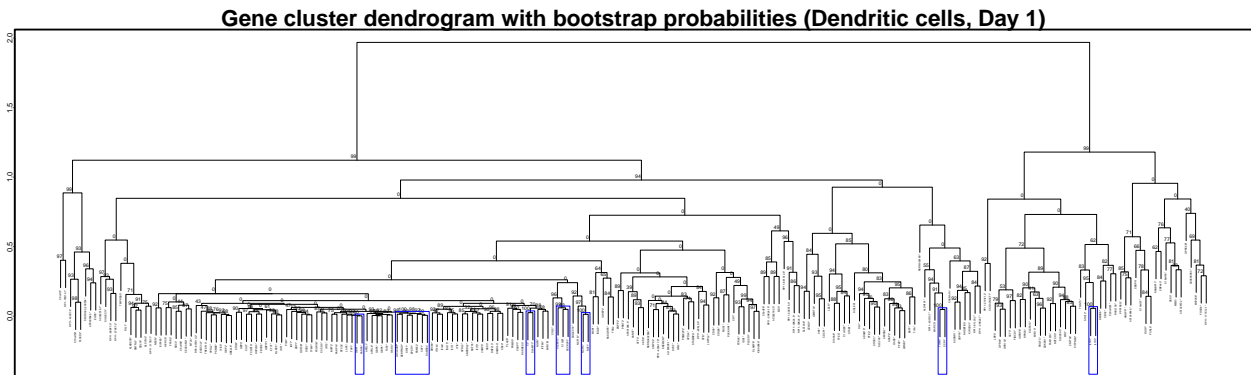

**Figure A87:** Gene cluster dendrogram with bootstrap probabilities (RNA-Seq, Dendritic cells, Day 1). The y axis shows the distance at which clusters were formed by the complete linkage clustering algorithm based on uncentered Pearson correlation distance between log fold changes. Multiscale bootstrap probabilities are shown at each branch intersection. Significant clusters are highlighted in blue. Asterisks indicate genes that were significantly expressed at a certain day.

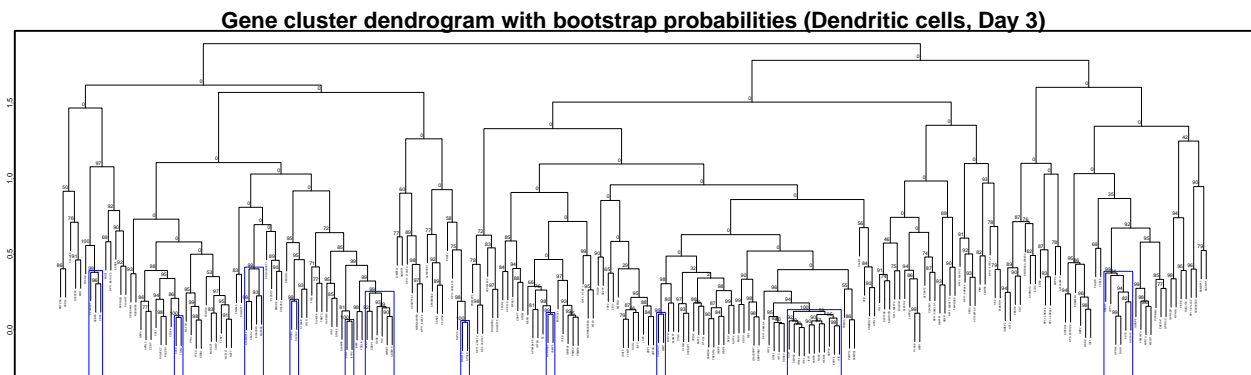

**Figure A88:** Gene cluster dendrogram with bootstrap probabilities (RNA-Seq, Dendritic cells, Day 3). The y axis shows the distance at which clusters were formed by the complete linkage clustering algorithm based on uncentered Pearson correlation distance between log fold changes. Multiscale bootstrap probabilities are shown at each branch intersection. Significant clusters are highlighted in blue. Asterisks indicate genes that were significantly expressed at a certain day.

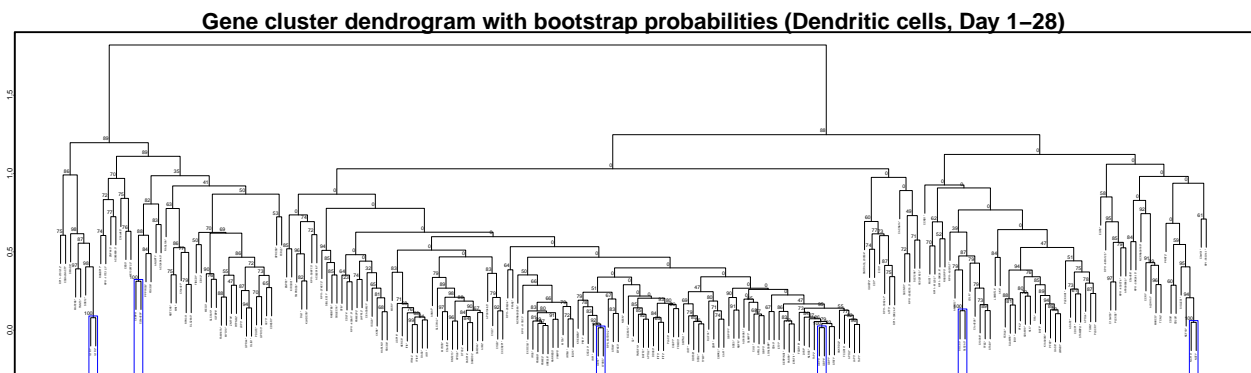

**Figure A89:** Gene cluster dendrogram with bootstrap probabilities (RNA-Seq, Dendritic cells, Day 1-28). The y axis shows the distance at which clusters were formed by the complete linkage clustering algorithm based on uncentered Pearson correlation distance between log fold changes. Multiscale bootstrap probabilities are shown at each branch intersection. Significant clusters are highlighted in blue. Asterisks indicate genes that were significantly expressed at a certain day.

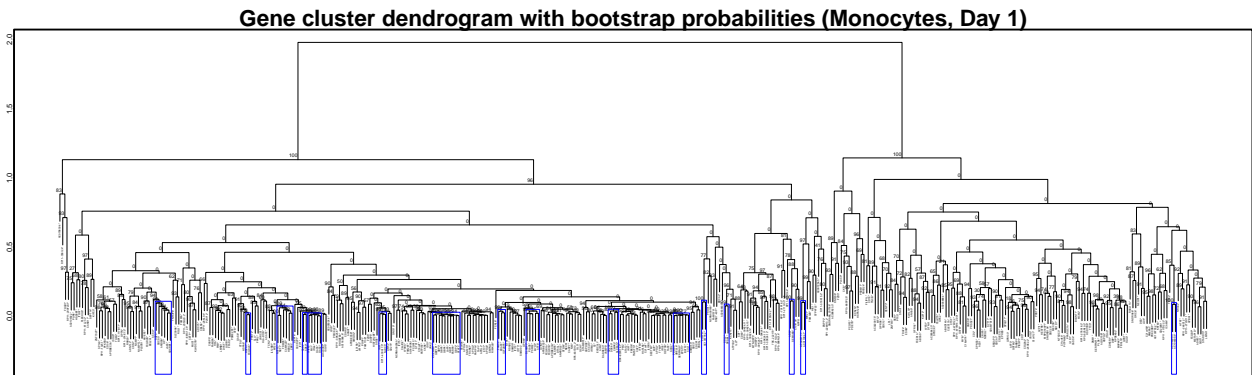

**Figure A90:** Gene cluster dendrogram with bootstrap probabilities (RNA-Seq, Monocytes, Day 1). The y axis shows the distance at which clusters were formed by the complete linkage clustering algorithm based on uncentered Pearson correlation distance between log fold changes. Multiscale bootstrap probabilities are shown at each branch intersection. Significant clusters are highlighted in blue. Asterisks indicate genes that were significantly expressed at a certain day.

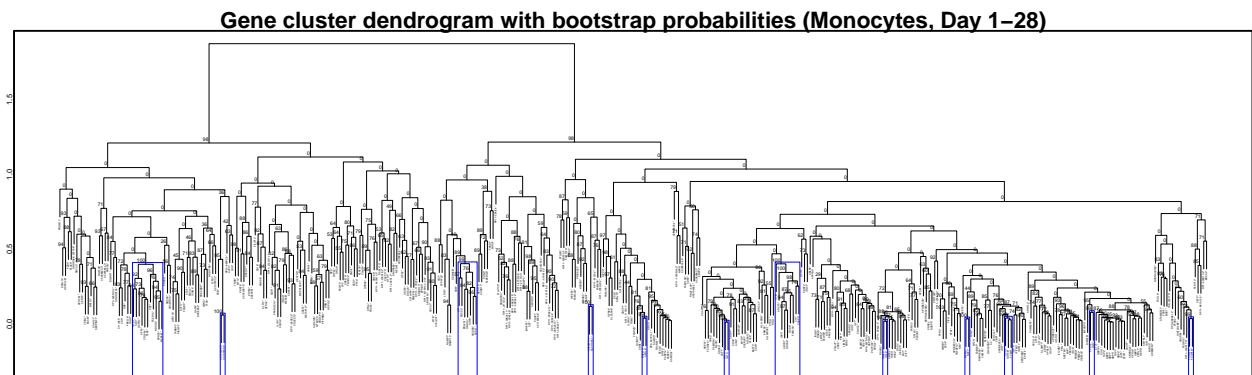

**Figure A91:** Gene cluster dendrogram with bootstrap probabilities (RNA-Seq, Monocytes, Day 1-28). The y axis shows the distance at which clusters were formed by the complete linkage clustering algorithm based on uncentered Pearson correlation distance between log fold changes. Multiscale bootstrap probabilities are shown at each branch intersection. Significant clusters are highlighted in blue. Asterisks indicate genes that were significantly expressed at a certain day.

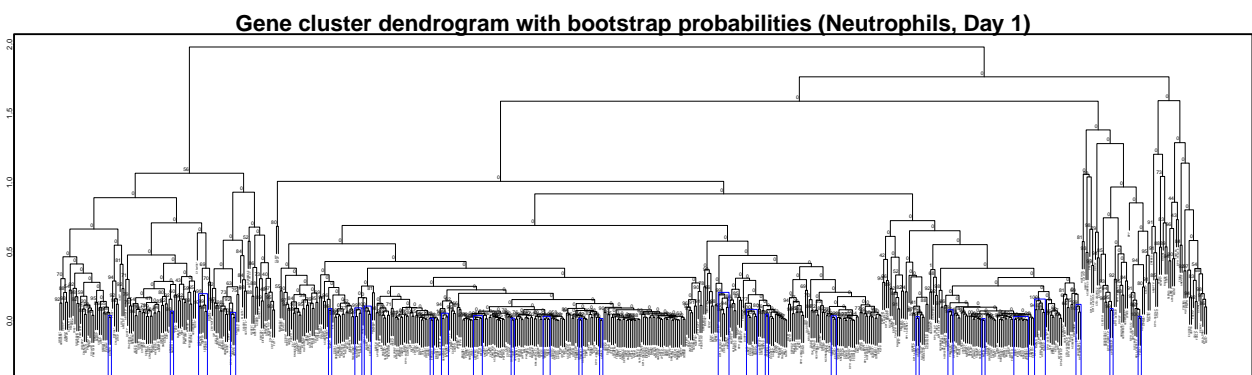

**Figure A92:** Gene cluster dendrogram with bootstrap probabilities (RNA-Seq, Neutrophils, Day 1). The y axis shows the distance at which clusters were formed by the complete linkage clustering algorithm based on uncentered Pearson correlation distance between log fold changes. Multiscale bootstrap probabilities are shown at each branch intersection. Significant clusters are highlighted in blue. Asterisks indicate genes that were significantly expressed at a certain day.

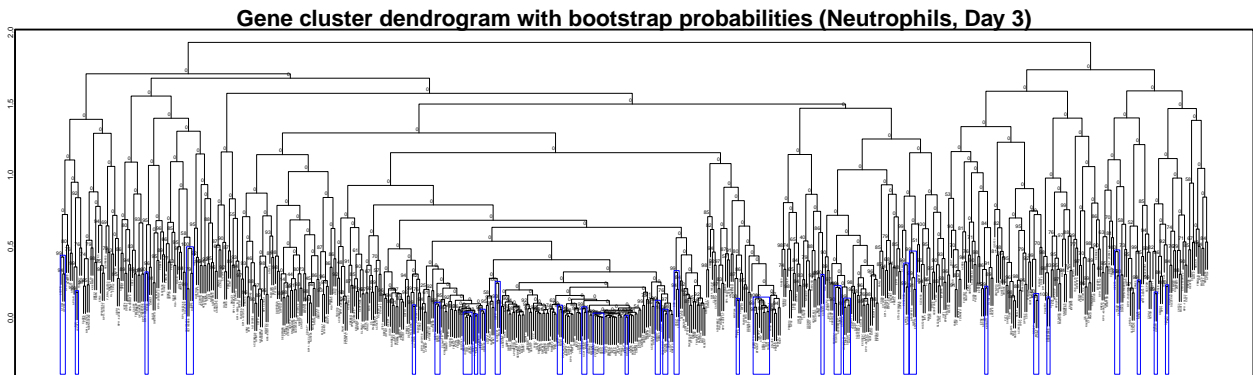

**Figure A93:** Gene cluster dendrogram with bootstrap probabilities (RNA-Seq, Neutrophils, Day 3). The y axis shows the distance at which clusters were formed by the complete linkage clustering algorithm based on uncentered Pearson correlation distance between log fold changes. Multiscale bootstrap probabilities are shown at each branch intersection. Significant clusters are highlighted in blue. Asterisks indicate genes that were significantly expressed at a certain day.

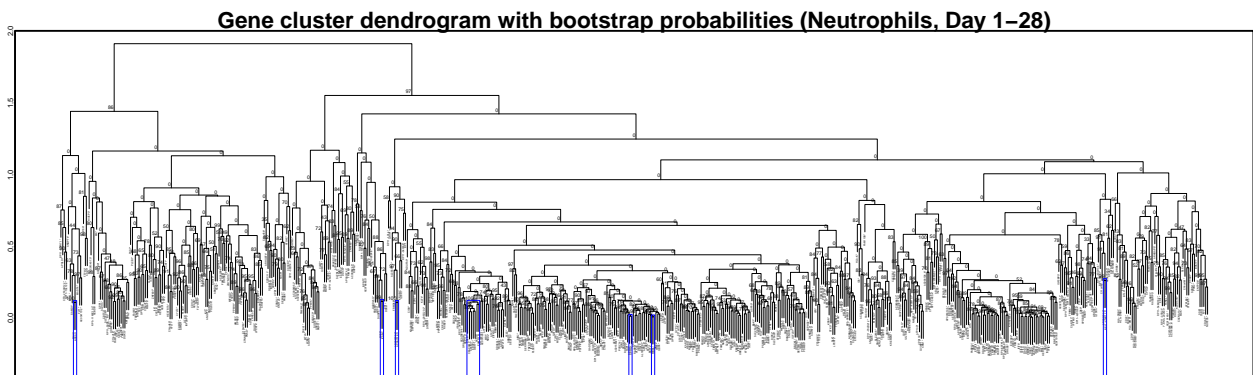

**Figure A94:** Gene cluster dendrogram with bootstrap probabilities (RNA-Seq, Neutrophils, Day 1-28). The y axis shows the distance at which clusters were formed by the complete linkage clustering algorithm based on uncentered Pearson correlation distance between log fold changes. Multiscale bootstrap probabilities are shown at each branch intersection. Significant clusters are highlighted in blue. Asterisks indicate genes that were significantly expressed at a certain day.

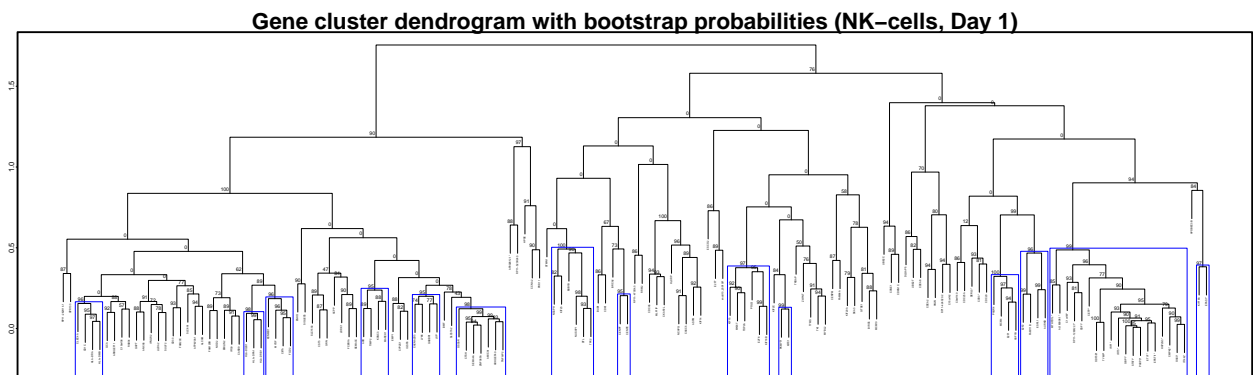

**Figure A95:** Gene cluster dendrogram with bootstrap probabilities (RNA-Seq, NK-cells, Day 1). The y axis shows the distance at which clusters were formed by the complete linkage clustering algorithm based on uncentered Pearson correlation distance between log fold changes. Multiscale bootstrap probabilities are shown at each branch intersection. Significant clusters are highlighted in blue. Asterisks indicate genes that were significantly expressed at a certain day.

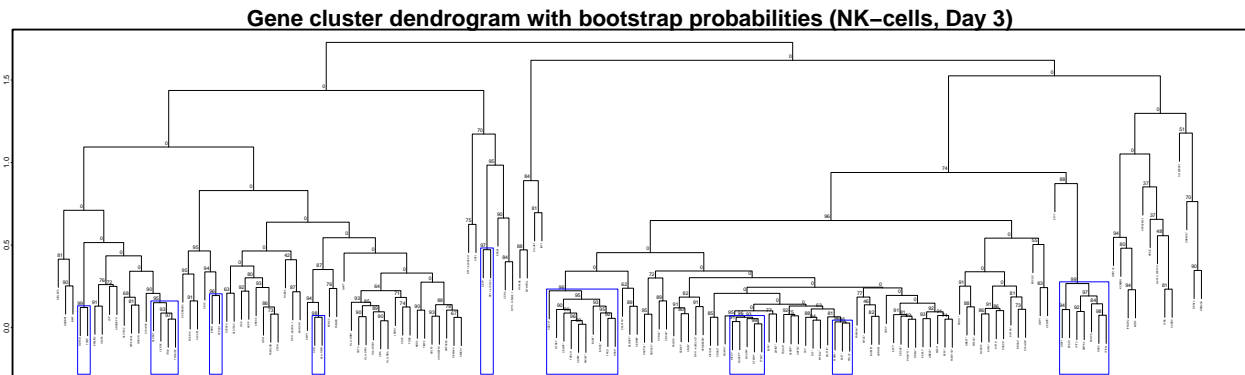

**Figure A96:** Gene cluster dendrogram with bootstrap probabilities (RNA-Seq, NK-cells, Day 3). The y axis shows the distance at which clusters were formed by the complete linkage clustering algorithm based on uncentered Pearson correlation distance between log fold changes. Multiscale bootstrap probabilities are shown at each branch intersection. Significant clusters are highlighted in blue. Asterisks indicate genes that were significantly expressed at a certain day.

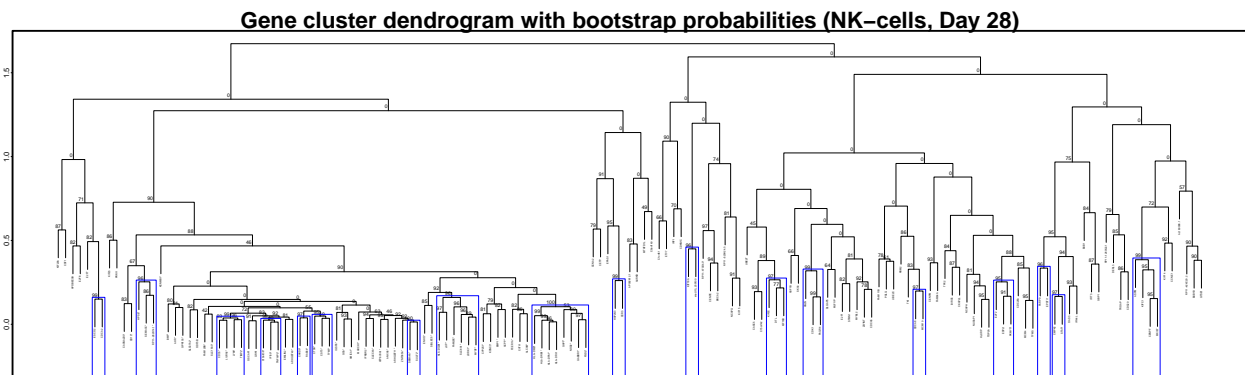

**Figure A97:** Gene cluster dendrogram with bootstrap probabilities (RNA-Seq, NK-cells, Day 28). The y axis shows the distance at which clusters were formed by the complete linkage clustering algorithm based on uncentered Pearson correlation distance between log fold changes. Multiscale bootstrap probabilities are shown at each branch intersection. Significant clusters are highlighted in blue. Asterisks indicate genes that were significantly expressed at a certain day.

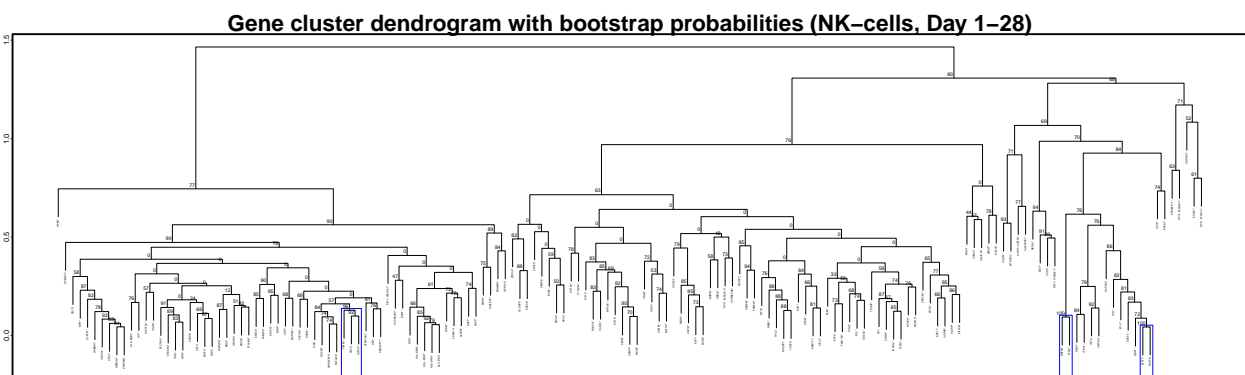

**Figure A98:** Gene cluster dendrogram with bootstrap probabilities (RNA-Seq, NK-cells, Day 1-28). The y axis shows the distance at which clusters were formed by the complete linkage clustering algorithm based on uncentered Pearson correlation distance between log fold changes. Multiscale bootstrap probabilities are shown at each branch intersection. Significant clusters are highlighted in blue. Asterisks indicate genes that were significantly expressed at a certain day.

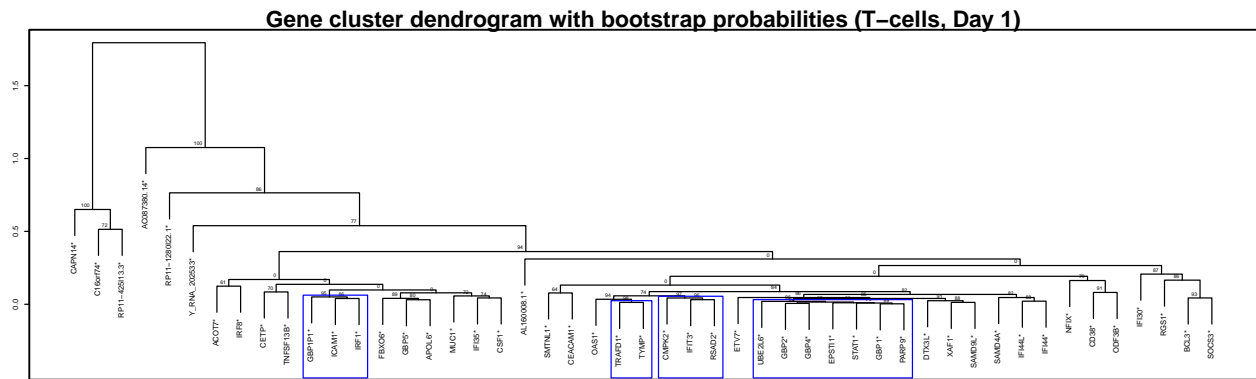

**Figure A99:** Gene cluster dendrogram with bootstrap probabilities (RNA-Seq, T-cells, Day 1). The y axis shows the distance at which clusters were formed by the complete linkage clustering algorithm based on uncentered Pearson correlation distance between log fold changes. Multiscale bootstrap probabilities are shown at each branch intersection. Significant clusters are highlighted in blue. Asterisks indicate genes that were significantly expressed at a certain day.

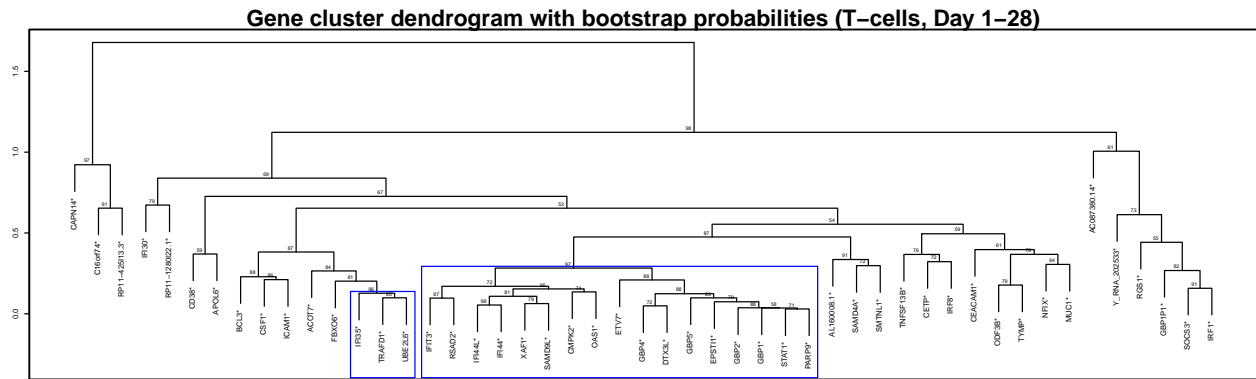

**Figure A100:** Gene cluster dendrogram with bootstrap probabilities (RNA-Seq, T-cells, Day 1-28). The y axis shows the distance at which clusters were formed by the complete linkage clustering algorithm based on uncentered Pearson correlation distance between log fold changes. Multiscale bootstrap probabilities are shown at each branch intersection. Significant clusters are highlighted in blue. Asterisks indicate genes that were significantly expressed at a certain day.

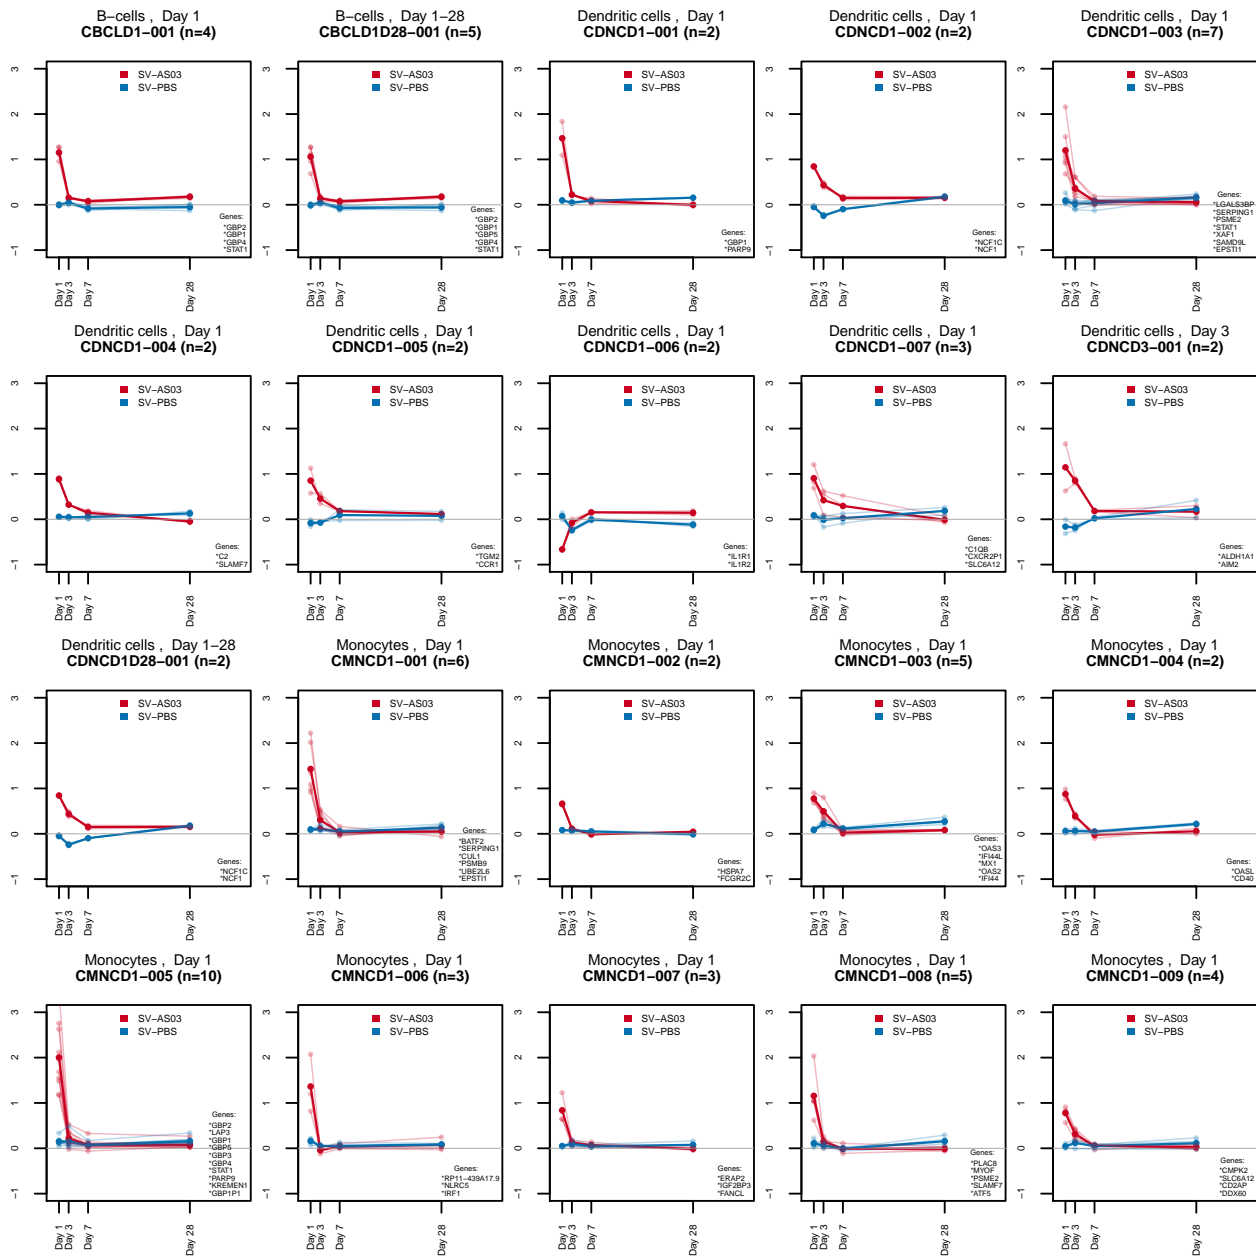

**Figure A101:** Gene cluster time trends of baseline log fold change by vaccine group (RNA-Seq, B-cells, Dendritic cells, and Monocytes). Header indicates cluster ID. Mean log fold change across cluster genes is drawn in bold. Individual mean gene log fold changes are plotted in lighter colors. Asterisks indicate significantly differentially expressed genes for a given day.

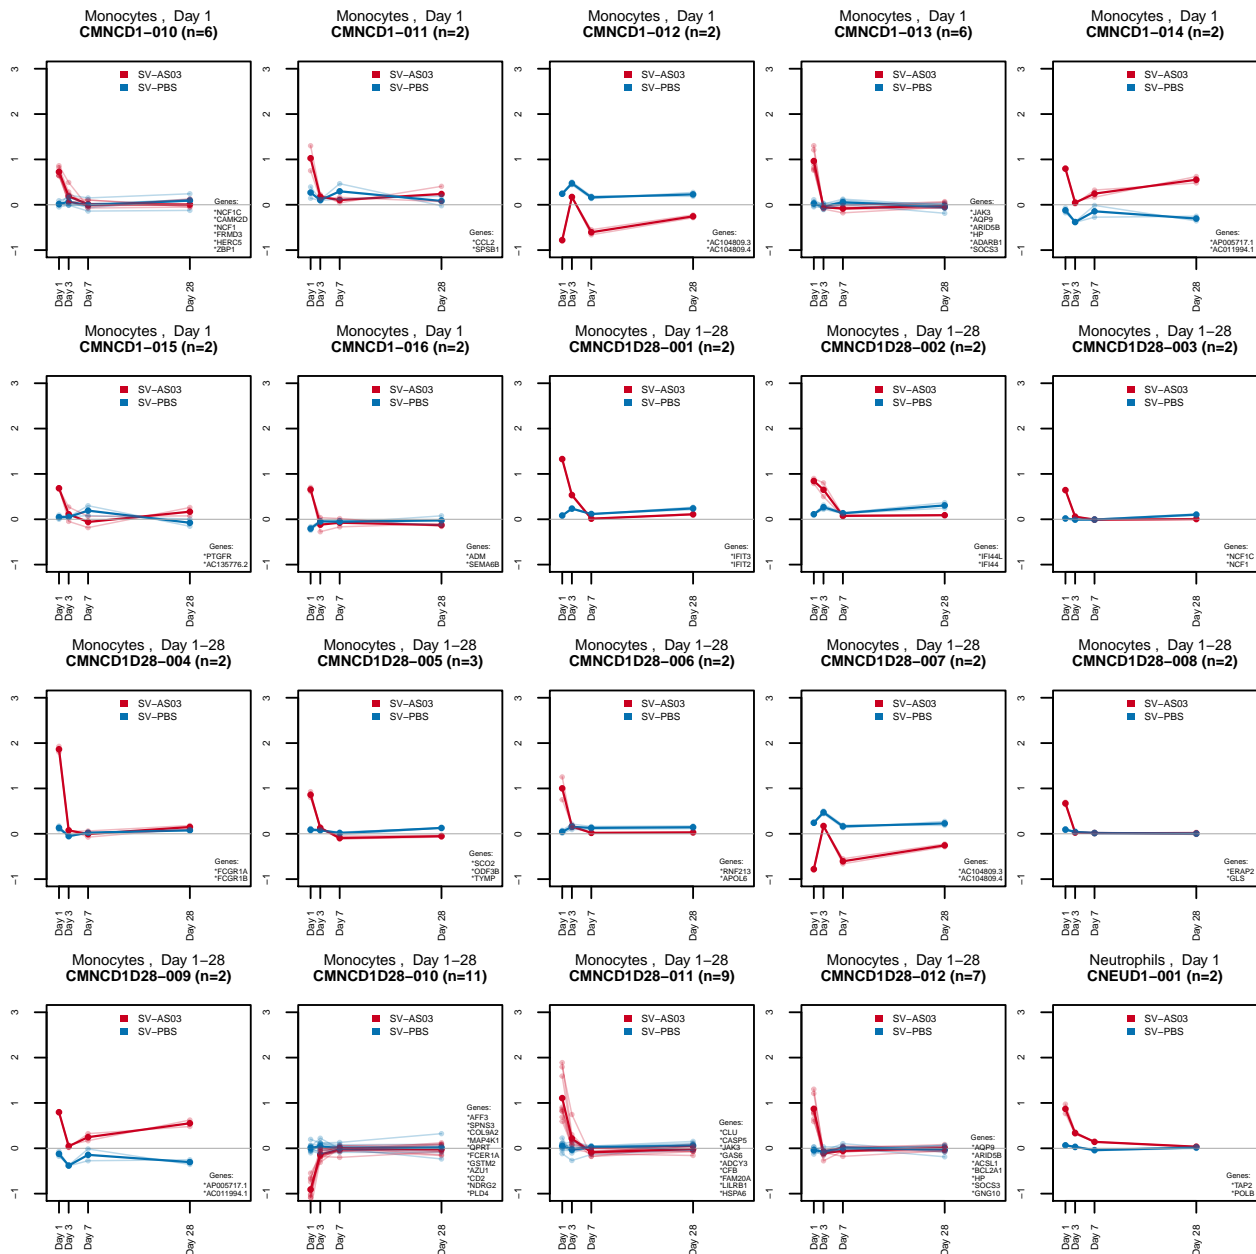

**Figure A102:** Gene cluster time trends of baseline log fold change by vaccine group (RNA-Seq, Monocytes and Neutrophils). Header indicates cluster ID. Mean log fold change across cluster genes is drawn in bold. Individual gene mean log fold changes are plotted in lighter colors. Asterisks indicate significantly differentially expressed genes for a given day.

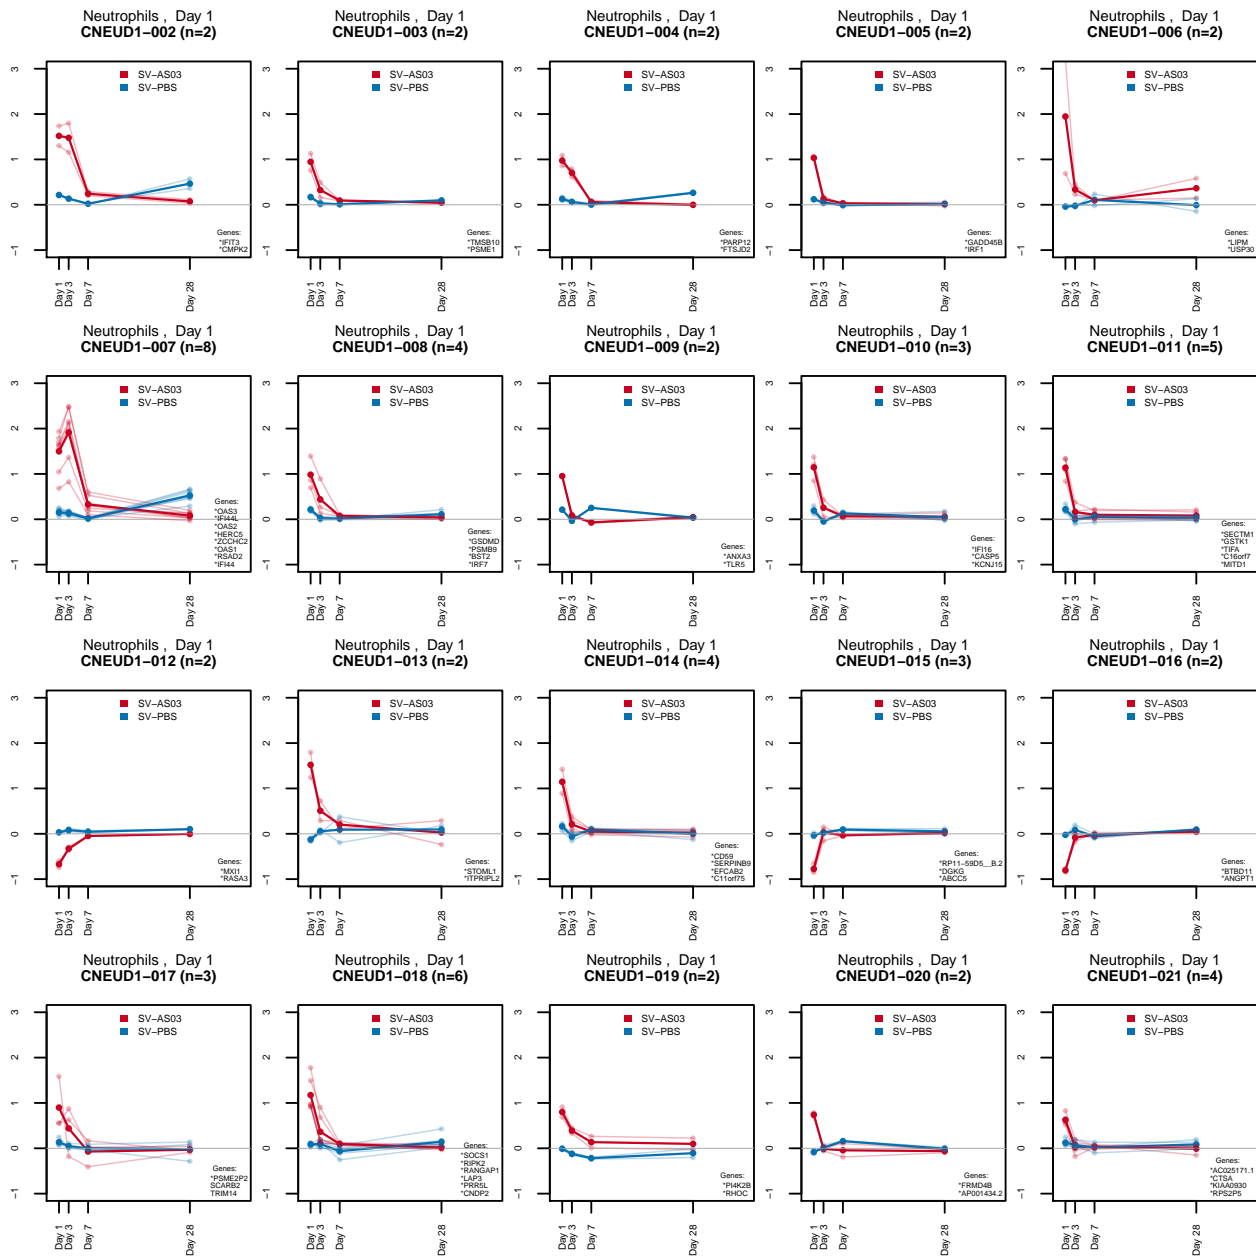

**Figure A103:** Gene cluster time trends of baseline log fold change by vaccine group (RNA-Seq, Neutrophils continued). Header indicates cluster ID. Mean log fold change across cluster genes is drawn in bold. Individual mean gene log fold changes are plotted in lighter colors. Asterisks indicate significantly differentially expressed genes for a given day.



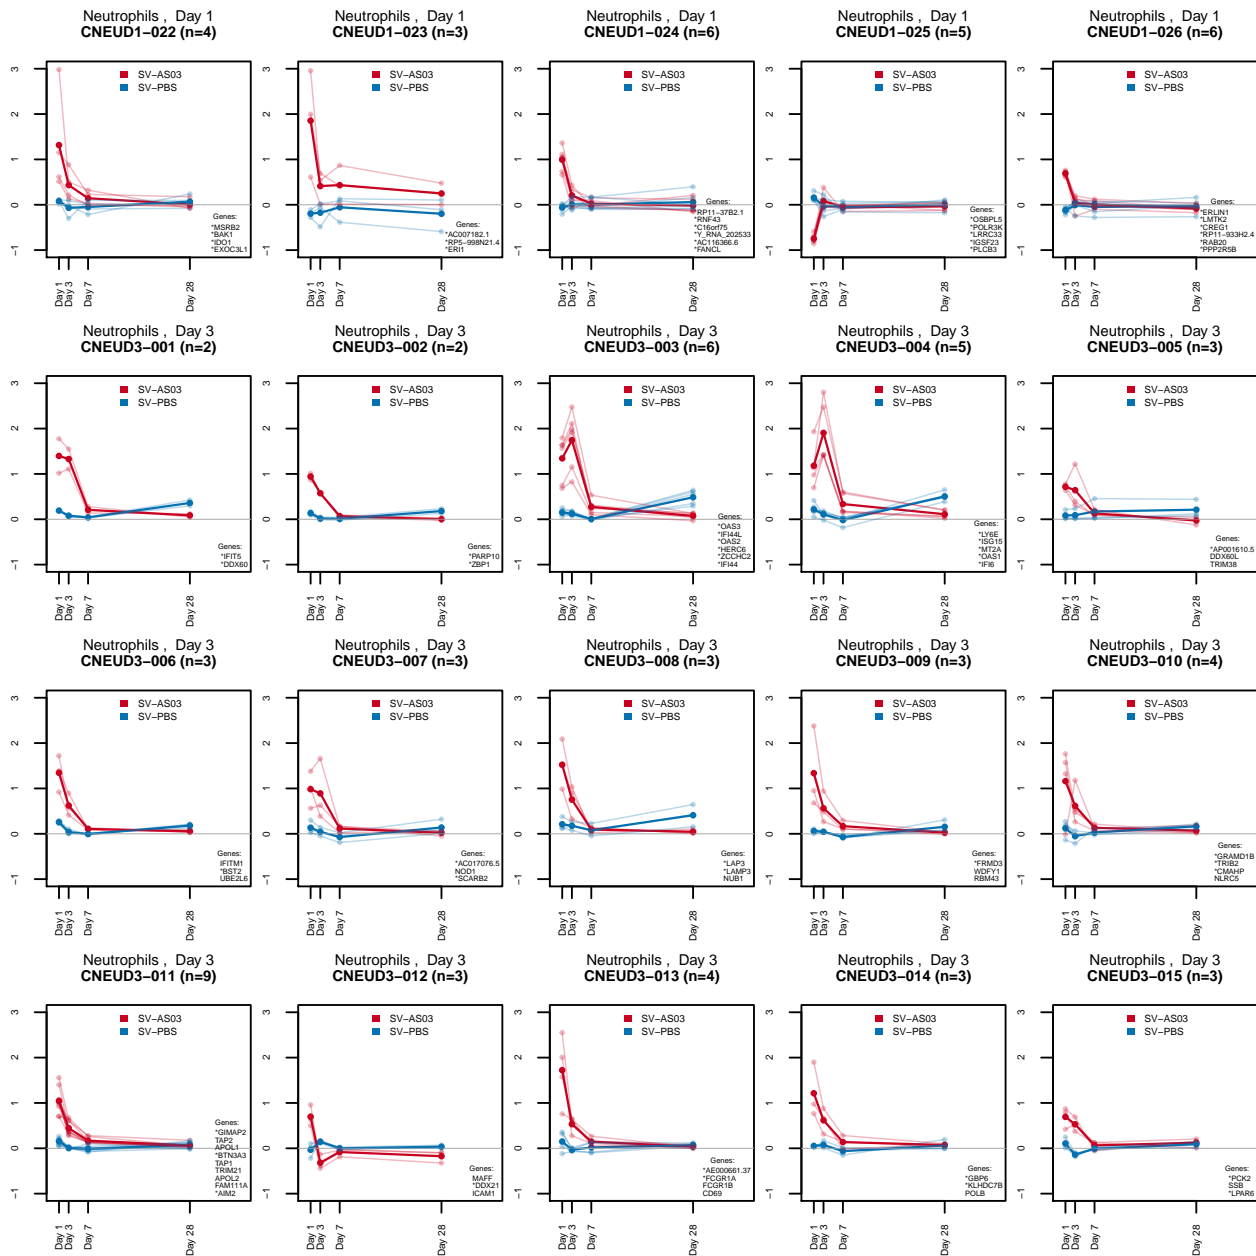

**Figure A104:** Gene cluster time trends of baseline log fold change by vaccine group (RNA-Seq, Neutrophils continued). Header indicates cluster ID. Mean log fold change across cluster genes is drawn in bold. Individual mean gene log fold changes are plotted in lighter colors. Asterisks indicate significantly differentially expressed genes for a given day.

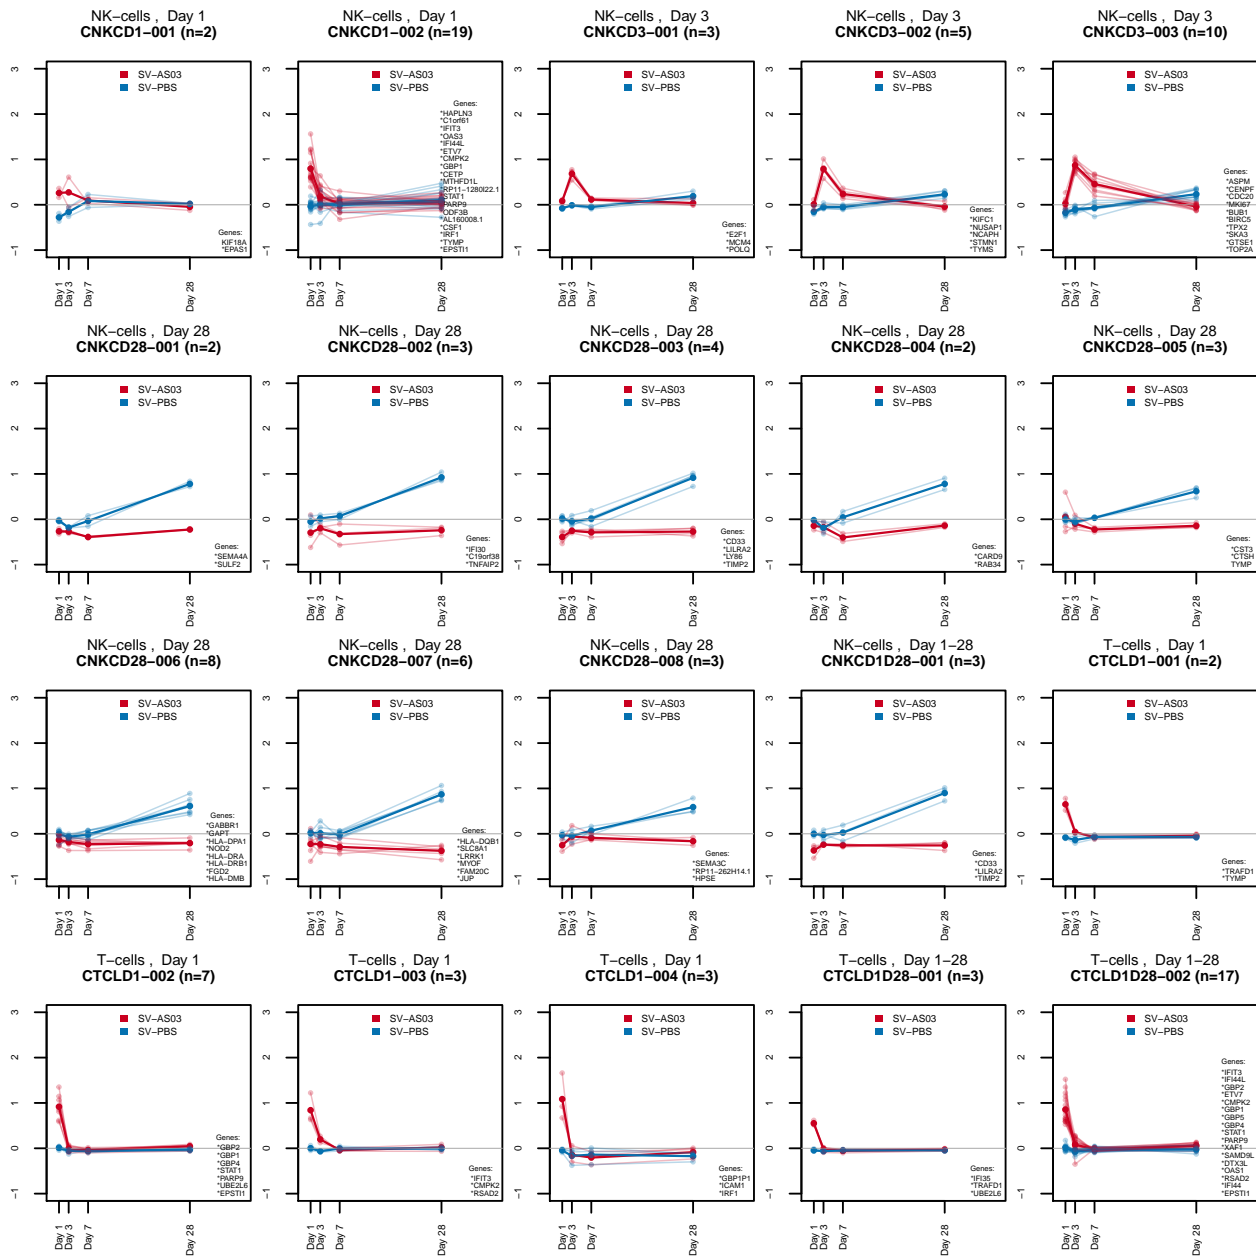

**Figure A105:** Gene cluster time trends of baseline log fold change by vaccine group (RNA-Seq, NK-cells and T-cells). Header indicates cluster ID. Mean log fold change across cluster genes is drawn in bold. Individual mean gene log fold changes are plotted in lighter colors. Asterisks indicate significantly differentially expressed genes for a given day.

**SV-AS03, Dendritic cells, Kegg Antigen Processing & Presentation**

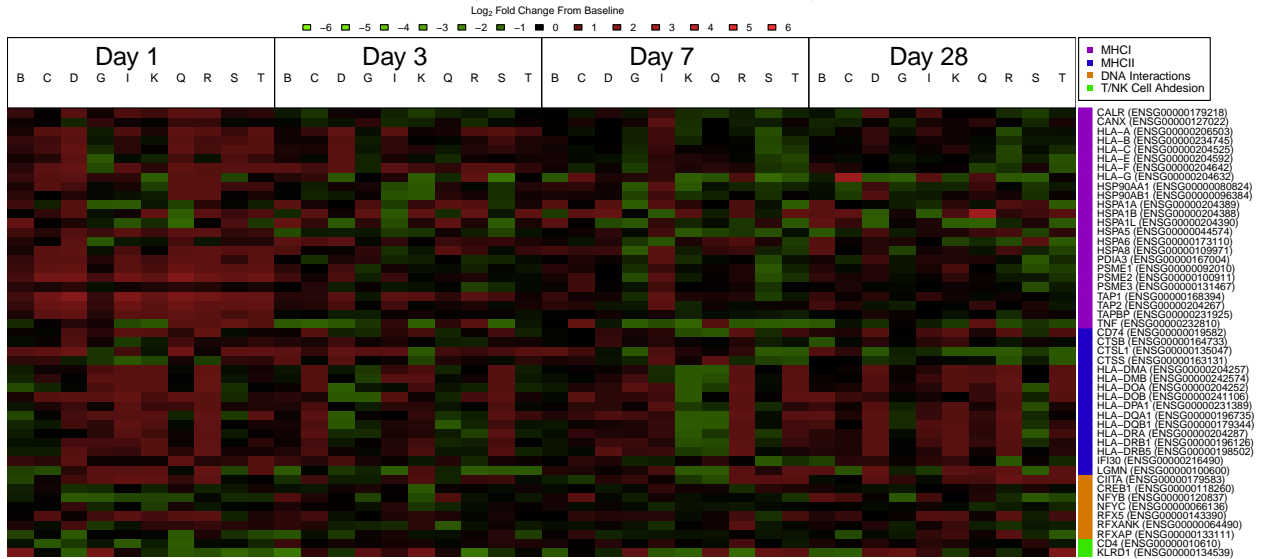

**SV-PBS, Dendritic cells, Kegg Antigen Processing & Presentation**

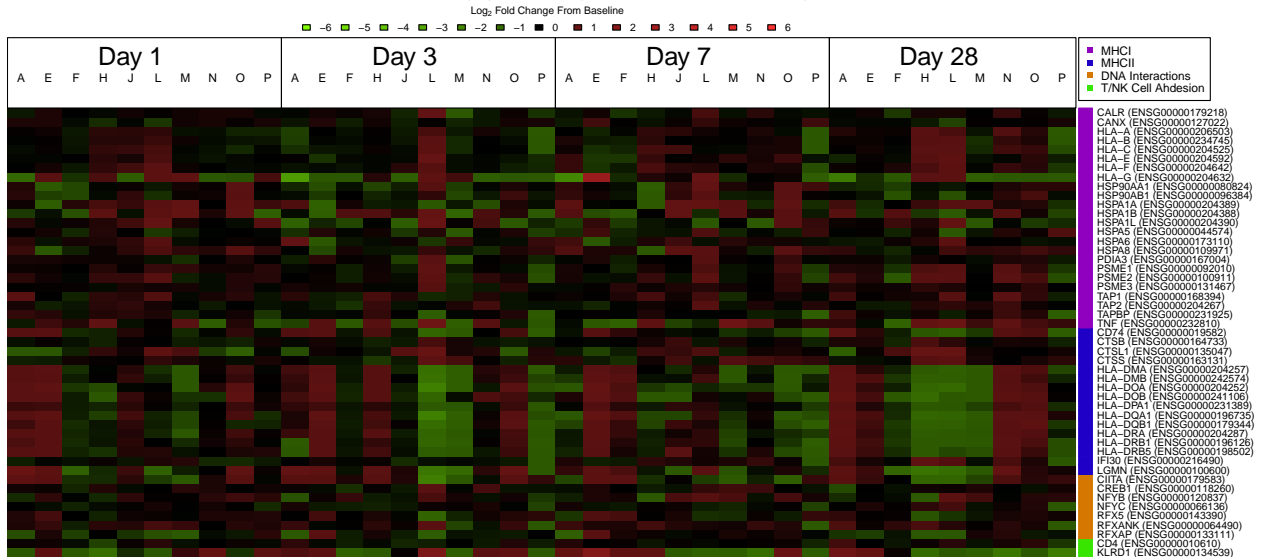

**Figure A106:** Heatmap of baseline log fold changes for known antigen presentation genes by vaccine group (RNA-Seq, Dendritic cells). Colored in red: up regulated from baseline; colored in green: down regulated from baseline. Genes were selected based on the KEGG antigen processing and presentation pathway.

### SV-AS03, Monocytes, Kegg Antigen Processing & Presentation

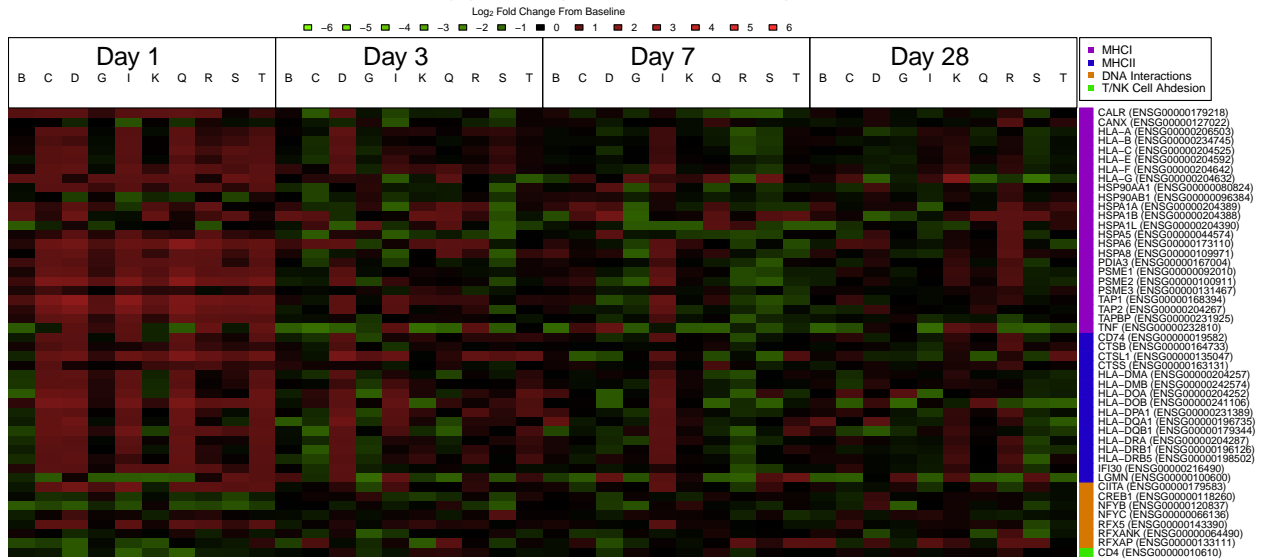

### SV-PBS, Monocytes, Kegg Antigen Processing & Presentation

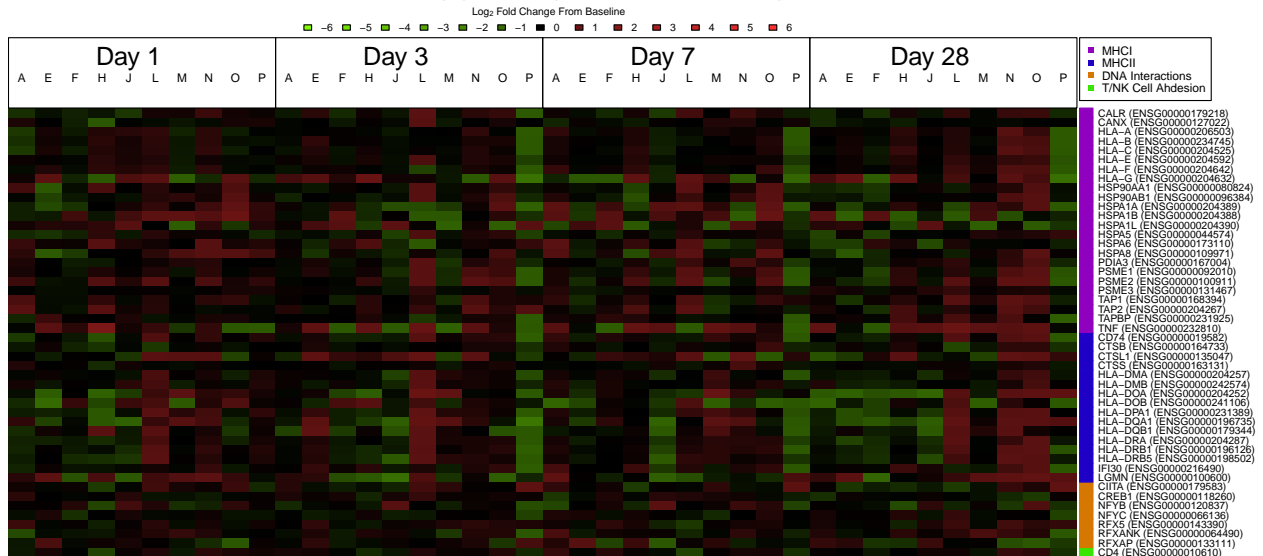

**Figure A107:** Heatmap of baseline log fold changes for known antigen presentation genes by vaccine group (RNA-Seq, Monocytes). Colored in red: up regulated from baseline; colored in green: down regulated from baseline. Genes were selected based on the KEGG antigen processing and presentation pathway.

### SV-AS03, Neutrophils, Kegg Antigen Processing & Presentation

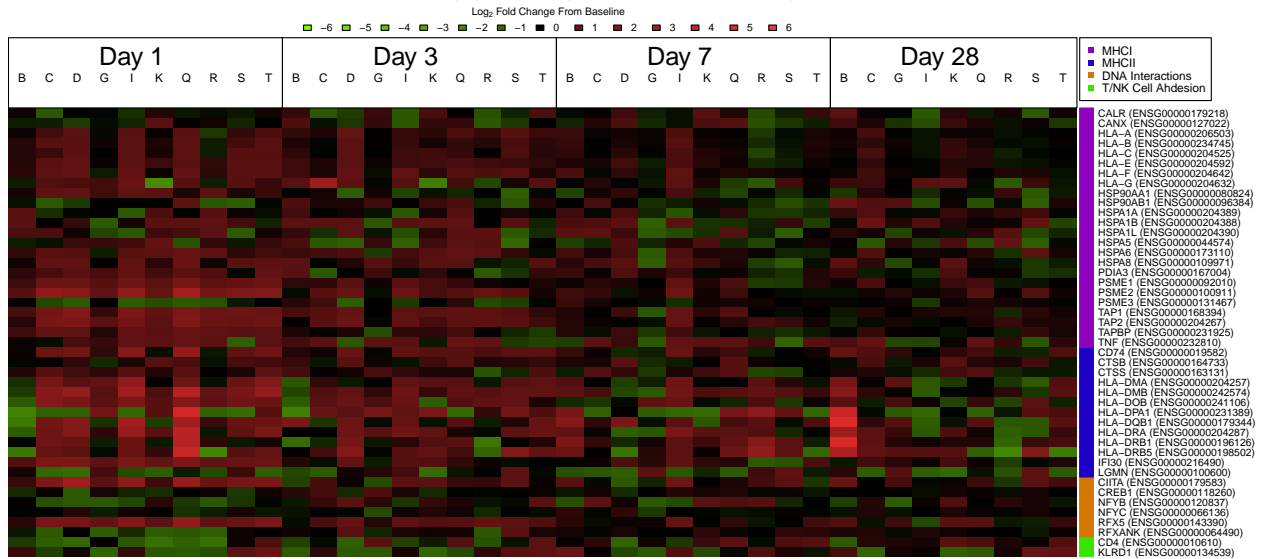

### SV-PBS, Neutrophils, Kegg Antigen Processing & Presentation

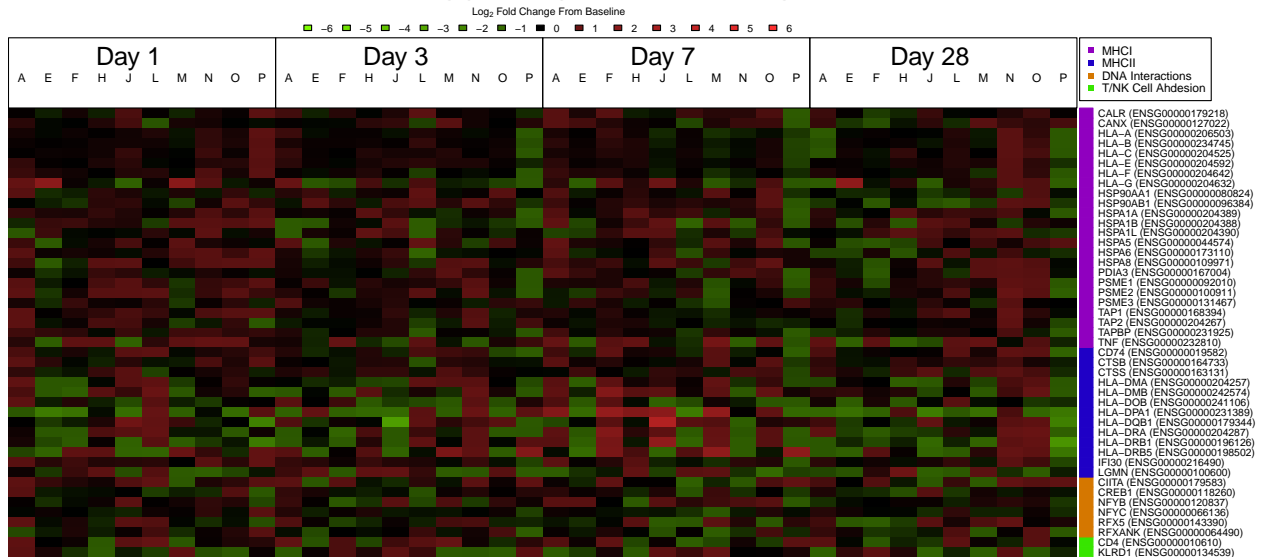

**Figure A108:** Heatmap of baseline log fold changes for known antigen presentation genes by vaccine group (RNA-Seq, Neutrophils). Colored in red: up regulated from baseline; colored in green: down regulated from baseline. Genes were selected based on the KEGG antigen processing and presentation pathway.

### SV-AS03, NK-cells, Kegg Antigen Processing & Presentation

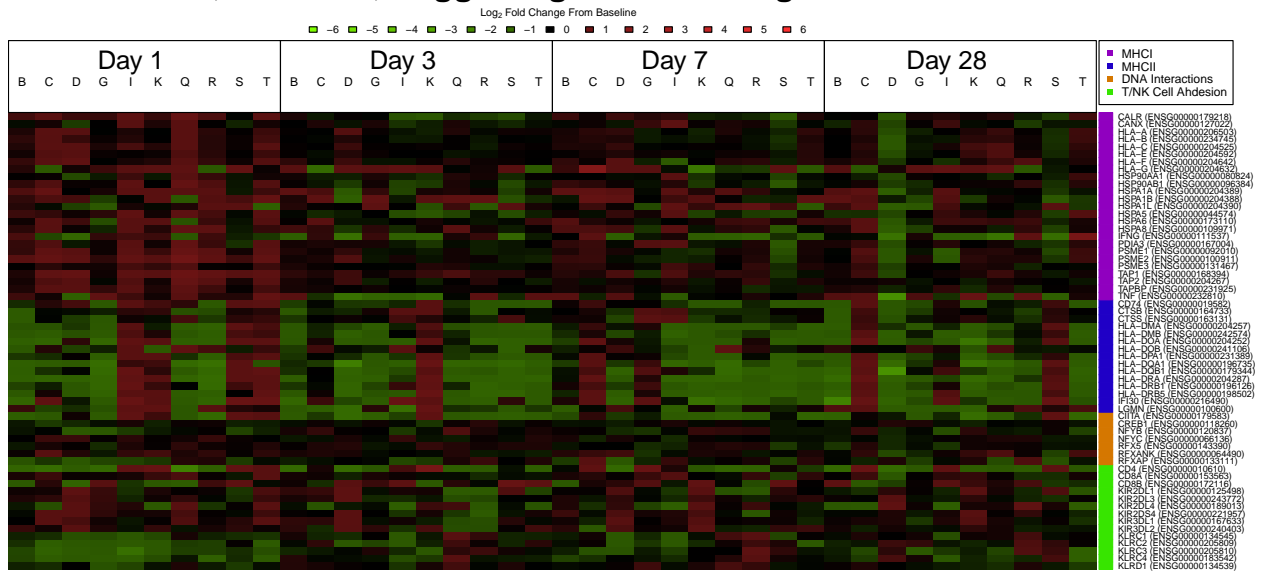

### SV-PBS, NK-cells, Kegg Antigen Processing & Presentation

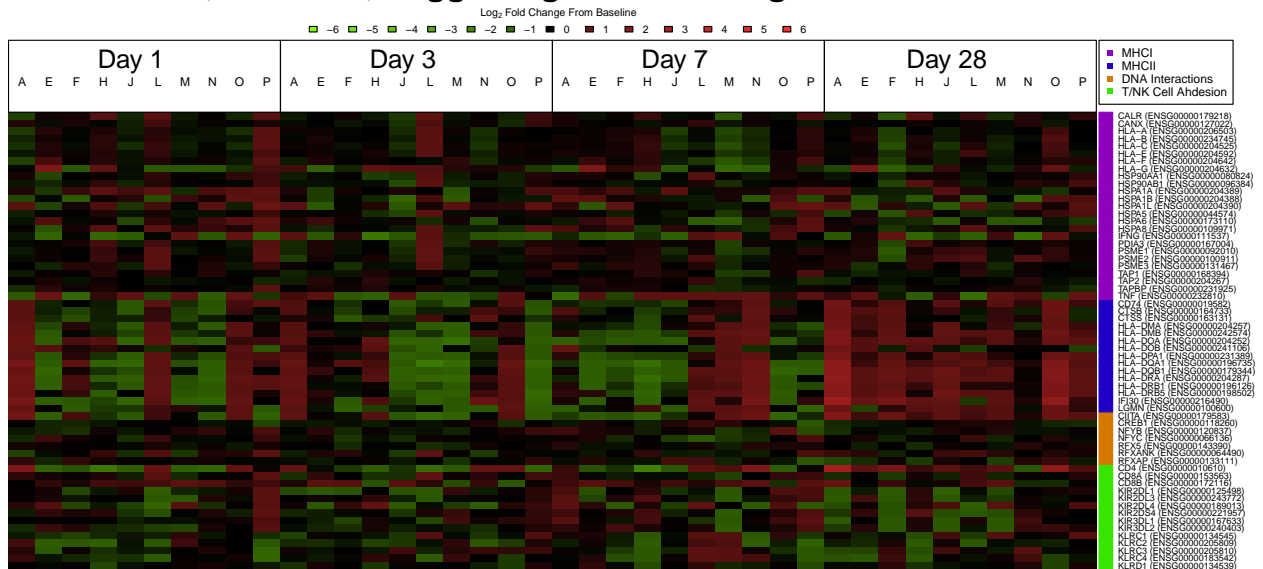

**Figure A109:** Heatmap of baseline log fold changes for known antigen presentation genes by vaccine group (RNA-Seq, NK-cells). Colored in red: up regulated from baseline; colored in green: down regulated from baseline. Genes were selected based on the KEGG antigen processing and presentation pathway.

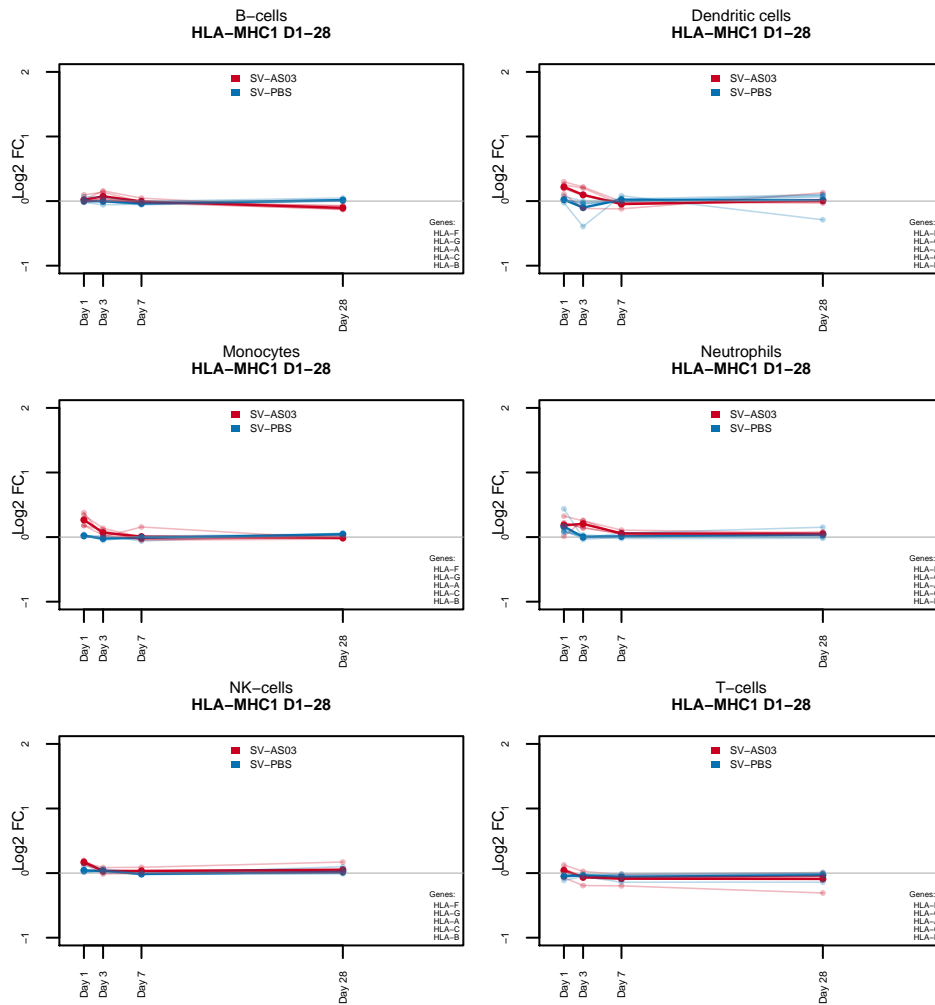

**Figure A110:** Time trends of baseline log fold change for MHC I genes by cell type and vaccine group (RNA-Seq). Mean log fold change across MHC I genes is drawn in bold. Individual gene mean log fold changes are plotted in lighter colors. Asterisks indicate that the gene was significantly differentially expressed for at least one of the post-vaccination days.

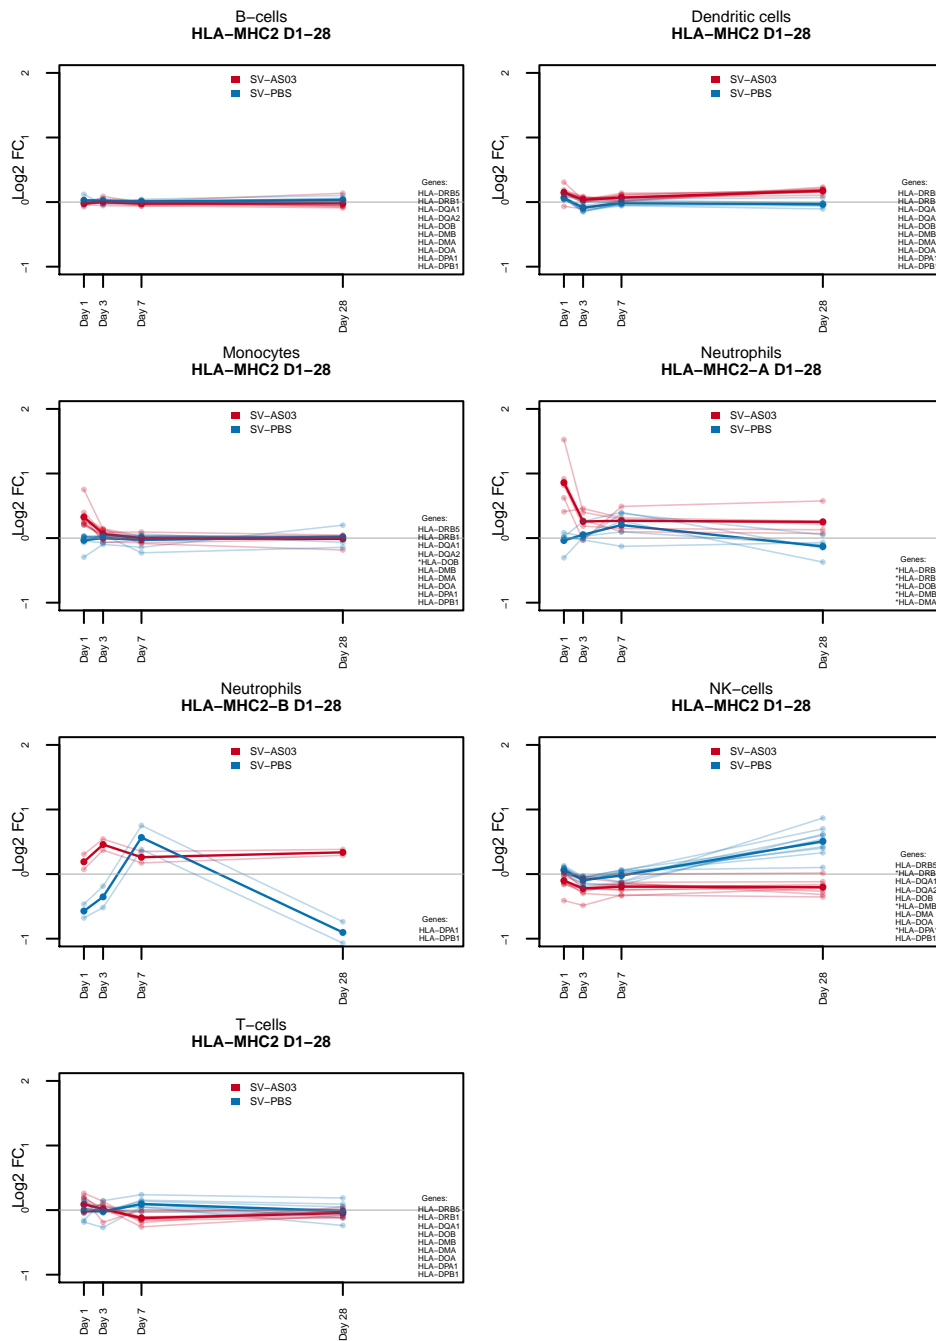

**Figure A111:** Time trends of baseline log fold change for MHC II genes by cell type and vaccine group (RNA-Seq). Mean log fold change across MHC II genes is drawn in bold. Individual gene mean log fold changes are plotted in lighter colors. Asterisks indicate that the gene was significantly differentially expressed for at least one of the post-vaccination days.



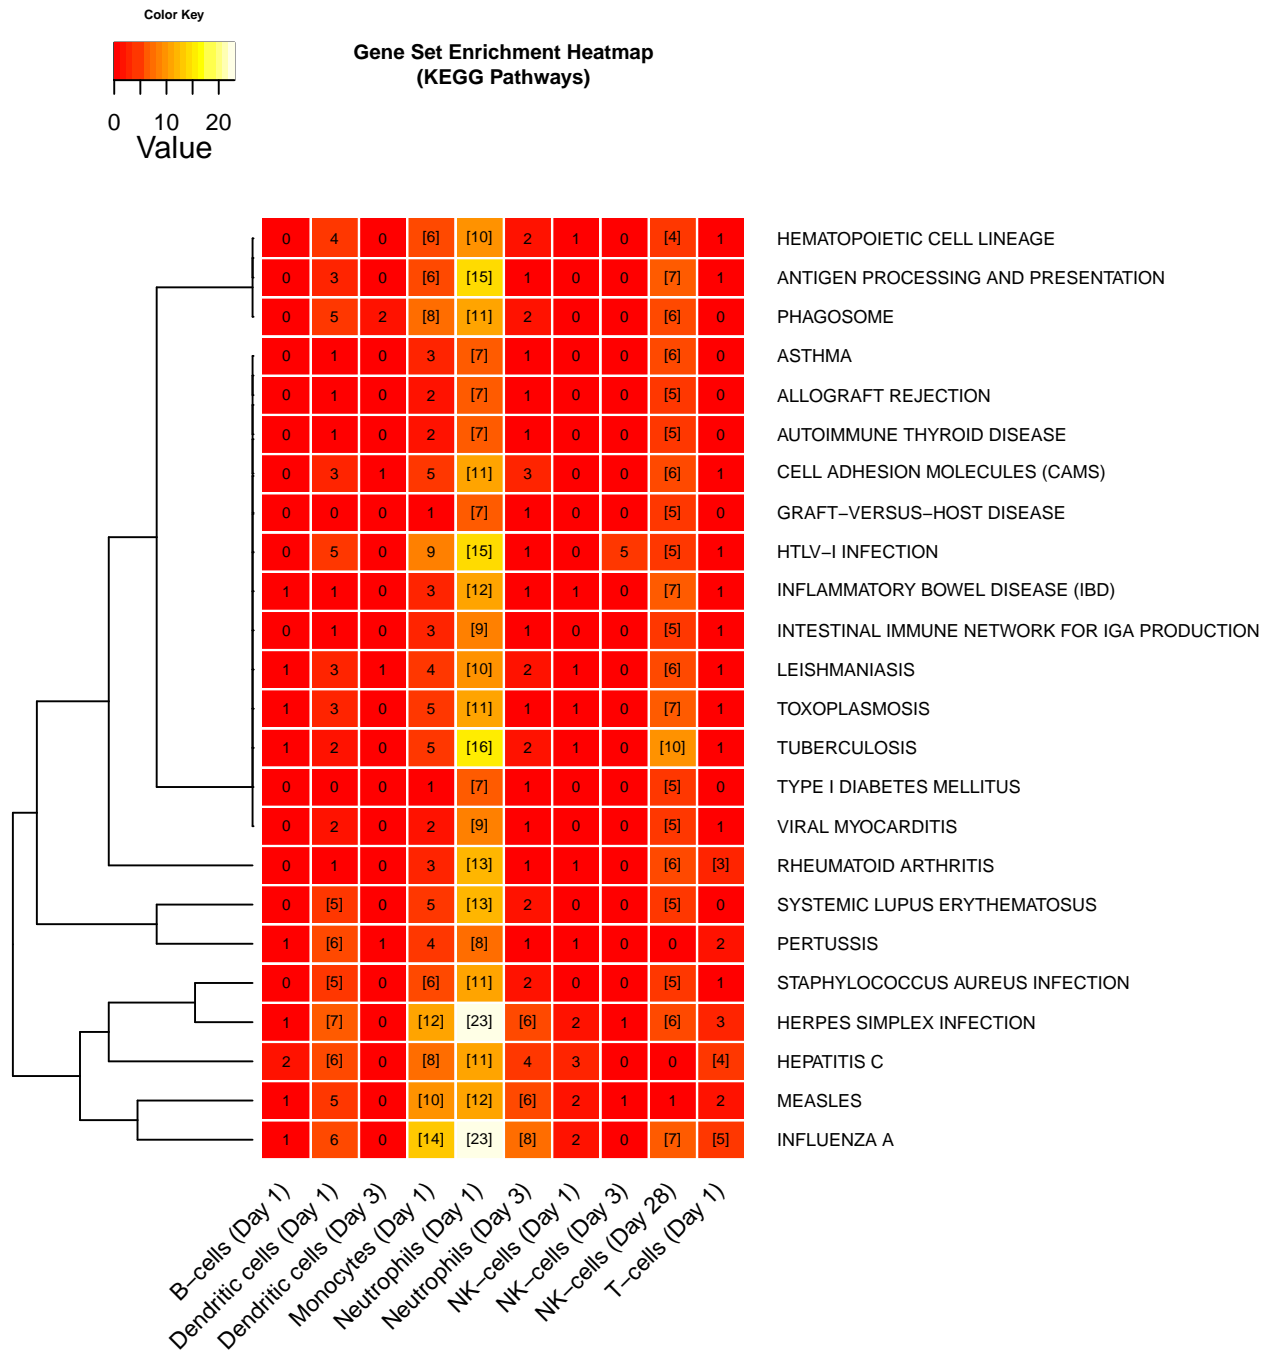

**Figure A112:** Heatmap of enriched KEGG Pathways (RNA-Seq). Gene sets significantly enriched in at least two conditions are shown. Cells are color-coded by the number of significant genes in a set. Cells with gene numbers in brackets indicate significantly enriched sets. Sets were clustered based on the Jaccard distance between their binary enrichment pattern.

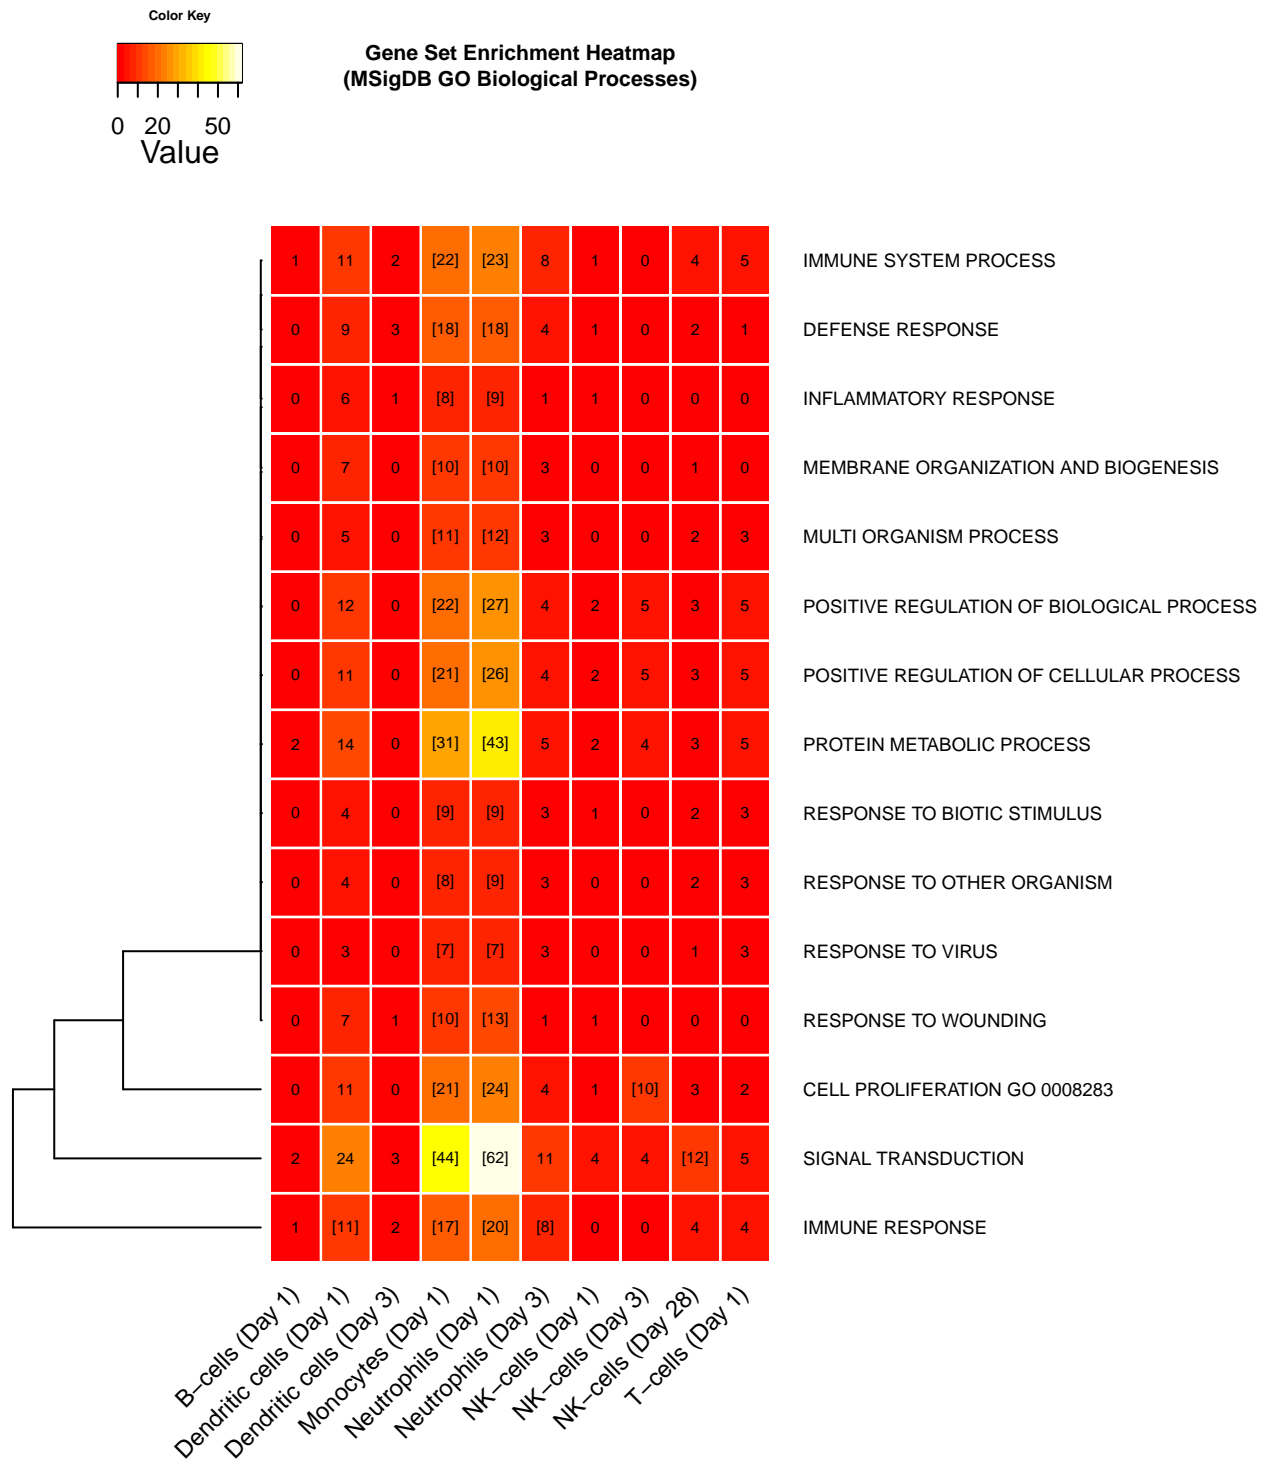

**Figure A113:** Heatmap of enriched MSigDB GO Biological Processes (RNA-Seq). Gene sets significantly enriched in at least two conditions are shown. Cells are color-coded by the number of significant genes in a set. Cells with gene numbers in brackets indicate significantly enriched sets. Sets were clustered based on the Jaccard distance between their binary enrichment pattern.

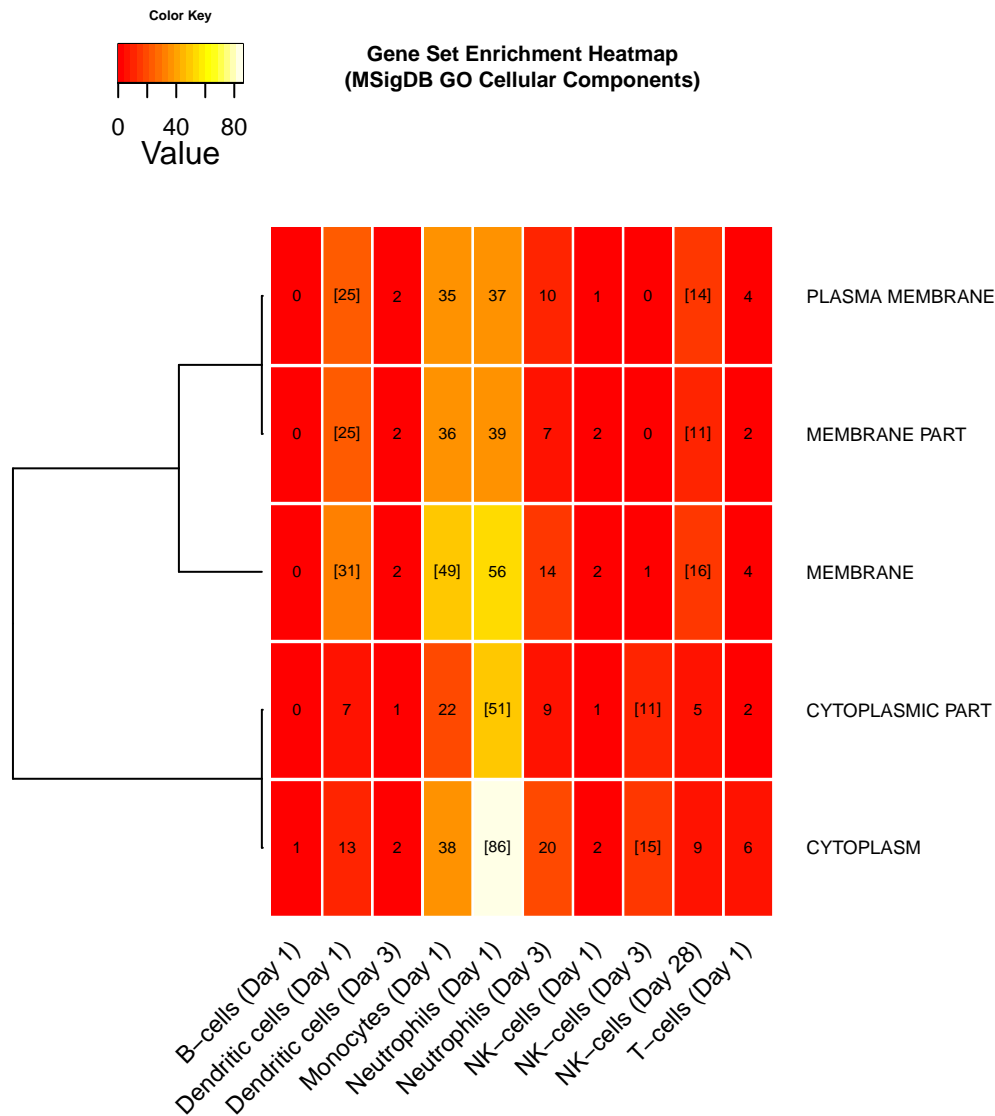

**Figure A114:** Heatmap of enriched MSigDB GO Cellular Components (RNA-Seq). Gene sets significantly enriched in at least two conditions are shown. Cells are color-coded by the number of significant genes in a set. Cells with gene numbers in brackets indicate significantly enriched sets. Sets were clustered based on the Jaccard distance between their binary enrichment pattern.

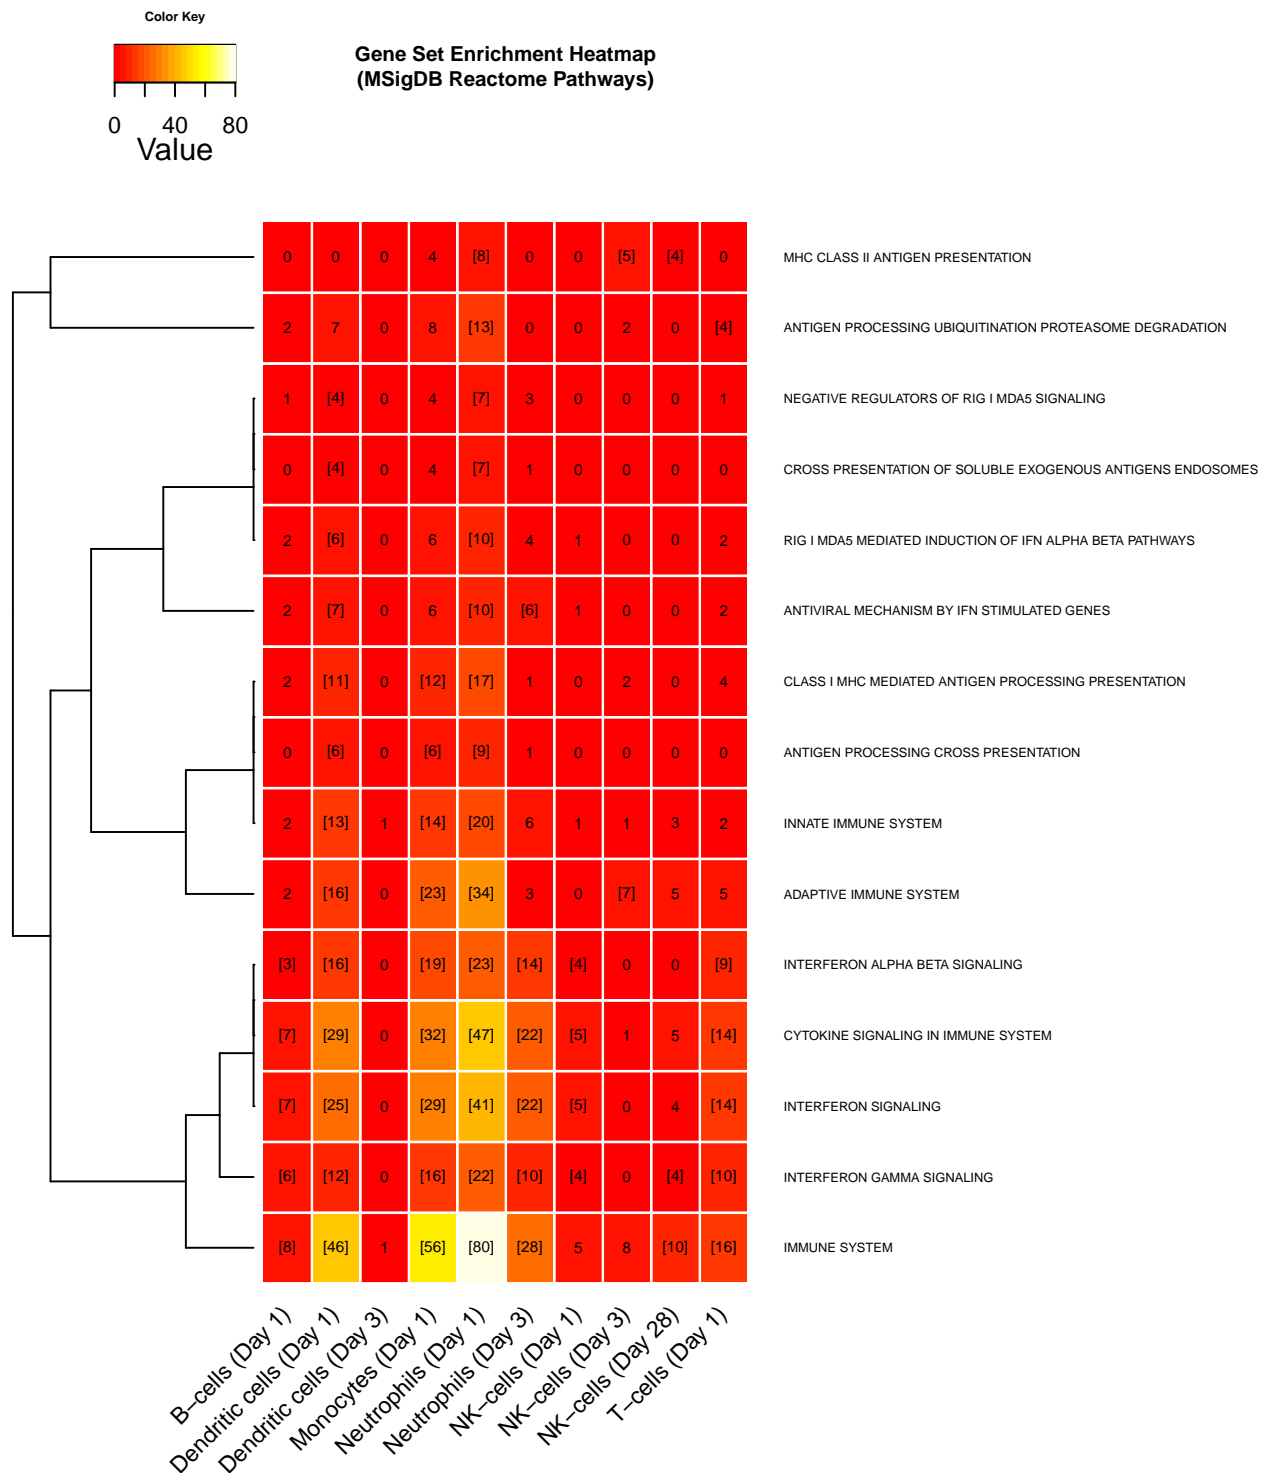

**Figure A115:** Heatmap of enriched MSigDB Reactome Pathways (RNA-Seq). Gene sets significantly enriched in at least two conditions are shown. Cells are color-coded by the number of significant genes in a set. Cells with gene numbers in brackets indicate significantly enriched sets. Sets were clustered based on the Jaccard distance between their binary enrichment pattern.

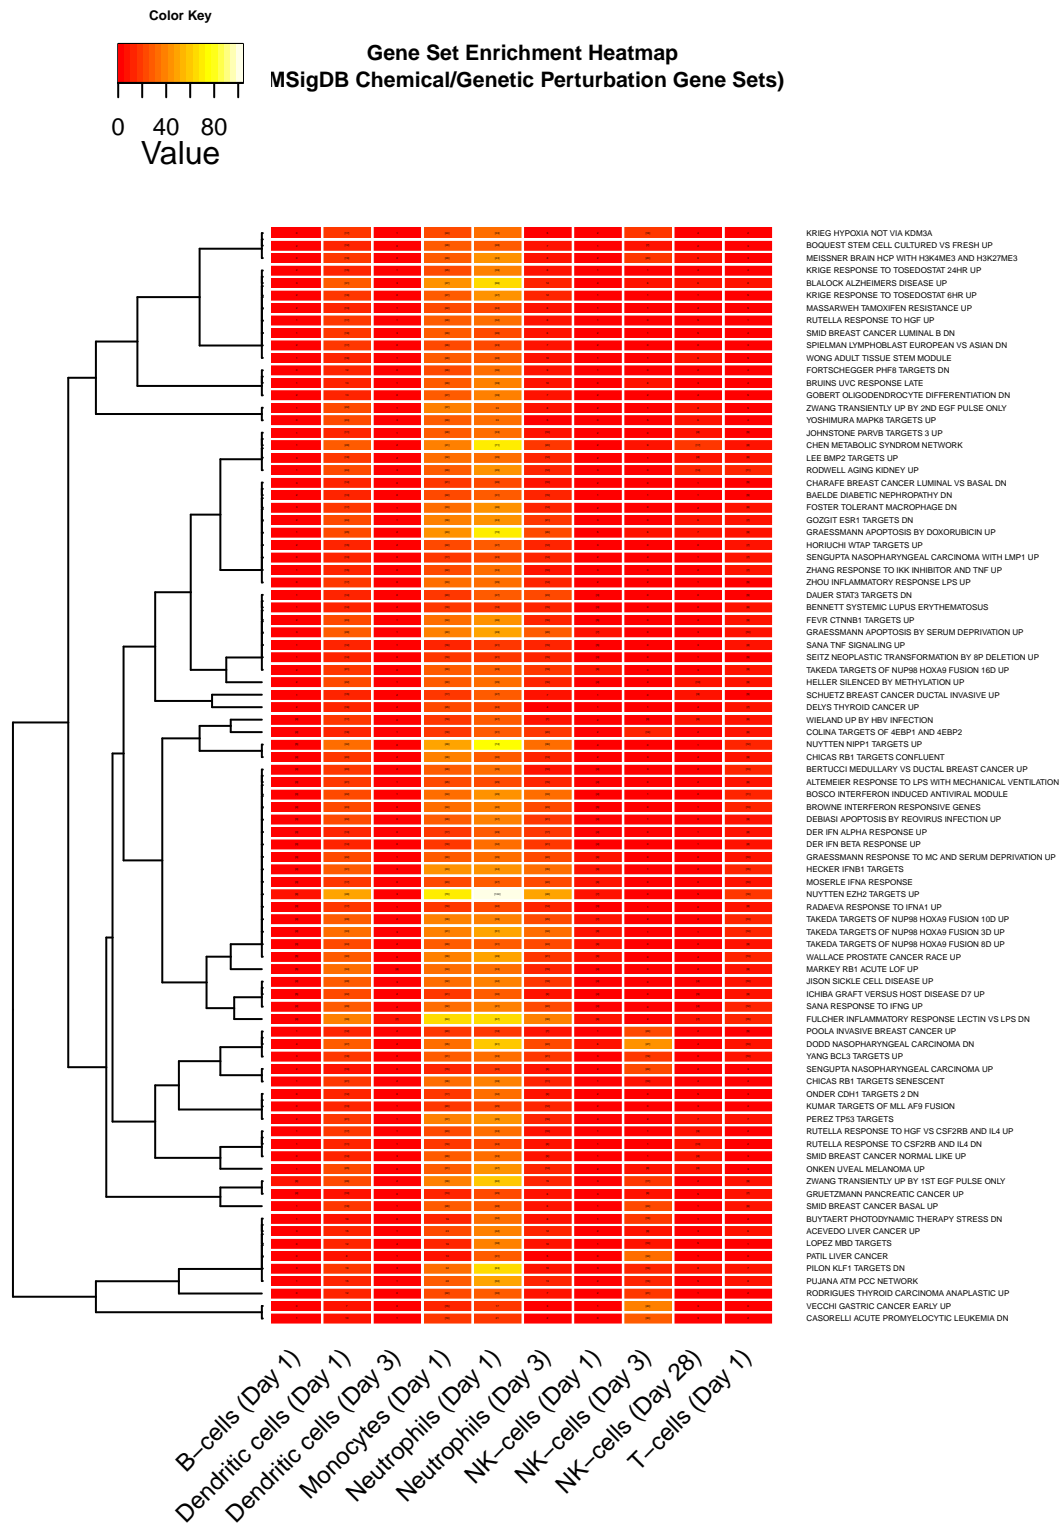

**Figure A116:** Heatmap of enriched MSigDB Chemical/Genetic Perturbation gene sets (RNA-Seq). Gene sets significantly enriched in at least two conditions are shown. Cells are color-coded by the number of significant genes in a set. Cells with gene numbers in brackets indicate significantly enriched sets. Sets were clustered based on the Jaccard distance between their binary enrichment pattern. Gene sets were further filtered to only include sets whose sum of gene counts across conditions exceeded the 75% quantile of all sets.

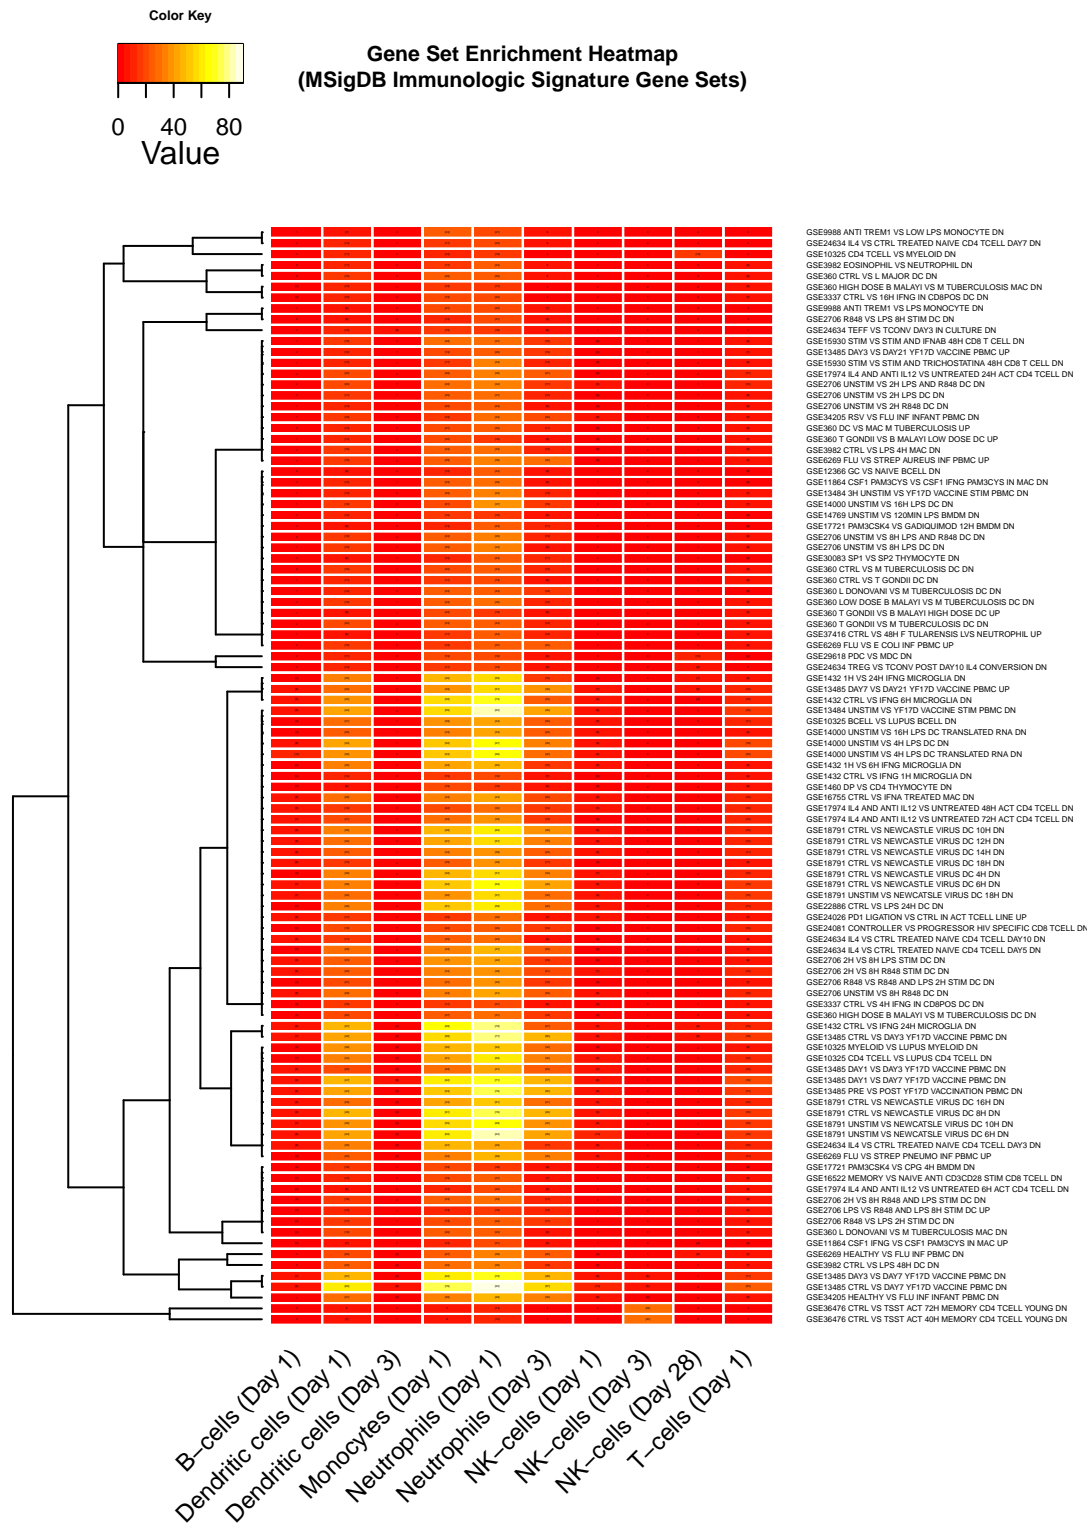

**Figure A117:** Heatmap of enriched MSigDB Immunologic Signature gene sets (RNA-Seq). Gene sets significantly enriched in at least two conditions are shown. Cells are color-coded by the number of significant genes in a set. Cells with gene numbers in brackets indicate significantly enriched sets. Sets were clustered based on the Jaccard distance between their binary enrichment pattern. Gene sets were further filtered to only include sets whose sum of gene counts across conditions exceeded the 75% quantile of all sets.

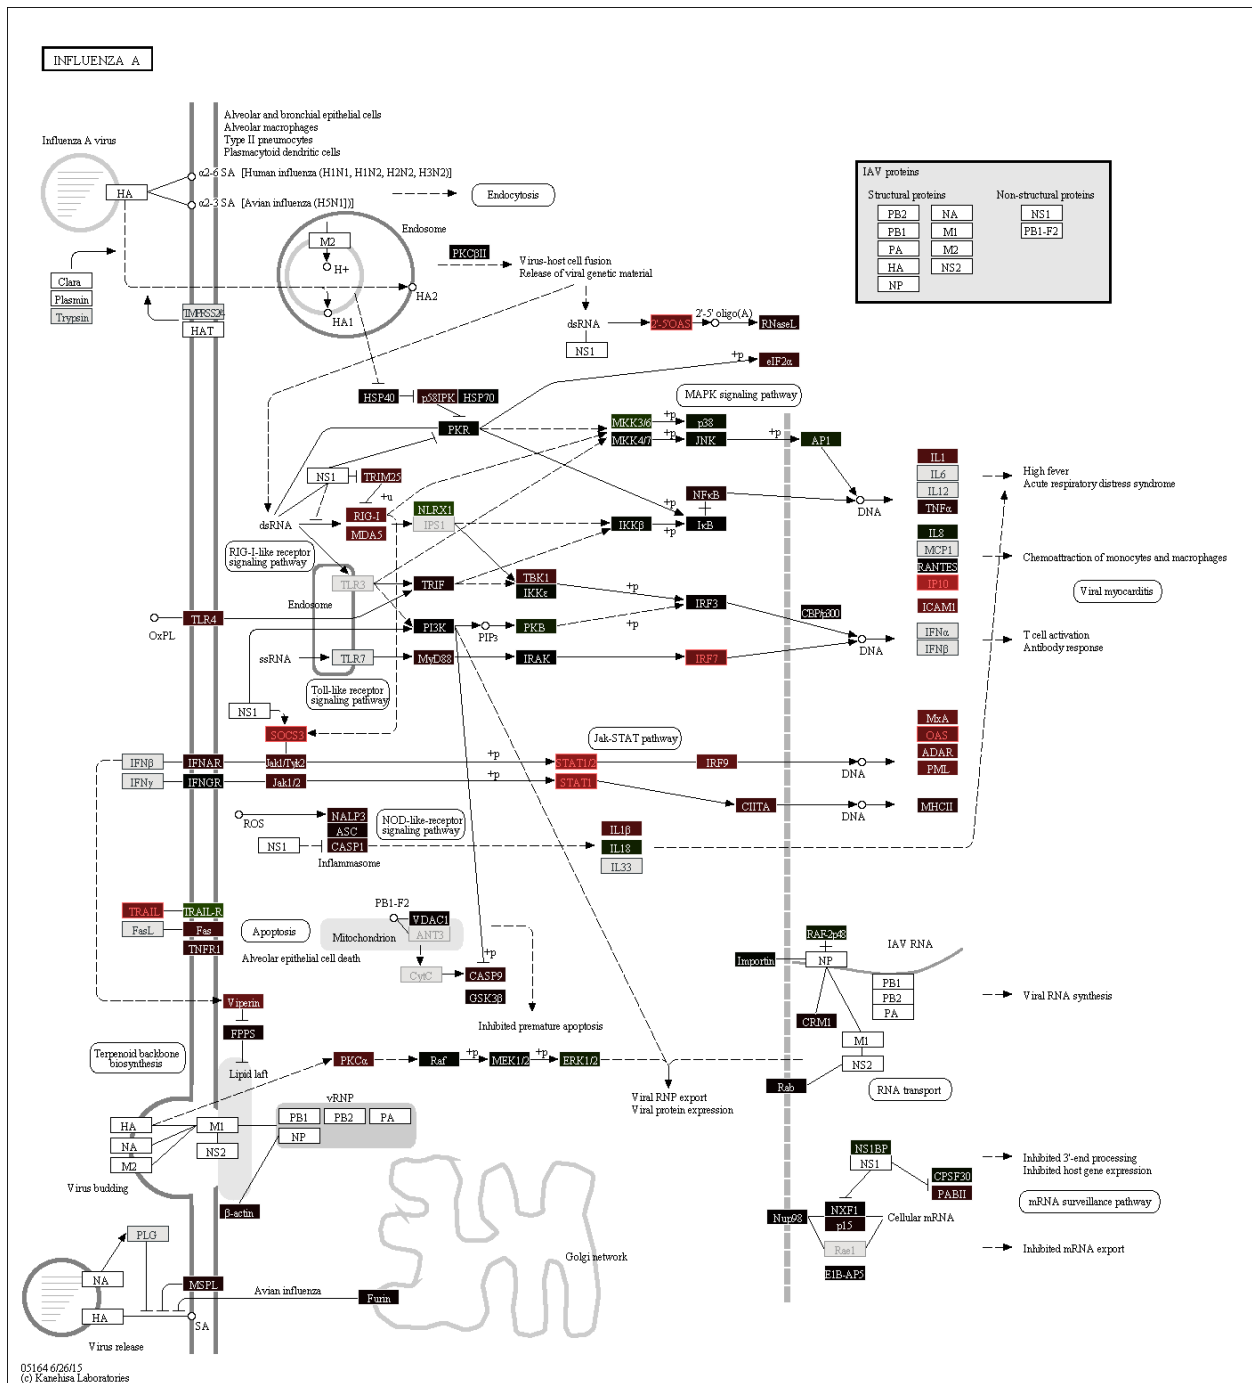

**Figure A118: KEGG Pathway Map - Influenza A (RNA-Seq, Dendritic cells, Day 1).** Node color gradient encodes fold change between vaccine groups (for multi-gene nodes the median fold change is used). In red: increased log fold change response for the SV-AS03 group relative to the SV-PBS group, in green: decreased log fold change response for the SV-AS03 group relative to the SV-PBS group, and vice versa, in black: fold change close to 1, in dark grey: genes filtered out due to low overall expression, light grey: gene missing database mapping, white: non-human gene. Statistically significant fold changes are highlighted using red and green label colors.

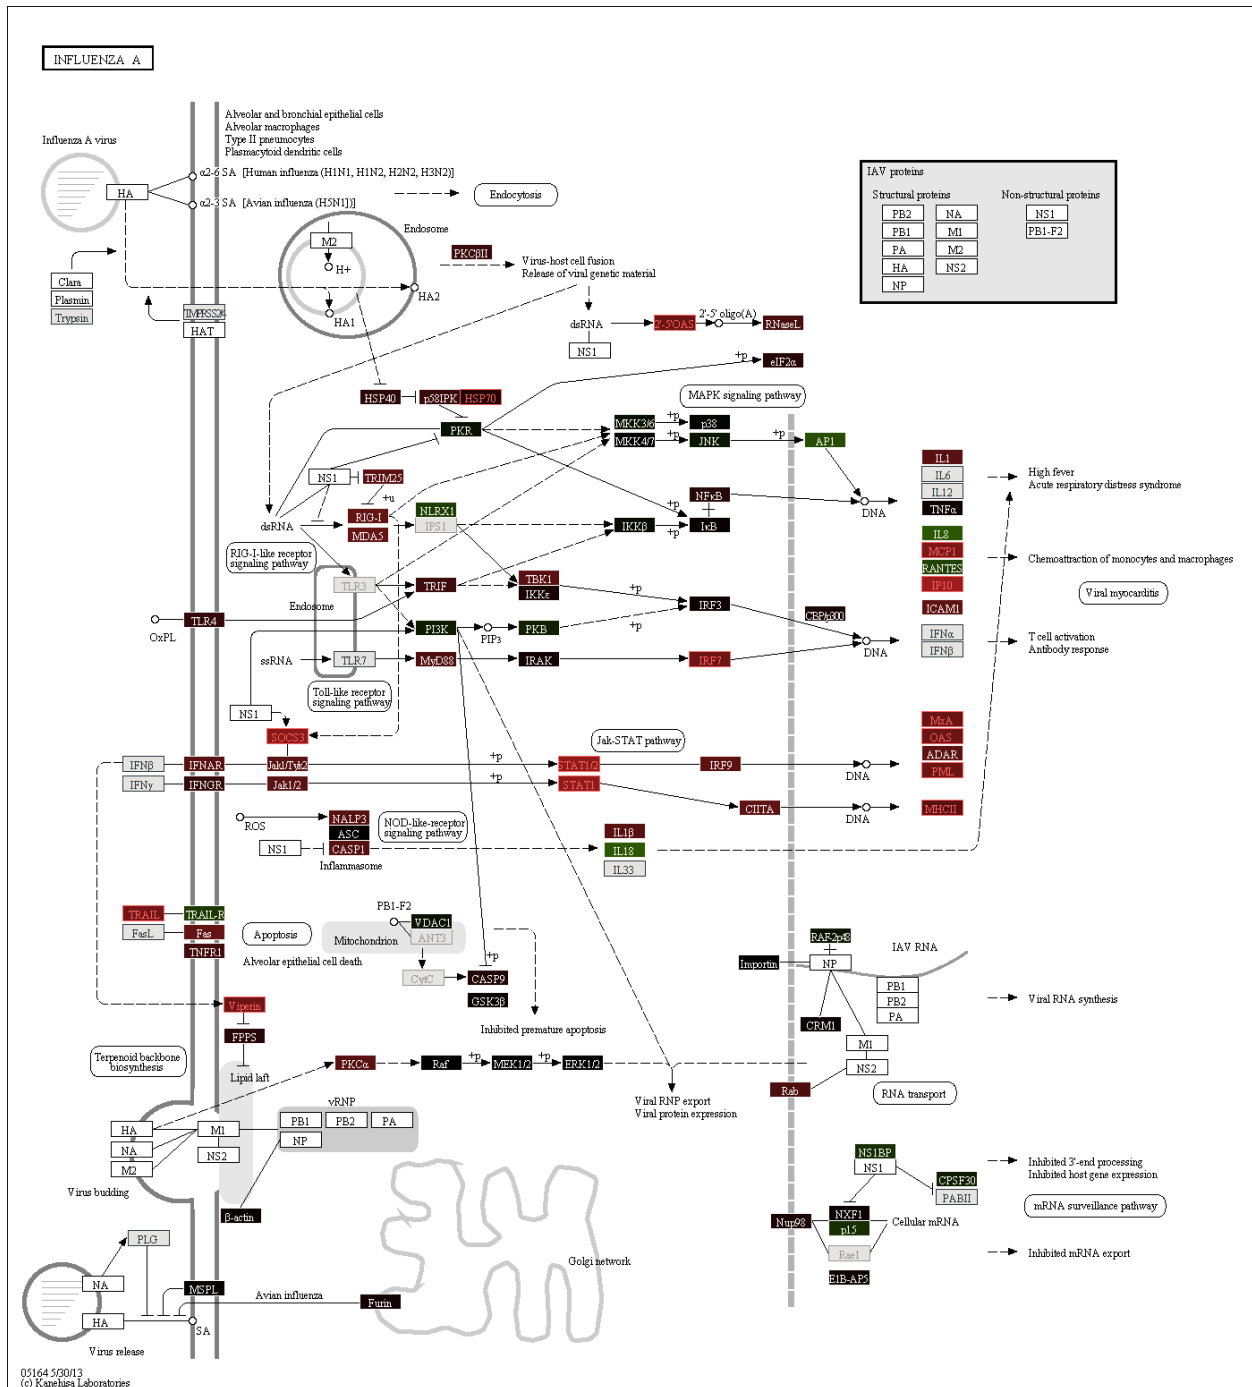

**Figure A119: KEGG Pathway Map - Influenza A (RNA-Seq, Monocytes, Day 1).** Node color gradient encodes fold change between vaccine groups (for multi-gene nodes the median fold change is used). In red: increased log fold change response for the SV-AS03 group relative to the SV-PBS group, in green: decreased log fold change response for the SV-AS03 group relative to the SV-PBS group, and vice versa, in black: fold change close to 1, in dark grey: genes filtered out due to low overall expression, light grey: gene missing database mapping, white: non-human gene. Statistically significant fold changes are highlighted using red and green label colors.



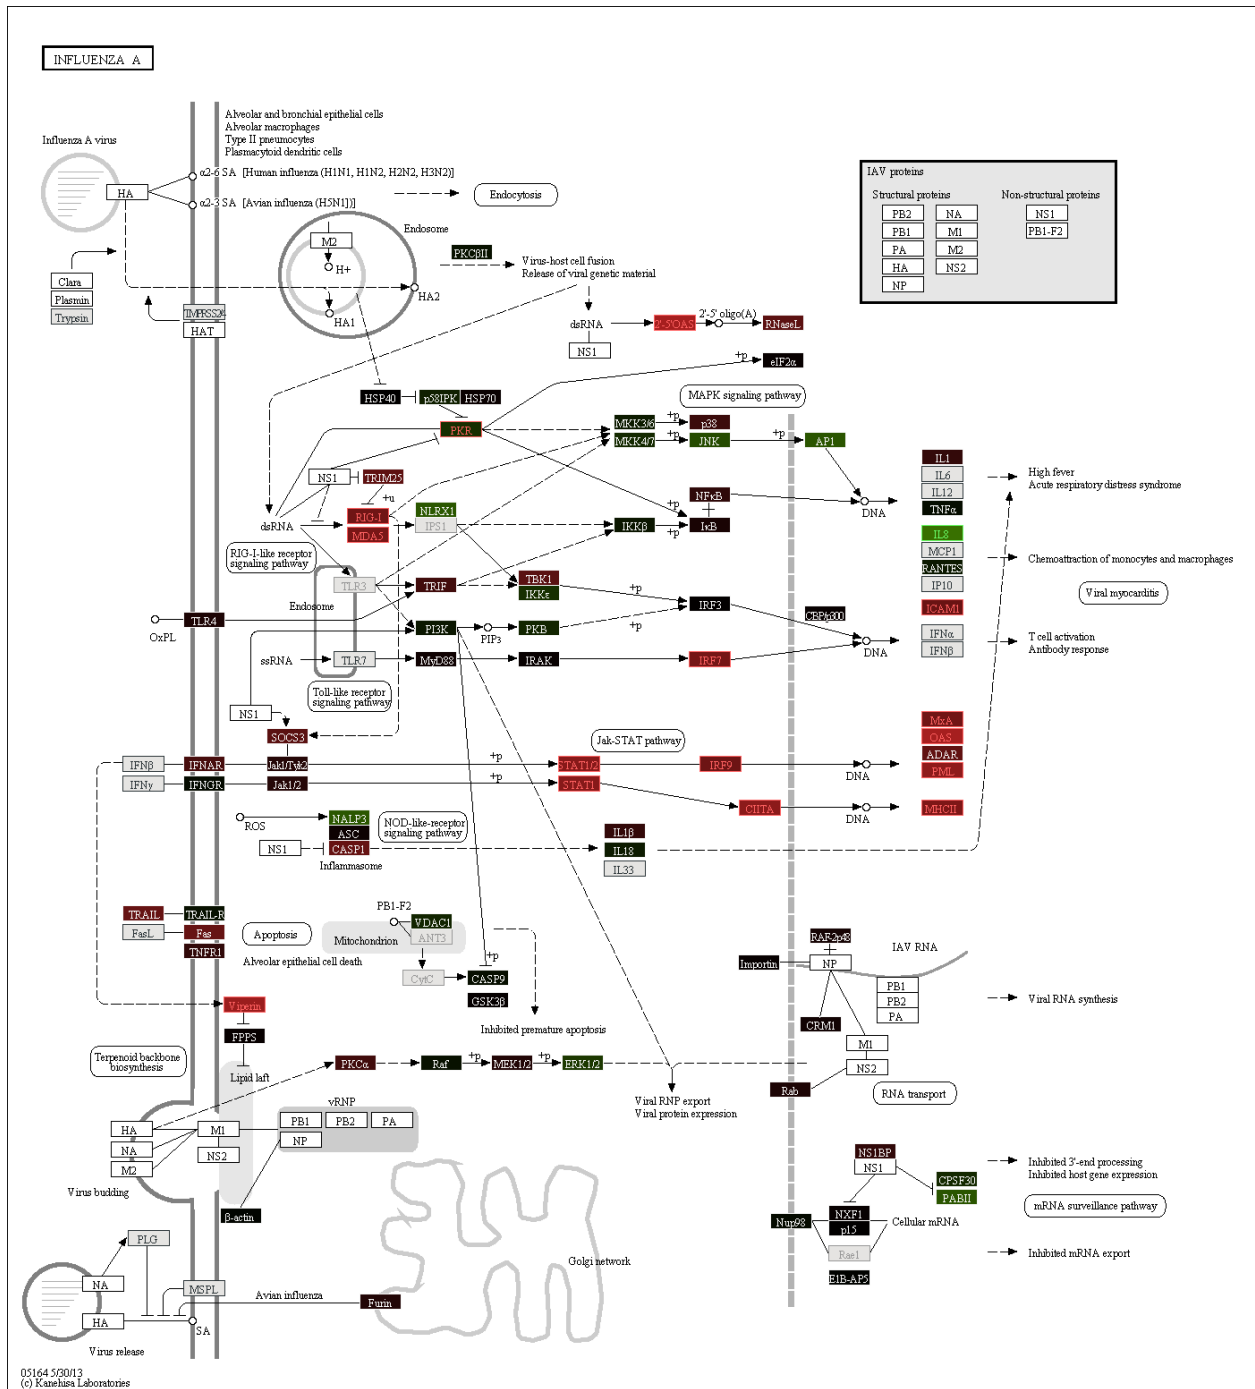

**Figure A120:** KEGG Pathway Map - Influenza A (RNA-Seq, Neutrophils, Day 1). Node color gradient encodes fold change between vaccine groups (for multi-gene nodes the median fold change is used). In red: increased log fold change response for the SV-AS03 group relative to the SV-PBS group, in green: decreased log fold change response for the SV-AS03 group relative to the SV-PBS group, and vice versa, in black: fold change close to 1, in dark grey: genes filtered out due to low overall expression, light grey: gene missing database mapping, white: non-human gene. Statistically significant fold changes are highlighted using red and green label colors.

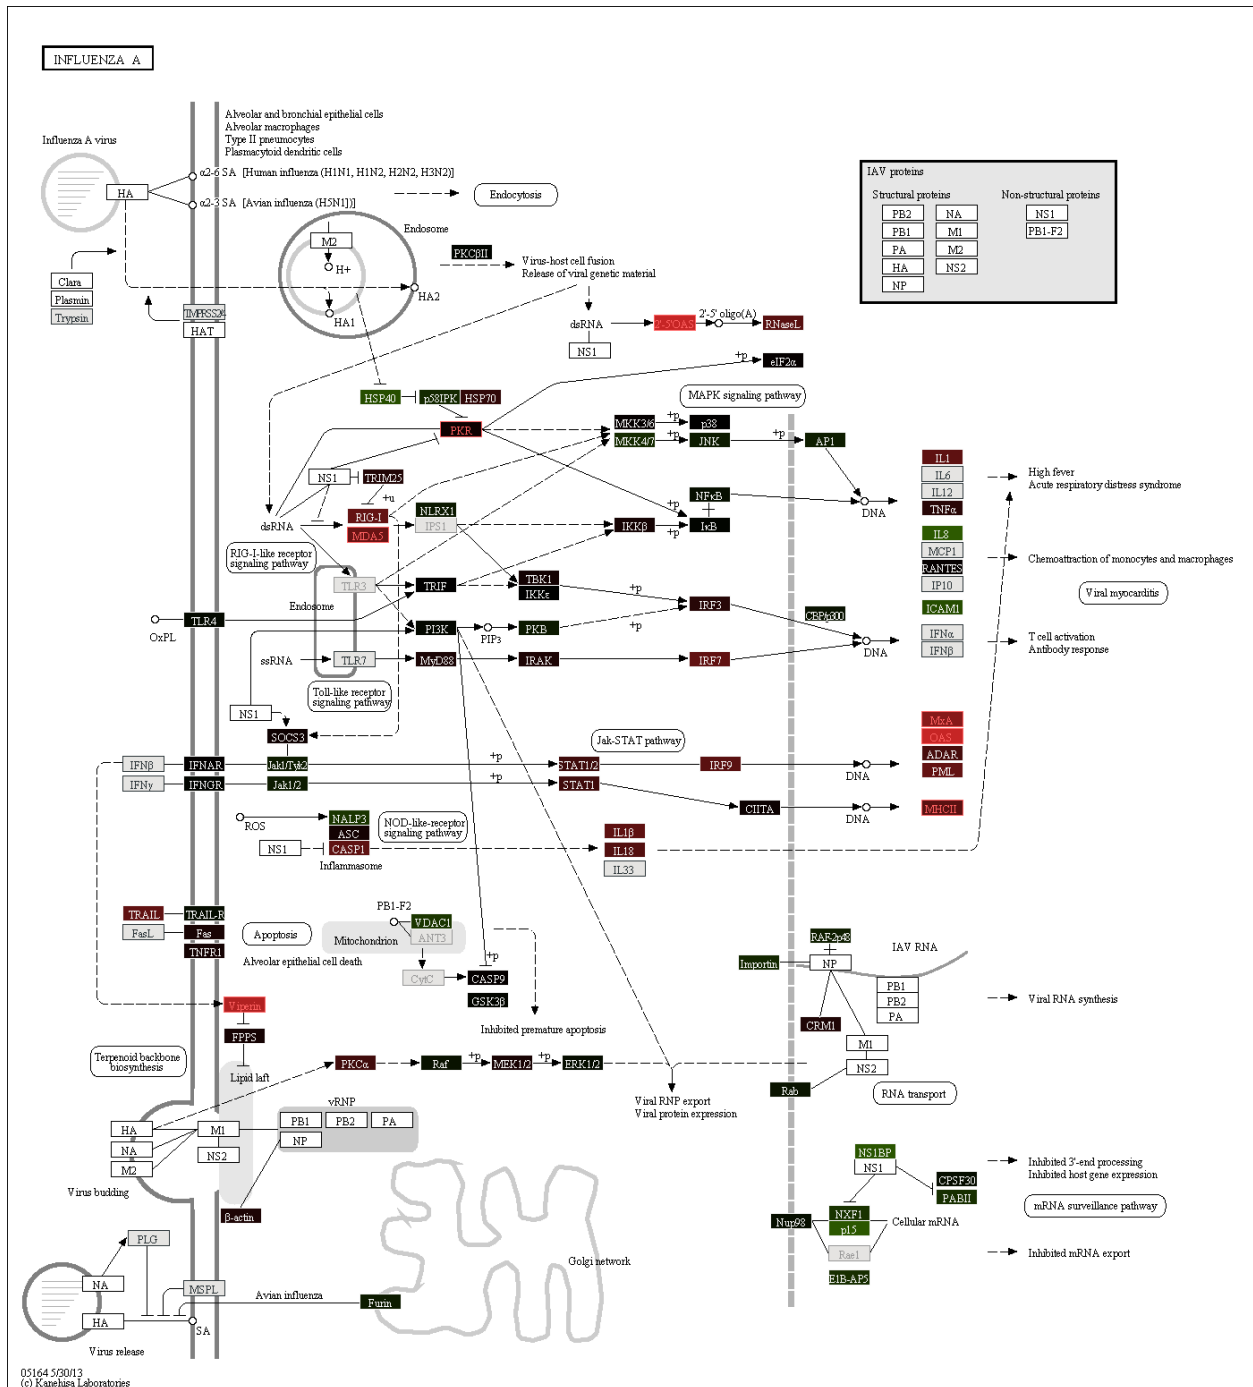

**Figure A121: KEGG Pathway Map - Influenza A (RNA-Seq, Neutrophils, Day 3).** Node color gradient encodes fold change between vaccine groups (for multi-gene nodes the median fold change is used). In red: increased log fold change response for the SV-AS03 group relative to the SV-PBS group, in green: decreased log fold change response for the SV-AS03 group relative to the SV-PBS group, and vice versa, in black: fold change close to 1, in dark grey: genes filtered out due to low overall expression, light grey: gene missing database mapping, white: non-human gene. Statistically significant fold changes are highlighted using red and green label colors.

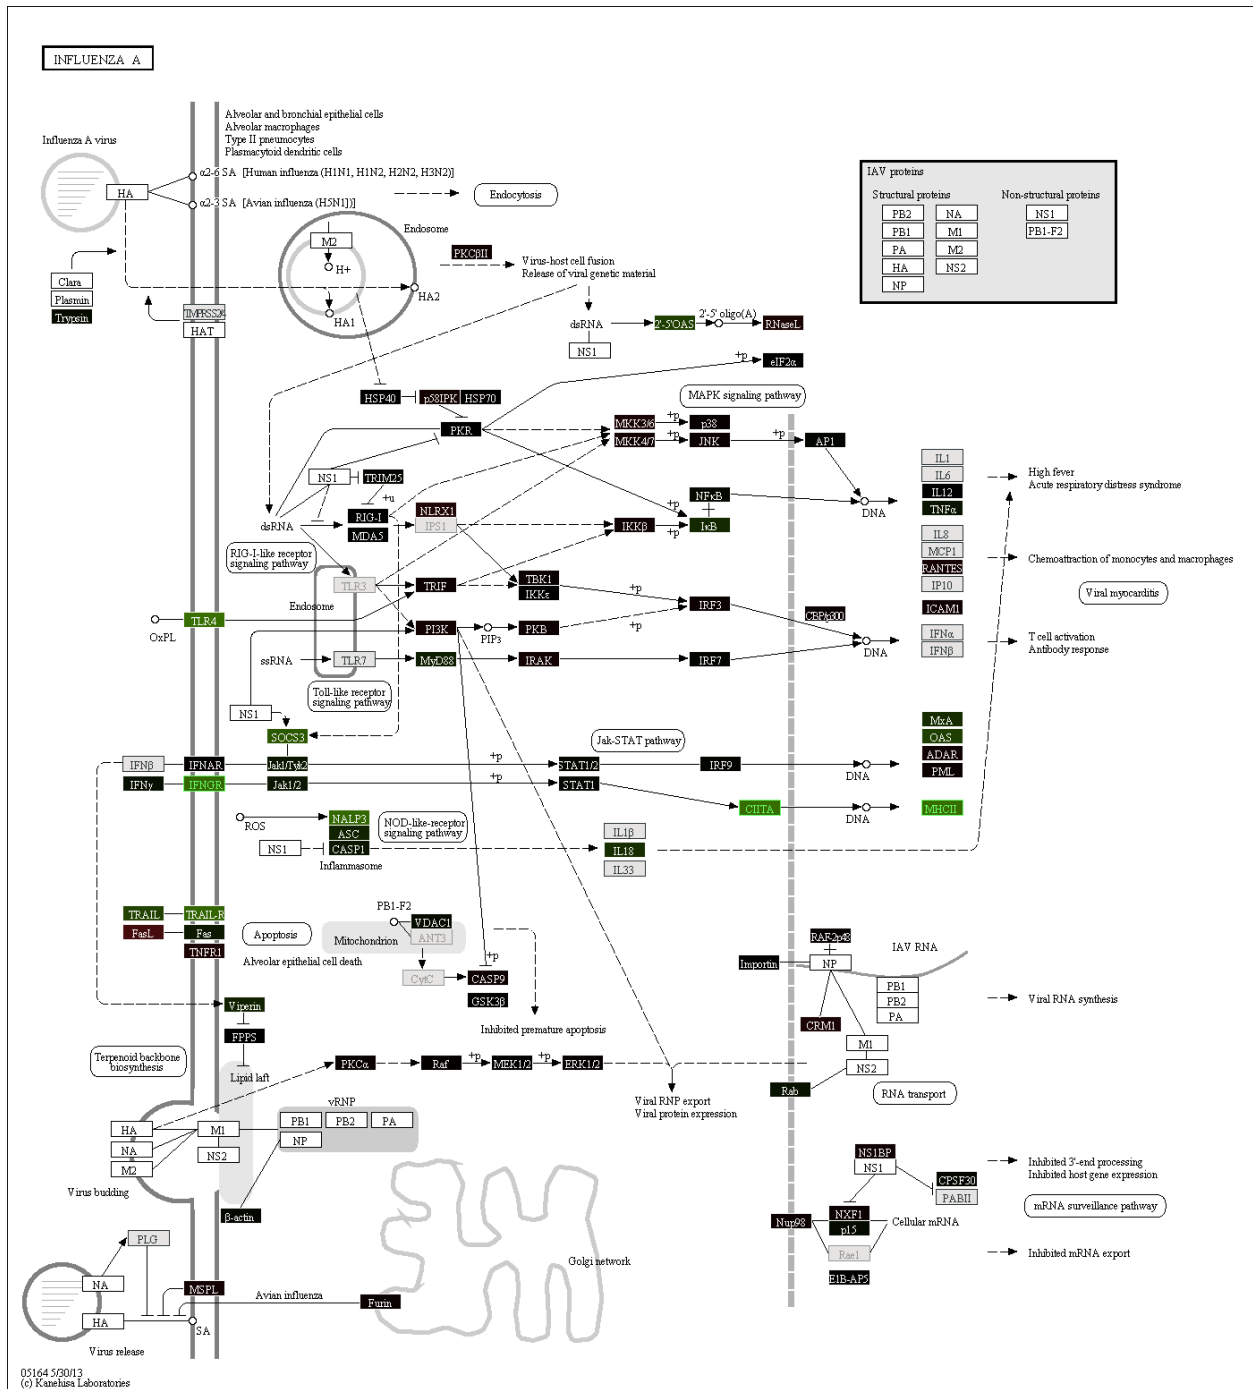

**Figure A122: KEGG Pathway Map - Influenza A (RNA-Seq, NK-cells, Day 28).** Node color gradient encodes fold change between vaccine groups (for multi-gene nodes the median fold change is used). In red: increased log fold change response for the SV-AS03 group relative to the SV-PBS group, in green: decreased log fold change response for the SV-AS03 group relative to the SV-AS03 group, and vice versa, in black: fold change close to 1, in dark grey: genes filtered out due to low overall expression, light grey: gene missing database mapping, white: non-human gene. Statistically significant fold changes are highlighted using red and green label colors.



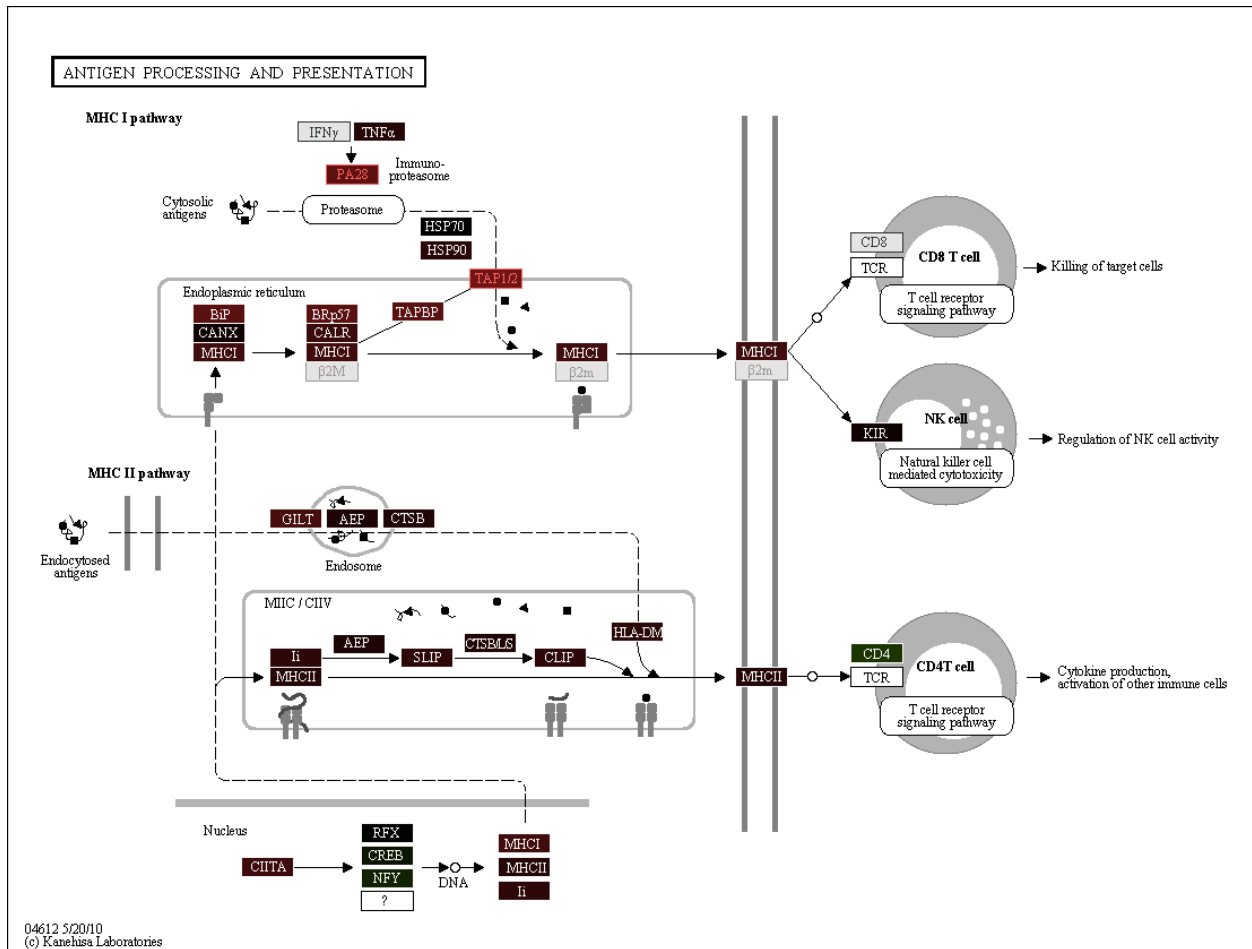

**Figure A124:** KEGG Pathway Map - Antigen processing and presentation (RNA-Seq, Dendritic cells, Day 1). Node color gradient encodes fold change between vaccine groups (for multi-gene nodes the median fold change is used). In red: increased log fold change response for the SV-AS03 group relative to the SV-PBS group, in green: decreased log fold change response for the SV-AS03 group relative to the SV-AS03 group, and vice versa, in black: fold change close to 1, in dark grey: genes filtered out due to low overall expression, light grey: gene missing database mapping, white: non-human gene. Statistically significant fold changes are highlighted using red and green label colors.

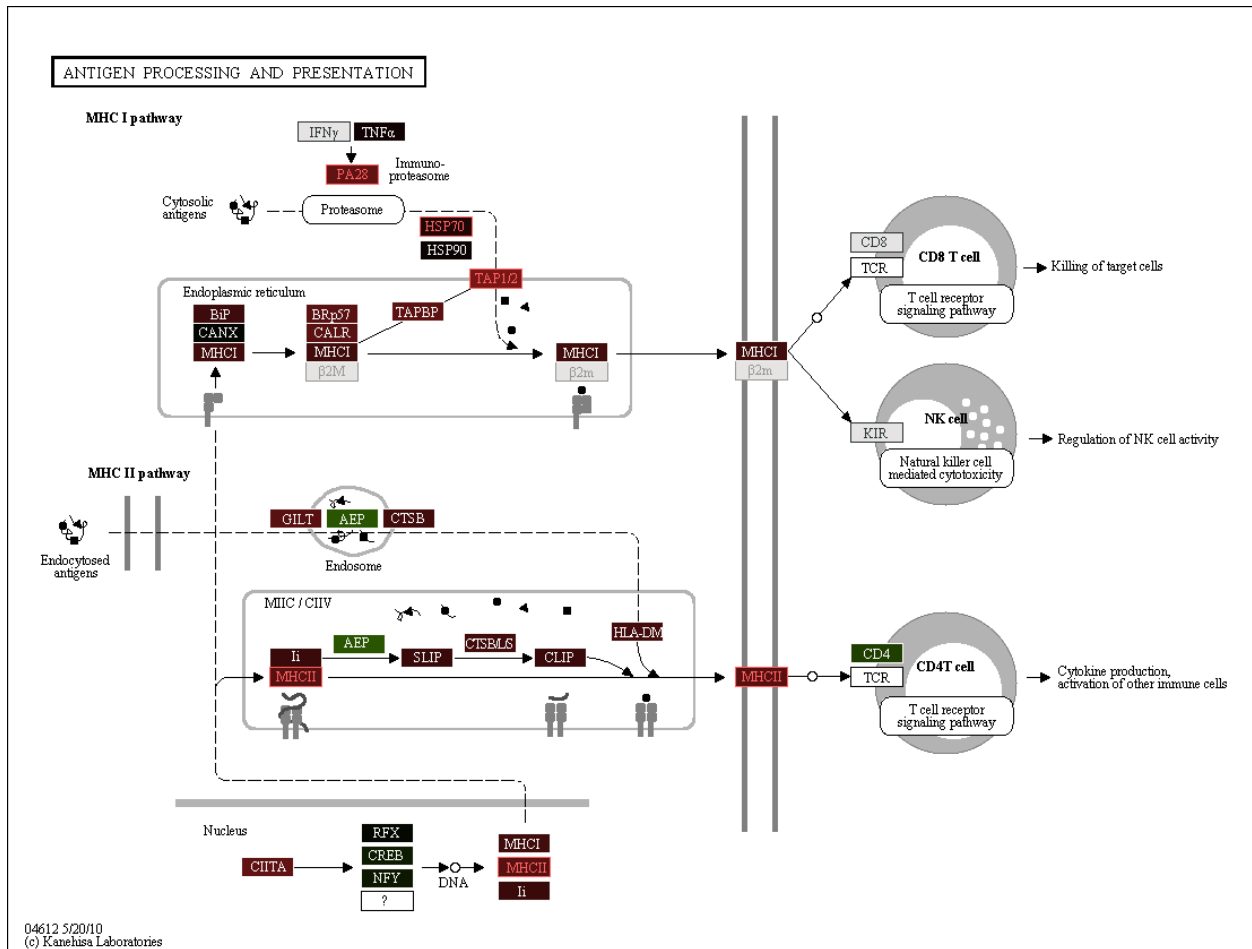

**Figure A125:** KEGG Pathway Map - Antigen processing and presentation (RNA-Seq, Monocytes, Day 1). Node color gradient encodes fold change between vaccine groups (for multi-gene nodes the median fold change is used). In red: increased log fold change response for the SV-AS03 group relative to the SV-PBS group, in green: decreased log fold change response for the SV-AS03 group relative to the SV-AS03 group, and vice versa, in black: fold change close to 1, in dark grey: genes filtered out due to low overall expression, light grey: gene missing database mapping, white: non-human gene. Statistically significant fold changes are highlighted using red and green label colors.

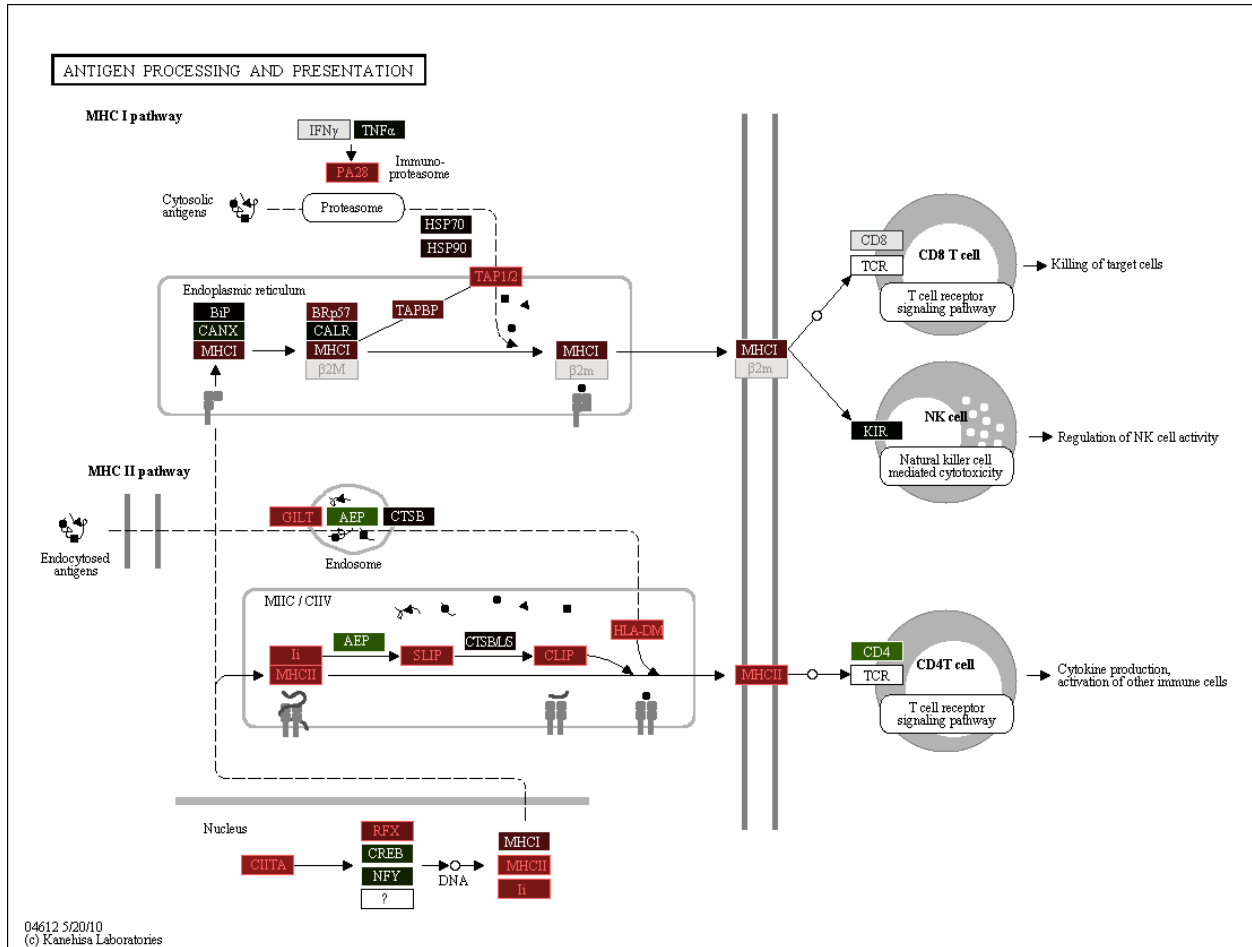

**Figure A126:** KEGG Pathway Map - Antigen processing and presentation (RNA-Seq, Neutrophils, Day 1). Node color gradient encodes fold change between vaccine groups (for multi-gene nodes the median fold change is used). In red: increased log fold change response for the SV-AS03 group relative to the SV-PBS group, in green: decreased log fold change response for the SV-AS03 group relative to the SV-AS03 group, and vice versa, in black: fold change close to 1, in dark grey: genes filtered out due to low overall expression, light grey: gene missing database mapping, white: non-human gene. Statistically significant fold changes are highlighted using red and green label colors.

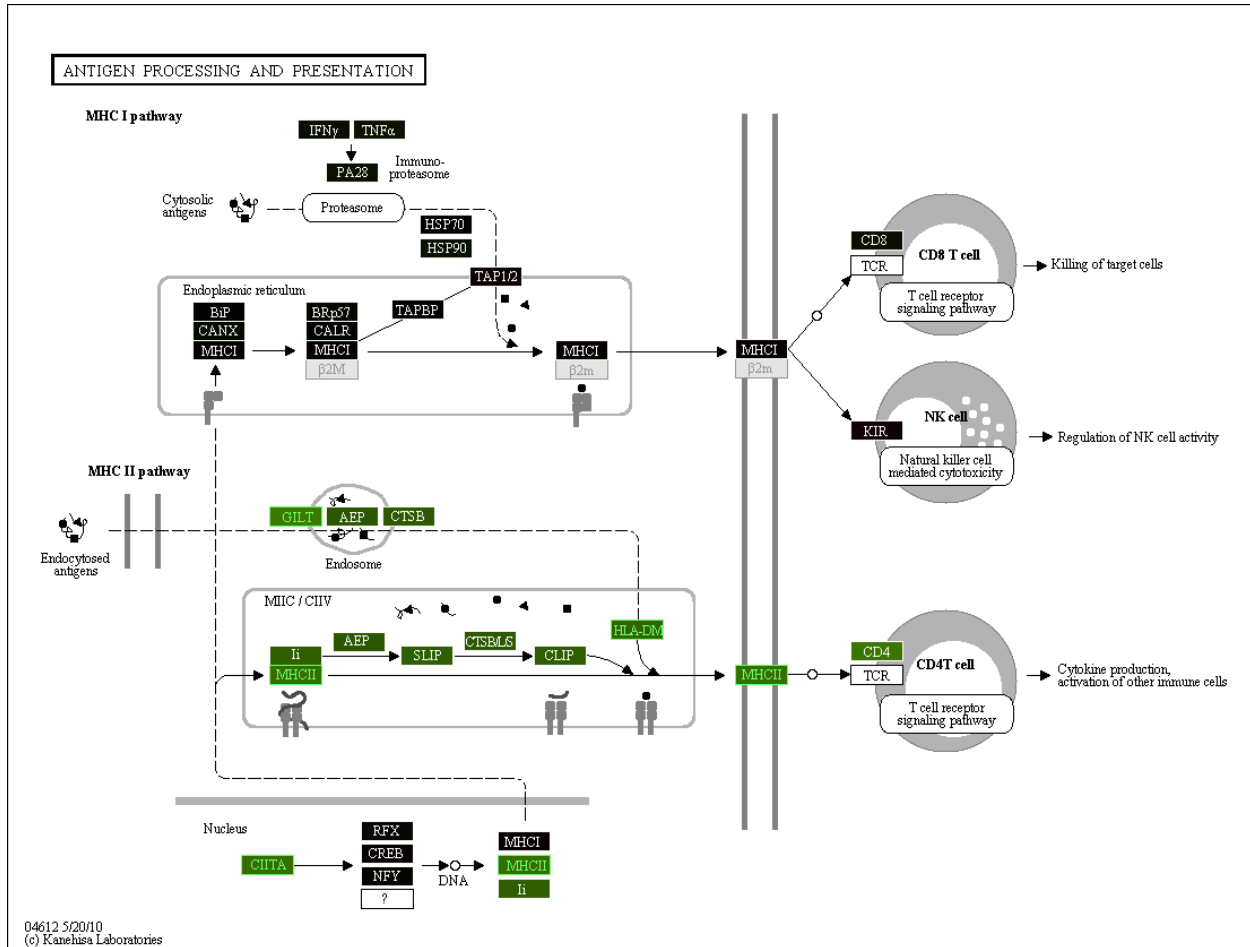

**Figure A127:** KEGG Pathway Map - Antigen processing and presentation (RNA-Seq, NK-cells, Day 28). Node color gradient encodes fold change between vaccine groups (for multi-gene nodes the median fold change is used). In red: increased log fold change response for the SV-AS03 group relative to the SV-PBS group, in green: decreased log fold change response for the SV-AS03 group relative to the SV-AS03 group, and vice versa, in black: fold change close to 1, in dark grey: genes filtered out due to low overall expression, light grey: gene missing database mapping, white: non-human gene. Statistically significant fold changes are highlighted using red and green label colors.



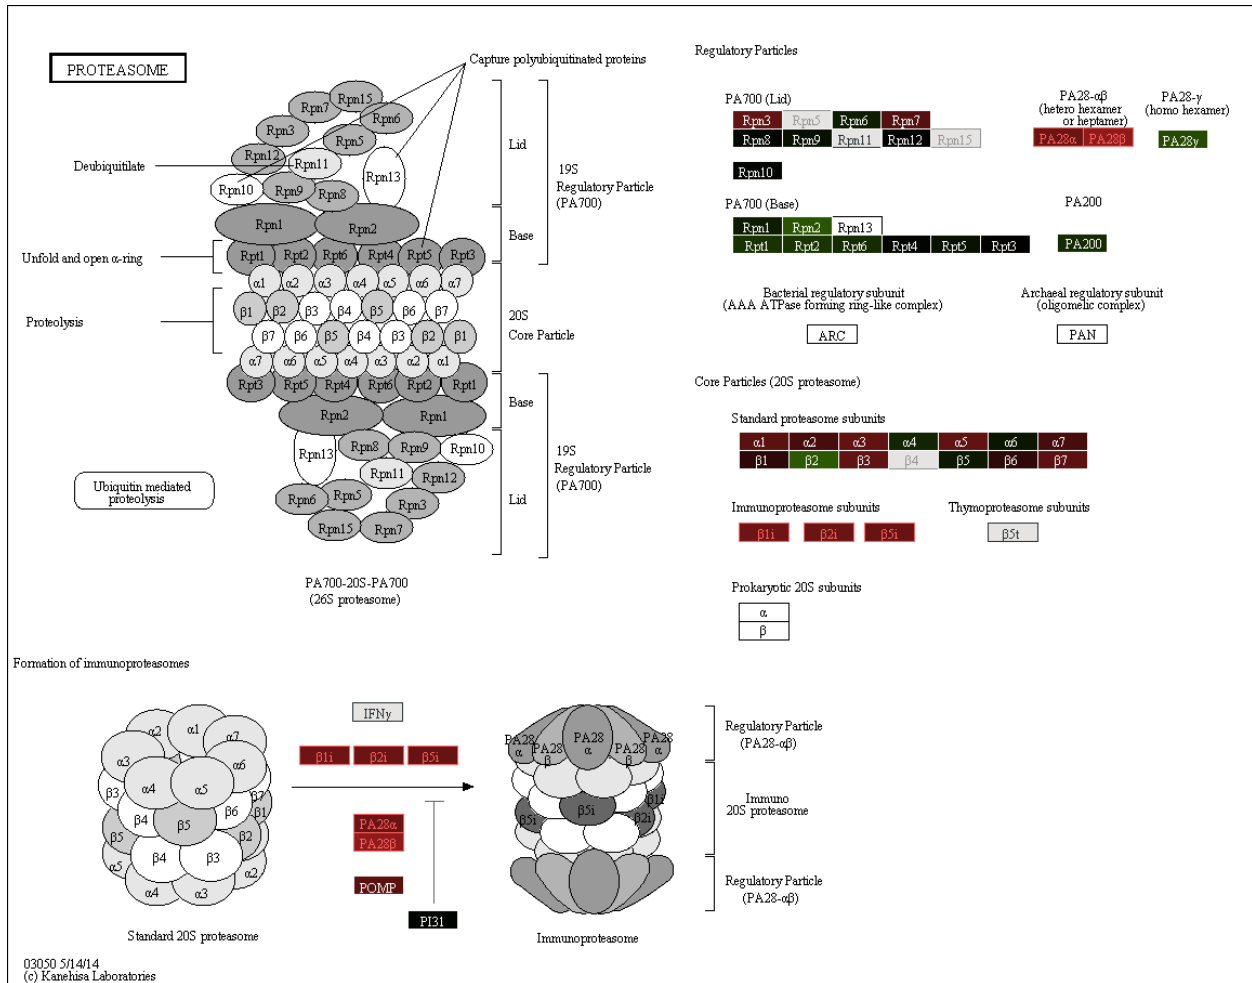

**Figure A128:** KEGG Pathway Map - Proteasome (RNA-Seq, Neutrophils, Day 1). Node color gradient encodes fold change between vaccine groups (for multi-gene nodes the median fold change is used). In red: increased log fold change response for the SV-AS03 group relative to the SV-PBS group, in green: decreased log fold change response for the SV-AS03 group relative to the SV-AS03 group, and vice versa, in black: fold change close to 1, in dark grey: genes filtered out due to low overall expression, light grey: gene missing database mapping, white: non-human gene. Statistically significant fold changes are highlighted using red and green label colors.

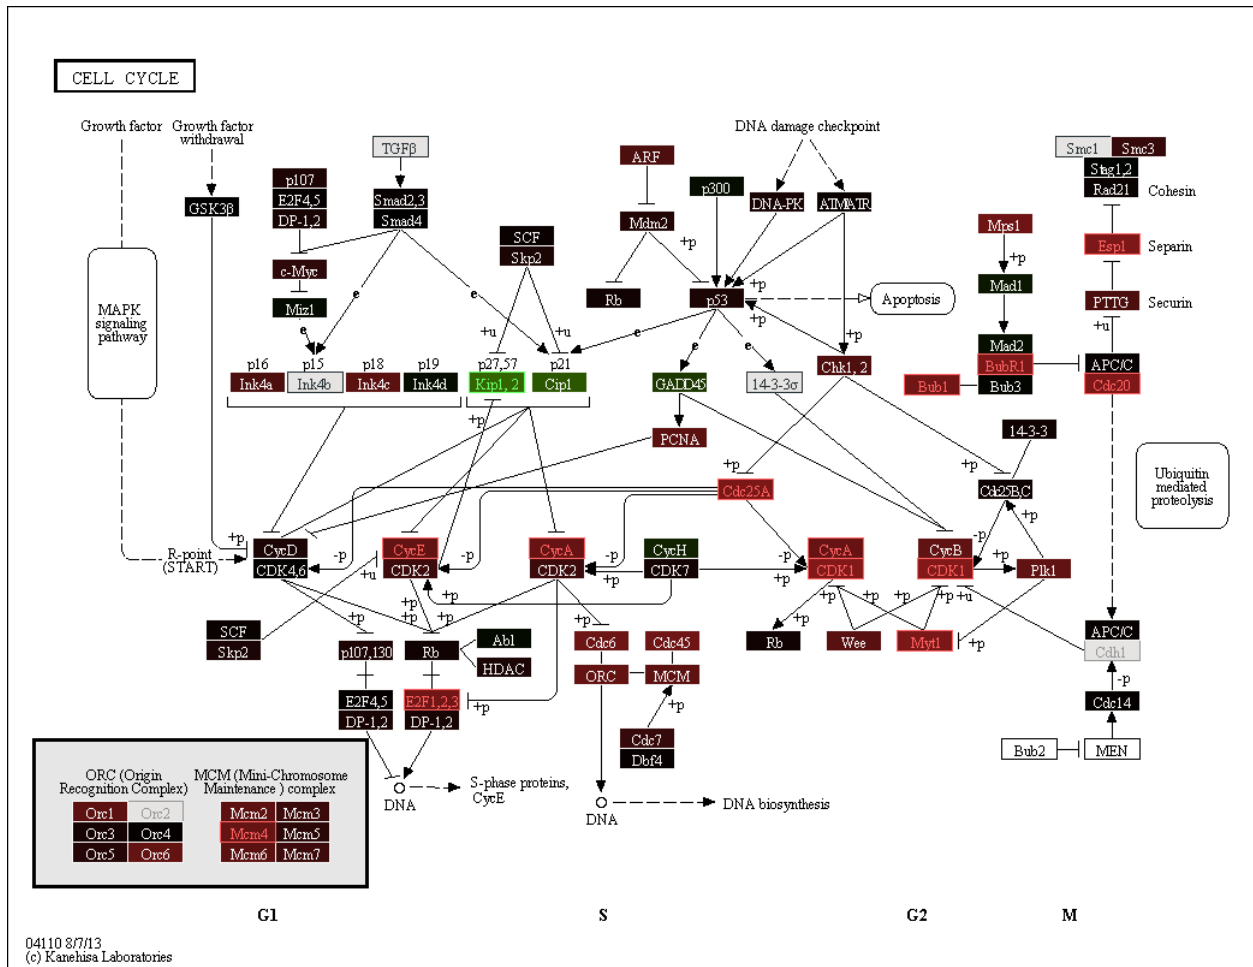

**Figure A129:** KEGG Pathway Map - Cell cycle (RNA-Seq, NK-cells, Day 3). Node color gradient encodes fold change between vaccine groups (for multi-gene nodes the median fold change is used). In red: increased log fold change response for the SV-AS03 group relative to the SV-PBS group, in green: decreased log fold change response for the SV-AS03 group relative to the SV-AS03 group, and vice versa, in black: fold change close to 1, in dark grey: genes filtered out due to low overall expression, light grey: gene missing database mapping, white: non-human gene. Statistically significant fold changes are highlighted using red and green label colors.

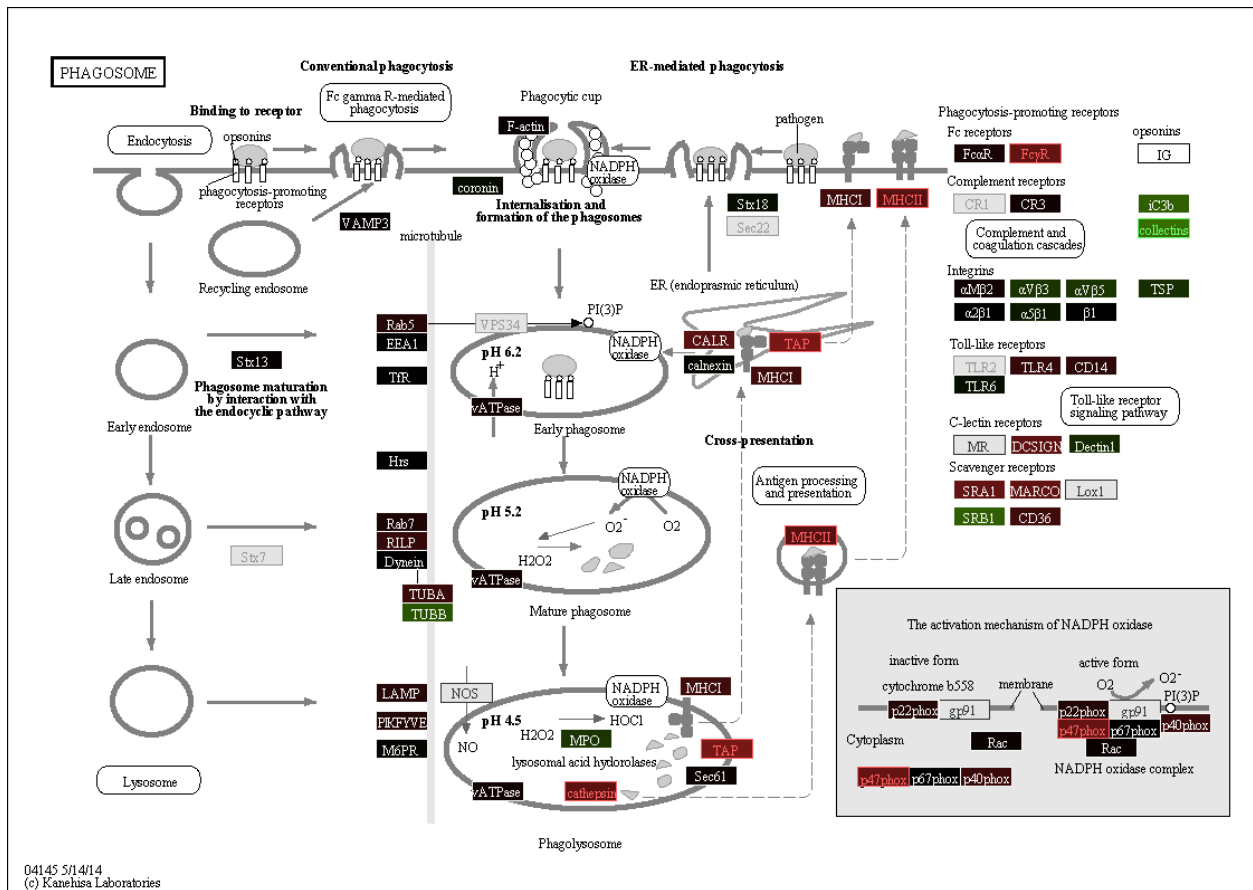

**Figure A130:** KEGG Pathway Map - Phagosome (RNA-Seq, Monocytes, Day 1). Node color gradient encodes fold change between vaccine groups (for multi-gene nodes the median fold change is used). In red: increased log fold change response for the SV-AS03 group relative to the SV-PBS group, in green: decreased log fold change response for the SV-AS03 group relative to the SV-AS03 group, and vice versa, in black: fold change close to 1, in dark grey: genes filtered out due to low overall expression, light grey: gene missing database mapping, white: non-human gene. Statistically significant fold changes are highlighted using red and green label colors.

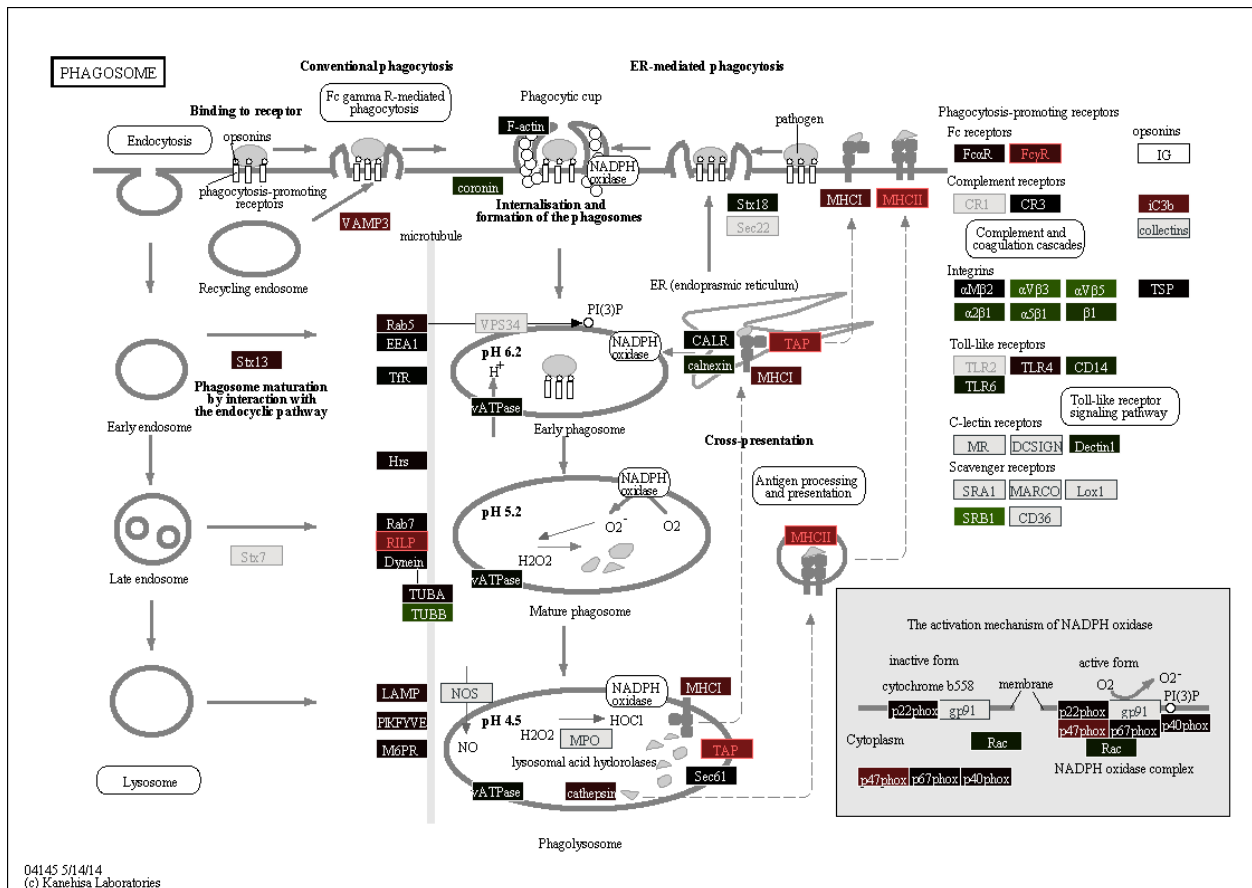

**Figure A131:** KEGG Pathway Map - Phagosome (RNA-Seq, Neutrophils, Day 1). Node color gradient encodes fold change between vaccine groups (for multi-gene nodes the median fold change is used). In red: increased log fold change response for the SV-AS03 group relative to the SV-PBS group, in green: decreased log fold change response for the SV-AS03 group relative to the SV-AS03 group, and vice versa, in black: fold change close to 1, in dark grey: genes filtered out due to low overall expression, light grey: gene missing database mapping, white: non-human gene. Statistically significant fold changes are highlighted using red and green label colors.

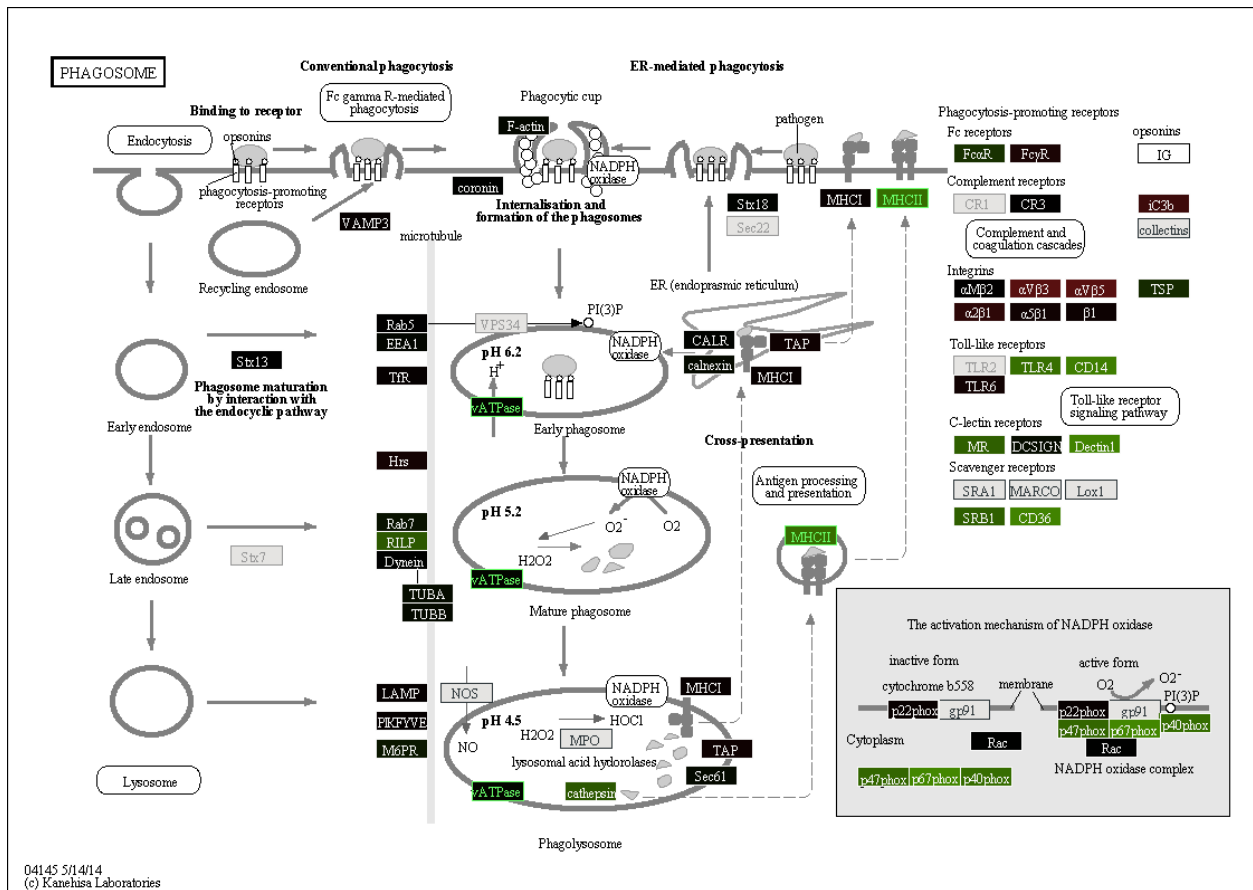

**Figure A132:** KEGG Pathway Map - Phagosome (RNA-Seq, NK-cells, Day 28). Node color gradient encodes fold change between vaccine groups (for multi-gene nodes the median fold change is used). In red: increased log fold change response for the SV-AS03 group relative to the SV-PBS group, in green: decreased log fold change response for the SV-AS03 group relative to the SV-AS03 group, and vice versa, in black: fold change close to 1, in dark grey: genes filtered out due to low overall expression, light grey: gene missing database mapping, white: non-human gene. Statistically significant fold changes are highlighted using red and green label colors.

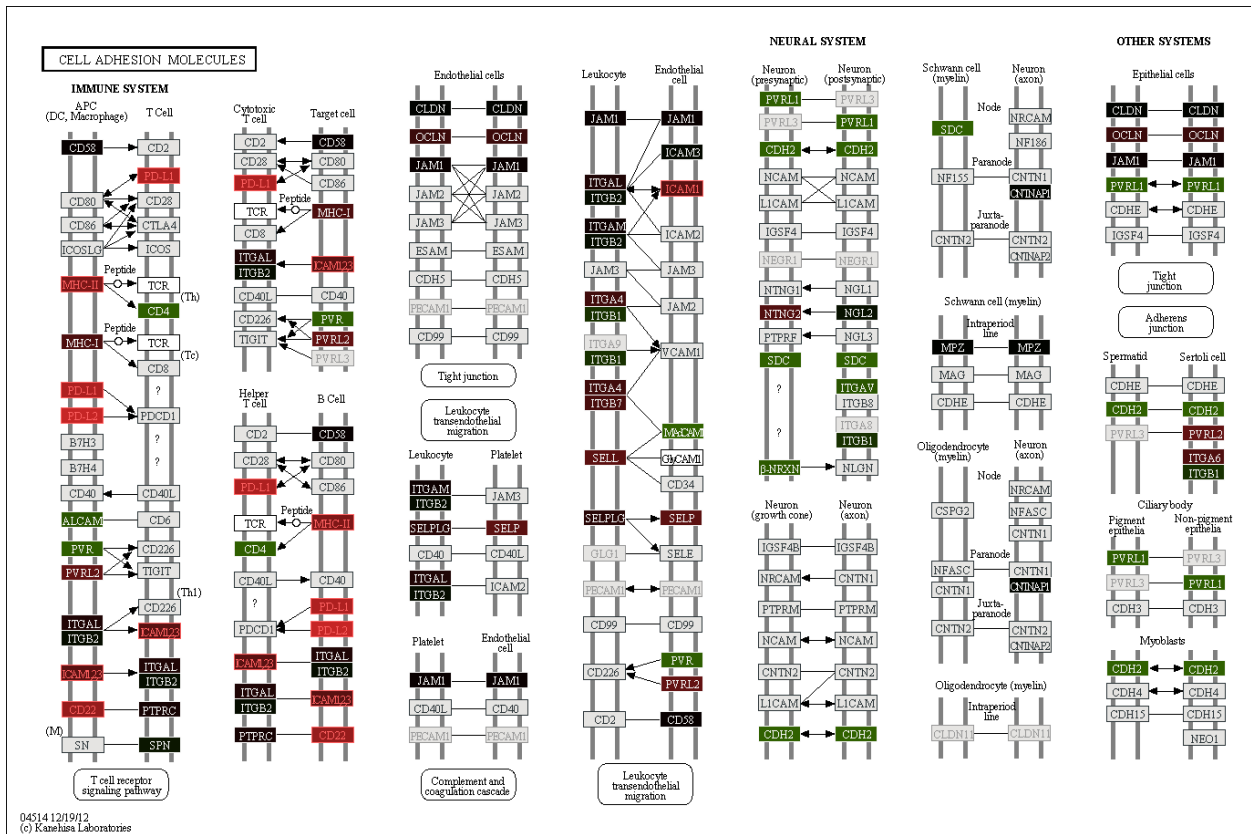

**Figure A133: KEGG Pathway Map - Cell adhesion molecules (CAMs) (RNA-Seq, Neutrophils, Day 1).** Node color gradient encodes fold change between vaccine groups (for multi-gene nodes the median fold change is used). In red: increased log fold change response for the SV-AS03 group relative to the SV-PBS group, in green: decreased log fold change response for the SV-AS03 group relative to the SV-AS03 group, and vice versa, in black: fold change close to 1, in dark grey: genes filtered out due to low overall expression, light grey: gene missing database mapping, white: non-human gene. Statistically significant fold changes are highlighted using red and green label colors.

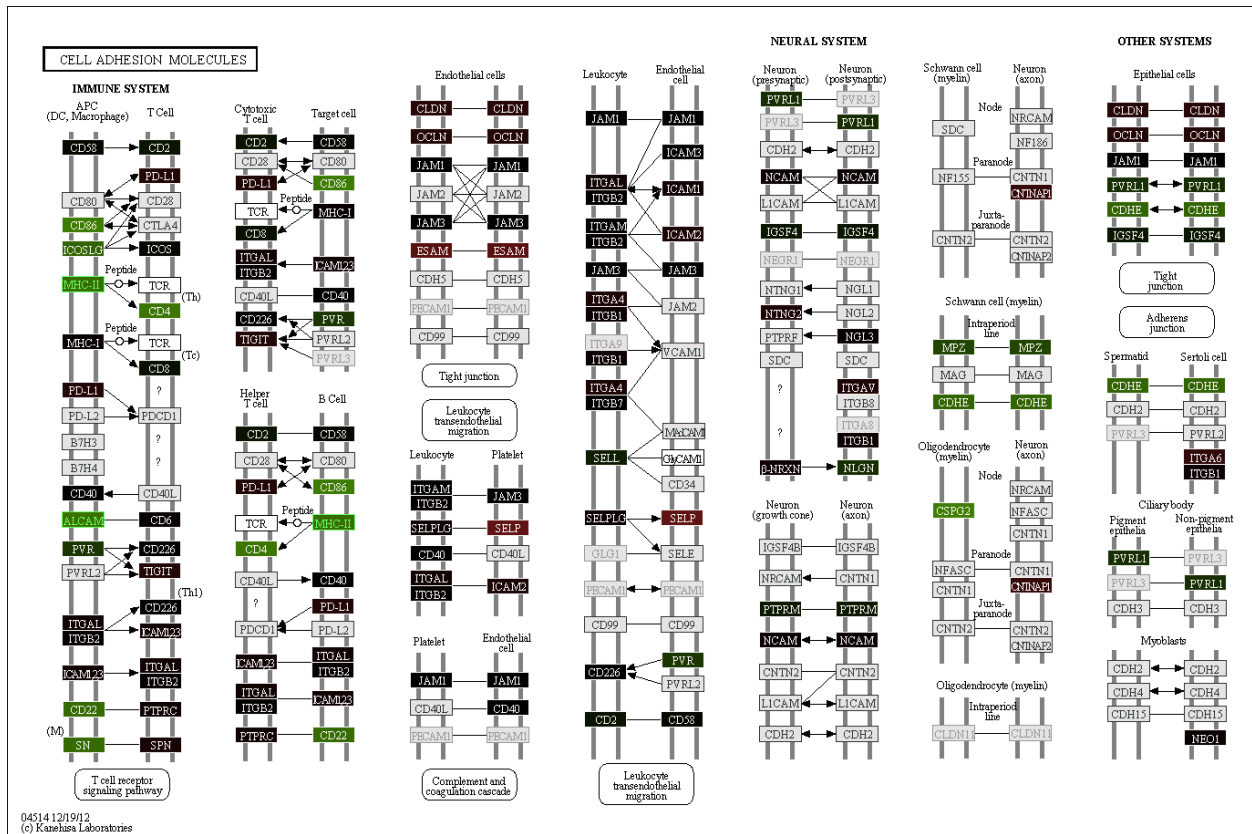

**Figure A134:** KEGG Pathway Map - Cell adhesion molecules (CAMs) (RNA-Seq, NK-cells, Day 28). Node color gradient encodes fold change between vaccine groups (for multi-gene nodes the median fold change is used). In red: increased log fold change response for the SV-AS03 group relative to the SV-PBS group, in green: decreased log fold change response for the SV-AS03 group relative to the SV-AS03 group, and vice versa, in black: fold change close to 1, in dark grey: genes filtered out due to low overall expression, light grey: gene missing database mapping, white: non-human gene. Statistically significant fold changes are highlighted using red and green label colors.

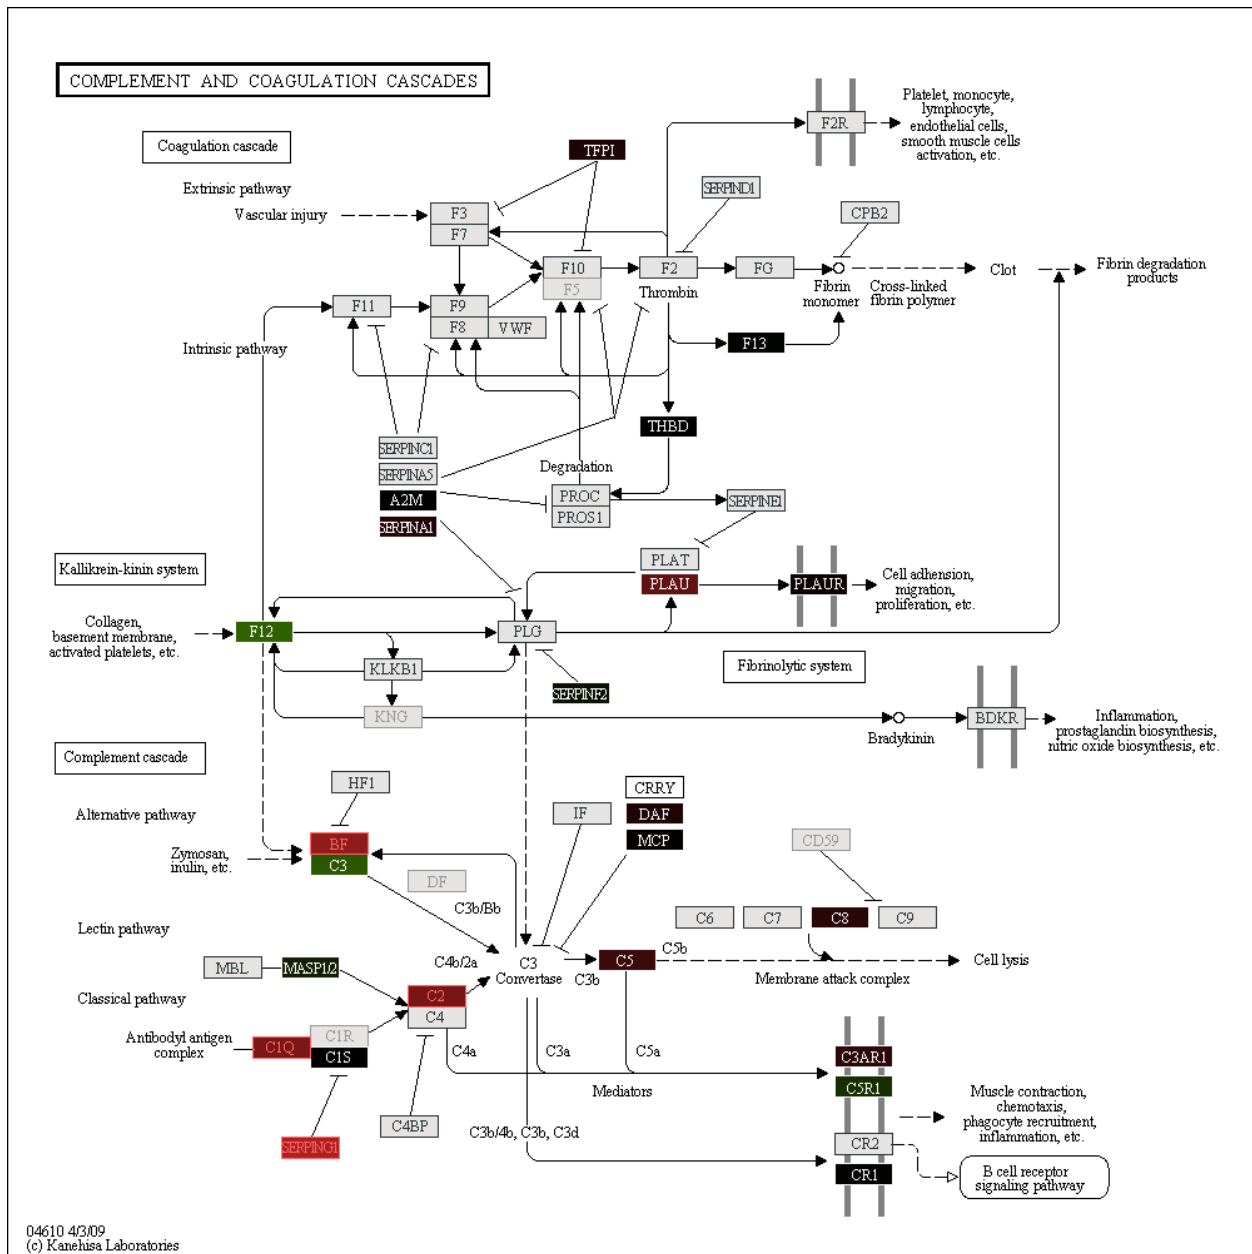

**Figure A135:** KEGG Pathway Map - Complement and coagulation cascades (RNA-Seq, Dendritic cells, Day 1). Node color gradient encodes fold change between vaccine groups (for multi-gene nodes the median fold change is used). In red: increased log fold change response for the SV-AS03 group relative to the SV-PBS group, in green: decreased log fold change response for the SV-AS03 group relative to the SV-AS03 group, and vice versa, in black: fold change close to 1, in dark grey: genes filtered out due to low overall expression, light grey: gene missing database mapping, white: non-human gene. Statistically significant fold changes are highlighted using red and green label colors.



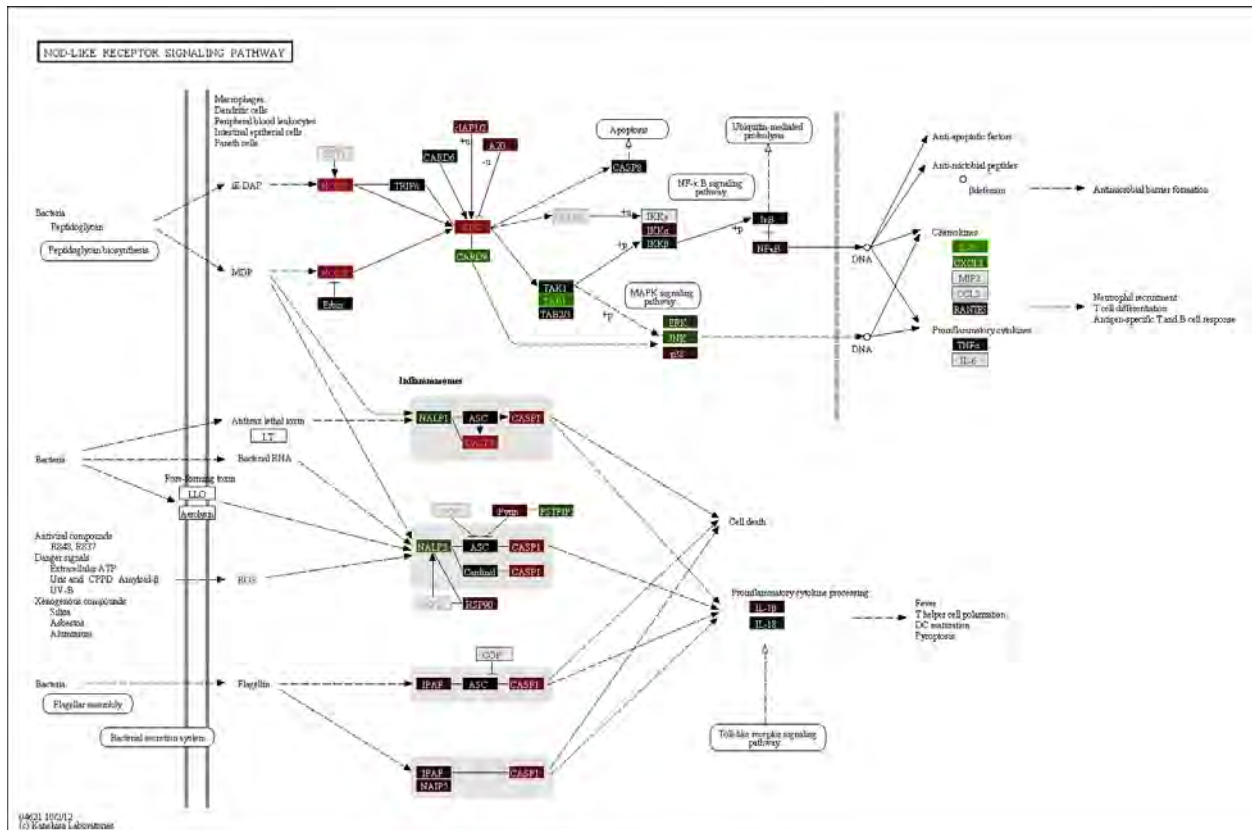

**Figure A136:** KEGG Pathway Map - NOD-like receptor signaling pathway (RNA-Seq, Neutrophils, Day 1). Node color gradient encodes fold change between vaccine groups (for multi-gene nodes the median fold change is used). In red: increased log fold change response for the SV-AS03 group relative to the SV-PBS group, in green: decreased log fold change response for the SV-AS03 group relative to the SV-AS03 group, and vice versa, in black: fold change close to 1, in dark grey: genes filtered out due to low overall expression, light grey: gene missing database mapping, white: non-human gene. Statistically significant fold changes are highlighted using red and green label colors.

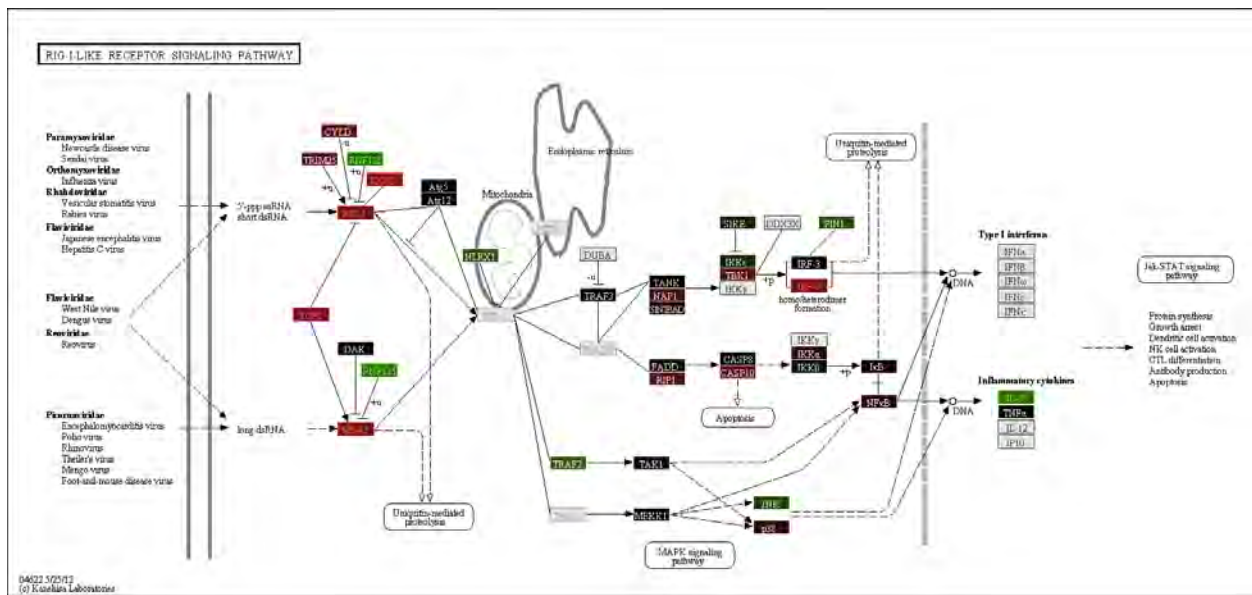

**Figure A137:** KEGG Pathway Map - RIG-I-like receptor signaling pathway (RNA-Seq, Neutrophils, Day 1). Node color gradient encodes fold change between vaccine groups (for multi-gene nodes the median fold change is used). In red: increased log fold change response for the SV-AS03 group relative to the SV-PBS group, in green: decreased log fold change response for the SV-AS03 group relative to the SV-AS03 group, and vice versa, in black: fold change close to 1, in dark grey: genes filtered out due to low overall expression, light grey: gene missing database mapping, white: non-human gene. Statistically significant fold changes are highlighted using red and green label colors.

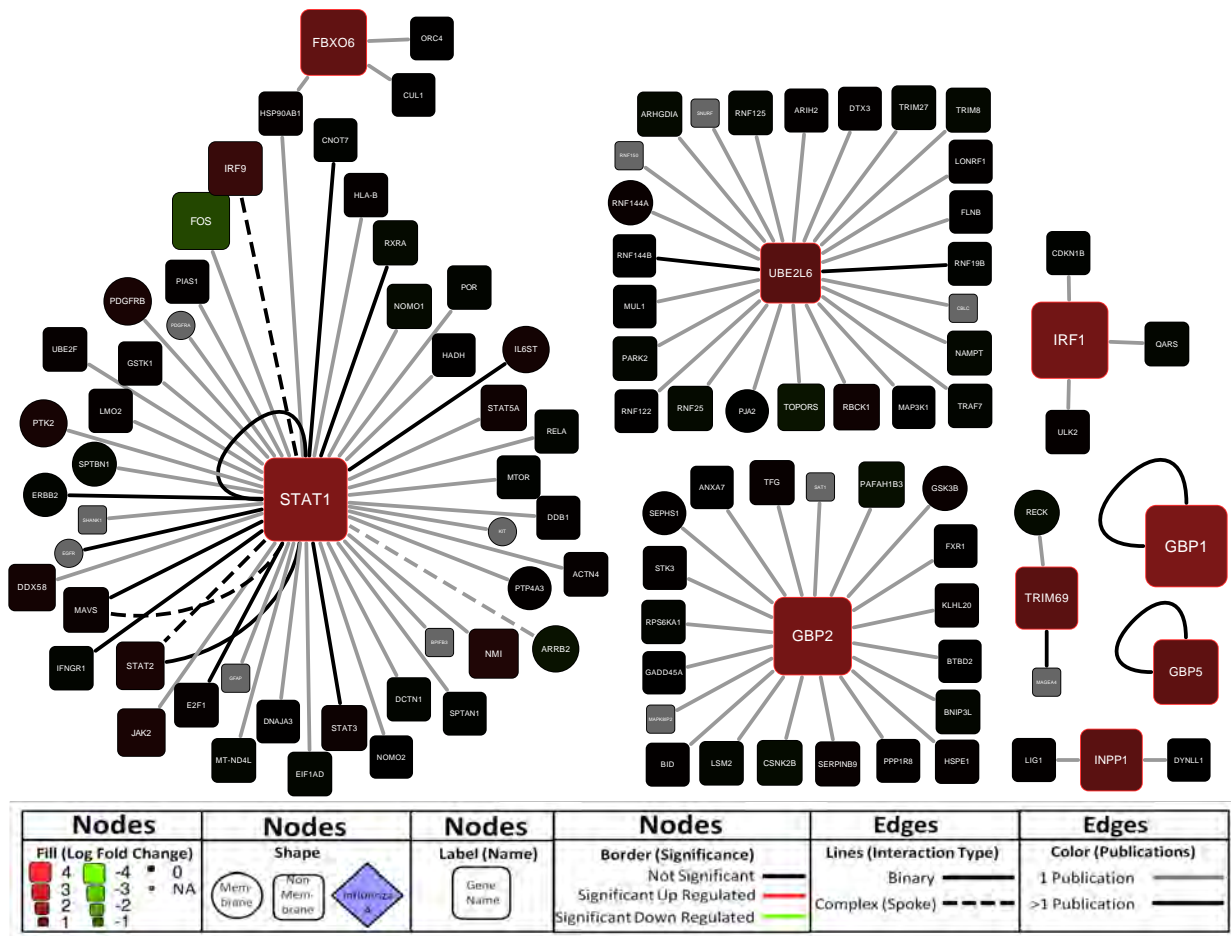

**Figure A138:** Integrated protein-protein interaction network based on significant genes (B-cells, Day 1). Human-human and human-*Influenza A* experimental interactions for which one interacting partner is encoded by a significant gene.

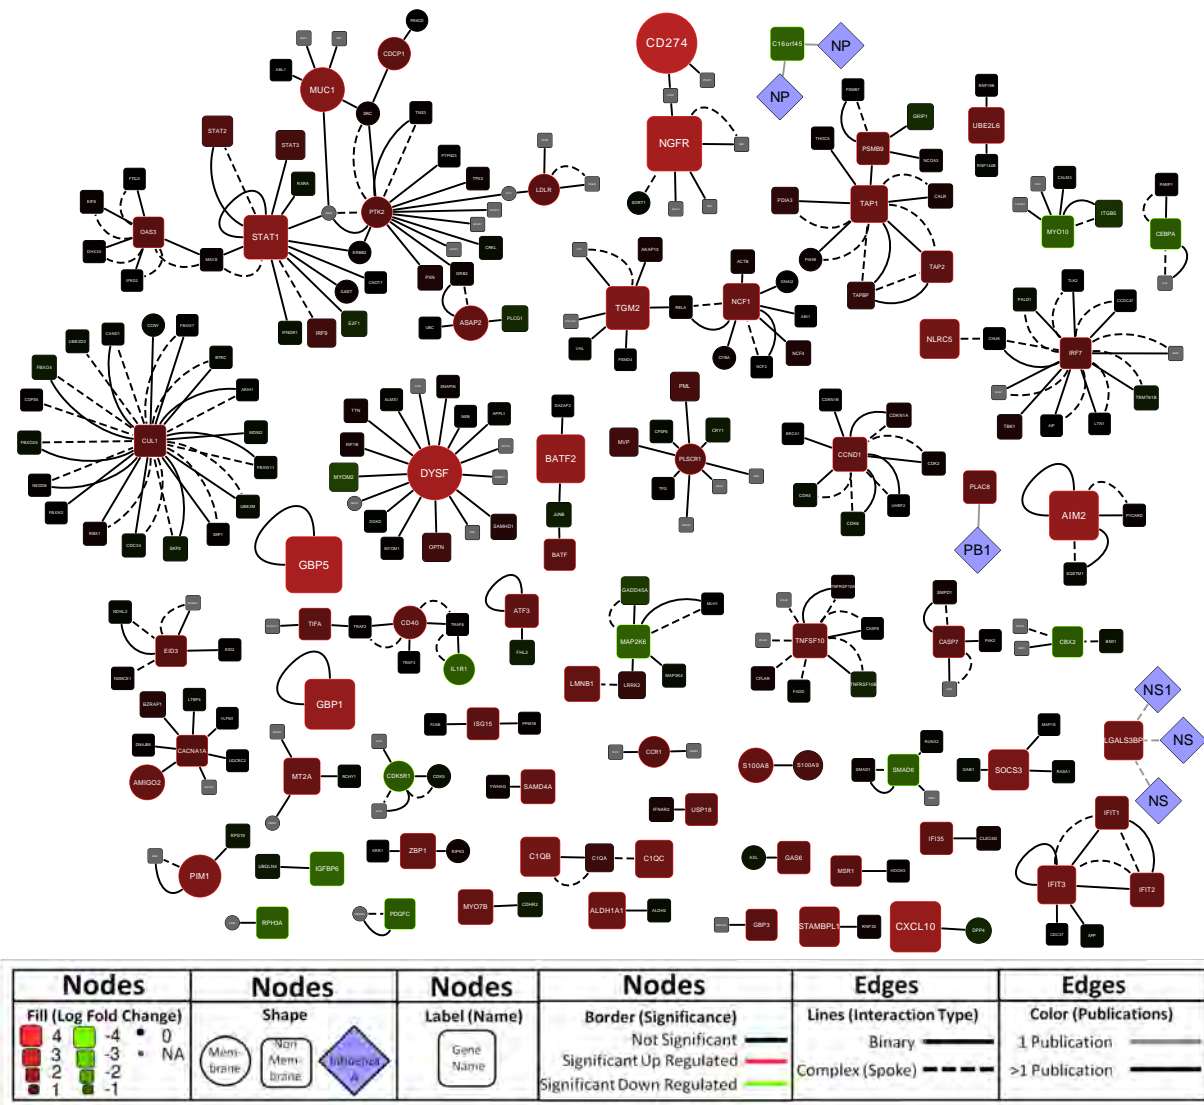

**Figure A139:** Integrated protein-protein interaction network based on significant genes (Dendritic cells, Day 1). Human-human and human-*Influenza A* experimental interactions for which one interacting partner is encoded by a significant gene.

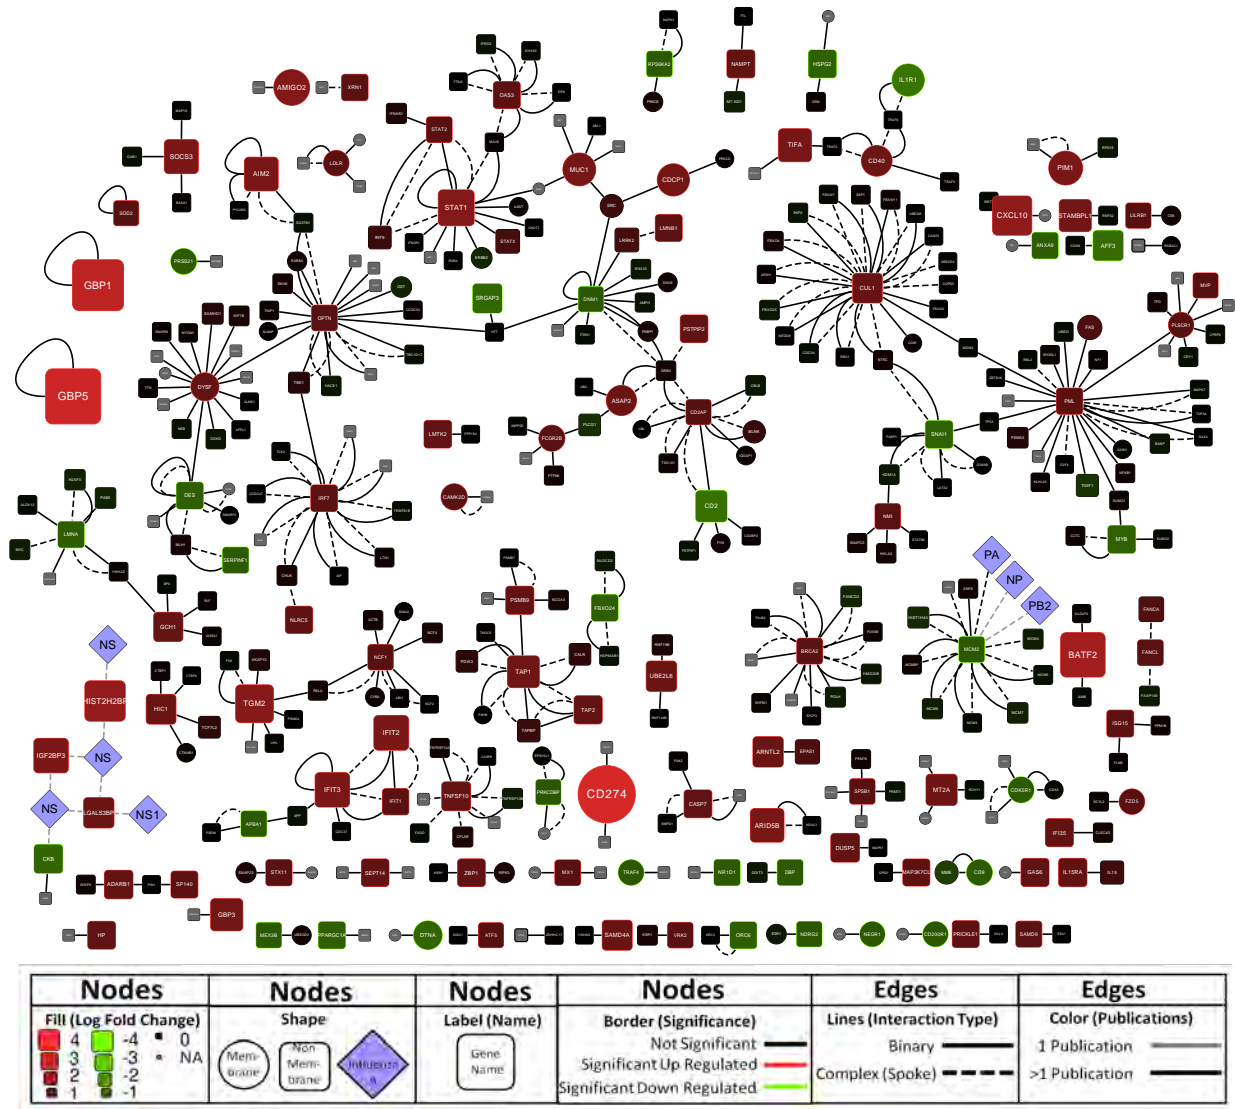

**Figure A140:** Integrated protein-protein interaction network based on significant genes (Monocytes Day 1). Human-human and human-*Influenza A* experimental interactions for which one interacting partner is encoded by a significant gene (human-human protein interactions are only shown if supported by at least two publications).

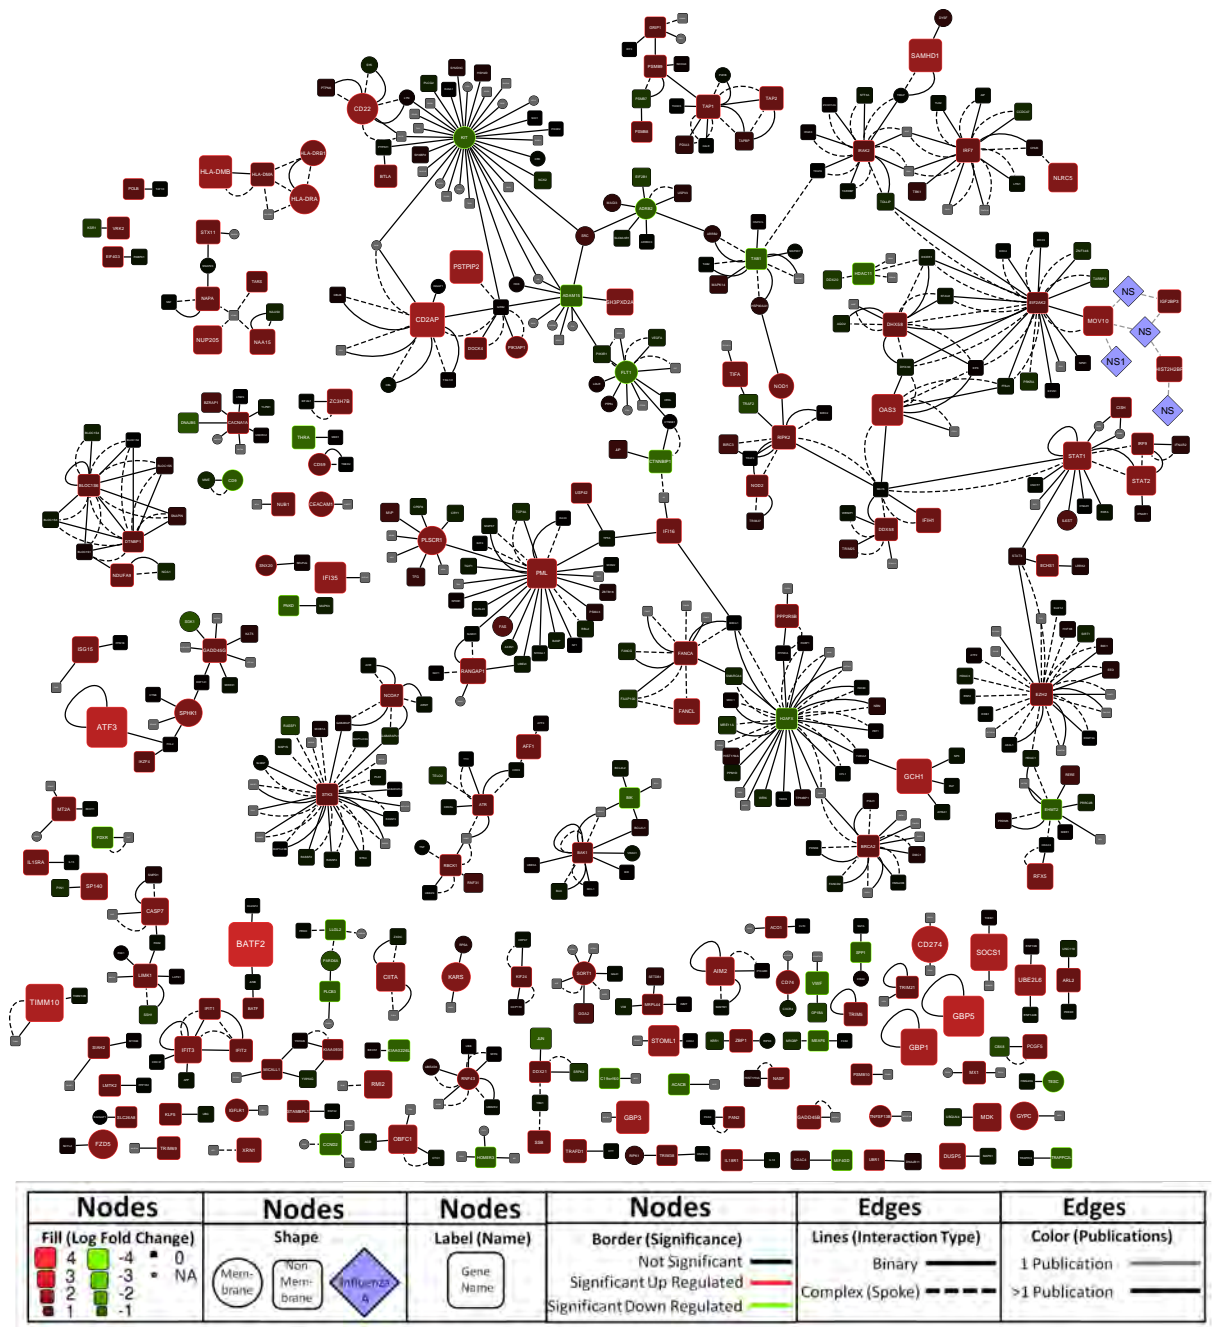

**Figure A141:** Integrated protein-protein interaction network based on significant genes (Neutrophils Day 1). Human-human and human-*Influenza A* experimental interactions for which one interacting partner is encoded by a significant gene (human-human protein interactions are only shown if supported by at least two publications).

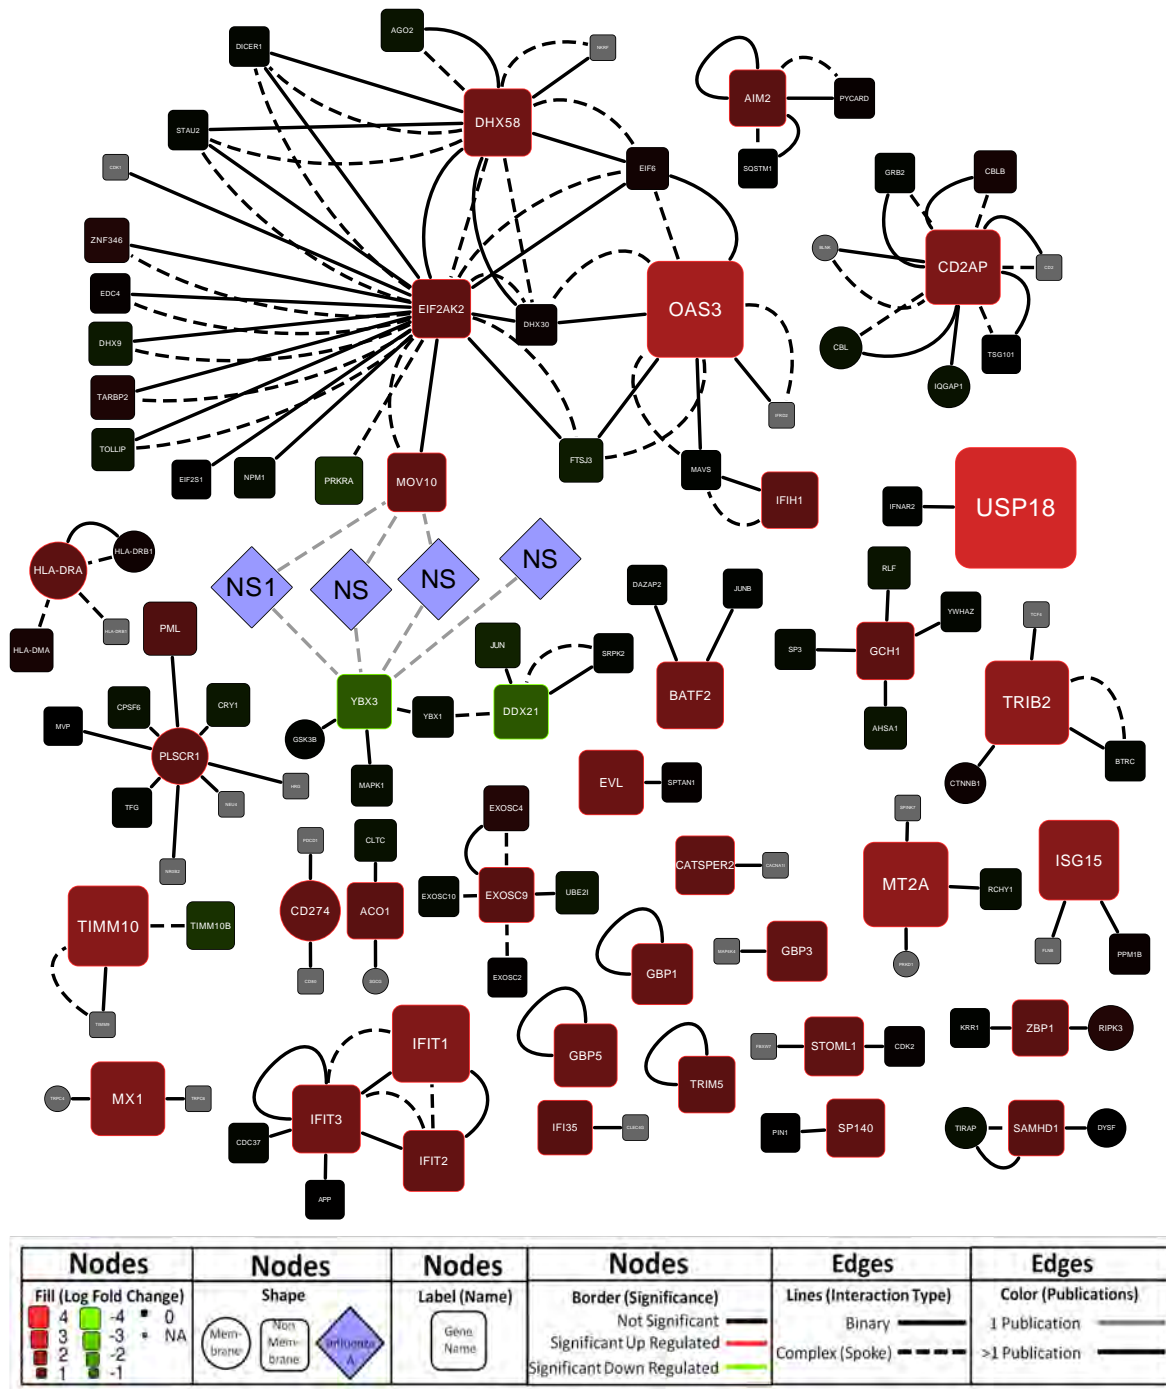

**Figure A142:** Integrated protein-protein interaction network based on significant genes (Neutrophils Day 1). Human-human and human-*Influenza A* experimental interactions for which one interacting partner is encoded by a significant gene (human-human protein interactions are only shown if supported by at least two publications).

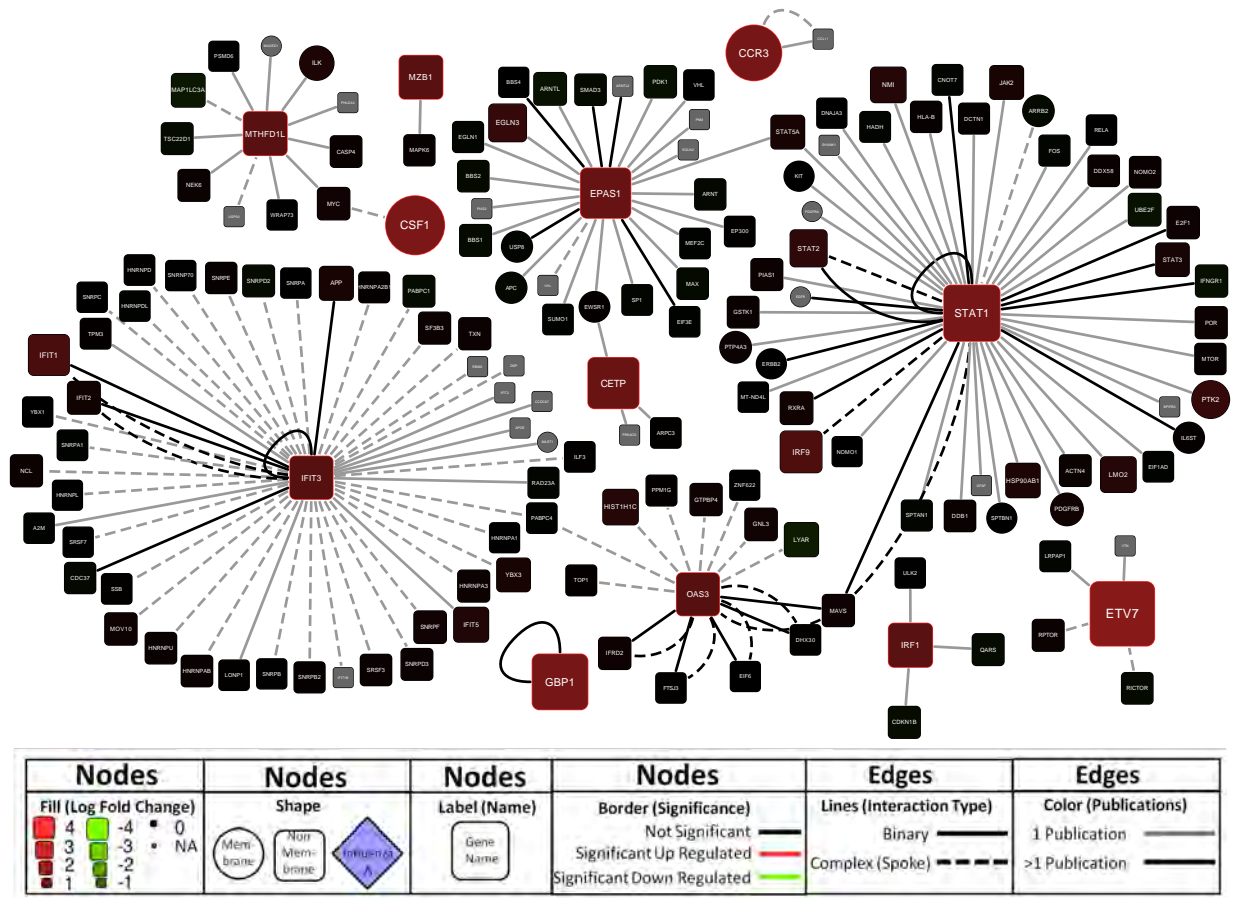

**Figure A143:** Integrated protein-protein interaction network based on significant genes (NK-cells Day 1). Human-human and human-*Influenza A* experimental interactions for which one interacting partner is encoded by a significant gene.



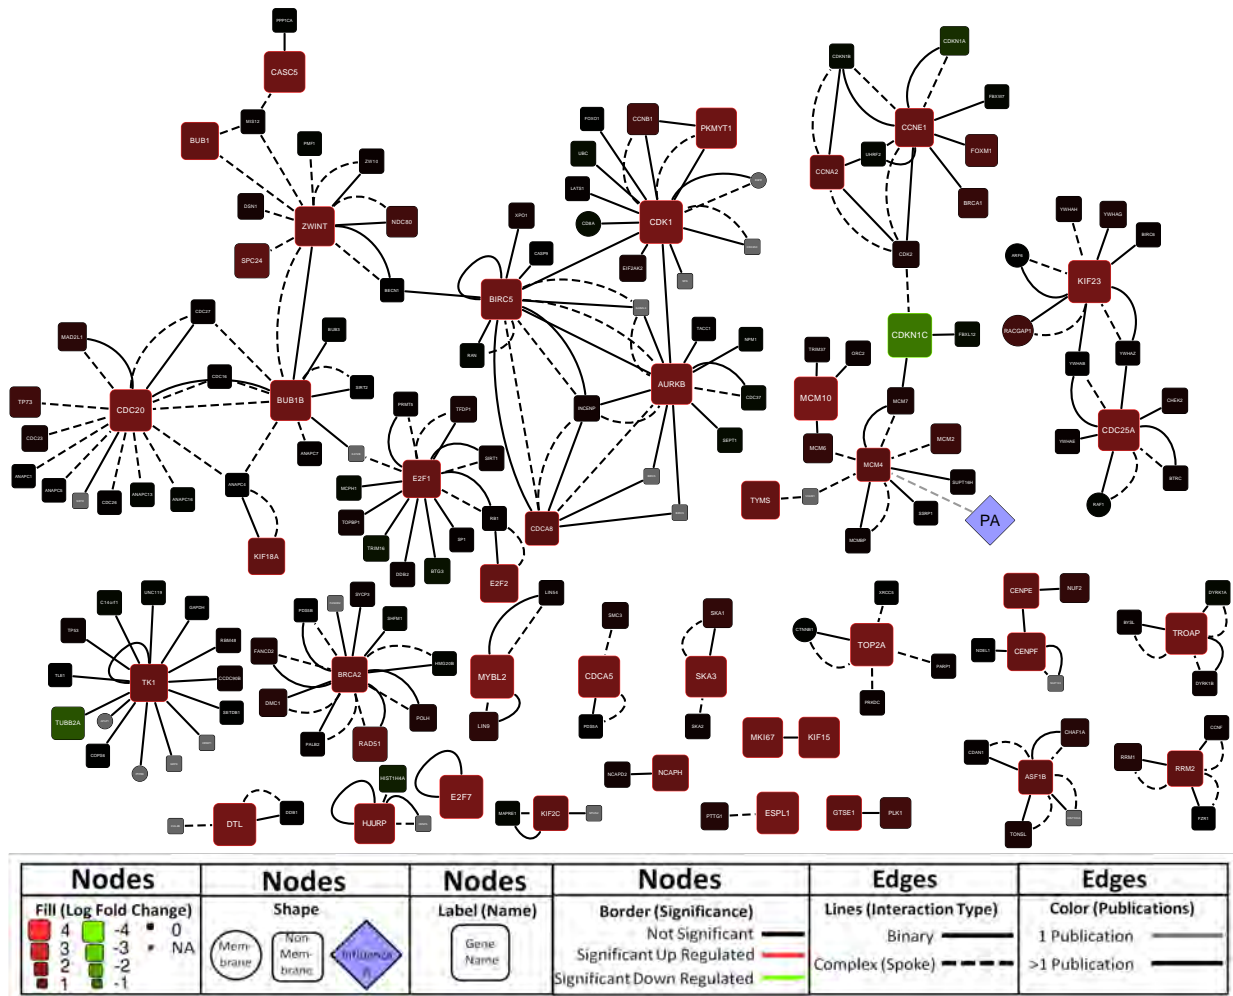

**Figure A144:** Integrated protein-protein interaction network based on significant genes (NK-cells Day 3). Human-human and human-*Influenza A* experimental interactions for which one interacting partner is encoded by a significant gene (human-human protein interactions are only shown if supported by at least two publications).

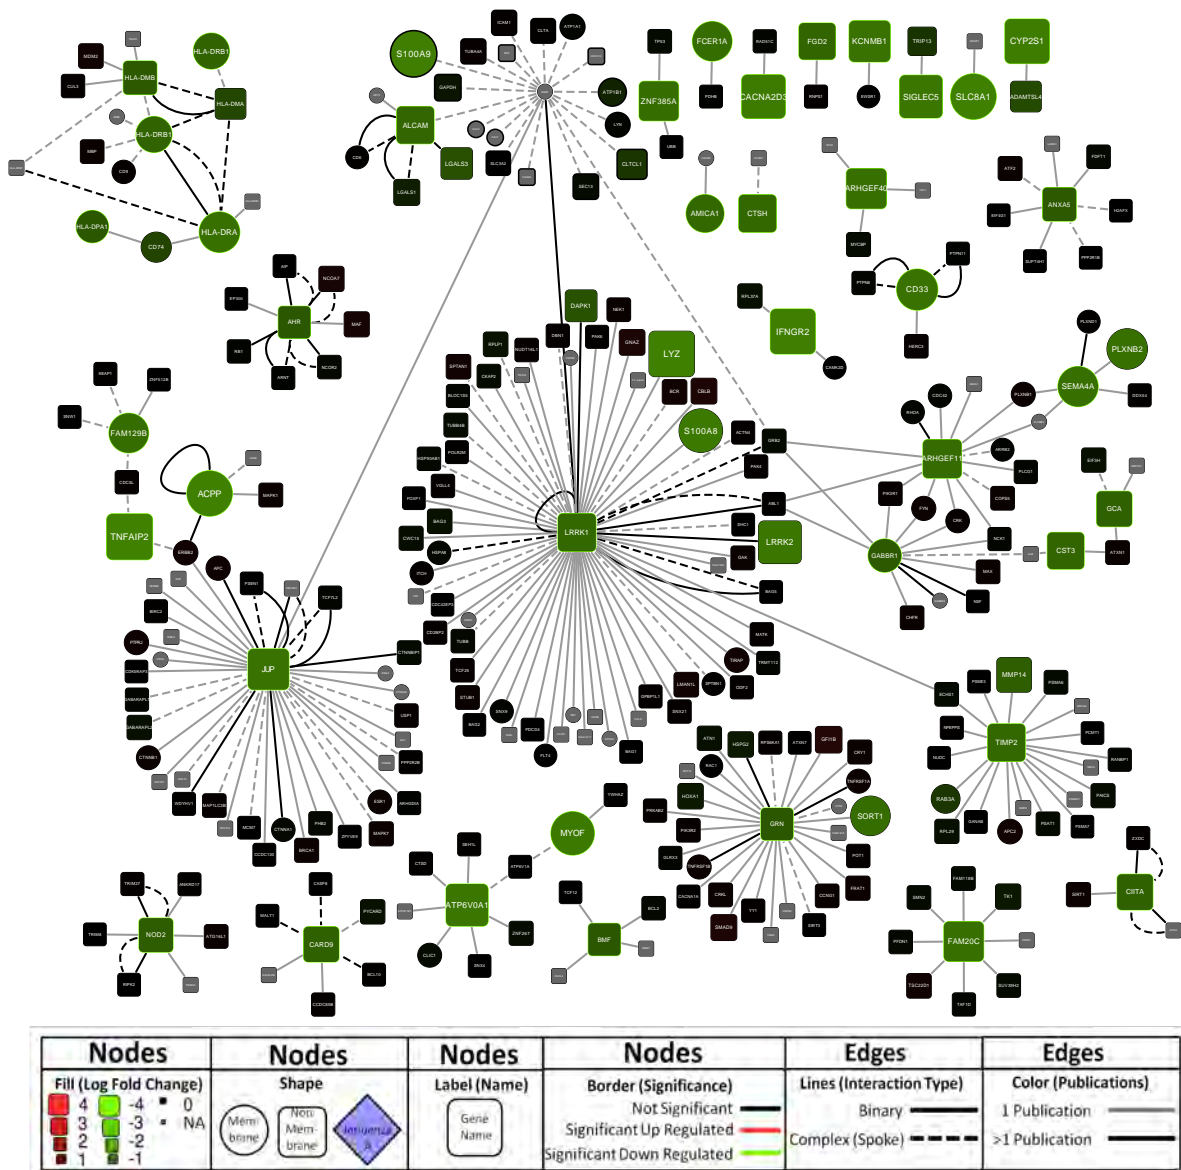

**Figure A145:** Integrated protein-protein interaction network based on significant genes (NK-cells Day 28). Human-human and human-*Influenza A* experimental interactions for which one interacting partner is encoded by a significant gene.

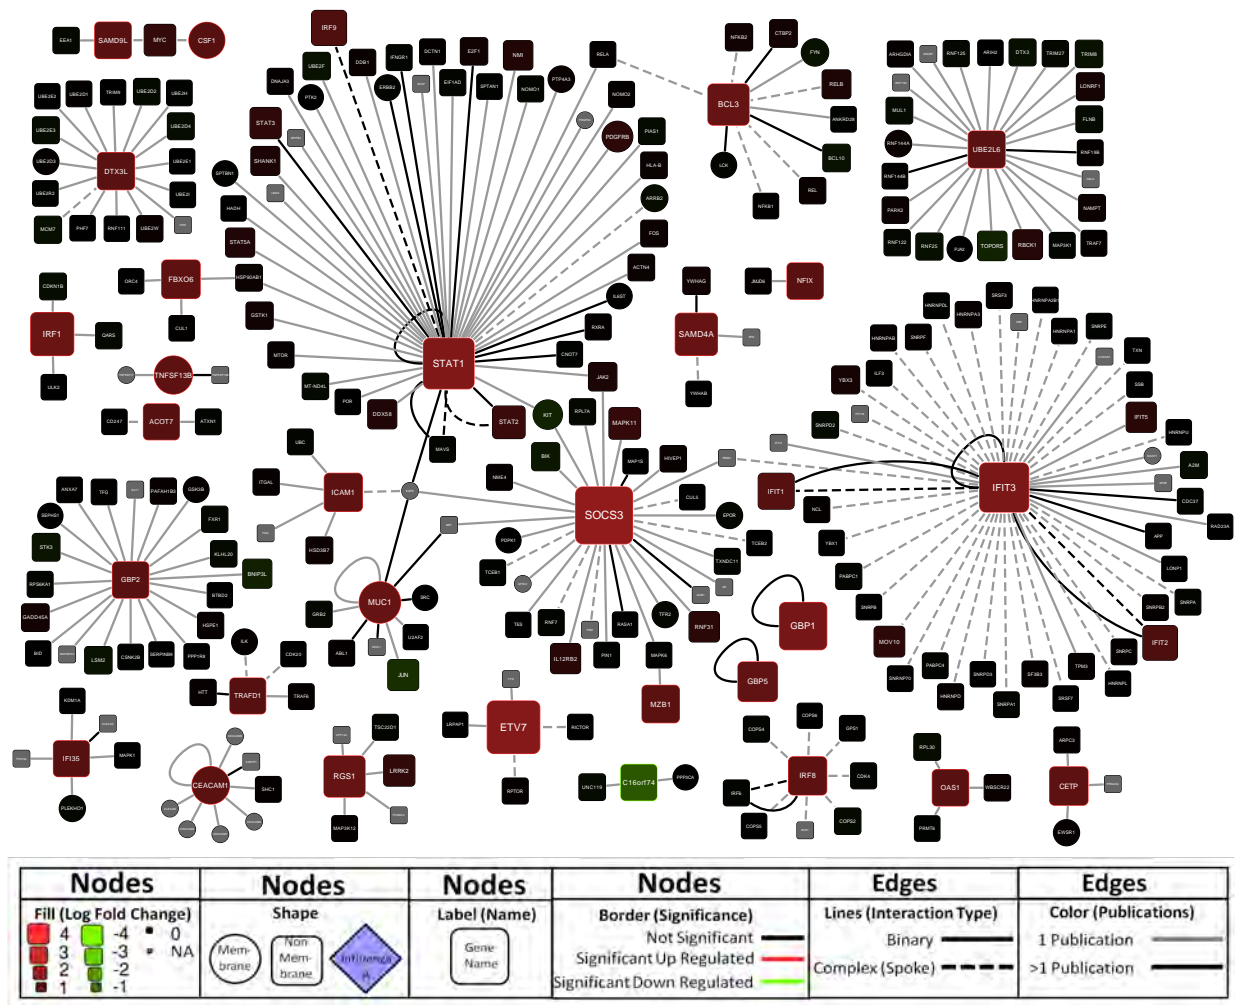

**Figure A146:** Integrated protein-protein interaction network based on significant genes (T-cells Day 1). Human-human and human-*Influenza A* experimental interactions for which one interacting partner is encoded by a significant gene.

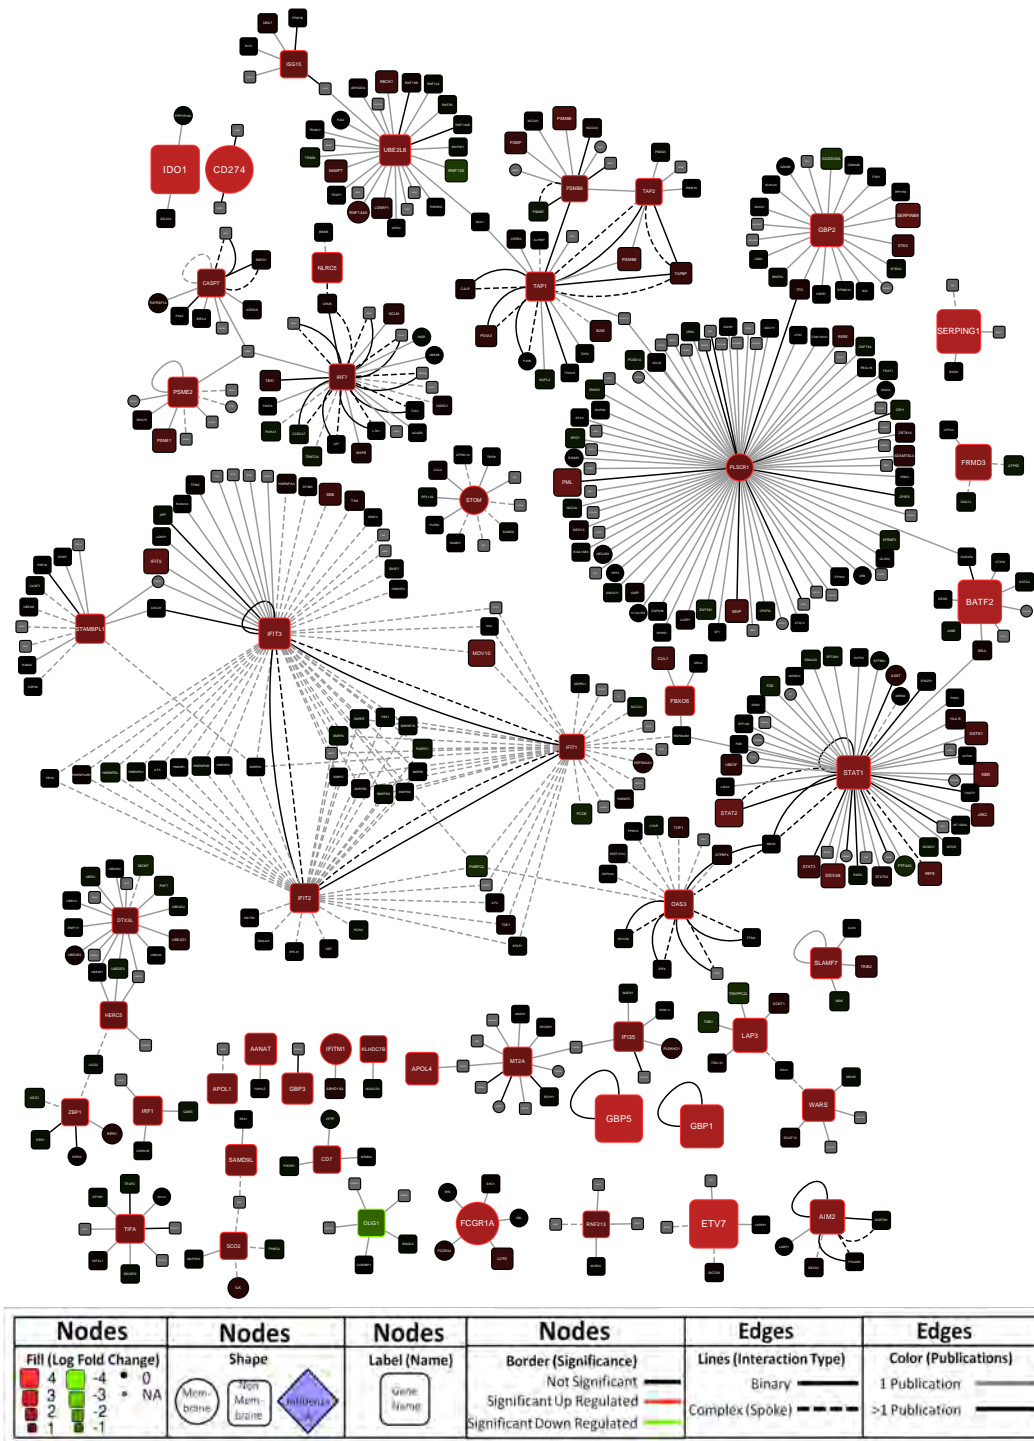

**Figure A147:** Integrated protein-protein interaction network based on overlapping significant genes at Day 1 (Dendritic cells, Monocytes, and Neutrophils). Human-human and human-*Influenza A* experimental interactions for which one interacting partner is encoded by a significant gene (human-human protein interactions are only shown if supported by at least two publications).

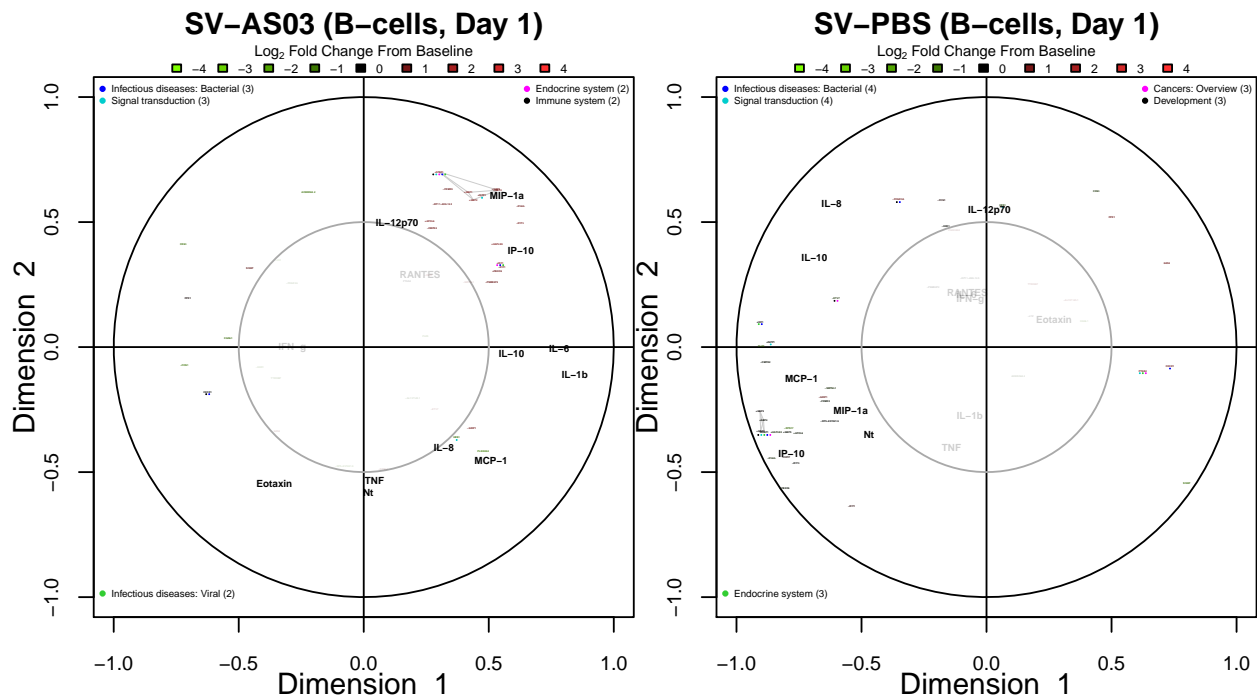

**Figure A148:** Canonical correlation plots (RNA-Seq, B-cells, Day 1). In black: IMO variables, green-red: gene variables color-coded by baseline fold change, +/- prefix: SDEG yes/no, colored-dots: pathway class, grey lines: robust clusters.

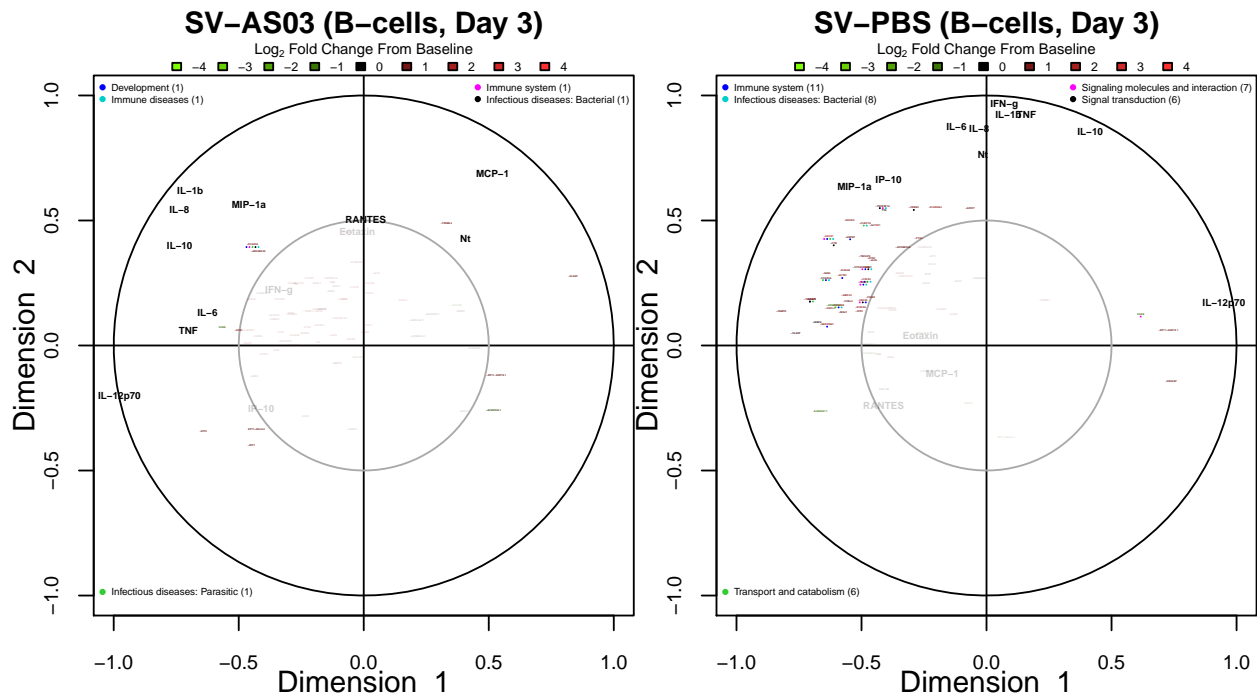

**Figure A149:** Canonical correlation plots (RNA-Seq, B-cells, Day 3). In black: IMO variables, green-red: gene variables color-coded by baseline fold change, +/- prefix: SDEG yes/no, colored-dots: pathway class, grey lines: robust clusters.

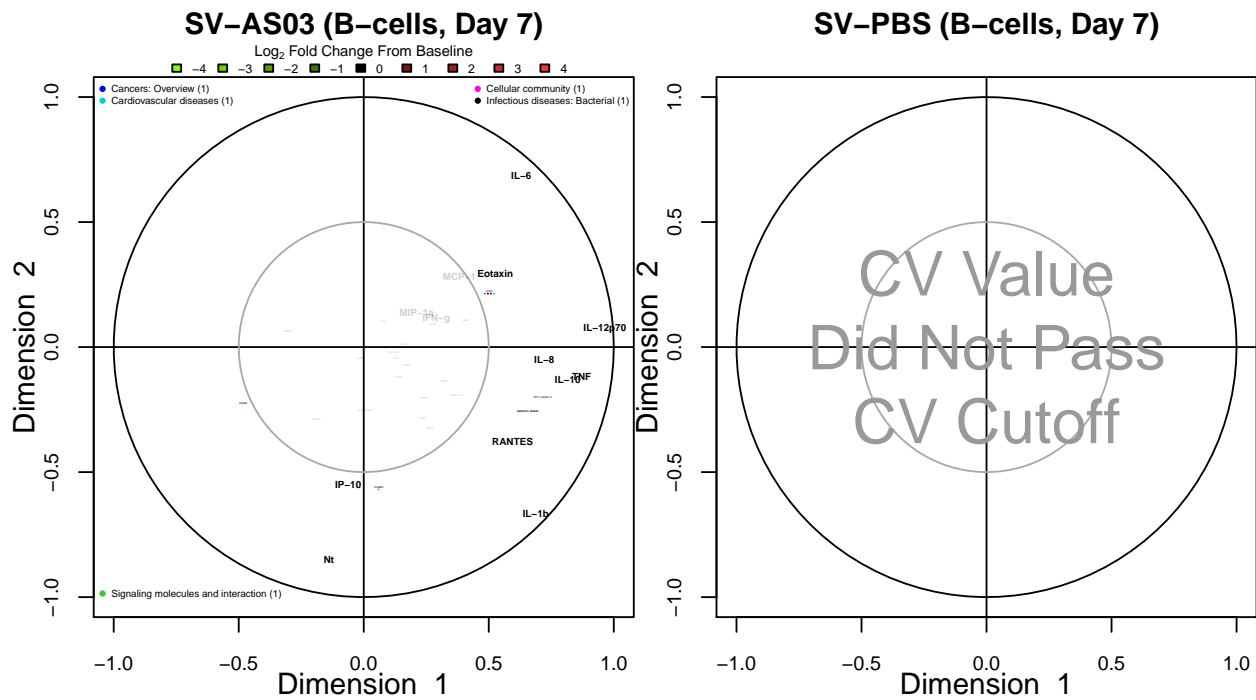

**Figure A150:** Canonical correlation plots (RNA-Seq, B-cells, Day 7). In black: IMO variables, green-red: gene variables color-coded by baseline fold change, +/- prefix: SDEG yes/no, colored-dots: pathway class, grey lines: robust clusters.

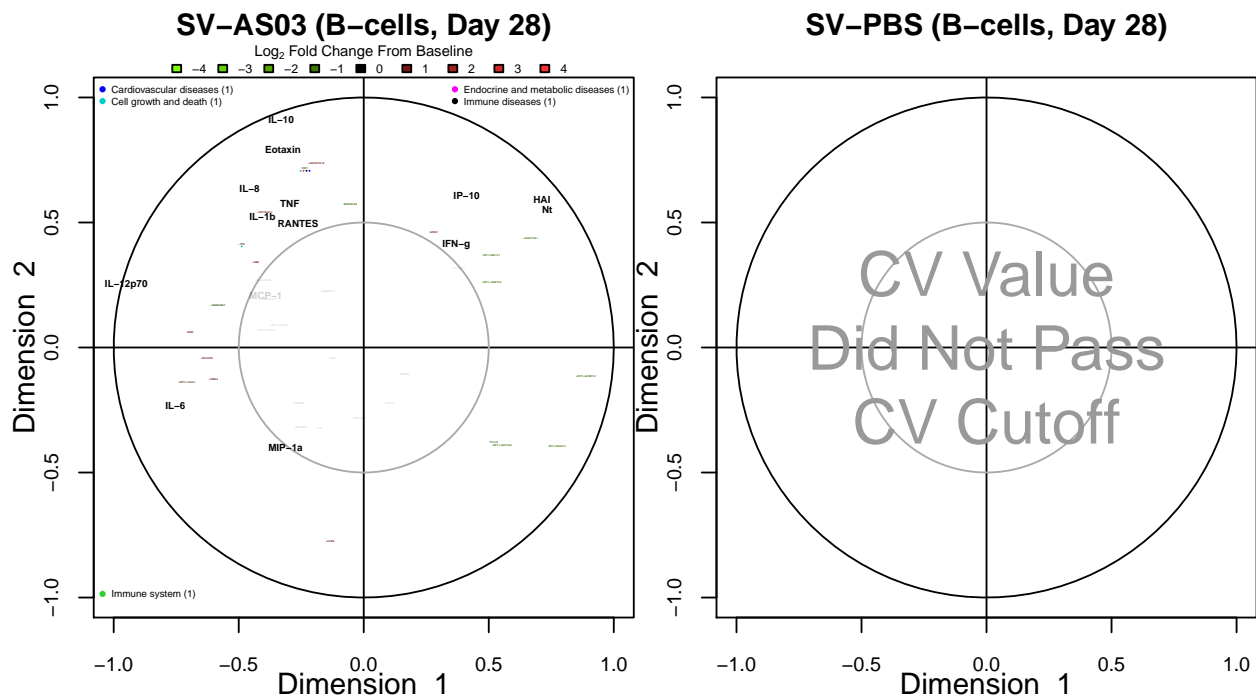

**Figure A151:** Canonical correlation plots (RNA-Seq, B-cells, Day 28). In black: IMO variables, green-red: gene variables color-coded by baseline fold change, +/- prefix: SDEG yes/no, colored-dots: pathway class, grey lines: robust clusters.

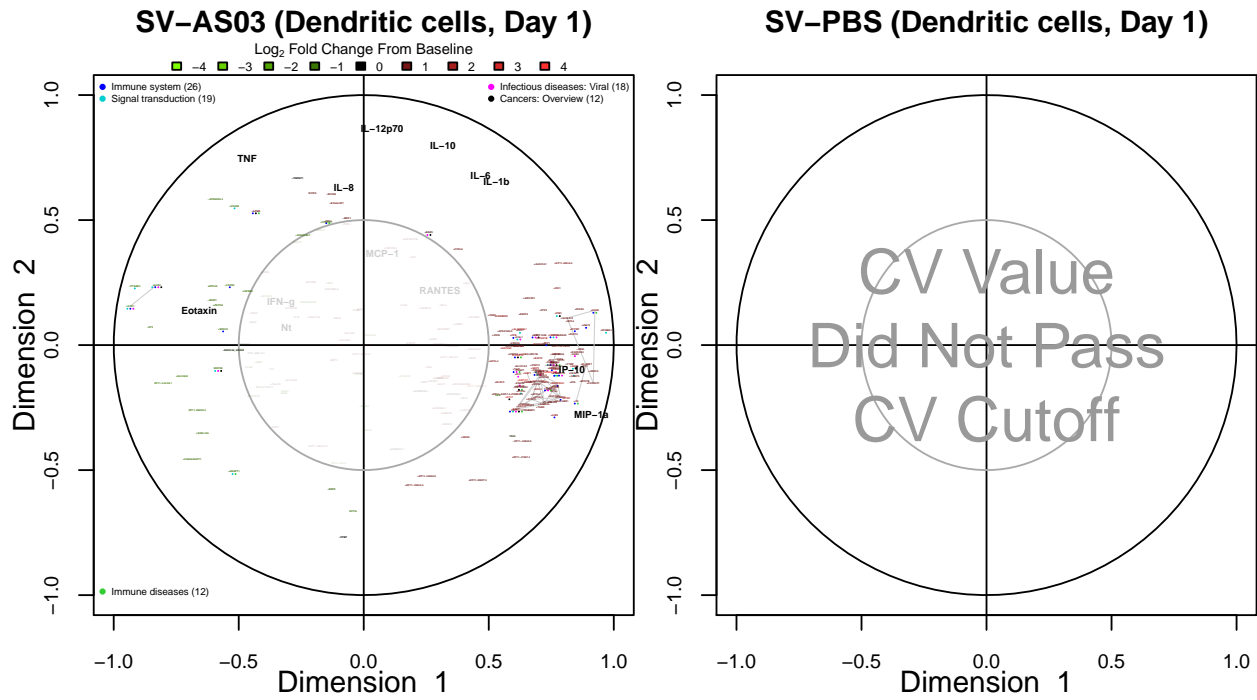

**Figure A152:** Canonical correlation plots (RNA-Seq, Dendritic cells, Day 1). In black: IMO variables, green-red: gene variables color-coded by baseline fold change, +/- prefix: SDEG yes/no, colored-dots: pathway class, grey lines: robust clusters.

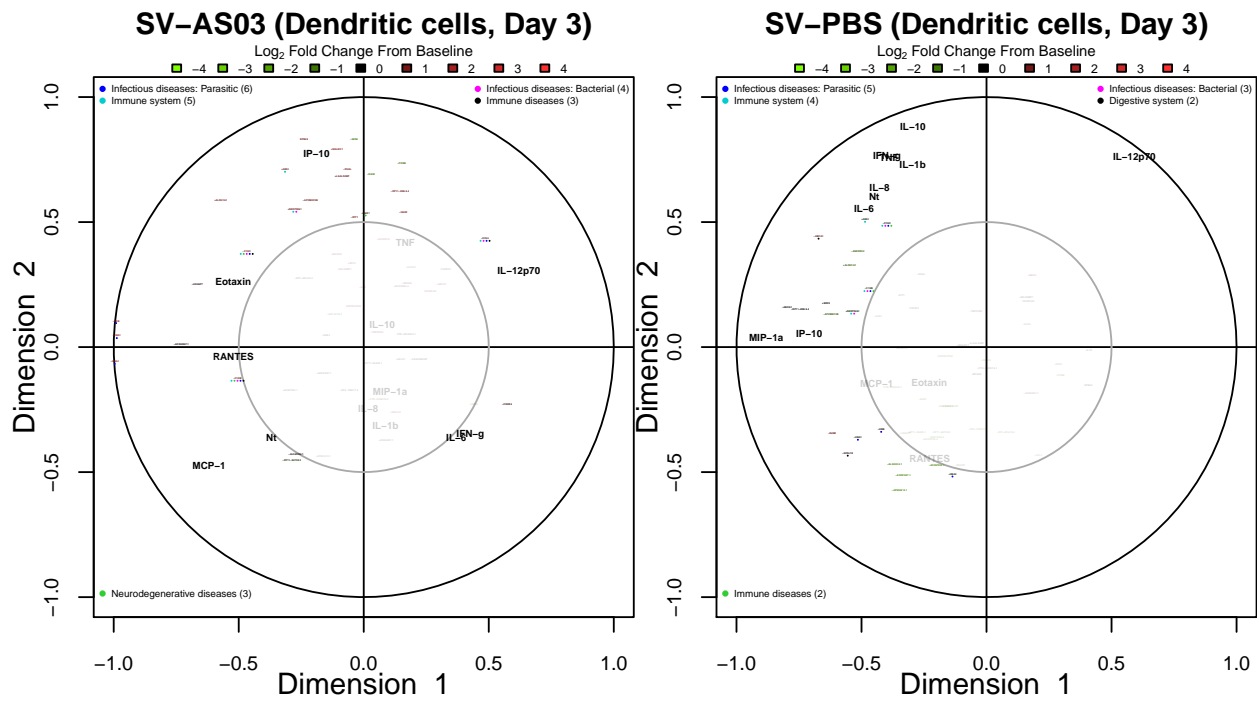

**Figure A153:** Canonical correlation plots (RNA-Seq, Dendritic cells, Day 3). In black: IMO variables, green-red: gene variables color-coded by baseline fold change, +/- prefix: SDEG yes/no, colored-dots: pathway class, grey lines: robust clusters.



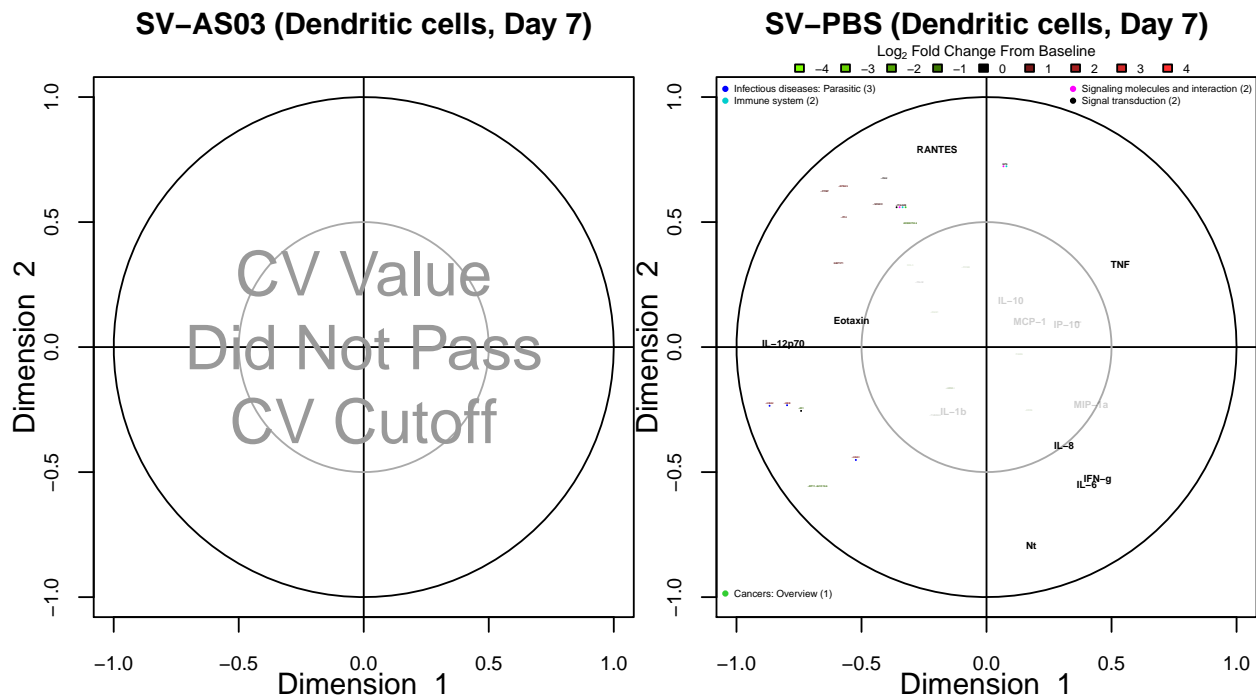

**Figure A154:** Canonical correlation plots (RNA-Seq, Dendritic cells, Day 7). In black: IMO variables, green-red: gene variables color-coded by baseline fold change, +/- prefix: SDEG yes/no, colored-dots: pathway class, grey lines: robust clusters.

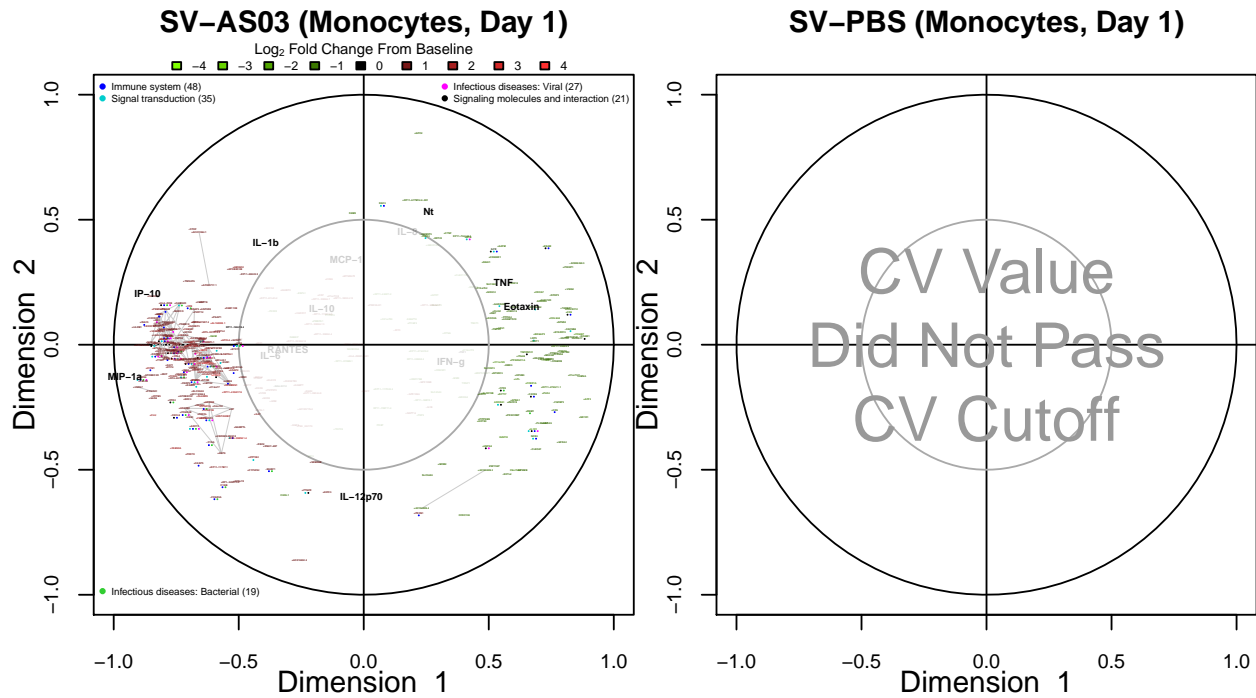

**Figure A155:** Canonical correlation plots (RNA-Seq, Monocytes, Day 1). In black: IMO variables, green-red: gene variables color-coded by baseline fold change, +/- prefix: SDEG yes/no, colored-dots: pathway class, grey lines: robust clusters.

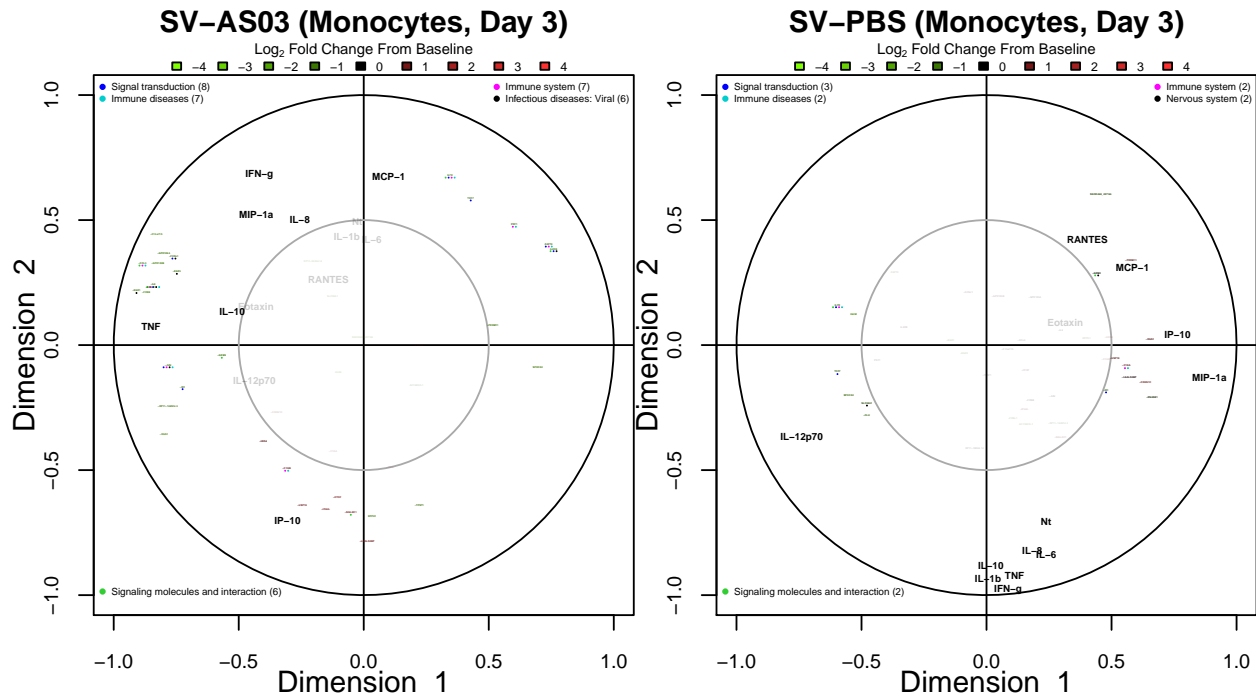

**Figure A156:** Canonical correlation plots (RNA-Seq, Monocytes, Day 3). In black: IMO variables, green-red: gene variables color-coded by baseline fold change, +/- prefix: SDEG yes/no, colored-dots: pathway class, grey lines: robust clusters.

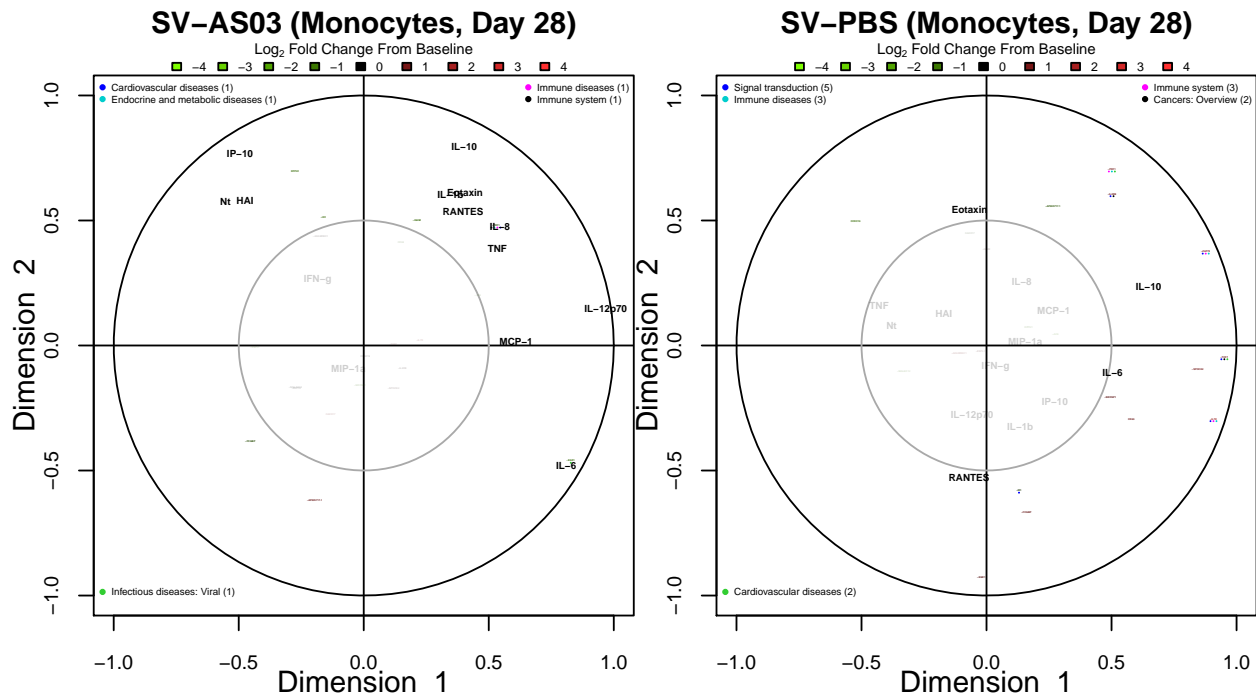

**Figure A157:** Canonical correlation plots (RNA-Seq, Monocytes, Day 28). In black: IMO variables, green-red: gene variables color-coded by baseline fold change, +/- prefix: SDEG yes/no, colored-dots: pathway class, grey lines: robust clusters.

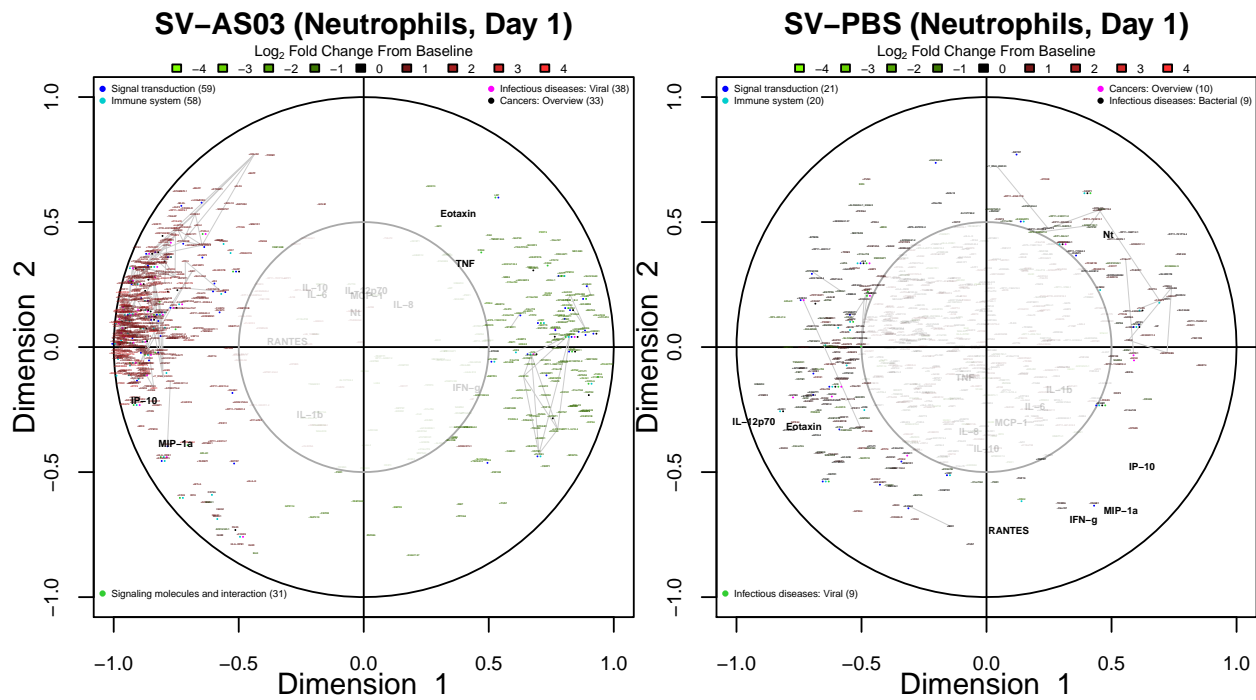

**Figure A158:** Canonical correlation plots (RNA-Seq, Neutrophils, Day 1). In black: IMO variables, green-red: gene variables color-coded by baseline fold change, +/- prefix: SDEG yes/no, colored-dots: pathway class, grey lines: robust clusters.

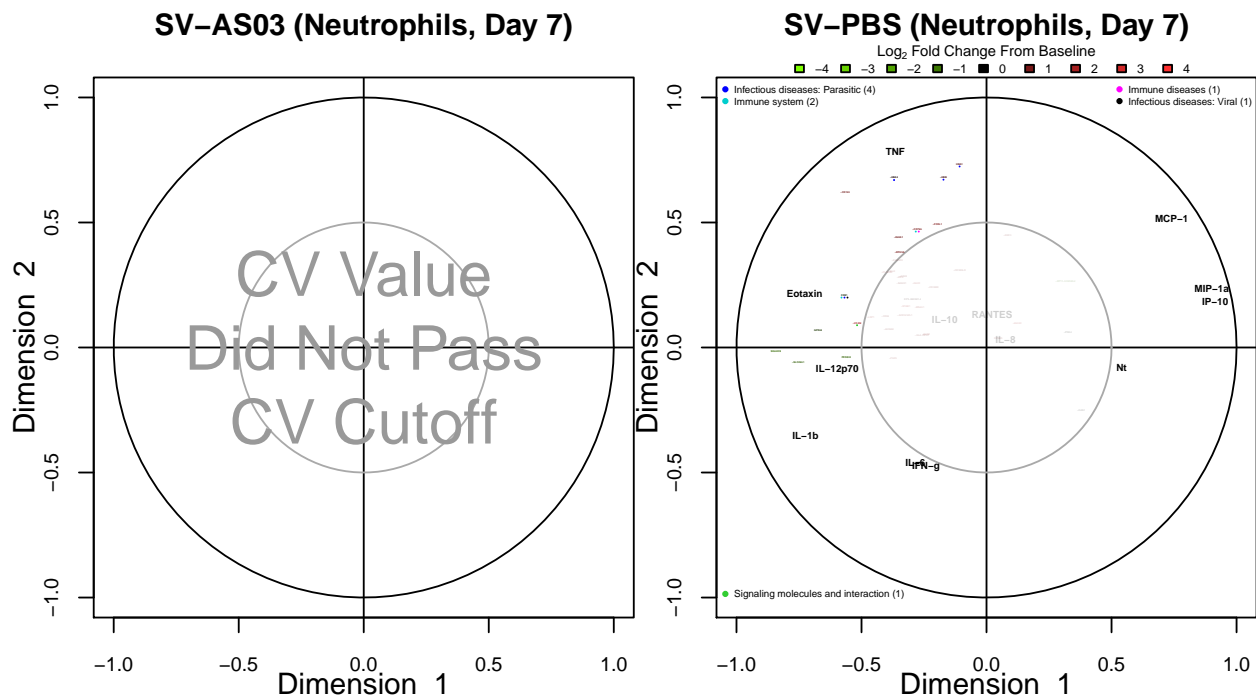

**Figure A159:** Canonical correlation plots (RNA-Seq, Neutrophils, Day 7). In black: IMO variables, green-red: gene variables color-coded by baseline fold change, +/- prefix: SDEG yes/no, colored-dots: pathway class, grey lines: robust clusters.

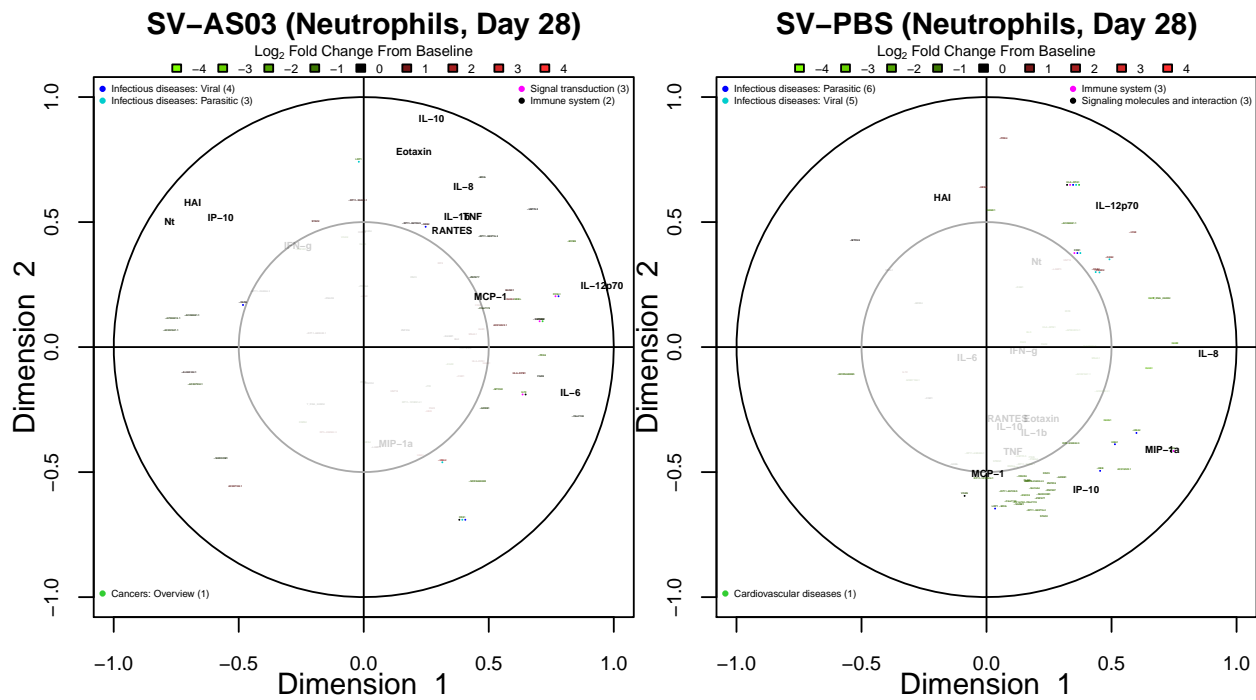

**Figure A160:** Canonical correlation plots (RNA-Seq, Neutrophils, Day 28). In black: IMO variables, green-red: gene variables color-coded by baseline fold change, +/- prefix: SDEG yes/no, colored-dots: pathway class, grey lines: robust clusters.

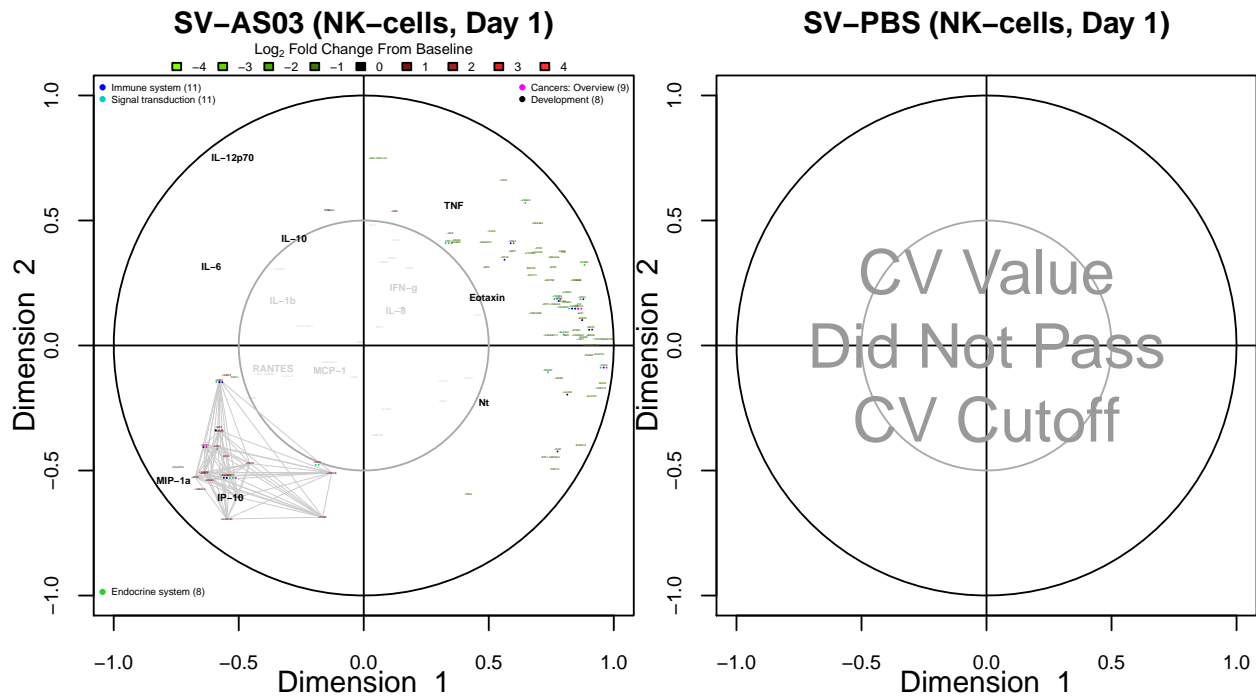

**Figure A161:** Canonical correlation plots (RNA-Seq, NK-cells, Day 1). In black: IMO variables, green-red: gene variables color-coded by baseline fold change, +/- prefix: SDEG yes/no, colored-dots: pathway class, grey lines: robust clusters.

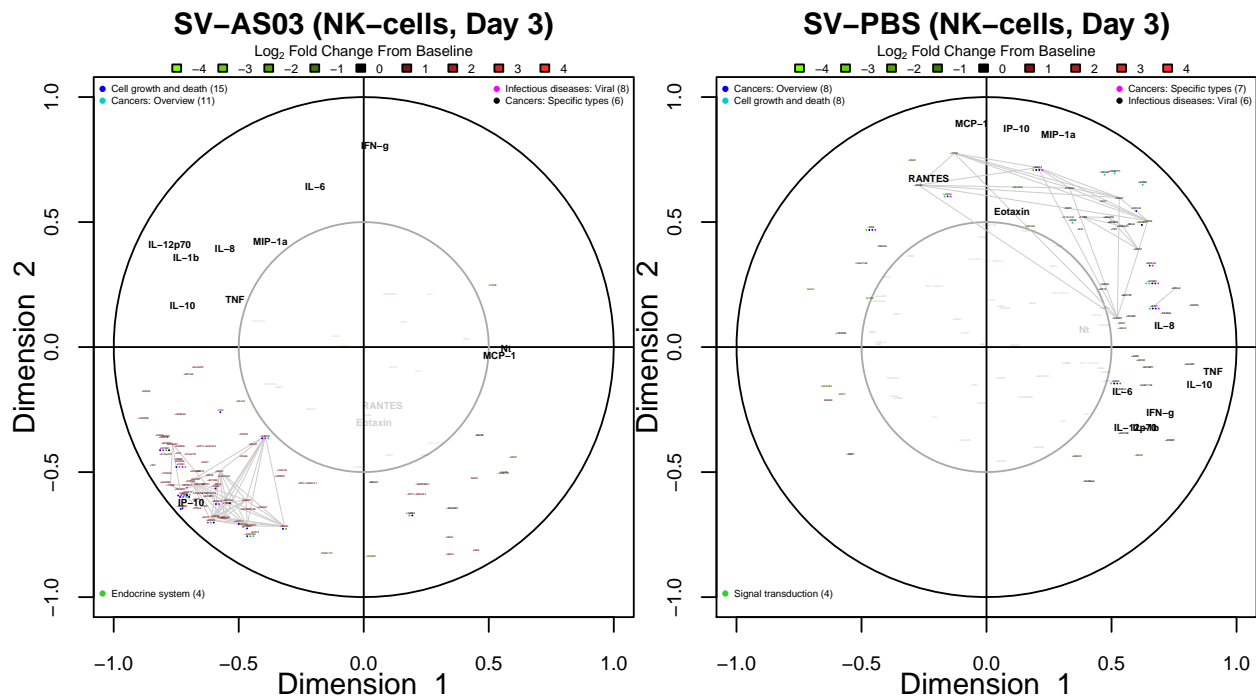

**Figure A162:** Canonical correlation plots (RNA-Seq, NK-cells, Day 3). In black: IMO variables, green-red: gene variables color-coded by baseline fold change, +/- prefix: SDEG yes/no, colored-dots: pathway class, grey lines: robust clusters.

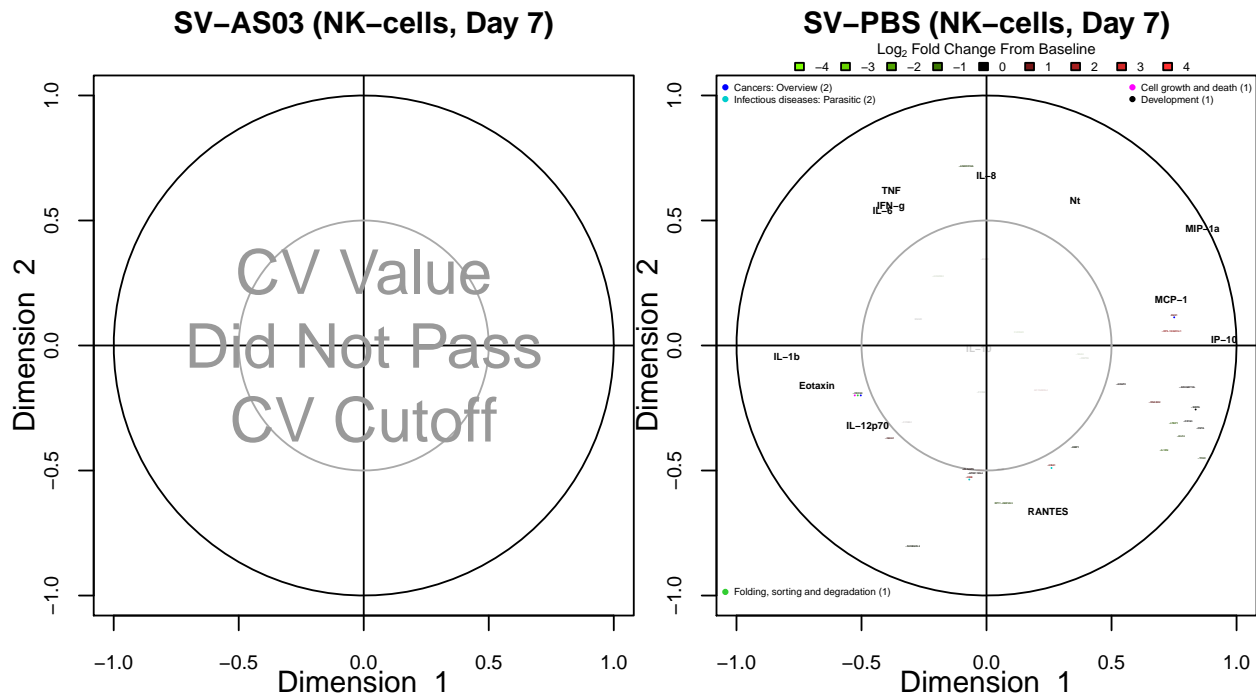

**Figure A163:** Canonical correlation plots (RNA-Seq, NK-cells, Day 7). In black: IMO variables, green-red: gene variables color-coded by baseline fold change, +/- prefix: SDEG yes/no, colored-dots: pathway class, grey lines: robust clusters.

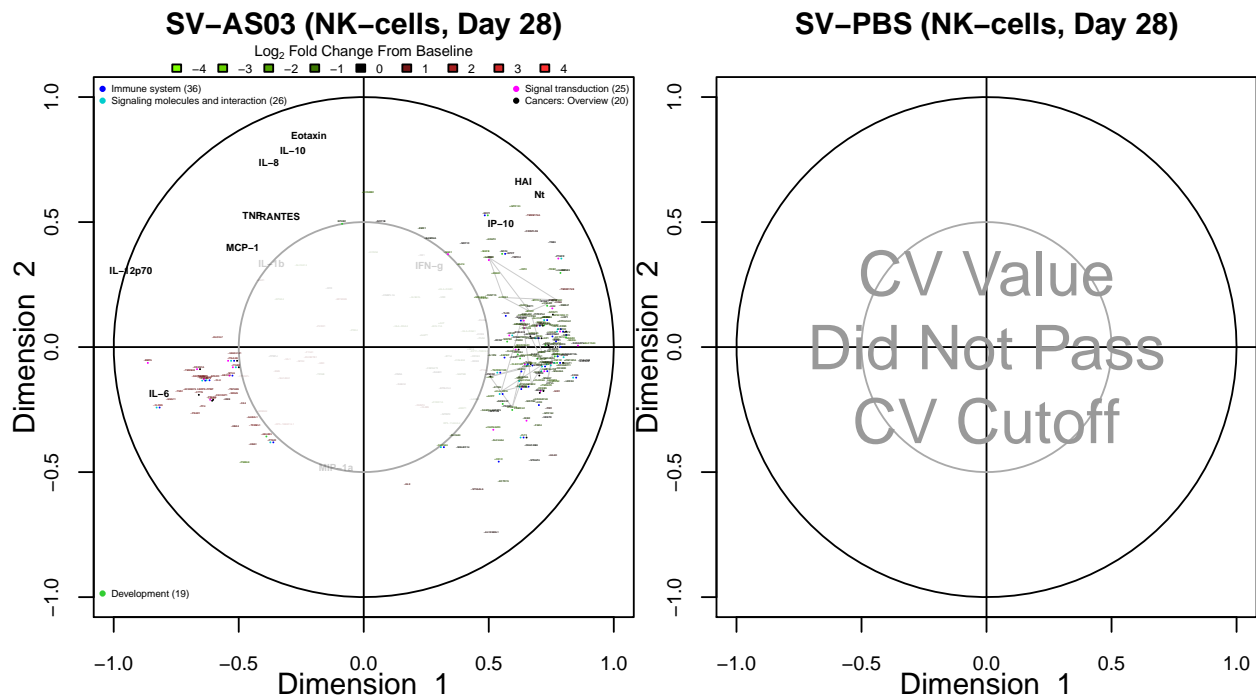

**Figure A164:** Canonical correlation plots (RNA-Seq, NK-cells, Day 28). In black: IMO variables, green-red: gene variables color-coded by baseline fold change, +/- prefix: SDEG yes/no, colored-dots: pathway class, grey lines: robust clusters.

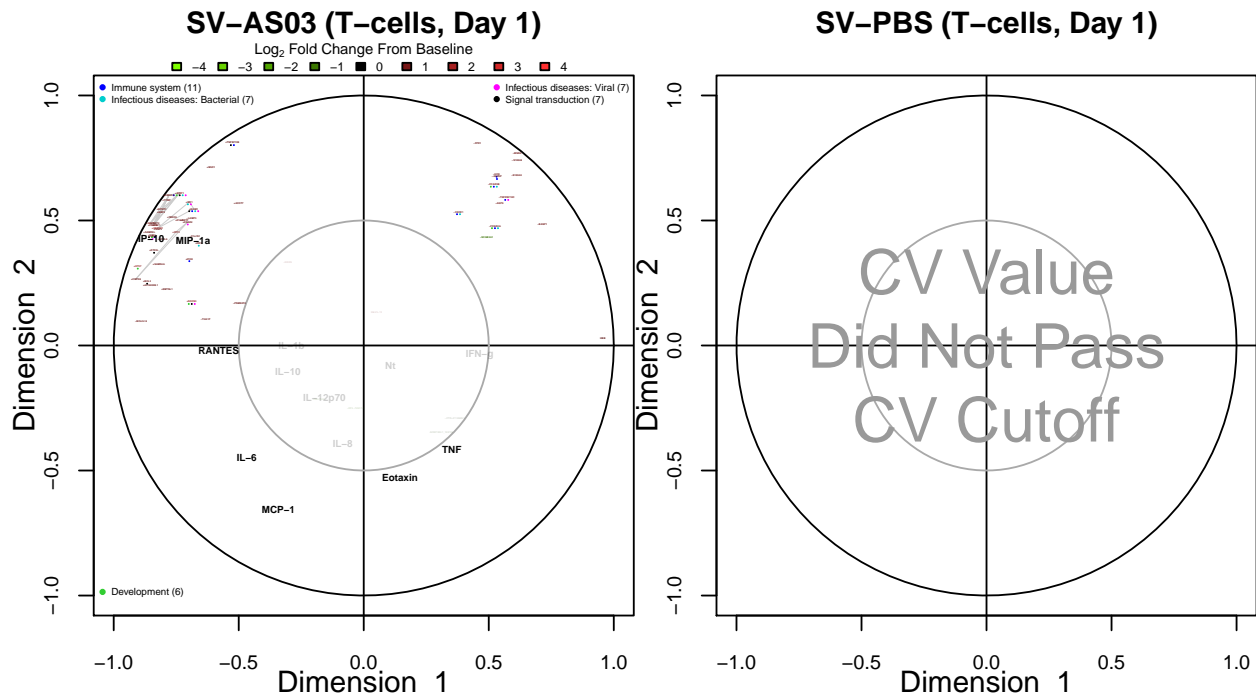

**Figure A165:** Canonical correlation plots (RNA-Seq, T-cells, Day 1). In black: IMO variables, green-red: gene variables color-coded by baseline fold change, +/- prefix: SDEG yes/no, colored-dots: pathway class, grey lines: robust clusters.

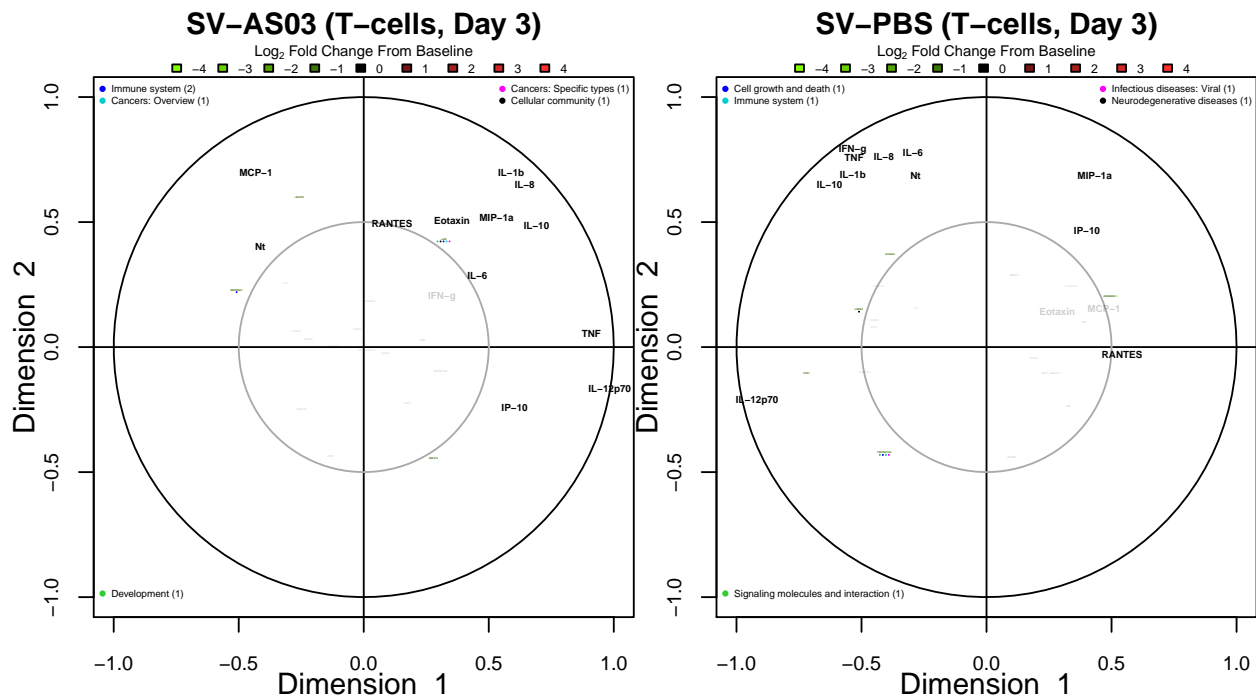

**Figure A166:** Canonical correlation plots (RNA-Seq, T-cells, Day 3). In black: IMO variables, green-red: gene variables color-coded by baseline fold change, +/- prefix: SDEG yes/no, colored-dots: pathway class, grey lines: robust clusters.

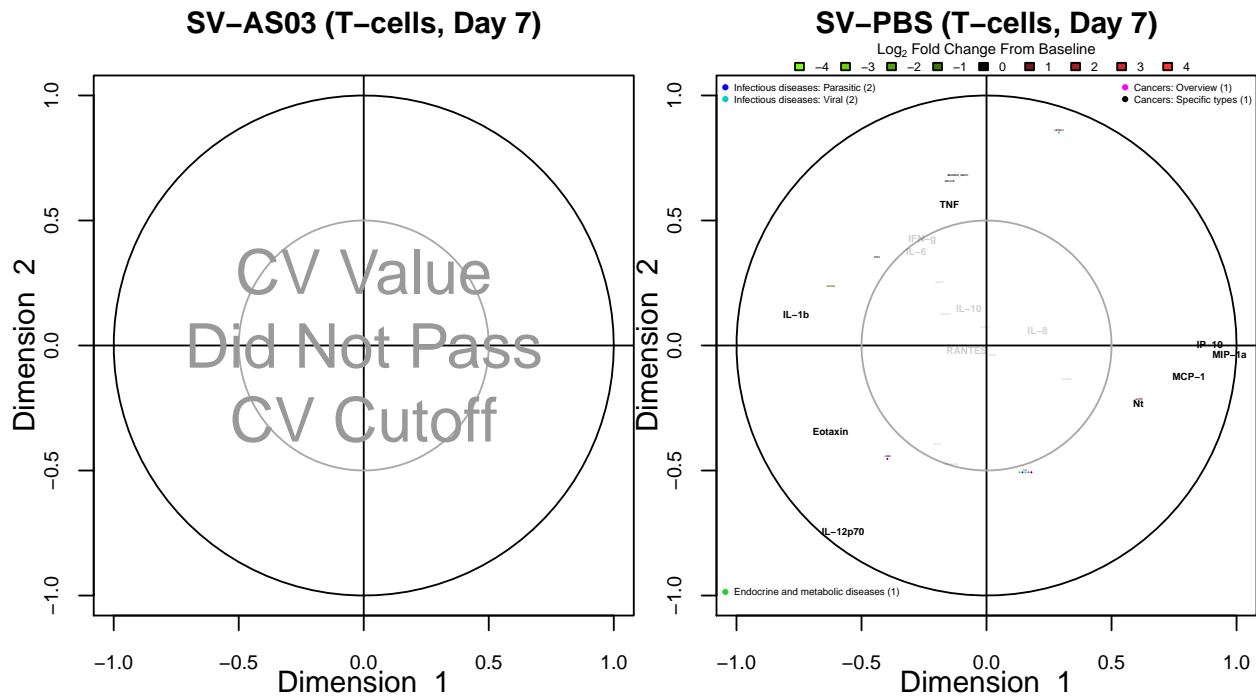

**Figure A167:** Canonical correlation plots (RNA-Seq, T-cells, Day 7). In black: IMO variables, green-red: gene variables color-coded by baseline fold change, +/- prefix: SDEG yes/no, colored-dots: pathway class, grey lines: robust clusters.

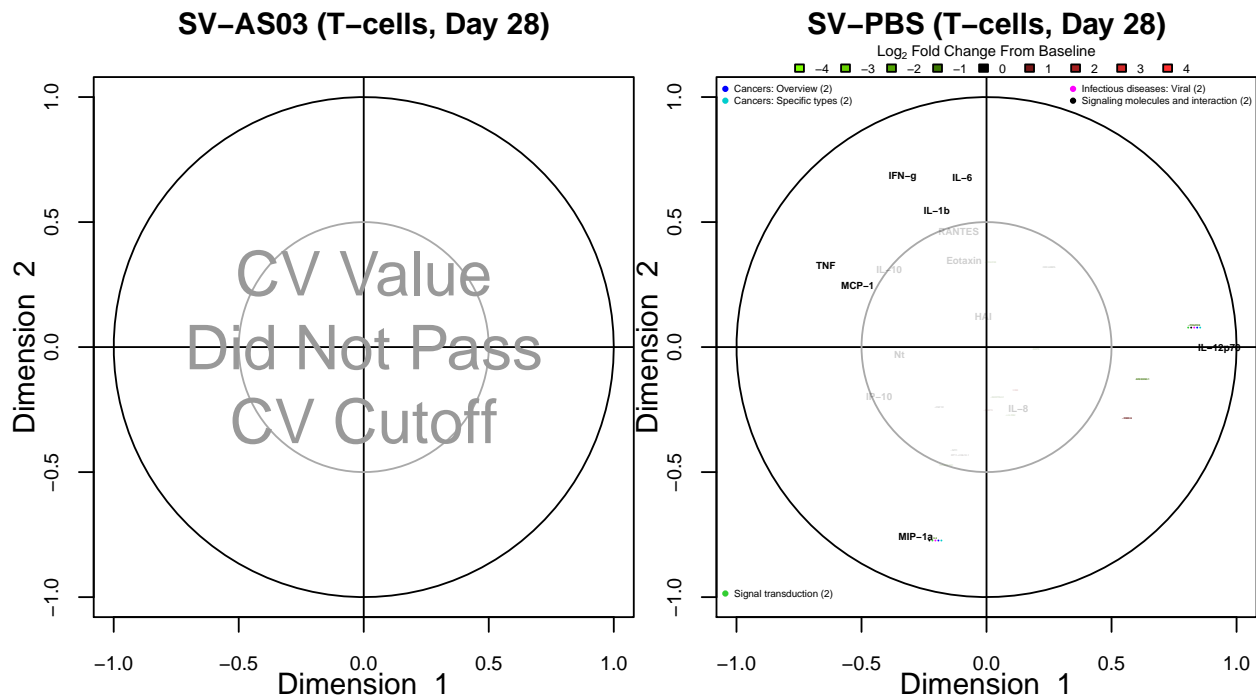

**Figure A168:** Canonical correlation plots (RNA-Seq, T-cells, Day 28). In black: IMO variables, green-red: gene variables color-coded by baseline fold change, +/- prefix: SDEG yes/no, colored-dots: pathway class, grey lines: robust clusters.

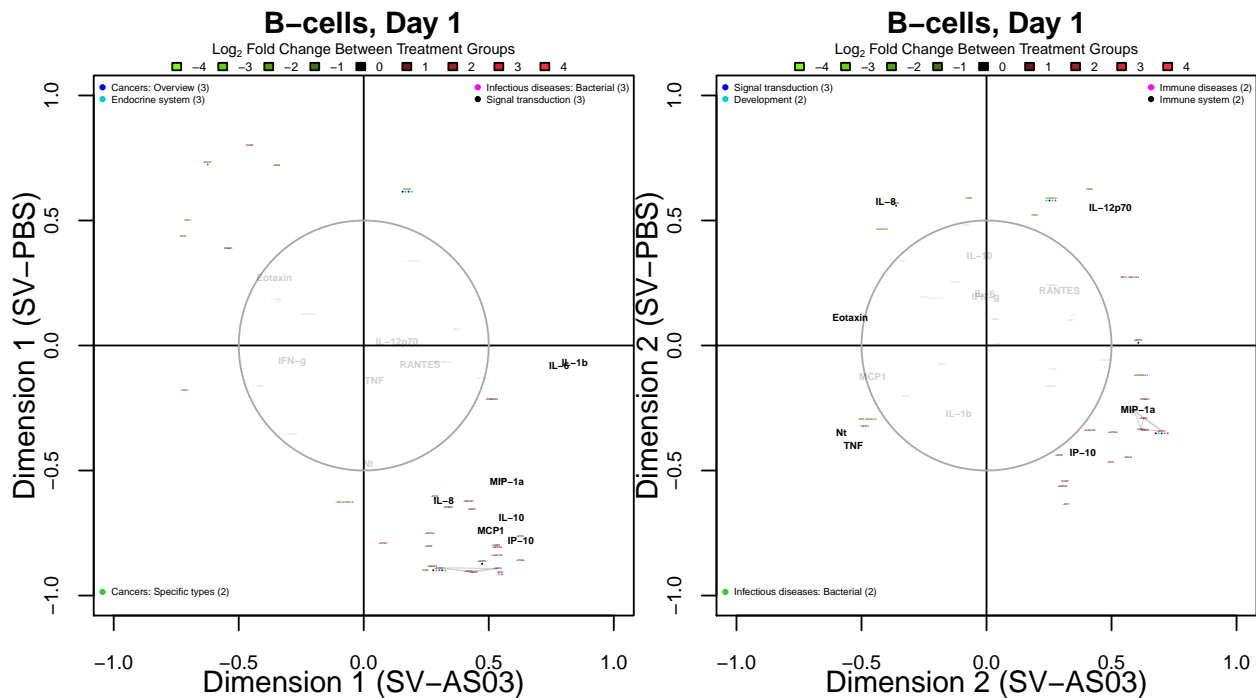

**Figure A169:** Canonical correlation plots (RNA-Seq, B-cells, Day 1, SV-AS03 vs. SV-PBS). In black: IMO variables, green-red: gene variables color-coded by vaccine group fold change difference (LFCD), +/- prefix: SDEG yes/no, colored-dots: pathway class, grey lines: robust clusters.



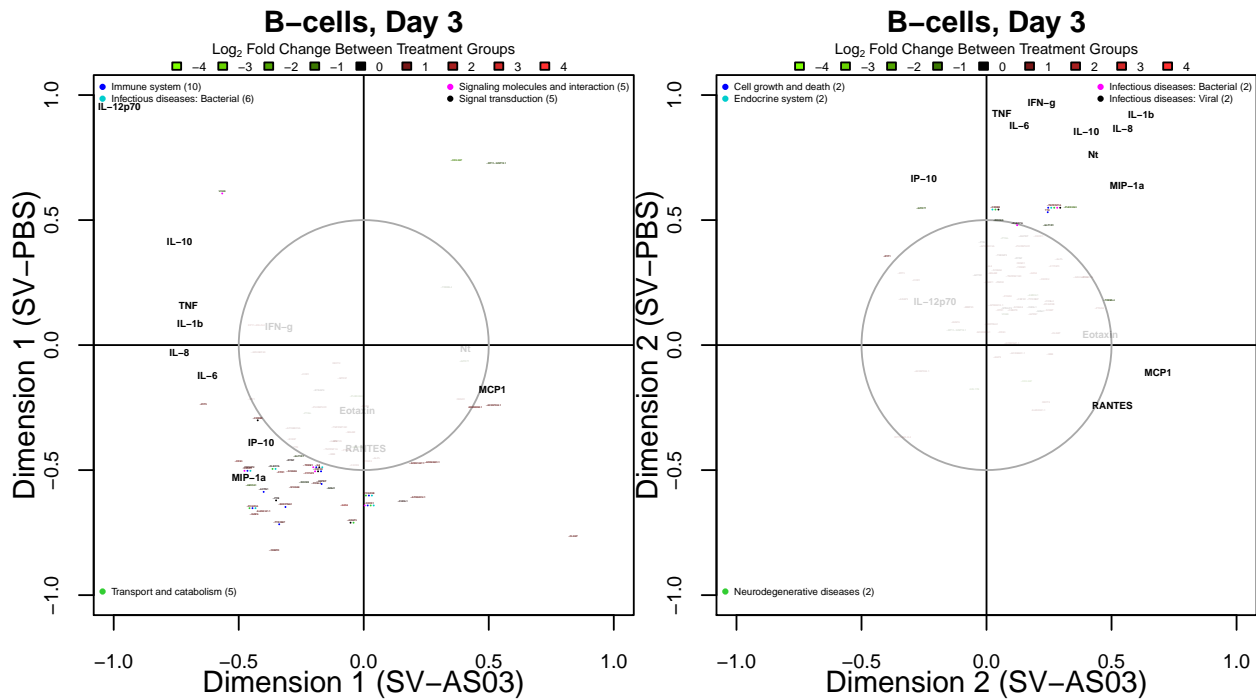

**Figure A170:** Canonical correlation plots (RNA-Seq, B-cells, Day 3, SV-AS03 vs. SV-PBS). In black: IMO variables, green-red: gene variables color-coded by vaccine group fold change difference (LFCD), +/- prefix: SDEG yes/no, colored-dots: pathway class, grey lines: robust clusters.

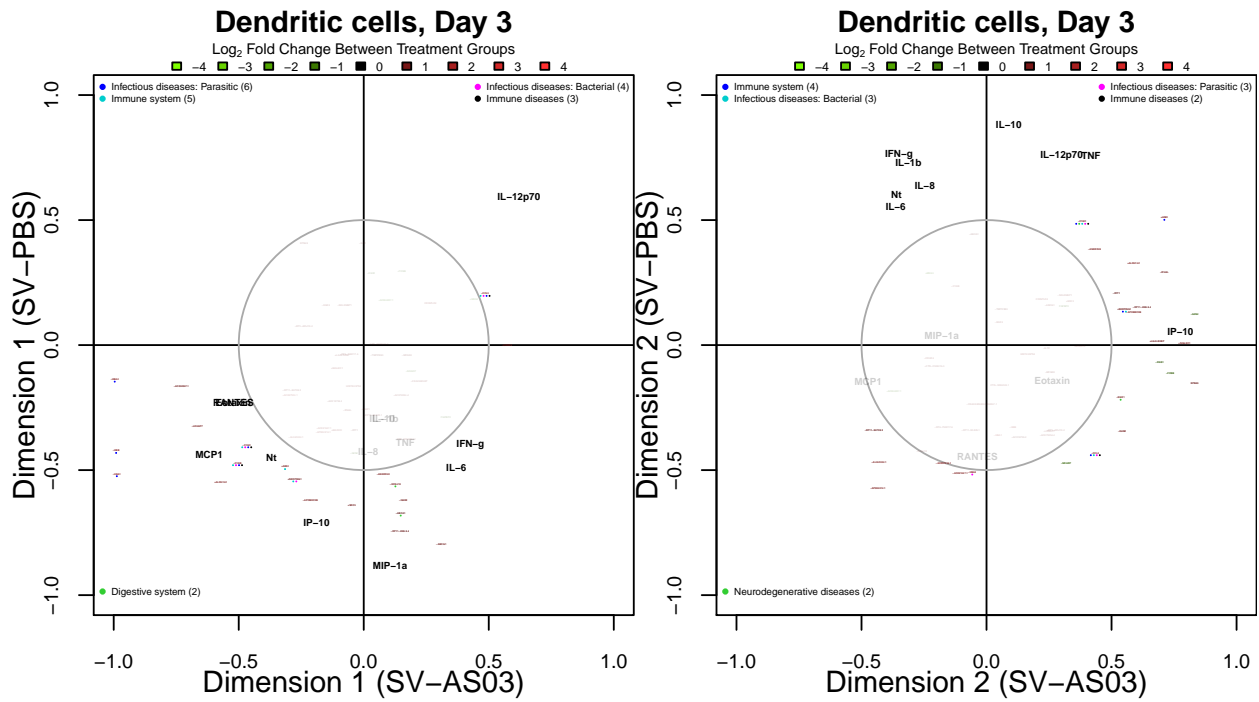

**Figure A171:** Canonical correlation plots (RNA-Seq, Dendritic cells, Day 3, SV-AS03 vs. SV-PBS). In black: IMO variables, green-red: gene variables color-coded by vaccine group fold change difference (LFCD), +/- prefix: SDEG yes/no, colored-dots: pathway class, grey lines: robust clusters.

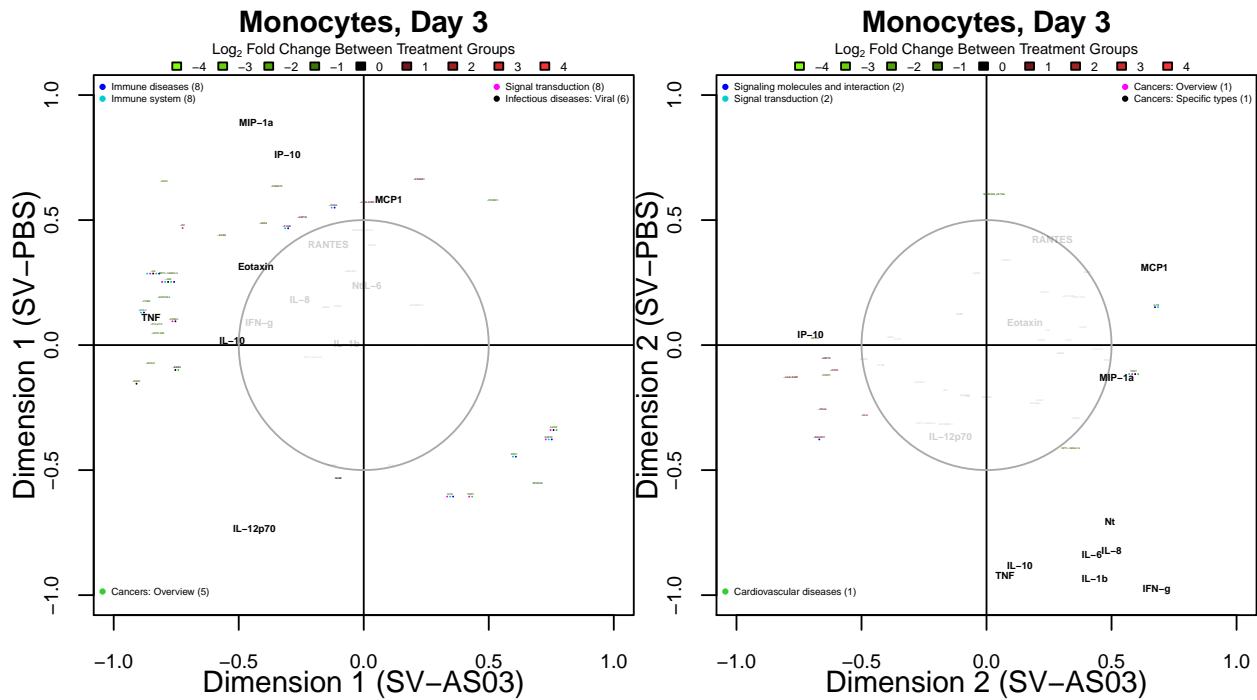

**Figure A172:** Canonical correlation plots (RNA-Seq, Monocytes, Day 3, SV-AS03 vs. SV-PBS). In black: IMO variables, green-red: gene variables color-coded by vaccine group fold change difference (LFCD), +/- prefix: SDEG yes/no, colored-dots: pathway class, grey lines: robust clusters.

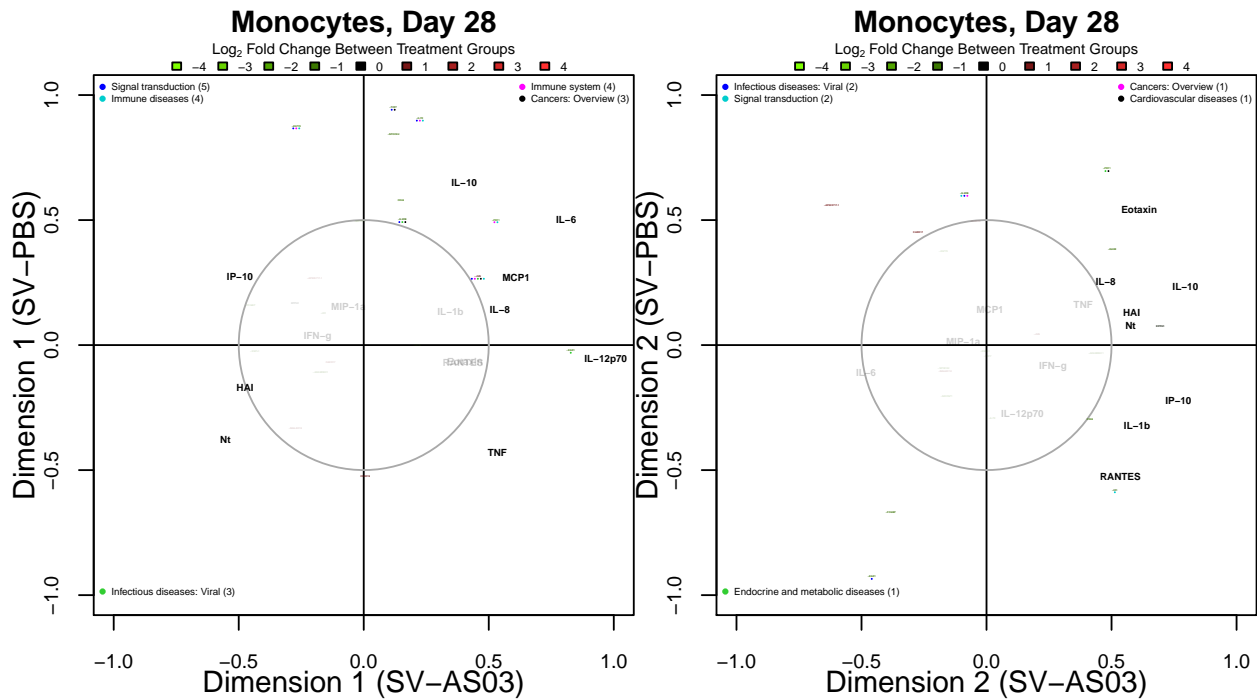

**Figure A173:** Canonical correlation plots (RNA-Seq, Monocytes, Day 28, SV-AS03 vs. SV-PBS). In black: IMO variables, green-red: gene variables color-coded by vaccine group fold change difference (LFCD), +/- prefix: SDEG yes/no, colored-dots: pathway class, grey lines: robust clusters.

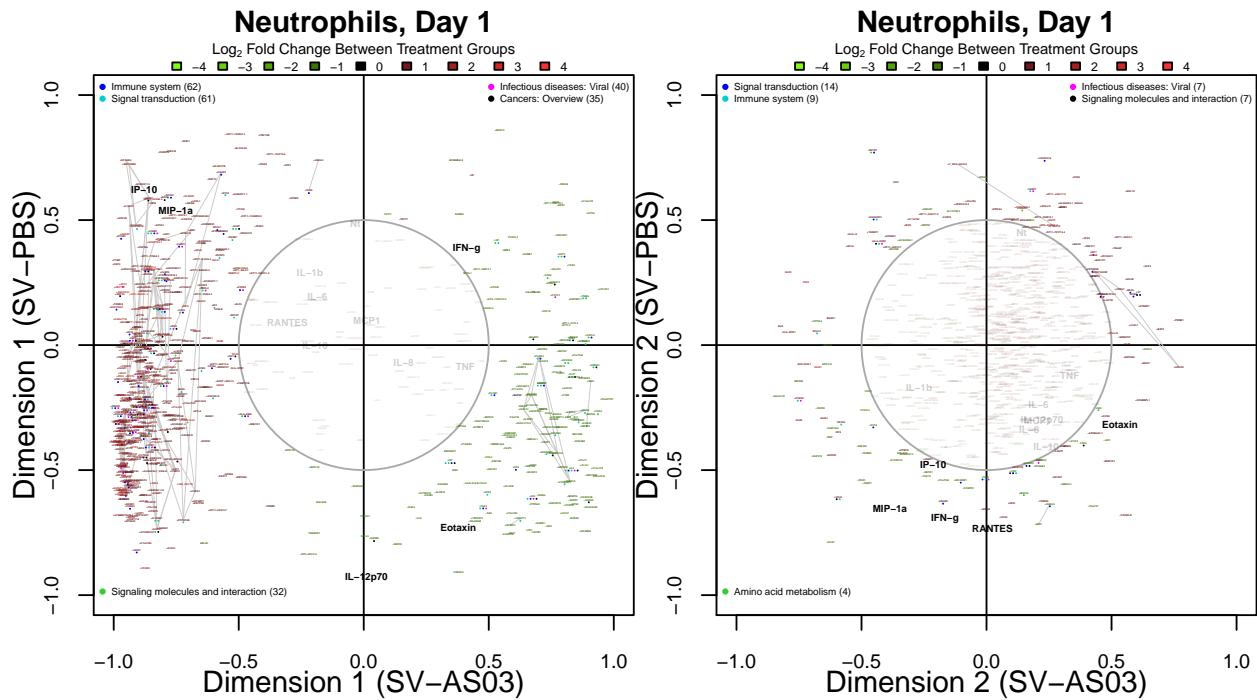

**Figure A174:** Canonical correlation plots (RNA-Seq, Neutrophils, Day 1, SV-AS03 vs. SV-PBS). In black: IMO variables, green-red: gene variables color-coded by vaccine group fold change difference (LFCD), +/- prefix: SDEG yes/no, colored-dots: pathway class, grey lines: robust clusters.

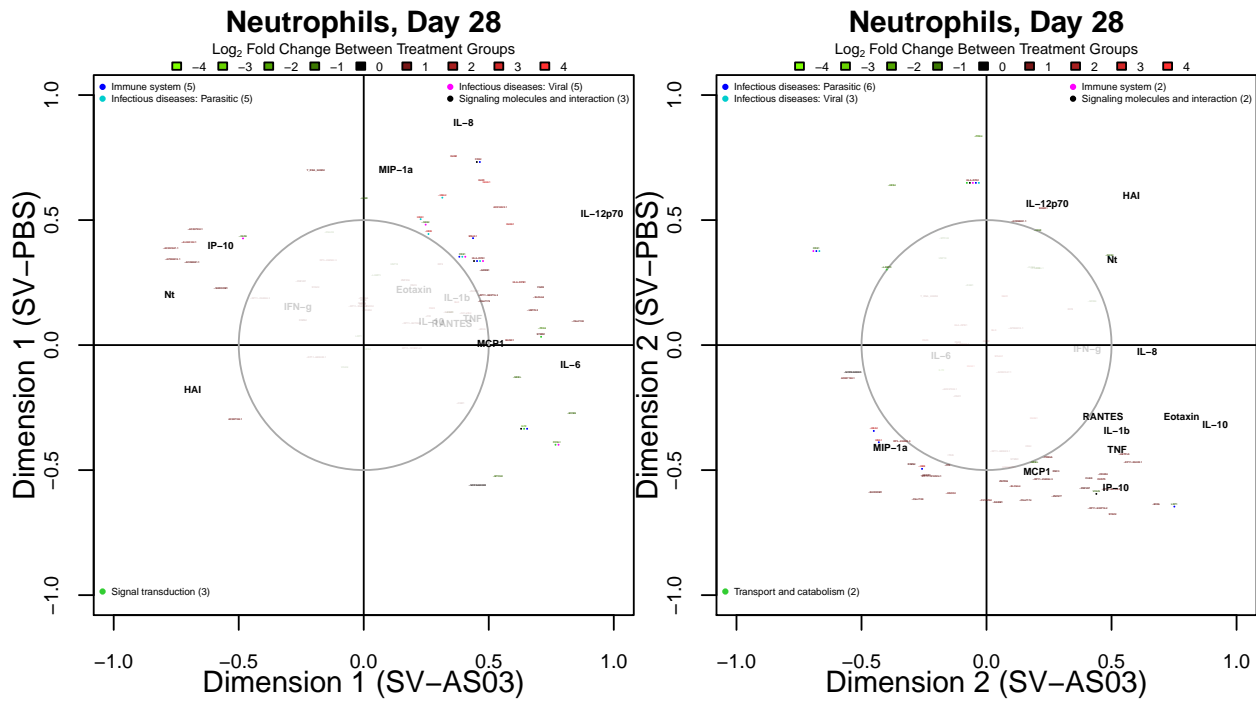

**Figure A175:** Canonical correlation plots (RNA-Seq, Neutrophils, Day 28, SV-AS03 vs. SV-PBS). In black: IMO variables, green-red: gene variables color-coded by vaccine group fold change difference (LFCD), +/- prefix: SDEG yes/no, colored-dots: pathway class, grey lines: robust clusters.

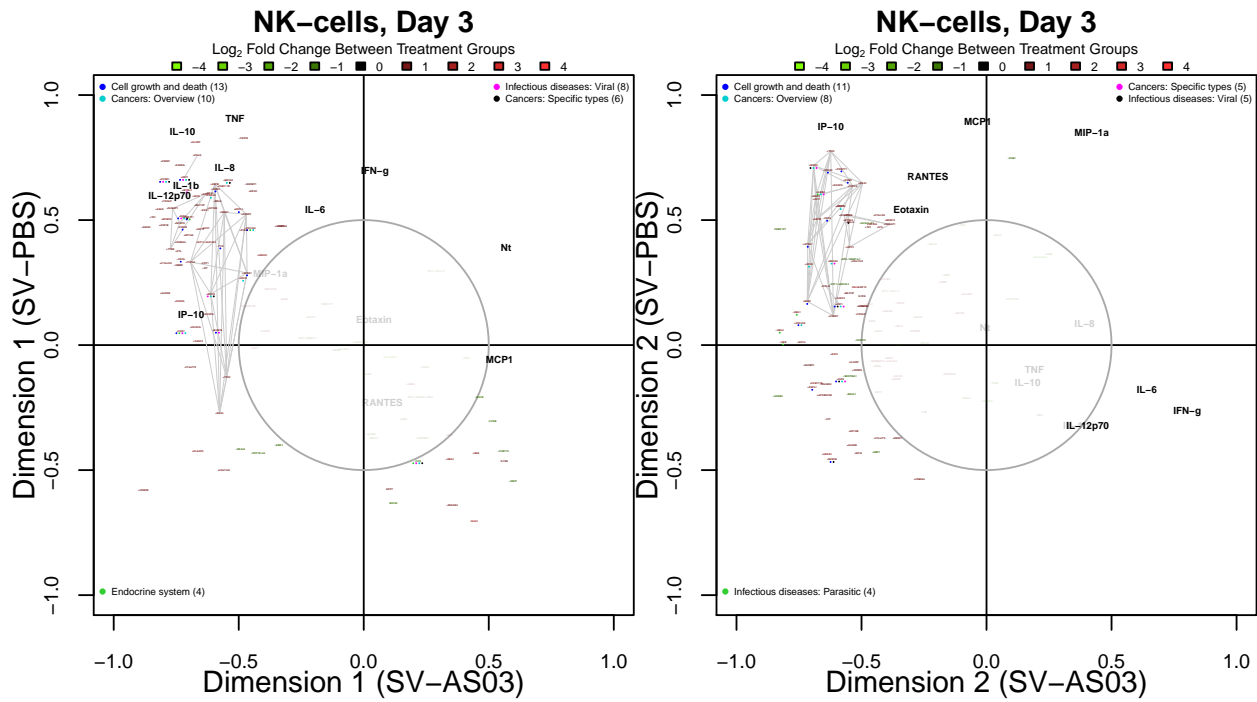

**Figure A176:** Canonical correlation plots (RNA-Seq, NK-cells, Day 3, SV-AS03 vs. SV-PBS). In black: IMO variables, green-red: gene variables color-coded by vaccine group fold change difference (LFCD), +/- prefix: SDEG yes/no, colored-dots: pathway class, grey lines: robust clusters.

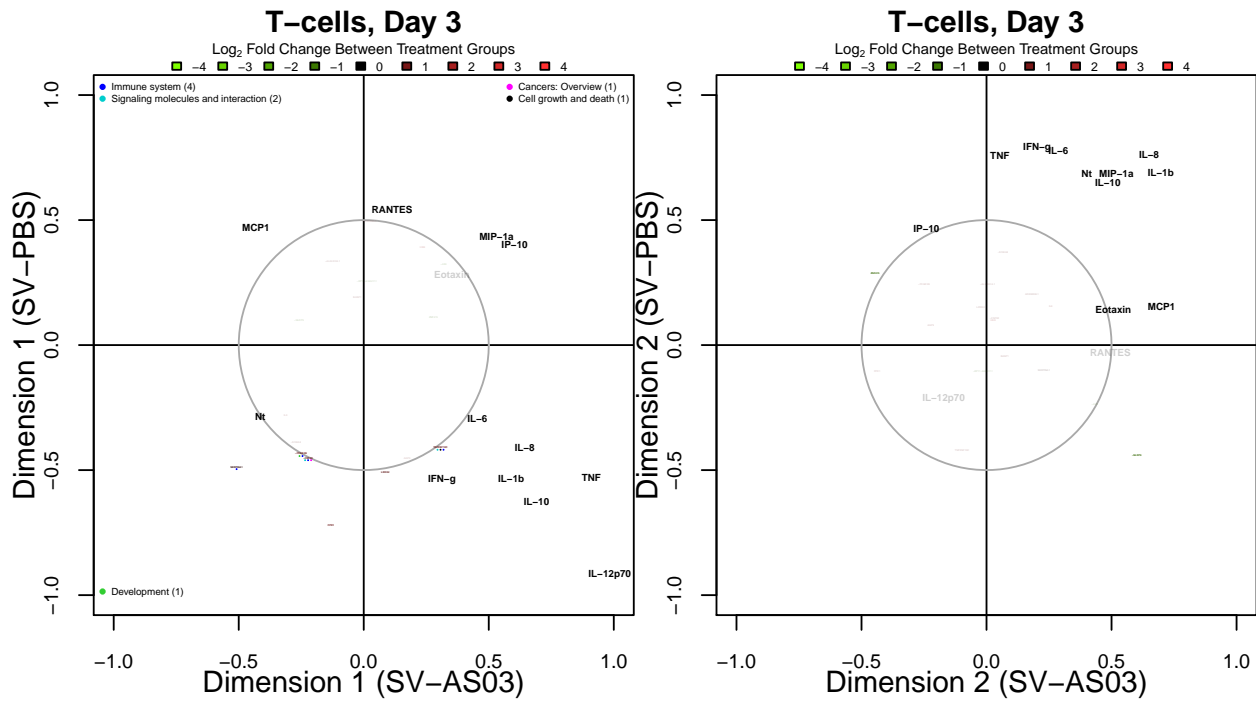

**Figure A177:** Canonical correlation plots (RNA-Seq, T-cells, Day 3, SV-AS03 vs. SV-PBS). In black: IMO variables, green-red: gene variables color-coded by vaccine group fold change difference (LFCD), +/- prefix: SDEG yes/no, colored-dots: pathway class, grey lines: robust clusters.



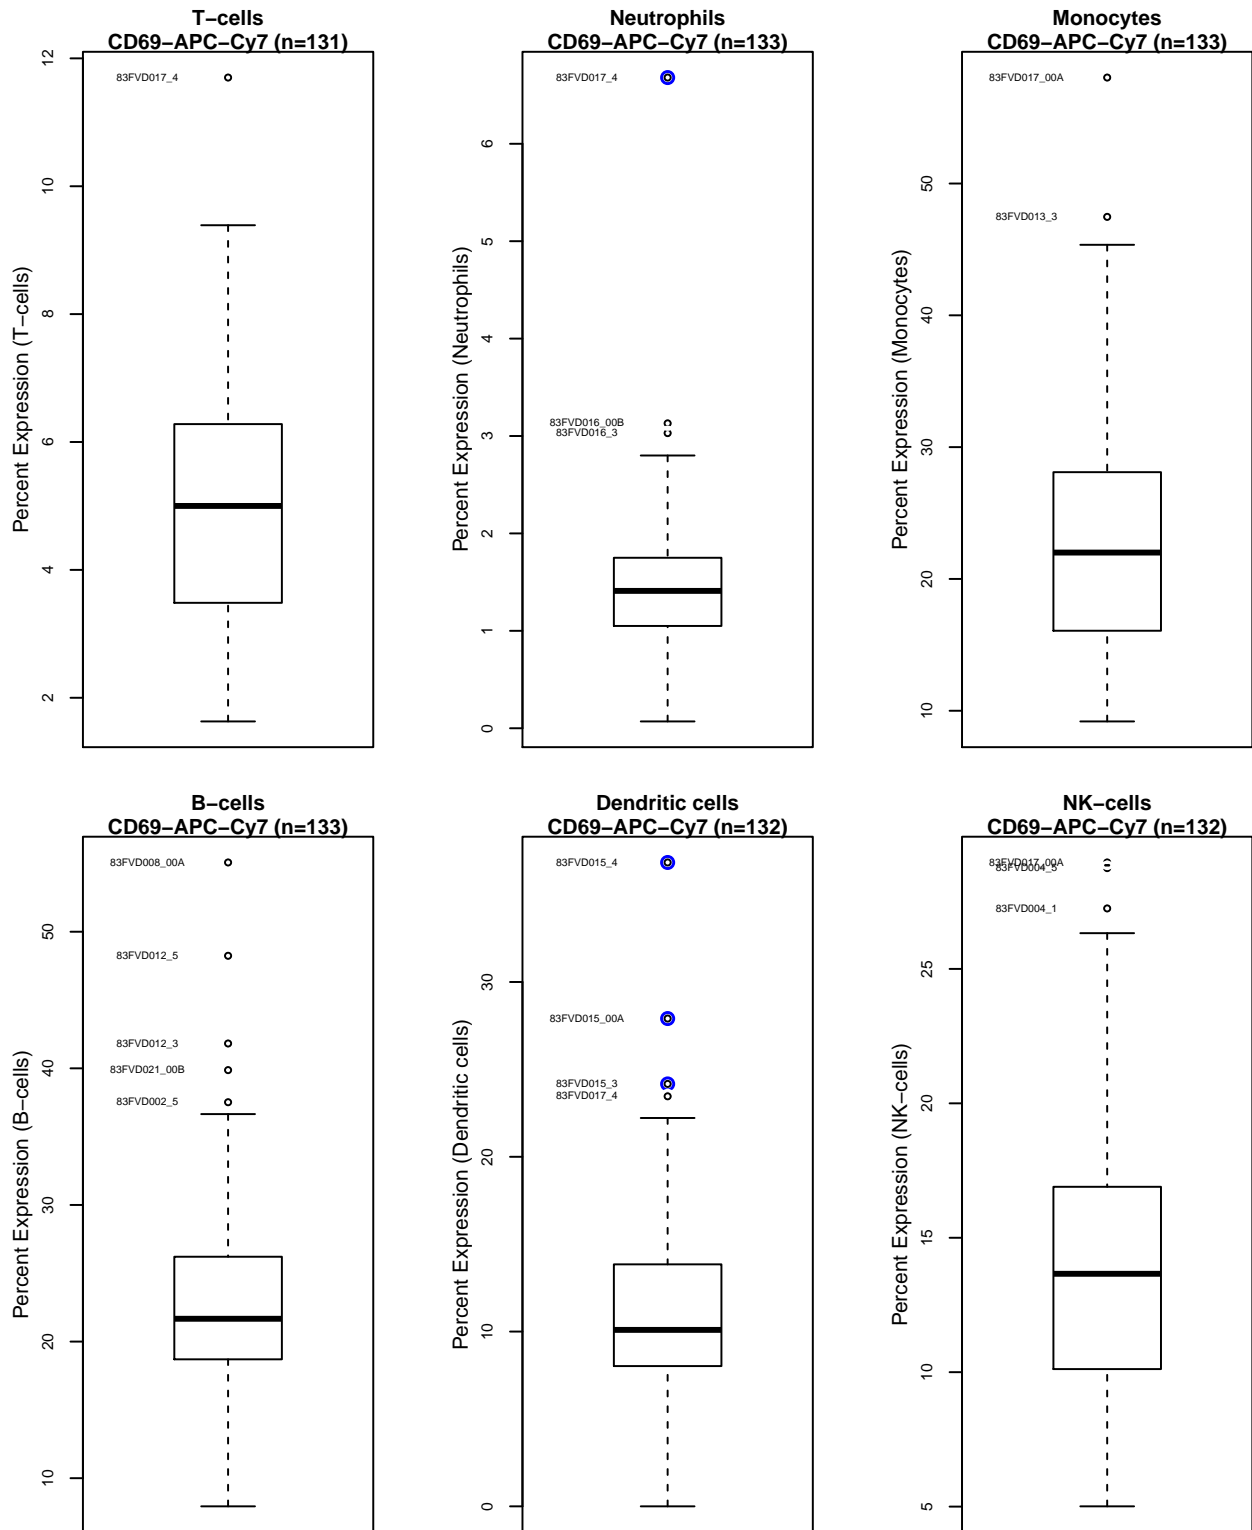

Figure A178: Boxplots of percent cell activation by cell type (FACS, CD69). Identified outliers are colored in blue.

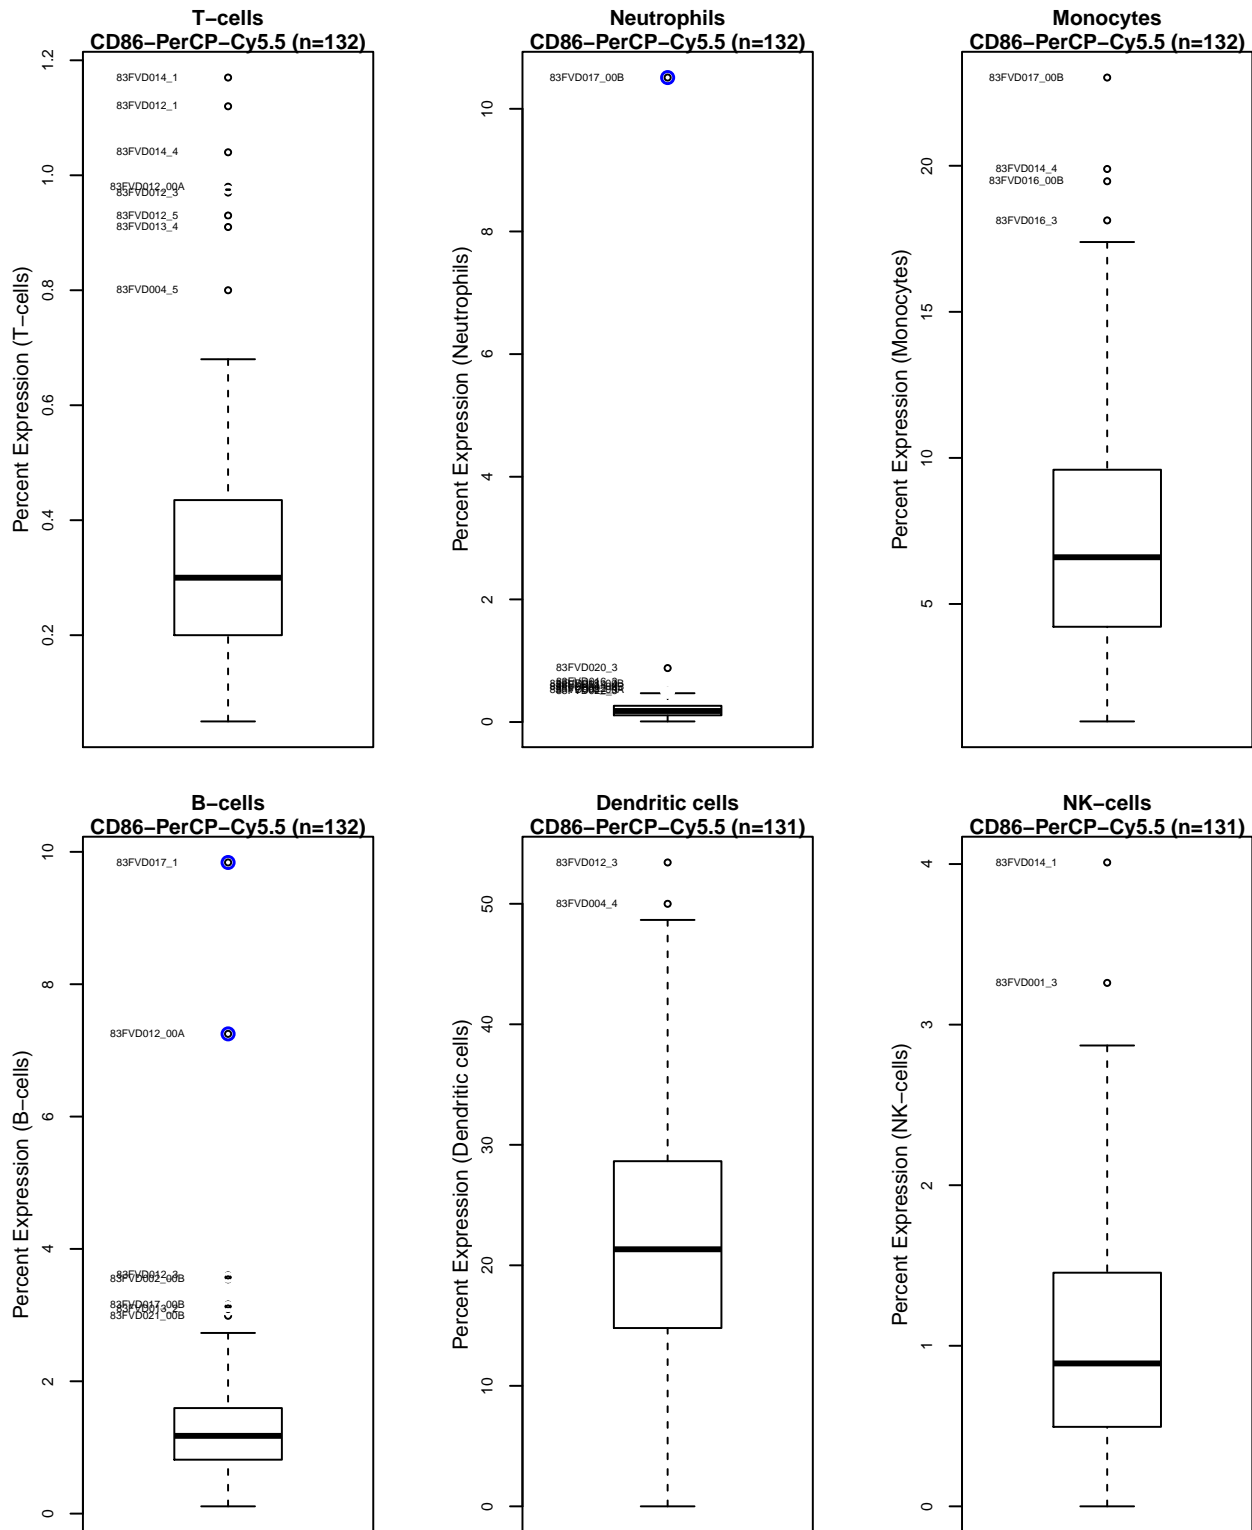

Figure A179: Boxplots of percent cell activation by cell type (FACS, CD86). Identified outliers are colored in blue.

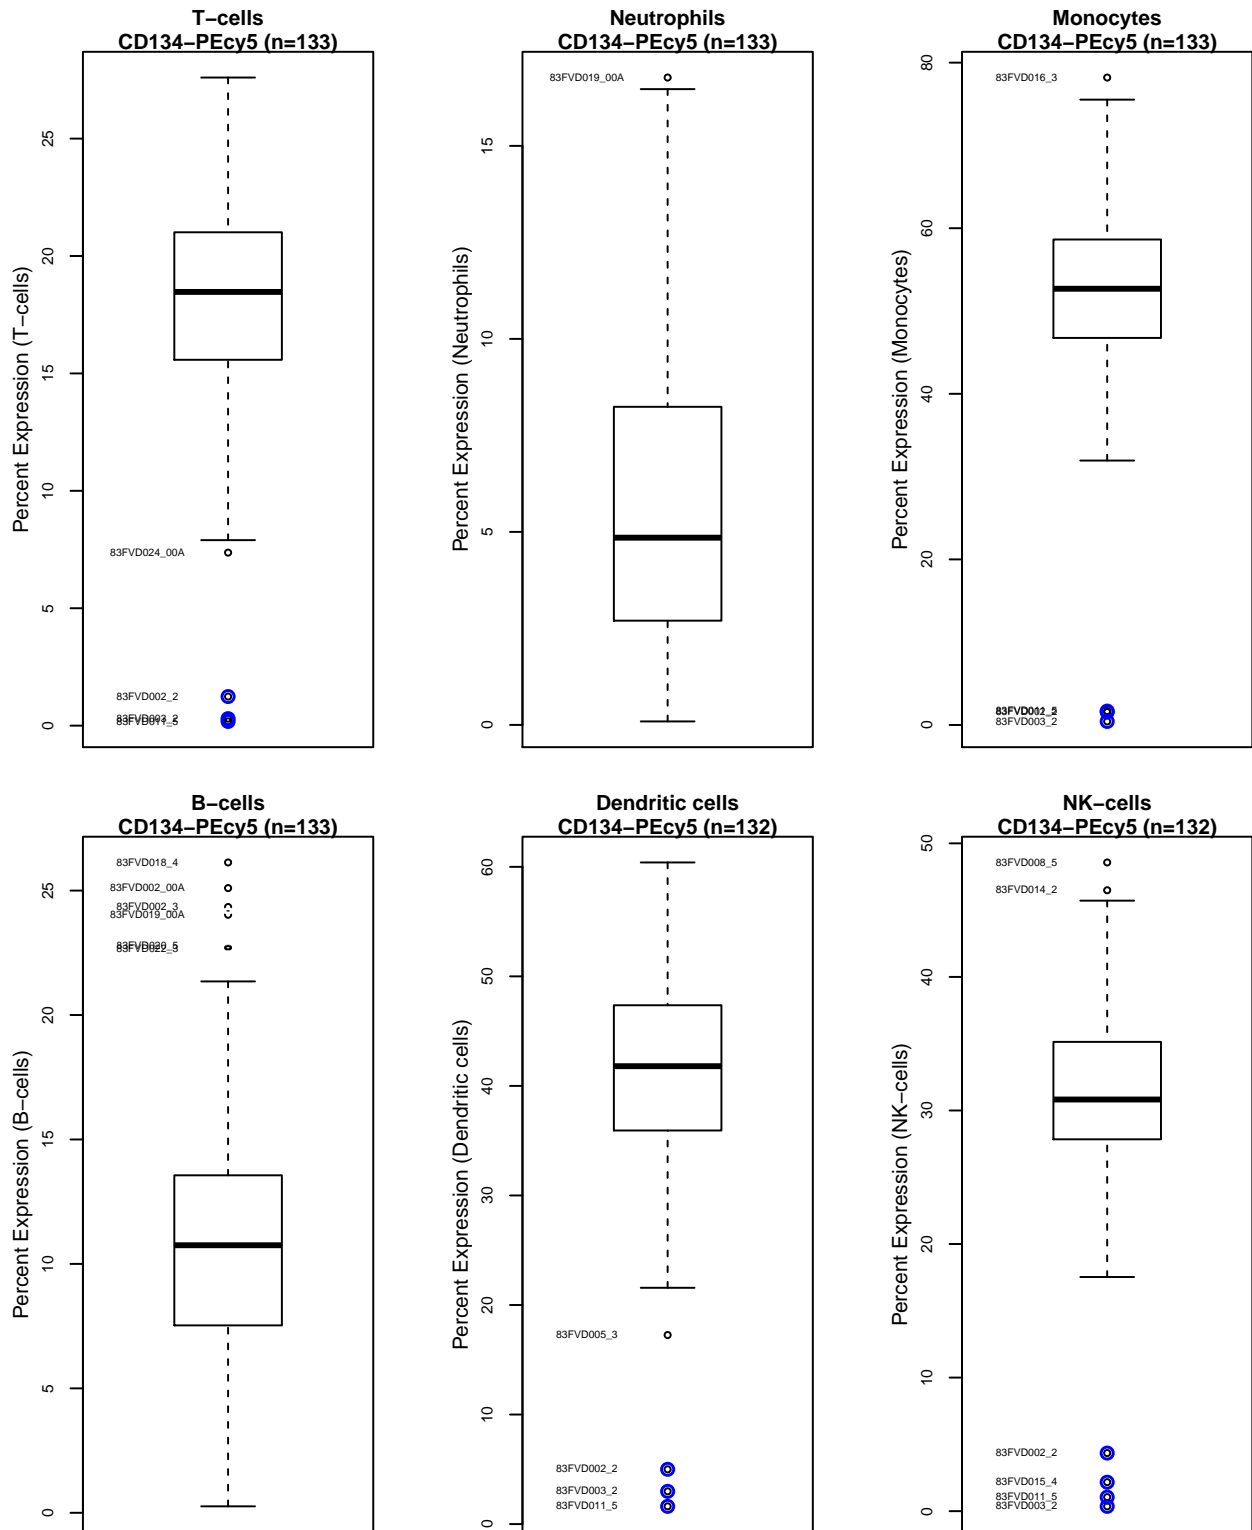

Figure A180: Boxplots of percent cell activation by cell type (FACS, CD134). Identified outliers are colored in blue.

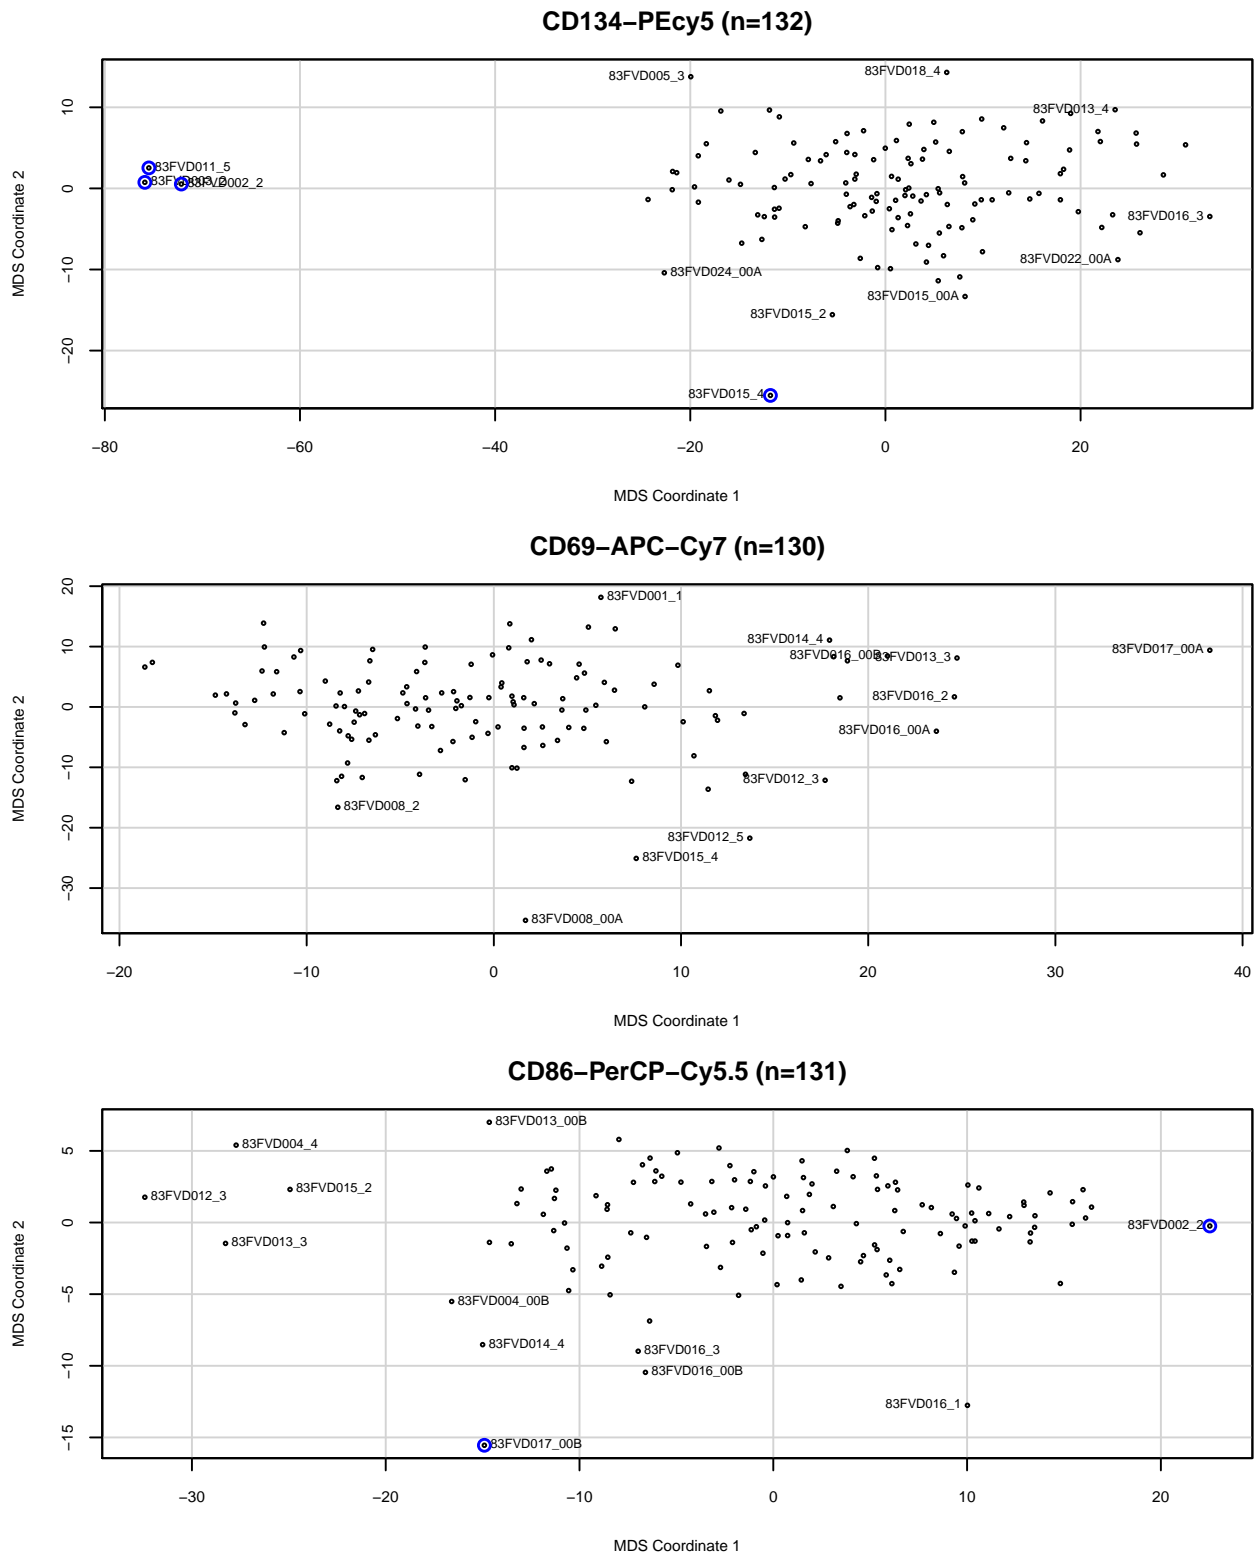

**Figure A181:** Non-metric multidimensional scaling biplots for each cell activation marker (FACS). For each marker, each subject and time point combination (sample) was represented by a multivariate vector that included all 6 celltype measurements. Pairwise distances between samples were calculated using the Euclidean distance. Identified outlying samples are highlighted in blue.



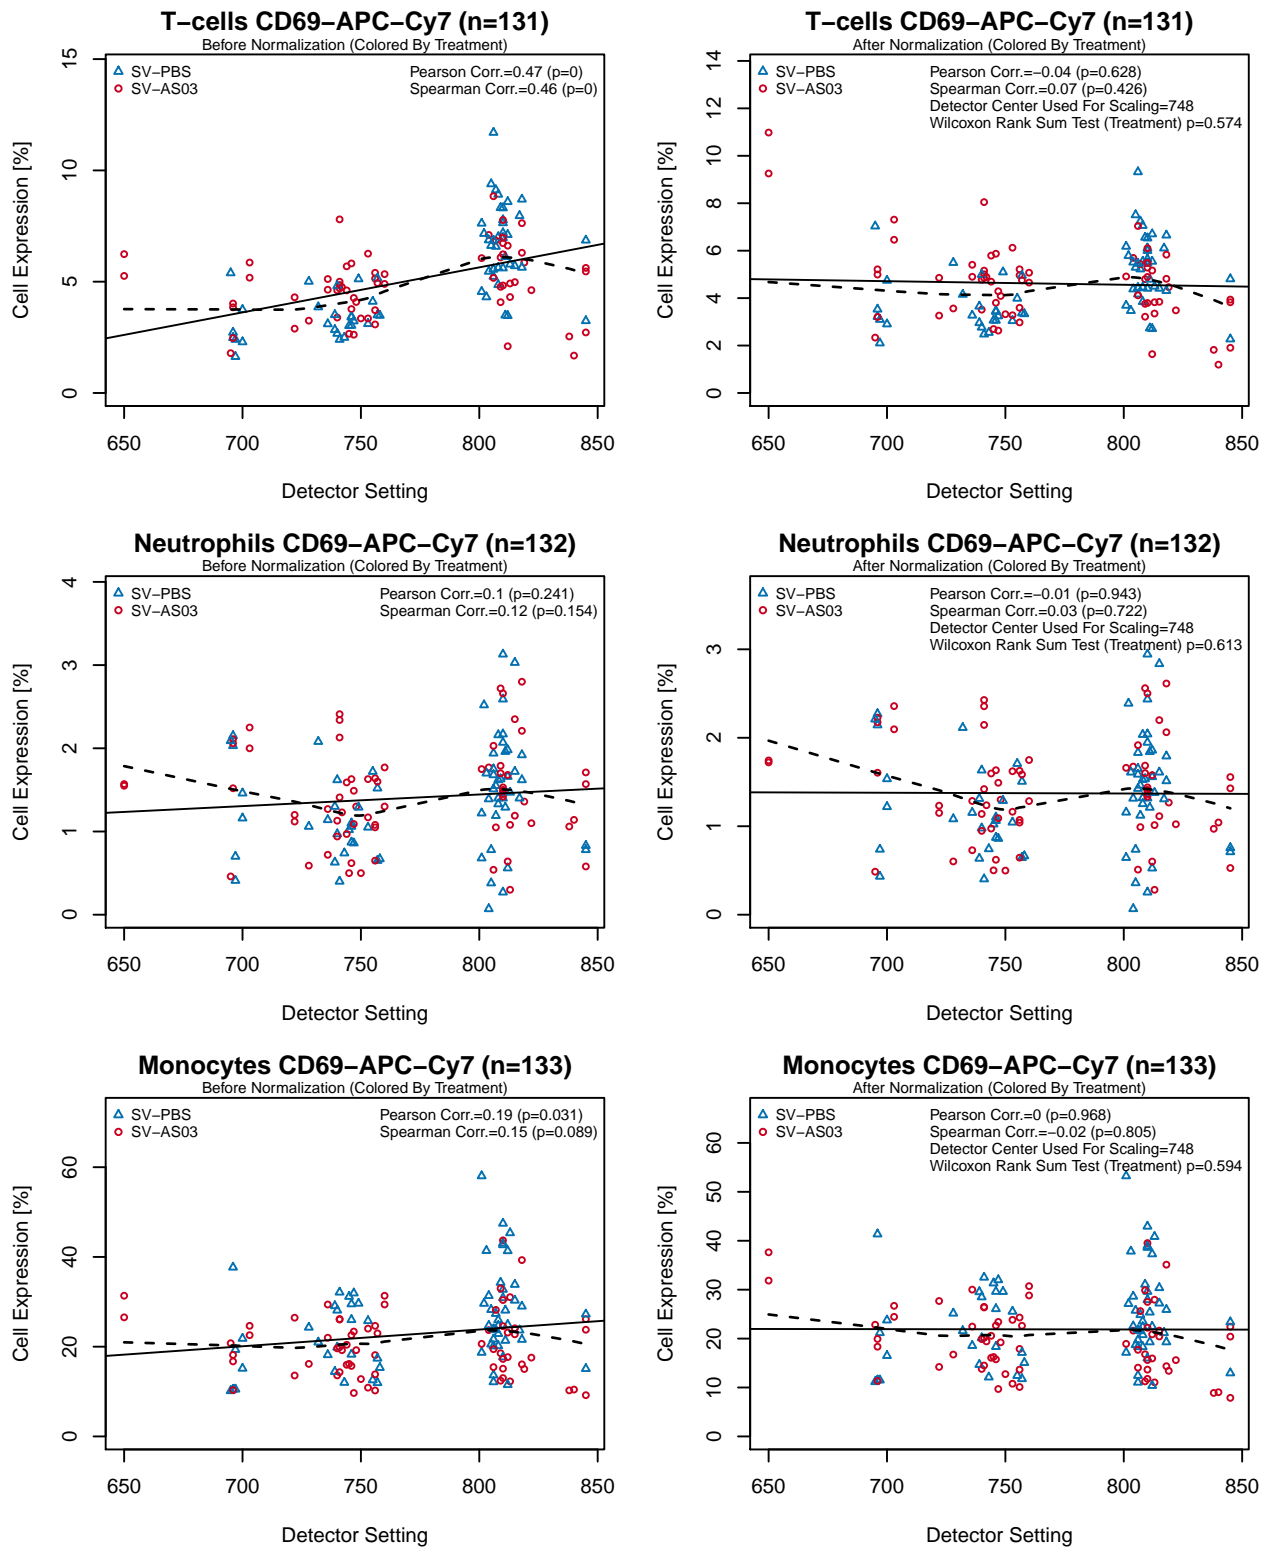

**Figure A182:** Scatterplots of percent cell activation by detector setting (FACS, CD69, T-cells, neutrophils, monocytes, colored by vaccine group). The left column shows scatter plots before normalization, the right column shows the data after normalization.

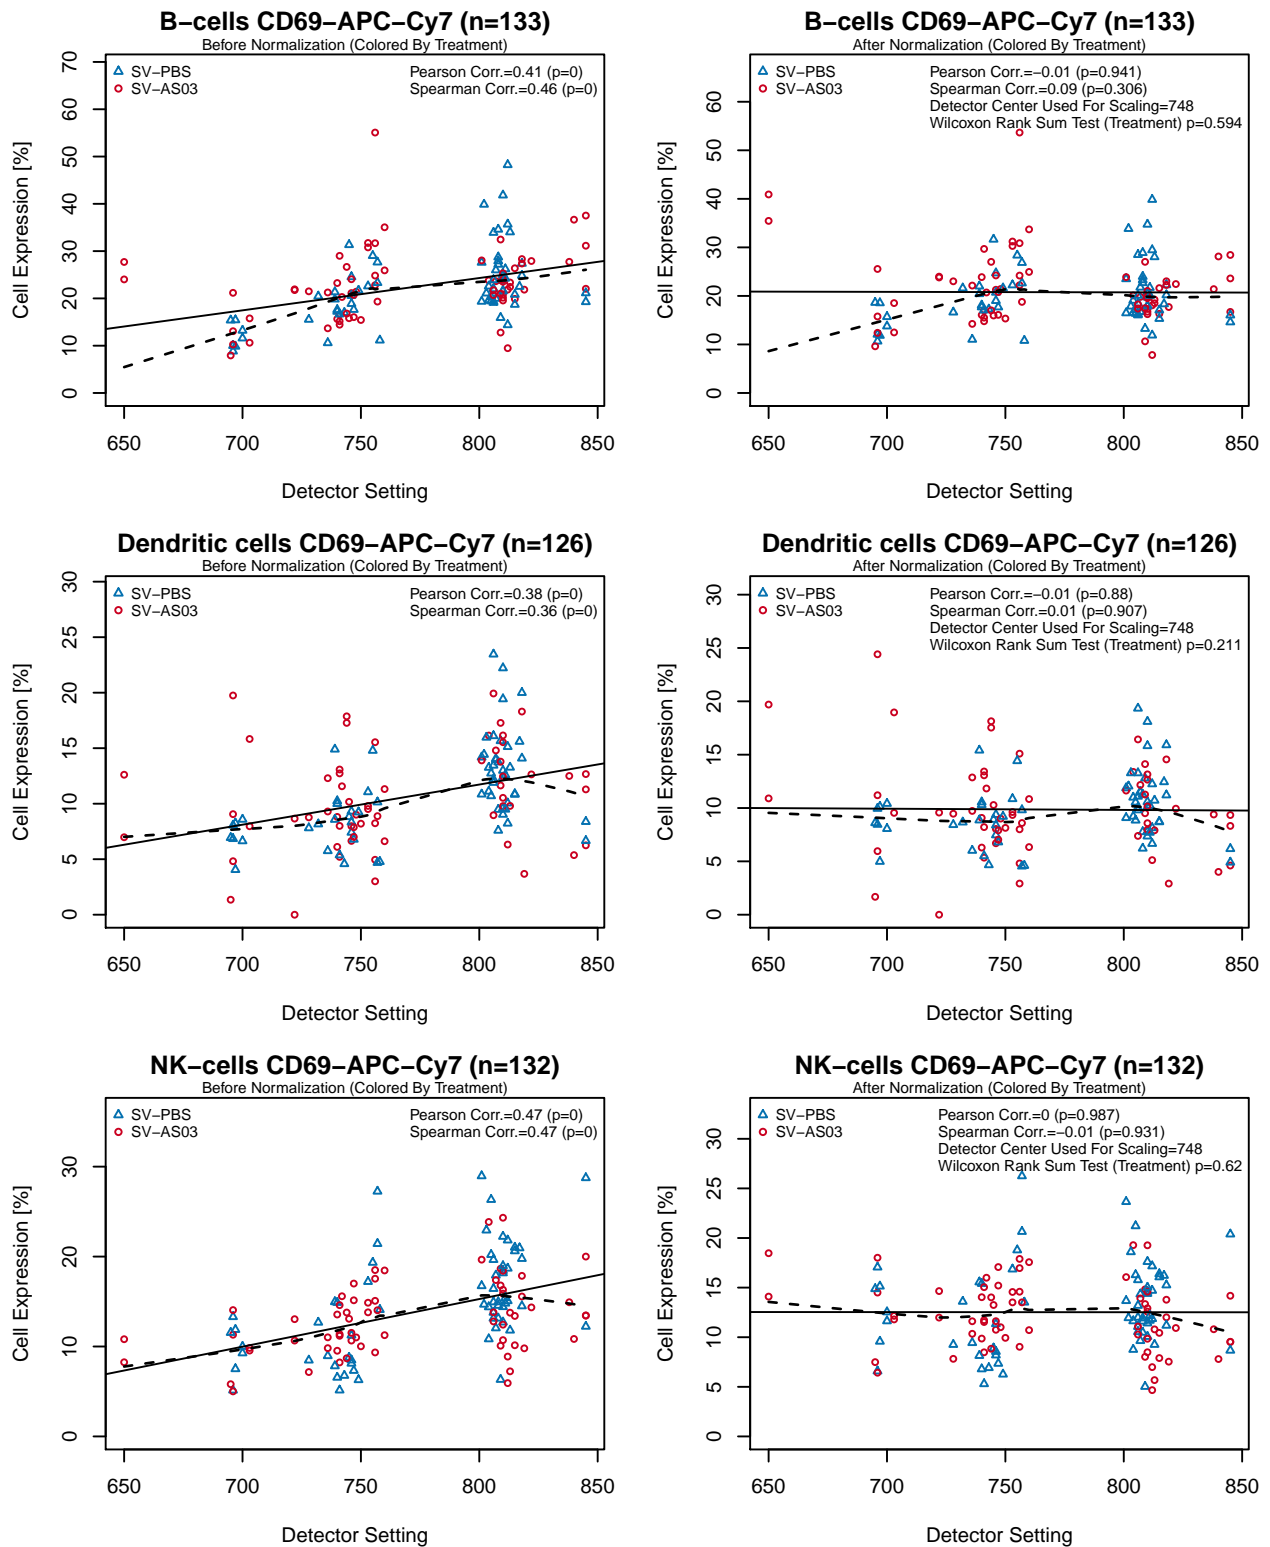

**Figure A183:** Scatterplots of percent cell activation by detector setting (FACS, CD69, B-cells, dendritic cells, NK-cells, colored by vaccine group). The left column shows scatter plots before normalization, the right column shows the data after normalization.

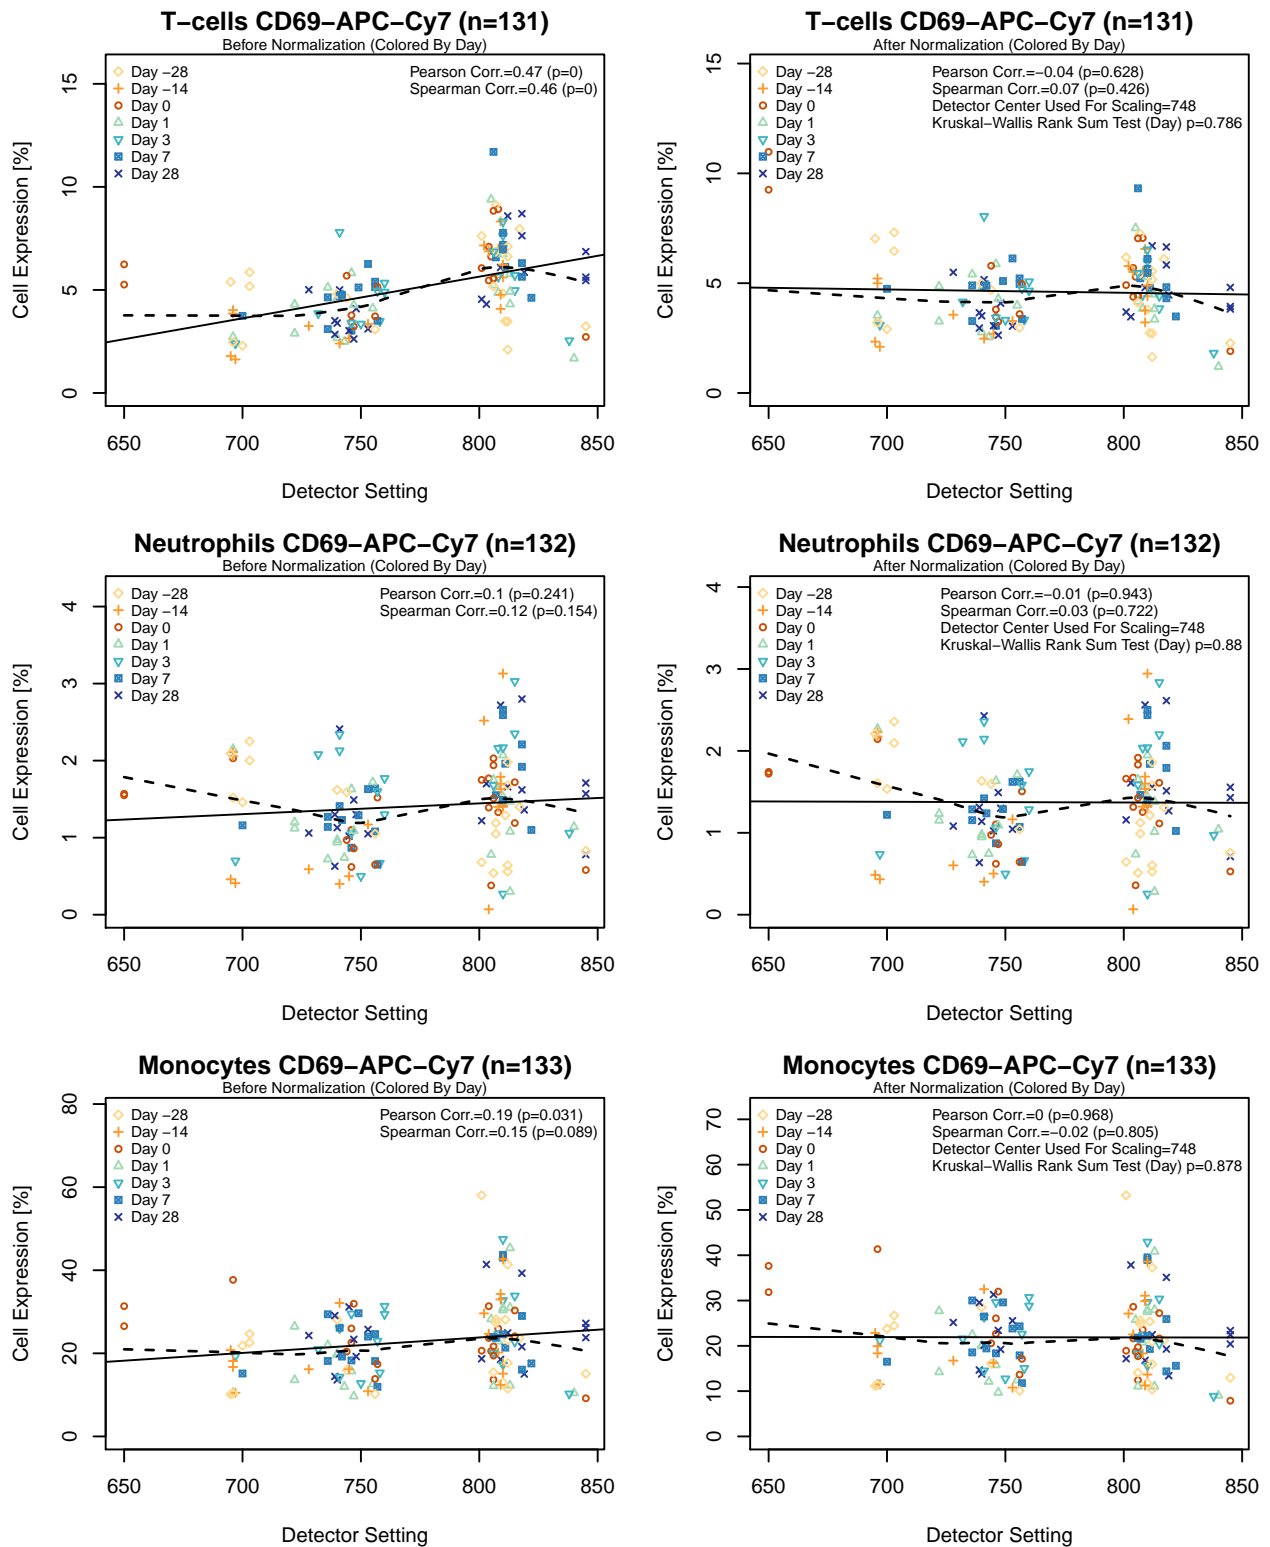

**Figure A184:** Scatterplots of percent cell activation by detector setting (FACS, CD69, T-cells, neutrophils, monocytes, colored by study visit day). The left column shows scatter plots before normalization, the right column shows the data after normalization.



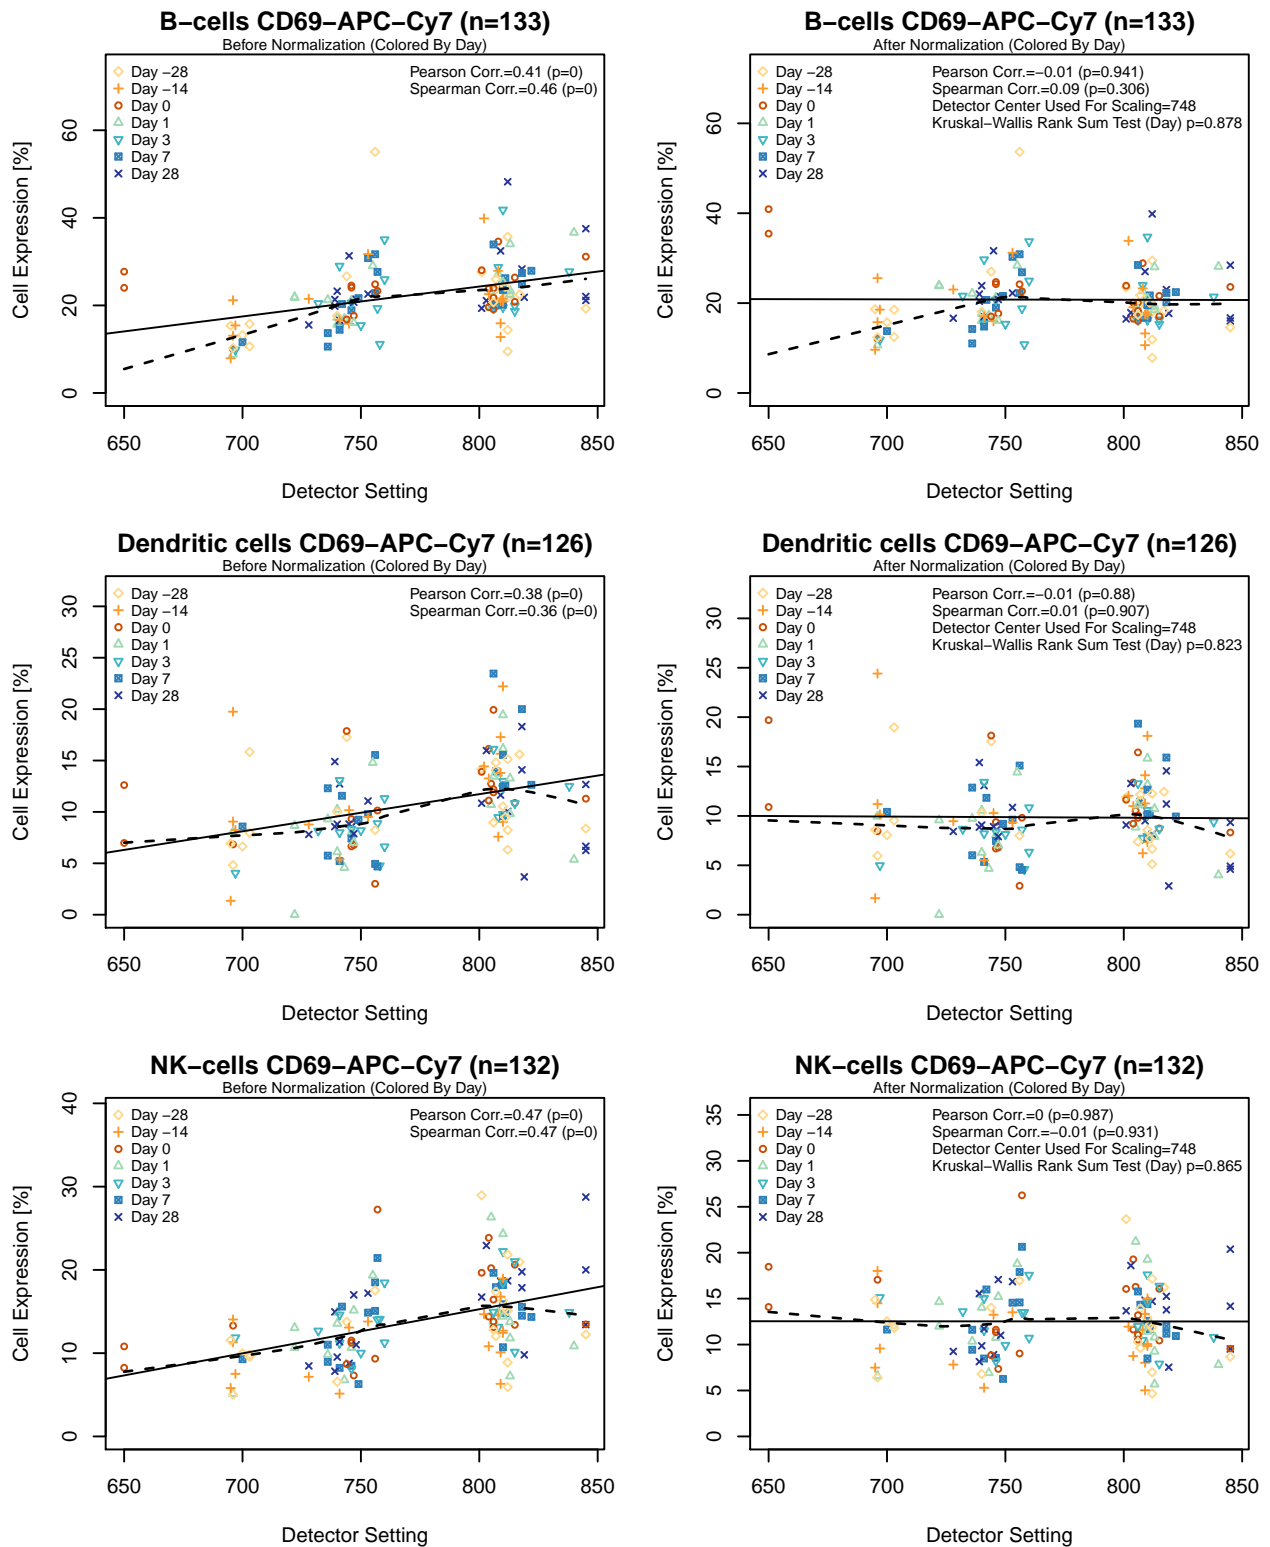

**Figure A185:** Scatterplots of percent cell activation by detector setting (FACS, CD69, B-cells, dendritic cells, NK-cells, colored by study visit day). The left column shows scatter plots before normalization, the right column shows the data after normalization.

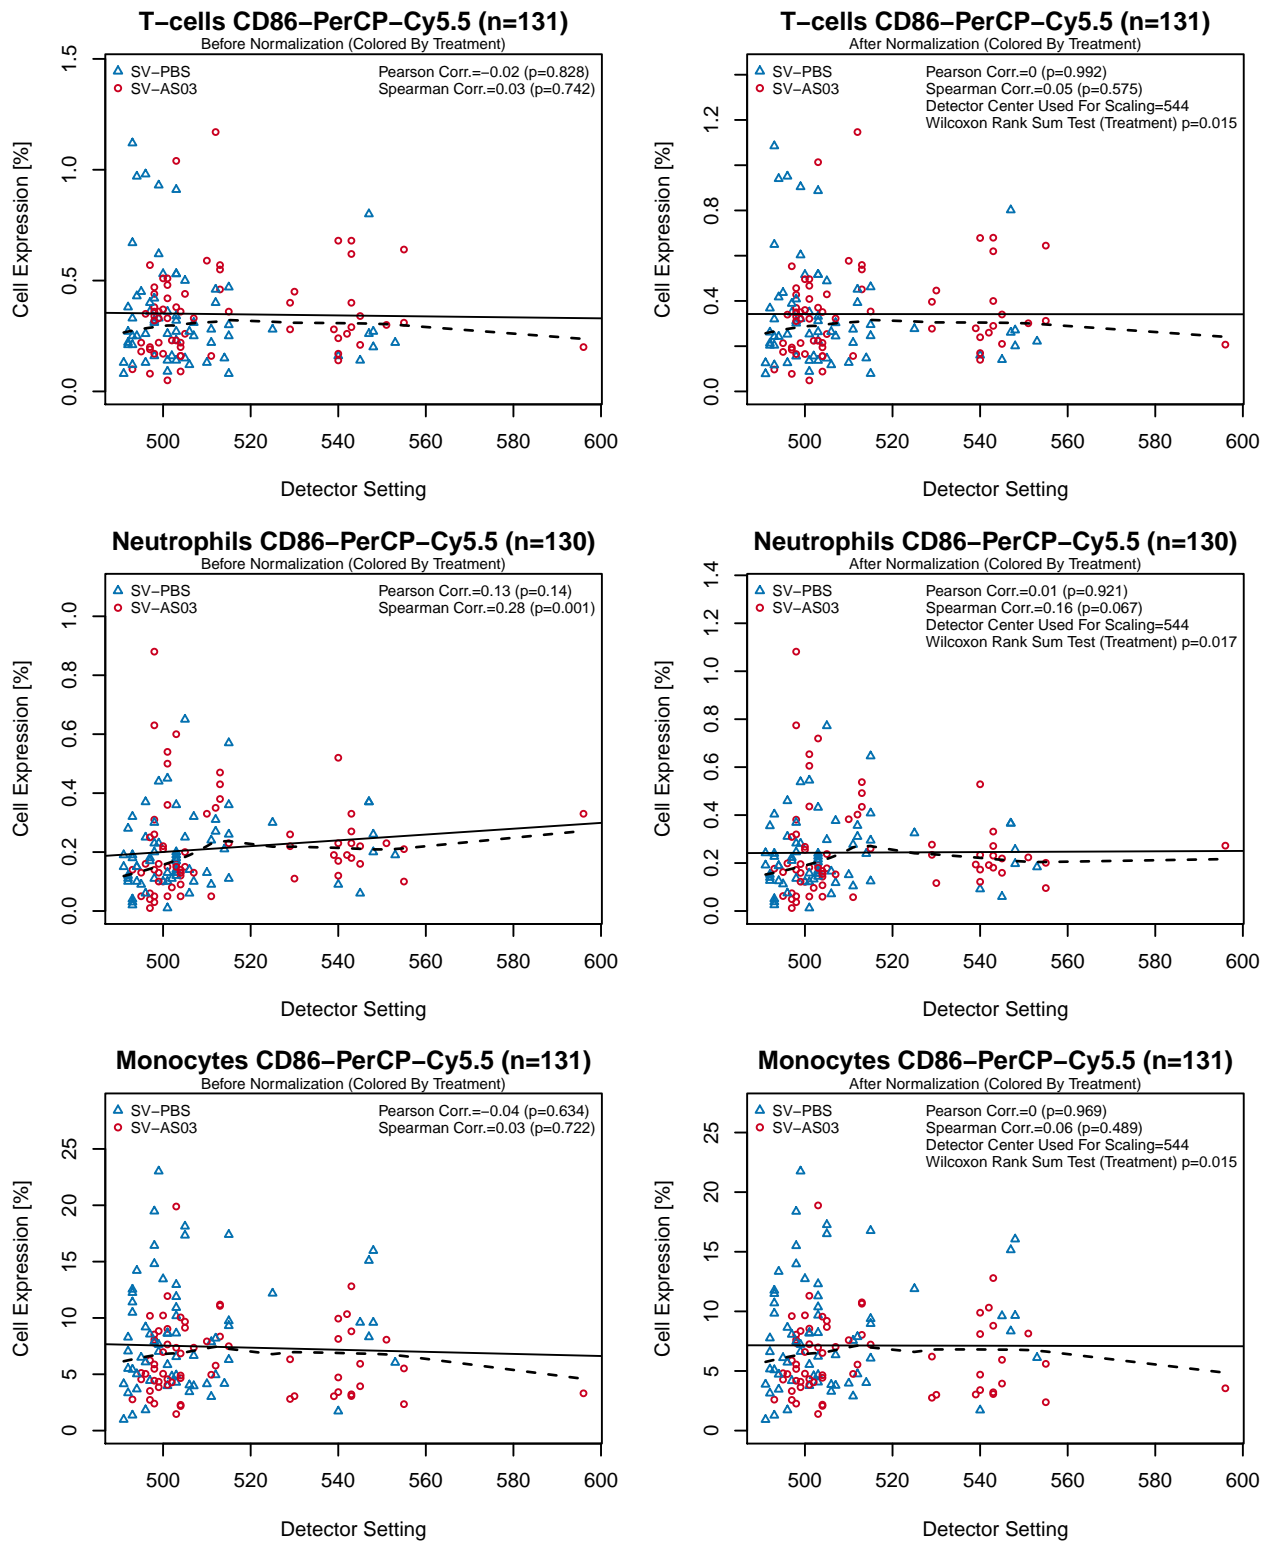

**Figure A186:** Scatterplots of percent cell activation by detector setting (FACS, CD86, T-cells, neutrophils, monocytes, colored by vaccine group). The left column shows scatter plots before normalization, the right column shows the data after normalization.

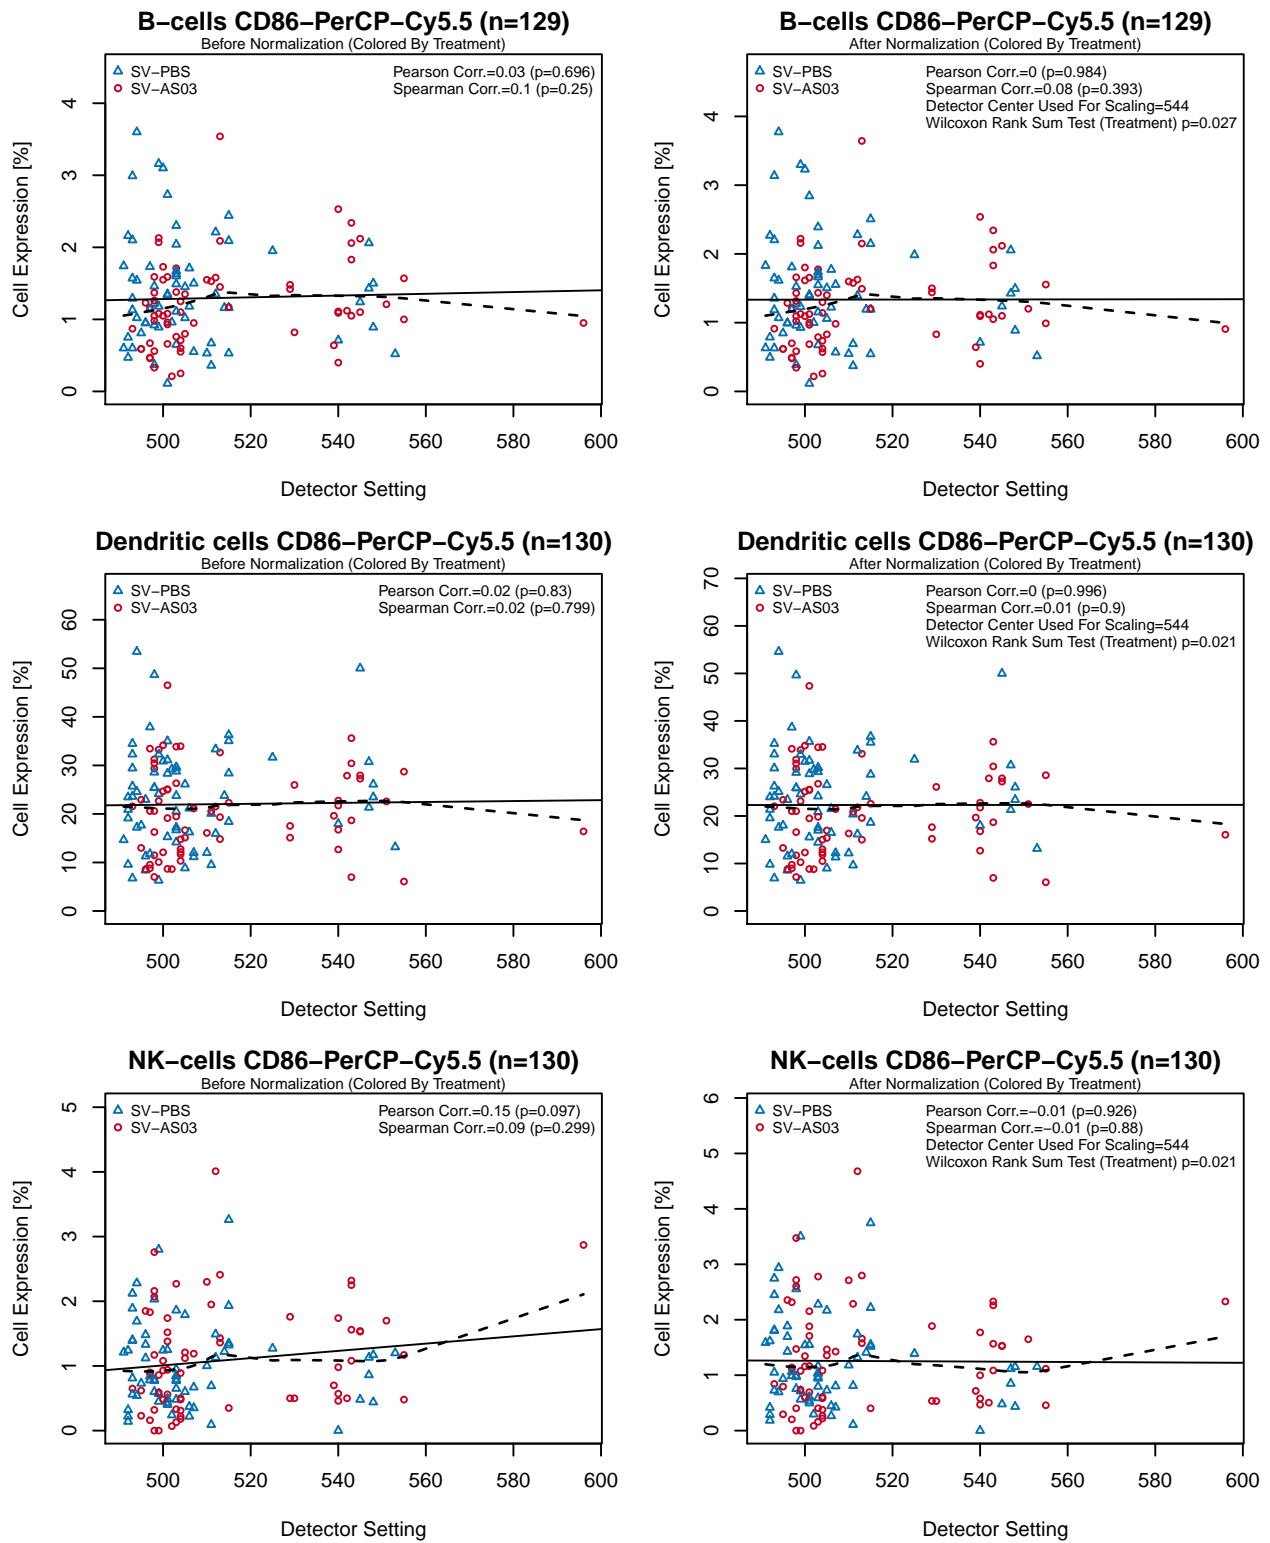

**Figure A187:** Scatterplots of percent cell activation by detector setting (FACS, CD86, B-cells, dendritic cells, NK-cells, colored by vaccine group). The left column shows scatter plots before normalization, the right column shows the data after normalization.

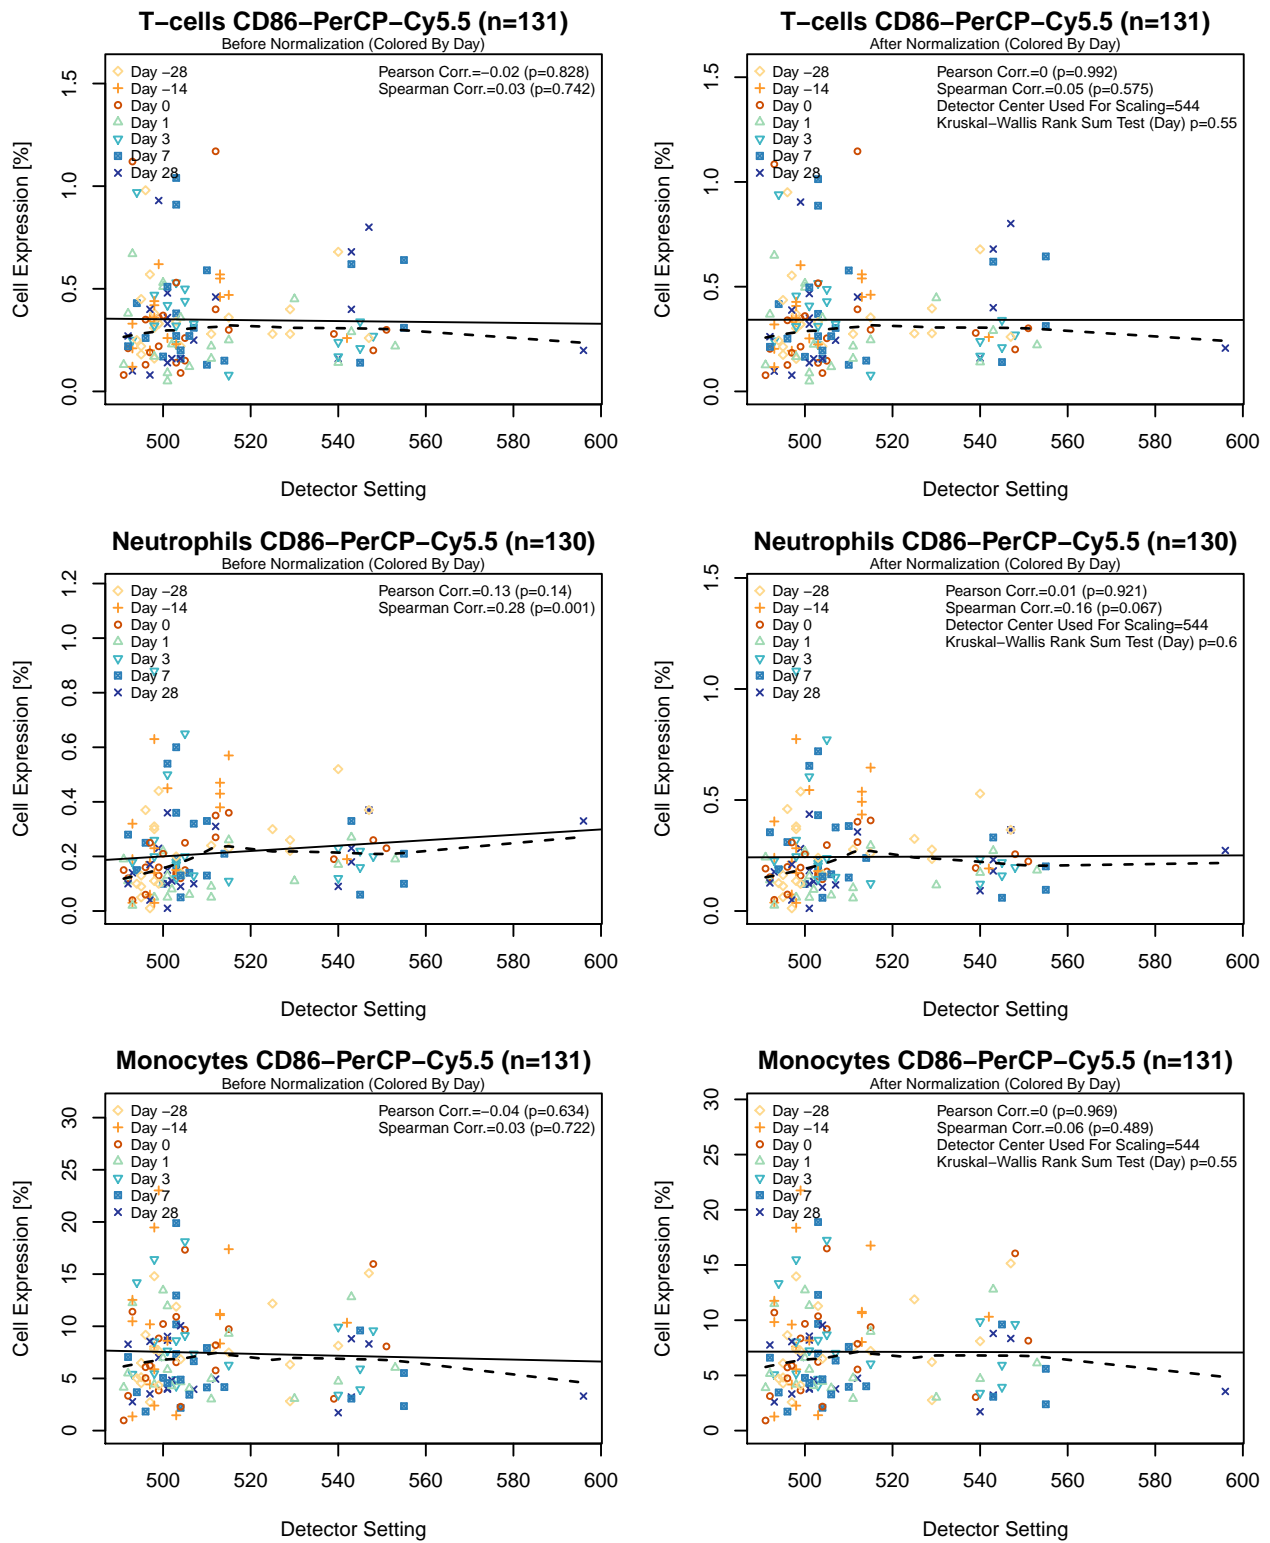

**Figure A188:** Scatterplots of percent cell activation by detector setting (FACS, CD86, T-cells, neutrophils, monocytes, colored by study visit day). The left column shows scatter plots before normalization, the right column shows the data after normalization.

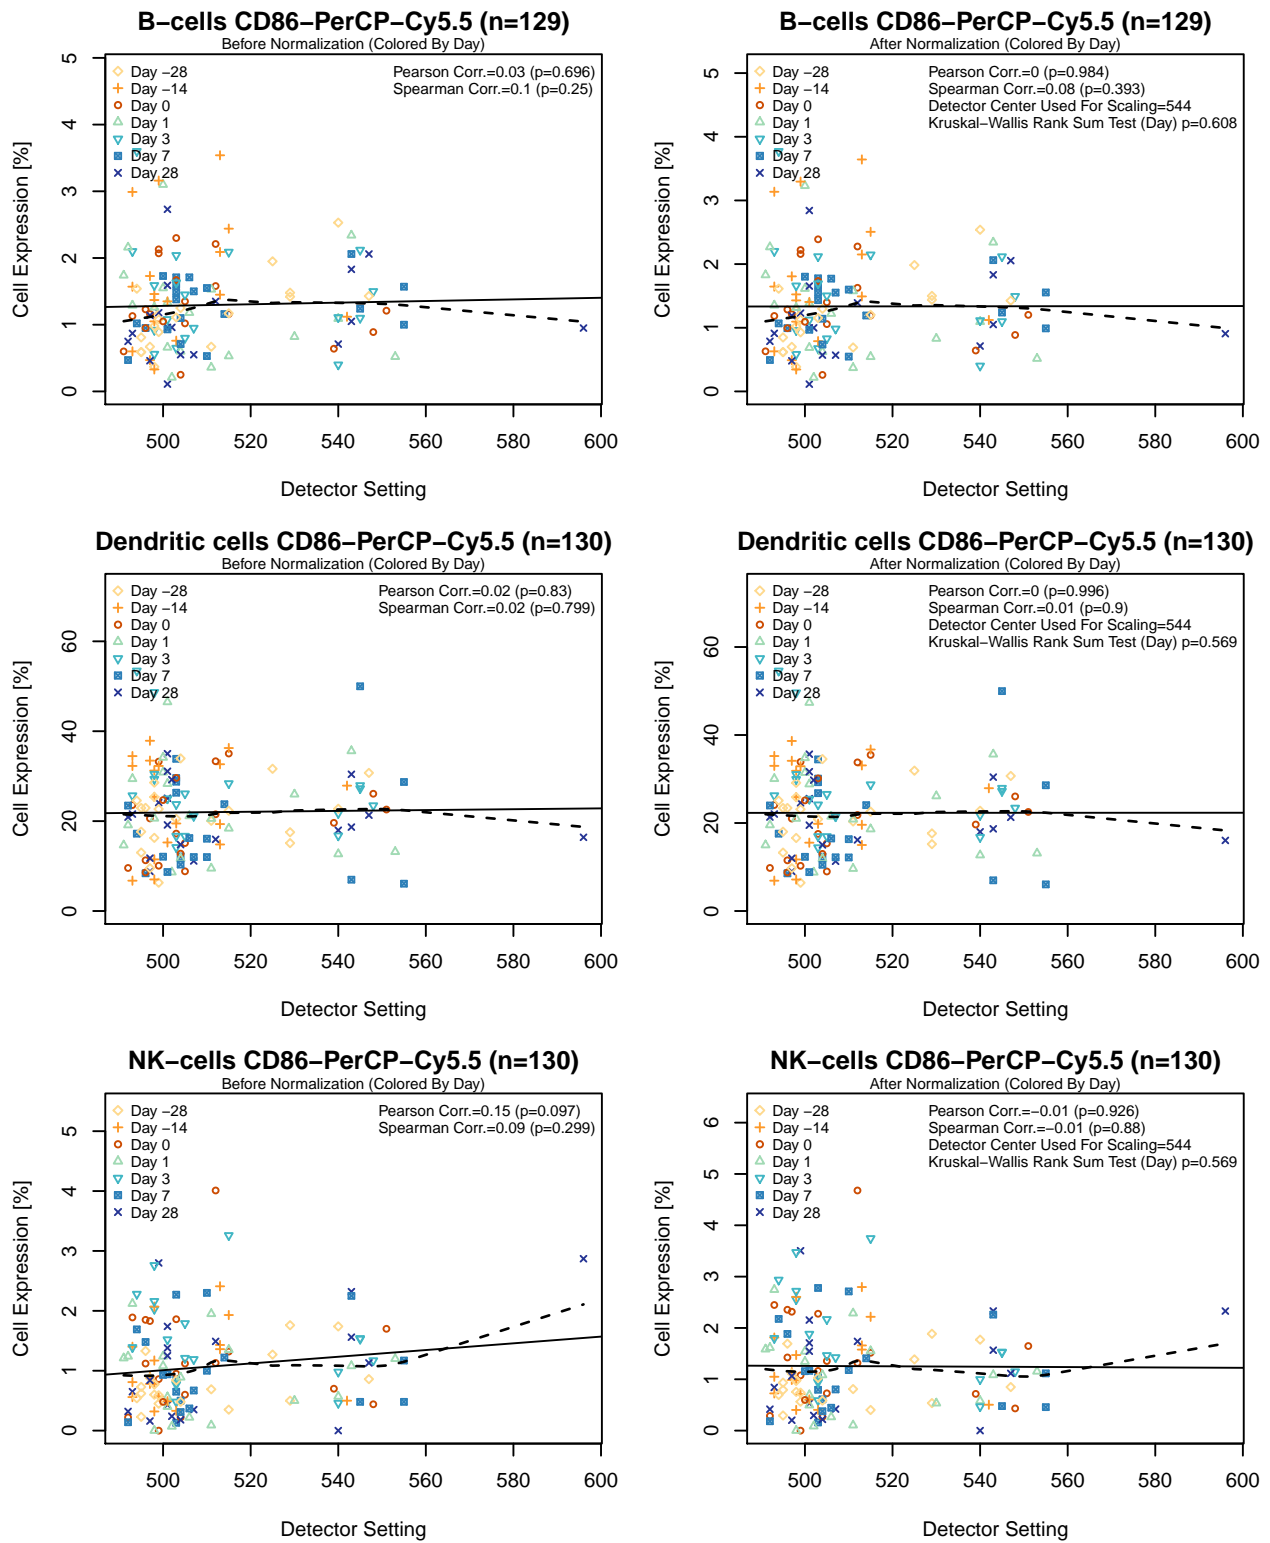

**Figure A189:** Scatterplots of percent cell activation by detector setting (FACS, CD86, B-cells, dendritic cells, NK-cells, colored by study visit day). The left column shows scatter plots before normalization, the right column shows the data after normalization.

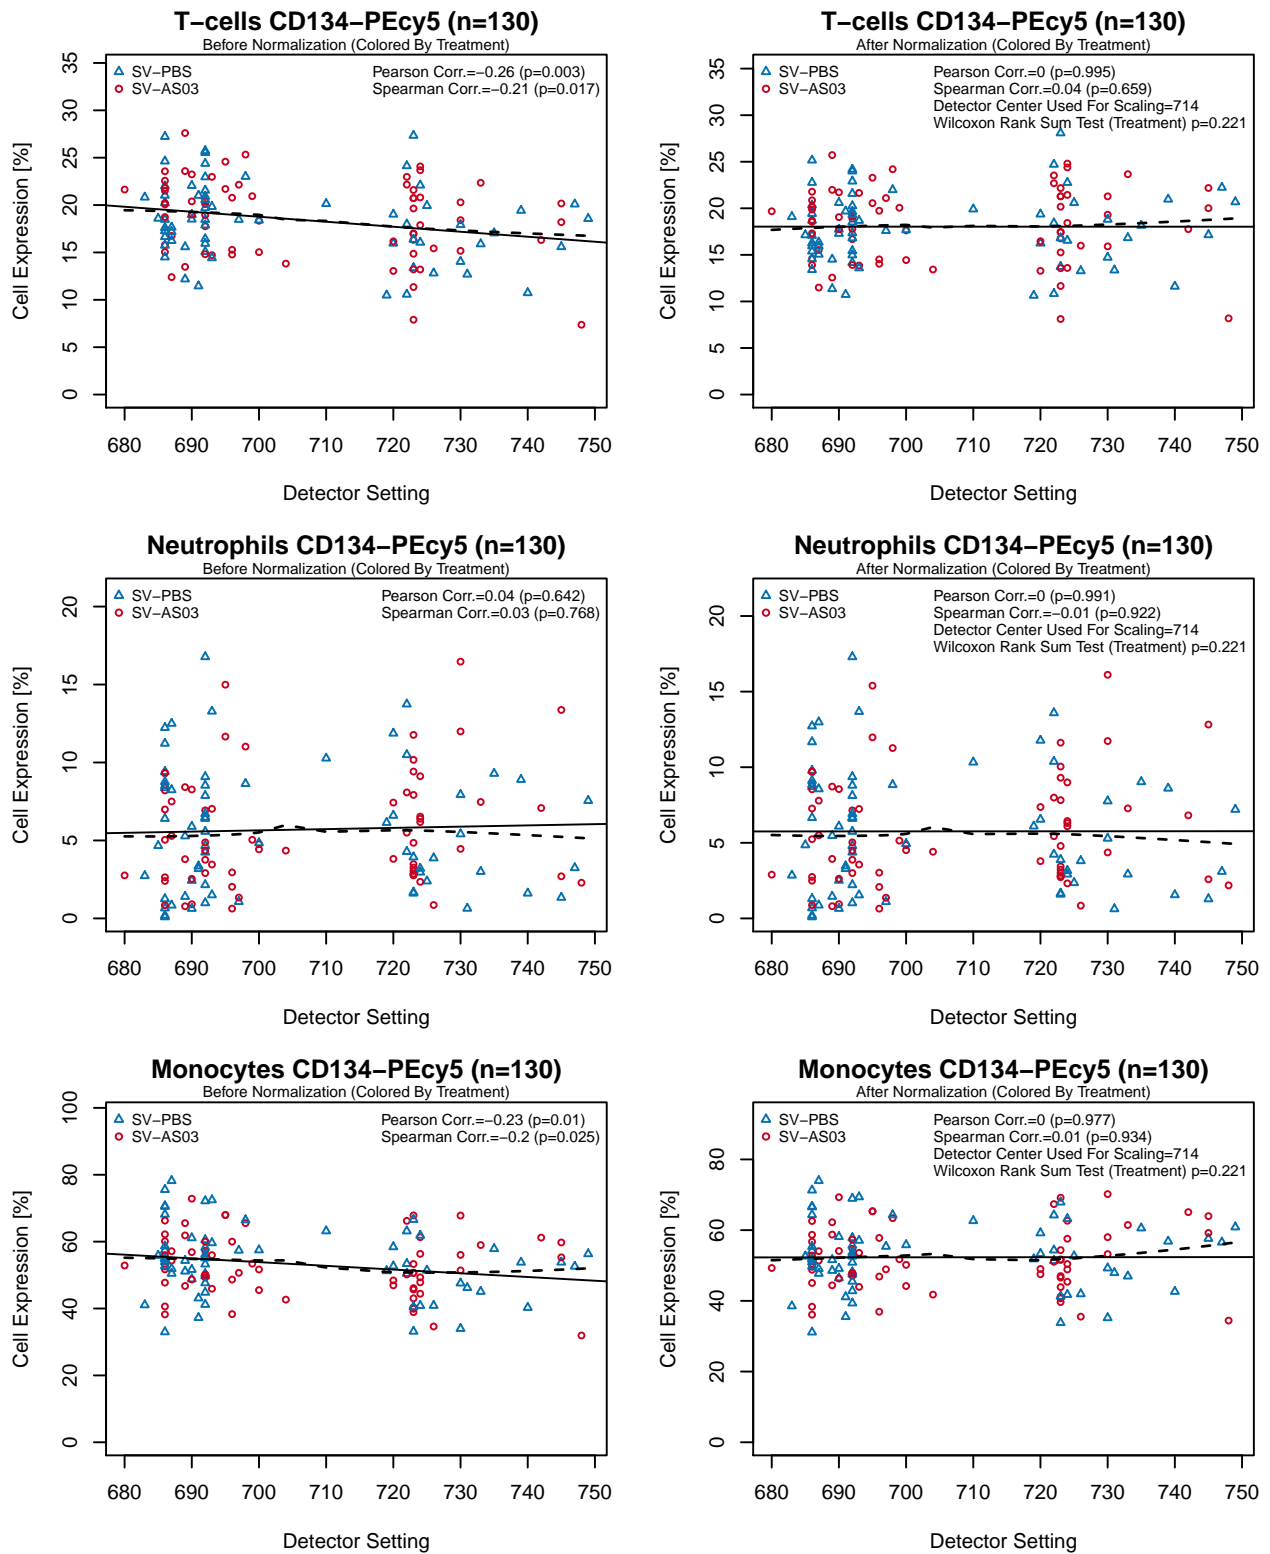

**Figure A190:** Scatterplots of percent cell activation by detector setting (FACS, CD134, T-cells, neutrophils, monocytes, colored by vaccine group). The left column shows scatter plots before normalization, the right column shows the data after normalization.

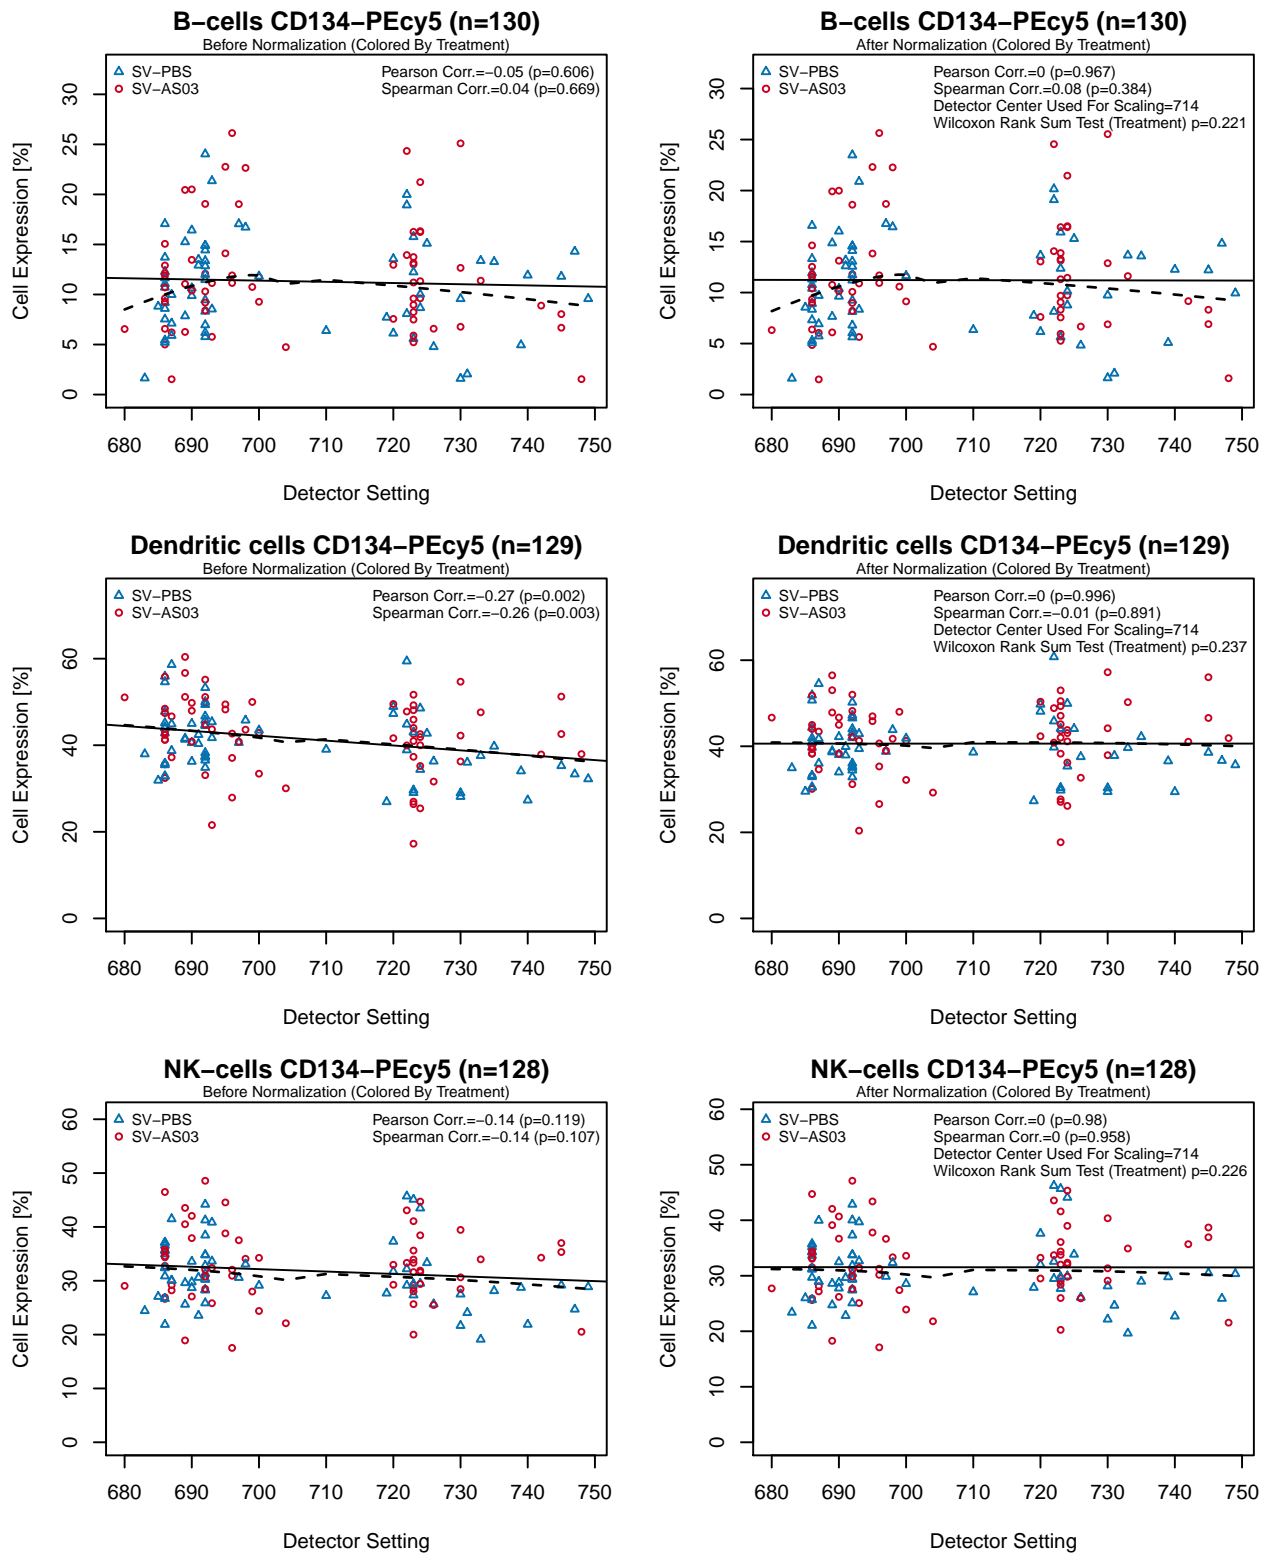

**Figure A191:** Scatterplots of percent cell activation by detector setting (FACS, CD134, B-cells, dendritic cells, NK-cells, colored by vaccine group). The left column shows scatter plots before normalization, the right column shows the data after normalization.

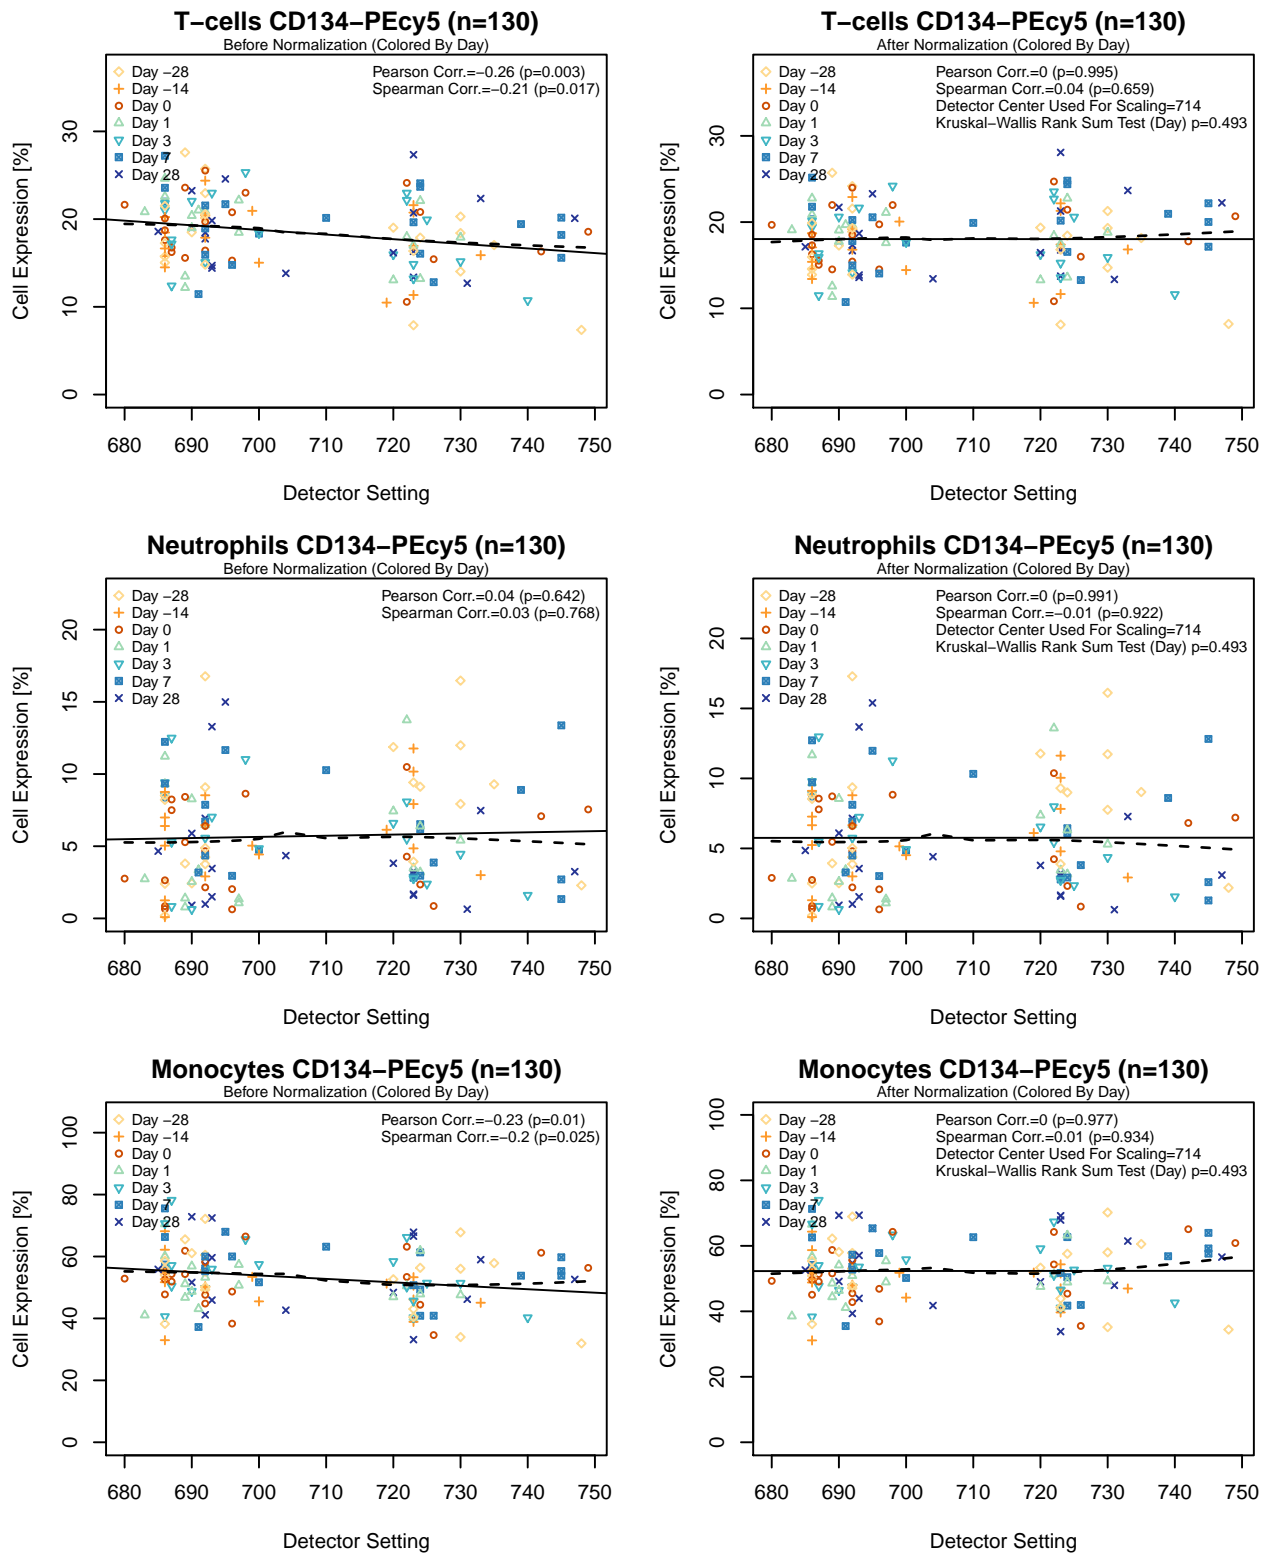

**Figure A192:** Scatterplots of percent cell activation by detector setting (FACS, CD134, T-cells, neutrophils, monocytes, colored by study visit day). The left column shows scatter plots before normalization, the right column shows the data after normalization.



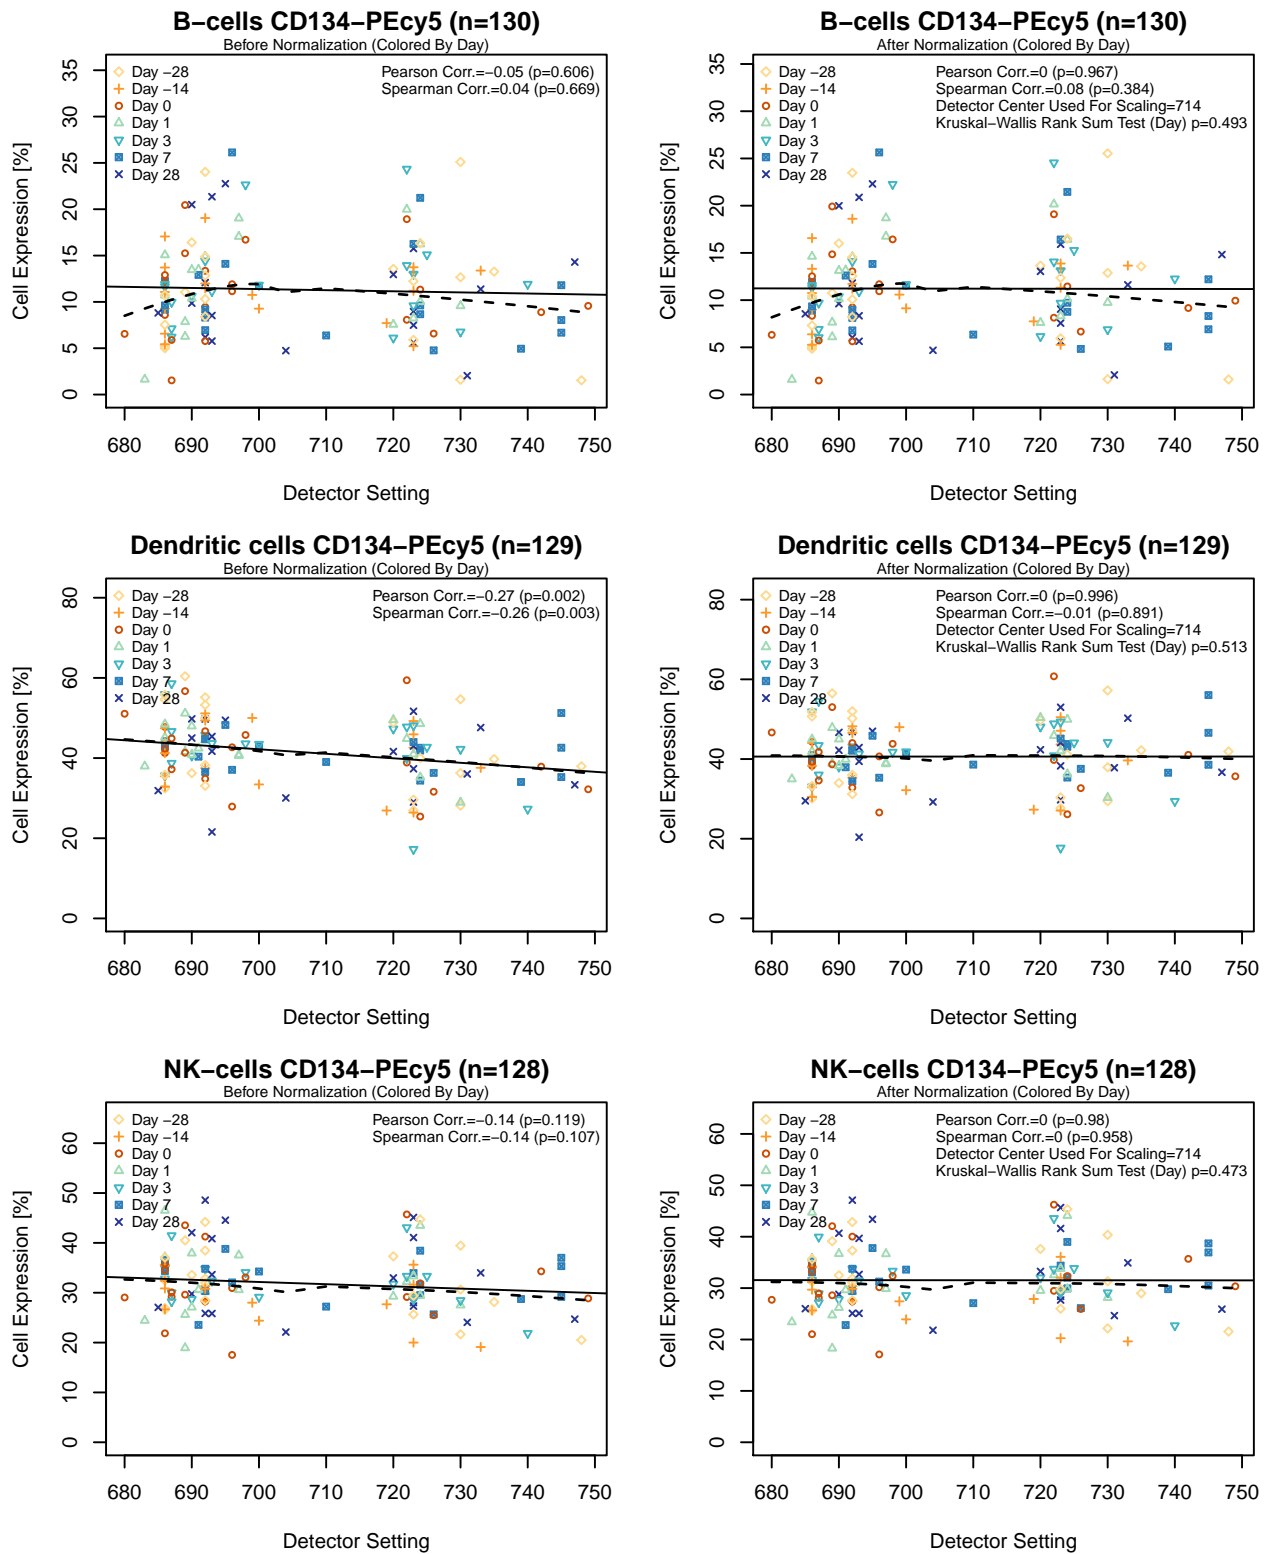

**Figure A193:** Scatterplots of percent cell activation by detector setting (FACS, CD134, B-cells, dendritic cells, NK-cells, colored by study visit day). The left column shows scatter plots before normalization, the right column shows the data after normalization.

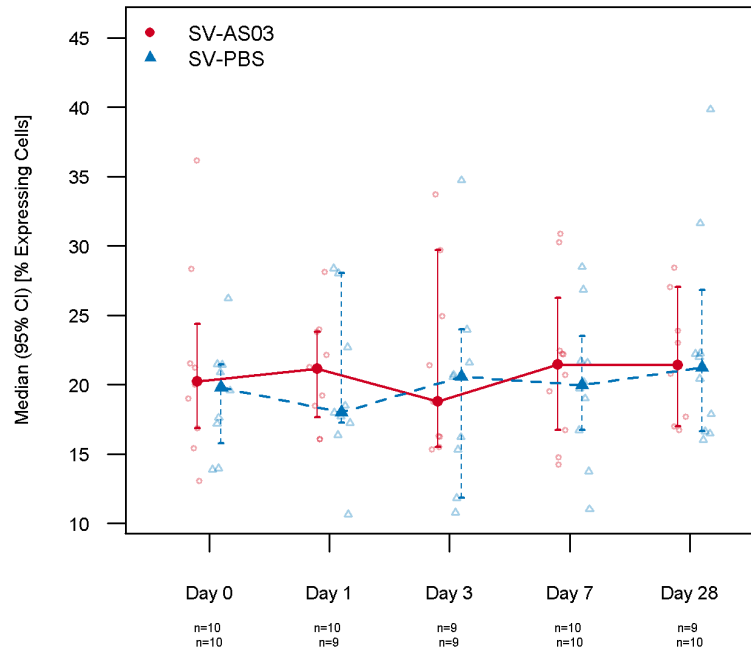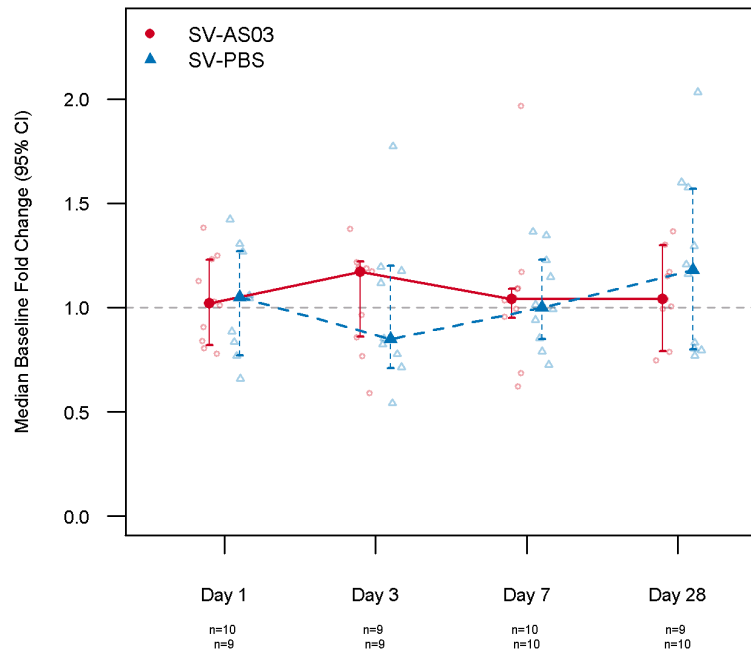

**Figure A194:** Median normalized cell activation plots for CD69 (FACS, B-cells)

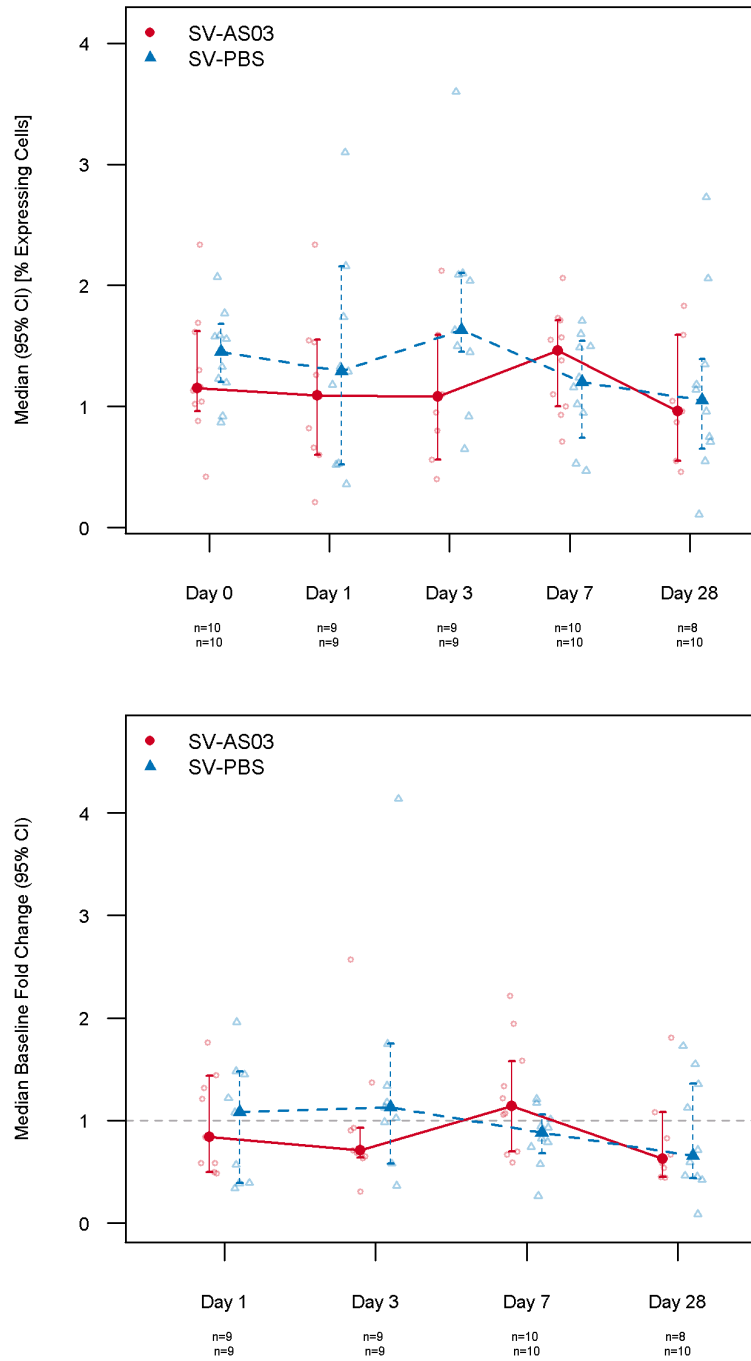

**Figure A195:** Median normalized cell activation plots for CD86 (FACS, B-cells)

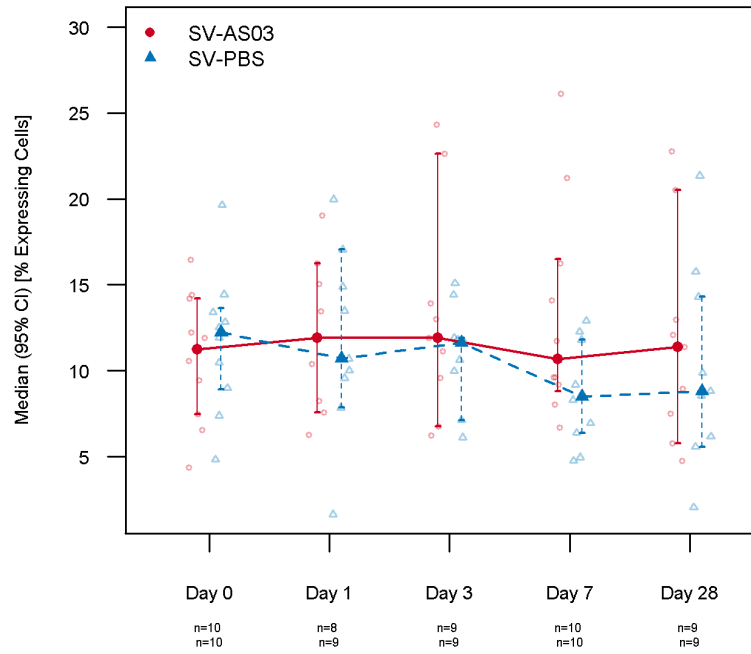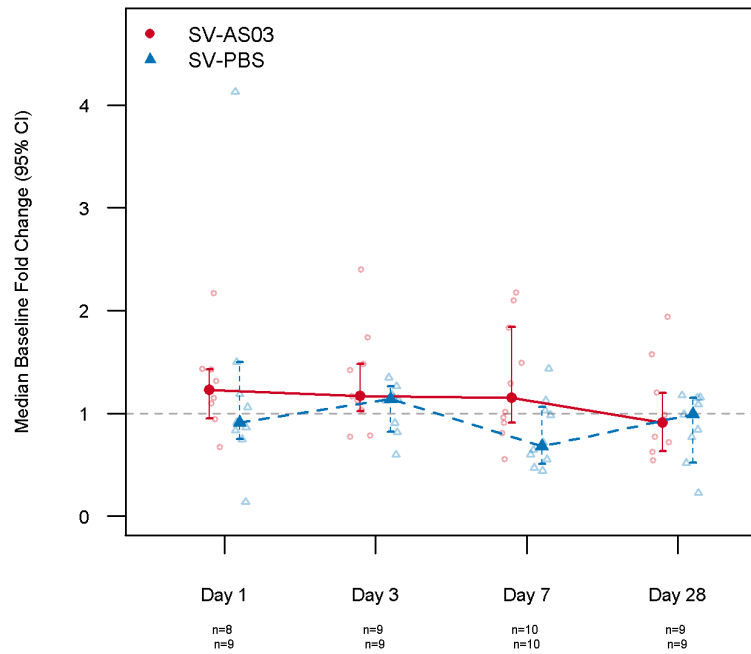

**Figure A196:** Median normalized cell activation plots for CD134 (FACS, B-cells)

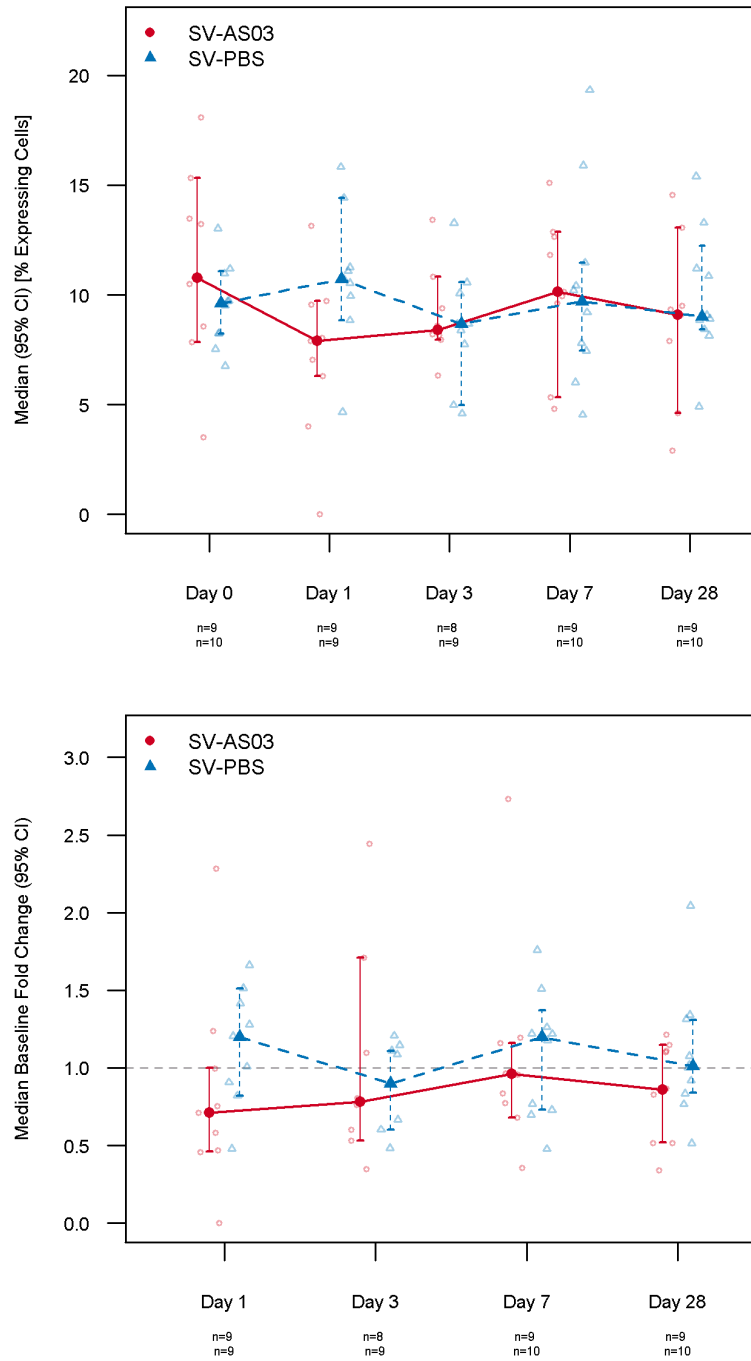

**Figure A197:** Median normalized cell activation plots for CD69 (FACS, Dendritic Cells)

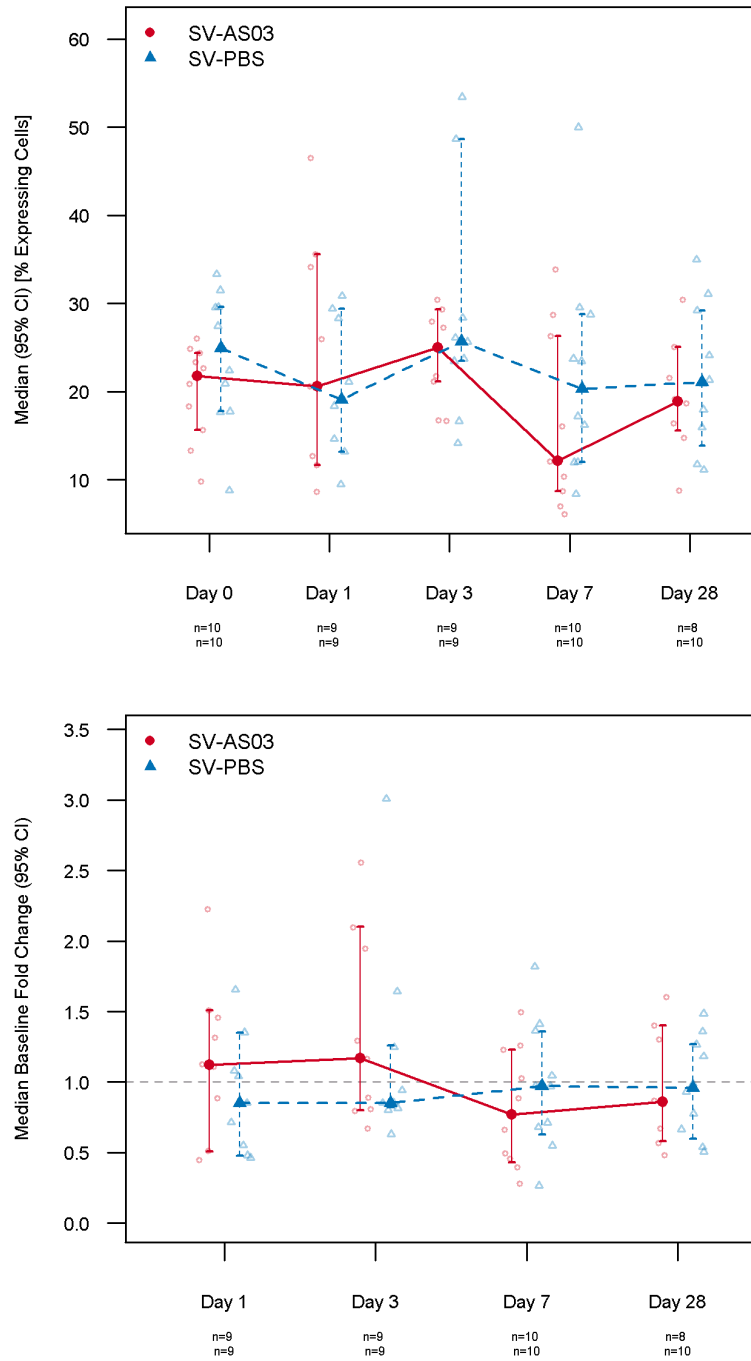

**Figure A198:** Median normalized cell activation plots for CD86 (FACS, Dendritic Cells)

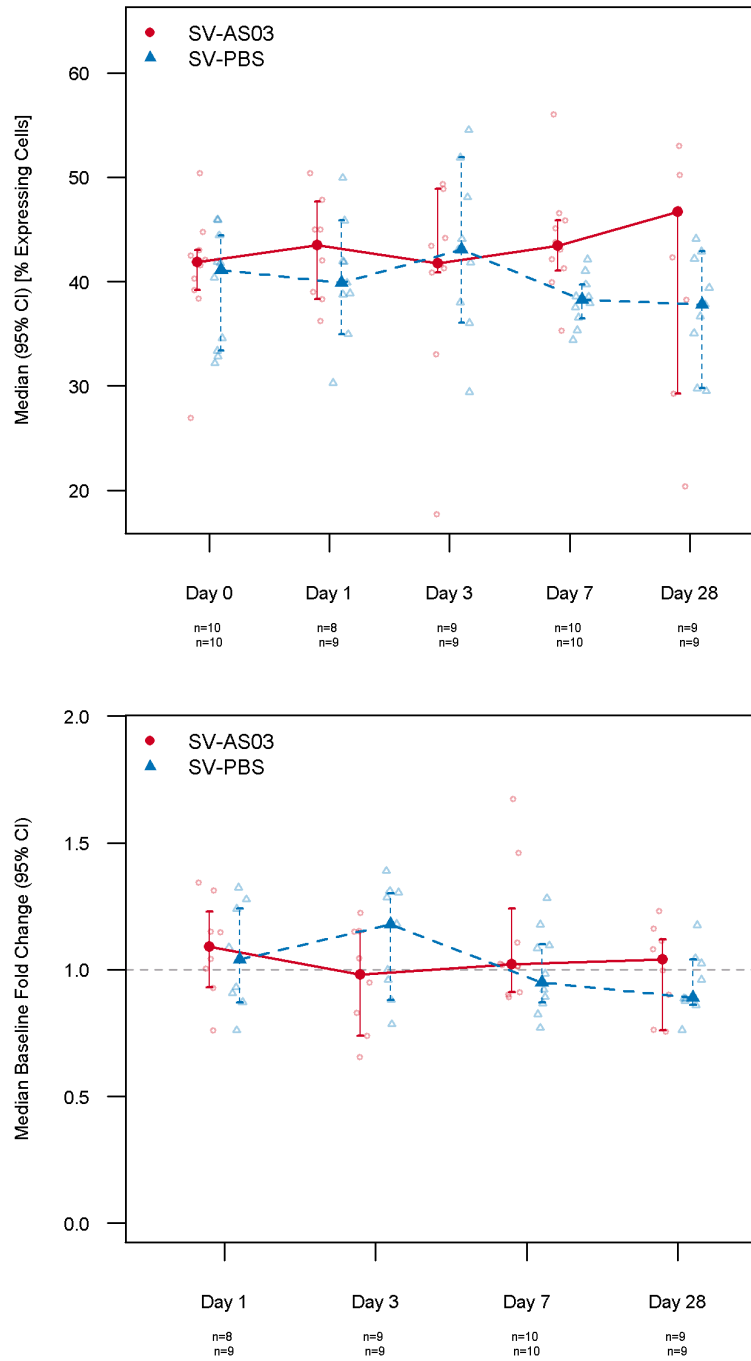

**Figure A199:** Median normalized cell activation plots for CD134 (FACS, Dendritic Cells)

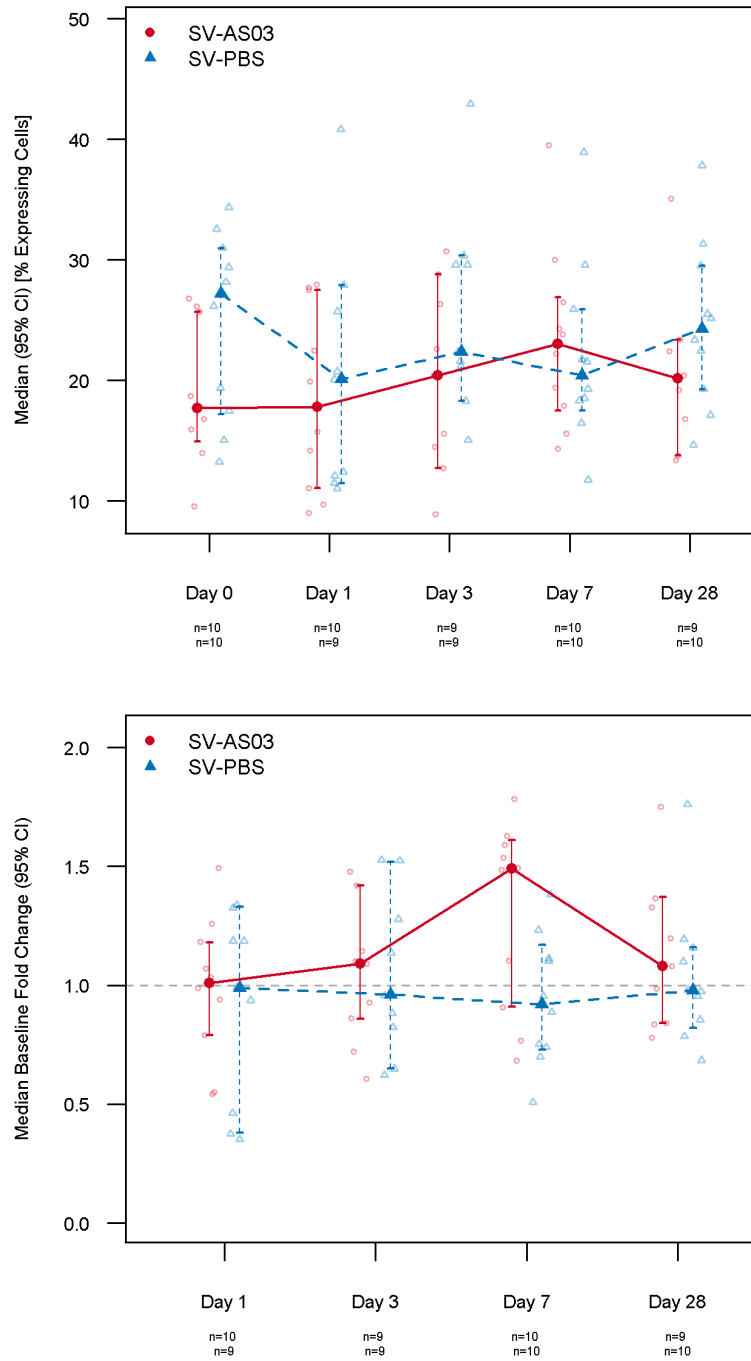

**Figure A200:** Median normalized cell activation plots for CD69 (FACS, Monocytes)



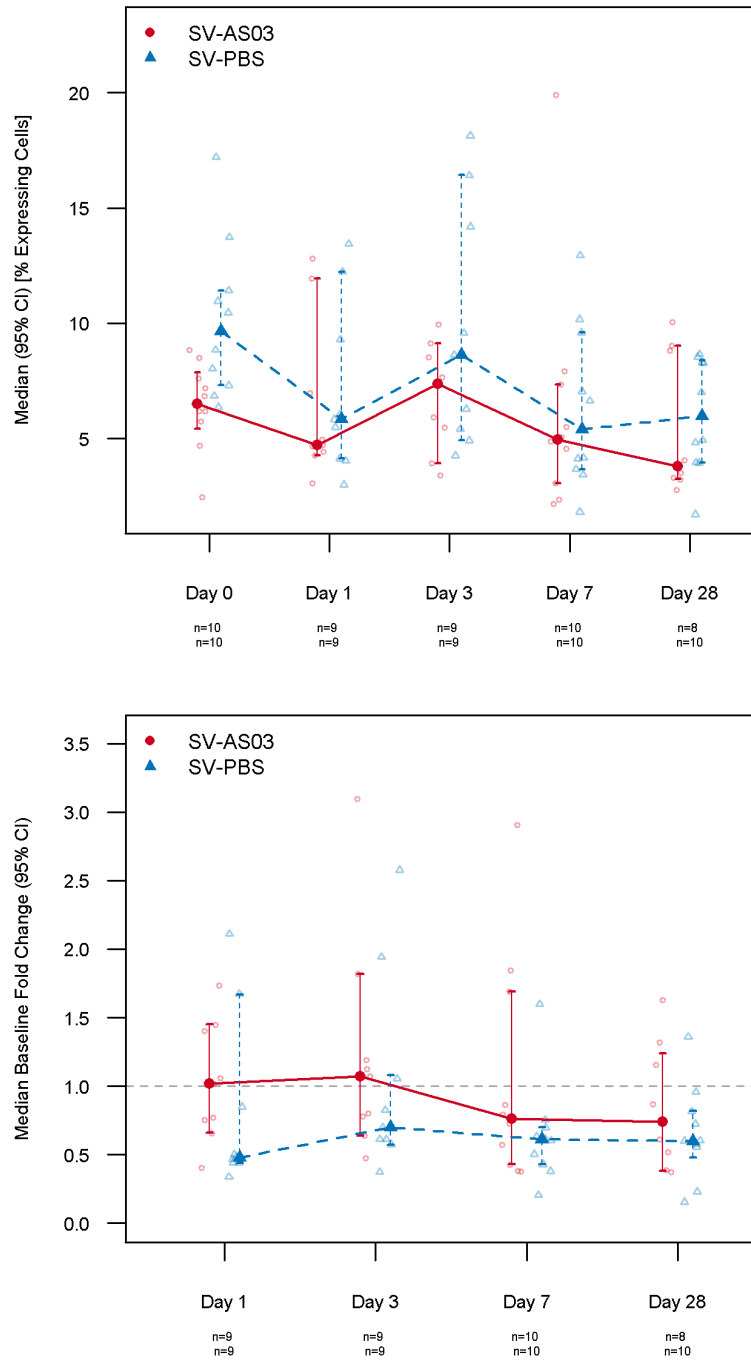

**Figure A201:** Median normalized cell activation plots for CD86 (FACS, Monocytes)

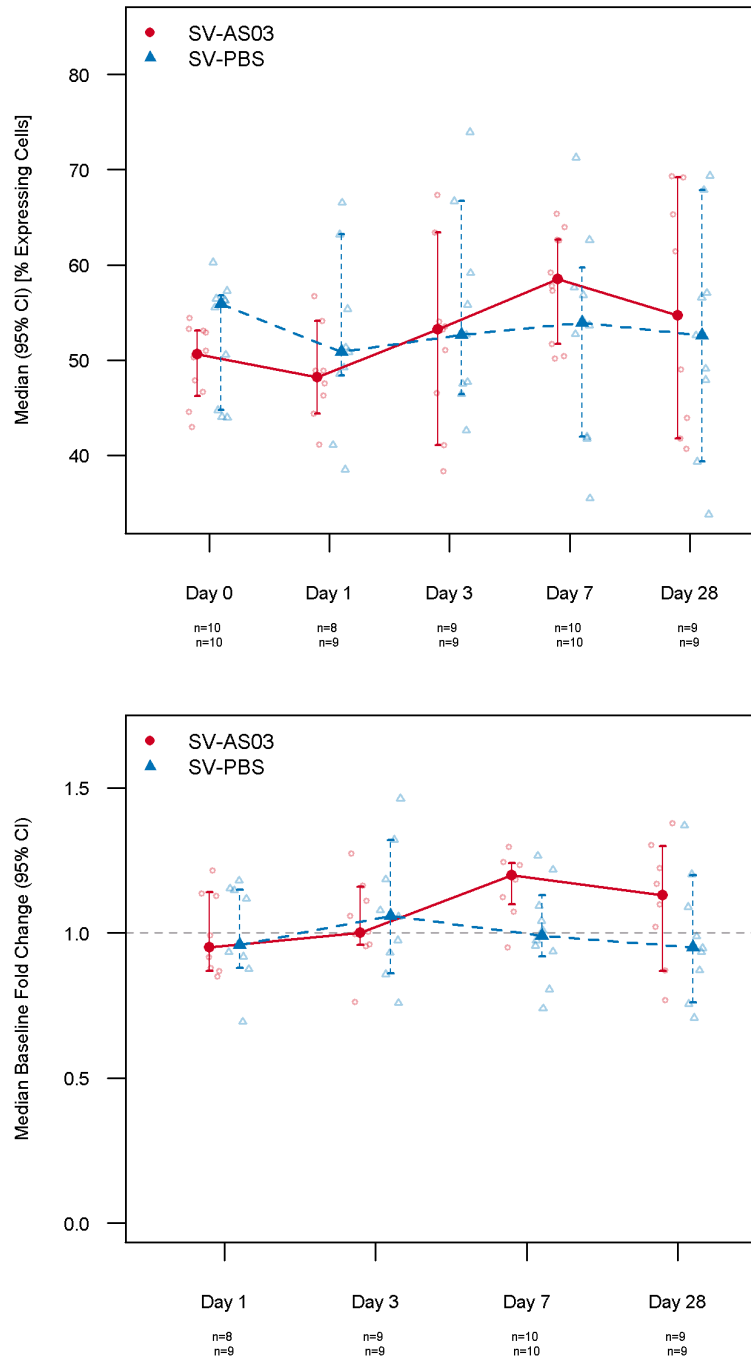

**Figure A202:** Median normalized cell activation plots for CD134 (FACS, Monocytes)

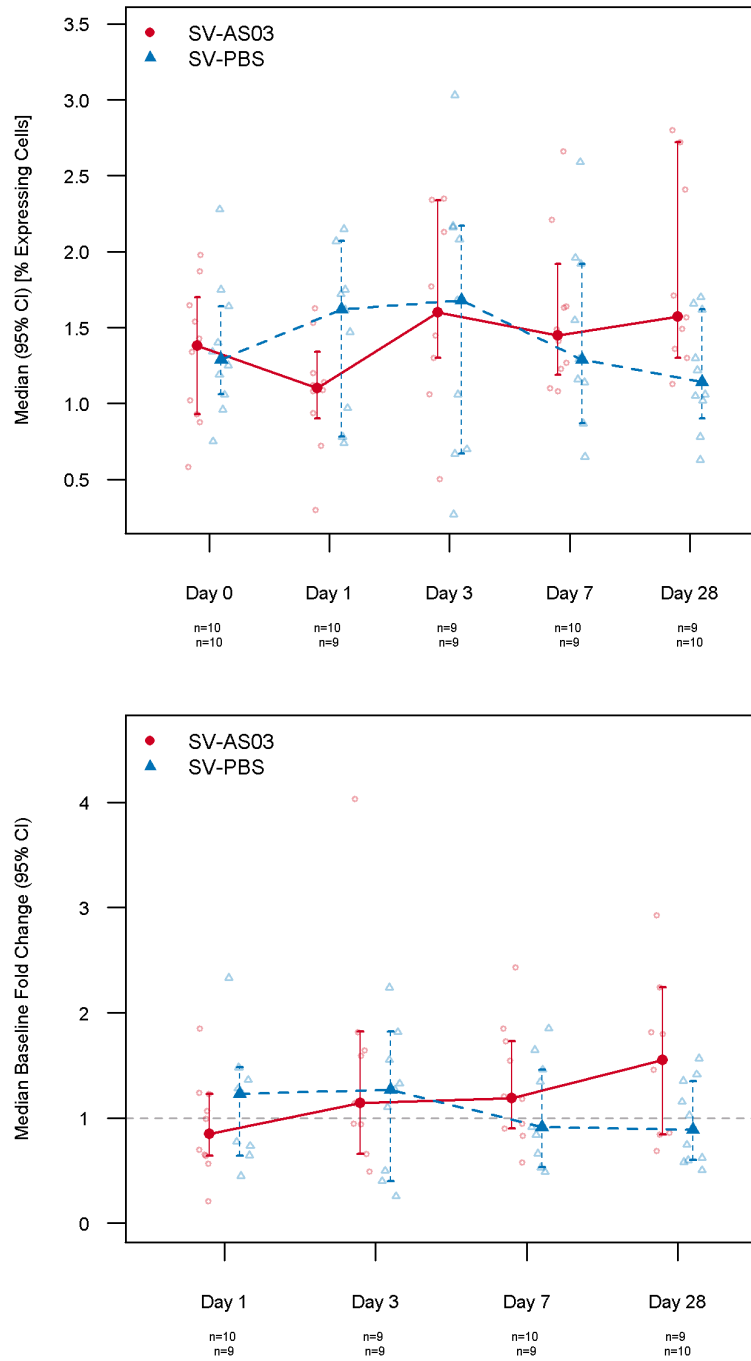

**Figure A203:** Median normalized cell activation plots for CD69 (FACS, Neutrophils)

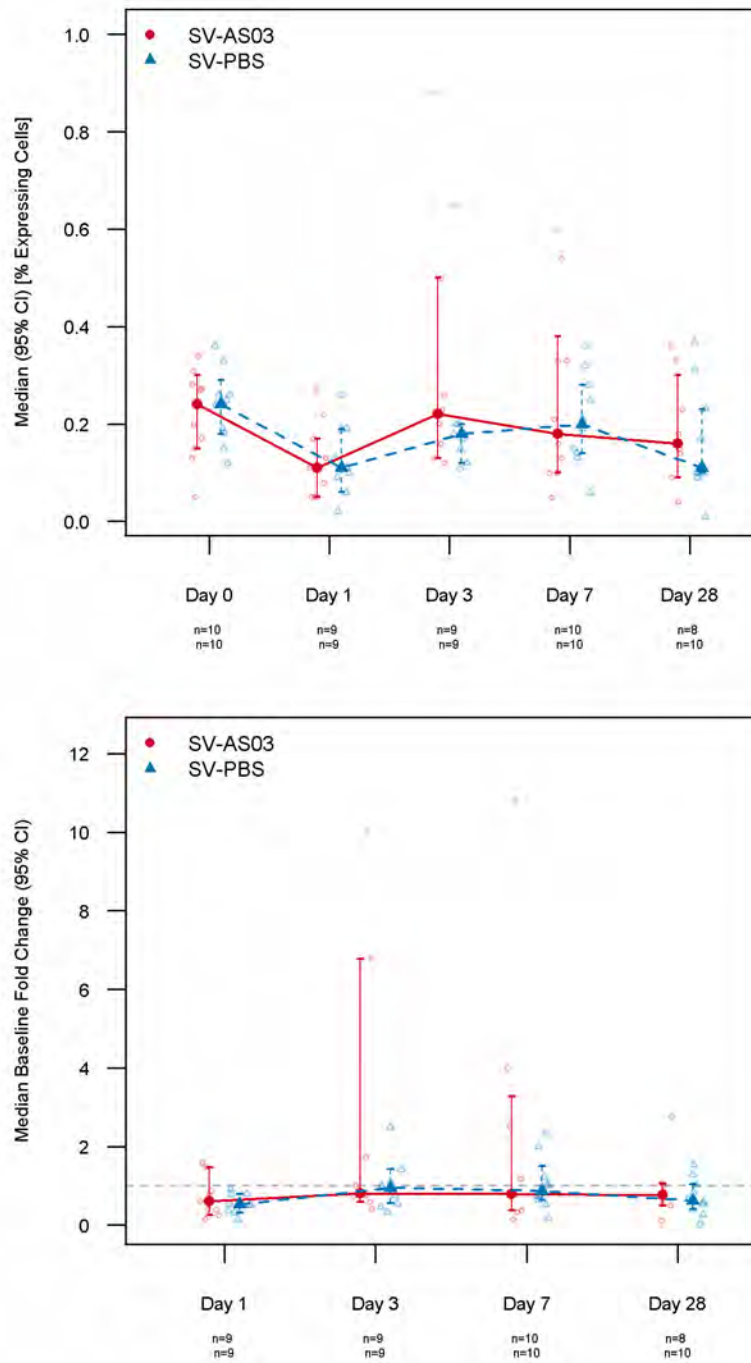

**Figure A204:** Median normalized cell activation plots for CD86 (FACS, Neutrophils)

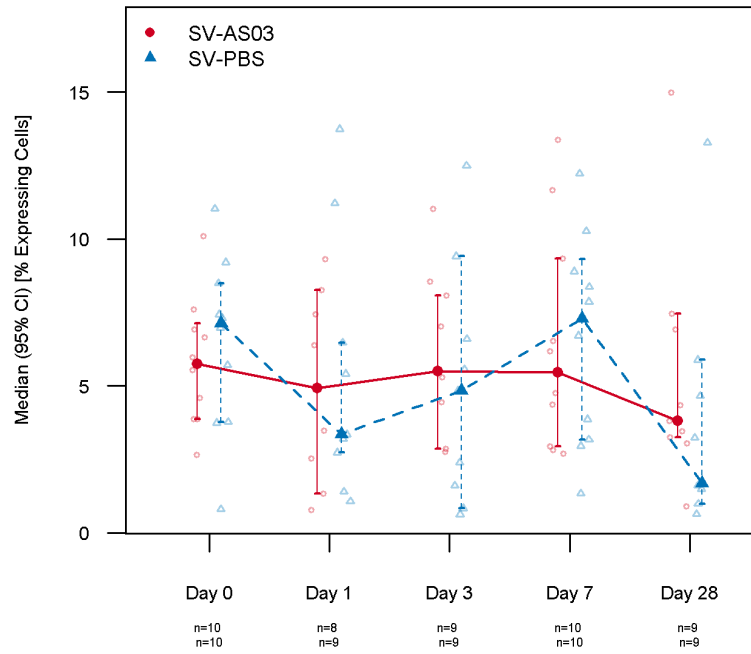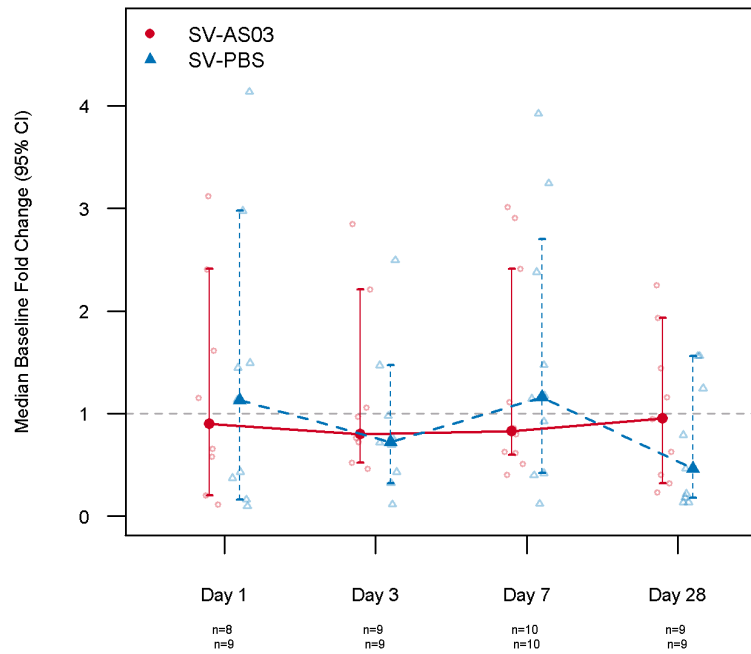

**Figure A205:** Median normalized cell activation plots for CD134 (FACS, Neutrophils)

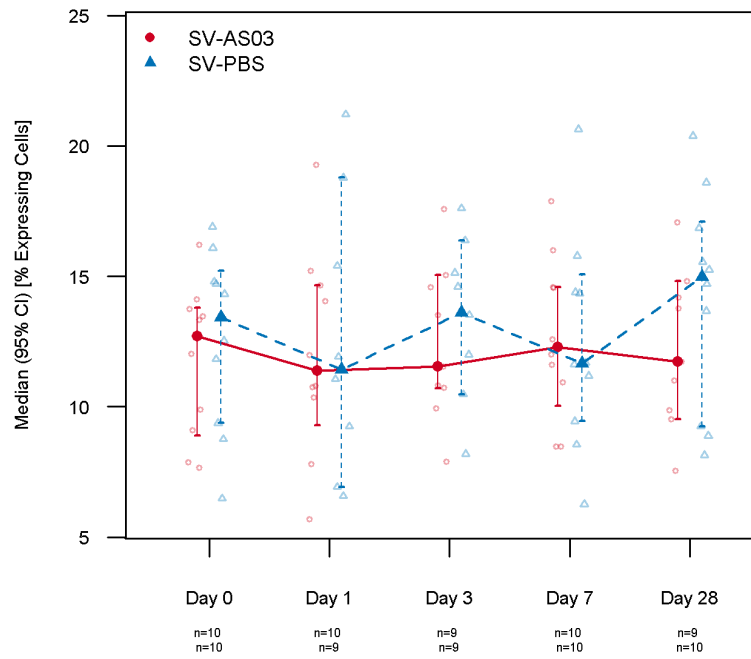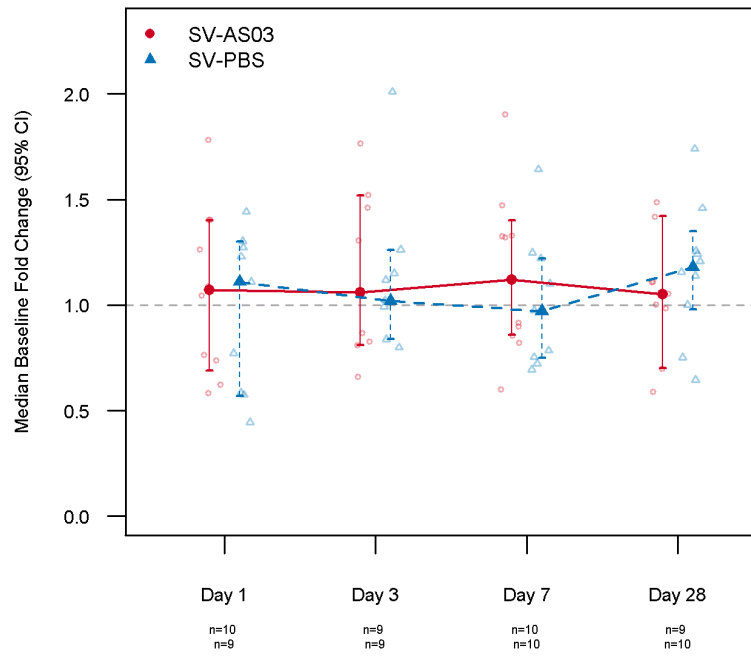

**Figure A206:** Median normalized cell activation plots for CD69 (FACS, NK-Cells)

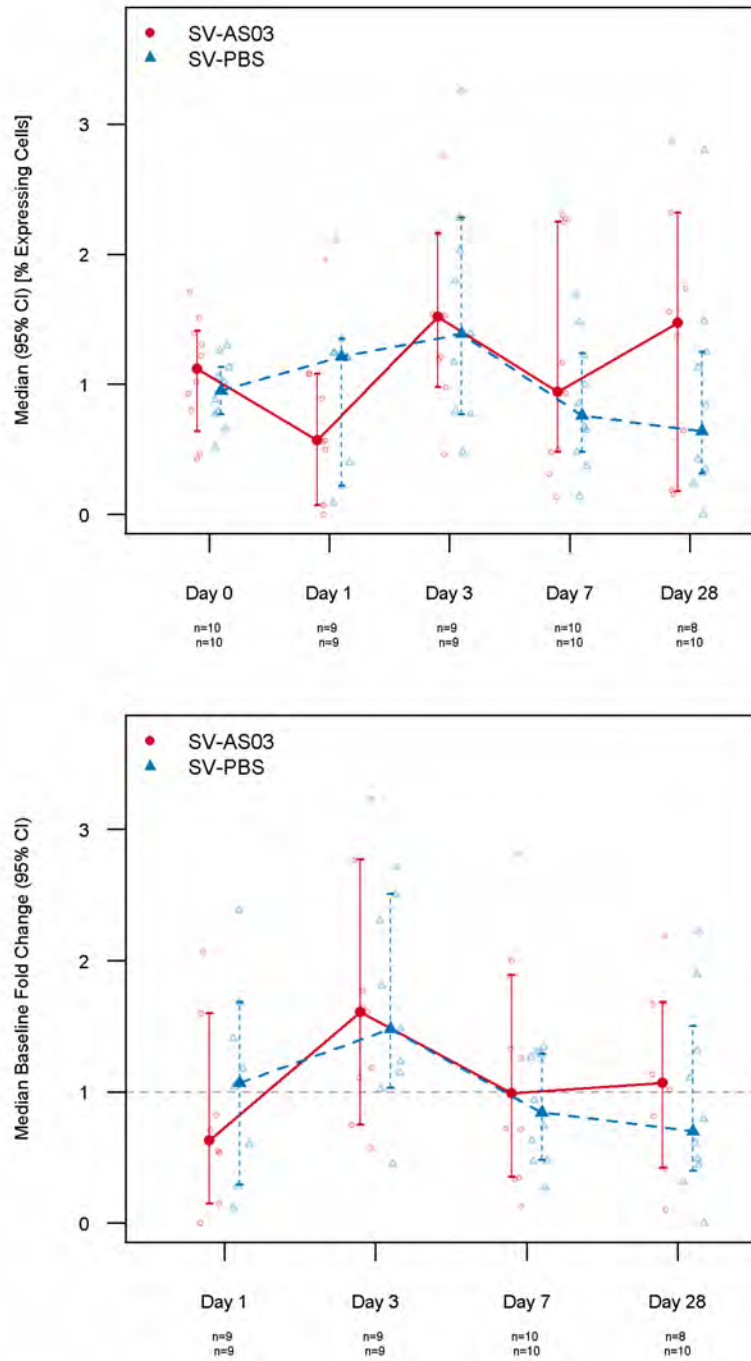

**Figure A207:** Median normalized cell activation plots for CD86 (FACS, NK-Cells)

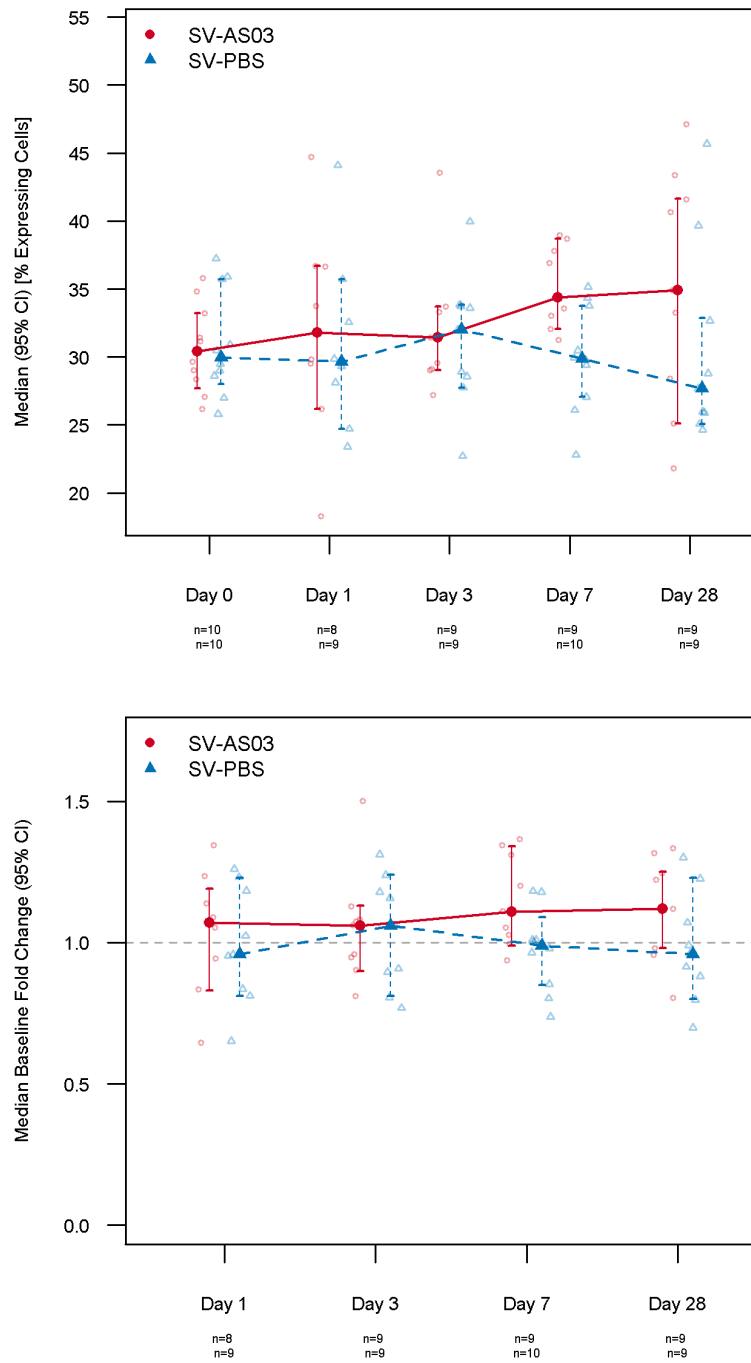

**Figure A208:** Median normalized cell activation plots for CD134 (FACS, NK-Cells)



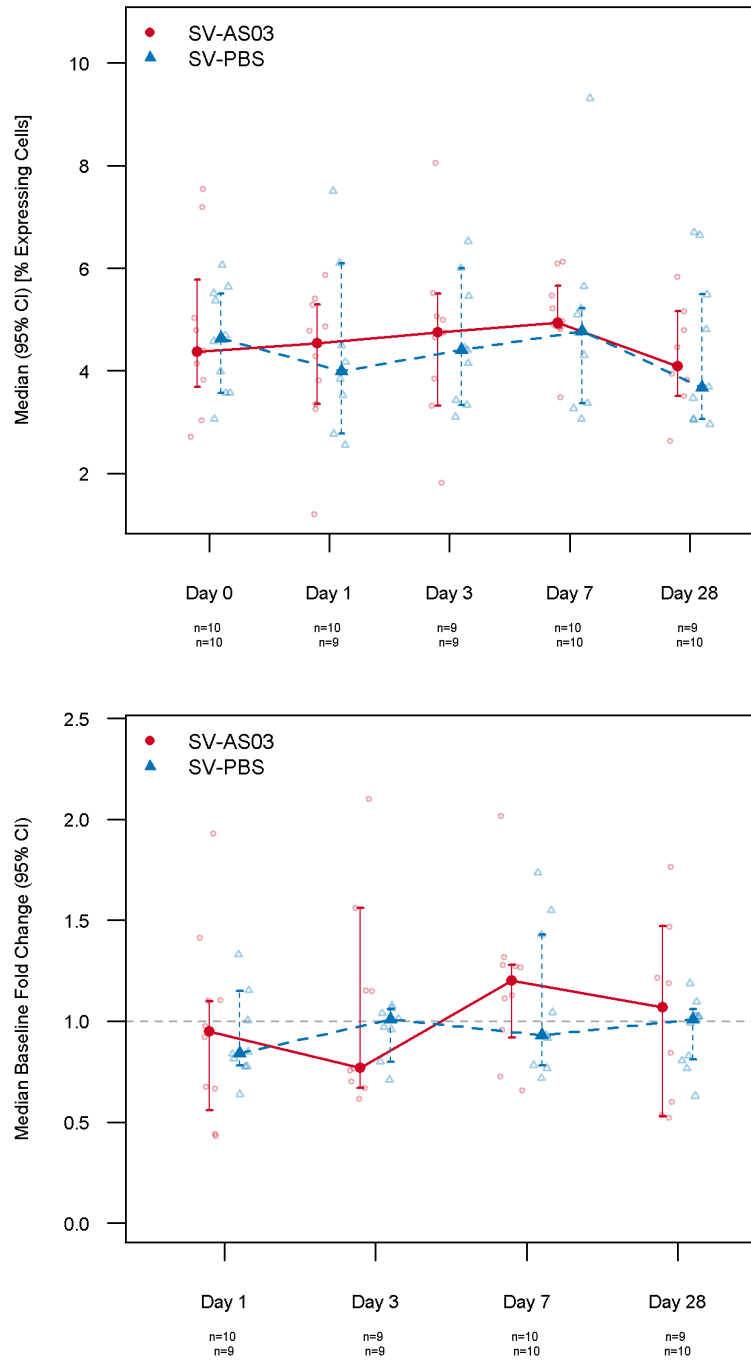

**Figure A209:** Median normalized cell activation plots for CD69 (FACS, T-Cells)

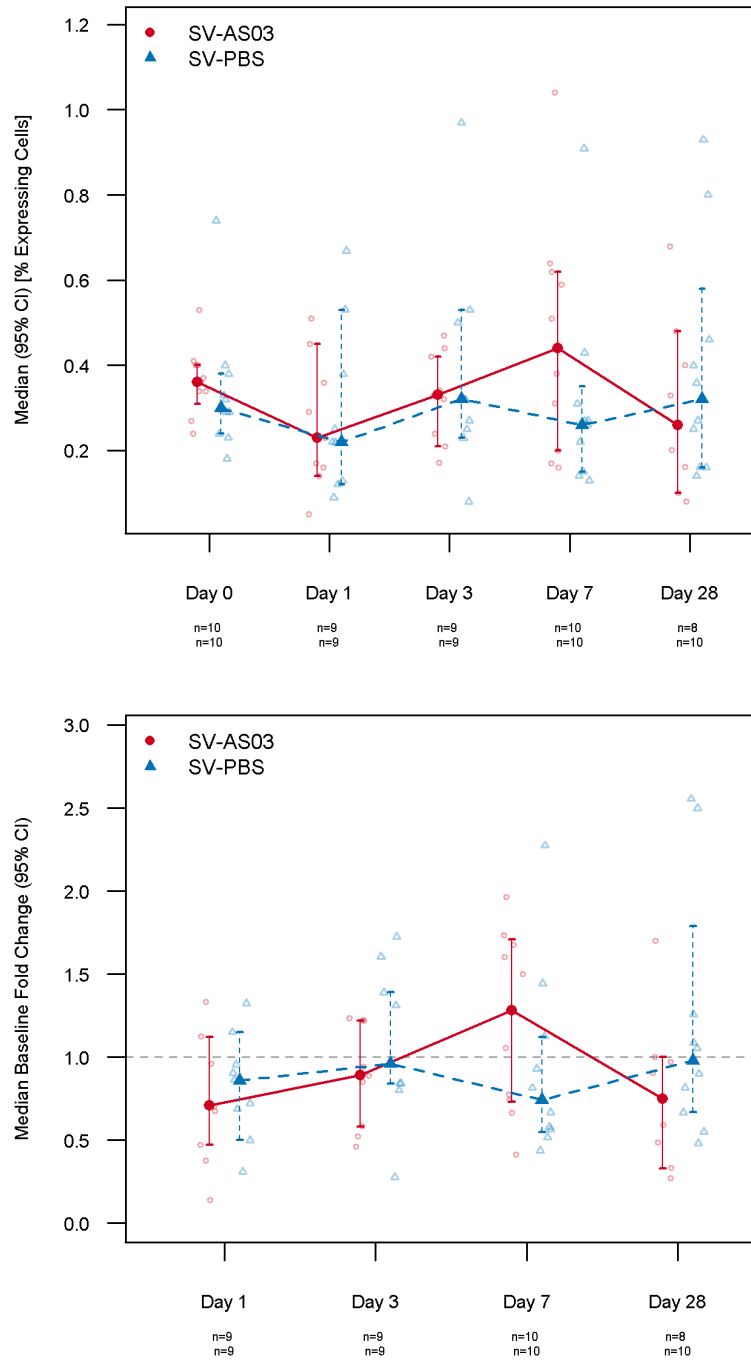

Figure A210: Median normalized cell activation plots for CD86 (FACS, T-Cells)

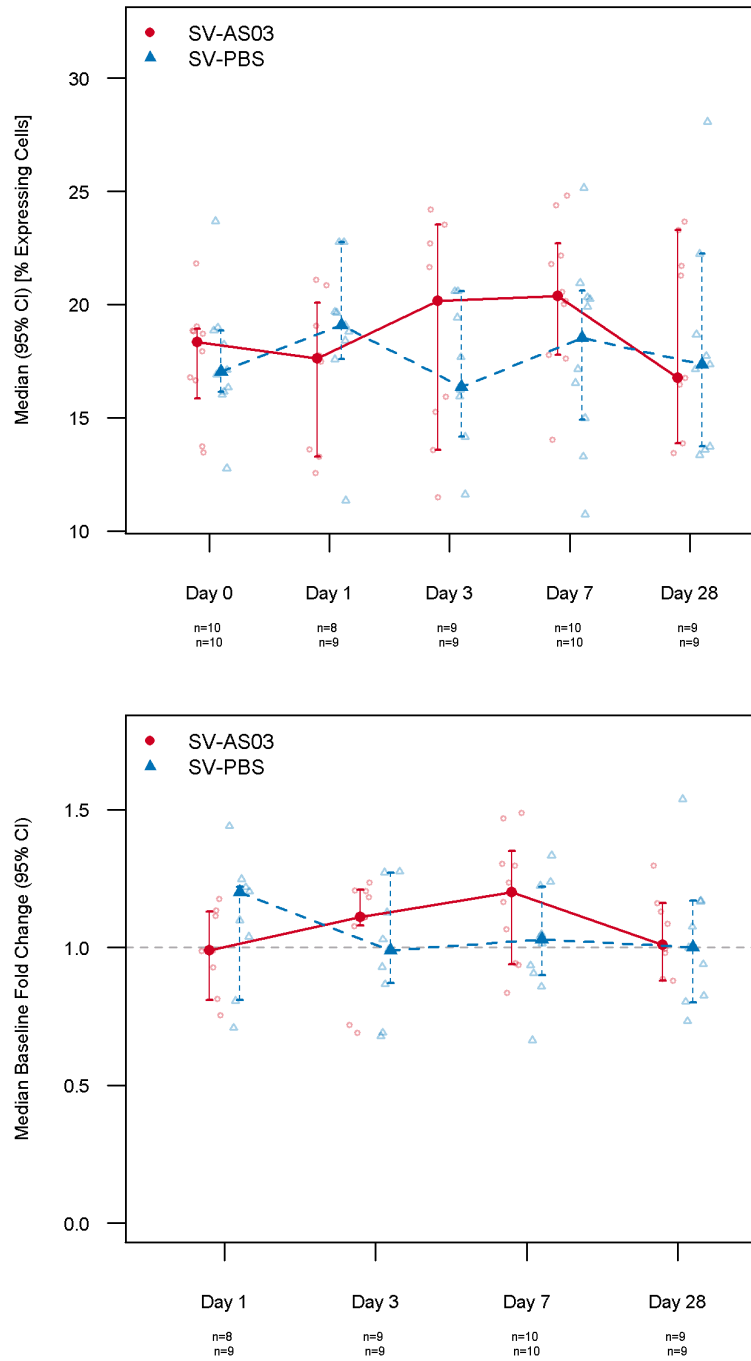

**Figure A211:** Median normalized cell activation plots for CD134 (FACS, T-Cells)

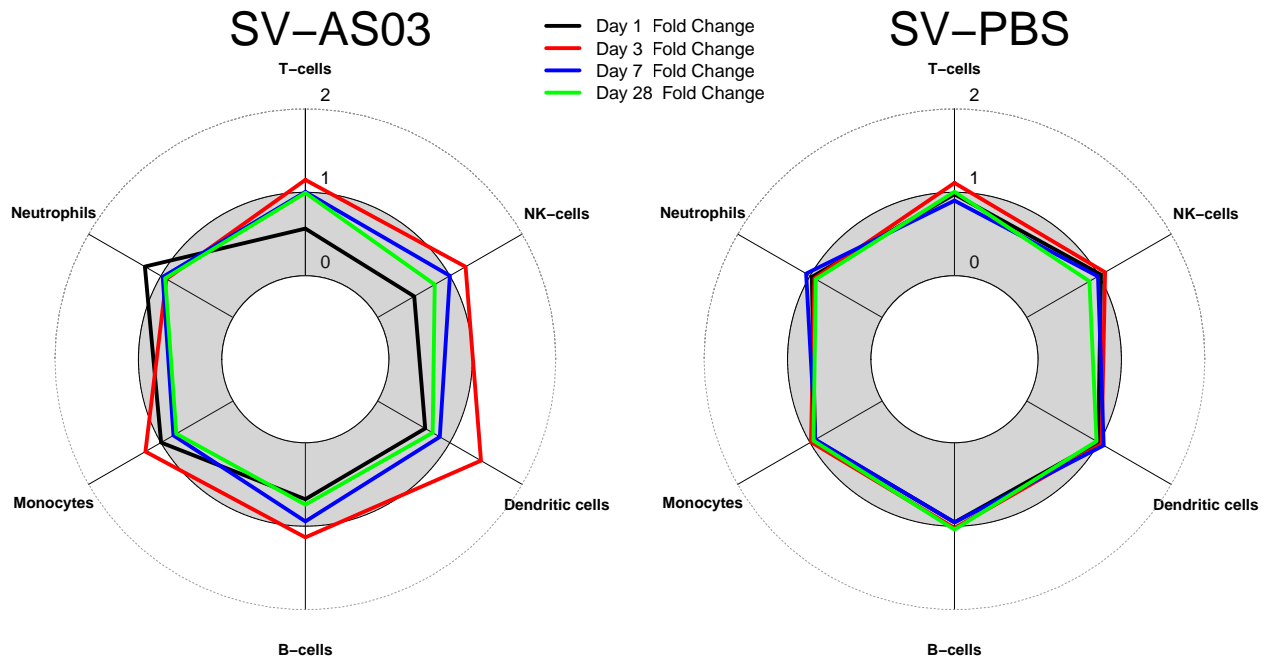

Figure A212: Spider plots of median fold change in the percentage of live cells for each immune cell type.

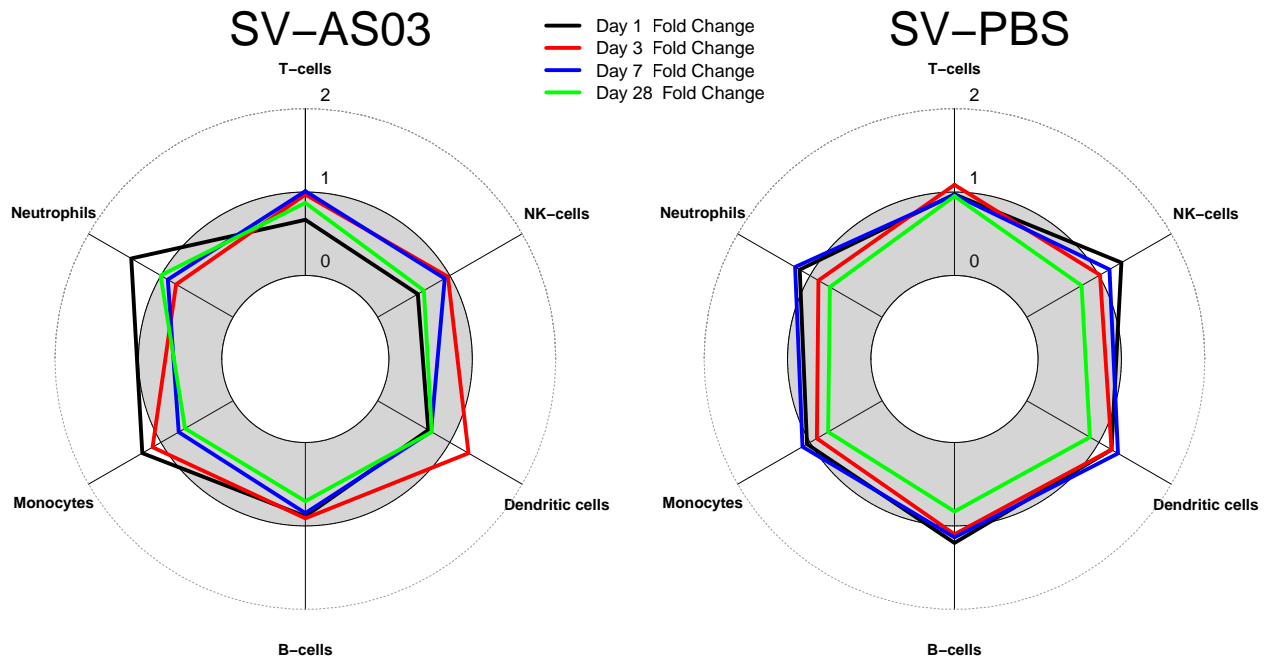

Figure A213: Spider plots of median fold change in the number of live cells per mL for each immune cell type.

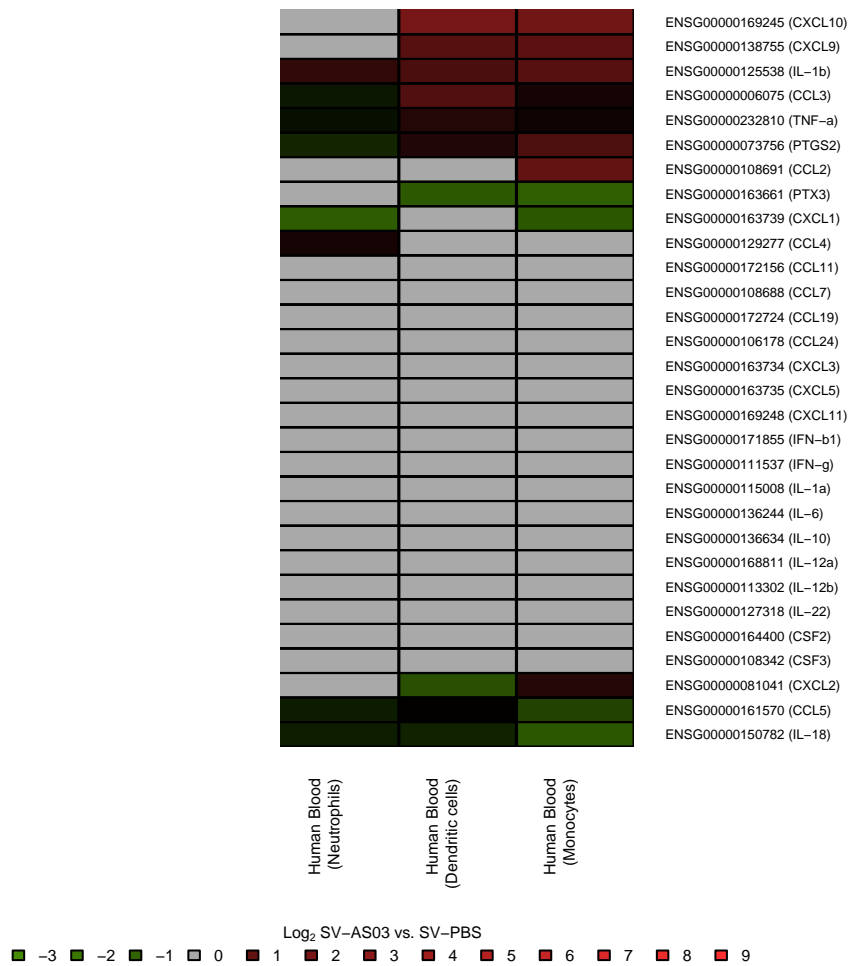

**Figure A214:** Morel et al. (2011) SV-AS03-responsive genes in mouse (RNA-Seq). Genes were mapped from mouse to human using MGI annotations (accessed November 2015). Cells are color-coded by fold change difference (LFCD) between SV-AS03 and SV-PBS vaccine groups. Cells highlighted in grey represent genes that did not meet the minimum expression level cut off.

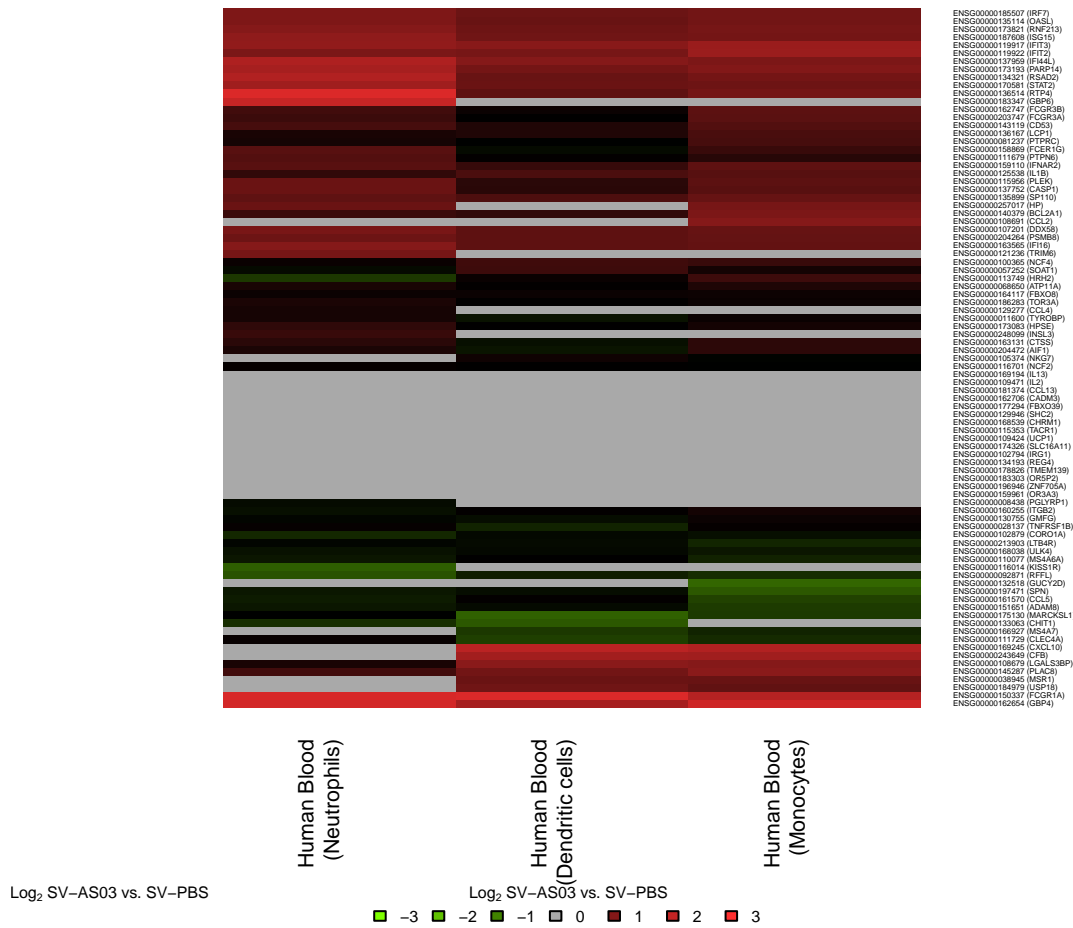

**Figure A215:** Mosca et al. (2008) MF59, CpG, MF59+CpG, and Alum-responsive genes in mouse (RNA-Seq). Adjuvants tested include MF59, CpG, MF59+CpG, and Alum. Genes were mapped from mouse to human using MGI annotations (accessed November 2015). Cells are color-coded by fold change difference (LFC) between SV-AS03 and SV-PBS vaccine groups. Cells highlighted in grey represent genes that did not meet the minimum expression level cut off.

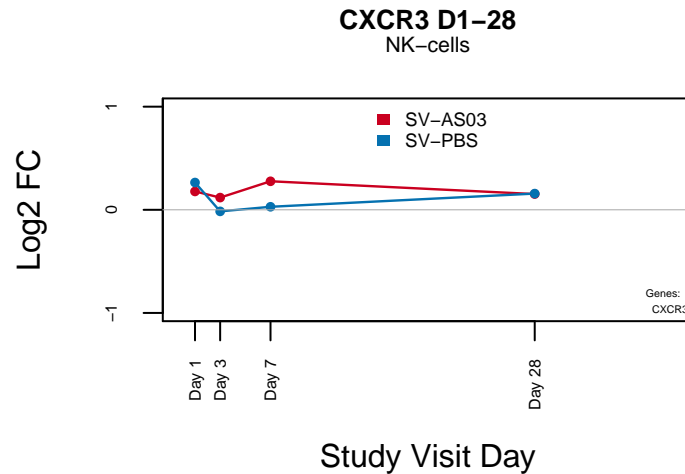

**Figure A216:** Time trends of baseline log fold change for CXCR3 (RNA-Seq, NK-Cells).

## Tables

|                                | All Subjects | SV-AS03      | SV-PBS       |
|--------------------------------|--------------|--------------|--------------|
|                                | (N=20)       | (N=10)       | (N=10)       |
| Gender – N(%)                  |              |              |              |
| Male                           | 9 (45)       | 6 (60)       | 3 (30)       |
| Female                         | 11 (55)      | 4 (40)       | 7 (70)       |
| Ethnicity – N(%)               |              |              |              |
| Non-Hispanic                   | 20 (100)     | 10 (100)     | 10 (100)     |
| Hispanic                       | 0            | 0            | 0            |
| Race – N(%)                    |              |              |              |
| American Indian/Alaskan Native | 0            | 0            | 0            |
| Asian                          | 0            | 0            | 0            |
| Hawaiian/Pacific Islander      | 0            | 0            | 0            |
| Black/African American         | 0            | 0            | 0            |
| White                          | 20 (100)     | 10 (100)     | 10 (100)     |
| Multi-Racial                   | 0            | 0            | 0            |
| Other/Unknown                  | 0            | 0            | 0            |
| Age (years)                    |              |              |              |
| Mean (Standard Deviation)      | 28.3 (5.5)   | 27.4 (5.8)   | 29.3 (5.4)   |
| Median                         | 27.6         | 26.1         | 29.1         |
| Minimum,Maximum                | (19.3, 39.3) | (20.6, 37.8) | (19.3, 39.3) |

**Table A1:** Demographic data by study group

|                               |                              | SV-AS03       |               |                   |                 |               |               |                   |                 |
|-------------------------------|------------------------------|---------------|---------------|-------------------|-----------------|---------------|---------------|-------------------|-----------------|
| Reactogenicity                |                              | Vaccination 1 |               |                   |                 | Vaccination 2 |               |                   |                 |
|                               |                              | None<br>N (%) | Mild<br>N (%) | Moderate<br>N (%) | Severe<br>N (%) | None<br>N (%) | Mild<br>N (%) | Moderate<br>N (%) | Severe<br>N (%) |
| Systemic                      | Elevated Oral Temperature    | 10 (100)      |               |                   |                 | 10 (100)      |               |                   |                 |
|                               | Feverishness                 | 9 (90)        | 1 (10)        |                   |                 | 10 (100)      |               |                   |                 |
|                               | Malaise                      | 7 (70)        | 2 (20)        | 1 (10)            |                 | 7 (70)        | 3 (30)        |                   |                 |
|                               | Myalgia                      | 7 (70)        | 2 (20)        | 1 (10)            |                 | 9 (90)        | 1 (10)        |                   |                 |
|                               | Headache                     | 5 (50)        | 5 (50)        |                   |                 | 7 (70)        | 2 (20)        | 1 (10)            |                 |
|                               | Nausea                       | 10 (100)      |               |                   |                 | 10 (100)      |               |                   |                 |
|                               | Chills                       | 10 (100)      |               |                   |                 | 10 (100)      |               |                   |                 |
|                               | Arthralgia                   | 10 (100)      |               |                   |                 | 10 (100)      |               |                   |                 |
|                               | Shivering                    | 10 (100)      |               |                   |                 | 10 (100)      |               |                   |                 |
|                               | Asthenia                     | 8 (80)        | 1 (10)        | 1 (10)            |                 | 8 (80)        | 2 (20)        |                   |                 |
| Any Systemic Symptoms (Total) |                              | 4 (40)        | 5 (50)        | 1 (10)            |                 | 5 (50)        | 4 (40)        | 1 (10)            |                 |
| Local                         | Pain                         | 1 (10)        | 7 (70)        | 2 (20)            |                 | 2 (20)        | 8 (80)        |                   |                 |
|                               | Tenderness                   | 2 (20)        | 7 (70)        | 1 (10)            |                 | 4 (40)        | 6 (60)        |                   |                 |
|                               | Redness                      | 10 (100)      |               |                   |                 | 9 (90)        | 1 (10)        |                   |                 |
|                               | Redness (Measurement grade)  | 10 (100)      |               |                   |                 | 9 (90)        | 1 (10)        |                   |                 |
|                               | Swelling                     | 9 (90)        |               | 1 (10)            |                 | 9 (90)        | 1 (10)        |                   |                 |
|                               | Swelling (Measurement grade) | 10 (100)      |               |                   |                 | 10 (100)      |               |                   |                 |
|                               | Any Local Symptoms (Total)   |               | 1 (10)        | 7 (70)            | 2 (20)          |               | 2 (20)        | 8 (80)            |                 |
| Any                           | Any Symptoms                 | 1 (10)        | 7 (70)        | 2 (20)            |                 | 2 (20)        | 7 (70)        | 1 (10)            |                 |

**Table A2:** Maximum severity of solicited adverse events by vaccination (SV-AS03)



|                |                               | SV-PBS        |               |                   |                 |               |               |                   |                 |
|----------------|-------------------------------|---------------|---------------|-------------------|-----------------|---------------|---------------|-------------------|-----------------|
| Reactogenicity |                               | Vaccination 1 |               |                   |                 | Vaccination 2 |               |                   |                 |
|                |                               | None<br>N (%) | Mild<br>N (%) | Moderate<br>N (%) | Severe<br>N (%) | None<br>N (%) | Mild<br>N (%) | Moderate<br>N (%) | Severe<br>N (%) |
| Systemic       | Elevated Oral Temperature     | 10 (100)      |               |                   |                 | 10 (100)      |               |                   |                 |
|                | Feverishness                  | 9 (90)        | 1 (10)        |                   |                 | 9 (90)        | 1 (10)        |                   |                 |
|                | Malaise                       | 7 (70)        | 2 (20)        | 1 (10)            |                 | 9 (90)        | 1 (10)        |                   |                 |
|                | Myalgia                       | 9 (90)        |               | 1 (10)            |                 | 9 (90)        | 1 (10)        |                   |                 |
|                | Headache                      | 9 (90)        | 1 (10)        |                   |                 | 9 (90)        | 1 (10)        |                   |                 |
|                | Nausea                        | 9 (90)        | 1 (10)        |                   |                 | 10 (100)      |               |                   |                 |
|                | Chills                        | 10 (100)      |               |                   |                 | 10 (100)      |               |                   |                 |
|                | Arthralgia                    | 9 (90)        | 1 (10)        |                   |                 | 9 (90)        | 1 (10)        |                   |                 |
|                | Shivering                     | 10 (100)      |               |                   |                 | 10 (100)      |               |                   |                 |
|                | Asthenia                      | 9 (90)        | 1 (10)        |                   |                 | 10 (100)      |               |                   |                 |
|                | Any Systemic Symptoms (Total) | 6 (60)        | 2 (20)        | 2 (20)            |                 | 7 (70)        | 3 (30)        |                   |                 |
| Local          | Pain                          | 8 (80)        | 2 (20)        |                   |                 | 9 (90)        | 1 (10)        |                   |                 |
|                | Tenderness                    | 7 (70)        | 3 (30)        |                   |                 | 10 (100)      |               |                   |                 |
|                | Redness                       | 10 (100)      |               |                   |                 | 10 (100)      |               |                   |                 |
|                | Redness (Measurement grade)   | 10 (100)      |               |                   |                 | 10 (100)      |               |                   |                 |
|                | Swelling                      | 10 (100)      |               |                   |                 | 10 (100)      |               |                   |                 |
|                | Swelling (Measurement grade)  | 10 (100)      |               |                   |                 | 10 (100)      |               |                   |                 |
|                | Any Local Symptoms (Total)    | 6 (60)        | 4 (40)        |                   |                 | 9 (90)        | 1 (10)        |                   |                 |
| Any            | Any Symptoms                  | 5 (50)        | 3 (30)        | 2 (20)            |                 | 7 (70)        | 3 (30)        |                   |                 |

**Table A3:** Maximum severity of solicited adverse events by vaccination (SV-PBS)

| Study Arm     | Study Visit       | N  | GMT (95% CI)        | SD   | Number of Responders (Titer $\geq$ 1:40) | Proportion of Responder (95% CI) (titer $\geq$ 1:40) | Number of Responders (Titer $\geq$ 1:40 and 4-fold change from baseline) | Proportion of Responders (95% CI) (Titer $\geq$ 1:40 and 4 fold change from base-line) |
|---------------|-------------------|----|---------------------|------|------------------------------------------|------------------------------------------------------|--------------------------------------------------------------------------|----------------------------------------------------------------------------------------|
| All Sub-jects | Pre-Vaccination   | 20 | 5.0 (-)             | -    | 0                                        | 0.00 (0.00, 0.17)                                    | -                                                                        | -                                                                                      |
| All Sub-jects | Day 1 Post Vac 1  | 20 | 5.0 (-)             | -    | 0                                        | 0.00 (0.00, 0.17)                                    | 0                                                                        | 0.00 (0.00, 0.17)                                                                      |
| All Sub-jects | Day 3 Post Vac 1  | 20 | 5.0 (-)             | -    | 0                                        | 0.00 (0.00, 0.17)                                    | 0                                                                        | 0.00 (0.00, 0.17)                                                                      |
| All Sub-jects | Day 7 Post Vac 1  | 20 | 5.0 (-)             | -    | 0                                        | 0.00 (0.00, 0.17)                                    | 0                                                                        | 0.00 (0.00, 0.17)                                                                      |
| All Sub-jects | Day 28 Post Vac 1 | 20 | 6.8 (5.0, 9.3)      | 0.66 | 1                                        | 0.05 (0.00, 0.25)                                    | 1                                                                        | 0.05 (0.00, 0.25)                                                                      |
| All Sub-jects | Day 28 Post Vac 2 | 20 | 31.4 (14.4, 68.4)   | 1.66 | 9                                        | 0.45 (0.23, 0.68)                                    | 9                                                                        | 0.45 (0.23, 0.68)                                                                      |
| SV-AS03       | Pre-Vaccination   | 10 | 5.0 (-)             | -    | 0                                        | 0.00 (0.00, 0.31)                                    | -                                                                        | -                                                                                      |
| SV-AS03       | Day 1 Post Vac 1  | 10 | 5.0 (-)             | -    | 0                                        | 0.00 (0.00, 0.31)                                    | 0                                                                        | 0.00 (0.00, 0.31)                                                                      |
| SV-AS03       | Day 3 Post Vac 1  | 10 | 5.0 (-)             | -    | 0                                        | 0.00 (0.00, 0.31)                                    | 0                                                                        | 0.00 (0.00, 0.31)                                                                      |
| SV-AS03       | Day 7 Post Vac 1  | 10 | 5.0 (-)             | -    | 0                                        | 0.00 (0.00, 0.31)                                    | 0                                                                        | 0.00 (0.00, 0.31)                                                                      |
| SV-AS03       | Day 28 Post Vac 1 | 10 | 9.0 (4.9, 16.7)     | 0.86 | 1                                        | 0.10 (0.00, 0.45)                                    | 1                                                                        | 0.10 (0.00, 0.45)                                                                      |
| SV-AS03       | Day 28 Post Vac 2 | 10 | 130.0 (63.1, 267.6) | 1.01 | 9                                        | 0.90 (0.55, 1.00)                                    | 9                                                                        | 0.90 (0.55, 1.00)                                                                      |
| SV-PBS        | Pre-Vaccination   | 10 | 5.0 (-)             | -    | 0                                        | 0.00 (0.00, 0.31)                                    | -                                                                        | -                                                                                      |
| SV-PBS        | Day 1 Post Vac 1  | 10 | 5.0 (-)             | -    | 0                                        | 0.00 (0.00, 0.31)                                    | 0                                                                        | 0.00 (0.00, 0.31)                                                                      |
| SV-PBS        | Day 3 Post Vac 1  | 10 | 5.0 (-)             | -    | 0                                        | 0.00 (0.00, 0.31)                                    | 0                                                                        | 0.00 (0.00, 0.31)                                                                      |
| SV-PBS        | Day 7 Post Vac 1  | 10 | 5.0 (-)             | -    | 0                                        | 0.00 (0.00, 0.31)                                    | 0                                                                        | 0.00 (0.00, 0.31)                                                                      |
| SV-PBS        | Day 28 Post Vac 1 | 10 | 5.2 (4.8, 5.6)      | 0.11 | 0                                        | 0.00 (0.00, 0.31)                                    | 0                                                                        | 0.00 (0.00, 0.31)                                                                      |
| SV-PBS        | Day 28 Post Vac 2 | 10 | 7.6 (5.0, 11.5)     | 0.58 | 0                                        | 0.00 (0.00, 0.31)                                    | 0                                                                        | 0.00 (0.00, 0.31)                                                                      |

**Table A4:** Intend-to-treat population. Summary of hemagglutination inhibition titer/responses against A/Indonesia/05/2005 by study arm and visit (Immunogenicity). SD: standard deviation on the log scale.

| Study Arm    | Study Visit       | N  | GMT (95% CI)        | SD   | Number of Responders (Titer $\geq$ 1:40) | Proportion of Responder (95% CI) (titer $\geq$ 1:40) | Number of Responders (Titer $\geq$ 1:40 and 4-fold change from baseline) | Proportion of Responders (95% CI) (Titer $\geq$ 1:40 and 4 fold change from base-line) |
|--------------|-------------------|----|---------------------|------|------------------------------------------|------------------------------------------------------|--------------------------------------------------------------------------|----------------------------------------------------------------------------------------|
| All Subjects | Pre-Vaccination   | 20 | 5.0 (-)             | -    | 0                                        | 0.00 (0.00, 0.17)                                    | -                                                                        | -                                                                                      |
| All Subjects | Day 1 Post Vac 1  | 20 | 5.0 (-)             | -    | 0                                        | 0.00 (0.00, 0.17)                                    | 0                                                                        | 0.00 (0.00, 0.17)                                                                      |
| All Subjects | Day 3 Post Vac 1  | 20 | 5.0 (-)             | -    | 0                                        | 0.00 (0.00, 0.17)                                    | 0                                                                        | 0.00 (0.00, 0.17)                                                                      |
| All Subjects | Day 7 Post Vac 1  | 20 | 5.0 (-)             | -    | 0                                        | 0.00 (0.00, 0.17)                                    | 0                                                                        | 0.00 (0.00, 0.17)                                                                      |
| All Subjects | Day 28 Post Vac 1 | 19 | 6.8 (4.9, 9.5)      | 0.68 | 1                                        | 0.05 (0.00, 0.26)                                    | 1                                                                        | 0.05 (0.00, 0.26)                                                                      |
| All Subjects | Day 28 Post Vac 2 | 19 | 29.3 (13.0, 66.0)   | 1.68 | 8                                        | 0.42 (0.20, 0.67)                                    | 8                                                                        | 0.42 (0.20, 0.67)                                                                      |
| SV-AS03      | Pre-Vaccination   | 10 | 5.0 (-)             | -    | 0                                        | 0.00 (0.00, 0.31)                                    | -                                                                        | -                                                                                      |
| SV-AS03      | Day 1 Post Vac 1  | 10 | 5.0 (-)             | -    | 0                                        | 0.00 (0.00, 0.31)                                    | 0                                                                        | 0.00 (0.00, 0.31)                                                                      |
| SV-AS03      | Day 3 Post Vac 1  | 10 | 5.0 (-)             | -    | 0                                        | 0.00 (0.00, 0.31)                                    | 0                                                                        | 0.00 (0.00, 0.31)                                                                      |
| SV-AS03      | Day 7 Post Vac 1  | 10 | 5.0 (-)             | -    | 0                                        | 0.00 (0.00, 0.31)                                    | 0                                                                        | 0.00 (0.00, 0.31)                                                                      |
| SV-AS03      | Day 28 Post Vac 1 | 9  | 9.3 (4.6, 18.7)     | 0.91 | 1                                        | 0.11 (0.00, 0.48)                                    | 1                                                                        | 0.11 (0.00, 0.48)                                                                      |
| SV-AS03      | Day 28 Post Vac 2 | 9  | 132.0 (58.0, 300.3) | 1.07 | 8                                        | 0.89 (0.52, 1.00)                                    | 8                                                                        | 0.89 (0.52, 1.00)                                                                      |
| SV-PBS       | Pre-Vaccination   | 10 | 5.0 (-)             | -    | 0                                        | 0.00 (0.00, 0.31)                                    | -                                                                        | -                                                                                      |
| SV-PBS       | Day 1 Post Vac 1  | 10 | 5.0 (-)             | -    | 0                                        | 0.00 (0.00, 0.31)                                    | 0                                                                        | 0.00 (0.00, 0.31)                                                                      |
| SV-PBS       | Day 3 Post Vac 1  | 10 | 5.0 (-)             | -    | 0                                        | 0.00 (0.00, 0.31)                                    | 0                                                                        | 0.00 (0.00, 0.31)                                                                      |
| SV-PBS       | Day 7 Post Vac 1  | 10 | 5.0 (-)             | -    | 0                                        | 0.00 (0.00, 0.31)                                    | 0                                                                        | 0.00 (0.00, 0.31)                                                                      |
| SV-PBS       | Day 28 Post Vac 1 | 10 | 5.2 (4.8, 5.6)      | 0.11 | 0                                        | 0.00 (0.00, 0.31)                                    | 0                                                                        | 0.00 (0.00, 0.31)                                                                      |
| SV-PBS       | Day 28 Post Vac 2 | 10 | 7.6 (5.0, 11.5)     | 0.58 | 0                                        | 0.00 (0.00, 0.31)                                    | 0                                                                        | 0.00 (0.00, 0.31)                                                                      |

**Table A5:** Per-protocol population. Summary of hemagglutination inhibition titer/responses against A/Indonesia/05/2005 by study arm and visit (Immunogenicity). SD: standard deviation on the log scale.

| Study Arm    | Study Visit       | N  | GMT (95% CI)          | SD   | Number of Responders (Titer $\geq$ 1:40) | Proportion of Responder (95% CI) (titer $\geq$ 1:40) | Number of Responders (Titer $\geq$ 1:40 and 4-fold change from baseline) | Proportion of Responders (95% CI) (Titer $\geq$ 1:40 and 4 fold change from base-line) |
|--------------|-------------------|----|-----------------------|------|------------------------------------------|------------------------------------------------------|--------------------------------------------------------------------------|----------------------------------------------------------------------------------------|
| All Subjects | Pre-Vaccination   | 20 | 6.5 (5.3, 8.0)        | 0.45 | 0                                        | 0.00 (0.00, 0.17)                                    | -                                                                        | -                                                                                      |
| All Subjects | Day 1 Post Vac 1  | 20 | 6.3 (5.0, 7.8)        | 0.47 | 0                                        | 0.00 (0.00, 0.17)                                    | 0                                                                        | 0.00 (0.00, 0.17)                                                                      |
| All Subjects | Day 3 Post Vac 1  | 20 | 5.7 (5.0, 6.6)        | 0.28 | 0                                        | 0.00 (0.00, 0.17)                                    | 0                                                                        | 0.00 (0.00, 0.17)                                                                      |
| All Subjects | Day 7 Post Vac 1  | 20 | 8.1 (6.3, 10.5)       | 0.54 | 1                                        | 0.05 (0.00, 0.25)                                    | 1                                                                        | 0.05 (0.00, 0.25)                                                                      |
| All Subjects | Day 28 Post Vac 1 | 19 | 16.7 (11.3, 24.6)     | 0.80 | 4                                        | 0.21 (0.06, 0.46)                                    | 4                                                                        | 0.21 (0.06, 0.46)                                                                      |
| All Subjects | Day 28 Post Vac 2 | 19 | 89.3 (37.1, 214.9)    | 1.81 | 12                                       | 0.63 (0.38, 0.84)                                    | 12                                                                       | 0.63 (0.38, 0.84)                                                                      |
| SV-AS03      | Pre-Vaccination   | 10 | 5.5 (4.7, 6.6)        | 0.23 | 0                                        | 0.00 (0.00, 0.31)                                    | -                                                                        | -                                                                                      |
| SV-AS03      | Day 1 Post Vac 1  | 10 | 5.7 (4.5, 7.3)        | 0.34 | 0                                        | 0.00 (0.00, 0.31)                                    | 0                                                                        | 0.00 (0.00, 0.31)                                                                      |
| SV-AS03      | Day 3 Post Vac 1  | 10 | 5.4 (4.8, 5.9)        | 0.15 | 0                                        | 0.00 (0.00, 0.31)                                    | 0                                                                        | 0.00 (0.00, 0.31)                                                                      |
| SV-AS03      | Day 7 Post Vac 1  | 10 | 8.4 (6.4, 11.0)       | 0.37 | 0                                        | 0.00 (0.00, 0.31)                                    | 0                                                                        | 0.00 (0.00, 0.31)                                                                      |
| SV-AS03      | Day 28 Post Vac 1 | 9  | 27.2 (15.6, 47.5)     | 0.75 | 3                                        | 0.33 (0.07, 0.70)                                    | 3                                                                        | 0.33 (0.07, 0.70)                                                                      |
| SV-AS03      | Day 28 Post Vac 2 | 9  | 452.5 (197.0, 1039.7) | 1.02 | 9                                        | 1.00 (0.66, 1.00)                                    | 9                                                                        | 1.00 (0.66, 1.00)                                                                      |
| SV-PBS       | Pre-Vaccination   | 10 | 7.6 (5.1, 11.3)       | 0.56 | 0                                        | 0.00 (0.00, 0.31)                                    | -                                                                        | -                                                                                      |
| SV-PBS       | Day 1 Post Vac 1  | 10 | 6.8 (4.5, 10.3)       | 0.58 | 0                                        | 0.00 (0.00, 0.31)                                    | 0                                                                        | 0.00 (0.00, 0.31)                                                                      |
| SV-PBS       | Day 3 Post Vac 1  | 10 | 6.2 (4.7, 8.0)        | 0.37 | 0                                        | 0.00 (0.00, 0.31)                                    | 0                                                                        | 0.00 (0.00, 0.31)                                                                      |
| SV-PBS       | Day 7 Post Vac 1  | 10 | 7.8 (4.8, 12.9)       | 0.69 | 1                                        | 0.10 (0.00, 0.45)                                    | 1                                                                        | 0.10 (0.00, 0.45)                                                                      |
| SV-PBS       | Day 28 Post Vac 1 | 10 | 10.7 (6.8, 16.8)      | 0.63 | 1                                        | 0.10 (0.00, 0.45)                                    | 1                                                                        | 0.10 (0.00, 0.45)                                                                      |
| SV-PBS       | Day 28 Post Vac 2 | 10 | 20.7 (11.9, 36.0)     | 0.77 | 3                                        | 0.30 (0.07, 0.65)                                    | 3                                                                        | 0.30 (0.07, 0.65)                                                                      |

**Table A6:** Intend-to-treat population. Summary of neutralizing antibody titer/response against A/Indonesia/05/2005 by study arm and visit (Immunogenicity). SD: standard deviation on the log scale.

| Study Arm    | Study Visit       | N  | GMT (95% CI)          | SD   | Number of Responders (Titer $\geq$ 1:40) | Proportion of Responder (95% CI) (titer $\geq$ 1:40) | Number of Responders (Titer $\geq$ 1:40 and 4-fold change from baseline) | Proportion of Responders (95% CI) (Titer $\geq$ 1:40 and 4 fold change from baseline) |
|--------------|-------------------|----|-----------------------|------|------------------------------------------|------------------------------------------------------|--------------------------------------------------------------------------|---------------------------------------------------------------------------------------|
| All Subjects | Pre-Vaccination   | 20 | 6.5 (5.3, 8.0)        | 0.45 | 0                                        | 0.00 (0.00, 0.17)                                    | -                                                                        | -                                                                                     |
| All Subjects | Day 1 Post Vac 1  | 20 | 6.3 (5.0, 7.8)        | 0.47 | 0                                        | 0.00 (0.00, 0.17)                                    | 0                                                                        | 0.00 (0.00, 0.17)                                                                     |
| All Subjects | Day 3 Post Vac 1  | 20 | 5.7 (5.0, 6.6)        | 0.28 | 0                                        | 0.00 (0.00, 0.17)                                    | 0                                                                        | 0.00 (0.00, 0.17)                                                                     |
| All Subjects | Day 7 Post Vac 1  | 20 | 8.1 (6.3, 10.5)       | 0.54 | 1                                        | 0.05 (0.00, 0.25)                                    | 1                                                                        | 0.05 (0.00, 0.25)                                                                     |
| All Subjects | Day 28 Post Vac 1 | 19 | 16.7 (11.3, 24.6)     | 0.81 | 4                                        | 0.21 (0.06, 0.46)                                    | 4                                                                        | 0.21 (0.06, 0.46)                                                                     |
| All Subjects | Day 28 Post Vac 2 | 19 | 89.3 (37.1, 214.9)    | 1.82 | 12                                       | 0.63 (0.38, 0.84)                                    | 12                                                                       | 0.63 (0.38, 0.84)                                                                     |
| SV-AS03      | Pre-Vaccination   | 10 | 5.5 (4.7, 6.6)        | 0.23 | 0                                        | 0.00 (0.00, 0.31)                                    | -                                                                        | -                                                                                     |
| SV-AS03      | Day 1 Post Vac 1  | 10 | 5.7 (4.5, 7.3)        | 0.34 | 0                                        | 0.00 (0.00, 0.31)                                    | 0                                                                        | 0.00 (0.00, 0.31)                                                                     |
| SV-AS03      | Day 3 Post Vac 1  | 10 | 5.4 (4.8, 5.9)        | 0.15 | 0                                        | 0.00 (0.00, 0.31)                                    | 0                                                                        | 0.00 (0.00, 0.31)                                                                     |
| SV-AS03      | Day 7 Post Vac 1  | 10 | 8.4 (6.4, 11.0)       | 0.37 | 0                                        | 0.00 (0.00, 0.31)                                    | 0                                                                        | 0.00 (0.00, 0.31)                                                                     |
| SV-AS03      | Day 28 Post Vac 1 | 9  | 27.2 (15.6, 47.5)     | 0.72 | 3                                        | 0.33 (0.07, 0.70)                                    | 3                                                                        | 0.33 (0.07, 0.70)                                                                     |
| SV-AS03      | Day 28 Post Vac 2 | 9  | 452.5 (197.0, 1039.7) | 1.08 | 9                                        | 1.00 (0.66, 1.00)                                    | 9                                                                        | 1.00 (0.66, 1.00)                                                                     |
| SV-PBS       | Pre-Vaccination   | 10 | 7.6 (5.1, 11.3)       | 0.56 | 0                                        | 0.00 (0.00, 0.31)                                    | -                                                                        | -                                                                                     |
| SV-PBS       | Day 1 Post Vac 1  | 10 | 6.8 (4.5, 10.3)       | 0.58 | 0                                        | 0.00 (0.00, 0.31)                                    | 0                                                                        | 0.00 (0.00, 0.31)                                                                     |
| SV-PBS       | Day 3 Post Vac 1  | 10 | 6.2 (4.7, 8.0)        | 0.37 | 0                                        | 0.00 (0.00, 0.31)                                    | 0                                                                        | 0.00 (0.00, 0.31)                                                                     |
| SV-PBS       | Day 7 Post Vac 1  | 10 | 7.8 (4.8, 12.9)       | 0.69 | 1                                        | 0.10 (0.00, 0.45)                                    | 1                                                                        | 0.10 (0.00, 0.45)                                                                     |
| SV-PBS       | Day 28 Post Vac 1 | 10 | 10.7 (6.8, 16.8)      | 0.63 | 1                                        | 0.10 (0.00, 0.45)                                    | 1                                                                        | 0.10 (0.00, 0.45)                                                                     |
| SV-PBS       | Day 28 Post Vac 2 | 10 | 20.7 (11.9, 36.0)     | 0.77 | 3                                        | 0.30 (0.07, 0.65)                                    | 3                                                                        | 0.30 (0.07, 0.65)                                                                     |

**Table A7:** Per-protocol population. Summary of neutralizing antibody titer/response against A/Indonesia/05/2005 by study arm and visit (Immunogenicity). SD: standard deviation on the log scale.

| Cytokine/Chemokine                                | LOD         |
|---------------------------------------------------|-------------|
| Chemokine (C-C motif) ligand 5 (RANTES)           | 0.002 pg/mL |
| Monocyte chemoattractant protein-1 (MCP-1)        | 1.3 pg/mL   |
| Interferon gamma-induced protein 10 (IP-10)       | 0.5 pg/mL   |
| Interleukin 8 (IL-8)                              | 69.9 fg/mL  |
| Eotaxin-1                                         | 0.8 pg/mL   |
| Interleukin-1 alpha (IL-1 $\alpha$ )              | 1.0 pg/mL   |
| Interleukin 12 p70 (IL-12p70)                     | 12.6 fg/mL  |
| Interleukin-10 (IL-10)                            | 13.7 fg/mL  |
| Tumor necrosis factors (TNF)                      | 67.3 fg/mL  |
| Lymphotoxin-alpha (LT- $\alpha$ )                 | 0.2 pg/mL   |
| Macrophage Inflammatory Protein (MIP-1 $\alpha$ ) | 0.2 pg/mL   |
| Interleukin 6 (IL-6)                              | 68.4 fg/mL  |
| Interleukin-1 beta (IL-1 $\beta$ )                | 48.4 fg/mL  |
| Interferon gamma (IFN $\gamma$ )                  | 14.84 fg/mL |

**Table A8:** Cytokine and chemokine limits of detection.

| Category/Chromosome | #Genes |
|---------------------|--------|
| Mt_rRNA             | 2      |
| Mt_tRNA             | 22     |
| Mt_tRNA_pseudogene  | 580    |
| rRNA                | 530    |
| rRNA_pseudogene     | 179    |
| tRNA_pseudogene     | 128    |
| X                   | 2326   |
| Y                   | 509    |
| Total               | 4185   |

**Table A9:** Number of excluded genes by category/chromosome (RNA-Seq).

|                 | Day 1 | Day 3 | Day 7 | Day 28 | Day 1-28 |
|-----------------|-------|-------|-------|--------|----------|
| All Cells       | 13425 | 13406 | 13427 | 13437  | 13589    |
| B-cells         | 14111 | 14145 | 14149 | 14081  | 14427    |
| Dendritic cells | 13057 | 13060 | 13054 | 13016  | 13279    |
| Monocytes       | 12863 | 12878 | 12858 | 12889  | 13101    |
| Neutrophils     | 10745 | 10765 | 10780 | 10655  | 11014    |
| NK-cells        | 14048 | 14042 | 14040 | 14148  | 14349    |
| T-cells         | 14236 | 14223 | 14283 | 14295  | 14511    |

**Table A10:** Number of genes that passed the low expression cut off (RNA-Seq).

|                                                | Min   | Q1    | Median | Mean  | Q3    | Max    | SD    | MAD  |
|------------------------------------------------|-------|-------|--------|-------|-------|--------|-------|------|
| Total Mapped Reads [ $10^6$ ]                  | 11.11 | 49.61 | 53.71  | 56.20 | 59.91 | 199.50 | 12.83 | 7.41 |
| Uniquely Mapped Reads [ $10^6$ ]               | 9.43  | 41.08 | 44.96  | 46.89 | 50.03 | 162.81 | 10.77 | 6.42 |
| Uniquely Mapped Reads [%]                      | 72.70 | 81.70 | 84.00  | 83.41 | 85.00 | 87.90  | 2.29  | 2.67 |
| Paired Reads (Mapped to Different Chromosomes) | 0.00  | 0.00  | 0.00   | 0.00  | 0.00  | 4.00   | 0.14  | 0.00 |
| Counted Fragments [ $10^6$ ]                   | 0.01  | 13.82 | 16.18  | 16.65 | 18.62 | 59.93  | 4.37  | 3.56 |
| Median GC [%]                                  | 48.00 | 50.00 | 50.00  | 50.74 | 52.00 | 54.00  | 1.15  | 0.00 |
| Mean GC [%]                                    | 47.26 | 49.70 | 50.36  | 50.32 | 50.92 | 53.23  | 0.83  | 0.90 |
| FACS Cells [ $10^6$ ]                          | 0.04  | 1.50  | 2.51   | 2.22  | 3.00  | 4.50   | 1.16  | 1.50 |
| Illumina Flow Cells                            | 1.00  | 2.00  | 3.00   | 2.80  | 4.00  | 7.00   | 1.16  | 1.48 |
| Illumina Flow Lanes                            | 1.00  | 10.00 | 11.00  | 10.48 | 12.00 | 15.00  | 2.65  | 1.48 |

**Table A11:** Summary statistics (RNA-Seq, technical variables)

|                                        | Min   | Q1     | Median | Mean   | Q3     | Max     | SD     | MAD   |
|----------------------------------------|-------|--------|--------|--------|--------|---------|--------|-------|
| Exon Tags [%]                          | 67.83 | 79.42  | 81.64  | 81.58  | 83.72  | 88.57   | 3.17   | 3.17  |
| Intron Tags [%]                        | 10.03 | 14.55  | 16.46  | 16.59  | 18.48  | 29.75   | 2.91   | 2.94  |
| Intergenic Tags [%]                    | 1.15  | 1.51   | 1.87   | 1.83   | 2.08   | 2.95    | 0.34   | 0.39  |
| CDS Exons Tags Per Kb                  | 86.93 | 422.41 | 467.15 | 485.07 | 526.06 | 1721.93 | 115.41 | 78.25 |
| Intron Tags Per Kb                     | 1.55  | 5.48   | 6.40   | 6.63   | 7.50   | 23.68   | 1.91   | 1.50  |
| 3' UTR Tags Per Kb                     | 60.90 | 269.29 | 301.80 | 317.47 | 343.84 | 1006.24 | 78.36  | 53.95 |
| 5' UTR Tags Per Kb                     | 19.68 | 135.64 | 156.71 | 160.88 | 178.56 | 506.64  | 39.89  | 31.59 |
| TSS upstream 10Kb Tags Per Kb          | 0.38  | 0.84   | 1.03   | 1.06   | 1.22   | 3.84    | 0.32   | 0.28  |
| TES downstream 10Kb Tags Per Kb        | 0.73  | 2.70   | 3.23   | 3.34   | 3.80   | 13.60   | 0.99   | 0.82  |
| Splicing Events [ $10^5$ ]             | 8.93  | 52.42  | 58.58  | 61.09  | 67.35  | 215.54  | 15.24  | 10.87 |
| Known Splicing Events [%]              | 98.14 | 98.51  | 98.89  | 98.82  | 99.08  | 99.96   | 0.31   | 0.38  |
| Partially Known Splicing Events [%]    | 0.00  | 0.62   | 0.73   | 0.74   | 0.81   | 1.27    | 0.16   | 0.14  |
| Novel Splicing Events [%]              | 0.00  | 0.27   | 0.33   | 0.41   | 0.52   | 1.21    | 0.18   | 0.12  |
| Splicing Junctions [ $10^5$ ]          | 0.58  | 1.48   | 1.55   | 1.51   | 1.61   | 2.11    | 0.16   | 0.09  |
| Known Splicing Junctions [%]           | 83.62 | 90.17  | 91.04  | 90.90  | 91.89  | 100.00  | 1.65   | 1.28  |
| Partially Known Splicing Junctions [%] | 0.00  | 5.92   | 6.51   | 6.59   | 7.15   | 12.05   | 1.19   | 0.91  |
| Novel Splicing Junctions [%]           | 0.00  | 2.14   | 2.47   | 2.51   | 2.80   | 4.33    | 0.52   | 0.49  |

**Table A12:** Summary statistics (RNA-Seq, gene model variables)

|                                  | 1st PC (56.8%)<br>Before TMM<br>Normalization. | 2nd PC (19.7%)<br>Before TMM<br>Normalization. | 1st PC (52.2%)<br>After TMM<br>Normalization. | 2nd PC (21.6%)<br>After TMM<br>Normalization. |
|----------------------------------|------------------------------------------------|------------------------------------------------|-----------------------------------------------|-----------------------------------------------|
| Total Mapped Reads [ $10^6$ ]    | -0.09                                          | -0.06                                          | -0.11                                         | -0.02                                         |
| Uniquely Mapped Reads [ $10^6$ ] | 0.04                                           | -0.04                                          | 0.02                                          | -0.00                                         |
| Uniquely Mapped Reads [%]        | 0.73                                           | 0.02                                           | 0.74                                          | -0.02                                         |
| Median GC [%]                    | 0.42                                           | 0.04                                           | 0.38                                          | 0.06                                          |
| Mean GC [%]                      | 0.39                                           | 0.07                                           | 0.32                                          | 0.10                                          |
| FACS Cells [ $10^6$ ]            | 0.29                                           | -0.39                                          | 0.29                                          | -0.42                                         |
| Illumina Flow Cells              | -0.07                                          | 0.08                                           | -0.01                                         | 0.03                                          |
| Illumina Flow Lanes              | -0.02                                          | 0.07                                           | 0.01                                          | 0.05                                          |

**Table A13:** Spearman correlation with technical variables (RNA-Seq, original variables).

|                                  | 1st PC (50.9%)<br>Before TMM<br>Normalization. | 2nd PC (15.7%)<br>Before TMM<br>Normalization. | 1st PC (45.1%)<br>After TMM<br>Normalization. | 2nd PC (17.2%)<br>After TMM<br>Normalization. |
|----------------------------------|------------------------------------------------|------------------------------------------------|-----------------------------------------------|-----------------------------------------------|
| Total Mapped Reads [ $10^6$ ]    | -0.08                                          | -0.08                                          | -0.10                                         | -0.01                                         |
| Uniquely Mapped Reads [ $10^6$ ] | 0.05                                           | -0.01                                          | 0.03                                          | 0.08                                          |
| Uniquely Mapped Reads [%]        | 0.73                                           | 0.31                                           | 0.76                                          | 0.47                                          |
| Median GC [%]                    | 0.45                                           | 0.27                                           | 0.38                                          | 0.34                                          |
| Mean GC [%]                      | 0.44                                           | 0.30                                           | 0.33                                          | 0.36                                          |
| FACS Cells [ $10^6$ ]            | 0.28                                           | -0.30                                          | 0.29                                          | -0.18                                         |
| Illumina Flow Cells              | -0.11                                          | 0.00                                           | -0.03                                         | -0.03                                         |
| Illumina Flow Lanes              | -0.03                                          | 0.05                                           | 0.00                                          | 0.03                                          |

**Table A14:** Spearman correlation with technical variables (RNA-Seq, standardized variables).

|                                     | 1st PC (56.8%)<br>Before TMM<br>Normalization. | 2nd PC (19.7%)<br>Before TMM<br>Normalization. | 1st PC (52.2%)<br>After TMM<br>Normalization. | 2nd PC (21.6%)<br>After TMM<br>Normalization. |
|-------------------------------------|------------------------------------------------|------------------------------------------------|-----------------------------------------------|-----------------------------------------------|
| Exon Tags [%]                       | 0.14                                           | 0.57                                           | 0.07                                          | 0.63                                          |
| Intron Tags [%]                     | -0.09                                          | -0.55                                          | -0.02                                         | -0.61                                         |
| Intergenic Tags [%]                 | -0.57                                          | -0.58                                          | -0.53                                         | -0.60                                         |
| CDS Exons Tags Per Kb               | -0.07                                          | 0.18                                           | -0.11                                         | 0.24                                          |
| Intron Tags Per Kb                  | -0.09                                          | -0.42                                          | -0.06                                         | -0.44                                         |
| 3' UTR Tags Per Kb                  | 0.40                                           | -0.10                                          | 0.39                                          | -0.10                                         |
| 5' UTR Tags Per Kb                  | 0.13                                           | 0.06                                           | 0.09                                          | 0.11                                          |
| TSS upstream 10Kb Tags Per Kb       | -0.35                                          | -0.59                                          | -0.35                                         | -0.58                                         |
| TES downstream 10Kb Tags Per Kb     | -0.49                                          | -0.47                                          | -0.47                                         | -0.46                                         |
| Splicing Events [ $10^5$ ]          | -0.01                                          | 0.23                                           | -0.05                                         | 0.29                                          |
| Known Splicing Events [%]           | 0.08                                           | 0.73                                           | 0.07                                          | 0.75                                          |
| Partially Known Splicing Events [%] | 0.03                                           | -0.77                                          | 0.03                                          | -0.79                                         |
| Novel Splicing Events [%]           | -0.19                                          | -0.66                                          | -0.19                                         | -0.67                                         |
| Splicing Junctions [ $10^5$ ]       | -0.71                                          | 0.08                                           | -0.72                                         | 0.14                                          |
| Known Splicing Junctions [%]        | -0.14                                          | 0.60                                           | -0.11                                         | 0.59                                          |



|                                        | 1st PC (56.8%)<br>Before TMM<br>Normalization. | 2nd PC (19.7%)<br>Before TMM<br>Normalization. | 1st PC (52.2%)<br>After TMM<br>Normalization. | 2nd PC (21.6%)<br>After TMM<br>Normalization. |
|----------------------------------------|------------------------------------------------|------------------------------------------------|-----------------------------------------------|-----------------------------------------------|
| Partially Known Splicing Junctions [%] | 0.22                                           | -0.48                                          | 0.19                                          | -0.46                                         |
| Novel Splicing Junctions [%]           | -0.04                                          | -0.78                                          | -0.05                                         | -0.78                                         |

**Table A15:** Spearman correlation with gene model variables (RNA-Seq, original variables).

|                                        | 1st PC (50.9%)<br>Before TMM<br>Normalization. | 2nd PC (15.7%)<br>Before TMM<br>Normalization. | 1st PC (45.1%)<br>After TMM<br>Normalization. | 2nd PC (17.2%)<br>After TMM<br>Normalization. |
|----------------------------------------|------------------------------------------------|------------------------------------------------|-----------------------------------------------|-----------------------------------------------|
| Exon Tags [%]                          | 0.18                                           | 0.66                                           | 0.06                                          | 0.64                                          |
| Intron Tags [%]                        | -0.14                                          | -0.63                                          | -0.01                                         | -0.59                                         |
| Intergenic Tags [%]                    | -0.60                                          | -0.80                                          | -0.53                                         | -0.87                                         |
| CDS Exons Tags Per Kb                  | -0.04                                          | 0.17                                           | -0.11                                         | 0.21                                          |
| Intron Tags Per Kb                     | -0.11                                          | -0.47                                          | -0.04                                         | -0.39                                         |
| 3' UTR Tags Per Kb                     | 0.41                                           | 0.08                                           | 0.40                                          | 0.24                                          |
| 5' UTR Tags Per Kb                     | 0.15                                           | 0.15                                           | 0.10                                          | 0.25                                          |
| TSS upstream 10Kb Tags Per Kb          | -0.36                                          | -0.70                                          | -0.35                                         | -0.67                                         |
| TES downstream 10Kb Tags Per Kb        | -0.50                                          | -0.62                                          | -0.47                                         | -0.61                                         |
| Splicing Events [ $10^5$ ]             | 0.02                                           | 0.25                                           | -0.05                                         | 0.31                                          |
| Known Splicing Events [%]              | 0.08                                           | 0.69                                           | 0.07                                          | 0.66                                          |
| Partially Known Splicing Events [%]    | 0.03                                           | -0.67                                          | 0.04                                          | -0.57                                         |
| Novel Splicing Events [%]              | -0.19                                          | -0.67                                          | -0.20                                         | -0.68                                         |
| Splicing Junctions [ $10^5$ ]          | -0.71                                          | -0.13                                          | -0.72                                         | -0.23                                         |
| Known Splicing Junctions [%]           | -0.15                                          | 0.44                                           | -0.11                                         | 0.29                                          |
| Partially Known Splicing Junctions [%] | 0.23                                           | -0.30                                          | 0.19                                          | -0.14                                         |
| Novel Splicing Junctions [%]           | -0.02                                          | -0.67                                          | -0.05                                         | -0.56                                         |

**Table A16:** Spearman correlation with gene model variables (RNA-Seq, standardized variables).

|           | Df  | Sum Sq     | Mean Sq    | F value | Pr(>F)  |
|-----------|-----|------------|------------|---------|---------|
| Celltype  | 5   | 5041589.01 | 1008317.80 | 8652.07 | <0.0001 |
| Subject   | 19  | 4140.38    | 217.91     | 1.87    | 0.0135  |
| Day       | 6   | 1187.07    | 197.84     | 1.7     | 0.1186  |
| Residuals | 808 | 94164.89   | 116.54     |         |         |

**Table A17:** Sources of variation (RNA-Seq, n=839). ANOVA results for PC1 (total explained variance=45.1%).

|           | Df  | Sum Sq     | Mean Sq   | F value | Pr(>F)  |
|-----------|-----|------------|-----------|---------|---------|
| Celltype  | 5   | 1816118.96 | 363223.79 | 2358.42 | <0.0001 |
| Subject   | 19  | 15062.05   | 792.74    | 5.15    | <0.0001 |
| Day       | 6   | 748.45     | 124.74    | 0.81    | 0.5623  |
| Residuals | 808 | 124441.53  | 154.01    |         |         |

**Table A18:** Sources of variation (RNA-Seq, n=839). ANOVA results for PC2 (total explained variance=17.2%).

| Subject ID | Celltype        | Study Visit Day | Experimental Comment                                                                                                |
|------------|-----------------|-----------------|---------------------------------------------------------------------------------------------------------------------|
| P          | B-cells         | Day 1           |                                                                                                                     |
| H          | B-cells         | Day 3           |                                                                                                                     |
| B          | B-cells         | Day 28          | Unscheduled visit, no FACS time available for activation stain. Performed phenotypic analysis at time of cell sort. |
| D          | B-cells         | Day 28          |                                                                                                                     |
| H          | Dendritic cells | Day -28         | very low PBMC count after initial fractionation of the whole blood                                                  |
| J          | Dendritic cells | Day 28          | problem w/ FACS machine on DC Sort, so low recovery                                                                 |
| H          | Monocytes       | Day -28         | very low PBMC count after initial fractionation of the whole blood                                                  |
| H          | Neutrophils     | Day -28         | very low PBMC count after initial fractionation of the whole blood                                                  |
| D          | Neutrophils     | Day 28          |                                                                                                                     |
| H          | NK-cells        | Day -28         | very low PBMC count after initial fractionation of the whole blood                                                  |
| P          | NK-cells        | Day 0           |                                                                                                                     |
| J          | T-cells         | Day 0           |                                                                                                                     |
| C          | T-cells         | Day 0           |                                                                                                                     |
| P          | T-cells         | Day 1           |                                                                                                                     |

**Table A19:** Outlying observations (RNA-Seq).

| Celltype        | Pearson Correlation |
|-----------------|---------------------|
| B-cells         | 0.932               |
| Dendritic cells | 0.968               |
| Monocytes       | 0.966               |
| Neutrophils     | 0.882               |
| NK-cells        | 0.911               |
| T-cells         | 0.874               |

**Table A20:** Correlation between TMM normalization factors (RNA-Seq, all versus per-cell).

|                                  | 1st PC (18.2%)<br>Before TMM<br>Normalization. | 2nd PC (8.7%)<br>Before TMM<br>Normalization. | 1st PC (17.2%)<br>After TMM<br>Normalization. | 2nd PC (8.9%)<br>After TMM<br>Normalization. |
|----------------------------------|------------------------------------------------|-----------------------------------------------|-----------------------------------------------|----------------------------------------------|
| Total Mapped Reads [ $10^6$ ]    | -0.16                                          | 0.30                                          | -0.14                                         | -0.29                                        |
| Uniquely Mapped Reads [ $10^6$ ] | -0.17                                          | 0.33                                          | -0.15                                         | -0.31                                        |
| Uniquely Mapped Reads [%]        | -0.12                                          | 0.38                                          | -0.11                                         | -0.39                                        |
| Median GC [%]                    | -0.65                                          | 0.25                                          | -0.65                                         | -0.25                                        |
| Mean GC [%]                      | -0.93                                          | 0.10                                          | -0.93                                         | -0.10                                        |
| FACS Cells [ $10^6$ ]            | 0.18                                           | 0.05                                          | 0.17                                          | -0.05                                        |
| Illumina Flow Cells              | 0.55                                           | -0.09                                         | 0.52                                          | 0.09                                         |
| Illumina Flow Lanes              | 0.25                                           | 0.08                                          | 0.24                                          | -0.08                                        |

**Table A21:** Spearman correlation with technical variables (RNA-Seq, B-cells, standardized variables, outliers excluded).

|                                  | 1st PC (16.8%)<br>Before TMM<br>Normalization. | 2nd PC (12.7%)<br>Before TMM<br>Normalization. | 1st PC (15.3%)<br>After TMM<br>Normalization. | 2nd PC (12.8%)<br>After TMM<br>Normalization. |
|----------------------------------|------------------------------------------------|------------------------------------------------|-----------------------------------------------|-----------------------------------------------|
| Total Mapped Reads [ $10^6$ ]    | -0.13                                          | -0.12                                          | -0.11                                         | 0.14                                          |
| Uniquely Mapped Reads [ $10^6$ ] | -0.15                                          | -0.11                                          | -0.13                                         | 0.13                                          |
| Uniquely Mapped Reads [%]        | -0.46                                          | 0.14                                           | -0.48                                         | -0.09                                         |
| Median GC [%]                    | -0.75                                          | -0.39                                          | -0.71                                         | 0.47                                          |
| Mean GC [%]                      | -0.81                                          | -0.41                                          | -0.77                                         | 0.50                                          |
| FACS Cells [ $10^6$ ]            | -0.21                                          | 0.07                                           | -0.22                                         | -0.06                                         |
| Illumina Flow Cells              | 0.39                                           | 0.37                                           | 0.34                                          | -0.41                                         |
| Illumina Flow Lanes              | 0.19                                           | 0.14                                           | 0.18                                          | -0.17                                         |

**Table A22:** Spearman correlation with technical variables (RNA-Seq, Dendritic cells, standardized variables, outliers excluded).

|                                  | 1st PC (16%)<br>Before TMM<br>Normalization. | 2nd PC (10.2%)<br>Before TMM<br>Normalization. | 1st PC (14.7%)<br>After TMM<br>Normalization. | 2nd PC (10.7%)<br>After TMM<br>Normalization. |
|----------------------------------|----------------------------------------------|------------------------------------------------|-----------------------------------------------|-----------------------------------------------|
| Total Mapped Reads [ $10^6$ ]    | -0.12                                        | 0.28                                           | -0.08                                         | -0.26                                         |
| Uniquely Mapped Reads [ $10^6$ ] | -0.13                                        | 0.29                                           | -0.09                                         | -0.27                                         |
| Uniquely Mapped Reads [%]        | -0.36                                        | 0.30                                           | -0.27                                         | -0.35                                         |
| Median GC [%]                    | -0.74                                        | 0.25                                           | -0.72                                         | -0.39                                         |
| Mean GC [%]                      | -0.84                                        | 0.34                                           | -0.82                                         | -0.50                                         |
| FACS Cells [ $10^6$ ]            | -0.13                                        | 0.04                                           | -0.10                                         | -0.08                                         |
| Illumina Flow Cells              | 0.53                                         | -0.27                                          | 0.45                                          | 0.36                                          |
| Illumina Flow Lanes              | 0.17                                         | 0.01                                           | 0.15                                          | 0.04                                          |

**Table A23:** Spearman correlation with technical variables (RNA-Seq, Monocytes, standardized variables, outliers excluded).

|                                  | 1st PC (18.6%)<br>Before TMM<br>Normalization. | 2nd PC (8.8%)<br>Before TMM<br>Normalization. | 1st PC (11.3%)<br>After TMM<br>Normalization. | 2nd PC (9.5%)<br>After TMM<br>Normalization. |
|----------------------------------|------------------------------------------------|-----------------------------------------------|-----------------------------------------------|----------------------------------------------|
| Total Mapped Reads [ $10^6$ ]    | -0.24                                          | 0.02                                          | 0.26                                          | -0.01                                        |
| Uniquely Mapped Reads [ $10^6$ ] | -0.24                                          | 0.00                                          | 0.26                                          | 0.01                                         |
| Uniquely Mapped Reads [%]        | -0.12                                          | -0.37                                         | 0.14                                          | 0.35                                         |
| Median GC [%]                    | -0.36                                          | -0.67                                         | 0.33                                          | 0.68                                         |
| Mean GC [%]                      | -0.40                                          | -0.80                                         | 0.35                                          | 0.78                                         |
| FACS Cells [ $10^6$ ]            | 0.00                                           | -0.02                                         | 0.01                                          | 0.03                                         |
| Illumina Flow Cells              | 0.45                                           | 0.33                                          | -0.39                                         | -0.25                                        |
| Illumina Flow Lanes              | 0.02                                           | 0.21                                          | 0.07                                          | -0.13                                        |

**Table A24:** Spearman correlation with technical variables (RNA-Seq, Neutrophils, standardized variables, outliers excluded).

|                                  | 1st PC (17.3%)<br>Before TMM<br>Normalization. | 2nd PC (9.9%)<br>Before TMM<br>Normalization. | 1st PC (16.1%)<br>After TMM<br>Normalization. | 2nd PC (10.8%)<br>After TMM<br>Normalization. |
|----------------------------------|------------------------------------------------|-----------------------------------------------|-----------------------------------------------|-----------------------------------------------|
| Total Mapped Reads [ $10^6$ ]    | 0.14                                           | -0.02                                         | 0.15                                          | -0.07                                         |
| Uniquely Mapped Reads [ $10^6$ ] | 0.16                                           | -0.01                                         | 0.16                                          | -0.05                                         |
| Uniquely Mapped Reads [%]        | 0.31                                           | 0.39                                          | 0.28                                          | 0.40                                          |
| Median GC [%]                    | 0.85                                           | -0.09                                         | 0.84                                          | 0.02                                          |
| Mean GC [%]                      | 0.96                                           | -0.06                                         | 0.95                                          | 0.05                                          |
| FACS Cells [ $10^6$ ]            | 0.14                                           | -0.14                                         | 0.16                                          | -0.16                                         |
| Illumina Flow Cells              | -0.44                                          | -0.19                                         | -0.41                                         | -0.20                                         |
| Illumina Flow Lanes              | -0.13                                          | -0.27                                         | -0.11                                         | -0.27                                         |

**Table A25:** Spearman correlation with technical variables (RNA-Seq, NK-cells, standardized variables, outliers excluded).

|                                  | 1st PC (17.1%)<br>Before TMM<br>Normalization. | 2nd PC (11.9%)<br>Before TMM<br>Normalization. | 1st PC (16.4%)<br>After TMM<br>Normalization. | 2nd PC (12.1%)<br>After TMM<br>Normalization. |
|----------------------------------|------------------------------------------------|------------------------------------------------|-----------------------------------------------|-----------------------------------------------|
| Total Mapped Reads [ $10^6$ ]    | -0.01                                          | -0.25                                          | -0.02                                         | -0.24                                         |
| Uniquely Mapped Reads [ $10^6$ ] | 0.03                                           | -0.25                                          | 0.01                                          | -0.25                                         |
| Uniquely Mapped Reads [%]        | 0.22                                           | -0.32                                          | 0.19                                          | -0.33                                         |
| Median GC [%]                    | 0.69                                           | -0.20                                          | 0.68                                          | -0.24                                         |
| Mean GC [%]                      | 0.95                                           | -0.00                                          | 0.94                                          | -0.06                                         |
| FACS Cells [ $10^6$ ]            | -0.25                                          | -0.23                                          | -0.25                                         | -0.22                                         |
| Illumina Flow Cells              | -0.44                                          | 0.28                                           | -0.41                                         | 0.30                                          |
| Illumina Flow Lanes              | -0.29                                          | 0.07                                           | -0.28                                         | 0.07                                          |

**Table A26:** Spearman correlation with technical variables (RNA-Seq, T-cells, standardized variables, outliers excluded).

|                                        | 1st PC (18.2%)<br>Before TMM<br>Normalization. | 2nd PC (8.7%)<br>Before TMM<br>Normalization. | 1st PC (17.2%)<br>After TMM<br>Normalization. | 2nd PC (8.9%)<br>After TMM<br>Normalization. |
|----------------------------------------|------------------------------------------------|-----------------------------------------------|-----------------------------------------------|----------------------------------------------|
| Exon Tags [%]                          | -0.69                                          | -0.47                                         | -0.69                                         | 0.48                                         |
| Intron Tags [%]                        | 0.68                                           | 0.48                                          | 0.68                                          | -0.49                                        |
| Intergenic Tags [%]                    | 0.76                                           | 0.33                                          | 0.75                                          | -0.34                                        |
| CDS Exons Tags Per Kb                  | -0.34                                          | 0.23                                          | -0.32                                         | -0.22                                        |
| Intron Tags Per Kb                     | 0.24                                           | 0.44                                          | 0.24                                          | -0.43                                        |
| 3' UTR Tags Per Kb                     | -0.04                                          | 0.27                                          | -0.02                                         | -0.25                                        |
| 5' UTR Tags Per Kb                     | -0.37                                          | 0.35                                          | -0.35                                         | -0.34                                        |
| TSS upstream 10Kb Tags Per Kb          | 0.08                                           | 0.39                                          | 0.08                                          | -0.38                                        |
| TES downstream 10Kb Tags Per Kb        | 0.28                                           | 0.34                                          | 0.28                                          | -0.34                                        |
| Splicing Events [ $10^5$ ]             | -0.37                                          | 0.21                                          | -0.35                                         | -0.20                                        |
| Known Splicing Events [%]              | 0.09                                           | -0.67                                         | 0.07                                          | 0.68                                         |
| Partially Known Splicing Events [%]    | 0.05                                           | 0.72                                          | 0.07                                          | -0.72                                        |
| Novel Splicing Events [%]              | -0.17                                          | 0.41                                          | -0.16                                         | -0.41                                        |
| Splicing Junctions [ $10^5$ ]          | -0.17                                          | 0.18                                          | -0.16                                         | -0.16                                        |
| Known Splicing Junctions [%]           | 0.27                                           | -0.29                                         | 0.25                                          | 0.28                                         |
| Partially Known Splicing Junctions [%] | -0.31                                          | 0.31                                          | -0.29                                         | -0.29                                        |
| Novel Splicing Junctions [%]           | -0.14                                          | 0.25                                          | -0.14                                         | -0.23                                        |

**Table A27:** Spearman correlation with gene model variables (RNA-Seq, B-cells, standardized variables, outliers excluded).

|                                        | 1st PC (16.8%)<br>Before TMM<br>Normalization. | 2nd PC (12.7%)<br>Before TMM<br>Normalization. | 1st PC (15.3%)<br>After TMM<br>Normalization. | 2nd PC (12.8%)<br>After TMM<br>Normalization. |
|----------------------------------------|------------------------------------------------|------------------------------------------------|-----------------------------------------------|-----------------------------------------------|
| Exon Tags [%]                          | -0.36                                          | -0.48                                          | -0.30                                         | 0.50                                          |
| Intron Tags [%]                        | 0.35                                           | 0.48                                           | 0.29                                          | -0.50                                         |
| Intergenic Tags [%]                    | 0.50                                           | 0.43                                           | 0.45                                          | -0.47                                         |
| CDS Exons Tags Per Kb                  | -0.22                                          | -0.21                                          | -0.19                                         | 0.24                                          |
| Intron Tags Per Kb                     | 0.12                                           | 0.22                                           | 0.09                                          | -0.22                                         |
| 3' UTR Tags Per Kb                     | -0.02                                          | -0.04                                          | -0.01                                         | 0.04                                          |
| 5' UTR Tags Per Kb                     | -0.37                                          | -0.17                                          | -0.35                                         | 0.21                                          |
| TSS upstream 10Kb Tags Per Kb          | -0.01                                          | 0.03                                           | -0.00                                         | -0.02                                         |
| TES downstream 10Kb Tags Per Kb        | 0.17                                           | 0.13                                           | 0.17                                          | -0.14                                         |
| Splicing Events [ $10^5$ ]             | -0.22                                          | -0.21                                          | -0.19                                         | 0.23                                          |
| Known Splicing Events [%]              | 0.47                                           | -0.28                                          | 0.51                                          | 0.22                                          |
| Partially Known Splicing Events [%]    | -0.53                                          | 0.33                                           | -0.58                                         | -0.26                                         |
| Novel Splicing Events [%]              | -0.13                                          | 0.02                                           | -0.12                                         | -0.01                                         |
| Splicing Junctions [ $10^5$ ]          | -0.11                                          | -0.24                                          | -0.09                                         | 0.26                                          |
| Known Splicing Junctions [%]           | 0.41                                           | 0.02                                           | 0.42                                          | -0.07                                         |
| Partially Known Splicing Junctions [%] | -0.44                                          | 0.01                                           | -0.45                                         | 0.05                                          |
| Novel Splicing Junctions [%]           | -0.30                                          | -0.00                                          | -0.28                                         | 0.04                                          |

**Table A28:** Spearman correlation with gene model variables (RNA-Seq, Dendritic cells, standardized variables, outliers excluded).

|                                        | 1st PC (16%)<br>Before TMM<br>Normalization. | 2nd PC (10.2%)<br>Before TMM<br>Normalization. | 1st PC (14.7%)<br>After TMM<br>Normalization. | 2nd PC (10.7%)<br>After TMM<br>Normalization. |
|----------------------------------------|----------------------------------------------|------------------------------------------------|-----------------------------------------------|-----------------------------------------------|
| Exon Tags [%]                          | -0.72                                        | -0.49                                          | -0.82                                         | 0.34                                          |
| Intron Tags [%]                        | 0.72                                         | 0.50                                           | 0.82                                          | -0.34                                         |
| Intergenic Tags [%]                    | 0.75                                         | 0.35                                           | 0.82                                          | -0.20                                         |
| CDS Exons Tags Per Kb                  | -0.32                                        | 0.18                                           | -0.30                                         | -0.19                                         |
| Intron Tags Per Kb                     | 0.34                                         | 0.50                                           | 0.44                                          | -0.39                                         |
| 3' UTR Tags Per Kb                     | -0.06                                        | 0.13                                           | -0.03                                         | -0.09                                         |
| 5' UTR Tags Per Kb                     | -0.35                                        | 0.38                                           | -0.31                                         | -0.41                                         |
| TSS upstream 10Kb Tags Per Kb          | 0.15                                         | 0.52                                           | 0.23                                          | -0.44                                         |
| TES downstream 10Kb Tags Per Kb        | 0.30                                         | 0.37                                           | 0.36                                          | -0.27                                         |
| Splicing Events [ $10^5$ ]             | -0.31                                        | 0.12                                           | -0.31                                         | -0.14                                         |
| Known Splicing Events [%]              | -0.21                                        | -0.80                                          | -0.32                                         | 0.71                                          |
| Partially Known Splicing Events [%]    | 0.10                                         | 0.81                                           | 0.21                                          | -0.74                                         |
| Novel Splicing Events [%]              | 0.18                                         | 0.53                                           | 0.24                                          | -0.46                                         |
| Splicing Junctions [ $10^5$ ]          | -0.09                                        | 0.27                                           | -0.08                                         | -0.24                                         |
| Known Splicing Junctions [%]           | 0.15                                         | -0.40                                          | 0.11                                          | 0.39                                          |
| Partially Known Splicing Junctions [%] | -0.17                                        | 0.47                                           | -0.11                                         | -0.47                                         |
| Novel Splicing Junctions [%]           | -0.07                                        | 0.28                                           | -0.04                                         | -0.25                                         |

**Table A29:** Spearman correlation with gene model variables (RNA-Seq, Monocytes, standardized variables, outliers excluded).

|                                        | 1st PC (18.6%)<br>Before TMM<br>Normalization. | 2nd PC (8.8%)<br>Before TMM<br>Normalization. | 1st PC (11.3%)<br>After TMM<br>Normalization. | 2nd PC (9.5%)<br>After TMM<br>Normalization. |
|----------------------------------------|------------------------------------------------|-----------------------------------------------|-----------------------------------------------|----------------------------------------------|
| Exon Tags [%]                          | -0.55                                          | -0.37                                         | 0.66                                          | 0.50                                         |
| Intron Tags [%]                        | 0.55                                           | 0.36                                          | -0.67                                         | -0.50                                        |
| Intergenic Tags [%]                    | 0.45                                           | 0.44                                          | -0.55                                         | -0.57                                        |
| CDS Exons Tags Per Kb                  | -0.34                                          | -0.10                                         | 0.38                                          | 0.14                                         |
| Intron Tags Per Kb                     | 0.14                                           | 0.25                                          | -0.20                                         | -0.32                                        |
| 3' UTR Tags Per Kb                     | -0.25                                          | 0.11                                          | 0.29                                          | -0.07                                        |
| 5' UTR Tags Per Kb                     | -0.35                                          | -0.21                                         | 0.35                                          | 0.23                                         |
| TSS upstream 10Kb Tags Per Kb          | -0.02                                          | 0.19                                          | -0.03                                         | -0.24                                        |
| TES downstream 10Kb Tags Per Kb        | -0.02                                          | 0.26                                          | 0.01                                          | -0.29                                        |
| Splicing Events [ $10^5$ ]             | -0.34                                          | -0.10                                         | 0.40                                          | 0.16                                         |
| Known Splicing Events [%]              | -0.40                                          | 0.02                                          | 0.52                                          | 0.09                                         |
| Partially Known Splicing Events [%]    | 0.35                                           | -0.02                                         | -0.48                                         | -0.11                                        |
| Novel Splicing Events [%]              | 0.27                                           | -0.03                                         | -0.34                                         | -0.02                                        |
| Splicing Junctions [ $10^5$ ]          | 0.03                                           | -0.10                                         | 0.01                                          | 0.13                                         |
| Known Splicing Junctions [%]           | 0.23                                           | 0.15                                          | -0.21                                         | -0.11                                        |
| Partially Known Splicing Junctions [%] | -0.15                                          | -0.20                                         | 0.13                                          | 0.17                                         |
| Novel Splicing Junctions [%]           | -0.31                                          | -0.01                                         | 0.30                                          | -0.01                                        |

**Table A30:** Spearman correlation with gene model variables (RNA-Seq, Neutrophils, standardized variables, outliers excluded).

|                                        | 1st PC (17.3%)<br>Before TMM<br>Normalization. | 2nd PC (9.9%)<br>Before TMM<br>Normalization. | 1st PC (16.1%)<br>After TMM<br>Normalization. | 2nd PC (10.8%)<br>After TMM<br>Normalization. |
|----------------------------------------|------------------------------------------------|-----------------------------------------------|-----------------------------------------------|-----------------------------------------------|
| Exon Tags [%]                          | 0.55                                           | -0.82                                         | 0.61                                          | -0.74                                         |
| Intron Tags [%]                        | -0.54                                          | 0.83                                          | -0.60                                         | 0.75                                          |
| Intergenic Tags [%]                    | -0.74                                          | 0.43                                          | -0.76                                         | 0.34                                          |
| CDS Exons Tags Per Kb                  | 0.29                                           | -0.20                                         | 0.31                                          | -0.22                                         |
| Intron Tags Per Kb                     | -0.19                                          | 0.43                                          | -0.22                                         | 0.34                                          |
| 3' UTR Tags Per Kb                     | 0.01                                           | -0.16                                         | 0.04                                          | -0.21                                         |
| 5' UTR Tags Per Kb                     | 0.46                                           | -0.04                                         | 0.46                                          | -0.05                                         |
| TSS upstream 10Kb Tags Per Kb          | -0.04                                          | 0.15                                          | -0.05                                         | 0.08                                          |
| TES downstream 10Kb Tags Per Kb        | -0.26                                          | 0.12                                          | -0.25                                         | 0.02                                          |
| Splicing Events [ $10^5$ ]             | 0.30                                           | -0.26                                         | 0.33                                          | -0.28                                         |
| Known Splicing Events [%]              | -0.31                                          | -0.60                                         | -0.27                                         | -0.59                                         |
| Partially Known Splicing Events [%]    | 0.40                                           | 0.63                                          | 0.35                                          | 0.64                                          |
| Novel Splicing Events [%]              | 0.11                                           | 0.18                                          | 0.11                                          | 0.17                                          |
| Splicing Junctions [ $10^5$ ]          | 0.20                                           | -0.06                                         | 0.22                                          | -0.08                                         |
| Known Splicing Junctions [%]           | -0.39                                          | -0.06                                         | -0.40                                         | -0.05                                         |
| Partially Known Splicing Junctions [%] | 0.42                                           | 0.13                                          | 0.42                                          | 0.12                                          |
| Novel Splicing Junctions [%]           | 0.24                                           | -0.03                                         | 0.25                                          | -0.07                                         |

**Table A31:** Spearman correlation with gene model variables (RNA-Seq, NK-cells, standardized variables, outliers excluded).

|                                        | 1st PC (17.1%)<br>Before TMM<br>Normalization. | 2nd PC (11.9%)<br>Before TMM<br>Normalization. | 1st PC (16.4%)<br>After TMM<br>Normalization. | 2nd PC (12.1%)<br>After TMM<br>Normalization. |
|----------------------------------------|------------------------------------------------|------------------------------------------------|-----------------------------------------------|-----------------------------------------------|
| Exon Tags [%]                          | 0.71                                           | 0.56                                           | 0.74                                          | 0.53                                          |
| Intron Tags [%]                        | -0.70                                          | -0.56                                          | -0.73                                         | -0.52                                         |
| Intergenic Tags [%]                    | -0.78                                          | -0.55                                          | -0.81                                         | -0.51                                         |
| CDS Exons Tags Per Kb                  | 0.22                                           | -0.13                                          | 0.22                                          | -0.14                                         |
| Intron Tags Per Kb                     | -0.33                                          | -0.43                                          | -0.35                                         | -0.41                                         |
| 3' UTR Tags Per Kb                     | -0.21                                          | -0.14                                          | -0.21                                         | -0.13                                         |
| 5' UTR Tags Per Kb                     | 0.37                                           | -0.18                                          | 0.36                                          | -0.19                                         |
| TSS upstream 10Kb Tags Per Kb          | -0.22                                          | -0.44                                          | -0.24                                         | -0.42                                         |
| TES downstream 10Kb Tags Per Kb        | -0.38                                          | -0.37                                          | -0.39                                         | -0.35                                         |
| Splicing Events [ $10^5$ ]             | 0.28                                           | -0.11                                          | 0.28                                          | -0.12                                         |
| Known Splicing Events [%]              | 0.08                                           | 0.68                                           | 0.12                                          | 0.67                                          |
| Partially Known Splicing Events [%]    | 0.09                                           | -0.63                                          | 0.04                                          | -0.64                                         |
| Novel Splicing Events [%]              | -0.19                                          | -0.51                                          | -0.21                                         | -0.50                                         |
| Splicing Junctions [ $10^5$ ]          | 0.23                                           | -0.12                                          | 0.22                                          | -0.13                                         |
| Known Splicing Junctions [%]           | -0.29                                          | 0.20                                           | -0.27                                         | 0.21                                          |
| Partially Known Splicing Junctions [%] | 0.32                                           | -0.20                                          | 0.30                                          | -0.21                                         |
| Novel Splicing Junctions [%]           | 0.16                                           | -0.30                                          | 0.14                                          | -0.31                                         |

**Table A32:** Spearman correlation with gene model variables (RNA-Seq, T-cells, standardized variables, outliers excluded).

|           | Df  | Sum Sq     | Mean Sq   | F value  | Pr(>F)  |
|-----------|-----|------------|-----------|----------|---------|
| Celltype  | 5   | 2405316.38 | 481063.28 | 30536.79 | <0.0001 |
| Subject   | 19  | 970.13     | 51.06     | 3.24     | <0.0001 |
| Day       | 2   | 54.78      | 27.39     | 1.74     | 0.1773  |
| Residuals | 333 | 5245.94    | 15.75     |          |         |

**Table A33:** Baseline sources of variation (RNA-Seq, All Cells). ANOVA results for PC1 (total explained variance=49.4%)

|           | Df  | Sum Sq    | Mean Sq   | F value  | Pr(>F)  |
|-----------|-----|-----------|-----------|----------|---------|
| Celltype  | 5   | 929050.76 | 185810.15 | 11276.63 | <0.0001 |
| Subject   | 19  | 3398.57   | 178.87    | 10.86    | <0.0001 |
| Day       | 2   | 9.31      | 4.66      | 0.28     | 0.754   |
| Residuals | 333 | 5486.99   | 16.48     |          |         |

**Table A34:** Baseline sources of variation (RNA-Seq, All Cells). ANOVA results for PC2 (total explained variance=19.2%)

|           | Df | Sum Sq    | Mean Sq | F value | Pr(>F)  |
|-----------|----|-----------|---------|---------|---------|
| Subject   | 19 | 133717.41 | 7037.76 | 18.26   | <0.0001 |
| Residuals | 40 | 15420.40  | 385.51  |         |         |

**Table A35:** Baseline sources of variation (RNA-Seq, B-cells). ANOVA results for PC1 (total explained variance=17.5%)

|           | Df | Sum Sq   | Mean Sq | F value | Pr(>F)  |
|-----------|----|----------|---------|---------|---------|
| Subject   | 19 | 75762.72 | 3987.51 | 19.87   | <0.0001 |
| Residuals | 40 | 8026.66  | 200.67  |         |         |

**Table A36:** Baseline sources of variation (RNA-Seq, B-cells). ANOVA results for PC2 (total explained variance=9.8%)

|           | Df | Sum Sq   | Mean Sq | F value | Pr(>F) |
|-----------|----|----------|---------|---------|--------|
| Subject   | 19 | 85692.32 | 4510.12 | 3.63    | 0.0003 |
| Residuals | 39 | 48464.24 | 1242.67 |         |        |

**Table A37:** Baseline sources of variation (RNA-Seq, Dendritic cells). ANOVA results for PC1 (total explained variance=17.4%)

|           | Df | Sum Sq   | Mean Sq | F value | Pr(>F)  |
|-----------|----|----------|---------|---------|---------|
| Subject   | 19 | 88998.21 | 4684.12 | 7.48    | <0.0001 |
| Residuals | 39 | 24426.66 | 626.32  |         |         |

**Table A38:** Baseline sources of variation (RNA-Seq, Dendritic cells). ANOVA results for PC2 (total explained variance=14.7%)

|           | Df | Sum Sq    | Mean Sq | F value | Pr(>F)  |
|-----------|----|-----------|---------|---------|---------|
| Subject   | 19 | 102597.23 | 5399.85 | 14.32   | <0.0001 |
| Residuals | 39 | 14708.41  | 377.14  |         |         |

**Table A39:** Baseline sources of variation (RNA-Seq, Monocytes). ANOVA results for PC1 (total explained variance=15.4%)

|           | Df | Sum Sq   | Mean Sq | F value | Pr(>F)  |
|-----------|----|----------|---------|---------|---------|
| Subject   | 19 | 87583.85 | 4609.68 | 22.65   | <0.0001 |
| Residuals | 39 | 7938.62  | 203.55  |         |         |

**Table A40:** Baseline sources of variation (RNA-Seq, Monocytes). ANOVA results for PC2 (total explained variance=12.6%)

|           | Df | Sum Sq   | Mean Sq | F value | Pr(>F)  |
|-----------|----|----------|---------|---------|---------|
| Subject   | 19 | 72085.04 | 3793.95 | 20.12   | <0.0001 |
| Residuals | 39 | 7354.10  | 188.57  |         |         |

**Table A41:** Baseline sources of variation (RNA-Seq, Neutrophils). ANOVA results for PC1 (total explained variance=12.4%)



|           | Df | Sum Sq   | Mean Sq | F value | Pr(>F)  |
|-----------|----|----------|---------|---------|---------|
| Subject   | 19 | 51558.22 | 2713.59 | 12.88   | <0.0001 |
| Residuals | 39 | 8214.03  | 210.62  |         |         |

**Table A42:** Baseline sources of variation (RNA-Seq, Neutrophils). ANOVA results for PC2 (total explained variance=9.4%)

|           | Df | Sum Sq    | Mean Sq | F value | Pr(>F)  |
|-----------|----|-----------|---------|---------|---------|
| Subject   | 19 | 105016.39 | 5527.18 | 13.96   | <0.0001 |
| Residuals | 38 | 15050.03  | 396.05  |         |         |

**Table A43:** Baseline sources of variation (RNA-Seq, NK-cells). ANOVA results for PC1 (total explained variance=14.7%)

|           | Df | Sum Sq   | Mean Sq | F value | Pr(>F)  |
|-----------|----|----------|---------|---------|---------|
| Subject   | 19 | 92908.47 | 4889.92 | 15.95   | <0.0001 |
| Residuals | 38 | 11649.44 | 306.56  |         |         |

**Table A44:** Baseline sources of variation (RNA-Seq, NK-cells). ANOVA results for PC2 (total explained variance=12.8%)

|           | Df | Sum Sq    | Mean Sq | F value | Pr(>F)  |
|-----------|----|-----------|---------|---------|---------|
| Subject   | 19 | 100623.44 | 5295.97 | 7.22    | <0.0001 |
| Residuals | 38 | 27858.49  | 733.12  |         |         |

**Table A45:** Baseline sources of variation (RNA-Seq, T-cells). ANOVA results for PC1 (total explained variance=15.5%)

|           | Df | Sum Sq   | Mean Sq | F value | Pr(>F)  |
|-----------|----|----------|---------|---------|---------|
| Subject   | 19 | 85656.24 | 4508.22 | 21.21   | <0.0001 |
| Residuals | 38 | 8076.98  | 212.55  |         |         |

**Table A46:** Baseline sources of variation (RNA-Seq, T-cells). ANOVA results for PC2 (total explained variance=11.3%)

| Gene ID         | Gene Name | Gene Description                                                                                                        | Coefficient of Determination |
|-----------------|-----------|-------------------------------------------------------------------------------------------------------------------------|------------------------------|
| ENSG00000141522 | ARHGDI2A  | Rho GDP dissociation inhibitor (GDI) alpha [Source:HGNC Symbol;Acc:678]                                                 | 0.88                         |
| ENSG00000102879 | CORO1A    | coronin, actin binding protein, 1A [Source:HGNC Symbol;Acc:2252]                                                        | 0.88                         |
| ENSG00000196961 | AP2A1     | adaptor-related protein complex 2, alpha 1 subunit [Source:HGNC Symbol;Acc:561]                                         | 0.86                         |
| ENSG00000188994 | ZNF292    | zinc finger protein 292 [Source:HGNC Symbol;Acc:18410]                                                                  | 0.86                         |
| ENSG00000163714 | U2SURP    | U2 snRNP-associated SURP domain containing [Source:HGNC Symbol;Acc:30855]                                               | 0.85                         |
| ENSG00000137770 | CTDSPL2   | CTD (carboxy-terminal domain, RNA polymerase II, polypeptide A) small phosphatase like 2 [Source:HGNC Symbol;Acc:26936] | 0.85                         |
| ENSG00000113441 | LNPEP     | leucyl/cystinyl aminopeptidase [Source:HGNC Symbol;Acc:6656]                                                            | 0.84                         |
| ENSG00000167671 | UBXN6     | UBX domain protein 6 [Source:HGNC Symbol;Acc:14928]                                                                     | 0.84                         |
| ENSG00000105701 | FKBP8     | FK506 binding protein 8, 38kDa [Source:HGNC Symbol;Acc:3724]                                                            | 0.84                         |
| ENSG00000112200 | ZNF451    | zinc finger protein 451 [Source:HGNC Symbol;Acc:21091]                                                                  | 0.84                         |
| ENSG00000142186 | SCYL1     | SCY1-like 1 (S. cerevisiae) [Source:HGNC Symbol;Acc:14372]                                                              | 0.84                         |
| ENSG00000144747 | TMF1      | TATA element modulatory factor 1 [Source:HGNC Symbol;Acc:11870]                                                         | 0.84                         |
| ENSG00000075292 | ZNF638    | zinc finger protein 638 [Source:HGNC Symbol;Acc:17894]                                                                  | 0.83                         |
| ENSG00000159069 | FBXW5     | F-box and WD repeat domain containing 5 [Source:HGNC Symbol;Acc:13613]                                                  | 0.83                         |
| ENSG00000083312 | TNPO1     | transportin 1 [Source:HGNC Symbol;Acc:6401]                                                                             | 0.82                         |
| ENSG00000103653 | CSK       | c-src tyrosine kinase [Source:HGNC Symbol;Acc:2444]                                                                     | 0.82                         |
| ENSG00000089693 | MLF2      | myeloid leukemia factor 2 [Source:HGNC Symbol;Acc:7126]                                                                 | 0.82                         |
| ENSG00000138592 | USP8      | ubiquitin specific peptidase 8 [Source:HGNC Symbol;Acc:12631]                                                           | 0.82                         |
| ENSG00000188986 | COBRA1    | cofactor of BRCA1 [Source:HGNC Symbol;Acc:24324]                                                                        | 0.82                         |
| ENSG00000110711 | AIP       | aryl hydrocarbon receptor interacting protein [Source:HGNC Symbol;Acc:358]                                              | 0.82                         |
| ENSG00000160410 | SHKBP1    | SH3KBP1 binding protein 1 [Source:HGNC Symbol;Acc:19214]                                                                | 0.82                         |
| ENSG00000033867 | SLC4A7    | solute carrier family 4, sodium bicarbonate cotransporter, member 7 [Source:HGNC Symbol;Acc:11033]                      | 0.81                         |
| ENSG00000128585 | MKLN1     | muskelin 1, intracellular mediator containing kelch motifs [Source:HGNC Symbol;Acc:7109]                                | 0.81                         |
| ENSG00000120802 | TMPO      | thymopoietin [Source:HGNC Symbol;Acc:11875]                                                                             | 0.81                         |
| ENSG00000087088 | BAX       | BCL2-associated X protein [Source:HGNC Symbol;Acc:959]                                                                  | 0.81                         |
| ENSG00000198887 | SMC5      | structural maintenance of chromosomes 5 [Source:HGNC Symbol;Acc:20465]                                                  | 0.81                         |
| ENSG00000065243 | PKN2      | protein kinase N2 [Source:HGNC Symbol;Acc:9406]                                                                         | 0.81                         |
| ENSG00000092439 | TRPM7     | transient receptor potential cation channel, subfamily M, member 7 [Source:HGNC Symbol;Acc:17994]                       | 0.81                         |
| ENSG00000130429 | ARPC1B    | actin related protein 2/3 complex, subunit 1B, 41kDa [Source:HGNC Symbol;Acc:704]                                       | 0.81                         |

**Table A47:** Genes with high baseline variability (RNA-Seq, B-cells, PC1 (17.5%)). Coefficient of determination > 0.80 (>80% explained variance.)

| Gene ID         | Gene Name | Gene Description                                                                     | Coefficient of Determination |
|-----------------|-----------|--------------------------------------------------------------------------------------|------------------------------|
| ENSG00000136286 | MYO1G     | myosin IG [Source:HGNC Symbol;Acc:13880]                                             | 0.95                         |
| ENSG00000196961 | AP2A1     | adaptor-related protein complex 2, alpha 1 subunit [Source:HGNC Symbol;Acc:561]      | 0.94                         |
| ENSG00000173542 | MOBK1A    | MOB1, Mps One Binder kinase activator-like 1A (yeast) [Source:HGNC Symbol;Acc:29801] | 0.90                         |
| ENSG00000090554 | FLT3LG    | fms-related tyrosine kinase 3 ligand [Source:HGNC Symbol;Acc:3766]                   | 0.89                         |

| Gene ID         | Gene Name | Gene Description                                                                                                   | Coefficient of Determination |
|-----------------|-----------|--------------------------------------------------------------------------------------------------------------------|------------------------------|
| ENSG00000160883 | HK3       | hexokinase 3 (white cell) [Source:HGNC Symbol;Acc:4925]                                                            | 0.88                         |
| ENSG00000110697 | PITPNM1   | phosphatidylinositol transfer protein, membrane-associated 1 [Source:HGNC Symbol;Acc:9003]                         | 0.88                         |
| ENSG00000146094 | DOK3      | docking protein 3 [Source:HGNC Symbol;Acc:24583]                                                                   | 0.87                         |
| ENSG00000171777 | RASGRP4   | RAS guanyl releasing protein 4 [Source:HGNC Symbol;Acc:18958]                                                      | 0.87                         |
| ENSG00000076944 | STXBP2    | syntaxin binding protein 2 [Source:HGNC Symbol;Acc:11445]                                                          | 0.87                         |
| ENSG00000186635 | ARAP1     | ArfGAP with RhoGAP domain, ankyrin repeat and PH domain 1 [Source:HGNC Symbol;Acc:16925]                           | 0.87                         |
| ENSG00000090674 | MCOLN1    | mucolipin 1 [Source:HGNC Symbol;Acc:13356]                                                                         | 0.87                         |
| ENSG00000107954 | NEURL     | neuralized homolog (Drosophila) [Source:HGNC Symbol;Acc:7761]                                                      | 0.87                         |
| ENSG00000099992 | TBC1D10A  | TBC1 domain family, member 10A [Source:HGNC Symbol;Acc:23609]                                                      | 0.87                         |
| ENSG00000100852 | ARHGAP5   | Rho GTPase activating protein 5 [Source:HGNC Symbol;Acc:675]                                                       | 0.87                         |
| ENSG00000095370 | SH2D3C    | SH2 domain containing 3C [Source:HGNC Symbol;Acc:16884]                                                            | 0.86                         |
| ENSG00000144579 | CTDSP1    | CTD (carboxy-terminal domain, RNA polymerase II, polypeptide A) small phosphatase 1 [Source:HGNC Symbol;Acc:21614] | 0.86                         |
| ENSG00000006459 | JHDM1D    | jumonji C domain containing histone demethylase 1 homolog D (S. cerevisiae) [Source:HGNC Symbol;Acc:22224]         | 0.86                         |
| ENSG00000028137 | TNFRSF1B  | tumor necrosis factor receptor superfamily, member 1B [Source:HGNC Symbol;Acc:11917]                               | 0.86                         |
| ENSG00000111371 | SLC38A1   | solute carrier family 38, member 1 [Source:HGNC Symbol;Acc:13447]                                                  | 0.85                         |
| ENSG00000104164 | PLDN      | pallidin homolog (mouse) [Source:HGNC Symbol;Acc:8549]                                                             | 0.85                         |
| ENSG00000099308 | MAST3     | microtubule associated serine/threonine kinase 3 [Source:HGNC Symbol;Acc:19036]                                    | 0.85                         |
| ENSG00000204592 | HLA-E     | major histocompatibility complex, class I, E [Source:HGNC Symbol;Acc:4962]                                         | 0.85                         |
| ENSG00000123143 | PKN1      | protein kinase N1 [Source:HGNC Symbol;Acc:9405]                                                                    | 0.85                         |
| ENSG00000160570 | DEDD2     | death effector domain containing 2 [Source:HGNC Symbol;Acc:24450]                                                  | 0.85                         |
| ENSG00000119403 | PHF19     | PHD finger protein 19 [Source:HGNC Symbol;Acc:24566]                                                               | 0.84                         |
| ENSG00000105287 | PRKD2     | protein kinase D2 [Source:HGNC Symbol;Acc:17293]                                                                   | 0.84                         |
| ENSG00000151746 | BICD1     | bicaudal D homolog 1 (Drosophila) [Source:HGNC Symbol;Acc:1049]                                                    | 0.83                         |
| ENSG00000170017 | ALCAM     | activated leukocyte cell adhesion molecule [Source:HGNC Symbol;Acc:400]                                            | 0.83                         |
| ENSG00000160999 | SH2B2     | SH2B adaptor protein 2 [Source:HGNC Symbol;Acc:17381]                                                              | 0.83                         |
| ENSG00000008869 | HEATR5B   | HEAT repeat containing 5B [Source:HGNC Symbol;Acc:29273]                                                           | 0.82                         |
| ENSG00000173020 | ADRBK1    | adrenergic, beta, receptor kinase 1 [Source:HGNC Symbol;Acc:289]                                                   | 0.82                         |
| ENSG00000168067 | MAP4K2    | mitogen-activated protein kinase kinase kinase kinase 2 [Source:HGNC Symbol;Acc:6864]                              | 0.82                         |
| ENSG00000134294 | SLC38A2   | solute carrier family 38, member 2 [Source:HGNC Symbol;Acc:13448]                                                  | 0.82                         |
| ENSG00000105122 | RASAL3    | RAS protein activator like 3 [Source:HGNC Symbol;Acc:26129]                                                        | 0.82                         |
| ENSG00000175489 | LRRC25    | leucine rich repeat containing 25 [Source:HGNC Symbol;Acc:29806]                                                   | 0.82                         |
| ENSG00000007312 | CD79B     | CD79b molecule, immunoglobulin-associated beta [Source:HGNC Symbol;Acc:1699]                                       | 0.82                         |
| ENSG00000198925 | ATG9A     | ATG9 autophagy related 9 homolog A (S. cerevisiae) [Source:HGNC Symbol;Acc:22408]                                  | 0.82                         |
| ENSG00000125898 | FAM110A   | family with sequence similarity 110, member A [Source:HGNC Symbol;Acc:16188]                                       | 0.82                         |
| ENSG00000104205 | SGK3      | serum/glucocorticoid regulated kinase family, member 3 [Source:HGNC Symbol;Acc:10812]                              | 0.82                         |
| ENSG00000178950 | GAK       | cyclin G associated kinase [Source:HGNC Symbol;Acc:4113]                                                           | 0.82                         |
| ENSG00000175550 | DRAP1     | DR1-associated protein 1 (negative cofactor 2 alpha) [Source:HGNC Symbol;Acc:3019]                                 | 0.82                         |
| ENSG00000186350 | RXRA      | retinoid X receptor, alpha [Source:HGNC Symbol;Acc:10477]                                                          | 0.82                         |
| ENSG00000196839 | ADA       | adenosine deaminase [Source:HGNC Symbol;Acc:186]                                                                   | 0.81                         |

| Gene ID         | Gene Name | Gene Description                                                                                                             | Coefficient of Determination |
|-----------------|-----------|------------------------------------------------------------------------------------------------------------------------------|------------------------------|
| ENSG00000101412 | E2F1      | E2F transcription factor 1 [Source:HGNC Symbol;Acc:3113]                                                                     | 0.81                         |
| ENSG00000136636 | KCTD3     | potassium channel tetramerisation domain containing 3 [Source:HGNC Symbol;Acc:21305]                                         | 0.81                         |
| ENSG00000178719 | GRINA     | glutamate receptor, ionotropic, N-methyl D-aspartate-associated protein 1 (glutamate binding) [Source:HGNC Symbol;Acc:4589]  | 0.81                         |
| ENSG00000198055 | GRK6      | G protein-coupled receptor kinase 6 [Source:HGNC Symbol;Acc:4545]                                                            | 0.81                         |
| ENSG00000187531 | SIRT7     | sirtuin 7 [Source:HGNC Symbol;Acc:14935]                                                                                     | 0.81                         |
| ENSG00000063854 | HAGH      | hydroxyacylglutathione hydrolase [Source:HGNC Symbol;Acc:4805]                                                               | 0.81                         |
| ENSG00000205268 | PDE7A     | phosphodiesterase 7A [Source:HGNC Symbol;Acc:8791]                                                                           | 0.81                         |
| ENSG00000130511 | SSBP4     | single stranded DNA binding protein 4 [Source:HGNC Symbol;Acc:15676]                                                         | 0.81                         |
| ENSG00000152133 | CCDC75    | coiled-coil domain containing 75 [Source:HGNC Symbol;Acc:26768]                                                              | 0.81                         |
| ENSG00000130382 | MLLT1     | myeloid/lymphoid or mixed-lineage leukemia (trithorax homolog, Drosophila); translocated to, 1 [Source:HGNC Symbol;Acc:7134] | 0.81                         |
| ENSG00000111679 | PTPN6     | protein tyrosine phosphatase, non-receptor type 6 [Source:HGNC Symbol;Acc:9658]                                              | 0.81                         |

**Table A48:** Genes with high baseline variability (RNA-Seq, Dendritic cells, PC1 (17.4%)). Coefficient of determination > 0.80 (>80% explained variance.)

| Gene ID         | Gene Name | Gene Description                                                                                                        | Coefficient of Determination |
|-----------------|-----------|-------------------------------------------------------------------------------------------------------------------------|------------------------------|
| ENSG00000172531 | PPP1CA    | protein phosphatase 1, catalytic subunit, alpha isozyme [Source:HGNC Symbol;Acc:9281]                                   | 0.91                         |
| ENSG00000105723 | GSK3A     | glycogen synthase kinase 3 alpha [Source:HGNC Symbol;Acc:4616]                                                          | 0.87                         |
| ENSG00000072958 | AP1M1     | adaptor-related protein complex 1, mu 1 subunit [Source:HGNC Symbol;Acc:13667]                                          | 0.87                         |
| ENSG00000010256 | UQCRC1    | ubiquinol-cytochrome c reductase core protein I [Source:HGNC Symbol;Acc:12585]                                          | 0.87                         |
| ENSG00000149925 | ALDOA     | aldolase A, fructose-bisphosphate [Source:HGNC Symbol;Acc:414]                                                          | 0.87                         |
| ENSG00000125970 | RALY      | RNA binding protein, autoantigenic (hnRNP-associated with lethal yellow homolog (mouse)) [Source:HGNC Symbol;Acc:15921] | 0.87                         |
| ENSG00000124155 | PIGT      | phosphatidylinositol glycan anchor biosynthesis, class T [Source:HGNC Symbol;Acc:14938]                                 | 0.86                         |
| ENSG00000114353 | GNAI2     | guanine nucleotide binding protein (G protein), alpha inhibiting activity polypeptide 2 [Source:HGNC Symbol;Acc:4385]   | 0.86                         |
| ENSG00000116685 | KIAA2013  | KIAA2013 [Source:HGNC Symbol;Acc:28513]                                                                                 | 0.85                         |
| ENSG00000089327 | FXYD5     | FXYD domain containing ion transport regulator 5 [Source:HGNC Symbol;Acc:4029]                                          | 0.85                         |
| ENSG00000101745 | ANKRD12   | ankyrin repeat domain 12 [Source:HGNC Symbol;Acc:29135]                                                                 | 0.84                         |
| ENSG00000105568 | PPP2R1A   | protein phosphatase 2, regulatory subunit A, alpha [Source:HGNC Symbol;Acc:9302]                                        | 0.84                         |
| ENSG00000103502 | CDIPT     | CDP-diacylglycerol-inositol 3-phosphatidyltransferase [Source:HGNC Symbol;Acc:1769]                                     | 0.84                         |
| ENSG00000110446 | SLC15A3   | solute carrier family 15, member 3 [Source:HGNC Symbol;Acc:18068]                                                       | 0.84                         |
| ENSG00000074800 | ENO1      | enolase 1, (alpha) [Source:HGNC Symbol;Acc:3350]                                                                        | 0.84                         |
| ENSG00000105669 | COPE      | coatamer protein complex, subunit epsilon [Source:HGNC Symbol;Acc:2234]                                                 | 0.84                         |
| ENSG00000127914 | AKAP9     | A kinase (PRKA) anchor protein (yotiao) 9 [Source:HGNC Symbol;Acc:379]                                                  | 0.83                         |
| ENSG00000100354 | TNRC6B    | trinucleotide repeat containing 6B [Source:HGNC Symbol;Acc:29190]                                                       | 0.83                         |
| ENSG00000179950 | PUF60     | poly-U binding splicing factor 60kDa [Source:HGNC Symbol;Acc:17042]                                                     | 0.83                         |
| ENSG00000181817 | LSM10     | LSM10, U7 small nuclear RNA associated [Source:HGNC Symbol;Acc:17562]                                                   | 0.83                         |

| Gene ID         | Gene Name     | Gene Description                                                                                                 | Coefficient of Determination |
|-----------------|---------------|------------------------------------------------------------------------------------------------------------------|------------------------------|
| ENSG00000177105 | RHOG          | ras homolog gene family, member G (rho G) [Source:HGNC Symbol;Acc:672]                                           | 0.83                         |
| ENSG00000066322 | ELOVL1        | elongation of very long chain fatty acids (FEN1/Elo2, SUR4/Elo3, yeast)-like 1 [Source:HGNC Symbol;Acc:14418]    | 0.83                         |
| ENSG00000172757 | CFL1          | cofilin 1 (non-muscle) [Source:HGNC Symbol;Acc:1874]                                                             | 0.82                         |
| ENSG00000108528 | SLC25A11      | solute carrier family 25 (mitochondrial carrier; oxoglutarate carrier), member 11 [Source:HGNC Symbol;Acc:10981] | 0.82                         |
| ENSG00000099341 | PSMD8         | proteasome (prosome, macropain) 26S subunit, non-ATPase, 8 [Source:HGNC Symbol;Acc:9566]                         | 0.82                         |
| ENSG00000126934 | MAP2K2        | mitogen-activated protein kinase kinase 2 [Source:HGNC Symbol;Acc:6842]                                          | 0.81                         |
| ENSG00000105701 | FKBP8         | FK506 binding protein 8, 38kDa [Source:HGNC Symbol;Acc:3724]                                                     | 0.81                         |
| ENSG00000249348 | RP11-814P23.1 |                                                                                                                  | 0.81                         |
| ENSG00000188994 | ZNF292        | zinc finger protein 292 [Source:HGNC Symbol;Acc:18410]                                                           | 0.81                         |
| ENSG00000130429 | ARPC1B        | actin related protein 2/3 complex, subunit 1B, 41kDa [Source:HGNC Symbol;Acc:704]                                | 0.81                         |
| ENSG00000108774 | RAB5C         | RAB5C, member RAS oncogene family [Source:HGNC Symbol;Acc:9785]                                                  | 0.81                         |
| ENSG00000189180 | ZNF33A        | zinc finger protein 33A [Source:HGNC Symbol;Acc:13096]                                                           | 0.81                         |
| ENSG00000161203 | AP2M1         | adaptor-related protein complex 2, mu 1 subunit [Source:HGNC Symbol;Acc:564]                                     | 0.81                         |

**Table A49:** Genes with high baseline variability (RNA-Seq, Monocytes, PC1 (15.4%)). Coefficient of determination > 0.80 (>80% explained variance.)

| Gene ID         | Gene Name | Gene Description                                                                                                             | Coefficient of Determination |
|-----------------|-----------|------------------------------------------------------------------------------------------------------------------------------|------------------------------|
| ENSG00000144118 | RALB      | v-ral simian leukemia viral oncogene homolog B (ras related; GTP binding protein) [Source:HGNC Symbol;Acc:9840]              | 0.85                         |
| ENSG00000103168 | TAF1C     | TATA box binding protein (TBP)-associated factor, RNA polymerase I, C, 110kDa [Source:HGNC Symbol;Acc:11534]                 | 0.83                         |
| ENSG00000176953 | NFATC2IP  | nuclear factor of activated T-cells, cytoplasmic, calcineurin-dependent 2 interacting protein [Source:HGNC Symbol;Acc:25906] | 0.82                         |
| ENSG00000109332 | UBE2D3    | ubiquitin-conjugating enzyme E2D 3 (UBC4/5 homolog, yeast) [Source:HGNC Symbol;Acc:12476]                                    | 0.82                         |
| ENSG00000165006 | UBAP1     | ubiquitin associated protein 1 [Source:HGNC Symbol;Acc:12461]                                                                | 0.81                         |

**Table A50:** Genes with high baseline variability (RNA-Seq, Neutrophils, PC1 (12.4%)). Coefficient of determination > 0.80 (>80% explained variance.)

| Gene ID         | Gene Name | Gene Description                                                                         | Coefficient of Determination |
|-----------------|-----------|------------------------------------------------------------------------------------------|------------------------------|
| ENSG00000182087 | C19orf6   | chromosome 19 open reading frame 6 [Source:HGNC Symbol;Acc:17039]                        | 0.87                         |
| ENSG00000127419 | TMEM175   | transmembrane protein 175 [Source:HGNC Symbol;Acc:28709]                                 | 0.86                         |
| ENSG00000141258 | SGSM2     | small G protein signaling modulator 2 [Source:HGNC Symbol;Acc:29026]                     | 0.86                         |
| ENSG00000140983 | RHOT2     | ras homolog gene family, member T2 [Source:HGNC Symbol;Acc:21169]                        | 0.86                         |
| ENSG00000131584 | ACAP3     | ArfGAP with coiled-coil, ankyrin repeat and PH domains 3 [Source:HGNC Symbol;Acc:16754]  | 0.85                         |
| ENSG00000176978 | DPP7      | dipeptidyl-peptidase 7 [Source:HGNC Symbol;Acc:14892]                                    | 0.85                         |
| ENSG00000167302 | C17orf56  | chromosome 17 open reading frame 56 [Source:HGNC Symbol;Acc:26458]                       | 0.85                         |
| ENSG00000103249 | CLCN7     | chloride channel 7 [Source:HGNC Symbol;Acc:2025]                                         | 0.84                         |
| ENSG00000125503 | PPP1R12C  | protein phosphatase 1, regulatory (inhibitor) subunit 12C [Source:HGNC Symbol;Acc:14947] | 0.84                         |

| Gene ID         | Gene Name    | Gene Description                                                                          | Coefficient of Determination |
|-----------------|--------------|-------------------------------------------------------------------------------------------|------------------------------|
| ENSG00000242802 | KIAA0415     | KIAA0415 [Source:HGNC Symbol;Acc:22197]                                                   | 0.84                         |
| ENSG00000101199 | ARFGAP1      | ADP-ribosylation factor GTPase activating protein 1 [Source:HGNC Symbol;Acc:15852]        | 0.84                         |
| ENSG00000197070 | ARRDC1       | arrestin domain containing 1 [Source:HGNC Symbol;Acc:28633]                               | 0.83                         |
| ENSG00000138834 | MAPK8IP3     | mitogen-activated protein kinase 8 interacting protein 3 [Source:HGNC Symbol;Acc:6884]    | 0.83                         |
| ENSG00000149541 | B3GAT3       | beta-1,3-glucuronyltransferase 3 (glucuronosyltransferase I) [Source:HGNC Symbol;Acc:923] | 0.83                         |
| ENSG00000162032 | SPSB3        | splA/ryanodine receptor domain and SOCS box containing 3 [Source:HGNC Symbol;Acc:30629]   | 0.83                         |
| ENSG00000073169 | RP3-402G11.5 | Selenoprotein O [Source:UniProtKB/Swiss-Prot;Acc:Q9BVL4]                                  | 0.82                         |
| ENSG00000149499 | EML3         | echinoderm microtubule associated protein like 3 [Source:HGNC Symbol;Acc:26666]           | 0.82                         |
| ENSG00000091039 | OSBPL8       | oxysterol binding protein-like 8 [Source:HGNC Symbol;Acc:16396]                           | 0.82                         |
| ENSG00000076928 | ARHGEF1      | Rho guanine nucleotide exchange factor (GEF) 1 [Source:HGNC Symbol;Acc:681]               | 0.82                         |
| ENSG00000142330 | CAPN10       | calpain 10 [Source:HGNC Symbol;Acc:1477]                                                  | 0.81                         |
| ENSG00000176248 | ANAPC2       | anaphase promoting complex subunit 2 [Source:HGNC Symbol;Acc:19989]                       | 0.81                         |
| ENSG00000104960 | PTOV1        | prostate tumor overexpressed 1 [Source:HGNC Symbol;Acc:9632]                              | 0.81                         |

**Table A51:** Genes with high baseline variability (RNA-Seq, NK-cells, PC1 (14.7%)). Coefficient of determination > 0.80 (>80% explained variance.)

| Gene ID         | Gene Name | Gene Description                                                                                  | Coefficient of Determination |
|-----------------|-----------|---------------------------------------------------------------------------------------------------|------------------------------|
| ENSG00000102879 | CORO1A    | coronin, actin binding protein, 1A [Source:HGNC Symbol;Acc:2252]                                  | 0.90                         |
| ENSG00000011009 | LYPLA2    | lysophospholipase II [Source:HGNC Symbol;Acc:6738]                                                | 0.87                         |
| ENSG00000169727 | GPS1      | G protein pathway suppressor 1 [Source:HGNC Symbol;Acc:4549]                                      | 0.86                         |
| ENSG00000185236 | RAB11B    | RAB11B, member RAS oncogene family [Source:HGNC Symbol;Acc:9761]                                  | 0.85                         |
| ENSG00000145907 | G3BP1     | GTPase activating protein (SH3 domain) binding protein 1 [Source:HGNC Symbol;Acc:30292]           | 0.84                         |
| ENSG00000176978 | DPP7      | dipeptidyl-peptidase 7 [Source:HGNC Symbol;Acc:14892]                                             | 0.83                         |
| ENSG00000112200 | ZNF451    | zinc finger protein 451 [Source:HGNC Symbol;Acc:21091]                                            | 0.83                         |
| ENSG00000099817 | POLR2E    | polymerase (RNA) II (DNA directed) polypeptide E, 25kDa [Source:HGNC Symbol;Acc:9192]             | 0.82                         |
| ENSG00000176101 | SSNA1     | Sjogren syndrome nuclear autoantigen 1 [Source:HGNC Symbol;Acc:11321]                             | 0.82                         |
| ENSG00000105701 | FKBP8     | FK506 binding protein 8, 38kDa [Source:HGNC Symbol;Acc:3724]                                      | 0.82                         |
| ENSG00000186010 | NDUFA13   | NADH dehydrogenase (ubiquinone) 1 alpha subcomplex, 13 [Source:HGNC Symbol;Acc:17194]             | 0.82                         |
| ENSG00000141985 | SH3GL1    | SH3-domain GRB2-like 1 [Source:HGNC Symbol;Acc:10830]                                             | 0.82                         |
| ENSG00000092439 | TRPM7     | transient receptor potential cation channel, subfamily M, member 7 [Source:HGNC Symbol;Acc:17994] | 0.82                         |
| ENSG00000162032 | SPSB3     | splA/ryanodine receptor domain and SOCS box containing 3 [Source:HGNC Symbol;Acc:30629]           | 0.82                         |
| ENSG00000164897 | TMUB1     | transmembrane and ubiquitin-like domain containing 1 [Source:HGNC Symbol;Acc:21709]               | 0.82                         |
| ENSG00000153922 | CHD1      | chromodomain helicase DNA binding protein 1 [Source:HGNC Symbol;Acc:1915]                         | 0.81                         |
| ENSG00000197114 | ZGPAT     | zinc finger, CCCH-type with G patch domain [Source:HGNC Symbol;Acc:15948]                         | 0.81                         |

| Gene ID         | Gene Name | Gene Description                                                                                | Coefficient of Determination |
|-----------------|-----------|-------------------------------------------------------------------------------------------------|------------------------------|
| ENSG00000196504 | PRPF40A   | PRP40 pre-mRNA processing factor 40 homolog A (S. cerevisiae)<br>[Source:HGNC Symbol;Acc:16463] | 0.81                         |
| ENSG00000063244 | U2AF2     | U2 small nuclear RNA auxiliary factor 2 [Source:HGNC Symbol;Acc:23156]                          | 0.81                         |
| ENSG00000142186 | SCYL1     | SCY1-like 1 (S. cerevisiae) [Source:HGNC Symbol;Acc:14372]                                      | 0.81                         |

**Table A52:** Genes with high baseline variability (RNA-Seq, T-cells, PC1 (15.5%)). Coefficient of determination > 0.80 (>80% explained variance.)

| Cell Type       | Day | Genes<br>(3 days) | Genes<br>(2 days) | Genes<br>(1 day) | Sensitivity<br>(2 days) | Sensitivity<br>(1 day) | FDR (2<br>days) | FDR (1<br>day) |
|-----------------|-----|-------------------|-------------------|------------------|-------------------------|------------------------|-----------------|----------------|
| B-cells         | 1   | 30                | 35                | 76               | 0.87                    | 0.90                   | 0.26            | 0.64           |
| B-cells         | 3   | 58                | 65                | 85               | 0.95                    | 0.91                   | 0.15            | 0.38           |
| Dendritic cells | 1   | 230               | 221               | 256              | 0.88                    | 0.90                   | 0.08            | 0.19           |
| Dendritic cells | 3   | 33                | 34                | 58               | 0.76                    | 0.73                   | 0.26            | 0.59           |
| Monocytes       | 1   | 421               | 445               | 473              | 0.94                    | 0.93                   | 0.11            | 0.17           |
| Monocytes       | 3   | 37                | 34                | 53               | 0.78                    | 0.78                   | 0.15            | 0.45           |
| Neutrophils     | 1   | 742               | 811               | 853              | 0.97                    | 0.95                   | 0.11            | 0.17           |
| Neutrophils     | 3   | 143               | 144               | 179              | 0.94                    | 0.93                   | 0.07            | 0.26           |
| NK-cells        | 1   | 106               | 73                | 99               | 0.60                    | 0.61                   | 0.12            | 0.34           |
| NK-cells        | 3   | 94                | 99                | 132              | 0.94                    | 0.99                   | 0.11            | 0.30           |
| T-cells         | 1   | 57                | 57                | 93               | 0.89                    | 0.93                   | 0.11            | 0.43           |
| T-cells         | 3   | 5                 | 10                | 30               | 0.80                    | 0.60                   | 0.60            | 0.90           |

**Table A53:** Impact of using multiple baseline measures on gene response (RNA-Seq). Genes were selected based on a mean fold change  $\geq 1.5$  (up or down) in the SV-AS03 group. Sensitivity and FDR were calculated by comparing gene lists obtained when using the mean of one (day 0) or two baseline days (day 0, -14) to the list obtained when using the mean of three baseline days (day 0, -14, -28).

| Gene Type              | B-cells<br>Day 1 | Dendritic<br>cells Day<br>1 | Dendritic<br>cells Day<br>3 | Monocytes<br>Day 1 | Neutrophils<br>Day 1 | Neutrophils<br>Day 3 | Neutrophils<br>Day 28 | NK-cells<br>Day 1 | NK-cells<br>Day 3 | NK-cells<br>Day 7 | NK-cells<br>Day 28 | T-cells<br>Day 1 |
|------------------------|------------------|-----------------------------|-----------------------------|--------------------|----------------------|----------------------|-----------------------|-------------------|-------------------|-------------------|--------------------|------------------|
| protein coding         | 14               | 189                         | 11                          | 333                | 499                  | 124                  | 1                     | 21                | 68                | 1                 | 61                 | 44               |
| processed transcript   | 0                | 16                          | 1                           | 33                 | 30                   | 11                   | 0                     | 0                 | 1                 | 0                 | 1                  | 1                |
| pseudogene             | 0                | 10                          | 1                           | 23                 | 22                   | 3                    | 0                     | 0                 | 1                 | 0                 | 0                  | 1                |
| lincRNA                | 0                | 8                           | 0                           | 7                  | 17                   | 2                    | 0                     | 1                 | 0                 | 0                 | 1                  | 2                |
| snoRNA                 | 0                | 1                           | 0                           | 3                  | 0                    | 0                    | 0                     | 1                 | 0                 | 0                 | 0                  | 0                |
| misc RNA               | 0                | 0                           | 0                           | 1                  | 2                    | 0                    | 0                     | 0                 | 0                 | 0                 | 0                  | 1                |
| scRNA pseudogene       | 0                | 0                           | 0                           | 2                  | 1                    | 0                    | 0                     | 0                 | 0                 | 0                 | 0                  | 0                |
| IG C pseudogene        | 0                | 1                           | 0                           | 1                  | 0                    | 0                    | 0                     | 0                 | 0                 | 0                 | 0                  | 0                |
| snRNA                  | 0                | 0                           | 0                           | 1                  | 1                    | 0                    | 0                     | 0                 | 0                 | 0                 | 0                  | 0                |
| miRNA                  | 0                | 0                           | 0                           | 1                  | 0                    | 0                    | 0                     | 1                 | 0                 | 0                 | 0                  | 0                |
| polymorphic pseudogene | 0                | 0                           | 0                           | 1                  | 0                    | 0                    | 0                     | 0                 | 0                 | 0                 | 0                  | 0                |

**Table A54:** Statistically significant genes by gene type, cell type, and day (RNA-Seq).

| Gene Type              | B-cells | Dendritic<br>cells | Monocytes | Neutrophils | NK-cells | T-cells |
|------------------------|---------|--------------------|-----------|-------------|----------|---------|
| protein coding         | 14      | 192                | 333       | 528         | 150      | 44      |
| processed transcript   | 0       | 17                 | 33        | 36          | 2        | 1       |
| pseudogene             | 0       | 10                 | 23        | 24          | 1        | 1       |
| lincRNA                | 0       | 8                  | 7         | 18          | 2        | 2       |
| snoRNA                 | 0       | 1                  | 3         | 0           | 1        | 0       |
| misc RNA               | 0       | 0                  | 1         | 2           | 0        | 1       |
| scRNA pseudogene       | 0       | 0                  | 2         | 1           | 0        | 0       |
| IG C pseudogene        | 0       | 1                  | 1         | 0           | 0        | 0       |
| snRNA                  | 0       | 0                  | 1         | 1           | 0        | 0       |
| miRNA                  | 0       | 0                  | 1         | 0           | 1        | 0       |
| polymorphic pseudogene | 0       | 0                  | 1         | 0           | 0        | 0       |

**Table A55:** Statistically significant genes by gene type and cell type (RNA-Seq).



|                 | B-cells | Dendritic cells | Monocytes | Neutrophils | NK-cells | T-cells |
|-----------------|---------|-----------------|-----------|-------------|----------|---------|
| B-cells         | -       | 12              | 12        | 12          | 6        | 11      |
| Dendritic cells | 12      | -               | 130       | 90          | 14       | 29      |
| Monocytes       | 12      | 130             | -         | 138         | 15       | 32      |
| Neutrophils     | 12      | 90              | 138       | -           | 14       | 35      |
| NK-cells        | 6       | 14              | 15        | 14          | -        | 15      |
| T-cells         | 11      | 29              | 32        | 35          | 15       | -       |

**Table A56:** Overlap of significantly differentially expressed genes between cell types (RNA-Seq, Day 1)

| Gene ID         | Gene Name | Gene Description                                                                         | B-cells<br><i>Log</i> <sub>2</sub><br>Fold<br>Change | Dendritic<br>cells<br><i>Log</i> <sub>2</sub><br>Fold<br>Change | Monocytes<br><i>Log</i> <sub>2</sub><br>Fold<br>Change | Neutrophils<br><i>Log</i> <sub>2</sub><br>Fold<br>Change | NK-cells<br><i>Log</i> <sub>2</sub><br>Fold<br>Change | T-cells<br><i>Log</i> <sub>2</sub><br>Fold<br>Change |
|-----------------|-----------|------------------------------------------------------------------------------------------|------------------------------------------------------|-----------------------------------------------------------------|--------------------------------------------------------|----------------------------------------------------------|-------------------------------------------------------|------------------------------------------------------|
| ENSG00000133106 | EPST11    | epithelial stromal interaction 1 (breast) [Source:HGNC Symbol;Acc:16465]                 | 0.59                                                 | 1.06                                                            | 1.14                                                   | 1.08                                                     | 0.76                                                  | 1.12                                                 |
| ENSG00000117228 | GBP1      | guanylate binding protein 1, interferon-inducible [Source:HGNC Symbol;Acc:4182]          | 1.33                                                 | 1.86                                                            | 2.67                                                   | 2.17                                                     | 1.21                                                  | 1.24                                                 |
| ENSG00000125347 | IRF1      | interferon regulatory factor 1 [Source:HGNC Symbol;Acc:6116]                             | 1.38                                                 | 1.45                                                            | 1.46                                                   | 1.32                                                     | 1.23                                                  | 1.43                                                 |
| ENSG00000138496 | PARP9     | poly (ADP-ribose) polymerase family, member 9 [Source:HGNC Symbol;Acc:24118]             | 0.59                                                 | 1.11                                                            | 1.31                                                   | 2.42                                                     | 0.67                                                  | 0.99                                                 |
| ENSG00000115415 | STAT1     | signal transducer and activator of transcription 1, 91kDa [Source:HGNC Symbol;Acc:11362] | 1.15                                                 | 1.05                                                            | 1.04                                                   | 0.94                                                     | 0.66                                                  | 1.00                                                 |

**Table A57:** Genes significantly differentially expressed in all six cell types (RNA-Seq, Day 1)

| Cluster ID | Cluster Size | Gene ID         | Gene Name | Gene Description                                                                         | Log FC |
|------------|--------------|-----------------|-----------|------------------------------------------------------------------------------------------|--------|
| CBCLD1-001 | 4            | ENSG00000117228 | GBP1      | guanylate binding protein 1, interferon-inducible [Source:HGNC Symbol;Acc:4182]          | 1.33   |
| CBCLD1-001 | 4            | ENSG00000162645 | GBP2      | guanylate binding protein 2, interferon-inducible [Source:HGNC Symbol;Acc:4183]          | 1.20   |
| CBCLD1-001 | 4            | ENSG00000162654 | GBP4      | guanylate binding protein 4 [Source:HGNC Symbol;Acc:20480]                               | 1.05   |
| CBCLD1-001 | 4            | ENSG00000115415 | STAT1     | signal transducer and activator of transcription 1, 91kDa [Source:HGNC Symbol;Acc:11362] | 1.38   |

**Table A58:** Significant gene clusters (RNA-Seq, B-cells, Day 1)

| Cluster ID    | Cluster Size | Gene ID         | Gene Name | Gene Description                                                                |
|---------------|--------------|-----------------|-----------|---------------------------------------------------------------------------------|
| CBCLD1D28-001 | 5            | ENSG00000117228 | GBP1      | guanylate binding protein 1, interferon-inducible [Source:HGNC Symbol;Acc:4182] |

| Cluster ID    | Cluster Size | Gene ID         | Gene Name | Gene Description                                                                         |
|---------------|--------------|-----------------|-----------|------------------------------------------------------------------------------------------|
| CBCLD1D28-001 | 5            | ENSG00000162645 | GBP2      | guanylate binding protein 2, interferon-inducible [Source:HGNC Symbol;Acc:4183]          |
| CBCLD1D28-001 | 5            | ENSG00000162654 | GBP4      | guanylate binding protein 4 [Source:HGNC Symbol;Acc:20480]                               |
| CBCLD1D28-001 | 5            | ENSG00000154451 | GBP5      | guanylate binding protein 5 [Source:HGNC Symbol;Acc:19895]                               |
| CBCLD1D28-001 | 5            | ENSG00000115415 | STAT1     | signal transducer and activator of transcription 1, 91kDa [Source:HGNC Symbol;Acc:11362] |

**Table A59:** Significant gene clusters (RNA-Seq, B-cells, Day 1-28)

| Cluster ID | Cluster Size | Gene ID         | Gene Name | Gene Description                                                                                               | Log FC |
|------------|--------------|-----------------|-----------|----------------------------------------------------------------------------------------------------------------|--------|
| CDNCD1-001 | 2            | ENSG00000117228 | GBP1      | guanylate binding protein 1, interferon-inducible [Source:HGNC Symbol;Acc:4182]                                | 1.86   |
| CDNCD1-001 | 2            | ENSG00000138496 | PARP9     | poly (ADP-ribose) polymerase family, member 9 [Source:HGNC Symbol;Acc:24118]                                   | 1.06   |
| CDNCD1-002 | 2            | ENSG00000158517 | NCF1      | neutrophil cytosolic factor 1 [Source:HGNC Symbol;Acc:7660]                                                    | 0.96   |
| CDNCD1-002 | 2            | ENSG00000165178 | NCF1C     | neutrophil cytosolic factor 1C pseudogene [Source:HGNC Symbol;Acc:32523]                                       | 0.94   |
| CDNCD1-003 | 7            | ENSG00000133106 | EPSTI1    | epithelial stromal interaction 1 (breast) [Source:HGNC Symbol;Acc:16465]                                       | 1.11   |
| CDNCD1-003 | 7            | ENSG00000108679 | LGALS3BP  | lectin, galactoside-binding, soluble, 3 binding protein [Source:HGNC Symbol;Acc:6564]                          | 1.12   |
| CDNCD1-003 | 7            | ENSG00000100911 | PSME2     | proteasome (prosome, macropain) activator subunit 2 (PA28 beta) [Source:HGNC Symbol;Acc:9569]                  | 0.87   |
| CDNCD1-003 | 7            | ENSG00000177409 | SAMD9L    | sterile alpha motif domain containing 9-like [Source:HGNC Symbol;Acc:1349]                                     | 0.97   |
| CDNCD1-003 | 7            | ENSG00000149131 | SERPING1  | serpin peptidase inhibitor, clade G (C1 inhibitor), member 1 [Source:HGNC Symbol;Acc:1228]                     | 2.16   |
| CDNCD1-003 | 7            | ENSG00000115415 | STAT1     | signal transducer and activator of transcription 1, 91kDa [Source:HGNC Symbol;Acc:11362]                       | 1.45   |
| CDNCD1-003 | 7            | ENSG00000132530 | XAF1      | XIAP associated factor 1 [Source:HGNC Symbol;Acc:30932]                                                        | 0.66   |
| CDNCD1-004 | 2            | ENSG00000166278 | C2        | complement component 2 [Source:HGNC Symbol;Acc:1248]                                                           | 0.91   |
| CDNCD1-004 | 2            | ENSG00000026751 | SLAMF7    | SLAM family member 7 [Source:HGNC Symbol;Acc:21394]                                                            | 0.85   |
| CDNCD1-005 | 2            | ENSG00000163823 | CCR1      | chemokine (C-C motif) receptor 1 [Source:HGNC Symbol;Acc:1602]                                                 | 0.61   |
| CDNCD1-005 | 2            | ENSG00000198959 | TGM2      | transglutaminase 2 (C polypeptide, protein-glutamine-gamma-glutamyltransferase) [Source:HGNC Symbol;Acc:11778] | 1.40   |
| CDNCD1-006 | 2            | ENSG00000115594 | IL1R1     | interleukin 1 receptor, type I [Source:HGNC Symbol;Acc:5993]                                                   | -0.63  |
| CDNCD1-006 | 2            | ENSG00000115590 | IL1R2     | interleukin 1 receptor, type II [Source:HGNC Symbol;Acc:5994]                                                  | -0.71  |
| CDNCD1-007 | 3            | ENSG00000173369 | C1QB      | complement component 1, q subcomponent, B chain [Source:HGNC Symbol;Acc:1242]                                  | 1.16   |
| CDNCD1-007 | 3            | ENSG00000229754 | CXCR2P1   | chemokine (C-X-C motif) receptor 2 pseudogene 1 [Source:HGNC Symbol;Acc:6028]                                  | 0.82   |

| Cluster ID | Cluster Size | Gene ID         | Gene Name | Gene Description                                                                                               | Log FC |
|------------|--------------|-----------------|-----------|----------------------------------------------------------------------------------------------------------------|--------|
| CDNCD1-007 | 3            | ENSG00000111181 | SLC6A12   | solute carrier family 6 (neurotransmitter transporter, betaine/GABA), member 12 [Source:HGNC Symbol;Acc:11045] | 0.62   |

**Table A60:** Significant gene clusters (RNA-Seq, Dendritic cells, Day 1)

| Cluster ID    | Cluster Size | Gene ID         | Gene Name | Gene Description                                                                                   |
|---------------|--------------|-----------------|-----------|----------------------------------------------------------------------------------------------------|
| CDNCD1D28-001 | 2            | ENSG00000162645 | GBP2      | guanylate binding protein 2, interferon-inducible [Source:HGNC Symbol;Acc:4183]                    |
| CDNCD1D28-001 | 2            | ENSG00000140105 | WARS      | tryptophanyl-tRNA synthetase [Source:HGNC Symbol;Acc:12729]                                        |
| CDNCD1D28-002 | 2            | ENSG00000162654 | GBP4      | guanylate binding protein 4 [Source:HGNC Symbol;Acc:20480]                                         |
| CDNCD1D28-002 | 2            | ENSG00000154451 | GBP5      | guanylate binding protein 5 [Source:HGNC Symbol;Acc:19895]                                         |
| CDNCD1D28-003 | 2            | ENSG00000158517 | NCF1      | neutrophil cytosolic factor 1 [Source:HGNC Symbol;Acc:7660]                                        |
| CDNCD1D28-003 | 2            | ENSG00000165178 | NCF1C     | neutrophil cytosolic factor 1C pseudogene [Source:HGNC Symbol;Acc:32523]                           |
| CDNCD1D28-004 | 2            | ENSG00000115594 | IL1R1     | interleukin 1 receptor, type I [Source:HGNC Symbol;Acc:5993]                                       |
| CDNCD1D28-004 | 2            | ENSG00000115590 | IL1R2     | interleukin 1 receptor, type II [Source:HGNC Symbol;Acc:5994]                                      |
| CDNCD1D28-005 | 2            | ENSG00000059804 | SLC2A3    | solute carrier family 2 (facilitated glucose transporter), member 3 [Source:HGNC Symbol;Acc:11007] |
| CDNCD1D28-005 | 2            | ENSG00000184557 | SOCS3     | suppressor of cytokine signaling 3 [Source:HGNC Symbol;Acc:19391]                                  |
| CDNCD1D28-006 | 2            | ENSG00000171695 | C20orf201 | chromosome 20 open reading frame 201 [Source:HGNC Symbol;Acc:33718]                                |
| CDNCD1D28-006 | 2            | ENSG00000245848 | CEBPA     | CCAAT/enhancer binding protein (C/EBP), alpha [Source:HGNC Symbol;Acc:1833]                        |

**Table A61:** Significant gene clusters (RNA-Seq, Dendritic cells, Day 1-28)

| Cluster ID | Cluster Size | Gene ID         | Gene Name | Gene Description                                                                                                        | Log FC |
|------------|--------------|-----------------|-----------|-------------------------------------------------------------------------------------------------------------------------|--------|
| CMNCD1-001 | 6            | ENSG00000168062 | BATF2     | basic leucine zipper transcription factor, ATF-like 2 [Source:HGNC Symbol;Acc:25163]                                    | 2.15   |
| CMNCD1-001 | 6            | ENSG00000055130 | CUL1      | cullin 1 [Source:HGNC Symbol;Acc:2551]                                                                                  | 0.96   |
| CMNCD1-001 | 6            | ENSG00000133106 | EPSTI1    | epithelial stromal interaction 1 (breast) [Source:HGNC Symbol;Acc:16465]                                                | 1.31   |
| CMNCD1-001 | 6            | ENSG00000240065 | PSMB9     | proteasome (prosome, macropain) subunit, beta type, 9 (large multifunctional peptidase 2) [Source:HGNC Symbol;Acc:9546] | 0.84   |
| CMNCD1-001 | 6            | ENSG00000149131 | SERPING1  | serpin peptidase inhibitor, clade G (C1 inhibitor), member 1 [Source:HGNC Symbol;Acc:1228]                              | 2.32   |
| CMNCD1-001 | 6            | ENSG00000156587 | UBE2L6    | ubiquitin-conjugating enzyme E2L 6 [Source:HGNC Symbol;Acc:12490]                                                       | 1.02   |
| CMNCD1-002 | 2            | ENSG00000244682 | FCGR2C    | Fc fragment of IgG, low affinity IIc, receptor for (CD32) (gene/pseudogene) [Source:HGNC Symbol;Acc:15626]              | 0.60   |

| Cluster ID | Cluster Size | Gene ID         | Gene Name     | Gene Description                                                                                                 | Log FC |
|------------|--------------|-----------------|---------------|------------------------------------------------------------------------------------------------------------------|--------|
| CMNCD1-002 | 2            | ENSG00000225217 | HSPA7         | heat shock 70kDa protein 7 (HSP70B) [Source:HGNC Symbol;Acc:5240]                                                | 0.62   |
| CMNCD1-003 | 5            | ENSG00000137965 | IFI44         | interferon-induced protein 44 [Source:HGNC Symbol;Acc:16938]                                                     | 0.76   |
| CMNCD1-003 | 5            | ENSG00000137959 | IFI44L        | interferon-induced protein 44-like [Source:HGNC Symbol;Acc:17817]                                                | 0.90   |
| CMNCD1-003 | 5            | ENSG00000157601 | MX1           | myxovirus (influenza virus) resistance 1, interferon-inducible protein p78 (mouse) [Source:HGNC Symbol;Acc:7532] | 0.64   |
| CMNCD1-003 | 5            | ENSG00000111335 | OAS2          | 2'-5'-oligoadenylate synthetase 2, 69/71kDa [Source:HGNC Symbol;Acc:8087]                                        | 0.71   |
| CMNCD1-003 | 5            | ENSG00000111331 | OAS3          | 2'-5'-oligoadenylate synthetase 3, 100kDa [Source:HGNC Symbol;Acc:8088]                                          | 0.74   |
| CMNCD1-004 | 2            | ENSG00000101017 | CD40          | CD40 molecule, TNF receptor superfamily member 5 [Source:HGNC Symbol;Acc:11919]                                  | 1.05   |
| CMNCD1-004 | 2            | ENSG00000135114 | OASL          | 2'-5'-oligoadenylate synthetase-like [Source:HGNC Symbol;Acc:8090]                                               | 0.72   |
| CMNCD1-005 | 10           | ENSG00000117228 | GBP1          | guanylate binding protein 1, interferon-inducible [Source:HGNC Symbol;Acc:4182]                                  | 2.67   |
| CMNCD1-005 | 10           | ENSG00000225492 | GBP1P1        | guanylate binding protein 1, interferon-inducible pseudogene 1 [Source:HGNC Symbol;Acc:39561]                    | 3.52   |
| CMNCD1-005 | 10           | ENSG00000162645 | GBP2          | guanylate binding protein 2, interferon-inducible [Source:HGNC Symbol;Acc:4183]                                  | 1.65   |
| CMNCD1-005 | 10           | ENSG00000117226 | GBP3          | guanylate binding protein 3 [Source:HGNC Symbol;Acc:4184]                                                        | 1.17   |
| CMNCD1-005 | 10           | ENSG00000162654 | GBP4          | guanylate binding protein 4 [Source:HGNC Symbol;Acc:20480]                                                       | 2.19   |
| CMNCD1-005 | 10           | ENSG00000154451 | GBP5          | guanylate binding protein 5 [Source:HGNC Symbol;Acc:19895]                                                       | 3.00   |
| CMNCD1-005 | 10           | ENSG00000183762 | KREMEN1       | kringle containing transmembrane protein 1 [Source:HGNC Symbol;Acc:17550]                                        | 1.95   |
| CMNCD1-005 | 10           | ENSG00000002549 | LAP3          | leucine aminopeptidase 3 [Source:HGNC Symbol;Acc:18449]                                                          | 1.44   |
| CMNCD1-005 | 10           | ENSG00000138496 | PARP9         | poly (ADP-ribose) polymerase family, member 9 [Source:HGNC Symbol;Acc:24118]                                     | 1.14   |
| CMNCD1-005 | 10           | ENSG00000115415 | STAT1         | signal transducer and activator of transcription 1, 91kDa [Source:HGNC Symbol;Acc:11362]                         | 1.46   |
| CMNCD1-006 | 3            | ENSG00000125347 | IRF1          | interferon regulatory factor 1 [Source:HGNC Symbol;Acc:6116]                                                     | 1.04   |
| CMNCD1-006 | 3            | ENSG00000140853 | NLRC5         | NLR family, CARD domain containing 5 [Source:HGNC Symbol;Acc:29933]                                              | 0.77   |
| CMNCD1-006 | 3            | ENSG00000233029 | RP11-439A17.9 |                                                                                                                  | 2.03   |
| CMNCD1-007 | 3            | ENSG00000164308 | ERAP2         | endoplasmic reticulum aminopeptidase 2 [Source:HGNC Symbol;Acc:29499]                                            | 0.62   |
| CMNCD1-007 | 3            | ENSG00000115392 | FANCL         | Fanconi anemia, complementation group L [Source:HGNC Symbol;Acc:20748]                                           | 0.65   |
| CMNCD1-007 | 3            | ENSG00000136231 | IGF2BP3       | insulin-like growth factor 2 mRNA binding protein 3 [Source:HGNC Symbol;Acc:28868]                               | 1.35   |
| CMNCD1-008 | 5            | ENSG00000169136 | ATF5          | activating transcription factor 5 [Source:HGNC Symbol;Acc:790]                                                   | 0.59   |
| CMNCD1-008 | 5            | ENSG00000138119 | MYOF          | myoferlin [Source:HGNC Symbol;Acc:3656]                                                                          | 0.97   |

| Cluster ID | Cluster Size | Gene ID         | Gene Name  | Gene Description                                                                                               | Log FC |
|------------|--------------|-----------------|------------|----------------------------------------------------------------------------------------------------------------|--------|
| CMNCD1-008 | 5            | ENSG00000145287 | PLAC8      | placenta-specific 8 [Source:HGNC Symbol;Acc:19254]                                                             | 1.11   |
| CMNCD1-008 | 5            | ENSG00000100911 | PSME2      | proteasome (prosome, macropain) activator subunit 2 (PA28 beta) [Source:HGNC Symbol;Acc:9569]                  | 0.97   |
| CMNCD1-008 | 5            | ENSG00000026751 | SLAMF7     | SLAM family member 7 [Source:HGNC Symbol;Acc:21394]                                                            | 2.01   |
| CMNCD1-009 | 4            | ENSG00000198087 | CD2AP      | CD2-associated protein [Source:HGNC Symbol;Acc:14258]                                                          | 0.59   |
| CMNCD1-009 | 4            | ENSG00000134326 | CMPK2      | cytidine monophosphate (UMP-CMP) kinase 2, mitochondrial [Source:HGNC Symbol;Acc:27015]                        | 0.74   |
| CMNCD1-009 | 4            | ENSG00000137628 | DDX60      | DEAD (Asp-Glu-Ala-Asp) box polypeptide 60 [Source:HGNC Symbol;Acc:25942]                                       | 0.91   |
| CMNCD1-009 | 4            | ENSG00000111181 | SLC6A12    | solute carrier family 6 (neurotransmitter transporter, betaine/GABA), member 12 [Source:HGNC Symbol;Acc:11045] | 0.88   |
| CMNCD1-010 | 6            | ENSG00000145349 | CAMK2D     | calcium/calmodulin-dependent protein kinase II delta [Source:HGNC Symbol;Acc:1462]                             | 0.69   |
| CMNCD1-010 | 6            | ENSG00000172159 | FRMD3      | FERM domain containing 3 [Source:HGNC Symbol;Acc:24125]                                                        | 0.85   |
| CMNCD1-010 | 6            | ENSG00000138646 | HERC5      | hect domain and RLD 5 [Source:HGNC Symbol;Acc:24368]                                                           | 0.94   |
| CMNCD1-010 | 6            | ENSG00000158517 | NCF1       | neutrophil cytosolic factor 1 [Source:HGNC Symbol;Acc:7660]                                                    | 0.62   |
| CMNCD1-010 | 6            | ENSG00000165178 | NCF1C      | neutrophil cytosolic factor 1C pseudogene [Source:HGNC Symbol;Acc:32523]                                       | 0.64   |
| CMNCD1-010 | 6            | ENSG00000124256 | ZBP1       | Z-DNA binding protein 1 [Source:HGNC Symbol;Acc:16176]                                                         | 0.81   |
| CMNCD1-011 | 2            | ENSG00000108691 | CCL2       | chemokine (C-C motif) ligand 2 [Source:HGNC Symbol;Acc:10618]                                                  | 1.03   |
| CMNCD1-011 | 2            | ENSG00000171621 | SPSB1      | splA/ryanodine receptor domain and SOCS box containing 1 [Source:HGNC Symbol;Acc:30628]                        | 0.62   |
| CMNCD1-012 | 2            | ENSG00000226321 | AC104809.3 |                                                                                                                | -0.93  |
| CMNCD1-012 | 2            | ENSG00000233392 | AC104809.4 |                                                                                                                | -0.95  |
| CMNCD1-013 | 6            | ENSG00000197381 | ADARB1     | adenosine deaminase, RNA-specific, B1 [Source:HGNC Symbol;Acc:226]                                             | 0.87   |
| CMNCD1-013 | 6            | ENSG00000103569 | AQP9       | aquaporin 9 [Source:HGNC Symbol;Acc:643]                                                                       | 0.82   |
| CMNCD1-013 | 6            | ENSG00000150347 | ARID5B     | AT rich interactive domain 5B (MRF1-like) [Source:HGNC Symbol;Acc:17362]                                       | 1.28   |
| CMNCD1-013 | 6            | ENSG00000257017 | HP         | haptoglobin [Source:HGNC Symbol;Acc:5141]                                                                      | 0.81   |
| CMNCD1-013 | 6            | ENSG00000105639 | JAK3       | Janus kinase 3 [Source:HGNC Symbol;Acc:6193]                                                                   | 0.72   |
| CMNCD1-013 | 6            | ENSG00000184557 | SOCS3      | suppressor of cytokine signaling 3 [Source:HGNC Symbol;Acc:19391]                                              | 1.31   |
| CMNCD1-014 | 2            | ENSG00000239899 | AC011994.1 |                                                                                                                | 1.21   |
| CMNCD1-014 | 2            | ENSG00000244642 | AP005717.1 |                                                                                                                | 1.11   |
| CMNCD1-015 | 2            | ENSG00000256579 | AC135776.2 |                                                                                                                | 0.69   |
| CMNCD1-015 | 2            | ENSG00000122420 | PTGFR      | prostaglandin F receptor (FP) [Source:HGNC Symbol;Acc:9600]                                                    | 0.61   |
| CMNCD1-016 | 2            | ENSG00000148926 | ADM        | adrenomedullin [Source:HGNC Symbol;Acc:259]                                                                    | 0.84   |
| CMNCD1-016 | 2            | ENSG00000167680 | SEMA6B     | sema domain, transmembrane domain (TM), and cytoplasmic domain, (semaphorin) 6B [Source:HGNC Symbol;Acc:10739] | 0.81   |

Table A62: Significant gene clusters (RNA-Seq, Monocytes, Day 1)

| Cluster ID    | Cluster Size | Gene ID         | Gene Name  | Gene Description                                                                                   |
|---------------|--------------|-----------------|------------|----------------------------------------------------------------------------------------------------|
| CMNCD1D28-001 | 2            | ENSG00000119922 | IFIT2      | interferon-induced protein with tetratricopeptide repeats 2 [Source:HGNC Symbol;Acc:5409]          |
| CMNCD1D28-001 | 2            | ENSG00000119917 | IFIT3      | interferon-induced protein with tetratricopeptide repeats 3 [Source:HGNC Symbol;Acc:5411]          |
| CMNCD1D28-002 | 2            | ENSG00000137965 | IFI44      | interferon-induced protein 44 [Source:HGNC Symbol;Acc:16938]                                       |
| CMNCD1D28-002 | 2            | ENSG00000137959 | IFI44L     | interferon-induced protein 44-like [Source:HGNC Symbol;Acc:17817]                                  |
| CMNCD1D28-003 | 2            | ENSG00000158517 | NCF1       | neutrophil cytosolic factor 1 [Source:HGNC Symbol;Acc:7660]                                        |
| CMNCD1D28-003 | 2            | ENSG00000165178 | NCF1C      | neutrophil cytosolic factor 1C pseudogene [Source:HGNC Symbol;Acc:32523]                           |
| CMNCD1D28-004 | 2            | ENSG00000150337 | FCGR1A     | Fc fragment of IgG, high affinity Ia, receptor (CD64) [Source:HGNC Symbol;Acc:3613]                |
| CMNCD1D28-004 | 2            | ENSG00000198019 | FCGR1B     | Fc fragment of IgG, high affinity Ib, receptor (CD64) [Source:HGNC Symbol;Acc:3614]                |
| CMNCD1D28-005 | 3            | ENSG00000177989 | ODF3B      | outer dense fiber of sperm tails 3B [Source:HGNC Symbol;Acc:34388]                                 |
| CMNCD1D28-005 | 3            | ENSG00000130489 | SCO2       | SCO cytochrome oxidase deficient homolog 2 (yeast) [Source:HGNC Symbol;Acc:10604]                  |
| CMNCD1D28-005 | 3            | ENSG00000025708 | TYMP       | thymidine phosphorylase [Source:HGNC Symbol;Acc:3148]                                              |
| CMNCD1D28-006 | 2            | ENSG00000221963 | APOL6      | apolipoprotein L, 6 [Source:HGNC Symbol;Acc:14870]                                                 |
| CMNCD1D28-006 | 2            | ENSG00000173821 | RNF213     | ring finger protein 213 [Source:HGNC Symbol;Acc:14539]                                             |
| CMNCD1D28-007 | 2            | ENSG00000226321 | AC104809.3 |                                                                                                    |
| CMNCD1D28-007 | 2            | ENSG00000233392 | AC104809.4 |                                                                                                    |
| CMNCD1D28-008 | 2            | ENSG00000164308 | ERAP2      | endoplasmic reticulum aminopeptidase 2 [Source:HGNC Symbol;Acc:29499]                              |
| CMNCD1D28-008 | 2            | ENSG00000115419 | GLS        | glutaminase [Source:HGNC Symbol;Acc:4331]                                                          |
| CMNCD1D28-009 | 2            | ENSG00000239899 | AC011994.1 |                                                                                                    |
| CMNCD1D28-009 | 2            | ENSG00000244642 | AP005717.1 |                                                                                                    |
| CMNCD1D28-010 | 11           | ENSG00000144218 | AFF3       | AF4/FMR2 family, member 3 [Source:HGNC Symbol;Acc:6473]                                            |
| CMNCD1D28-010 | 11           | ENSG00000172232 | AZU1       | azurocidin 1 [Source:HGNC Symbol;Acc:913]                                                          |
| CMNCD1D28-010 | 11           | ENSG00000116824 | CD2        | CD2 molecule [Source:HGNC Symbol;Acc:1639]                                                         |
| CMNCD1D28-010 | 11           | ENSG00000049089 | COL9A2     | collagen, type IX, alpha 2 [Source:HGNC Symbol;Acc:2218]                                           |
| CMNCD1D28-010 | 11           | ENSG00000179639 | FCER1A     | Fc fragment of IgE, high affinity I, receptor for; alpha polypeptide [Source:HGNC Symbol;Acc:3609] |
| CMNCD1D28-010 | 11           | ENSG00000213366 | GSTM2      | glutathione S-transferase mu 2 (muscle) [Source:HGNC Symbol;Acc:4634]                              |
| CMNCD1D28-010 | 11           | ENSG00000104814 | MAP4K1     | mitogen-activated protein kinase kinase kinase kinase 1 [Source:HGNC Symbol;Acc:6863]              |
| CMNCD1D28-010 | 11           | ENSG00000165795 | NDRG2      | NDRG family member 2 [Source:HGNC Symbol;Acc:14460]                                                |
| CMNCD1D28-010 | 11           | ENSG00000166428 | PLD4       | phospholipase D family, member 4 [Source:HGNC Symbol;Acc:23792]                                    |
| CMNCD1D28-010 | 11           | ENSG00000103485 | QPRT       | quinolinate phosphoribosyltransferase [Source:HGNC Symbol;Acc:9755]                                |
| CMNCD1D28-010 | 11           | ENSG00000182557 | SPNS3      | spinster homolog 3 (Drosophila) [Source:HGNC Symbol;Acc:28433]                                     |
| CMNCD1D28-011 | 9            | ENSG00000138031 | ADCY3      | adenylate cyclase 3 [Source:HGNC Symbol;Acc:234]                                                   |
| CMNCD1D28-011 | 9            | ENSG00000137757 | CASP5      | caspase 5, apoptosis-related cysteine peptidase [Source:HGNC Symbol;Acc:1506]                      |
| CMNCD1D28-011 | 9            | ENSG00000243649 | CFB        | complement factor B [Source:HGNC Symbol;Acc:1037]                                                  |

| Cluster ID    | Cluster Size | Gene ID         | Gene Name | Gene Description                                                                                                       |
|---------------|--------------|-----------------|-----------|------------------------------------------------------------------------------------------------------------------------|
| CMNCD1D28-011 | 9            | ENSG00000120885 | CLU       | clusterin [Source:HGNC Symbol;Acc:2095]                                                                                |
| CMNCD1D28-011 | 9            | ENSG00000108950 | FAM20A    | family with sequence similarity 20, member A [Source:HGNC Symbol;Acc:23015]                                            |
| CMNCD1D28-011 | 9            | ENSG00000183087 | GAS6      | growth arrest-specific 6 [Source:HGNC Symbol;Acc:4168]                                                                 |
| CMNCD1D28-011 | 9            | ENSG00000173110 | HSPA6     | heat shock 70kDa protein 6 (HSP70B') [Source:HGNC Symbol;Acc:5239]                                                     |
| CMNCD1D28-011 | 9            | ENSG00000105639 | JAK3      | Janus kinase 3 [Source:HGNC Symbol;Acc:6193]                                                                           |
| CMNCD1D28-011 | 9            | ENSG00000104972 | LILRB1    | leukocyte immunoglobulin-like receptor, subfamily B (with TM and ITIM domains), member 1 [Source:HGNC Symbol;Acc:6605] |
| CMNCD1D28-012 | 7            | ENSG00000151726 | ACSL1     | acyl-CoA synthetase long-chain family member 1 [Source:HGNC Symbol;Acc:3569]                                           |
| CMNCD1D28-012 | 7            | ENSG00000103569 | AQP9      | aquaporin 9 [Source:HGNC Symbol;Acc:643]                                                                               |
| CMNCD1D28-012 | 7            | ENSG00000150347 | ARID5B    | AT rich interactive domain 5B (MRF1-like) [Source:HGNC Symbol;Acc:17362]                                               |
| CMNCD1D28-012 | 7            | ENSG00000140379 | BCL2A1    | BCL2-related protein A1 [Source:HGNC Symbol;Acc:991]                                                                   |
| CMNCD1D28-012 | 7            | ENSG00000242616 | GNG10     | guanine nucleotide binding protein (G protein), gamma 10 [Source:HGNC Symbol;Acc:4402]                                 |
| CMNCD1D28-012 | 7            | ENSG00000257017 | HP        | haptoglobin [Source:HGNC Symbol;Acc:5141]                                                                              |
| CMNCD1D28-012 | 7            | ENSG00000184557 | SOCS3     | suppressor of cytokine signaling 3 [Source:HGNC Symbol;Acc:19391]                                                      |

**Table A63:** Significant gene clusters (RNA-Seq, Monocytes, Day 1-28)

| Cluster ID | Cluster Size | Gene ID         | Gene Name | Gene Description                                                                               | Log FC |
|------------|--------------|-----------------|-----------|------------------------------------------------------------------------------------------------|--------|
| CNEUD1-001 | 2            | ENSG00000070501 | POLB      | polymerase (DNA directed), beta [Source:HGNC Symbol;Acc:9174]                                  | 0.65   |
| CNEUD1-001 | 2            | ENSG00000204267 | TAP2      | transporter 2, ATP-binding cassette, sub-family B (MDR/TAP) [Source:HGNC Symbol;Acc:44]        | 0.91   |
| CNEUD1-002 | 2            | ENSG00000134326 | CMPK2     | cytidine monophosphate (UMP-CMP) kinase 2, mitochondrial [Source:HGNC Symbol;Acc:27015]        | 1.79   |
| CNEUD1-002 | 2            | ENSG00000119917 | IFIT3     | interferon-induced protein with tetratricopeptide repeats 3 [Source:HGNC Symbol;Acc:5411]      | 1.22   |
| CNEUD1-003 | 2            | ENSG00000092010 | PSME1     | proteasome (prosome, macropain) activator subunit 1 (PA28 alpha) [Source:HGNC Symbol;Acc:9568] | 0.70   |
| CNEUD1-003 | 2            | ENSG00000034510 | TMSB10    | thymosin beta 10 [Source:HGNC Symbol;Acc:11879]                                                | 1.08   |
| CNEUD1-004 | 2            | ENSG00000137200 | FTSJ2     | FtsJ methyltransferase domain containing 2 [Source:HGNC Symbol;Acc:21077]                      | 1.09   |
| CNEUD1-004 | 2            | ENSG00000059378 | PARP12    | poly (ADP-ribose) polymerase family, member 12 [Source:HGNC Symbol;Acc:21919]                  | 0.87   |
| CNEUD1-005 | 2            | ENSG00000099860 | GADD45B   | growth arrest and DNA-damage-inducible, beta [Source:HGNC Symbol;Acc:4096]                     | 0.94   |
| CNEUD1-005 | 2            | ENSG00000125347 | IRF1      | interferon regulatory factor 1 [Source:HGNC Symbol;Acc:6116]                                   | 0.94   |
| CNEUD1-006 | 2            | ENSG00000173239 | LIPM      | lipase, family member M [Source:HGNC Symbol;Acc:23455]                                         | 3.53   |
| CNEUD1-006 | 2            | ENSG00000135093 | USP30     | ubiquitin specific peptidase 30 [Source:HGNC Symbol;Acc:20065]                                 | 0.79   |
| CNEUD1-007 | 8            | ENSG00000138646 | HERC5     | hect domain and RLD 5 [Source:HGNC Symbol;Acc:24368]                                           | 1.00   |

| Cluster ID | Cluster Size | Gene ID         | Gene Name | Gene Description                                                                                                        | Log FC |
|------------|--------------|-----------------|-----------|-------------------------------------------------------------------------------------------------------------------------|--------|
| CNEUD1-007 | 8            | ENSG00000137965 | IFI44     | interferon-induced protein 44 [Source:HGNC Symbol;Acc:16938]                                                            | 1.58   |
| CNEUD1-007 | 8            | ENSG00000137959 | IFI44L    | interferon-induced protein 44-like [Source:HGNC Symbol;Acc:17817]                                                       | 1.69   |
| CNEUD1-007 | 8            | ENSG00000089127 | OAS1      | 2'-5'-oligoadenylate synthetase 1, 40/46kDa [Source:HGNC Symbol;Acc:8086]                                               | 2.02   |
| CNEUD1-007 | 8            | ENSG00000111335 | OAS2      | 2'-5'-oligoadenylate synthetase 2, 69/71kDa [Source:HGNC Symbol;Acc:8087]                                               | 1.97   |
| CNEUD1-007 | 8            | ENSG00000111331 | OAS3      | 2'-5'-oligoadenylate synthetase 3, 100kDa [Source:HGNC Symbol;Acc:8088]                                                 | 1.65   |
| CNEUD1-007 | 8            | ENSG00000134321 | RSAD2     | radical S-adenosyl methionine domain containing 2 [Source:HGNC Symbol;Acc:30908]                                        | 1.75   |
| CNEUD1-007 | 8            | ENSG00000141664 | ZCCHC2    | zinc finger, CCHC domain containing 2 [Source:HGNC Symbol;Acc:22916]                                                    | 0.63   |
| CNEUD1-008 | 4            | ENSG00000130303 | BST2      | bone marrow stromal cell antigen 2 [Source:HGNC Symbol;Acc:1119]                                                        | 1.35   |
| CNEUD1-008 | 4            | ENSG00000104518 | GSDMD     | gasdermin D [Source:HGNC Symbol;Acc:25697]                                                                              | 0.63   |
| CNEUD1-008 | 4            | ENSG00000185507 | IRF7      | interferon regulatory factor 7 [Source:HGNC Symbol;Acc:6122]                                                            | 0.91   |
| CNEUD1-008 | 4            | ENSG00000240065 | PSMB9     | proteasome (prosome, macropain) subunit, beta type, 9 (large multifunctional peptidase 2) [Source:HGNC Symbol;Acc:9546] | 0.79   |
| CNEUD1-009 | 2            | ENSG00000138772 | ANXA3     | annexin A3 [Source:HGNC Symbol;Acc:541]                                                                                 | 0.69   |
| CNEUD1-009 | 2            | ENSG00000187554 | TLR5      | toll-like receptor 5 [Source:HGNC Symbol;Acc:11851]                                                                     | 0.65   |
| CNEUD1-010 | 3            | ENSG00000137757 | CASP5     | caspase 5, apoptosis-related cysteine peptidase [Source:HGNC Symbol;Acc:1506]                                           | 1.08   |
| CNEUD1-010 | 3            | ENSG00000163565 | IFI16     | interferon, gamma-inducible protein 16 [Source:HGNC Symbol;Acc:5395]                                                    | 1.01   |
| CNEUD1-010 | 3            | ENSG00000157551 | KCNJ15    | potassium inwardly-rectifying channel, subfamily J, member 15 [Source:HGNC Symbol;Acc:6261]                             | 0.70   |
| CNEUD1-011 | 5            | ENSG00000075399 | C16orf7   | chromosome 16 open reading frame 7 [Source:HGNC Symbol;Acc:13526]                                                       | 1.27   |
| CNEUD1-011 | 5            | ENSG00000197448 | GSTK1     | glutathione S-transferase kappa 1 [Source:HGNC Symbol;Acc:16906]                                                        | 1.00   |
| CNEUD1-011 | 5            | ENSG00000158411 | MITD1     | MIT, microtubule interacting and transport, domain containing 1 [Source:HGNC Symbol;Acc:25207]                          | 0.67   |
| CNEUD1-011 | 5            | ENSG00000141574 | SECTM1    | secreted and transmembrane 1 [Source:HGNC Symbol;Acc:10707]                                                             | 0.99   |
| CNEUD1-011 | 5            | ENSG00000145365 | TIFA      | TRAF-interacting protein with forkhead-associated domain [Source:HGNC Symbol;Acc:19075]                                 | 1.05   |
| CNEUD1-012 | 2            | ENSG00000119950 | MXI1      | MAX interactor 1 [Source:HGNC Symbol;Acc:7534]                                                                          | -0.66  |
| CNEUD1-012 | 2            | ENSG00000185989 | RASA3     | RAS p21 protein activator 3 [Source:HGNC Symbol;Acc:20331]                                                              | -0.71  |
| CNEUD1-013 | 2            | ENSG00000205730 | ITPRIPL2  | inositol 1,4,5-trisphosphate receptor interacting protein-like 2 [Source:HGNC Symbol;Acc:27257]                         | 2.30   |
| CNEUD1-013 | 2            | ENSG00000067221 | STOML1    | stomatatin (EPB72)-like 1 [Source:HGNC Symbol;Acc:14560]                                                                | 1.62   |
| CNEUD1-014 | 4            | ENSG00000166002 | C11orf75  | chromosome 11 open reading frame 75 [Source:HGNC Symbol;Acc:24810]                                                      | 1.11   |
| CNEUD1-014 | 4            | ENSG00000085063 | CD59      | CD59 molecule, complement regulatory protein [Source:HGNC Symbol;Acc:1689]                                              | 0.78   |



| Cluster ID | Cluster Size | Gene ID         | Gene Name     | Gene Description                                                                                     | Log FC |
|------------|--------------|-----------------|---------------|------------------------------------------------------------------------------------------------------|--------|
| CNEUD1-014 | 4            | ENSG00000203666 | EFCAB2        | EF-hand calcium binding domain 2 [Source:HGNC Symbol;Acc:28166]                                      | 1.17   |
| CNEUD1-014 | 4            | ENSG00000170542 | SERPINB9      | serpin peptidase inhibitor, clade B (ovalbumin), member 9 [Source:HGNC Symbol;Acc:8955]              | 1.22   |
| CNEUD1-015 | 3            | ENSG00000114770 | ABCC5         | ATP-binding cassette, sub-family C (CFTR/MRP), member 5 [Source:HGNC Symbol;Acc:56]                  | -0.69  |
| CNEUD1-015 | 3            | ENSG00000058866 | DGKG          | diacylglycerol kinase, gamma 90kDa [Source:HGNC Symbol;Acc:2853]                                     | -0.72  |
| CNEUD1-015 | 3            | ENSG00000236345 | RP11-59D5_B.2 |                                                                                                      | -0.61  |
| CNEUD1-016 | 2            | ENSG00000154188 | ANGPT1        | angiopoietin 1 [Source:HGNC Symbol;Acc:484]                                                          | -0.77  |
| CNEUD1-016 | 2            | ENSG00000151136 | BTBD11        | BTB (POZ) domain containing 11 [Source:HGNC Symbol;Acc:23844]                                        | -0.62  |
| CNEUD1-017 | 3            | ENSG00000225131 | PSME2P2       | proteasome activator subunit 2 pseudogene 2 [Source:HGNC Symbol;Acc:30160]                           | 1.41   |
| CNEUD1-017 | 3            | ENSG00000138760 | SCARB2        | scavenger receptor class B, member 2 [Source:HGNC Symbol;Acc:1665]                                   |        |
| CNEUD1-017 | 3            | ENSG00000106785 | TRIM14        | tripartite motif containing 14 [Source:HGNC Symbol;Acc:16283]                                        |        |
| CNEUD1-018 | 6            | ENSG00000133313 | CNDP2         | CNDP dipeptidase 2 (metallopeptidase M20 family) [Source:HGNC Symbol;Acc:24437]                      | 1.09   |
| CNEUD1-018 | 6            | ENSG00000002549 | LAP3          | leucine aminopeptidase 3 [Source:HGNC Symbol;Acc:18449]                                              | 1.76   |
| CNEUD1-018 | 6            | ENSG00000135362 | PRR5L         | proline rich 5 like [Source:HGNC Symbol;Acc:25878]                                                   | 0.98   |
| CNEUD1-018 | 6            | ENSG00000100401 | RANGAP1       | Ran GTPase activating protein 1 [Source:HGNC Symbol;Acc:9854]                                        | 1.09   |
| CNEUD1-018 | 6            | ENSG00000104312 | RIPK2         | receptor-interacting serine-threonine kinase 2 [Source:HGNC Symbol;Acc:10020]                        | 0.91   |
| CNEUD1-018 | 6            | ENSG00000185338 | SOCS1         | suppressor of cytokine signaling 1 [Source:HGNC Symbol;Acc:19383]                                    | 2.20   |
| CNEUD1-019 | 2            | ENSG00000038210 | PI4K2B        | phosphatidylinositol 4-kinase type 2 beta [Source:HGNC Symbol;Acc:18215]                             | 0.74   |
| CNEUD1-019 | 2            | ENSG00000155366 | RHOC          | ras homolog gene family, member C [Source:HGNC Symbol;Acc:669]                                       | 1.12   |
| CNEUD1-020 | 2            | ENSG00000226012 | AP001434.2    |                                                                                                      | 0.64   |
| CNEUD1-020 | 2            | ENSG00000114541 | FRMD4B        | FERM domain containing 4B [Source:HGNC Symbol;Acc:24886]                                             | 0.82   |
| CNEUD1-021 | 4            | ENSG00000215068 | AC025171.1    |                                                                                                      | 0.81   |
| CNEUD1-021 | 4            | ENSG00000064601 | CTSA          | cathepsin A [Source:HGNC Symbol;Acc:9251]                                                            | 0.67   |
| CNEUD1-021 | 4            | ENSG00000100364 | KIAA0930      | KIAA0930 [Source:HGNC Symbol;Acc:1314]                                                               | 0.62   |
| CNEUD1-021 | 4            | ENSG00000240342 | RPS2P5        | ribosomal protein S2 pseudogene 5 [Source:HGNC Symbol;Acc:31386]                                     | 0.63   |
| CNEUD1-022 | 4            | ENSG00000030110 | BAK1          | BCL2-antagonist/killer 1 [Source:HGNC Symbol;Acc:949]                                                | 0.59   |
| CNEUD1-022 | 4            | ENSG00000179044 | EXOC3L1       | exocyst complex component 3-like 1 [Source:HGNC Symbol;Acc:27540]                                    | 1.27   |
| CNEUD1-022 | 4            | ENSG00000131203 | IDO1          | indoleamine 2,3-dioxygenase 1 [Source:HGNC Symbol;Acc:6059]                                          | 3.70   |
| CNEUD1-022 | 4            | ENSG00000148450 | MSRB2         | methionine sulfoxide reductase B2 [Source:HGNC Symbol;Acc:17061]                                     | 0.63   |
| CNEUD1-023 | 3            | ENSG00000119686 | AC007182.1    | Feline leukemia virus subgroup C receptor-related protein 2 [Source:UniProtKB/Swiss-Prot;Acc:Q9UPI3] | 2.37   |
| CNEUD1-023 | 3            | ENSG00000104626 | ERI1          | exoribonuclease 1 [Source:HGNC Symbol;Acc:23994]                                                     | 0.68   |

| Cluster ID | Cluster Size | Gene ID         | Gene Name     | Gene Description                                                                           | Log FC |
|------------|--------------|-----------------|---------------|--------------------------------------------------------------------------------------------|--------|
| CNEUD1-023 | 3            | ENSG00000234571 | RP5-998N21.4  |                                                                                            | 3.20   |
| CNEUD1-024 | 6            | ENSG00000234290 | AC116366.6    |                                                                                            | 0.68   |
| CNEUD1-024 | 6            | ENSG00000175643 | C16orf75      | chromosome 16 open reading frame 75 [Source:HGNC Symbol;Acc:28349]                         | 1.33   |
| CNEUD1-024 | 6            | ENSG00000115392 | FANCL         | Fanconi anemia, complementation group L [Source:HGNC Symbol;Acc:20748]                     | 1.13   |
| CNEUD1-024 | 6            | ENSG00000108375 | RNF43         | ring finger protein 43 [Source:HGNC Symbol;Acc:18505]                                      | 0.73   |
| CNEUD1-024 | 6            | ENSG00000251136 | RP11-37B2.1   |                                                                                            | 1.32   |
| CNEUD1-024 | 6            | ENSG00000202533 | Y_RNA_202533Y | RNA [Source:RFAM;Acc:RF00019]                                                              | 0.89   |
| CNEUD1-025 | 5            | ENSG00000216588 | IGSF23        | immunoglobulin superfamily, member 23 [Source:HGNC Symbol;Acc:40040]                       | -0.75  |
| CNEUD1-025 | 5            | ENSG00000174004 | LRRC33        | leucine rich repeat containing 33 [Source:HGNC Symbol;Acc:24613]                           | -0.73  |
| CNEUD1-025 | 5            | ENSG0000021762  | OSBPL5        | oxysterol binding protein-like 5 [Source:HGNC Symbol;Acc:16392]                            | -0.62  |
| CNEUD1-025 | 5            | ENSG00000149782 | PLCB3         | phospholipase C, beta 3 (phosphatidylinositol-specific) [Source:HGNC Symbol;Acc:9056]      | -0.61  |
| CNEUD1-025 | 5            | ENSG00000161980 | POLR3K        | polymerase (RNA) III (DNA directed) polypeptide K, 12.3 kDa [Source:HGNC Symbol;Acc:14121] | -0.80  |
| CNEUD1-026 | 6            | ENSG00000143162 | CREG1         | cellular repressor of E1A-stimulated genes 1 [Source:HGNC Symbol;Acc:2351]                 | 0.91   |
| CNEUD1-026 | 6            | ENSG00000107566 | ERLIN1        | ER lipid raft associated 1 [Source:HGNC Symbol;Acc:16947]                                  | 1.22   |
| CNEUD1-026 | 6            | ENSG00000164715 | LMTK2         | lemur tyrosine kinase 2 [Source:HGNC Symbol;Acc:17880]                                     | 0.73   |
| CNEUD1-026 | 6            | ENSG00000068971 | PPP2R5B       | protein phosphatase 2, regulatory subunit B', beta [Source:HGNC Symbol;Acc:9310]           | 0.89   |
| CNEUD1-026 | 6            | ENSG00000139832 | RAB20         | RAB20, member RAS oncogene family [Source:HGNC Symbol;Acc:18260]                           | 0.93   |
| CNEUD1-026 | 6            | ENSG00000250608 | RP11-933H2.4  |                                                                                            | 0.89   |

**Table A64:** Significant gene clusters (RNA-Seq, Neutrophils, Day 1)

| Cluster ID | Cluster Size | Gene ID         | Gene Name | Gene Description                                                                           | Log FC |
|------------|--------------|-----------------|-----------|--------------------------------------------------------------------------------------------|--------|
| CNEUD3-001 | 2            | ENSG00000137628 | DDX60     | DEAD (Asp-Glu-Ala-Asp) box polypeptide 60 [Source:HGNC Symbol;Acc:25942]                   | 1.58   |
| CNEUD3-001 | 2            | ENSG00000152778 | IFIT5     | interferon-induced protein with tetratricopeptide repeats 5 [Source:HGNC Symbol;Acc:13328] | 1.10   |
| CNEUD3-002 | 2            | ENSG00000178685 | PARP10    | poly (ADP-ribose) polymerase family, member 10 [Source:HGNC Symbol;Acc:25895]              | 0.59   |
| CNEUD3-002 | 2            | ENSG00000124256 | ZBP1      | Z-DNA binding protein 1 [Source:HGNC Symbol;Acc:16176]                                     | 0.66   |
| CNEUD3-003 | 6            | ENSG00000138642 | HERC6     | hect domain and RLD 6 [Source:HGNC Symbol;Acc:26072]                                       | 1.08   |
| CNEUD3-003 | 6            | ENSG00000137965 | IFI44     | interferon-induced protein 44 [Source:HGNC Symbol;Acc:16938]                               | 2.14   |
| CNEUD3-003 | 6            | ENSG00000137959 | IFI44L    | interferon-induced protein 44-like [Source:HGNC Symbol;Acc:17817]                          | 2.37   |

| Cluster ID | Cluster Size | Gene ID         | Gene Name  | Gene Description                                                                                   | Log FC |
|------------|--------------|-----------------|------------|----------------------------------------------------------------------------------------------------|--------|
| CNEUD3-003 | 6            | ENSG00000111335 | OAS2       | 2'-5'-oligoadenylate synthetase 2, 69/71kDa [Source:HGNC Symbol;Acc:8087]                          | 2.86   |
| CNEUD3-003 | 6            | ENSG00000111331 | OAS3       | 2'-5'-oligoadenylate synthetase 3, 100kDa [Source:HGNC Symbol;Acc:8088]                            | 2.15   |
| CNEUD3-003 | 6            | ENSG00000141664 | ZCCHC2     | zinc finger, CCHC domain containing 2 [Source:HGNC Symbol;Acc:22916]                               | 0.79   |
| CNEUD3-004 | 5            | ENSG00000126709 | IFI6       | interferon, alpha-inducible protein 6 [Source:HGNC Symbol;Acc:4054]                                | 1.49   |
| CNEUD3-004 | 5            | ENSG00000187608 | ISG15      | ISG15 ubiquitin-like modifier [Source:HGNC Symbol;Acc:4053]                                        | 1.54   |
| CNEUD3-004 | 5            | ENSG00000160932 | LY6E       | lymphocyte antigen 6 complex, locus E [Source:HGNC Symbol;Acc:6727]                                | 3.41   |
| CNEUD3-004 | 5            | ENSG00000125148 | MT2A       | metallothionein 2A [Source:HGNC Symbol;Acc:7406]                                                   | 1.72   |
| CNEUD3-004 | 5            | ENSG00000089127 | OAS1       | 2'-5'-oligoadenylate synthetase 1, 40/46kDa [Source:HGNC Symbol;Acc:8086]                          | 2.69   |
| CNEUD3-005 | 3            | ENSG00000228318 | AP001610.5 |                                                                                                    | 1.39   |
| CNEUD3-005 | 3            | ENSG00000181381 | DDX60L     | DEAD (Asp-Glu-Ala-Asp) box polypeptide 60-like [Source:HGNC Symbol;Acc:26429]                      |        |
| CNEUD3-005 | 3            | ENSG00000112343 | TRIM38     | tripartite motif containing 38 [Source:HGNC Symbol;Acc:10059]                                      |        |
| CNEUD3-006 | 3            | ENSG00000130303 | BST2       | bone marrow stromal cell antigen 2 [Source:HGNC Symbol;Acc:1119]                                   | 0.99   |
| CNEUD3-006 | 3            | ENSG00000185885 | IFITM1     | interferon induced transmembrane protein 1 (9-27) [Source:HGNC Symbol;Acc:5412]                    |        |
| CNEUD3-006 | 3            | ENSG00000156587 | UBE2L6     | ubiquitin-conjugating enzyme E2L 6 [Source:HGNC Symbol;Acc:12490]                                  |        |
| CNEUD3-007 | 3            | ENSG00000225964 | AC017076.5 |                                                                                                    | 2.06   |
| CNEUD3-007 | 3            | ENSG00000106100 | NOD1       | nucleotide-binding oligomerization domain containing 1 [Source:HGNC Symbol;Acc:16390]              |        |
| CNEUD3-007 | 3            | ENSG00000138760 | SCARB2     | scavenger receptor class B, member 2 [Source:HGNC Symbol;Acc:1665]                                 | 0.62   |
| CNEUD3-008 | 3            | ENSG00000078081 | LAMP3      | lysosomal-associated membrane protein 3 [Source:HGNC Symbol;Acc:14582]                             | 0.97   |
| CNEUD3-008 | 3            | ENSG00000002549 | LAP3       | leucine aminopeptidase 3 [Source:HGNC Symbol;Acc:18449]                                            | 0.83   |
| CNEUD3-008 | 3            | ENSG00000013374 | NUB1       | negative regulator of ubiquitin-like proteins 1 [Source:HGNC Symbol;Acc:17623]                     |        |
| CNEUD3-009 | 3            | ENSG00000172159 | FRMD3      | FERM domain containing 3 [Source:HGNC Symbol;Acc:24125]                                            | 0.98   |
| CNEUD3-009 | 3            | ENSG00000184898 | RBM43      | RNA binding motif protein 43 [Source:HGNC Symbol;Acc:24790]                                        |        |
| CNEUD3-009 | 3            | ENSG00000085449 | WDFY1      | WD repeat and FYVE domain containing 1 [Source:HGNC Symbol;Acc:20451]                              |        |
| CNEUD3-010 | 4            | ENSG00000168405 | CMAHP      | cytidine monophospho-N-acetylneuraminic acid hydroxylase, pseudogene [Source:HGNC Symbol;Acc:2098] | 0.61   |
| CNEUD3-010 | 4            | ENSG00000023171 | GRAMD1B    | GRAM domain containing 1B [Source:HGNC Symbol;Acc:29214]                                           | 0.66   |
| CNEUD3-010 | 4            | ENSG00000140853 | NLR5       | NLR family, CARD domain containing 5 [Source:HGNC Symbol;Acc:29933]                                |        |
| CNEUD3-010 | 4            | ENSG00000071575 | TRIB2      | tribbles homolog 2 (Drosophila) [Source:HGNC Symbol;Acc:30809]                                     | 1.68   |
| CNEUD3-011 | 9            | ENSG00000163568 | AIM2       | absent in melanoma 2 [Source:HGNC Symbol;Acc:357]                                                  | 0.67   |

| Cluster ID | Cluster Size | Gene ID         | Gene Name   | Gene Description                                                                               | Log FC |
|------------|--------------|-----------------|-------------|------------------------------------------------------------------------------------------------|--------|
| CNEUD3-011 | 9            | ENSG00000100342 | APOL1       | apolipoprotein L, 1 [Source:HGNC Symbol;Acc:618]                                               |        |
| CNEUD3-011 | 9            | ENSG00000128335 | APOL2       | apolipoprotein L, 2 [Source:HGNC Symbol;Acc:619]                                               |        |
| CNEUD3-011 | 9            | ENSG00000111801 | BTN3A3      | butyrophilin, subfamily 3, member A3 [Source:HGNC Symbol;Acc:1140]                             | 0.68   |
| CNEUD3-011 | 9            | ENSG00000166801 | FAM111A     | family with sequence similarity 111, member A [Source:HGNC Symbol;Acc:24725]                   |        |
| CNEUD3-011 | 9            | ENSG00000106560 | GIMAP2      | GTPase, IMAP family member 2 [Source:HGNC Symbol;Acc:21789]                                    | 0.63   |
| CNEUD3-011 | 9            | ENSG00000168394 | TAP1        | transporter 1, ATP-binding cassette, sub-family B (MDR/TAP) [Source:HGNC Symbol;Acc:43]        |        |
| CNEUD3-011 | 9            | ENSG00000204267 | TAP2        | transporter 2, ATP-binding cassette, sub-family B (MDR/TAP) [Source:HGNC Symbol;Acc:44]        |        |
| CNEUD3-011 | 9            | ENSG00000132109 | TRIM21      | tripartite motif containing 21 [Source:HGNC Symbol;Acc:11312]                                  |        |
| CNEUD3-012 | 3            | ENSG00000165732 | DDX21       | DEAD (Asp-Glu-Ala-Asp) box polypeptide 21 [Source:HGNC Symbol;Acc:2744]                        | -0.60  |
| CNEUD3-012 | 3            | ENSG00000090339 | ICAM1       | intercellular adhesion molecule 1 [Source:HGNC Symbol;Acc:5344]                                |        |
| CNEUD3-012 | 3            | ENSG00000185022 | MAFF        | v-maf musculoaponeurotic fibrosarcoma oncogene homolog F (avian) [Source:HGNC Symbol;Acc:6780] |        |
| CNEUD3-013 | 4            | ENSG00000251002 | AE000661.37 |                                                                                                | 0.72   |
| CNEUD3-013 | 4            | ENSG00000110848 | CD69        | CD69 molecule [Source:HGNC Symbol;Acc:1694]                                                    |        |
| CNEUD3-013 | 4            | ENSG00000150337 | FCGR1A      | Fc fragment of IgG, high affinity Ia, receptor (CD64) [Source:HGNC Symbol;Acc:3613]            | 0.61   |
| CNEUD3-013 | 4            | ENSG00000198019 | FCGR1B      | Fc fragment of IgG, high affinity Ib, receptor (CD64) [Source:HGNC Symbol;Acc:3614]            |        |
| CNEUD3-014 | 3            | ENSG00000183347 | GBP6        | guanylate binding protein family, member 6 [Source:HGNC Symbol;Acc:25395]                      | 0.89   |
| CNEUD3-014 | 3            | ENSG00000130487 | KLHDC7B     | kelch domain containing 7B [Source:HGNC Symbol;Acc:25145]                                      | 0.63   |
| CNEUD3-014 | 3            | ENSG00000070501 | POLB        | polymerase (DNA directed), beta [Source:HGNC Symbol;Acc:9174]                                  |        |
| CNEUD3-015 | 3            | ENSG00000139679 | LPAR6       | lysophosphatidic acid receptor 6 [Source:HGNC Symbol;Acc:15520]                                | 0.66   |
| CNEUD3-015 | 3            | ENSG00000100889 | PCK2        | phosphoenolpyruvate carboxykinase 2 (mitochondrial) [Source:HGNC Symbol;Acc:8725]              | 0.86   |
| CNEUD3-015 | 3            | ENSG00000138385 | SSB         | Sjogren syndrome antigen B (autoantigen La) [Source:HGNC Symbol;Acc:11316]                     |        |

**Table A65:** Significant gene clusters (RNA-Seq, Neutrophils, Day 3)

| Cluster ID    | Cluster Size | Gene ID         | Gene Name | Gene Description                                                                |
|---------------|--------------|-----------------|-----------|---------------------------------------------------------------------------------|
| CNEUD1D28-001 | 2            | ENSG00000117228 | GBP1      | guanylate binding protein 1, interferon-inducible [Source:HGNC Symbol;Acc:4182] |
| CNEUD1D28-001 | 2            | ENSG00000154451 | GBP5      | guanylate binding protein 5 [Source:HGNC Symbol;Acc:19895]                      |
| CNEUD1D28-002 | 2            | ENSG00000100342 | APOL1     | apolipoprotein L, 1 [Source:HGNC Symbol;Acc:618]                                |
| CNEUD1D28-002 | 2            | ENSG00000128335 | APOL2     | apolipoprotein L, 2 [Source:HGNC Symbol;Acc:619]                                |
| CNEUD1D28-003 | 2            | ENSG00000119950 | MXI1      | MAX interactor 1 [Source:HGNC Symbol;Acc:7534]                                  |
| CNEUD1D28-003 | 2            | ENSG00000185989 | RASA3     | RAS p21 protein activator 3 [Source:HGNC Symbol;Acc:20331]                      |

| Cluster ID    | Cluster Size | Gene ID         | Gene Name     | Gene Description                                                                                               |
|---------------|--------------|-----------------|---------------|----------------------------------------------------------------------------------------------------------------|
| CNEUD1D28-004 | 2            | ENSG00000236525 | AC007278.2    |                                                                                                                |
| CNEUD1D28-004 | 2            | ENSG00000234389 | AC007278.3    |                                                                                                                |
| CNEUD1D28-005 | 7            | ENSG00000197142 | ACSL5         | acyl-CoA synthetase long-chain family member 5 [Source:HGNC Symbol;Acc:16526]                                  |
| CNEUD1D28-005 | 7            | ENSG00000157693 | C9orf91       | chromosome 9 open reading frame 91 [Source:HGNC Symbol;Acc:24513]                                              |
| CNEUD1D28-005 | 7            | ENSG00000079385 | CEACAM1       | carcinoembryonic antigen-related cell adhesion molecule 1 (biliary glycoprotein) [Source:HGNC Symbol;Acc:1814] |
| CNEUD1D28-005 | 7            | ENSG00000164308 | ERAP2         | endoplasmic reticulum aminopeptidase 2 [Source:HGNC Symbol;Acc:29499]                                          |
| CNEUD1D28-005 | 7            | ENSG00000166801 | FAM111A       | family with sequence similarity 111, member A [Source:HGNC Symbol;Acc:24725]                                   |
| CNEUD1D28-005 | 7            | ENSG00000070501 | POLB          | polymerase (DNA directed), beta [Source:HGNC Symbol;Acc:9174]                                                  |
| CNEUD1D28-005 | 7            | ENSG00000085449 | WDFY1         | WD repeat and FYVE domain containing 1 [Source:HGNC Symbol;Acc:20451]                                          |
| CNEUD1D28-006 | 2            | ENSG00000090339 | ICAM1         | intercellular adhesion molecule 1 [Source:HGNC Symbol;Acc:5344]                                                |
| CNEUD1D28-006 | 2            | ENSG00000185022 | MAFF          | v-maf musculoaponeurotic fibrosarcoma oncogene homolog F (avian) [Source:HGNC Symbol;Acc:6780]                 |
| CNEUD1D28-007 | 2            | ENSG00000226012 | AP001434.2    |                                                                                                                |
| CNEUD1D28-007 | 2            | ENSG00000237135 | RP11-330O11.2 |                                                                                                                |

**Table A66:** Significant gene clusters (RNA-Seq, Neutrophils, Day 1-28)

| Cluster ID | Cluster Size | Gene ID         | Gene Name  | Gene Description                                                                          | Log FC |
|------------|--------------|-----------------|------------|-------------------------------------------------------------------------------------------|--------|
| CNKCD1-001 | 2            | ENSG00000116016 | EPAS1      | endothelial PAS domain protein 1 [Source:HGNC Symbol;Acc:3374]                            | 0.95   |
| CNKCD1-001 | 2            | ENSG00000121621 | KIF18A     | kinesin family member 18A [Source:HGNC Symbol;Acc:29441]                                  |        |
| CNKCD1-002 | 19           | ENSG00000247275 | AL160008.1 |                                                                                           | 0.76   |
| CNKCD1-002 | 19           | ENSG00000125462 | C1orf61    | chromosome 1 open reading frame 61 [Source:HGNC Symbol;Acc:30780]                         | 0.69   |
| CNKCD1-002 | 19           | ENSG00000087237 | CETP       | cholesteryl ester transfer protein, plasma [Source:HGNC Symbol;Acc:1869]                  | 0.99   |
| CNKCD1-002 | 19           | ENSG00000134326 | CMPK2      | cytidine monophosphate (UMP-CMP) kinase 2, mitochondrial [Source:HGNC Symbol;Acc:27015]   | 0.60   |
| CNKCD1-002 | 19           | ENSG00000184371 | CSF1       | colony stimulating factor 1 (macrophage) [Source:HGNC Symbol;Acc:2432]                    | 1.36   |
| CNKCD1-002 | 19           | ENSG00000133106 | EPST11     | epithelial stromal interaction 1 (breast) [Source:HGNC Symbol;Acc:16465]                  | 0.67   |
| CNKCD1-002 | 19           | ENSG00000010030 | ETV7       | ets variant 7 [Source:HGNC Symbol;Acc:18160]                                              | 1.62   |
| CNKCD1-002 | 19           | ENSG00000117228 | GBP1       | guanylate binding protein 1, interferon-inducible [Source:HGNC Symbol;Acc:4182]           | 1.21   |
| CNKCD1-002 | 19           | ENSG00000140511 | HAPLN3     | hyaluronan and proteoglycan link protein 3 [Source:HGNC Symbol;Acc:21446]                 | 1.02   |
| CNKCD1-002 | 19           | ENSG00000137959 | IFI44L     | interferon-induced protein 44-like [Source:HGNC Symbol;Acc:17817]                         | 1.09   |
| CNKCD1-002 | 19           | ENSG00000119917 | IFIT3      | interferon-induced protein with tetratricopeptide repeats 3 [Source:HGNC Symbol;Acc:5411] | 0.61   |

| Cluster ID | Cluster Size | Gene ID         | Gene Name      | Gene Description                                                                                    | Log FC |
|------------|--------------|-----------------|----------------|-----------------------------------------------------------------------------------------------------|--------|
| CNKCD1-002 | 19           | ENSG00000125347 | IRF1           | interferon regulatory factor 1 [Source:HGNC Symbol;Acc:6116]                                        | 0.66   |
| CNKCD1-002 | 19           | ENSG00000120254 | MTHFD1L        | methylenetetrahydrofolate dehydrogenase (NADP+ dependent) 1-like [Source:HGNC Symbol;Acc:21055]     | 0.65   |
| CNKCD1-002 | 19           | ENSG00000111331 | OAS3           | 2'-5'-oligoadenylate synthetase 3, 100kDa [Source:HGNC Symbol;Acc:8088]                             | 0.61   |
| CNKCD1-002 | 19           | ENSG00000177989 | ODF3B          | outer dense fiber of sperm tails 3B [Source:HGNC Symbol;Acc:34388]                                  | 0.72   |
| CNKCD1-002 | 19           | ENSG00000138496 | PARP9          | poly (ADP-ribose) polymerase family, member 9 [Source:HGNC Symbol;Acc:24118]                        | 0.76   |
| CNKCD1-002 | 19           | ENSG00000170476 | RP11-1280122.1 | Plasma cell-induced resident endoplasmic reticulum protein [Source:UniProtKB/Swiss-Prot;Acc:Q8WU39] | 0.64   |
| CNKCD1-002 | 19           | ENSG00000115415 | STAT1          | signal transducer and activator of transcription 1, 91kDa [Source:HGNC Symbol;Acc:11362]            | 1.23   |
| CNKCD1-002 | 19           | ENSG00000025708 | TYMP           | thymidine phosphorylase [Source:HGNC Symbol;Acc:3148]                                               | 0.73   |

**Table A67:** Significant gene clusters (RNA-Seq, NK-cells, Day 1)

| Cluster ID | Cluster Size | Gene ID         | Gene Name | Gene Description                                                                                    | Log FC |
|------------|--------------|-----------------|-----------|-----------------------------------------------------------------------------------------------------|--------|
| CNKCD3-001 | 3            | ENSG00000101412 | E2F1      | E2F transcription factor 1 [Source:HGNC Symbol;Acc:3113]                                            | 0.86   |
| CNKCD3-001 | 3            | ENSG00000104738 | MCM4      | minichromosome maintenance complex component 4 [Source:HGNC Symbol;Acc:6947]                        | 0.60   |
| CNKCD3-001 | 3            | ENSG00000051341 | POLQ      | polymerase (DNA directed), theta [Source:HGNC Symbol;Acc:9186]                                      | 0.78   |
| CNKCD3-002 | 5            | ENSG00000237649 | KIFC1     | kinesin family member C1 [Source:HGNC Symbol;Acc:6389]                                              | 1.14   |
| CNKCD3-002 | 5            | ENSG00000121152 | NCAPH     | non-SMC condensin I complex, subunit H [Source:HGNC Symbol;Acc:1112]                                | 0.77   |
| CNKCD3-002 | 5            | ENSG00000137804 | NUSAP1    | nucleolar and spindle associated protein 1 [Source:HGNC Symbol;Acc:18538]                           | 0.97   |
| CNKCD3-002 | 5            | ENSG00000117632 | STMN1     | stathmin 1 [Source:HGNC Symbol;Acc:6510]                                                            | 0.64   |
| CNKCD3-002 | 5            | ENSG00000176890 | TYMS      | thymidylate synthetase [Source:HGNC Symbol;Acc:12441]                                               | 0.89   |
| CNKCD3-003 | 10           | ENSG00000066279 | ASPM      | asp (abnormal spindle) homolog, microcephaly associated (Drosophila) [Source:HGNC Symbol;Acc:19048] | 1.18   |
| CNKCD3-003 | 10           | ENSG00000089685 | BIRC5     | baculoviral IAP repeat containing 5 [Source:HGNC Symbol;Acc:593]                                    | 1.02   |
| CNKCD3-003 | 10           | ENSG00000169679 | BUB1      | budding uninhibited by benzimidazoles 1 homolog (yeast) [Source:HGNC Symbol;Acc:1148]               | 0.85   |
| CNKCD3-003 | 10           | ENSG00000117399 | CDC20     | cell division cycle 20 homolog (S. cerevisiae) [Source:HGNC Symbol;Acc:1723]                        | 1.10   |
| CNKCD3-003 | 10           | ENSG00000117724 | CENPF     | centromere protein F, 350/400kDa (mitosin) [Source:HGNC Symbol;Acc:1857]                            | 0.89   |
| CNKCD3-003 | 10           | ENSG00000075218 | GTSE1     | G-2 and S-phase expressed 1 [Source:HGNC Symbol;Acc:13698]                                          | 0.70   |
| CNKCD3-003 | 10           | ENSG00000148773 | MKI67     | antigen identified by monoclonal antibody Ki-67 [Source:HGNC Symbol;Acc:7107]                       | 1.01   |
| CNKCD3-003 | 10           | ENSG00000165480 | SKA3      | spindle and kinetochore associated complex subunit 3 [Source:HGNC Symbol;Acc:20262]                 | 1.06   |

| Cluster ID | Cluster Size | Gene ID         | Gene Name | Gene Description                                                                     | Log FC |
|------------|--------------|-----------------|-----------|--------------------------------------------------------------------------------------|--------|
| CNKCD3-003 | 10           | ENSG00000131747 | TOP2A     | topoisomerase (DNA) II alpha 170kDa [Source:HGNC Symbol;Acc:11989]                   | 1.17   |
| CNKCD3-003 | 10           | ENSG00000088325 | TPX2      | TPX2, microtubule-associated, homolog (Xenopus laevis) [Source:HGNC Symbol;Acc:1249] | 0.96   |

**Table A68:** Significant gene clusters (RNA-Seq, NK-cells, Day 3)

| Cluster ID  | Cluster Size | Gene ID         | Gene Name | Gene Description                                                                                                                                | Log FC |
|-------------|--------------|-----------------|-----------|-------------------------------------------------------------------------------------------------------------------------------------------------|--------|
| CNKCD28-001 | 2            | ENSG00000196189 | SEMA4A    | sema domain, immunoglobulin domain (Ig), transmembrane domain (TM) and short cytoplasmic domain, (semaphorin) 4A [Source:HGNC Symbol;Acc:10729] | -1.10  |
| CNKCD28-001 | 2            | ENSG00000196562 | SULF2     | sulfatase 2 [Source:HGNC Symbol;Acc:20392]                                                                                                      | -0.97  |
| CNKCD28-002 | 3            | ENSG00000214212 | C19orf38  | chromosome 19 open reading frame 38 [Source:HGNC Symbol;Acc:34073]                                                                              | -1.04  |
| CNKCD28-002 | 3            | ENSG00000216490 | IFI30     | interferon, gamma-inducible protein 30 [Source:HGNC Symbol;Acc:5398]                                                                            | -1.09  |
| CNKCD28-002 | 3            | ENSG00000185215 | TNFAIP2   | tumor necrosis factor, alpha-induced protein 2 [Source:HGNC Symbol;Acc:11895]                                                                   | -1.46  |
| CNKCD28-003 | 4            | ENSG00000105383 | CD33      | CD33 molecule [Source:HGNC Symbol;Acc:1659]                                                                                                     | -1.16  |
| CNKCD28-003 | 4            | ENSG00000239998 | LILRA2    | leukocyte immunoglobulin-like receptor, subfamily A (with TM domain), member 2 [Source:HGNC Symbol;Acc:6603]                                    | -1.41  |
| CNKCD28-003 | 4            | ENSG00000112799 | LY86      | lymphocyte antigen 86 [Source:HGNC Symbol;Acc:16837]                                                                                            | -1.28  |
| CNKCD28-003 | 4            | ENSG00000035862 | TIMP2     | TIMP metalloproteinase inhibitor 2 [Source:HGNC Symbol;Acc:11821]                                                                               | -0.94  |
| CNKCD28-004 | 2            | ENSG00000187796 | CARD9     | caspase recruitment domain family, member 9 [Source:HGNC Symbol;Acc:16391]                                                                      | -0.80  |
| CNKCD28-004 | 2            | ENSG00000109113 | RAB34     | RAB34, member RAS oncogene family [Source:HGNC Symbol;Acc:16519]                                                                                | -1.08  |
| CNKCD28-005 | 3            | ENSG00000101439 | CST3      | cystatin C [Source:HGNC Symbol;Acc:2475]                                                                                                        | -0.89  |
| CNKCD28-005 | 3            | ENSG00000103811 | CTSH      | cathepsin H [Source:HGNC Symbol;Acc:2535]                                                                                                       | -0.94  |
| CNKCD28-005 | 3            | ENSG00000025708 | TYMP      | thymidine phosphorylase [Source:HGNC Symbol;Acc:3148]                                                                                           |        |
| CNKCD28-006 | 8            | ENSG00000146192 | FGD2      | FYVE, RhoGEF and PH domain containing 2 [Source:HGNC Symbol;Acc:3664]                                                                           | -0.88  |
| CNKCD28-006 | 8            | ENSG00000204681 | GABBR1    | gamma-aminobutyric acid (GABA) B receptor, 1 [Source:HGNC Symbol;Acc:4070]                                                                      | -0.67  |
| CNKCD28-006 | 8            | ENSG00000175857 | GAPT      | GRB2-binding adaptor protein, transmembrane [Source:HGNC Symbol;Acc:26588]                                                                      | -1.11  |
| CNKCD28-006 | 8            | ENSG00000242574 | HLA-DMB   | major histocompatibility complex, class II, DM beta [Source:HGNC Symbol;Acc:4935]                                                               | -0.69  |
| CNKCD28-006 | 8            | ENSG00000231389 | HLA-DPA1  | major histocompatibility complex, class II, DP alpha 1 [Source:HGNC Symbol;Acc:4938]                                                            | -0.61  |
| CNKCD28-006 | 8            | ENSG00000204287 | HLA-DRA   | major histocompatibility complex, class II, DR alpha [Source:HGNC Symbol;Acc:4947]                                                              | -1.13  |
| CNKCD28-006 | 8            | ENSG00000196126 | HLA-DRB1  | major histocompatibility complex, class II, DR beta 1 [Source:HGNC Symbol;Acc:4948]                                                             | -0.84  |

| Cluster ID  | Cluster Size | Gene ID         | Gene Name     | Gene Description                                                                                                      | Log FC |
|-------------|--------------|-----------------|---------------|-----------------------------------------------------------------------------------------------------------------------|--------|
| CNKCD28-006 | 8            | ENSG00000167207 | NOD2          | nucleotide-binding oligomerization domain containing 2 [Source:HGNC Symbol;Acc:5331]                                  | -0.72  |
| CNKCD28-007 | 6            | ENSG00000177706 | FAM20C        | family with sequence similarity 20, member C [Source:HGNC Symbol;Acc:22140]                                           | -1.08  |
| CNKCD28-007 | 6            | ENSG00000179344 | HLA-DQB1      | major histocompatibility complex, class II, DQ beta 1 [Source:HGNC Symbol;Acc:4944]                                   | -0.94  |
| CNKCD28-007 | 6            | ENSG00000173801 | JUP           | junction plakoglobin [Source:HGNC Symbol;Acc:6207]                                                                    | -1.14  |
| CNKCD28-007 | 6            | ENSG00000154237 | LRRK1         | leucine-rich repeat kinase 1 [Source:HGNC Symbol;Acc:18608]                                                           | -0.96  |
| CNKCD28-007 | 6            | ENSG00000138119 | MYOF          | myoferlin [Source:HGNC Symbol;Acc:3656]                                                                               | -1.30  |
| CNKCD28-007 | 6            | ENSG00000183023 | SLC8A1        | solute carrier family 8 (sodium/calcium exchanger), member 1 [Source:HGNC Symbol;Acc:11068]                           | -1.44  |
| CNKCD28-008 | 3            | ENSG00000173083 | HPSE          | heparanase [Source:HGNC Symbol;Acc:5164]                                                                              | -0.62  |
| CNKCD28-008 | 3            | ENSG00000238113 | RP11-262H14.1 |                                                                                                                       | -0.74  |
| CNKCD28-008 | 3            | ENSG00000075223 | SEMA3C        | sema domain, immunoglobulin domain (Ig), short basic domain, secreted, (semaphorin) 3C [Source:HGNC Symbol;Acc:10725] | -0.88  |

**Table A69:** Significant gene clusters (RNA-Seq, NK-cells, Day 28)

| Cluster ID    | Cluster Size | Gene ID         | Gene Name | Gene Description                                                                                             |
|---------------|--------------|-----------------|-----------|--------------------------------------------------------------------------------------------------------------|
| CNKCD1D28-001 | 2            | ENSG00000138496 | PARP9     | poly (ADP-ribose) polymerase family, member 9 [Source:HGNC Symbol;Acc:24118]                                 |
| CNKCD1D28-001 | 2            | ENSG00000115415 | STAT1     | signal transducer and activator of transcription 1, 91kDa [Source:HGNC Symbol;Acc:11362]                     |
| CNKCD1D28-002 | 2            | ENSG00000177989 | ODF3B     | outer dense fiber of sperm tails 3B [Source:HGNC Symbol;Acc:34388]                                           |
| CNKCD1D28-002 | 2            | ENSG00000025708 | TYMP      | thymidine phosphorylase [Source:HGNC Symbol;Acc:3148]                                                        |
| CNKCD1D28-003 | 3            | ENSG00000105383 | CD33      | CD33 molecule [Source:HGNC Symbol;Acc:1659]                                                                  |
| CNKCD1D28-003 | 3            | ENSG00000239998 | LILRA2    | leukocyte immunoglobulin-like receptor, subfamily A (with TM domain), member 2 [Source:HGNC Symbol;Acc:6603] |
| CNKCD1D28-003 | 3            | ENSG00000035862 | TIMP2     | TIMP metalloproteinase inhibitor 2 [Source:HGNC Symbol;Acc:11821]                                            |

**Table A70:** Significant gene clusters (RNA-Seq, NK-cells, Day 1-28)

| Cluster ID | Cluster Size | Gene ID         | Gene Name | Gene Description                                                                | Log FC |
|------------|--------------|-----------------|-----------|---------------------------------------------------------------------------------|--------|
| CTCLD1-001 | 2            | ENSG00000135148 | TRAFD1    | TRAF-type zinc finger domain containing 1 [Source:HGNC Symbol;Acc:24808]        | 0.60   |
| CTCLD1-001 | 2            | ENSG00000025708 | TYMP      | thymidine phosphorylase [Source:HGNC Symbol;Acc:3148]                           | 0.94   |
| CTCLD1-002 | 7            | ENSG00000133106 | EPSTI1    | epithelial stromal interaction 1 (breast) [Source:HGNC Symbol;Acc:16465]        | 0.99   |
| CTCLD1-002 | 7            | ENSG00000117228 | GBP1      | guanylate binding protein 1, interferon-inducible [Source:HGNC Symbol;Acc:4182] | 1.24   |



| Cluster ID | Cluster Size | Gene ID         | Gene Name | Gene Description                                                                              | Log FC |
|------------|--------------|-----------------|-----------|-----------------------------------------------------------------------------------------------|--------|
| CTCLD1-002 | 7            | ENSG00000162645 | GBP2      | guanylate binding protein 2, interferon-inducible [Source:HGNC Symbol;Acc:4183]               | 0.62   |
| CTCLD1-002 | 7            | ENSG00000162654 | GBP4      | guanylate binding protein 4 [Source:HGNC Symbol;Acc:20480]                                    | 0.87   |
| CTCLD1-002 | 7            | ENSG00000138496 | PARP9     | poly (ADP-ribose) polymerase family, member 9 [Source:HGNC Symbol;Acc:24118]                  | 1.12   |
| CTCLD1-002 | 7            | ENSG00000115415 | STAT1     | signal transducer and activator of transcription 1, 91kDa [Source:HGNC Symbol;Acc:11362]      | 1.43   |
| CTCLD1-002 | 7            | ENSG00000156587 | UBE2L6    | ubiquitin-conjugating enzyme E2L 6 [Source:HGNC Symbol;Acc:12490]                             | 0.66   |
| CTCLD1-003 | 3            | ENSG00000134326 | CMPK2     | cytidine monophosphate (UMP-CMP) kinase 2, mitochondrial [Source:HGNC Symbol;Acc:27015]       | 0.78   |
| CTCLD1-003 | 3            | ENSG00000119917 | IFIT3     | interferon-induced protein with tetratricopeptide repeats 3 [Source:HGNC Symbol;Acc:54111]    | 1.34   |
| CTCLD1-003 | 3            | ENSG00000134321 | RSAD2     | radical S-adenosyl methionine domain containing 2 [Source:HGNC Symbol;Acc:30908]              | 0.77   |
| CTCLD1-004 | 3            | ENSG00000225492 | GBP1P1    | guanylate binding protein 1, interferon-inducible pseudogene 1 [Source:HGNC Symbol;Acc:39561] | 2.04   |
| CTCLD1-004 | 3            | ENSG00000090339 | ICAM1     | intercellular adhesion molecule 1 [Source:HGNC Symbol;Acc:5344]                               | 0.73   |
| CTCLD1-004 | 3            | ENSG00000125347 | IRF1      | interferon regulatory factor 1 [Source:HGNC Symbol;Acc:6116]                                  | 1.00   |

**Table A71:** Significant gene clusters (RNA-Seq, T-cells, Day 1)

| Cluster ID    | Cluster Size | Gene ID         | Gene Name | Gene Description                                                                        |
|---------------|--------------|-----------------|-----------|-----------------------------------------------------------------------------------------|
| CTCLD1D28-001 | 3            | ENSG00000068079 | IFI35     | interferon-induced protein 35 [Source:HGNC Symbol;Acc:5399]                             |
| CTCLD1D28-001 | 3            | ENSG00000135148 | TRAFD1    | TRAF-type zinc finger domain containing 1 [Source:HGNC Symbol;Acc:24808]                |
| CTCLD1D28-001 | 3            | ENSG00000156587 | UBE2L6    | ubiquitin-conjugating enzyme E2L 6 [Source:HGNC Symbol;Acc:12490]                       |
| CTCLD1D28-002 | 17           | ENSG00000134326 | CMPK2     | cytidine monophosphate (UMP-CMP) kinase 2, mitochondrial [Source:HGNC Symbol;Acc:27015] |
| CTCLD1D28-002 | 17           | ENSG00000163840 | DTX3L     | deltex 3-like (Drosophila) [Source:HGNC Symbol;Acc:30323]                               |
| CTCLD1D28-002 | 17           | ENSG00000133106 | EPST11    | epithelial stromal interaction 1 (breast) [Source:HGNC Symbol;Acc:16465]                |
| CTCLD1D28-002 | 17           | ENSG0000010030  | ETV7      | ets variant 7 [Source:HGNC Symbol;Acc:18160]                                            |
| CTCLD1D28-002 | 17           | ENSG00000117228 | GBP1      | guanylate binding protein 1, interferon-inducible [Source:HGNC Symbol;Acc:4182]         |
| CTCLD1D28-002 | 17           | ENSG00000162645 | GBP2      | guanylate binding protein 2, interferon-inducible [Source:HGNC Symbol;Acc:4183]         |
| CTCLD1D28-002 | 17           | ENSG00000162654 | GBP4      | guanylate binding protein 4 [Source:HGNC Symbol;Acc:20480]                              |
| CTCLD1D28-002 | 17           | ENSG00000154451 | GBP5      | guanylate binding protein 5 [Source:HGNC Symbol;Acc:19895]                              |
| CTCLD1D28-002 | 17           | ENSG00000137965 | IFI44     | interferon-induced protein 44 [Source:HGNC Symbol;Acc:16938]                            |
| CTCLD1D28-002 | 17           | ENSG00000137959 | IFI44L    | interferon-induced protein 44-like [Source:HGNC Symbol;Acc:17817]                       |

| Cluster ID    | Cluster Size | Gene ID         | Gene Name | Gene Description                                                                           |
|---------------|--------------|-----------------|-----------|--------------------------------------------------------------------------------------------|
| CTCLD1D28-002 | 17           | ENSG00000119917 | IFIT3     | interferon-induced protein with tetratricopeptide repeats 3 [Source:HGNC Symbol;Acc:54111] |
| CTCLD1D28-002 | 17           | ENSG00000089127 | OAS1      | 2',5'-oligoadenylate synthetase 1, 40/46kDa [Source:HGNC Symbol;Acc:8086]                  |
| CTCLD1D28-002 | 17           | ENSG00000138496 | PARP9     | poly (ADP-ribose) polymerase family, member 9 [Source:HGNC Symbol;Acc:24118]               |
| CTCLD1D28-002 | 17           | ENSG00000134321 | RSAD2     | radical S-adenosyl methionine domain containing 2 [Source:HGNC Symbol;Acc:30908]           |
| CTCLD1D28-002 | 17           | ENSG00000177409 | SAMD9L    | sterile alpha motif domain containing 9-like [Source:HGNC Symbol;Acc:1349]                 |
| CTCLD1D28-002 | 17           | ENSG00000115415 | STAT1     | signal transducer and activator of transcription 1, 91kDa [Source:HGNC Symbol;Acc:11362]   |
| CTCLD1D28-002 | 17           | ENSG00000132530 | XAF1      | XIAP associated factor 1 [Source:HGNC Symbol;Acc:30932]                                    |

**Table A72:** Significant gene clusters (RNA-Seq, T-cells, Day 1-28)

| Category Type                         | Categories | Distinct<br>#Genes<br>In Sets | Median<br>#Genes<br>Per Set |
|---------------------------------------|------------|-------------------------------|-----------------------------|
| MSigDB BioCarta Pathways              | 217        | 1228                          | 18                          |
| MSigDB Chemical/Genetic Perturbations | 3398       | 18288                         | 44                          |
| MSigDB GO Biological Processes        | 825        | 5914                          | 26                          |
| MSigDB GO Cellular Components         | 233        | 5065                          | 27                          |
| MSigDB GO Molecular Functions         | 396        | 5108                          | 26                          |
| MSigDB Immunologic Signatures         | 1910       | 17782                         | 193                         |
| KEGG Modules                          | 162        | 1075                          | 6                           |
| KEGG Pathways                         | 286        | 6107                          | 58                          |
| MSigDB Reactome Pathways              | 674        | 5595                          | 26                          |

**Table A73:** Overview of gene sets used for the enrichment analysis (RNA-Seq).

| Cell Type (Study Visit Day) | KEGGP<br>n/N(%) | KEGGM<br>n/N(%) | GOBP<br>n/N(%) | GOCC<br>n/N(%) | GOMF<br>n/N(%) | REACP<br>n/N(%) | BIOCP<br>n/N(%) | CHEMG<br>n/N(%) | IMMO<br>n/N(%) |
|-----------------------------|-----------------|-----------------|----------------|----------------|----------------|-----------------|-----------------|-----------------|----------------|
| B-cells (Day 1)             | 5/14(36)        | 2/14(14)        | 6/14(43)       | 2/14(14)       | 5/14(36)       | 8/14(57)        | 2/14(14)        | 14/14(100)      | 14/14(100)     |
| Dendritic cells (Day 1)     | 68/225(30)      | 11/225(5)       | 83/225(37)     | 54/225(24)     | 63/225(28)     | 80/225(36)      | 29/225(13)      | 190/225(84)     | 187/225(83)    |
| Dendritic cells (Day 3)     | 8/13(62)        | 0/13(0)         | 7/13(54)       | 6/13(46)       | 5/13(38)       | 5/13(38)        | 3/13(23)        | 13/13(100)      | 13/13(100)     |
| Monocytes (Day 1)           | 131/406(32)     | 16/406(4)       | 155/406(38)    | 113/406(28)    | 123/406(30)    | 137/406(34)     | 40/406(10)      | 336/406(83)     | 334/406(82)    |
| Neutrophils (Day 1)         | 196/572(34)     | 40/572(7)       | 186/572(33)    | 169/572(30)    | 162/572(28)    | 182/572(32)     | 45/572(8)       | 499/572(87)     | 497/572(87)    |
| Neutrophils (Day 3)         | 37/140(26)      | 5/140(4)        | 39/140(28)     | 40/140(29)     | 25/140(18)     | 41/140(29)      | 4/140(3)        | 124/140(89)     | 123/140(88)    |
| NK-cells (Day 1)            | 11/24(46)       | 3/24(12)        | 11/24(46)      | 8/24(33)       | 8/24(33)       | 9/24(38)        | 3/24(12)        | 21/24(88)       | 21/24(88)      |
| NK-cells (Day 3)            | 25/70(36)       | 2/70(3)         | 33/70(47)      | 27/70(39)      | 23/70(33)      | 33/70(47)       | 10/70(14)       | 68/70(97)       | 68/70(97)      |
| NK-cells (Day 28)           | 29/63(46)       | 2/63(3)         | 25/63(40)      | 26/63(41)      | 26/63(41)      | 26/63(41)       | 6/63(10)        | 61/63(97)       | 60/63(95)      |
| T-cells (Day 1)             | 18/49(37)       | 3/49(6)         | 21/49(43)      | 16/49(33)      | 17/49(35)      | 19/49(39)       | 6/49(12)        | 44/49(90)       | 45/49(92)      |

**Table A74:** Overview of differential genes that mapped to any gene set by category (RNA-Seq). KEGGP: KEGG Pathways, KEGGM: KEGG Modules, GOBP: GO Biological Processes, GOCC: GO Cellular Components, GOMF: GO Molecular Functions, REACP: Reactome Pathways, BIOCP: BioCarta Pathways, CHEMG: Chemical/Genetic Perturbations, IMMO: Immunologic Signatures. n=#mapped SDEG, N=#SDEG.

| Category Name                                         | Category<br>Genes # | Any-reg.<br>SDEG #(%) | Up-reg.<br>SDEG #(%) | Down-reg.<br>SDEG #(%) | P       | FDR    |
|-------------------------------------------------------|---------------------|-----------------------|----------------------|------------------------|---------|--------|
| NUYTTEN EZH2 TARGETS UP                               | 1002                | 9 (0.9)               | 9 (0.9)              | 0 (0)                  | <0.0001 | 0.0012 |
| ZWANG TRANSIENTLY UP BY 1ST EGF PULSE ONLY            | 1723                | 6 (0.3)               | 6 (0.3)              | 0 (0)                  | <0.0001 | 0.0012 |
| ICHIBA GRAFT VERSUS HOST DISEASE D7 UP                | 105                 | 5 (4.8)               | 5 (4.8)              | 0 (0)                  | <0.0001 | 0.0012 |
| MARKEY RB1 ACUTE LOF UP                               | 214                 | 5 (2.3)               | 5 (2.3)              | 0 (0)                  | <0.0001 | 0.0012 |
| WALLACE PROSTATE CANCER RACE UP                       | 275                 | 5 (1.8)               | 5 (1.8)              | 0 (0)                  | <0.0001 | 0.0012 |
| BERTUCCI MEDULLARY VS DUCTAL BREAST CANCER UP         | 200                 | 4 (2)                 | 4 (2)                | 0 (0)                  | <0.0001 | 0.0012 |
| BROWNE INTERFERON RESPONSIVE GENES                    | 68                  | 4 (5.9)               | 4 (5.9)              | 0 (0)                  | <0.0001 | 0.0012 |
| HECKER IFNB1 TARGETS                                  | 92                  | 4 (4.3)               | 4 (4.3)              | 0 (0)                  | <0.0001 | 0.0012 |
| JISON SICKLE CELL DISEASE UP                          | 174                 | 4 (2.3)               | 4 (2.3)              | 0 (0)                  | <0.0001 | 0.0012 |
| MONNIER POSTRADIATION TUMOR ESCAPE DN                 | 357                 | 4 (1.1)               | 4 (1.1)              | 0 (0)                  | <0.0001 | 0.0012 |
| SANA RESPONSE TO IFNG UP                              | 74                  | 4 (5.4)               | 4 (5.4)              | 0 (0)                  | <0.0001 | 0.0012 |
| TAKEDA TARGETS OF NUP98 HOXA9 FUSION 10D UP           | 186                 | 4 (2.2)               | 4 (2.2)              | 0 (0)                  | <0.0001 | 0.0012 |
| TAKEDA TARGETS OF NUP98 HOXA9 FUSION 3D UP            | 178                 | 4 (2.2)               | 4 (2.2)              | 0 (0)                  | <0.0001 | 0.0012 |
| WIELAND UP BY HBV INFECTION                           | 100                 | 4 (4)                 | 4 (4)                | 0 (0)                  | <0.0001 | 0.0012 |
| ALTEMEIER RESPONSE TO LPS WITH MECHANICAL VENTILATION | 126                 | 3 (2.4)               | 3 (2.4)              | 0 (0)                  | <0.0001 | 0.0012 |
| BOSCO INTERFERON INDUCED ANTIVIRAL MODULE             | 76                  | 3 (3.9)               | 3 (3.9)              | 0 (0)                  | <0.0001 | 0.0012 |
| DER IFN ALPHA RESPONSE UP                             | 74                  | 3 (4.1)               | 3 (4.1)              | 0 (0)                  | <0.0001 | 0.0012 |
| DER IFN BETA RESPONSE UP                              | 101                 | 3 (3)                 | 3 (3)                | 0 (0)                  | <0.0001 | 0.0012 |
| DER IFN GAMMA RESPONSE UP                             | 72                  | 3 (4.2)               | 3 (4.2)              | 0 (0)                  | <0.0001 | 0.0012 |
| FLECHNER BIOPSY KIDNEY TRANSPLANT REJECTED VS OK UP   | 85                  | 3 (3.5)               | 3 (3.5)              | 0 (0)                  | <0.0001 | 0.0012 |
| GRANDVAUX IFN RESPONSE NOT VIA IRF3                   | 14                  | 3 (21.4)              | 3 (21.4)             | 0 (0)                  | <0.0001 | 0.0012 |
| ICHIBA GRAFT VERSUS HOST DISEASE 35D UP               | 126                 | 3 (2.4)               | 3 (2.4)              | 0 (0)                  | <0.0001 | 0.0012 |
| LIU VAV3 PROSTATE CARCINOGENESIS UP                   | 85                  | 3 (3.5)               | 3 (3.5)              | 0 (0)                  | <0.0001 | 0.0012 |
| MOSERLE IFNA RESPONSE                                 | 31                  | 3 (9.7)               | 3 (9.7)              | 0 (0)                  | <0.0001 | 0.0012 |
| RADAEVA RESPONSE TO IFNA1 UP                          | 52                  | 3 (5.8)               | 3 (5.8)              | 0 (0)                  | <0.0001 | 0.0012 |
| SEKI INFLAMMATORY RESPONSE LPS UP                     | 77                  | 3 (3.9)               | 3 (3.9)              | 0 (0)                  | <0.0001 | 0.0012 |
| WATANABE ULCERATIVE COLITIS WITH CANCER DN            | 13                  | 3 (23.1)              | 3 (23.1)             | 0 (0)                  | <0.0001 | 0.0012 |
| IIZUKA LIVER CANCER PROGRESSION G1 G2 UP              | 12                  | 2 (16.7)              | 2 (16.7)             | 0 (0)                  | <0.0001 | 0.0012 |
| NUYTTEN NIPP1 TARGETS UP                              | 748                 | 5 (0.7)               | 5 (0.7)              | 0 (0)                  | <0.0001 | 0.002  |
| FULCHER INFLAMMATORY RESPONSE LECTIN VS LPS DN        | 462                 | 4 (0.9)               | 4 (0.9)              | 0 (0)                  | <0.0001 | 0.002  |
| GRUETZMANN PANCREATIC CANCER UP                       | 351                 | 4 (1.1)               | 4 (1.1)              | 0 (0)                  | <0.0001 | 0.002  |
| TAKEDA TARGETS OF NUP98 HOXA9 FUSION 8D UP            | 155                 | 3 (1.9)               | 3 (1.9)              | 0 (0)                  | <0.0001 | 0.002  |
| BOWIE RESPONSE TO EXTRACELLULAR MATRIX                | 17                  | 2 (11.8)              | 2 (11.8)             | 0 (0)                  | <0.0001 | 0.002  |
| YAN ESCAPE FROM ANOIKIS                               | 24                  | 2 (8.3)               | 2 (8.3)              | 0 (0)                  | <0.0001 | 0.002  |
| COLINA TARGETS OF 4EBP1 AND 4EBP2                     | 339                 | 4 (1.2)               | 4 (1.2)              | 0 (0)                  | <0.0001 | 0.0028 |
| RUAN RESPONSE TO TNF UP                               | 12                  | 2 (16.7)              | 2 (16.7)             | 0 (0)                  | <0.0001 | 0.0028 |
| CHICAS RB1 TARGETS CONFLUENT                          | 550                 | 4 (0.7)               | 4 (0.7)              | 0 (0)                  | <0.0001 | 0.0033 |
| KRIEG KDM3A TARGETS NOT HYPOXIA                       | 189                 | 3 (1.6)               | 3 (1.6)              | 0 (0)                  | <0.0001 | 0.0033 |

| Category Name                                      | Category<br>Genes # | Any-reg.<br>SDEG #(%) | Up-reg.<br>SDEG #(%) | Down-reg.<br>SDEG #(%) | P       | FDR    |
|----------------------------------------------------|---------------------|-----------------------|----------------------|------------------------|---------|--------|
| BOWIE RESPONSE TO TAMOXIFEN                        | 18                  | 2 (11.1)              | 2 (11.1)             | 0 (0)                  | <0.0001 | 0.0033 |
| EINAV INTERFERON SIGNATURE IN CANCER               | 27                  | 2 (7.4)               | 2 (7.4)              | 0 (0)                  | <0.0001 | 0.0033 |
| ZHANG INTERFERON RESPONSE                          | 23                  | 2 (8.7)               | 2 (8.7)              | 0 (0)                  | <0.0001 | 0.0033 |
| HAN JNK SINGALING UP                               | 34                  | 2 (5.9)               | 2 (5.9)              | 0 (0)                  | <0.0001 | 0.004  |
| RUAN RESPONSE TO TNF TROGLITAZONE UP               | 17                  | 2 (11.8)              | 2 (11.8)             | 0 (0)                  | <0.0001 | 0.004  |
| WAKABAYASHI ADIPOGENESIS PPARG BOUND 8D            | 658                 | 4 (0.6)               | 4 (0.6)              | 0 (0)                  | <0.0001 | 0.0045 |
| GEISS RESPONSE TO DSRNA UP                         | 35                  | 2 (5.7)               | 2 (5.7)              | 0 (0)                  | <0.0001 | 0.0045 |
| PLASARI TGFB1 TARGETS 10HR DN                      | 233                 | 3 (1.3)               | 3 (1.3)              | 0 (0)                  | <0.0001 | 0.005  |
| RIGGINS TAMOXIFEN RESISTANCE DN                    | 215                 | 3 (1.4)               | 3 (1.4)              | 0 (0)                  | <0.0001 | 0.005  |
| ZHAN MULTIPLE MYELOMA LB DN                        | 39                  | 2 (5.1)               | 2 (5.1)              | 0 (0)                  | <0.0001 | 0.005  |
| GRAESSMANN RESPONSE TO MC AND SERUM DEPRIVATION UP | 203                 | 3 (1.5)               | 3 (1.5)              | 0 (0)                  | <0.0001 | 0.0055 |
| DEBIASI APOPTOSIS BY REOVIRUS INFECTION UP         | 317                 | 3 (0.9)               | 3 (0.9)              | 0 (0)                  | 0.0001  | 0.0091 |
| DURAND STROMA MAX UP                               | 270                 | 3 (1.1)               | 3 (1.1)              | 0 (0)                  | 0.0001  | 0.0091 |
| MIYAGAWA TARGETS OF EWSR1 ETS FUSIONS UP           | 247                 | 3 (1.2)               | 3 (1.2)              | 0 (0)                  | 0.0001  | 0.0091 |

**Table A75:** Significantly enriched MSigDB Chemical/Genetic Perturbation Sets (RNA-Seq, B-cells, Day 1). Results sorted by FDR and #SDEG genes.

| Category Name                           | Category<br>Genes # | Any-reg.<br>SDEG #(%) | Up-reg.<br>SDEG #(%) | Down-reg.<br>SDEG #(%) | P       | FDR    |
|-----------------------------------------|---------------------|-----------------------|----------------------|------------------------|---------|--------|
| Pertussis                               | 70                  | 6 (8.6)               | 6 (8.6)              | 0 (0)                  | <0.0001 | 0.0029 |
| Staphylococcus aureus infection         | 47                  | 5 (10.6)              | 5 (10.6)             | 0 (0)                  | <0.0001 | 0.0029 |
| Complement and coagulation cascades     | 61                  | 5 (8.2)               | 5 (8.2)              | 0 (0)                  | <0.0001 | 0.0029 |
| Herpes simplex infection                | 154                 | 7 (4.5)               | 7 (4.5)              | 0 (0)                  | <0.0001 | 0.0057 |
| Transcriptional misregulation in cancer | 163                 | 7 (4.3)               | 5 (3.1)              | 2 (1.2)                | 0.0002  | 0.0082 |
| Hepatitis C                             | 117                 | 6 (5.1)               | 6 (5.1)              | 0 (0)                  | 0.0001  | 0.0082 |
| Systemic lupus erythematosus            | 106                 | 5 (4.7)               | 5 (4.7)              | 0 (0)                  | 0.0002  | 0.0082 |

**Table A76:** Significantly enriched KEGG Pathways (RNA-Seq, Dendritic cells, Day 1). Results sorted by FDR and #SDEG genes.

| Category Name   | Category<br>Genes # | Any-reg.<br>SDEG #(%) | Up-reg.<br>SDEG #(%) | Down-reg.<br>SDEG #(%) | P       | FDR    |
|-----------------|---------------------|-----------------------|----------------------|------------------------|---------|--------|
| IMMUNE RESPONSE | 231                 | 11 (4.8)              | 9 (3.9)              | 2 (0.9)                | <0.0001 | 0.0082 |

**Table A77:** Significantly enriched MSigDB GO Biological Processes (RNA-Seq, Dendritic cells, Day 1). Results sorted by FDR and #SDEG genes.

| Category Name   | Category | Any-reg.   | Up-reg.    | Down-reg.  | P       | FDR    |
|-----------------|----------|------------|------------|------------|---------|--------|
|                 | Genes #  | SDEG #(% ) | SDEG #(% ) | SDEG #(% ) |         |        |
| MEMBRANE        | 1902     | 31 (1.6)   | 25 (1.3)   | 6 (0.3)    | <0.0001 | 0.0012 |
| PLASMA MEMBRANE | 1358     | 25 (1.8)   | 22 (1.6)   | 3 (0.2)    | <0.0001 | 0.0012 |
| MEMBRANE PART   | 1597     | 25 (1.6)   | 20 (1.3)   | 5 (0.3)    | <0.0001 | 0.0078 |

**Table A78:** Significantly enriched MSigDB GO Cellular Components (RNA-Seq, Dendritic cells, Day 1). Results sorted by FDR and #SDEG genes.

| Category Name         | Category | Any-reg.   | Up-reg.    | Down-reg.  | P       | FDR    |
|-----------------------|----------|------------|------------|------------|---------|--------|
|                       | Genes #  | SDEG #(% ) | SDEG #(% ) | SDEG #(% ) |         |        |
| BIOCARTA COMP PATHWAY | 19       | 4 (21.1)   | 4 (21.1)   | 0 (0)      | <0.0001 | 0.0022 |

**Table A79:** Significantly enriched MSigDB BioCarta Pathways (RNA-Seq, Dendritic cells, Day 1). Results sorted by FDR and #SDEG genes.

| Category Name                                  | Category | Any-reg.   | Up-reg.    | Down-reg.  | P       | FDR    |
|------------------------------------------------|----------|------------|------------|------------|---------|--------|
|                                                | Genes #  | SDEG #(% ) | SDEG #(% ) | SDEG #(% ) |         |        |
| NUYTEN EZH2 TARGETS UP                         | 1002     | 48 (4.8)   | 46 (4.6)   | 2 (0.2)    | <0.0001 | 0.0003 |
| FULCHER INFLAMMATORY RESPONSE LECTIN VS LPS DN | 462      | 39 (8.4)   | 39 (8.4)   | 0 (0)      | <0.0001 | 0.0003 |
| MARKEY RB1 ACUTE LOF UP                        | 214      | 34 (15.9)  | 34 (15.9)  | 0 (0)      | <0.0001 | 0.0003 |
| TAKEDA TARGETS OF NUP98 HOXA9 FUSION 3D UP     | 178      | 33 (18.5)  | 32 (18)    | 1 (0.6)    | <0.0001 | 0.0003 |
| NUYTEN NIPP1 TARGETS UP                        | 748      | 32 (4.3)   | 31 (4.1)   | 1 (0.1)    | <0.0001 | 0.0003 |
| BLALOCK ALZHEIMERS DISEASE UP                  | 1628     | 31 (1.9)   | 24 (1.5)   | 7 (0.4)    | <0.0001 | 0.0003 |
| HECKER IFNB1 TARGETS                           | 92       | 31 (33.7)  | 31 (33.7)  | 0 (0)      | <0.0001 | 0.0003 |
| WALLACE PROSTATE CANCER RACE UP                | 275      | 30 (10.9)  | 28 (10.2)  | 2 (0.7)    | <0.0001 | 0.0003 |
| SANA RESPONSE TO IFNG UP                       | 74       | 29 (39.2)  | 29 (39.2)  | 0 (0)      | <0.0001 | 0.0003 |
| CHEN METABOLIC SYNDROM NETWORK                 | 1172     | 28 (2.4)   | 27 (2.3)   | 1 (0.1)    | <0.0001 | 0.0003 |
| GRAESSMANN APOPTOSIS BY SERUM DEPRIVATION UP   | 541      | 28 (5.2)   | 25 (4.6)   | 3 (0.6)    | <0.0001 | 0.0003 |
| JISON SICKLE CELL DISEASE UP                   | 174      | 28 (16.1)  | 27 (15.5)  | 1 (0.6)    | <0.0001 | 0.0003 |
| TAKEDA TARGETS OF NUP98 HOXA9 FUSION 10D UP    | 186      | 28 (15.1)  | 27 (14.5)  | 1 (0.5)    | <0.0001 | 0.0003 |
| DODD NASOPHARYNGEAL CARCINOMA DN               | 1330     | 27 (2)     | 25 (1.9)   | 2 (0.2)    | <0.0001 | 0.0003 |
| GRAESSMANN APOPTOSIS BY DOXORUBICIN UP         | 1132     | 25 (2.2)   | 23 (2)     | 2 (0.2)    | <0.0001 | 0.0003 |
| ONKEN UVEAL MELANOMA UP                        | 763      | 25 (3.3)   | 22 (2.9)   | 3 (0.4)    | <0.0001 | 0.0003 |
| GOZGIT ESR1 TARGETS DN                         | 741      | 24 (3.2)   | 23 (3.1)   | 1 (0.1)    | <0.0001 | 0.0003 |
| RODWELL AGING KIDNEY UP                        | 465      | 24 (5.2)   | 24 (5.2)   | 0 (0)      | <0.0001 | 0.0003 |
| TAKEDA TARGETS OF NUP98 HOXA9 FUSION 8D UP     | 155      | 24 (15.5)  | 23 (14.8)  | 1 (0.6)    | <0.0001 | 0.0003 |
| BROWNE INTERFERON RESPONSIVE GENES             | 68       | 23 (33.8)  | 23 (33.8)  | 0 (0)      | <0.0001 | 0.0003 |
| FEVR CTNNB1 TARGETS UP                         | 672      | 23 (3.4)   | 21 (3.1)   | 2 (0.3)    | <0.0001 | 0.0003 |
| YOSHIMURA MAPK8 TARGETS UP                     | 1281     | 23 (1.8)   | 19 (1.5)   | 4 (0.3)    | <0.0001 | 0.0003 |
| BOSCO INTERFERON INDUCED ANTIVIRAL MODULE      | 76       | 22 (28.9)  | 22 (28.9)  | 0 (0)      | <0.0001 | 0.0003 |

| Category Name                                         | Category<br>Genes # | Any-reg.<br>SDEG #(%) | Up-reg.<br>SDEG #(%) | Down-reg.<br>SDEG #(%) | P       | FDR    |
|-------------------------------------------------------|---------------------|-----------------------|----------------------|------------------------|---------|--------|
| DEBIASI APOPTOSIS BY REOVIRUS INFECTION UP            | 317                 | 22 (6.9)              | 22 (6.9)             | 0 (0)                  | <0.0001 | 0.0003 |
| GRAESSMANN RESPONSE TO MC AND SERUM DEPRIVATION UP    | 203                 | 22 (10.8)             | 20 (9.9)             | 2 (1)                  | <0.0001 | 0.0003 |
| HELLER SILENCED BY METHYLATION UP                     | 273                 | 22 (8.1)              | 21 (7.7)             | 1 (0.4)                | <0.0001 | 0.0003 |
| ICHIBA GRAFT VERSUS HOST DISEASE D7 UP                | 105                 | 22 (21)               | 22 (21)              | 0 (0)                  | <0.0001 | 0.0003 |
| ALTEMEIER RESPONSE TO LPS WITH MECHANICAL VENTILATION | 126                 | 21 (16.7)             | 20 (15.9)            | 1 (0.8)                | <0.0001 | 0.0003 |
| CHICAS RB1 TARGETS SENESCENT                          | 552                 | 21 (3.8)              | 21 (3.8)             | 0 (0)                  | <0.0001 | 0.0003 |
| TAKEDA TARGETS OF NUP98 HOXA9 FUSION 16D UP           | 169                 | 21 (12.4)             | 21 (12.4)            | 0 (0)                  | <0.0001 | 0.0003 |
| BERTUCCI MEDULLARY VS DUCTAL BREAST CANCER UP         | 200                 | 20 (10)               | 20 (10)              | 0 (0)                  | <0.0001 | 0.0003 |
| CHICAS RB1 TARGETS CONFLUENT                          | 550                 | 20 (3.6)              | 16 (2.9)             | 4 (0.7)                | <0.0001 | 0.0003 |
| MARTENS TRETINOIN RESPONSE UP                         | 816                 | 18 (2.2)              | 15 (1.8)             | 3 (0.4)                | <0.0001 | 0.0003 |
| SMID BREAST CANCER BASAL UP                           | 607                 | 18 (3)                | 14 (2.3)             | 4 (0.7)                | <0.0001 | 0.0003 |
| SMID BREAST CANCER LUMINAL B DN                       | 513                 | 18 (3.5)              | 15 (2.9)             | 3 (0.6)                | <0.0001 | 0.0003 |
| YANG BCL3 TARGETS UP                                  | 351                 | 18 (5.1)              | 17 (4.8)             | 1 (0.3)                | <0.0001 | 0.0003 |
| FOSTER TOLERANT MACROPHAGE DN                         | 405                 | 17 (4.2)              | 15 (3.7)             | 2 (0.5)                | <0.0001 | 0.0003 |
| MOSERLE IFNA RESPONSE                                 | 31                  | 17 (54.8)             | 17 (54.8)            | 0 (0)                  | <0.0001 | 0.0003 |
| RADAEVA RESPONSE TO IFNA1 UP                          | 52                  | 17 (32.7)             | 17 (32.7)            | 0 (0)                  | <0.0001 | 0.0003 |
| RUTELLA RESPONSE TO HGF UP                            | 398                 | 17 (4.3)              | 15 (3.8)             | 2 (0.5)                | <0.0001 | 0.0003 |
| RUTELLA RESPONSE TO HGF VS CSF2RB AND IL4 UP          | 391                 | 17 (4.3)              | 17 (4.3)             | 0 (0)                  | <0.0001 | 0.0003 |
| SPIELMAN LYMPHOBLAST EUROPEAN VS ASIAN DN             | 570                 | 17 (3)                | 17 (3)               | 0 (0)                  | <0.0001 | 0.0003 |
| WIELAND UP BY HBV INFECTION                           | 100                 | 17 (17)               | 17 (17)              | 0 (0)                  | <0.0001 | 0.0003 |
| ZHOU INFLAMMATORY RESPONSE LPS UP                     | 401                 | 17 (4.2)              | 15 (3.7)             | 2 (0.5)                | <0.0001 | 0.0003 |
| COLINA TARGETS OF 4EBP1 AND 4EBP2                     | 339                 | 16 (4.7)              | 16 (4.7)             | 0 (0)                  | <0.0001 | 0.0003 |
| DELYS THYROID CANCER UP                               | 435                 | 16 (3.7)              | 13 (3)               | 3 (0.7)                | <0.0001 | 0.0003 |
| ICHIBA GRAFT VERSUS HOST DISEASE 35D UP               | 126                 | 16 (12.7)             | 16 (12.7)            | 0 (0)                  | <0.0001 | 0.0003 |
| HORIUCHI WTAP TARGETS UP                              | 295                 | 15 (5.1)              | 14 (4.7)             | 1 (0.3)                | <0.0001 | 0.0003 |
| SCHUETZ BREAST CANCER DUCTAL INVASIVE UP              | 338                 | 15 (4.4)              | 14 (4.1)             | 1 (0.3)                | <0.0001 | 0.0003 |
| ZHANG RESPONSE TO IKK INHIBITOR AND TNF UP            | 221                 | 15 (6.8)              | 14 (6.3)             | 1 (0.5)                | <0.0001 | 0.0003 |
| BENNETT SYSTEMIC LUPUS ERYTHEMATOSUS                  | 32                  | 14 (43.8)             | 14 (43.8)            | 0 (0)                  | <0.0001 | 0.0003 |
| BOSCO TH1 CYTOTOXIC MODULE                            | 114                 | 14 (12.3)             | 14 (12.3)            | 0 (0)                  | <0.0001 | 0.0003 |
| CHARAFE BREAST CANCER LUMINAL VS BASAL DN             | 440                 | 14 (3.2)              | 12 (2.7)             | 2 (0.5)                | <0.0001 | 0.0003 |
| DAUER STAT3 TARGETS DN                                | 51                  | 14 (27.5)             | 14 (27.5)            | 0 (0)                  | <0.0001 | 0.0003 |
| DER IFN BETA RESPONSE UP                              | 101                 | 14 (13.9)             | 14 (13.9)            | 0 (0)                  | <0.0001 | 0.0003 |
| MCLACHLAN DENTAL CARIES UP                            | 227                 | 14 (6.2)              | 14 (6.2)             | 0 (0)                  | <0.0001 | 0.0003 |
| RICKMAN METASTASIS DN                                 | 258                 | 14 (5.4)              | 13 (5)               | 1 (0.4)                | <0.0001 | 0.0003 |
| RUTELLA RESPONSE TO CSF2RB AND IL4 UP                 | 319                 | 14 (4.4)              | 12 (3.8)             | 2 (0.6)                | <0.0001 | 0.0003 |
| SEITZ NEOPLASTIC TRANSFORMATION BY 8P DELETION UP     | 69                  | 14 (20.3)             | 13 (18.8)            | 1 (1.4)                | <0.0001 | 0.0003 |
| SMID BREAST CANCER NORMAL LIKE UP                     | 443                 | 14 (3.2)              | 11 (2.5)             | 3 (0.7)                | <0.0001 | 0.0003 |
| SWEET LUNG CANCER KRAS DN                             | 425                 | 14 (3.3)              | 9 (2.1)              | 5 (1.2)                | <0.0001 | 0.0003 |

| Category Name                                        | Category<br>Genes # | Any-reg.<br>SDEG #(%) | Up-reg.<br>SDEG #(%) | Down-reg.<br>SDEG #(%) | P       | FDR    |
|------------------------------------------------------|---------------------|-----------------------|----------------------|------------------------|---------|--------|
| WANG SMARCE1 TARGETS UP                              | 265                 | 14 (5.3)              | 11 (4.2)             | 3 (1.1)                | <0.0001 | 0.0003 |
| DER IFN ALPHA RESPONSE UP                            | 74                  | 13 (17.6)             | 13 (17.6)            | 0 (0)                  | <0.0001 | 0.0003 |
| HIRSCH CELLULAR TRANSFORMATION SIGNATURE UP          | 239                 | 13 (5.4)              | 12 (5)               | 1 (0.4)                | <0.0001 | 0.0003 |
| MCLACHLAN DENTAL CARIES DN                           | 219                 | 13 (5.9)              | 13 (5.9)             | 0 (0)                  | <0.0001 | 0.0003 |
| MIKKELSEN MCV6 LCP WITH H3K4ME3                      | 153                 | 13 (8.5)              | 12 (7.8)             | 1 (0.7)                | <0.0001 | 0.0003 |
| QI PLASMACYTOMA UP                                   | 251                 | 13 (5.2)              | 11 (4.4)             | 2 (0.8)                | <0.0001 | 0.0003 |
| VERHAAK AML WITH NPM1 MUTATED DN                     | 238                 | 13 (5.5)              | 10 (4.2)             | 3 (1.3)                | <0.0001 | 0.0003 |
| BROWN MYELOID CELL DEVELOPMENT UP                    | 159                 | 12 (7.5)              | 10 (6.3)             | 2 (1.3)                | <0.0001 | 0.0003 |
| DURAND STROMA MAX UP                                 | 270                 | 12 (4.4)              | 9 (3.3)              | 3 (1.1)                | <0.0001 | 0.0003 |
| PICCALUGA ANGIOIMMUNOBLASTIC LYMPHOMA UP             | 205                 | 12 (5.9)              | 11 (5.4)             | 1 (0.5)                | <0.0001 | 0.0003 |
| POOLA INVASIVE BREAST CANCER UP                      | 272                 | 12 (4.4)              | 12 (4.4)             | 0 (0)                  | <0.0001 | 0.0003 |
| RIGGINS TAMOXIFEN RESISTANCE DN                      | 215                 | 12 (5.6)              | 12 (5.6)             | 0 (0)                  | <0.0001 | 0.0003 |
| ROZANOV MMP14 TARGETS UP                             | 270                 | 12 (4.4)              | 10 (3.7)             | 2 (0.7)                | <0.0001 | 0.0003 |
| SANA TNF SIGNALING UP                                | 81                  | 12 (14.8)             | 12 (14.8)            | 0 (0)                  | <0.0001 | 0.0003 |
| TORCHIA TARGETS OF EWSR1 FLI1 FUSION DN              | 306                 | 12 (3.9)              | 9 (2.9)              | 3 (1)                  | <0.0001 | 0.0003 |
| VANTVEER BREAST CANCER ESR1 DN                       | 232                 | 12 (5.2)              | 10 (4.3)             | 2 (0.9)                | <0.0001 | 0.0003 |
| VERHAAK AML WITH NPM1 MUTATED UP                     | 190                 | 12 (6.3)              | 12 (6.3)             | 0 (0)                  | <0.0001 | 0.0003 |
| WANG MLL TARGETS                                     | 280                 | 12 (4.3)              | 10 (3.6)             | 2 (0.7)                | <0.0001 | 0.0003 |
| ZHU CMV ALL UP                                       | 121                 | 12 (9.9)              | 12 (9.9)             | 0 (0)                  | <0.0001 | 0.0003 |
| BOWIE RESPONSE TO EXTRACELLULAR MATRIX               | 17                  | 11 (64.7)             | 11 (64.7)            | 0 (0)                  | <0.0001 | 0.0003 |
| BROCKE APOPTOSIS REVERSED BY IL6                     | 144                 | 11 (7.6)              | 11 (7.6)             | 0 (0)                  | <0.0001 | 0.0003 |
| DER IFN GAMMA RESPONSE UP                            | 72                  | 11 (15.3)             | 11 (15.3)            | 0 (0)                  | <0.0001 | 0.0003 |
| FLECHNER BIOPSY KIDNEY TRANSPLANT REJECTED VS OK UP  | 85                  | 11 (12.9)             | 11 (12.9)            | 0 (0)                  | <0.0001 | 0.0003 |
| KRASNOSELSKAYA ILF3 TARGETS UP                       | 37                  | 11 (29.7)             | 11 (29.7)            | 0 (0)                  | <0.0001 | 0.0003 |
| STAMBOLSKY TARGETS OF MUTATED TP53 DN                | 51                  | 11 (21.6)             | 11 (21.6)            | 0 (0)                  | <0.0001 | 0.0003 |
| BOWIE RESPONSE TO TAMOXIFEN                          | 18                  | 10 (55.6)             | 10 (55.6)            | 0 (0)                  | <0.0001 | 0.0003 |
| FARMER BREAST CANCER CLUSTER 1                       | 39                  | 10 (25.6)             | 10 (25.6)            | 0 (0)                  | <0.0001 | 0.0003 |
| FOSTER TOLERANT MACROPHAGE UP                        | 155                 | 10 (6.5)              | 9 (5.8)              | 1 (0.6)                | <0.0001 | 0.0003 |
| LIANG SILENCED BY METHYLATION 2                      | 55                  | 10 (18.2)             | 10 (18.2)            | 0 (0)                  | <0.0001 | 0.0003 |
| TONKS TARGETS OF RUNX1 RUNX1T1 FUSION ERYTHROCYTE UP | 151                 | 10 (6.6)              | 9 (6)                | 1 (0.7)                | <0.0001 | 0.0003 |
| TONKS TARGETS OF RUNX1 RUNX1T1 FUSION MONOCYTE UP    | 201                 | 10 (5)                | 10 (5)               | 0 (0)                  | <0.0001 | 0.0003 |
| CHIARADONNA NEOPLASTIC TRANSFORMATION KRAS DN        | 143                 | 9 (6.3)               | 8 (5.6)              | 1 (0.7)                | <0.0001 | 0.0003 |
| EINAV INTERFERON SIGNATURE IN CANCER                 | 27                  | 9 (33.3)              | 9 (33.3)             | 0 (0)                  | <0.0001 | 0.0003 |
| JOHNSTONE PARVB TARGETS 2 UP                         | 136                 | 9 (6.6)               | 8 (5.9)              | 1 (0.7)                | <0.0001 | 0.0003 |
| KATSANOUE ELAVL1 TARGETS UP                          | 163                 | 9 (5.5)               | 8 (4.9)              | 1 (0.6)                | <0.0001 | 0.0003 |
| KRIEG KDM3A TARGETS NOT HYPOXIA                      | 189                 | 9 (4.8)               | 9 (4.8)              | 0 (0)                  | <0.0001 | 0.0003 |
| MIKKELSEN IPS LCP WITH H3K4ME3                       | 170                 | 9 (5.3)               | 9 (5.3)              | 0 (0)                  | <0.0001 | 0.0003 |
| UROSEVIC RESPONSE TO IMIQUIMOD                       | 23                  | 9 (39.1)              | 9 (39.1)             | 0 (0)                  | <0.0001 | 0.0003 |



| Category Name                                      | Category | Any-reg.  | Up-reg.   | Down-reg. | P       | FDR    |
|----------------------------------------------------|----------|-----------|-----------|-----------|---------|--------|
|                                                    | Genes #  | SDEG #(%) | SDEG #(%) | SDEG #(%) |         |        |
| ZHU CMV 24 HR UP                                   | 93       | 9 (9.7)   | 9 (9.7)   | 0 (0)     | <0.0001 | 0.0003 |
| CHANG IMMORTALIZED BY HPV31 DN                     | 63       | 8 (12.7)  | 7 (11.1)  | 1 (1.6)   | <0.0001 | 0.0003 |
| ELVIDGE HYPOXIA BY DMOG UP                         | 126      | 8 (6.3)   | 7 (5.6)   | 1 (0.8)   | <0.0001 | 0.0003 |
| GRANDVAUX IFN RESPONSE NOT VIA IRF3                | 14       | 8 (57.1)  | 8 (57.1)  | 0 (0)     | <0.0001 | 0.0003 |
| LENAOUR DENDRITIC CELL MATURATION UP               | 112      | 8 (7.1)   | 7 (6.2)   | 1 (0.9)   | <0.0001 | 0.0003 |
| LIU VAV3 PROSTATE CARCINOGENESIS UP                | 85       | 8 (9.4)   | 8 (9.4)   | 0 (0)     | <0.0001 | 0.0003 |
| MISSIAGLIA REGULATED BY METHYLATION UP             | 120      | 8 (6.7)   | 8 (6.7)   | 0 (0)     | <0.0001 | 0.0003 |
| SEKI INFLAMMATORY RESPONSE LPS UP                  | 77       | 8 (10.4)  | 8 (10.4)  | 0 (0)     | <0.0001 | 0.0003 |
| WUNDER INFLAMMATORY RESPONSE AND CHOLESTEROL UP    | 61       | 8 (13.1)  | 8 (13.1)  | 0 (0)     | <0.0001 | 0.0003 |
| XU AKT1 TARGETS 6HR                                | 27       | 8 (29.6)  | 8 (29.6)  | 0 (0)     | <0.0001 | 0.0003 |
| ZHANG INTERFERON RESPONSE                          | 23       | 8 (34.8)  | 8 (34.8)  | 0 (0)     | <0.0001 | 0.0003 |
| ZHU CMV 8 HR UP                                    | 48       | 8 (16.7)  | 8 (16.7)  | 0 (0)     | <0.0001 | 0.0003 |
| CASTELLANO NRAS TARGETS UP                         | 68       | 7 (10.3)  | 7 (10.3)  | 0 (0)     | <0.0001 | 0.0003 |
| HAN JNK SIGNALING UP                               | 34       | 7 (20.6)  | 7 (20.6)  | 0 (0)     | <0.0001 | 0.0003 |
| JACKSON DNMT1 TARGETS UP                           | 76       | 7 (9.2)   | 6 (7.9)   | 1 (1.3)   | <0.0001 | 0.0003 |
| JECHLINGER EPITHELIAL TO MESENCHYMAL TRANSITION UP | 71       | 7 (9.9)   | 7 (9.9)   | 0 (0)     | <0.0001 | 0.0003 |
| KIM RESPONSE TO TSA AND DECITABINE UP              | 120      | 7 (5.8)   | 6 (5)     | 1 (0.8)   | <0.0001 | 0.0003 |
| LEE AGING CEREBELLUM UP                            | 81       | 7 (8.6)   | 7 (8.6)   | 0 (0)     | <0.0001 | 0.0003 |
| LINDSTEDT DENDRITIC CELL MATURATION A              | 67       | 7 (10.4)  | 7 (10.4)  | 0 (0)     | <0.0001 | 0.0003 |
| NAKAYAMA SOFT TISSUE TUMORS PCA1 UP                | 69       | 7 (10.1)  | 7 (10.1)  | 0 (0)     | <0.0001 | 0.0003 |
| TSAI RESPONSE TO RADIATION THERAPY                 | 32       | 7 (21.9)  | 7 (21.9)  | 0 (0)     | <0.0001 | 0.0003 |
| ZHAN MULTIPLE MYELOMA LB DN                        | 39       | 7 (17.9)  | 7 (17.9)  | 0 (0)     | <0.0001 | 0.0003 |
| BECKER TAMOXIFEN RESISTANCE UP                     | 49       | 6 (12.2)  | 6 (12.2)  | 0 (0)     | <0.0001 | 0.0003 |
| BROWNE HCMV INFECTION 4HR UP                       | 53       | 6 (11.3)  | 5 (9.4)   | 1 (1.9)   | <0.0001 | 0.0003 |
| GEISS RESPONSE TO DSRNA UP                         | 35       | 6 (17.1)  | 5 (14.3)  | 1 (2.9)   | <0.0001 | 0.0003 |
| GRANDVAUX IRF3 TARGETS UP                          | 15       | 6 (40)    | 6 (40)    | 0 (0)     | <0.0001 | 0.0003 |
| ROETH TERT TARGETS UP                              | 14       | 6 (42.9)  | 6 (42.9)  | 0 (0)     | <0.0001 | 0.0003 |
| TSAI DNAJB4 TARGETS UP                             | 13       | 6 (46.2)  | 6 (46.2)  | 0 (0)     | <0.0001 | 0.0003 |
| XU HGF TARGETS INDUCED BY AKT1 6HR                 | 18       | 6 (33.3)  | 6 (33.3)  | 0 (0)     | <0.0001 | 0.0003 |
| ZHANG ANTIVIRAL RESPONSE TO RIBAVIRIN UP           | 29       | 6 (20.7)  | 6 (20.7)  | 0 (0)     | <0.0001 | 0.0003 |
| KAAB FAILED HEART VENTRICLE DN                     | 41       | 5 (12.2)  | 5 (12.2)  | 0 (0)     | <0.0001 | 0.0003 |
| KIM LRRC3B TARGETS                                 | 30       | 5 (16.7)  | 5 (16.7)  | 0 (0)     | <0.0001 | 0.0003 |
| PARK TRETINOIN RESPONSE AND PML RARA FUSION        | 29       | 5 (17.2)  | 3 (10.3)  | 2 (6.9)   | <0.0001 | 0.0003 |
| YAN ESCAPE FROM ANOIKIS                            | 24       | 5 (20.8)  | 5 (20.8)  | 0 (0)     | <0.0001 | 0.0003 |
| ZHENG IL22 SIGNALING UP                            | 56       | 5 (8.9)   | 5 (8.9)   | 0 (0)     | <0.0001 | 0.0003 |
| WATANABE ULCERATIVE COLITIS WITH CANCER DN         | 13       | 4 (30.8)  | 4 (30.8)  | 0 (0)     | <0.0001 | 0.0003 |
| BAELDE DIABETIC NEPHROPATHY DN                     | 425      | 13 (3.1)  | 13 (3.1)  | 0 (0)     | <0.0001 | 0.0005 |
| KUMAR TARGETS OF MLL AF9 FUSION                    | 389      | 13 (3.3)  | 12 (3.1)  | 1 (0.3)   | <0.0001 | 0.0005 |

| Category Name                                         | Category<br>Genes # | Any-reg.<br>SDEG #(%) | Up-reg.<br>SDEG #(%) | Down-reg.<br>SDEG #(%) | P       | FDR    |
|-------------------------------------------------------|---------------------|-----------------------|----------------------|------------------------|---------|--------|
| SENGUPTA NASOPHARYNGEAL CARCINOMA WITH LMP1 UP        | 387                 | 13 (3.4)              | 13 (3.4)             | 0 (0)                  | <0.0001 | 0.0005 |
| THUM SYSTOLIC HEART FAILURE UP                        | 404                 | 13 (3.2)              | 12 (3)               | 1 (0.2)                | <0.0001 | 0.0005 |
| BOQUEST STEM CELL CULTURED VS FRESH UP                | 409                 | 12 (2.9)              | 11 (2.7)             | 1 (0.2)                | <0.0001 | 0.0005 |
| DANG REGULATED BY MYC DN                              | 247                 | 10 (4)                | 9 (3.6)              | 1 (0.4)                | <0.0001 | 0.0005 |
| TAKEDA TARGETS OF NUP98 HOXA9 FUSION 10D DN           | 135                 | 8 (5.9)               | 5 (3.7)              | 3 (2.2)                | <0.0001 | 0.0005 |
| LENAOUR DENDRITIC CELL MATURATION DN                  | 139                 | 7 (5)                 | 6 (4.3)              | 1 (0.7)                | <0.0001 | 0.0005 |
| FUJII YBX1 TARGETS UP                                 | 40                  | 5 (12.5)              | 5 (12.5)             | 0 (0)                  | <0.0001 | 0.0005 |
| LEE EARLY T LYMPHOCYTE DN                             | 55                  | 5 (9.1)               | 5 (9.1)              | 0 (0)                  | <0.0001 | 0.0005 |
| STEGER ADIPOGENESIS UP                                | 21                  | 4 (19)                | 3 (14.3)             | 1 (4.8)                | <0.0001 | 0.0005 |
| LEE BMP2 TARGETS UP                                   | 723                 | 18 (2.5)              | 16 (2.2)             | 2 (0.3)                | <0.0001 | 0.0007 |
| KRIEG HYPOXIA NOT VIA KDM3A                           | 718                 | 17 (2.4)              | 14 (1.9)             | 3 (0.4)                | <0.0001 | 0.0007 |
| WIERENGA STAT5A TARGETS DN                            | 219                 | 9 (4.1)               | 7 (3.2)              | 2 (0.9)                | <0.0001 | 0.0007 |
| SERVITJA ISLET HNF1A TARGETS UP                       | 160                 | 8 (5)                 | 8 (5)                | 0 (0)                  | <0.0001 | 0.0007 |
| WANG ESOPHAGUS CANCER VS NORMAL UP                    | 118                 | 7 (5.9)               | 6 (5.1)              | 1 (0.8)                | <0.0001 | 0.0007 |
| GARGALOVIC RESPONSE TO OXIDIZED PHOSPHOLIPIDS GREY DN | 73                  | 6 (8.2)               | 6 (8.2)              | 0 (0)                  | <0.0001 | 0.0007 |
| DAUER STAT3 TARGETS UP                                | 50                  | 5 (10)                | 5 (10)               | 0 (0)                  | <0.0001 | 0.0007 |
| LIAN LIPA TARGETS 3M                                  | 56                  | 5 (8.9)               | 4 (7.1)              | 1 (1.8)                | <0.0001 | 0.0007 |
| NOJIMA SFRP2 TARGETS DN                               | 25                  | 4 (16)                | 4 (16)               | 0 (0)                  | <0.0001 | 0.0007 |
| RUTELLA RESPONSE TO CSF2RB AND IL4 DN                 | 303                 | 11 (3.6)              | 11 (3.6)             | 0 (0)                  | <0.0001 | 0.0008 |
| LU EZH2 TARGETS UP                                    | 289                 | 9 (3.1)               | 9 (3.1)              | 0 (0)                  | <0.0001 | 0.0008 |
| MIYAGAWA TARGETS OF EWSR1 ETS FUSIONS DN              | 219                 | 9 (4.1)               | 5 (2.3)              | 4 (1.8)                | <0.0001 | 0.0008 |
| VERHAAK GLIOBLASTOMA NEURAL                           | 205                 | 9 (4.4)               | 6 (2.9)              | 3 (1.5)                | <0.0001 | 0.0008 |
| WIERENGA STAT5A TARGETS UP                            | 210                 | 9 (4.3)               | 8 (3.8)              | 1 (0.5)                | <0.0001 | 0.0008 |
| SMIRNOV RESPONSE TO IR 6HR DN                         | 113                 | 7 (6.2)               | 6 (5.3)              | 1 (0.9)                | <0.0001 | 0.0008 |
| HESS TARGETS OF HOXA9 AND MEIS1 DN                    | 76                  | 6 (7.9)               | 5 (6.6)              | 1 (1.3)                | <0.0001 | 0.0008 |
| LEE LIVER CANCER MYC TGFA UP                          | 62                  | 5 (8.1)               | 4 (6.5)              | 1 (1.6)                | <0.0001 | 0.0008 |
| BAUS TFF2 TARGETS UP                                  | 32                  | 4 (12.5)              | 4 (12.5)             | 0 (0)                  | <0.0001 | 0.0008 |
| HASEGAWA TUMORIGENESIS BY RET C634R                   | 11                  | 3 (27.3)              | 3 (27.3)             | 0 (0)                  | <0.0001 | 0.0008 |
| LEI MYB TARGETS                                       | 307                 | 10 (3.3)              | 10 (3.3)             | 0 (0)                  | <0.0001 | 0.001  |
| SENGUPTA NASOPHARYNGEAL CARCINOMA UP                  | 287                 | 10 (3.5)              | 10 (3.5)             | 0 (0)                  | <0.0001 | 0.001  |
| ALCALAY AML BY NPM1 LOCALIZATION DN                   | 178                 | 8 (4.5)               | 5 (2.8)              | 3 (1.7)                | <0.0001 | 0.001  |
| TAKEDA TARGETS OF NUP98 HOXA9 FUSION 8D DN            | 193                 | 8 (4.1)               | 5 (2.6)              | 3 (1.6)                | <0.0001 | 0.001  |
| HUANG DASATINIB RESISTANCE UP                         | 79                  | 6 (7.6)               | 4 (5.1)              | 2 (2.5)                | <0.0001 | 0.001  |
| LEE TARGETS OF PTCH1 AND SUFU UP                      | 55                  | 5 (9.1)               | 3 (5.5)              | 2 (3.6)                | <0.0001 | 0.001  |
| WONG ADULT TISSUE STEM MODULE                         | 697                 | 16 (2.3)              | 12 (1.7)             | 4 (0.6)                | <0.0001 | 0.0012 |
| RODWELL AGING KIDNEY NO BLOOD UP                      | 213                 | 9 (4.2)               | 8 (3.8)              | 1 (0.5)                | <0.0001 | 0.0012 |
| MIKKELSEN MEF LCP WITH H3K4ME3                        | 121                 | 7 (5.8)               | 7 (5.8)              | 0 (0)                  | <0.0001 | 0.0012 |
| BOYLAN MULTIPLE MYELOMA PCA1 UP                       | 96                  | 6 (6.2)               | 6 (6.2)              | 0 (0)                  | <0.0001 | 0.0012 |

| Category Name                                       | Category<br>Genes # | Any-reg.<br>SDEG #(%) | Up-reg.<br>SDEG #(%) | Down-reg.<br>SDEG #(%) | P       | FDR    |
|-----------------------------------------------------|---------------------|-----------------------|----------------------|------------------------|---------|--------|
| NEMETH INFLAMMATORY RESPONSE LPS UP                 | 85                  | 6 (7.1)               | 5 (5.9)              | 1 (1.2)                | <0.0001 | 0.0012 |
| DEMAGALHAES AGING UP                                | 56                  | 5 (8.9)               | 5 (8.9)              | 0 (0)                  | <0.0001 | 0.0012 |
| ONDER CDH1 TARGETS 2 DN                             | 454                 | 12 (2.6)              | 10 (2.2)             | 2 (0.4)                | <0.0001 | 0.0013 |
| HELLER HDAC TARGETS DN                              | 281                 | 10 (3.6)              | 9 (3.2)              | 1 (0.4)                | <0.0001 | 0.0013 |
| ELVIDGE HYPOXIA UP                                  | 166                 | 8 (4.8)               | 7 (4.2)              | 1 (0.6)                | <0.0001 | 0.0013 |
| GRAHAM NORMAL QUIESCENT VS NORMAL DIVIDING UP       | 66                  | 5 (7.6)               | 5 (7.6)              | 0 (0)                  | <0.0001 | 0.0013 |
| KANG GIST WITH PDGFRA UP                            | 50                  | 5 (10)                | 5 (10)               | 0 (0)                  | <0.0001 | 0.0013 |
| LEE LIVER CANCER E2F1 UP                            | 62                  | 5 (8.1)               | 5 (8.1)              | 0 (0)                  | <0.0001 | 0.0013 |
| PEREZ TP53 TARGETS                                  | 1124                | 21 (1.9)              | 13 (1.2)             | 8 (0.7)                | <0.0001 | 0.0014 |
| HAN SATB1 TARGETS DN                                | 421                 | 12 (2.9)              | 12 (2.9)             | 0 (0)                  | <0.0001 | 0.0014 |
| ODONNELL TFRC TARGETS UP                            | 409                 | 12 (2.9)              | 12 (2.9)             | 0 (0)                  | <0.0001 | 0.0014 |
| CHANG CORE SERUM RESPONSE DN                        | 205                 | 8 (3.9)               | 7 (3.4)              | 1 (0.5)                | <0.0001 | 0.0014 |
| SARRIO EPITHELIAL MESENCHYMAL TRANSITION DN         | 149                 | 7 (4.7)               | 6 (4)                | 1 (0.7)                | <0.0001 | 0.0014 |
| KRIGE RESPONSE TO TOSEDOSTAT 6HR UP                 | 915                 | 18 (2)                | 18 (2)               | 0 (0)                  | <0.0001 | 0.0018 |
| BEIER GLIOMA STEM CELL DN                           | 63                  | 5 (7.9)               | 4 (6.3)              | 1 (1.6)                | <0.0001 | 0.0018 |
| FURUKAWA DUSP6 TARGETS PCI35 UP                     | 73                  | 5 (6.8)               | 5 (6.8)              | 0 (0)                  | <0.0001 | 0.0018 |
| LIAN LIPA TARGETS 6M                                | 70                  | 5 (7.1)               | 4 (5.7)              | 1 (1.4)                | <0.0001 | 0.0018 |
| RUAN RESPONSE TO TNF UP                             | 12                  | 3 (25)                | 3 (25)               | 0 (0)                  | <0.0001 | 0.0018 |
| DIAZ CHRONIC MEYLOGENOUS LEUKEMIA DN                | 112                 | 6 (5.4)               | 5 (4.5)              | 1 (0.9)                | 0.0001  | 0.0019 |
| LABBE TARGETS OF TGFB1 AND WNT3A DN                 | 106                 | 6 (5.7)               | 6 (5.7)              | 0 (0)                  | 0.0001  | 0.0019 |
| GRUETZMANN PANCREATIC CANCER UP                     | 351                 | 10 (2.8)              | 10 (2.8)             | 0 (0)                  | 0.0001  | 0.0021 |
| FRIDMAN SENESENCE UP                                | 78                  | 5 (6.4)               | 4 (5.1)              | 1 (1.3)                | 0.0001  | 0.0021 |
| WANG SMARCE1 TARGETS DN                             | 340                 | 10 (2.9)              | 10 (2.9)             | 0 (0)                  | 0.0001  | 0.0024 |
| WORSCHTUMOR EVASION AND TOLEROGENICITY DN           | 15                  | 3 (20)                | 2 (13.3)             | 1 (6.7)                | 0.0001  | 0.0024 |
| SHEDDEN LUNG CANCER GOOD SURVIVAL A12               | 280                 | 9 (3.2)               | 8 (2.9)              | 1 (0.4)                | 0.0001  | 0.0025 |
| BROWNE HCMV INFECTION 12HR UP                       | 105                 | 6 (5.7)               | 6 (5.7)              | 0 (0)                  | 0.0001  | 0.0025 |
| CHEBOTAEV GR TARGETS DN                             | 114                 | 6 (5.3)               | 5 (4.4)              | 1 (0.9)                | 0.0001  | 0.0025 |
| GENTILE UV LOW DOSE DN                              | 64                  | 5 (7.8)               | 2 (3.1)              | 3 (4.7)                | 0.0001  | 0.0025 |
| ZWANG TRANSIENTLY UP BY 1ST EGF PULSE ONLY          | 1723                | 26 (1.5)              | 20 (1.2)             | 6 (0.3)                | 0.0002  | 0.0026 |
| FOSTER KDM1A TARGETS UP                             | 250                 | 8 (3.2)               | 8 (3.2)              | 0 (0)                  | 0.0002  | 0.0026 |
| RUIZ TNC TARGETS UP                                 | 149                 | 7 (4.7)               | 5 (3.4)              | 2 (1.3)                | 0.0002  | 0.0026 |
| AMIT EGF RESPONSE 40 HELA                           | 42                  | 4 (9.5)               | 4 (9.5)              | 0 (0)                  | 0.0002  | 0.0026 |
| SATO SILENCED BY DEACETYLATION IN PANCREATIC CANCER | 43                  | 4 (9.3)               | 2 (4.7)              | 2 (4.7)                | 0.0002  | 0.0026 |
| MONNIER POSTRADIATION TUMOR ESCAPE DN               | 357                 | 10 (2.8)              | 10 (2.8)             | 0 (0)                  | 0.0002  | 0.0027 |
| JI RESPONSE TO FSH UP                               | 85                  | 5 (5.9)               | 5 (5.9)              | 0 (0)                  | 0.0002  | 0.0027 |
| XU RESPONSE TO TRETINOIN AND NSC682994 UP           | 16                  | 3 (18.8)              | 3 (18.8)             | 0 (0)                  | 0.0002  | 0.0027 |
| RASHI RESPONSE TO IONIZING RADIATION 6              | 79                  | 5 (6.3)               | 4 (5.1)              | 1 (1.3)                | 0.0002  | 0.0029 |
| SANSOM APC TARGETS DN                               | 359                 | 10 (2.8)              | 9 (2.5)              | 1 (0.3)                | 0.0002  | 0.0031 |

| Category Name                                     | Category<br>Genes # | Any-reg.<br>SDEG #(%) | Up-reg.<br>SDEG #(%) | Down-reg.<br>SDEG #(%) | P      | FDR    |
|---------------------------------------------------|---------------------|-----------------------|----------------------|------------------------|--------|--------|
| LI INDUCED T TO NATURAL KILLER UP                 | 302                 | 9 (3)                 | 9 (3)                | 0 (0)                  | 0.0002 | 0.0031 |
| GAL LEUKEMIC STEM CELL DN                         | 244                 | 8 (3.3)               | 8 (3.3)              | 0 (0)                  | 0.0002 | 0.0031 |
| KHETCHOUMIAN TRIM24 TARGETS UP                    | 45                  | 4 (8.9)               | 4 (8.9)              | 0 (0)                  | 0.0002 | 0.0031 |
| MAHADEVAN IMATINIB RESISTANCE UP                  | 17                  | 3 (17.6)              | 1 (5.9)              | 2 (11.8)               | 0.0002 | 0.0031 |
| MEISSNER BRAIN HCP WITH H3K4ME3 AND H3K27ME3      | 1060                | 19 (1.8)              | 15 (1.4)             | 4 (0.4)                | 0.0002 | 0.0033 |
| RUTELLA RESPONSE TO HGF DN                        | 224                 | 8 (3.6)               | 8 (3.6)              | 0 (0)                  | 0.0002 | 0.0033 |
| LEE RECENT THYMIC EMIGRANT                        | 217                 | 8 (3.7)               | 8 (3.7)              | 0 (0)                  | 0.0002 | 0.0034 |
| SASAKI ADULT T CELL LEUKEMIA                      | 186                 | 7 (3.8)               | 6 (3.2)              | 1 (0.5)                | 0.0002 | 0.0034 |
| BASSO HAIRY CELL LEUKEMIA DN                      | 79                  | 5 (6.3)               | 2 (2.5)              | 3 (3.8)                | 0.0002 | 0.0034 |
| OSWALD HEMATOPOIETIC STEM CELL IN COLLAGEN GEL UP | 227                 | 8 (3.5)               | 6 (2.6)              | 2 (0.9)                | 0.0002 | 0.0035 |
| LEONARD HYPOXIA                                   | 46                  | 4 (8.7)               | 4 (8.7)              | 0 (0)                  | 0.0002 | 0.0035 |
| ZHAN MULTIPLE MYELOMA SPIKED                      | 22                  | 3 (13.6)              | 3 (13.6)             | 0 (0)                  | 0.0002 | 0.0035 |
| KIM GLIS2 TARGETS UP                              | 84                  | 5 (6)                 | 5 (6)                | 0 (0)                  | 0.0002 | 0.0036 |
| MASSARWEH TAMOXIFEN RESISTANCE UP                 | 561                 | 13 (2.3)              | 9 (1.6)              | 4 (0.7)                | 0.0002 | 0.0037 |
| BOYLAN MULTIPLE MYELOMA C D DN                    | 244                 | 8 (3.3)               | 8 (3.3)              | 0 (0)                  | 0.0002 | 0.0037 |
| RUTELLA RESPONSE TO HGF VS CSF2RB AND IL4 DN      | 231                 | 8 (3.5)               | 6 (2.6)              | 2 (0.9)                | 0.0002 | 0.0037 |
| MAHADEVAN RESPONSE TO MP470 UP                    | 19                  | 3 (15.8)              | 3 (15.8)             | 0 (0)                  | 0.0002 | 0.0037 |
| RUAN RESPONSE TO TNF TROGLITAZONE UP              | 17                  | 3 (17.6)              | 3 (17.6)             | 0 (0)                  | 0.0003 | 0.0038 |
| PHONG TNF RESPONSE NOT VIA P38                    | 333                 | 10 (3)                | 9 (2.7)              | 1 (0.3)                | 0.0003 | 0.004  |
| JIANG HYPOXIA NORMAL                              | 300                 | 9 (3)                 | 7 (2.3)              | 2 (0.7)                | 0.0003 | 0.0041 |
| NIELSEN SYNOVIAL SARCOMA DN                       | 19                  | 3 (15.8)              | 3 (15.8)             | 0 (0)                  | 0.0003 | 0.0041 |
| AMIT EGF RESPONSE 60 HELA                         | 45                  | 4 (8.9)               | 4 (8.9)              | 0 (0)                  | 0.0003 | 0.0043 |
| OSADA ASCL1 TARGETS UP                            | 45                  | 4 (8.9)               | 4 (8.9)              | 0 (0)                  | 0.0003 | 0.0043 |
| JOHNSTONE PARVB TARGETS 3 UP                      | 425                 | 11 (2.6)              | 11 (2.6)             | 0 (0)                  | 0.0003 | 0.0044 |
| HINATA NFKB TARGETS KERATINOCYTE UP               | 91                  | 5 (5.5)               | 4 (4.4)              | 1 (1.1)                | 0.0003 | 0.0044 |
| YAMASHITA METHYLATED IN PROSTATE CANCER           | 53                  | 4 (7.5)               | 4 (7.5)              | 0 (0)                  | 0.0003 | 0.0044 |
| CROONQUIST IL6 DEPRIVATION UP                     | 20                  | 3 (15)                | 3 (15)               | 0 (0)                  | 0.0003 | 0.0045 |
| SARTIPY BLUNTED BY INSULIN RESISTANCE UP          | 19                  | 3 (15.8)              | 3 (15.8)             | 0 (0)                  | 0.0003 | 0.0047 |
| PLASARI TGFB1 TARGETS 10HR DN                     | 233                 | 8 (3.4)               | 8 (3.4)              | 0 (0)                  | 0.0003 | 0.0049 |
| KRIGE RESPONSE TO TOSEDOSTAT 24HR UP              | 740                 | 15 (2)                | 15 (2)               | 0 (0)                  | 0.0004 | 0.005  |
| PROVENZANI METASTASIS DN                          | 133                 | 6 (4.5)               | 5 (3.8)              | 1 (0.8)                | 0.0004 | 0.0051 |
| PELLICCIOTTA HDAC IN ANTIGEN PRESENTATION DN      | 51                  | 4 (7.8)               | 4 (7.8)              | 0 (0)                  | 0.0004 | 0.0051 |
| ZHENG GLIOBLASTOMA PLASTICITY UP                  | 252                 | 8 (3.2)               | 6 (2.4)              | 2 (0.8)                | 0.0004 | 0.0054 |
| CHIANG LIVER CANCER SUBCLASS INTERFERON UP        | 24                  | 3 (12.5)              | 3 (12.5)             | 0 (0)                  | 0.0004 | 0.0056 |
| WIERENGA STAT5A TARGETS GROUP1                    | 130                 | 6 (4.6)               | 5 (3.8)              | 1 (0.8)                | 0.0004 | 0.0058 |
| KOYAMA SEMA3B TARGETS DN                          | 394                 | 10 (2.5)              | 7 (1.8)              | 3 (0.8)                | 0.0004 | 0.0059 |
| BROWNE HCMV INFECTION 48HR DN                     | 477                 | 11 (2.3)              | 8 (1.7)              | 3 (0.6)                | 0.0004 | 0.006  |
| HUANG GATA2 TARGETS UP                            | 146                 | 6 (4.1)               | 5 (3.4)              | 1 (0.7)                | 0.0005 | 0.0062 |

| Category Name                                          | Category | Any-reg.  | Up-reg.   | Down-reg. | P      | FDR    |
|--------------------------------------------------------|----------|-----------|-----------|-----------|--------|--------|
|                                                        | Genes #  | SDEG #(%) | SDEG #(%) | SDEG #(%) |        |        |
| ZHANG TARGETS OF EWSR1 FLI1 FUSION                     | 84       | 5 (6)     | 4 (4.8)   | 1 (1.2)   | 0.0005 | 0.0062 |
| BROWNE HCMV INFECTION 30MIN UP                         | 51       | 4 (7.8)   | 4 (7.8)   | 0 (0)     | 0.0005 | 0.0066 |
| MCBRYAN PUBERTAL BREAST 4 5WK UP                       | 264      | 8 (3)     | 6 (2.3)   | 2 (0.8)   | 0.0005 | 0.0067 |
| VART KSHV INFECTION ANGIOGENIC MARKERS DN              | 137      | 6 (4.4)   | 3 (2.2)   | 3 (2.2)   | 0.0005 | 0.0067 |
| TSAI RESPONSE TO IONIZING RADIATION                    | 146      | 6 (4.1)   | 6 (4.1)   | 0 (0)     | 0.0005 | 0.0069 |
| JAATINEN HEMATOPOIETIC STEM CELL DN                    | 221      | 7 (3.2)   | 5 (2.3)   | 2 (0.9)   | 0.0005 | 0.007  |
| FULCHER INFLAMMATORY RESPONSE LECTIN VS LPS UP         | 564      | 12 (2.1)  | 9 (1.6)   | 3 (0.5)   | 0.0005 | 0.0071 |
| KEEN RESPONSE TO ROSIGLITAZONE DN                      | 106      | 5 (4.7)   | 4 (3.8)   | 1 (0.9)   | 0.0005 | 0.0072 |
| MURATA VIRULENCE OF H PILORI                           | 23       | 3 (13)    | 3 (13)    | 0 (0)     | 0.0005 | 0.0072 |
| GYORFFY DOXORUBICIN RESISTANCE                         | 53       | 4 (7.5)   | 3 (5.7)   | 1 (1.9)   | 0.0006 | 0.0073 |
| LEE LIVER CANCER MYC E2F1 UP                           | 56       | 4 (7.1)   | 4 (7.1)   | 0 (0)     | 0.0006 | 0.0075 |
| ZWANG TRANSIENTLY UP BY 2ND EGF PULSE ONLY             | 1568     | 22 (1.4)  | 17 (1.1)  | 5 (0.3)   | 0.0006 | 0.0076 |
| BASSO CD40 SIGNALING UP                                | 99       | 5 (5.1)   | 5 (5.1)   | 0 (0)     | 0.0006 | 0.0076 |
| ACEVEDO FGFR1 TARGETS IN PROSTATE CANCER MODEL UP      | 278      | 8 (2.9)   | 8 (2.9)   | 0 (0)     | 0.0006 | 0.0077 |
| DACOSTA UV RESPONSE VIA ERCC3 UP                       | 301      | 8 (2.7)   | 5 (1.7)   | 3 (1)     | 0.0006 | 0.008  |
| DIRMEIER LMP1 RESPONSE LATE DN                         | 30       | 3 (10)    | 3 (10)    | 0 (0)     | 0.0006 | 0.0083 |
| GAURNIER PSMD4 TARGETS                                 | 68       | 4 (5.9)   | 3 (4.4)   | 1 (1.5)   | 0.0007 | 0.0083 |
| WEST ADRENOCORTICAL CARCINOMA VS ADENOMA DN            | 24       | 3 (12.5)  | 3 (12.5)  | 0 (0)     | 0.0007 | 0.0083 |
| BOYALT LIVER CANCER SUBCLASS G5 DN                     | 27       | 3 (11.1)  | 3 (11.1)  | 0 (0)     | 0.0007 | 0.0084 |
| LIM MAMMARY STEM CELL DN                               | 422      | 10 (2.4)  | 9 (2.1)   | 1 (0.2)   | 0.0007 | 0.0087 |
| GAVIN FOXP3 TARGETS CLUSTER P4                         | 99       | 5 (5.1)   | 2 (2)     | 3 (3)     | 0.0007 | 0.0091 |
| SHAFFER IRF4 TARGETS IN MYELOMA VS MATURE B LYMPHOCYTE | 97       | 5 (5.2)   | 5 (5.2)   | 0 (0)     | 0.0007 | 0.0091 |
| MARTINEZ RB1 AND TP53 TARGETS UP                       | 582      | 12 (2.1)  | 10 (1.7)  | 2 (0.3)   | 0.0007 | 0.0093 |
| OLSSON E2F3 TARGETS UP                                 | 28       | 3 (10.7)  | 3 (10.7)  | 0 (0)     | 0.0008 | 0.0095 |
| YAMASHITA SILENCED BY METHYLATION                      | 7        | 2 (28.6)  | 2 (28.6)  | 0 (0)     | 0.0008 | 0.0095 |
| SHARMA PILOCYTIC ASTROCYTOMA LOCATION UP               | 25       | 3 (12)    | 3 (12)    | 0 (0)     | 0.0008 | 0.0099 |

**Table A80:** Significantly enriched MSigDB Chemical/Genetic Perturbation Sets (RNA-Seq, Dendritic cells, Day 1). Results sorted by FDR and #SDEG genes.

| Category Name                                  | Category | Any-reg.  | Up-reg.   | Down-reg. | P       | FDR    |
|------------------------------------------------|----------|-----------|-----------|-----------|---------|--------|
|                                                | Genes #  | SDEG #(%) | SDEG #(%) | SDEG #(%) |         |        |
| FULCHER INFLAMMATORY RESPONSE LECTIN VS LPS DN | 462      | 7 (1.5)   | 7 (1.5)   | 0 (0)     | <0.0001 | 0.0068 |
| MARKEY RB1 ACUTE LOF UP                        | 214      | 4 (1.9)   | 4 (1.9)   | 0 (0)     | <0.0001 | 0.0068 |
| VERHAAK AML WITH NPM1 MUTATED UP               | 190      | 4 (2.1)   | 4 (2.1)   | 0 (0)     | <0.0001 | 0.0068 |
| IWANAGA CARCINOGENESIS BY KRAS PTEN UP         | 167      | 3 (1.8)   | 3 (1.8)   | 0 (0)     | <0.0001 | 0.0068 |
| KATSANOUE ELAVL1 TARGETS UP                    | 163      | 3 (1.8)   | 3 (1.8)   | 0 (0)     | <0.0001 | 0.0068 |

**Table A81:** Significantly enriched MSigDB Chemical/Genetic Perturbation Sets (RNA-Seq, Dendritic cells, Day 3). Results sorted by FDR and #SDEG genes.

| Category Name                       | Category<br>Genes # | Any-reg.<br>SDEG #(%) | Up-reg.<br>SDEG #(%) | Down-reg.<br>SDEG #(%) | P       | FDR    |
|-------------------------------------|---------------------|-----------------------|----------------------|------------------------|---------|--------|
| Influenza A                         | 149                 | 14 (9.4)              | 14 (9.4)             | 0 (0)                  | <0.0001 | 0.001  |
| Herpes simplex infection            | 154                 | 12 (7.8)              | 12 (7.8)             | 0 (0)                  | <0.0001 | 0.001  |
| Measles                             | 115                 | 10 (8.7)              | 10 (8.7)             | 0 (0)                  | <0.0001 | 0.001  |
| Staphylococcus aureus infection     | 47                  | 6 (12.8)              | 6 (12.8)             | 0 (0)                  | <0.0001 | 0.0021 |
| Hepatitis C                         | 117                 | 8 (6.8)               | 8 (6.8)              | 0 (0)                  | <0.0001 | 0.0048 |
| Antigen processing and presentation | 64                  | 6 (9.4)               | 6 (9.4)              | 0 (0)                  | <0.0001 | 0.0048 |
| Osteoclast differentiation          | 113                 | 8 (7.1)               | 7 (6.2)              | 1 (0.9)                | 0.0001  | 0.005  |
| Phagosome                           | 131                 | 8 (6.1)               | 7 (5.3)              | 1 (0.8)                | 0.0001  | 0.005  |
| Hematopoietic cell lineage          | 74                  | 6 (8.1)               | 2 (2.7)              | 4 (5.4)                | 0.0002  | 0.006  |

**Table A82:** Significantly enriched KEGG Pathways (RNA-Seq, Monocytes, Day 1). Results sorted by FDR and #SDEG genes.

| Category Name                             | Category<br>Genes # | Any-reg.<br>SDEG #(%) | Up-reg.<br>SDEG #(%) | Down-reg.<br>SDEG #(%) | P       | FDR    |
|-------------------------------------------|---------------------|-----------------------|----------------------|------------------------|---------|--------|
| SIGNAL TRANSDUCTION                       | 1580                | 44 (2.8)              | 32 (2)               | 12 (0.8)               | <0.0001 | 0.0007 |
| SYSTEM PROCESS                            | 527                 | 23 (4.4)              | 12 (2.3)             | 11 (2.1)               | <0.0001 | 0.0007 |
| IMMUNE SYSTEM PROCESS                     | 324                 | 22 (6.8)              | 18 (5.6)             | 4 (1.2)                | <0.0001 | 0.0007 |
| CELL PROLIFERATION GO 0008283             | 493                 | 21 (4.3)              | 15 (3)               | 6 (1.2)                | <0.0001 | 0.0007 |
| DEFENSE RESPONSE                          | 262                 | 18 (6.9)              | 15 (5.7)             | 3 (1.1)                | <0.0001 | 0.0007 |
| REGULATION OF DEVELOPMENTAL PROCESS       | 434                 | 18 (4.1)              | 12 (2.8)             | 6 (1.4)                | <0.0001 | 0.0007 |
| IMMUNE RESPONSE                           | 231                 | 17 (7.4)              | 16 (6.9)             | 1 (0.4)                | <0.0001 | 0.0007 |
| MULTI ORGANISM PROCESS                    | 157                 | 11 (7)                | 10 (6.4)             | 1 (0.6)                | <0.0001 | 0.0007 |
| MEMBRANE ORGANIZATION AND BIOGENESIS      | 135                 | 10 (7.4)              | 5 (3.7)              | 5 (3.7)                | <0.0001 | 0.0007 |
| RESPONSE TO BIOTIC STIMULUS               | 117                 | 9 (7.7)               | 8 (6.8)              | 1 (0.9)                | <0.0001 | 0.0007 |
| RESPONSE TO OTHER ORGANISM                | 79                  | 8 (10.1)              | 7 (8.9)              | 1 (1.3)                | <0.0001 | 0.0007 |
| RESPONSE TO VIRUS                         | 47                  | 7 (14.9)              | 7 (14.9)             | 0 (0)                  | <0.0001 | 0.0007 |
| JAK STAT CASCADE                          | 31                  | 6 (19.4)              | 6 (19.4)             | 0 (0)                  | <0.0001 | 0.0013 |
| REGULATION OF PROGRAMMED CELL DEATH       | 339                 | 14 (4.1)              | 11 (3.2)             | 3 (0.9)                | <0.0001 | 0.0024 |
| PHAGOCYTOSIS                              | 18                  | 4 (22.2)              | 2 (11.1)             | 2 (11.1)               | <0.0001 | 0.0033 |
| RESPONSE TO WOUNDING                      | 185                 | 10 (5.4)              | 9 (4.9)              | 1 (0.5)                | <0.0001 | 0.0034 |
| INFLAMMATORY RESPONSE                     | 129                 | 8 (6.2)               | 7 (5.4)              | 1 (0.8)                | <0.0001 | 0.0034 |
| POSITIVE REGULATION OF BIOLOGICAL PROCESS | 690                 | 22 (3.2)              | 16 (2.3)             | 6 (0.9)                | <0.0001 | 0.0046 |
| POSITIVE REGULATION OF CELLULAR PROCESS   | 652                 | 21 (3.2)              | 15 (2.3)             | 6 (0.9)                | 0.0001  | 0.0052 |
| PROTEIN METABOLIC PROCESS                 | 1185                | 31 (2.6)              | 22 (1.9)             | 9 (0.8)                | 0.0001  | 0.0054 |
| PROGRAMMED CELL DEATH                     | 429                 | 15 (3.5)              | 12 (2.8)             | 3 (0.7)                | 0.0002  | 0.0071 |
| CELL DEVELOPMENT                          | 571                 | 18 (3.2)              | 13 (2.3)             | 5 (0.9)                | 0.0002  | 0.0079 |
| REGULATION OF APOPTOSIS                   | 338                 | 13 (3.8)              | 10 (3)               | 3 (0.9)                | 0.0002  | 0.0079 |
| DEFENSE RESPONSE TO VIRUS                 | 10                  | 3 (30)                | 3 (30)               | 0 (0)                  | 0.0002  | 0.0079 |

| Category Name | Category | Any-reg.   | Up-reg.    | Down-reg.  | P | FDR |
|---------------|----------|------------|------------|------------|---|-----|
|               | Genes #  | SDEG #(% ) | SDEG #(% ) | SDEG #(% ) |   |     |

**Table A83:** Significantly enriched MSigDB GO Biological Processes (RNA-Seq, Monocytes, Day 1). Results sorted by FDR and #SDEG genes.

| Category Name | Category | Any-reg.   | Up-reg.    | Down-reg.  | P       | FDR    |
|---------------|----------|------------|------------|------------|---------|--------|
|               | Genes #  | SDEG #(% ) | SDEG #(% ) | SDEG #(% ) |         |        |
| MEMBRANE      | 1902     | 49 (2.6)   | 32 (1.7)   | 17 (0.9)   | <0.0001 | 0.0023 |

**Table A84:** Significantly enriched MSigDB GO Cellular Components (RNA-Seq, Monocytes, Day 1). Results sorted by FDR and #SDEG genes.

| Category Name                                                        | Category | Any-reg.   | Up-reg.    | Down-reg.  | P       | FDR    |
|----------------------------------------------------------------------|----------|------------|------------|------------|---------|--------|
|                                                                      | Genes #  | SDEG #(% ) | SDEG #(% ) | SDEG #(% ) |         |        |
| RECEPTOR ACTIVITY                                                    | 554      | 20 (3.6)   | 11 (2)     | 9 (1.6)    | <0.0001 | 0.0053 |
| TRANSMEMBRANE RECEPTOR ACTIVITY                                      | 398      | 16 (4)     | 9 (2.3)    | 7 (1.8)    | <0.0001 | 0.0053 |
| HEMATOPOIETIN INTERFERON CLASSD200 DOMAIN CYTOKINE RECEPTOR ACTIVITY | 29       | 5 (17.2)   | 3 (10.3)   | 2 (6.9)    | <0.0001 | 0.0053 |

**Table A85:** Significantly enriched MSigDB GO Molecular Functions (RNA-Seq, Monocytes, Day 1). Results sorted by FDR and #SDEG genes.

| Category Name           | Category | Any-reg.   | Up-reg.    | Down-reg.  | P       | FDR    |
|-------------------------|----------|------------|------------|------------|---------|--------|
|                         | Genes #  | SDEG #(% ) | SDEG #(% ) | SDEG #(% ) |         |        |
| BIOCARTA IL22BP PATHWAY | 16       | 4 (25)     | 4 (25)     | 0 (0)      | <0.0001 | 0.0087 |

**Table A86:** Significantly enriched MSigDB BioCarta Pathways (RNA-Seq, Monocytes, Day 1). Results sorted by FDR and #SDEG genes.

| Category Name                                  | Category | Any-reg.   | Up-reg.    | Down-reg.  | P       | FDR    |
|------------------------------------------------|----------|------------|------------|------------|---------|--------|
|                                                | Genes #  | SDEG #(% ) | SDEG #(% ) | SDEG #(% ) |         |        |
| NUYTEN EZH2 TARGETS UP                         | 1002     | 70 (7)     | 66 (6.6)   | 4 (0.4)    | <0.0001 | 0.0002 |
| FULCHER INFLAMMATORY RESPONSE LECTIN VS LPS DN | 462      | 64 (13.9)  | 63 (13.6)  | 1 (0.2)    | <0.0001 | 0.0002 |
| NUYTEN NIPP1 TARGETS UP                        | 748      | 49 (6.6)   | 46 (6.1)   | 3 (0.4)    | <0.0001 | 0.0002 |
| BLALOCK ALZHEIMERS DISEASE UP                  | 1628     | 47 (2.9)   | 39 (2.4)   | 8 (0.5)    | <0.0001 | 0.0002 |
| GRAESSMANN APOPTOSIS BY DOXORUBICIN UP         | 1132     | 43 (3.8)   | 38 (3.4)   | 5 (0.4)    | <0.0001 | 0.0002 |
| HECKER IFNB1 TARGETS                           | 92       | 43 (46.7)  | 42 (45.7)  | 1 (1.1)    | <0.0001 | 0.0002 |
| CHEN METABOLIC SYNDROM NETWORK                 | 1172     | 41 (3.5)   | 28 (2.4)   | 13 (1.1)   | <0.0001 | 0.0002 |
| TAKEDA TARGETS OF NUP98 HOXA9 FUSION 3D UP     | 178      | 41 (23)    | 39 (21.9)  | 2 (1.1)    | <0.0001 | 0.0002 |
| GRAESSMANN APOPTOSIS BY SERUM DEPRIVATION UP   | 541      | 40 (7.4)   | 33 (6.1)   | 7 (1.3)    | <0.0001 | 0.0002 |
| GOZGIT ESR1 TARGETS DN                         | 741      | 39 (5.3)   | 30 (4)     | 9 (1.2)    | <0.0001 | 0.0002 |
| WALLACE PROSTATE CANCER RACE UP                | 275      | 39 (14.2)  | 34 (12.4)  | 5 (1.8)    | <0.0001 | 0.0002 |

| Category Name                                         | Category<br>Genes # | Any-reg.<br>SDEG #(%) | Up-reg.<br>SDEG #(%) | Down-reg.<br>SDEG #(%) | P       | FDR    |
|-------------------------------------------------------|---------------------|-----------------------|----------------------|------------------------|---------|--------|
| CHICAS RB1 TARGETS CONFLUENT                          | 550                 | 38 (6.9)              | 27 (4.9)             | 11 (2)                 | <0.0001 | 0.0002 |
| TAKEDA TARGETS OF NUP98 HOXA9 FUSION 10D UP           | 186                 | 38 (20.4)             | 32 (17.2)            | 6 (3.2)                | <0.0001 | 0.0002 |
| PEREZ TP53 TARGETS                                    | 1124                | 37 (3.3)              | 24 (2.1)             | 13 (1.2)               | <0.0001 | 0.0002 |
| CHICAS RB1 TARGETS SENESCENT                          | 552                 | 36 (6.5)              | 31 (5.6)             | 5 (0.9)                | <0.0001 | 0.0002 |
| BOSCO INTERFERON INDUCED ANTIVIRAL MODULE             | 76                  | 34 (44.7)             | 34 (44.7)            | 0 (0)                  | <0.0001 | 0.0002 |
| BROWNE INTERFERON RESPONSIVE GENES                    | 68                  | 34 (50)               | 34 (50)              | 0 (0)                  | <0.0001 | 0.0002 |
| FEVR CTNNB1 TARGETS UP                                | 672                 | 34 (5.1)              | 29 (4.3)             | 5 (0.7)                | <0.0001 | 0.0002 |
| MARKEY RB1 ACUTE LOF UP                               | 214                 | 34 (15.9)             | 32 (15)              | 2 (0.9)                | <0.0001 | 0.0002 |
| FOSTER TOLERANT MACROPHAGE DN                         | 405                 | 33 (8.1)              | 29 (7.2)             | 4 (1)                  | <0.0001 | 0.0002 |
| ZHOU INFLAMMATORY RESPONSE LPS UP                     | 401                 | 33 (8.2)              | 27 (6.7)             | 6 (1.5)                | <0.0001 | 0.0002 |
| JISON SICKLE CELL DISEASE UP                          | 174                 | 32 (18.4)             | 30 (17.2)            | 2 (1.1)                | <0.0001 | 0.0002 |
| LEE BMP2 TARGETS UP                                   | 723                 | 32 (4.4)              | 21 (2.9)             | 11 (1.5)               | <0.0001 | 0.0002 |
| SANA RESPONSE TO IFNG UP                              | 74                  | 32 (43.2)             | 32 (43.2)            | 0 (0)                  | <0.0001 | 0.0002 |
| ONKEN UVEAL MELANOMA UP                               | 763                 | 31 (4.1)              | 26 (3.4)             | 5 (0.7)                | <0.0001 | 0.0002 |
| YANG BCL3 TARGETS UP                                  | 351                 | 31 (8.8)              | 26 (7.4)             | 5 (1.4)                | <0.0001 | 0.0002 |
| GRAESSMANN RESPONSE TO MC AND SERUM DEPRIVATION UP    | 203                 | 30 (14.8)             | 27 (13.3)            | 3 (1.5)                | <0.0001 | 0.0002 |
| HELLER SILENCED BY METHYLATION UP                     | 273                 | 30 (11)               | 27 (9.9)             | 3 (1.1)                | <0.0001 | 0.0002 |
| TAKEDA TARGETS OF NUP98 HOXA9 FUSION 16D UP           | 169                 | 30 (17.8)             | 25 (14.8)            | 5 (3)                  | <0.0001 | 0.0002 |
| RODWELL AGING KIDNEY UP                               | 465                 | 29 (6.2)              | 27 (5.8)             | 2 (0.4)                | <0.0001 | 0.0002 |
| SMID BREAST CANCER LUMINAL B DN                       | 513                 | 29 (5.7)              | 22 (4.3)             | 7 (1.4)                | <0.0001 | 0.0002 |
| SMID BREAST CANCER NORMAL LIKE UP                     | 443                 | 29 (6.5)              | 20 (4.5)             | 9 (2)                  | <0.0001 | 0.0002 |
| TAKEDA TARGETS OF NUP98 HOXA9 FUSION 8D UP            | 155                 | 29 (18.7)             | 26 (16.8)            | 3 (1.9)                | <0.0001 | 0.0002 |
| BERTUCCI MEDULLARY VS DUCTAL BREAST CANCER UP         | 200                 | 28 (14)               | 27 (13.5)            | 1 (0.5)                | <0.0001 | 0.0002 |
| BOQUEST STEM CELL CULTURED VS FRESH UP                | 409                 | 28 (6.8)              | 20 (4.9)             | 8 (2)                  | <0.0001 | 0.0002 |
| DEBIASI APOPTOSIS BY REOVIRUS INFECTION UP            | 317                 | 28 (8.8)              | 27 (8.5)             | 1 (0.3)                | <0.0001 | 0.0002 |
| JOHNSTONE PARVB TARGETS 3 UP                          | 425                 | 28 (6.6)              | 22 (5.2)             | 6 (1.4)                | <0.0001 | 0.0002 |
| RUTELLA RESPONSE TO HGF UP                            | 398                 | 28 (7)                | 22 (5.5)             | 6 (1.5)                | <0.0001 | 0.0002 |
| SMID BREAST CANCER BASAL UP                           | 607                 | 28 (4.6)              | 24 (4)               | 4 (0.7)                | <0.0001 | 0.0002 |
| WONG ADULT TISSUE STEM MODULE                         | 697                 | 28 (4)                | 16 (2.3)             | 12 (1.7)               | <0.0001 | 0.0002 |
| SPIELMAN LYMPHOBLAST EUROPEAN VS ASIAN DN             | 570                 | 26 (4.6)              | 23 (4)               | 3 (0.5)                | <0.0001 | 0.0002 |
| ALTEMEIER RESPONSE TO LPS WITH MECHANICAL VENTILATION | 126                 | 25 (19.8)             | 25 (19.8)            | 0 (0)                  | <0.0001 | 0.0002 |
| DELYS THYROID CANCER UP                               | 435                 | 25 (5.7)              | 16 (3.7)             | 9 (2.1)                | <0.0001 | 0.0002 |
| VERHAAK AML WITH NPM1 MUTATED UP                      | 190                 | 25 (13.2)             | 22 (11.6)            | 3 (1.6)                | <0.0001 | 0.0002 |
| HIRSCH CELLULAR TRANSFORMATION SIGNATURE UP           | 239                 | 23 (9.6)              | 20 (8.4)             | 3 (1.3)                | <0.0001 | 0.0002 |
| MOSERLE IFNA RESPONSE                                 | 31                  | 23 (74.2)             | 23 (74.2)            | 0 (0)                  | <0.0001 | 0.0002 |
| RUTELLA RESPONSE TO HGF VS CSF2RB AND IL4 UP          | 391                 | 23 (5.9)              | 22 (5.6)             | 1 (0.3)                | <0.0001 | 0.0002 |
| BAELDE DIABETIC NEPHROPATHY DN                        | 425                 | 22 (5.2)              | 19 (4.5)             | 3 (0.7)                | <0.0001 | 0.0002 |
| ENK UV RESPONSE EPIDERMIS DN                          | 496                 | 22 (4.4)              | 13 (2.6)             | 9 (1.8)                | <0.0001 | 0.0002 |



| Category Name                                       | Category<br>Genes # | Any-reg.<br>SDEG #(%) | Up-reg.<br>SDEG #(%) | Down-reg.<br>SDEG #(%) | P       | FDR    |
|-----------------------------------------------------|---------------------|-----------------------|----------------------|------------------------|---------|--------|
| HORIUCHI WTAP TARGETS UP                            | 295                 | 22 (7.5)              | 20 (6.8)             | 2 (0.7)                | <0.0001 | 0.0002 |
| MASSARWEH TAMOXIFEN RESISTANCE UP                   | 561                 | 22 (3.9)              | 14 (2.5)             | 8 (1.4)                | <0.0001 | 0.0002 |
| ZHANG RESPONSE TO IKK INHIBITOR AND TNF UP          | 221                 | 22 (10)               | 21 (9.5)             | 1 (0.5)                | <0.0001 | 0.0002 |
| DUTERTRE ESTRADIOL RESPONSE 24HR DN                 | 502                 | 21 (4.2)              | 15 (3)               | 6 (1.2)                | <0.0001 | 0.0002 |
| ICHIBA GRAFT VERSUS HOST DISEASE D7 UP              | 105                 | 21 (20)               | 20 (19)              | 1 (1)                  | <0.0001 | 0.0002 |
| RUTELLA RESPONSE TO CSF2RB AND IL4 UP               | 319                 | 21 (6.6)              | 13 (4.1)             | 8 (2.5)                | <0.0001 | 0.0002 |
| DAUER STAT3 TARGETS DN                              | 51                  | 20 (39.2)             | 20 (39.2)            | 0 (0)                  | <0.0001 | 0.0002 |
| KUMAR TARGETS OF MLL AF9 FUSION                     | 389                 | 20 (5.1)              | 15 (3.9)             | 5 (1.3)                | <0.0001 | 0.0002 |
| LI INDUCED T TO NATURAL KILLER UP                   | 302                 | 20 (6.6)              | 16 (5.3)             | 4 (1.3)                | <0.0001 | 0.0002 |
| LIU PROSTATE CANCER DN                              | 455                 | 20 (4.4)              | 10 (2.2)             | 10 (2.2)               | <0.0001 | 0.0002 |
| MITSIADES RESPONSE TO APLIDIN UP                    | 450                 | 20 (4.4)              | 15 (3.3)             | 5 (1.1)                | <0.0001 | 0.0002 |
| PHONG TNF RESPONSE NOT VIA P38                      | 333                 | 20 (6)                | 20 (6)               | 0 (0)                  | <0.0001 | 0.0002 |
| POOLA INVASIVE BREAST CANCER UP                     | 272                 | 20 (7.4)              | 17 (6.2)             | 3 (1.1)                | <0.0001 | 0.0002 |
| RICKMAN METASTASIS DN                               | 258                 | 20 (7.8)              | 17 (6.6)             | 3 (1.2)                | <0.0001 | 0.0002 |
| VERHAAK AML WITH NPM1 MUTATED DN                    | 238                 | 20 (8.4)              | 12 (5)               | 8 (3.4)                | <0.0001 | 0.0002 |
| BOSCO TH1 CYTOTOXIC MODULE                          | 114                 | 19 (16.7)             | 18 (15.8)            | 1 (0.9)                | <0.0001 | 0.0002 |
| LINDGREN BLADDER CANCER CLUSTER 2B                  | 376                 | 19 (5.1)              | 16 (4.3)             | 3 (0.8)                | <0.0001 | 0.0002 |
| RADAEVA RESPONSE TO IFNA1 UP                        | 52                  | 19 (36.5)             | 19 (36.5)            | 0 (0)                  | <0.0001 | 0.0002 |
| RUTELLA RESPONSE TO CSF2RB AND IL4 DN               | 303                 | 19 (6.3)              | 17 (5.6)             | 2 (0.7)                | <0.0001 | 0.0002 |
| SEITZ NEOPLASTIC TRANSFORMATION BY 8P DELETION UP   | 69                  | 19 (27.5)             | 18 (26.1)            | 1 (1.4)                | <0.0001 | 0.0002 |
| WIELAND UP BY HBV INFECTION                         | 100                 | 19 (19)               | 19 (19)              | 0 (0)                  | <0.0001 | 0.0002 |
| BENNETT SYSTEMIC LUPUS ERYTHEMATOSUS                | 32                  | 18 (56.2)             | 18 (56.2)            | 0 (0)                  | <0.0001 | 0.0002 |
| CHANG CORE SERUM RESPONSE DN                        | 205                 | 18 (8.8)              | 12 (5.9)             | 6 (2.9)                | <0.0001 | 0.0002 |
| COLINA TARGETS OF 4EBP1 AND 4EBP2                   | 339                 | 18 (5.3)              | 17 (5)               | 1 (0.3)                | <0.0001 | 0.0002 |
| DER IFN BETA RESPONSE UP                            | 101                 | 18 (17.8)             | 18 (17.8)            | 0 (0)                  | <0.0001 | 0.0002 |
| ODONNELL TFRC TARGETS UP                            | 409                 | 18 (4.4)              | 15 (3.7)             | 3 (0.7)                | <0.0001 | 0.0002 |
| RIGGINS TAMOXIFEN RESISTANCE DN                     | 215                 | 18 (8.4)              | 17 (7.9)             | 1 (0.5)                | <0.0001 | 0.0002 |
| SATO SILENCED BY METHYLATION IN PANCREATIC CANCER 1 | 412                 | 18 (4.4)              | 13 (3.2)             | 5 (1.2)                | <0.0001 | 0.0002 |
| VANTVEER BREAST CANCER ESR1 DN                      | 232                 | 18 (7.8)              | 18 (7.8)             | 0 (0)                  | <0.0001 | 0.0002 |
| DER IFN ALPHA RESPONSE UP                           | 74                  | 17 (23)               | 17 (23)              | 0 (0)                  | <0.0001 | 0.0002 |
| DURAND STROMA MAX UP                                | 270                 | 17 (6.3)              | 12 (4.4)             | 5 (1.9)                | <0.0001 | 0.0002 |
| LEI MYB TARGETS                                     | 307                 | 17 (5.5)              | 14 (4.6)             | 3 (1)                  | <0.0001 | 0.0002 |
| MCLACHLAN DENTAL CARIES UP                          | 227                 | 17 (7.5)              | 17 (7.5)             | 0 (0)                  | <0.0001 | 0.0002 |
| PICCALUGA ANGIOIMMUNOBLASTIC LYMPHOMA UP            | 205                 | 17 (8.3)              | 15 (7.3)             | 2 (1)                  | <0.0001 | 0.0002 |
| ROZANOV MMP14 TARGETS UP                            | 270                 | 17 (6.3)              | 12 (4.4)             | 5 (1.9)                | <0.0001 | 0.0002 |
| RUTELLA RESPONSE TO HGF VS CSF2RB AND IL4 DN        | 231                 | 17 (7.4)              | 8 (3.5)              | 9 (3.9)                | <0.0001 | 0.0002 |
| SCHUETZ BREAST CANCER DUCTAL INVASIVE UP            | 338                 | 17 (5)                | 11 (3.3)             | 6 (1.8)                | <0.0001 | 0.0002 |
| ZHU CMV ALL UP                                      | 121                 | 17 (14)               | 17 (14)              | 0 (0)                  | <0.0001 | 0.0002 |

| Category Name                                        | Category<br>Genes # | Any-reg.<br>SDEG #(%) | Up-reg.<br>SDEG #(%) | Down-reg.<br>SDEG #(%) | P       | FDR    |
|------------------------------------------------------|---------------------|-----------------------|----------------------|------------------------|---------|--------|
| BROCKE APOPTOSIS REVERSED BY IL6                     | 144                 | 16 (11.1)             | 15 (10.4)            | 1 (0.7)                | <0.0001 | 0.0002 |
| DANG REGULATED BY MYC DN                             | 247                 | 16 (6.5)              | 14 (5.7)             | 2 (0.8)                | <0.0001 | 0.0002 |
| LU EZH2 TARGETS UP                                   | 289                 | 16 (5.5)              | 12 (4.2)             | 4 (1.4)                | <0.0001 | 0.0002 |
| SANA TNF SIGNALING UP                                | 81                  | 16 (19.8)             | 16 (19.8)            | 0 (0)                  | <0.0001 | 0.0002 |
| TONKS TARGETS OF RUNX1 RUNX1T1 FUSION ERYTHROCYTE UP | 151                 | 16 (10.6)             | 14 (9.3)             | 2 (1.3)                | <0.0001 | 0.0002 |
| ACEVEDO FGFR1 TARGETS IN PROSTATE CANCER MODEL UP    | 278                 | 15 (5.4)              | 13 (4.7)             | 2 (0.7)                | <0.0001 | 0.0002 |
| HOLLMANN APOPTOSIS VIA CD40 DN                       | 259                 | 15 (5.8)              | 9 (3.5)              | 6 (2.3)                | <0.0001 | 0.0002 |
| ICHIBA GRAFT VERSUS HOST DISEASE 35D UP              | 126                 | 15 (11.9)             | 13 (10.3)            | 2 (1.6)                | <0.0001 | 0.0002 |
| MCLACHLAN DENTAL CARIES DN                           | 219                 | 15 (6.8)              | 15 (6.8)             | 0 (0)                  | <0.0001 | 0.0002 |
| PLASARI TGFB1 TARGETS 10HR DN                        | 233                 | 15 (6.4)              | 11 (4.7)             | 4 (1.7)                | <0.0001 | 0.0002 |
| SENGUPTA NASOPHARYNGEAL CARCINOMA UP                 | 287                 | 15 (5.2)              | 14 (4.9)             | 1 (0.3)                | <0.0001 | 0.0002 |
| VERHAAK GLIOBLASTOMA NEURAL                          | 205                 | 15 (7.3)              | 10 (4.9)             | 5 (2.4)                | <0.0001 | 0.0002 |
| WANG MLL TARGETS                                     | 280                 | 15 (5.4)              | 12 (4.3)             | 3 (1.1)                | <0.0001 | 0.0002 |
| DER IFN GAMMA RESPONSE UP                            | 72                  | 14 (19.4)             | 14 (19.4)            | 0 (0)                  | <0.0001 | 0.0002 |
| FARMER BREAST CANCER CLUSTER 1                       | 39                  | 14 (35.9)             | 13 (33.3)            | 1 (2.6)                | <0.0001 | 0.0002 |
| HUTTMANN B CLL POOR SURVIVAL UP                      | 258                 | 14 (5.4)              | 8 (3.1)              | 6 (2.3)                | <0.0001 | 0.0002 |
| MISSIAGLIA REGULATED BY METHYLATION UP               | 120                 | 14 (11.7)             | 11 (9.2)             | 3 (2.5)                | <0.0001 | 0.0002 |
| QI PLASMACYTOMA UP                                   | 251                 | 14 (5.6)              | 13 (5.2)             | 1 (0.4)                | <0.0001 | 0.0002 |
| TONKS TARGETS OF RUNX1 RUNX1T1 FUSION MONOCYTE UP    | 201                 | 14 (7)                | 11 (5.5)             | 3 (1.5)                | <0.0001 | 0.0002 |
| ZHU CMV 8 HR UP                                      | 48                  | 14 (29.2)             | 14 (29.2)            | 0 (0)                  | <0.0001 | 0.0002 |
| ALCALAY AML BY NPM1 LOCALIZATION DN                  | 178                 | 13 (7.3)              | 8 (4.5)              | 5 (2.8)                | <0.0001 | 0.0002 |
| LEE RECENT THYMIC EMIGRANT                           | 217                 | 13 (6)                | 11 (5.1)             | 2 (0.9)                | <0.0001 | 0.0002 |
| MIKKELSEN MCV6 LCP WITH H3K4ME3                      | 153                 | 13 (8.5)              | 12 (7.8)             | 1 (0.7)                | <0.0001 | 0.0002 |
| RIGGI EWING SARCOMA PROGENITOR DN                    | 185                 | 13 (7)                | 8 (4.3)              | 5 (2.7)                | <0.0001 | 0.0002 |
| STAMBOLSKY TARGETS OF MUTATED TP53 DN                | 51                  | 13 (25.5)             | 12 (23.5)            | 1 (2)                  | <0.0001 | 0.0002 |
| UROSEVIC RESPONSE TO IMIQUIMOD                       | 23                  | 13 (56.5)             | 13 (56.5)            | 0 (0)                  | <0.0001 | 0.0002 |
| WIERENGA STAT5A TARGETS UP                           | 210                 | 13 (6.2)              | 12 (5.7)             | 1 (0.5)                | <0.0001 | 0.0002 |
| ZHANG INTERFERON RESPONSE                            | 23                  | 13 (56.5)             | 13 (56.5)            | 0 (0)                  | <0.0001 | 0.0002 |
| KRASNOSELSKAYA ILF3 TARGETS UP                       | 37                  | 12 (32.4)             | 12 (32.4)            | 0 (0)                  | <0.0001 | 0.0002 |
| LIANG SILENCED BY METHYLATION 2                      | 55                  | 12 (21.8)             | 12 (21.8)            | 0 (0)                  | <0.0001 | 0.0002 |
| NAKAYAMA SOFT TISSUE TUMORS PCA1 UP                  | 69                  | 12 (17.4)             | 12 (17.4)            | 0 (0)                  | <0.0001 | 0.0002 |
| SEKI INFLAMMATORY RESPONSE LPS UP                    | 77                  | 12 (15.6)             | 12 (15.6)            | 0 (0)                  | <0.0001 | 0.0002 |
| TAKEDA TARGETS OF NUP98 HOXA9 FUSION 8D DN           | 193                 | 12 (6.2)              | 4 (2.1)              | 8 (4.1)                | <0.0001 | 0.0002 |
| BOWIE RESPONSE TO EXTRACELLULAR MATRIX               | 17                  | 11 (64.7)             | 11 (64.7)            | 0 (0)                  | <0.0001 | 0.0002 |
| BOWIE RESPONSE TO TAMOXIFEN                          | 18                  | 11 (61.1)             | 11 (61.1)            | 0 (0)                  | <0.0001 | 0.0002 |
| EINAV INTERFERON SIGNATURE IN CANCER                 | 27                  | 11 (40.7)             | 11 (40.7)            | 0 (0)                  | <0.0001 | 0.0002 |
| JECHLINGER EPITHELIAL TO MESENCHYMAL TRANSITION UP   | 71                  | 11 (15.5)             | 8 (11.3)             | 3 (4.2)                | <0.0001 | 0.0002 |
| KATSANOUE ELAVL1 TARGETS UP                          | 163                 | 11 (6.7)              | 8 (4.9)              | 3 (1.8)                | <0.0001 | 0.0002 |

| Category Name                                              | Category<br>Genes # | Any-reg.<br>SDEG #(%) | Up-reg.<br>SDEG #(%) | Down-reg.<br>SDEG #(%) | P       | FDR    |
|------------------------------------------------------------|---------------------|-----------------------|----------------------|------------------------|---------|--------|
| SARRIO EPITHELIAL MESENCHYMAL TRANSITION DN                | 149                 | 11 (7.4)              | 9 (6)                | 2 (1.3)                | <0.0001 | 0.0002 |
| SMIRNOV CIRCULATING ENDOTHELIOCYTES IN CANCER UP           | 152                 | 11 (7.2)              | 9 (5.9)              | 2 (1.3)                | <0.0001 | 0.0002 |
| CHANG IMMORTALIZED BY HPV31 DN                             | 63                  | 10 (15.9)             | 10 (15.9)            | 0 (0)                  | <0.0001 | 0.0002 |
| FLECHNER BIOPSY KIDNEY TRANSPLANT REJECTED VS OK UP        | 85                  | 10 (11.8)             | 9 (10.6)             | 1 (1.2)                | <0.0001 | 0.0002 |
| GERY CEBP TARGETS                                          | 137                 | 10 (7.3)              | 6 (4.4)              | 4 (2.9)                | <0.0001 | 0.0002 |
| HINATA NFKB TARGETS KERATINOCYTE UP                        | 91                  | 10 (11)               | 8 (8.8)              | 2 (2.2)                | <0.0001 | 0.0002 |
| ZHU CMV 24 HR UP                                           | 93                  | 10 (10.8)             | 10 (10.8)            | 0 (0)                  | <0.0001 | 0.0002 |
| BROWNE HCMV INFECTION 12HR UP                              | 105                 | 9 (8.6)               | 9 (8.6)              | 0 (0)                  | <0.0001 | 0.0002 |
| DAUER STAT3 TARGETS UP                                     | 50                  | 9 (18)                | 9 (18)               | 0 (0)                  | <0.0001 | 0.0002 |
| GHANDHI BYSTANDER IRRADIATION UP                           | 78                  | 9 (11.5)              | 9 (11.5)             | 0 (0)                  | <0.0001 | 0.0002 |
| JACKSON DNMT1 TARGETS UP                                   | 76                  | 9 (11.8)              | 8 (10.5)             | 1 (1.3)                | <0.0001 | 0.0002 |
| LENAOUR DENDRITIC CELL MATURATION UP                       | 112                 | 9 (8)                 | 7 (6.2)              | 2 (1.8)                | <0.0001 | 0.0002 |
| LINDSTEDT DENDRITIC CELL MATURATION A                      | 67                  | 9 (13.4)              | 9 (13.4)             | 0 (0)                  | <0.0001 | 0.0002 |
| LIU VAV3 PROSTATE CARCINOGENESIS UP                        | 85                  | 9 (10.6)              | 9 (10.6)             | 0 (0)                  | <0.0001 | 0.0002 |
| ROSS AML WITH MLL FUSIONS                                  | 76                  | 9 (11.8)              | 7 (9.2)              | 2 (2.6)                | <0.0001 | 0.0002 |
| SHAFFER IRF4 TARGETS IN ACTIVATED DENDRITIC CELL           | 61                  | 9 (14.8)              | 7 (11.5)             | 2 (3.3)                | <0.0001 | 0.0002 |
| TAVOR CEBPA TARGETS UP                                     | 47                  | 9 (19.1)              | 7 (14.9)             | 2 (4.3)                | <0.0001 | 0.0002 |
| WUNDER INFLAMMATORY RESPONSE AND CHOLESTEROL UP            | 61                  | 9 (14.8)              | 8 (13.1)             | 1 (1.6)                | <0.0001 | 0.0002 |
| ZHAN MULTIPLE MYELOMA LB DN                                | 39                  | 9 (23.1)              | 9 (23.1)             | 0 (0)                  | <0.0001 | 0.0002 |
| BRUECKNER TARGETS OF MIRLET7A3 DN                          | 74                  | 8 (10.8)              | 6 (8.1)              | 2 (2.7)                | <0.0001 | 0.0002 |
| GRANDVAUX IFN RESPONSE NOT VIA IRF3                        | 14                  | 8 (57.1)              | 8 (57.1)             | 0 (0)                  | <0.0001 | 0.0002 |
| GRANDVAUX IRF3 TARGETS UP                                  | 15                  | 8 (53.3)              | 8 (53.3)             | 0 (0)                  | <0.0001 | 0.0002 |
| ROETH TERT TARGETS UP                                      | 14                  | 8 (57.1)              | 8 (57.1)             | 0 (0)                  | <0.0001 | 0.0002 |
| SHAFFER IRF4 TARGETS IN PLASMA CELL VS MATURE B LYMPHOCYTE | 64                  | 8 (12.5)              | 6 (9.4)              | 2 (3.1)                | <0.0001 | 0.0002 |
| XU AKT1 TARGETS 6HR                                        | 27                  | 8 (29.6)              | 8 (29.6)             | 0 (0)                  | <0.0001 | 0.0002 |
| ZHENG IL22 SIGNALING UP                                    | 56                  | 8 (14.3)              | 6 (10.7)             | 2 (3.6)                | <0.0001 | 0.0002 |
| CASTELLANO NRAS TARGETS UP                                 | 68                  | 7 (10.3)              | 6 (8.8)              | 1 (1.5)                | <0.0001 | 0.0002 |
| FUJII YBX1 TARGETS UP                                      | 40                  | 7 (17.5)              | 7 (17.5)             | 0 (0)                  | <0.0001 | 0.0002 |
| GEISS RESPONSE TO DSRNA UP                                 | 35                  | 7 (20)                | 7 (20)               | 0 (0)                  | <0.0001 | 0.0002 |
| TSAI RESPONSE TO RADIATION THERAPY                         | 32                  | 7 (21.9)              | 7 (21.9)             | 0 (0)                  | <0.0001 | 0.0002 |
| YAN ESCAPE FROM ANOIKIS                                    | 24                  | 7 (29.2)              | 7 (29.2)             | 0 (0)                  | <0.0001 | 0.0002 |
| ZHANG ANTIVIRAL RESPONSE TO RIBAVIRIN UP                   | 29                  | 7 (24.1)              | 7 (24.1)             | 0 (0)                  | <0.0001 | 0.0002 |
| BURTON ADIPOGENESIS 7                                      | 45                  | 6 (13.3)              | 5 (11.1)             | 1 (2.2)                | <0.0001 | 0.0002 |
| CHIBA RESPONSE TO TSA                                      | 48                  | 6 (12.5)              | 5 (10.4)             | 1 (2.1)                | <0.0001 | 0.0002 |
| HAN JNK SINGALING UP                                       | 34                  | 6 (17.6)              | 6 (17.6)             | 0 (0)                  | <0.0001 | 0.0002 |
| KIM LRRC3B TARGETS                                         | 30                  | 6 (20)                | 6 (20)               | 0 (0)                  | <0.0001 | 0.0002 |
| MAHADEVAN RESPONSE TO MP470 UP                             | 19                  | 6 (31.6)              | 6 (31.6)             | 0 (0)                  | <0.0001 | 0.0002 |
| TSAI DNAJB4 TARGETS UP                                     | 13                  | 6 (46.2)              | 6 (46.2)             | 0 (0)                  | <0.0001 | 0.0002 |

| Category Name                                  | Category<br>Genes # | Any-reg.<br>SDEG #(%) | Up-reg.<br>SDEG #(%) | Down-reg.<br>SDEG #(%) | P       | FDR    |
|------------------------------------------------|---------------------|-----------------------|----------------------|------------------------|---------|--------|
| XU HGF TARGETS INDUCED BY AKT1 6HR             | 18                  | 6 (33.3)              | 6 (33.3)             | 0 (0)                  | <0.0001 | 0.0002 |
| RUAN RESPONSE TO TNF TROGLITAZONE UP           | 17                  | 5 (29.4)              | 5 (29.4)             | 0 (0)                  | <0.0001 | 0.0002 |
| RUAN RESPONSE TO TNF UP                        | 12                  | 5 (41.7)              | 5 (41.7)             | 0 (0)                  | <0.0001 | 0.0002 |
| STEGER ADIPOGENESIS UP                         | 21                  | 5 (23.8)              | 5 (23.8)             | 0 (0)                  | <0.0001 | 0.0002 |
| WATANABE ULCERATIVE COLITIS WITH CANCER DN     | 13                  | 5 (38.5)              | 5 (38.5)             | 0 (0)                  | <0.0001 | 0.0002 |
| FORTSCHEGGER PHF8 TARGETS DN                   | 749                 | 26 (3.5)              | 20 (2.7)             | 6 (0.8)                | <0.0001 | 0.0004 |
| KRIGE RESPONSE TO TOSEDOSTAT 24HR UP           | 740                 | 25 (3.4)              | 23 (3.1)             | 2 (0.3)                | <0.0001 | 0.0004 |
| KRIEG HYPOXIA NOT VIA KDM3A                    | 718                 | 24 (3.3)              | 18 (2.5)             | 6 (0.8)                | <0.0001 | 0.0004 |
| CHARAFE BREAST CANCER LUMINAL VS BASAL DN      | 440                 | 21 (4.8)              | 20 (4.5)             | 1 (0.2)                | <0.0001 | 0.0004 |
| ACEVEDO LIVER CANCER DN                        | 533                 | 20 (3.8)              | 12 (2.3)             | 8 (1.5)                | <0.0001 | 0.0004 |
| ZHOU INFLAMMATORY RESPONSE LIVE UP             | 448                 | 19 (4.2)              | 15 (3.3)             | 4 (0.9)                | <0.0001 | 0.0004 |
| SWEET LUNG CANCER KRAS DN                      | 425                 | 17 (4)                | 10 (2.4)             | 7 (1.6)                | <0.0001 | 0.0004 |
| WANG SMARCE1 TARGETS DN                        | 340                 | 17 (5)                | 14 (4.1)             | 3 (0.9)                | <0.0001 | 0.0004 |
| WANG SMARCE1 TARGETS UP                        | 265                 | 15 (5.7)              | 11 (4.2)             | 4 (1.5)                | <0.0001 | 0.0004 |
| GAUSSMANN MLL AF4 FUSION TARGETS F UP          | 182                 | 12 (6.6)              | 8 (4.4)              | 4 (2.2)                | <0.0001 | 0.0004 |
| FOSTER TOLERANT MACROPHAGE UP                  | 155                 | 11 (7.1)              | 11 (7.1)             | 0 (0)                  | <0.0001 | 0.0004 |
| KRIEG KDM3A TARGETS NOT HYPOXIA                | 189                 | 11 (5.8)              | 11 (5.8)             | 0 (0)                  | <0.0001 | 0.0004 |
| JOHNSTONE PARVB TARGETS 2 UP                   | 136                 | 9 (6.6)               | 9 (6.6)              | 0 (0)                  | <0.0001 | 0.0004 |
| MAHAJAN RESPONSE TO IL1A UP                    | 79                  | 9 (11.4)              | 7 (8.9)              | 2 (2.5)                | <0.0001 | 0.0004 |
| TAKEDA TARGETS OF NUP98 HOXA9 FUSION 10D DN    | 135                 | 9 (6.7)               | 3 (2.2)              | 6 (4.4)                | <0.0001 | 0.0004 |
| WANG ESOPHAGUS CANCER VS NORMAL UP             | 118                 | 9 (7.6)               | 7 (5.9)              | 2 (1.7)                | <0.0001 | 0.0004 |
| ZHONG SECRETOME OF LUNG CANCER AND FIBROBLAST  | 129                 | 9 (7)                 | 6 (4.7)              | 3 (2.3)                | <0.0001 | 0.0004 |
| BROWNE HCMV INFECTION 4HR UP                   | 53                  | 7 (13.2)              | 7 (13.2)             | 0 (0)                  | <0.0001 | 0.0004 |
| LEE LIVER CANCER E2F1 UP                       | 62                  | 7 (11.3)              | 5 (8.1)              | 2 (3.2)                | <0.0001 | 0.0004 |
| LIEN BREAST CARCINOMA METAPLASTIC VS DUCTAL UP | 78                  | 7 (9)                 | 6 (7.7)              | 1 (1.3)                | <0.0001 | 0.0004 |
| BECKER TAMOXIFEN RESISTANCE UP                 | 49                  | 6 (12.2)              | 6 (12.2)             | 0 (0)                  | <0.0001 | 0.0004 |
| MUELLER COMMON TARGETS OF AML FUSIONS DN       | 42                  | 6 (14.3)              | 5 (11.9)             | 1 (2.4)                | <0.0001 | 0.0004 |
| MURATA VIRULENCE OF H PILORI                   | 23                  | 5 (21.7)              | 5 (21.7)             | 0 (0)                  | <0.0001 | 0.0004 |
| SHARMA PILOCYTIC ASTROCYTOMA LOCATION UP       | 25                  | 5 (20)                | 3 (12)               | 2 (8)                  | <0.0001 | 0.0004 |
| ZWANG CLASS 1 TRANSIENTLY INDUCED BY EGF       | 505                 | 19 (3.8)              | 13 (2.6)             | 6 (1.2)                | <0.0001 | 0.0005 |
| BASAKI YBX1 TARGETS DN                         | 361                 | 16 (4.4)              | 14 (3.9)             | 2 (0.6)                | <0.0001 | 0.0005 |
| TARTE PLASMA CELL VS PLASMABLAST UP            | 388                 | 15 (3.9)              | 14 (3.6)             | 1 (0.3)                | <0.0001 | 0.0005 |
| ZWANG CLASS 3 TRANSIENTLY INDUCED BY EGF       | 220                 | 13 (5.9)              | 12 (5.5)             | 1 (0.5)                | <0.0001 | 0.0005 |
| GAL LEUKEMIC STEM CELL DN                      | 244                 | 12 (4.9)              | 10 (4.1)             | 2 (0.8)                | <0.0001 | 0.0005 |
| LEE LIVER CANCER SURVIVAL UP                   | 167                 | 11 (6.6)              | 7 (4.2)              | 4 (2.4)                | <0.0001 | 0.0005 |
| HESS TARGETS OF HOXA9 AND MEIS1 DN             | 76                  | 8 (10.5)              | 7 (9.2)              | 1 (1.3)                | <0.0001 | 0.0005 |
| GUTIERREZ CHRONIC LYMPHOCYTIC LEUKEMIA DN      | 56                  | 7 (12.5)              | 4 (7.1)              | 3 (5.4)                | <0.0001 | 0.0005 |
| DASU IL6 SIGNALING UP                          | 59                  | 6 (10.2)              | 5 (8.5)              | 1 (1.7)                | <0.0001 | 0.0005 |

| Category Name                                          | Category<br>Genes # | Any-reg.<br>SDEG #(%) | Up-reg.<br>SDEG #(%) | Down-reg.<br>SDEG #(%) | P       | FDR    |
|--------------------------------------------------------|---------------------|-----------------------|----------------------|------------------------|---------|--------|
| ONDER CDH1 TARGETS 2 UP                                | 235                 | 13 (5.5)              | 8 (3.4)              | 5 (2.1)                | <0.0001 | 0.0007 |
| MIKKELSEN MEF LCP WITH H3K4ME3                         | 121                 | 9 (7.4)               | 7 (5.8)              | 2 (1.7)                | <0.0001 | 0.0007 |
| NEMETH INFLAMMATORY RESPONSE LPS UP                    | 85                  | 8 (9.4)               | 8 (9.4)              | 0 (0)                  | <0.0001 | 0.0007 |
| GARGALOVIC RESPONSE TO OXIDIZED PHOSPHOLIPIDS GREY DN  | 73                  | 7 (9.6)               | 7 (9.6)              | 0 (0)                  | <0.0001 | 0.0007 |
| LINDSTEDT DENDRITIC CELL MATURATION B                  | 51                  | 6 (11.8)              | 6 (11.8)             | 0 (0)                  | <0.0001 | 0.0007 |
| XU RESPONSE TO TRETINOIN AND NSC682994 UP              | 16                  | 4 (25)                | 4 (25)               | 0 (0)                  | <0.0001 | 0.0007 |
| KOYAMA SEMA3B TARGETS DN                               | 394                 | 16 (4.1)              | 14 (3.6)             | 2 (0.5)                | <0.0001 | 0.0008 |
| THUM SYSTOLIC HEART FAILURE UP                         | 404                 | 16 (4)                | 15 (3.7)             | 1 (0.2)                | <0.0001 | 0.0008 |
| SANSOM APC TARGETS DN                                  | 359                 | 15 (4.2)              | 12 (3.3)             | 3 (0.8)                | <0.0001 | 0.0008 |
| RUTELLA RESPONSE TO HGF DN                             | 224                 | 12 (5.4)              | 8 (3.6)              | 4 (1.8)                | <0.0001 | 0.0008 |
| CAIRO HEPATOBLASTOMA CLASSES DN                        | 204                 | 11 (5.4)              | 6 (2.9)              | 5 (2.5)                | <0.0001 | 0.0008 |
| BROWNE HCMV INFECTION 8HR UP                           | 102                 | 8 (7.8)               | 7 (6.9)              | 1 (1)                  | <0.0001 | 0.0008 |
| SHAFFER IRF4 TARGETS IN MYELOMA VS MATURE B LYMPHOCYTE | 97                  | 8 (8.2)               | 7 (7.2)              | 1 (1)                  | <0.0001 | 0.0008 |
| FURUKAWA DUSP6 TARGETS PCI35 UP                        | 73                  | 7 (9.6)               | 7 (9.6)              | 0 (0)                  | <0.0001 | 0.0008 |
| YAO HOXA10 TARGETS VIA PROGESTERONE UP                 | 79                  | 7 (8.9)               | 4 (5.1)              | 3 (3.8)                | <0.0001 | 0.0008 |
| ZWANG TRANSIENTLY UP BY 2ND EGF PULSE ONLY             | 1568                | 37 (2.4)              | 20 (1.3)             | 17 (1.1)               | <0.0001 | 0.0009 |
| SENGUPTA NASOPHARYNGEAL CARCINOMA WITH LMP1 UP         | 387                 | 17 (4.4)              | 14 (3.6)             | 3 (0.8)                | <0.0001 | 0.0009 |
| SERVITJA ISLET HNF1A TARGETS UP                        | 160                 | 10 (6.2)              | 8 (5)                | 2 (1.2)                | <0.0001 | 0.0009 |
| DIAZ CHRONIC MEYLOGENOUS LEUKEMIA DN                   | 112                 | 8 (7.1)               | 7 (6.2)              | 1 (0.9)                | <0.0001 | 0.0009 |
| KIM GLIS2 TARGETS UP                                   | 84                  | 7 (8.3)               | 7 (8.3)              | 0 (0)                  | <0.0001 | 0.0009 |
| DIRMEIER LMP1 RESPONSE EARLY                           | 67                  | 6 (9)                 | 5 (7.5)              | 1 (1.5)                | <0.0001 | 0.0009 |
| KRIGE RESPONSE TO TOSEDOSTAT 6HR UP                    | 915                 | 27 (3)                | 24 (2.6)             | 3 (0.3)                | <0.0001 | 0.0011 |
| WIERENGA STAT5A TARGETS GROUP1                         | 130                 | 9 (6.9)               | 8 (6.2)              | 1 (0.8)                | <0.0001 | 0.0011 |
| YIH RESPONSE TO ARSENITE C5                            | 9                   | 3 (33.3)              | 3 (33.3)             | 0 (0)                  | <0.0001 | 0.0011 |
| DODD NASOPHARYNGEAL CARCINOMA DN                       | 1330                | 35 (2.6)              | 30 (2.3)             | 5 (0.4)                | <0.0001 | 0.0012 |
| ALFANO MYC TARGETS                                     | 234                 | 12 (5.1)              | 9 (3.8)              | 3 (1.3)                | <0.0001 | 0.0012 |
| KIM WT1 TARGETS 12HR DN                                | 206                 | 11 (5.3)              | 9 (4.4)              | 2 (1)                  | <0.0001 | 0.0012 |
| CHIARADONNA NEOPLASTIC TRANSFORMATION KRAS DN          | 143                 | 9 (6.3)               | 6 (4.2)              | 3 (2.1)                | <0.0001 | 0.0012 |
| CREIGHTON ENDOCRINE THERAPY RESISTANCE 3               | 696                 | 22 (3.2)              | 16 (2.3)             | 6 (0.9)                | <0.0001 | 0.0013 |
| FLECHNER BIOPSY KIDNEY TRANSPLANT OK VS DONOR UP       | 529                 | 19 (3.6)              | 18 (3.4)             | 1 (0.2)                | <0.0001 | 0.0013 |
| CHICAS RB1 TARGETS GROWING                             | 233                 | 12 (5.2)              | 8 (3.4)              | 4 (1.7)                | <0.0001 | 0.0013 |
| GAVIN FOXP3 TARGETS CLUSTER P2                         | 77                  | 7 (9.1)               | 6 (7.8)              | 1 (1.3)                | <0.0001 | 0.0013 |
| KANG GIST WITH PDGFRA UP                               | 50                  | 6 (12)                | 5 (10)               | 1 (2)                  | <0.0001 | 0.0013 |
| NIELSEN SYNOVIAL SARCOMA DN                            | 19                  | 4 (21.1)              | 4 (21.1)             | 0 (0)                  | <0.0001 | 0.0013 |
| SARTIPY BLUNTED BY INSULIN RESISTANCE UP               | 19                  | 4 (21.1)              | 4 (21.1)             | 0 (0)                  | <0.0001 | 0.0014 |
| ONDER CDH1 TARGETS 2 DN                                | 454                 | 17 (3.7)              | 13 (2.9)             | 4 (0.9)                | 0.0001  | 0.0016 |
| RODRIGUES THYROID CARCINOMA DN                         | 75                  | 7 (9.3)               | 6 (8)                | 1 (1.3)                | 0.0001  | 0.0016 |
| GUO HEX TARGETS DN                                     | 67                  | 6 (9)                 | 4 (6)                | 2 (3)                  | 0.0001  | 0.0016 |

| Category Name                                     | Category<br>Genes # | Any-reg.<br>SDEG #(%) | Up-reg.<br>SDEG #(%) | Down-reg.<br>SDEG #(%) | P      | FDR    |
|---------------------------------------------------|---------------------|-----------------------|----------------------|------------------------|--------|--------|
| MCBRYAN PUBERTAL TGFB1 TARGETS DN                 | 65                  | 6 (9.2)               | 4 (6.2)              | 2 (3.1)                | 0.0001 | 0.0016 |
| MONNIER POSTRADIATION TUMOR ESCAPE DN             | 357                 | 14 (3.9)              | 12 (3.4)             | 2 (0.6)                | 0.0001 | 0.0018 |
| OSWALD HEMATOPOIETIC STEM CELL IN COLLAGEN GEL UP | 227                 | 11 (4.8)              | 9 (4)                | 2 (0.9)                | 0.0001 | 0.0018 |
| BROWN MYELOID CELL DEVELOPMENT UP                 | 159                 | 9 (5.7)               | 9 (5.7)              | 0 (0)                  | 0.0001 | 0.0018 |
| VALK AML WITH FLT3 ITD                            | 38                  | 5 (13.2)              | 3 (7.9)              | 2 (5.3)                | 0.0001 | 0.0018 |
| ZWANG TRANSIENTLY UP BY 1ST EGF PULSE ONLY        | 1723                | 39 (2.3)              | 32 (1.9)             | 7 (0.4)                | 0.0001 | 0.0019 |
| BRUINS UVC RESPONSE LATE                          | 1111                | 29 (2.6)              | 22 (2)               | 7 (0.6)                | 0.0001 | 0.0019 |
| IVANOVA HEMATOPOIESIS STEM CELL AND PROGENITOR    | 654                 | 21 (3.2)              | 11 (1.7)             | 10 (1.5)               | 0.0001 | 0.0019 |
| MEISSNER BRAIN HCP WITH H3K4ME3 AND H3K27ME3      | 1060                | 29 (2.7)              | 17 (1.6)             | 12 (1.1)               | 0.0001 | 0.002  |
| RODRIGUES THYROID CARCINOMA ANAPLASTIC UP         | 707                 | 22 (3.1)              | 19 (2.7)             | 3 (0.4)                | 0.0001 | 0.002  |
| MEISSNER NPC HCP WITH H3K4ME2                     | 477                 | 17 (3.6)              | 10 (2.1)             | 7 (1.5)                | 0.0001 | 0.002  |
| YAMAZAKI TCEB3 TARGETS UP                         | 172                 | 10 (5.8)              | 7 (4.1)              | 3 (1.7)                | 0.0001 | 0.002  |
| SCHAEFFER PROSTATE DEVELOPMENT 48HR DN            | 411                 | 16 (3.9)              | 6 (1.5)              | 10 (2.4)               | 0.0002 | 0.0021 |
| VECCHI GASTRIC CANCER EARLY UP                    | 413                 | 15 (3.6)              | 7 (1.7)              | 8 (1.9)                | 0.0002 | 0.0021 |
| DIRMEIER LMP1 RESPONSE LATE DN                    | 30                  | 4 (13.3)              | 3 (10)               | 1 (3.3)                | 0.0002 | 0.0021 |
| HAN SATB1 TARGETS DN                              | 421                 | 16 (3.8)              | 15 (3.6)             | 1 (0.2)                | 0.0002 | 0.0025 |
| PURBEY TARGETS OF CTBP1 NOT SATB1 DN              | 412                 | 15 (3.6)              | 9 (2.2)              | 6 (1.5)                | 0.0002 | 0.0025 |
| ZHONG SECRETOME OF LUNG CANCER AND MACROPHAGE     | 75                  | 6 (8)                 | 6 (8)                | 0 (0)                  | 0.0002 | 0.0025 |
| HWANG PROSTATE CANCER MARKERS                     | 26                  | 4 (15.4)              | 4 (15.4)             | 0 (0)                  | 0.0002 | 0.0026 |
| SHETH LIVER CANCER VS TXNIP LOSS PAM1             | 217                 | 10 (4.6)              | 6 (2.8)              | 4 (1.8)                | 0.0002 | 0.0028 |
| PEDRIOLI MIR31 TARGETS DN                         | 398                 | 15 (3.8)              | 13 (3.3)             | 2 (0.5)                | 0.0002 | 0.0029 |
| PEREZ TP63 TARGETS                                | 343                 | 14 (4.1)              | 10 (2.9)             | 4 (1.2)                | 0.0002 | 0.003  |
| FOSTER KDM1A TARGETS UP                           | 250                 | 11 (4.4)              | 10 (4)               | 1 (0.4)                | 0.0002 | 0.003  |
| MULLIGHAN NPM1 SIGNATURE 3 DN                     | 155                 | 9 (5.8)               | 6 (3.9)              | 3 (1.9)                | 0.0002 | 0.003  |
| SASAKI ADULT T CELL LEUKEMIA                      | 186                 | 9 (4.8)               | 8 (4.3)              | 1 (0.5)                | 0.0002 | 0.003  |
| HAN SATB1 TARGETS UP                              | 380                 | 14 (3.7)              | 9 (2.4)              | 5 (1.3)                | 0.0002 | 0.0031 |
| BAUS TFF2 TARGETS UP                              | 32                  | 4 (12.5)              | 4 (12.5)             | 0 (0)                  | 0.0002 | 0.0031 |
| HELLER HDAC TARGETS SILENCED BY METHYLATION UP    | 439                 | 15 (3.4)              | 11 (2.5)             | 4 (0.9)                | 0.0002 | 0.0031 |
| DOANE RESPONSE TO ANDROGEN DN                     | 232                 | 11 (4.7)              | 9 (3.9)              | 2 (0.9)                | 0.0002 | 0.0031 |
| ELVIDGE HYPOXIA UP                                | 166                 | 9 (5.4)               | 7 (4.2)              | 2 (1.2)                | 0.0002 | 0.0031 |
| VANHARANTA UTERINE FIBROID DN                     | 66                  | 6 (9.1)               | 4 (6.1)              | 2 (3)                  | 0.0002 | 0.0031 |
| ELVIDGE HYPOXIA BY DMOG UP                        | 126                 | 8 (6.3)               | 6 (4.8)              | 2 (1.6)                | 0.0003 | 0.0032 |
| GHANDHI DIRECT IRRADIATION UP                     | 106                 | 7 (6.6)               | 7 (6.6)              | 0 (0)                  | 0.0003 | 0.0032 |
| PELLICCIOTTA HDAC IN ANTIGEN PRESENTATION DN      | 51                  | 5 (9.8)               | 5 (9.8)              | 0 (0)                  | 0.0003 | 0.0032 |
| NOJIMA SFRP2 TARGETS DN                           | 25                  | 4 (16)                | 4 (16)               | 0 (0)                  | 0.0003 | 0.0032 |
| HOSHIDA LIVER CANCER SUBCLASS S3                  | 259                 | 11 (4.2)              | 10 (3.9)             | 1 (0.4)                | 0.0003 | 0.0033 |
| ZHONG SECRETOME OF LUNG CANCER AND ENDOTHELIUM    | 66                  | 6 (9.1)               | 5 (7.6)              | 1 (1.5)                | 0.0003 | 0.0034 |
| ZHONG RESPONSE TO AZACITIDINE AND TSA UP          | 180                 | 9 (5)                 | 5 (2.8)              | 4 (2.2)                | 0.0003 | 0.0035 |

| Category Name                              | Category<br>Genes # | Any-reg.<br>SDEG #(%) | Up-reg.<br>SDEG #(%) | Down-reg.<br>SDEG #(%) | P      | FDR    |
|--------------------------------------------|---------------------|-----------------------|----------------------|------------------------|--------|--------|
| JI RESPONSE TO FSH UP                      | 85                  | 6 (7.1)               | 6 (7.1)              | 0 (0)                  | 0.0003 | 0.0035 |
| LABBE TARGETS OF TGFB1 AND WNT3A DN        | 106                 | 7 (6.6)               | 7 (6.6)              | 0 (0)                  | 0.0003 | 0.0036 |
| NATSUME RESPONSE TO INTERFERON BETA UP     | 71                  | 6 (8.5)               | 5 (7)                | 1 (1.4)                | 0.0003 | 0.0036 |
| SERVITJA LIVER HNF1A TARGETS UP            | 135                 | 8 (5.9)               | 3 (2.2)              | 5 (3.7)                | 0.0003 | 0.0037 |
| KIM RESPONSE TO TSA AND DECITABINE UP      | 120                 | 7 (5.8)               | 6 (5)                | 1 (0.8)                | 0.0003 | 0.0038 |
| GILDEA METASTASIS                          | 30                  | 4 (13.3)              | 2 (6.7)              | 2 (6.7)                | 0.0003 | 0.0038 |
| LU TUMOR VASCULATURE UP                    | 27                  | 4 (14.8)              | 4 (14.8)             | 0 (0)                  | 0.0003 | 0.0038 |
| YAGI AML WITH 11Q23 REARRANGED             | 332                 | 13 (3.9)              | 11 (3.3)             | 2 (0.6)                | 0.0003 | 0.0039 |
| ZHAN MULTIPLE MYELOMA HP UP                | 50                  | 5 (10)                | 4 (8)                | 1 (2)                  | 0.0003 | 0.0039 |
| LEE AGING CEREBELLUM UP                    | 81                  | 6 (7.4)               | 6 (7.4)              | 0 (0)                  | 0.0003 | 0.004  |
| BOYLAN MULTIPLE MYELOMA PCA3 UP            | 76                  | 6 (7.9)               | 4 (5.3)              | 2 (2.6)                | 0.0003 | 0.0041 |
| WHITESIDE CISPLATIN RESISTANCE UP          | 11                  | 3 (27.3)              | 3 (27.3)             | 0 (0)                  | 0.0003 | 0.0041 |
| HILLION HMGA1B TARGETS                     | 90                  | 6 (6.7)               | 4 (4.4)              | 2 (2.2)                | 0.0004 | 0.0042 |
| MARTORIATI MDM4 TARGETS FETAL LIVER UP     | 224                 | 10 (4.5)              | 6 (2.7)              | 4 (1.8)                | 0.0004 | 0.0043 |
| VILIMAS NOTCH1 TARGETS UP                  | 51                  | 5 (9.8)               | 4 (7.8)              | 1 (2)                  | 0.0004 | 0.0043 |
| CROONQUIST STROMAL STIMULATION DN          | 12                  | 3 (25)                | 2 (16.7)             | 1 (8.3)                | 0.0004 | 0.0043 |
| CAIRO HEPATOBLASTOMA DN                    | 259                 | 11 (4.2)              | 8 (3.1)              | 3 (1.2)                | 0.0004 | 0.0044 |
| GRUETZMANN PANCREATIC CANCER UP            | 351                 | 13 (3.7)              | 11 (3.1)             | 2 (0.6)                | 0.0004 | 0.0045 |
| IIZUKA LIVER CANCER PROGRESSION G1 G2 UP   | 12                  | 3 (25)                | 3 (25)               | 0 (0)                  | 0.0004 | 0.0045 |
| CASORELLI ACUTE PROMYELOCYTIC LEUKEMIA DN  | 624                 | 19 (3)                | 14 (2.2)             | 5 (0.8)                | 0.0004 | 0.0045 |
| TORCHIA TARGETS OF EWSR1 FLI1 FUSION DN    | 306                 | 12 (3.9)              | 11 (3.6)             | 1 (0.3)                | 0.0004 | 0.0045 |
| DEMAGALHAES AGING UP                       | 56                  | 5 (8.9)               | 5 (8.9)              | 0 (0)                  | 0.0004 | 0.0045 |
| GRAHAM CML QUIESCENT VS NORMAL DIVIDING UP | 55                  | 5 (9.1)               | 3 (5.5)              | 2 (3.6)                | 0.0004 | 0.0046 |
| HINATA NFKB TARGETS FIBROBLAST UP          | 83                  | 6 (7.2)               | 4 (4.8)              | 2 (2.4)                | 0.0004 | 0.0049 |
| KAN RESPONSE TO ARSENIC TRIOXIDE           | 114                 | 7 (6.1)               | 6 (5.3)              | 1 (0.9)                | 0.0005 | 0.0054 |
| PEDERSEN METASTASIS BY ERBB2 ISOFORM 7     | 401                 | 14 (3.5)              | 11 (2.7)             | 3 (0.7)                | 0.0005 | 0.0055 |
| LEE LIVER CANCER MYC E2F1 UP               | 56                  | 5 (8.9)               | 4 (7.1)              | 1 (1.8)                | 0.0005 | 0.0055 |
| PATTERSON DOCETAXEL RESISTANCE             | 28                  | 4 (14.3)              | 4 (14.3)             | 0 (0)                  | 0.0005 | 0.0056 |
| BRUINS UVC RESPONSE VIA TP53 GROUP A       | 872                 | 23 (2.6)              | 14 (1.6)             | 9 (1)                  | 0.0005 | 0.0059 |
| NOJIMA SFRP2 TARGETS UP                    | 31                  | 4 (12.9)              | 4 (12.9)             | 0 (0)                  | 0.0005 | 0.0059 |
| HSIAO LIVER SPECIFIC GENES                 | 234                 | 10 (4.3)              | 8 (3.4)              | 2 (0.9)                | 0.0005 | 0.006  |
| LI WILMS TUMOR VS FETAL KIDNEY 1 UP        | 176                 | 9 (5.1)               | 7 (4)                | 2 (1.1)                | 0.0005 | 0.006  |
| LEE LIVER CANCER ACOX1 UP                  | 63                  | 5 (7.9)               | 4 (6.3)              | 1 (1.6)                | 0.0006 | 0.0061 |
| LEE EARLY T LYMPHOCYTE DN                  | 55                  | 5 (9.1)               | 4 (7.3)              | 1 (1.8)                | 0.0006 | 0.0066 |
| PETROVA ENDOTHELIUM LYMPHATIC VS BLOOD DN  | 157                 | 8 (5.1)               | 8 (5.1)              | 0 (0)                  | 0.0006 | 0.0067 |
| GROSS ELK3 TARGETS DN                      | 32                  | 4 (12.5)              | 4 (12.5)             | 0 (0)                  | 0.0006 | 0.0067 |
| XU RESPONSE TO TRETINOIN UP                | 16                  | 3 (18.8)              | 2 (12.5)             | 1 (6.2)                | 0.0006 | 0.007  |
| MARKEY RB1 CHRONIC LOF UP                  | 112                 | 7 (6.2)               | 3 (2.7)              | 4 (3.6)                | 0.0007 | 0.0071 |

| Category Name                                   | Category<br>Genes # | Any-reg.<br>SDEG #(%) | Up-reg.<br>SDEG #(%) | Down-reg.<br>SDEG #(%) | P      | FDR    |
|-------------------------------------------------|---------------------|-----------------------|----------------------|------------------------|--------|--------|
| VECCHI GASTRIC CANCER ADVANCED VS EARLY UP      | 168                 | 9 (5.4)               | 7 (4.2)              | 2 (1.2)                | 0.0007 | 0.0074 |
| DUTTA APOPTOSIS VIA NFKB                        | 32                  | 4 (12.5)              | 4 (12.5)             | 0 (0)                  | 0.0007 | 0.0075 |
| MARTENS BOUND BY PML RARA FUSION                | 446                 | 15 (3.4)              | 9 (2)                | 6 (1.3)                | 0.0007 | 0.0077 |
| MULLIGHAN MLL SIGNATURE 1 DN                    | 231                 | 10 (4.3)              | 5 (2.2)              | 5 (2.2)                | 0.0007 | 0.0077 |
| CADWELL ATG16L1 TARGETS UP                      | 94                  | 6 (6.4)               | 5 (5.3)              | 1 (1.1)                | 0.0007 | 0.0079 |
| CONCANNON APOPTOSIS BY EPOXOMICIN DN            | 172                 | 8 (4.7)               | 4 (2.3)              | 4 (2.3)                | 0.0007 | 0.0079 |
| YOSHIMURA MAPK8 TARGETS UP                      | 1281                | 29 (2.3)              | 21 (1.6)             | 8 (0.6)                | 0.0008 | 0.008  |
| SHEDDEN LUNG CANCER GOOD SURVIVAL A12           | 280                 | 11 (3.9)              | 10 (3.6)             | 1 (0.4)                | 0.0008 | 0.008  |
| LEE SP4 THYMOCYTE                               | 14                  | 3 (21.4)              | 3 (21.4)             | 0 (0)                  | 0.0008 | 0.008  |
| NAKAJIMA MAST CELL                              | 43                  | 4 (9.3)               | 3 (7)                | 1 (2.3)                | 0.0008 | 0.0086 |
| GOBERT OLIGODENDROCYTE DIFFERENTIATION DN       | 1051                | 27 (2.6)              | 16 (1.5)             | 11 (1)                 | 0.0008 | 0.0087 |
| VALK AML CLUSTER 9                              | 34                  | 4 (11.8)              | 1 (2.9)              | 3 (8.8)                | 0.0008 | 0.0087 |
| IZADPANAH STEM CELL ADIPOSE VS BONE UP          | 125                 | 7 (5.6)               | 6 (4.8)              | 1 (0.8)                | 0.0008 | 0.0088 |
| BOYLAN MULTIPLE MYELOMA PCA1 UP                 | 96                  | 6 (6.2)               | 5 (5.2)              | 1 (1)                  | 0.0008 | 0.0088 |
| DOUGLAS BMI1 TARGETS DN                         | 308                 | 12 (3.9)              | 12 (3.9)             | 0 (0)                  | 0.0009 | 0.0089 |
| BOYLAN MULTIPLE MYELOMA C D DN                  | 244                 | 10 (4.1)              | 8 (3.3)              | 2 (0.8)                | 0.0009 | 0.0089 |
| PLASARI TGFB1 SIGNALING VIA NFIC 10HR UP        | 54                  | 5 (9.3)               | 5 (9.3)              | 0 (0)                  | 0.0009 | 0.0089 |
| KOINUMA COLON CANCER MSI DN                     | 16                  | 3 (18.8)              | 2 (12.5)             | 1 (6.2)                | 0.0009 | 0.0089 |
| CHARAFE BREAST CANCER LUMINAL VS MESENCHYMAL DN | 447                 | 15 (3.4)              | 10 (2.2)             | 5 (1.1)                | 0.0009 | 0.009  |
| RUIZ TNC TARGETS UP                             | 149                 | 8 (5.4)               | 7 (4.7)              | 1 (0.7)                | 0.0009 | 0.009  |
| ZHOU INFLAMMATORY RESPONSE FIMA UP              | 504                 | 16 (3.2)              | 11 (2.2)             | 5 (1)                  | 0.0009 | 0.0092 |
| SENESE HDAC3 TARGETS UP                         | 477                 | 16 (3.4)              | 14 (2.9)             | 2 (0.4)                | 0.0009 | 0.0093 |
| MARTINEZ RB1 AND TP53 TARGETS UP                | 582                 | 17 (2.9)              | 12 (2.1)             | 5 (0.9)                | 0.0009 | 0.0094 |
| BROWNE HCMV INFECTION 48HR DN                   | 477                 | 15 (3.1)              | 9 (1.9)              | 6 (1.3)                | 0.001  | 0.0097 |
| MIKKELSEN IPS LCP WITH H3K4ME3                  | 170                 | 8 (4.7)               | 7 (4.1)              | 1 (0.6)                | 0.001  | 0.0098 |
| PROVENZANI METASTASIS DN                        | 133                 | 7 (5.3)               | 6 (4.5)              | 1 (0.8)                | 0.001  | 0.0098 |
| GAJATE RESPONSE TO TRABECTEDIN UP               | 68                  | 5 (7.4)               | 5 (7.4)              | 0 (0)                  | 0.001  | 0.0098 |
| KAAB FAILED HEART VENTRICLE DN                  | 41                  | 4 (9.8)               | 4 (9.8)              | 0 (0)                  | 0.001  | 0.0098 |

**Table A87:** Significantly enriched MSigDB Chemical/Genetic Perturbation Sets (RNA-Seq, Monocytes, Day 1). Results sorted by FDR and #SDEG genes.

| Category Name                       | Category<br>Genes # | Any-reg.<br>SDEG #(%) | Up-reg.<br>SDEG #(%) | Down-reg.<br>SDEG #(%) | P       | FDR    |
|-------------------------------------|---------------------|-----------------------|----------------------|------------------------|---------|--------|
| Influenza A                         | 149                 | 23 (15.4)             | 22 (14.8)            | 1 (0.7)                | <0.0001 | 0.0001 |
| Herpes simplex infection            | 154                 | 23 (14.9)             | 22 (14.3)            | 1 (0.6)                | <0.0001 | 0.0001 |
| Tuberculosis                        | 159                 | 16 (10.1)             | 16 (10.1)            | 0 (0)                  | <0.0001 | 0.0001 |
| Antigen processing and presentation | 64                  | 15 (23.4)             | 15 (23.4)            | 0 (0)                  | <0.0001 | 0.0001 |
| Systemic lupus erythematosus        | 106                 | 13 (12.3)             | 12 (11.3)            | 1 (0.9)                | <0.0001 | 0.0001 |



| Category Name                                | Category<br>Genes # | Any-reg.<br>SDEG #(%) | Up-reg.<br>SDEG #(%) | Down-reg.<br>SDEG #(%) | P       | FDR    |
|----------------------------------------------|---------------------|-----------------------|----------------------|------------------------|---------|--------|
| Rheumatoid arthritis                         | 77                  | 13 (16.9)             | 9 (11.7)             | 4 (5.2)                | <0.0001 | 0.0001 |
| Measles                                      | 115                 | 12 (10.4)             | 11 (9.6)             | 1 (0.9)                | <0.0001 | 0.0001 |
| Inflammatory bowel disease (IBD)             | 53                  | 12 (22.6)             | 12 (22.6)            | 0 (0)                  | <0.0001 | 0.0001 |
| Toxoplasmosis                                | 101                 | 11 (10.9)             | 10 (9.9)             | 1 (1)                  | <0.0001 | 0.0001 |
| Staphylococcus aureus infection              | 47                  | 11 (23.4)             | 11 (23.4)            | 0 (0)                  | <0.0001 | 0.0001 |
| Hepatitis C                                  | 117                 | 11 (9.4)              | 10 (8.5)             | 1 (0.9)                | <0.0001 | 0.0001 |
| Hematopoietic cell lineage                   | 74                  | 10 (13.5)             | 8 (10.8)             | 2 (2.7)                | <0.0001 | 0.0001 |
| Leishmaniasis                                | 60                  | 10 (16.7)             | 9 (15)               | 1 (1.7)                | <0.0001 | 0.0001 |
| Intestinal immune network for IgA production | 37                  | 9 (24.3)              | 9 (24.3)             | 0 (0)                  | <0.0001 | 0.0001 |
| Viral myocarditis                            | 51                  | 9 (17.6)              | 9 (17.6)             | 0 (0)                  | <0.0001 | 0.0001 |
| Type I diabetes mellitus                     | 37                  | 7 (18.9)              | 7 (18.9)             | 0 (0)                  | <0.0001 | 0.0001 |
| Asthma                                       | 23                  | 7 (30.4)              | 7 (30.4)             | 0 (0)                  | <0.0001 | 0.0001 |
| Autoimmune thyroid disease                   | 45                  | 7 (15.6)              | 7 (15.6)             | 0 (0)                  | <0.0001 | 0.0001 |
| Allograft rejection                          | 31                  | 7 (22.6)              | 7 (22.6)             | 0 (0)                  | <0.0001 | 0.0001 |
| Graft-versus-host disease                    | 33                  | 7 (21.2)              | 7 (21.2)             | 0 (0)                  | <0.0001 | 0.0001 |
| HTLV-I infection                             | 229                 | 15 (6.6)              | 13 (5.7)             | 2 (0.9)                | <0.0001 | 0.0004 |
| Phagosome                                    | 131                 | 11 (8.4)              | 11 (8.4)             | 0 (0)                  | <0.0001 | 0.0004 |
| RIG-I-like receptor signaling pathway        | 62                  | 7 (11.3)              | 5 (8.1)              | 2 (3.2)                | <0.0001 | 0.0005 |
| Cell adhesion molecules (CAMs)               | 123                 | 11 (8.9)              | 11 (8.9)             | 0 (0)                  | <0.0001 | 0.0006 |
| Pertussis                                    | 70                  | 8 (11.4)              | 6 (8.6)              | 2 (2.9)                | <0.0001 | 0.0006 |
| NOD-like receptor signaling pathway          | 52                  | 6 (11.5)              | 4 (7.7)              | 2 (3.8)                | 0.0003  | 0.0032 |
| Proteasome                                   | 41                  | 5 (12.2)              | 5 (12.2)             | 0 (0)                  | 0.0003  | 0.0037 |

**Table A88:** Significantly enriched KEGG Pathways (RNA-Seq, Neutrophils, Day 1). Results sorted by FDR and #SDEG genes.

| Category Name    | Category<br>Genes # | Any-reg.<br>SDEG #(%) | Up-reg.<br>SDEG #(%) | Down-reg.<br>SDEG #(%) | P       | FDR    |
|------------------|---------------------|-----------------------|----------------------|------------------------|---------|--------|
| Immunoproteasome | 16                  | 5 (31.2)              | 5 (31.2)             | 0 (0)                  | <0.0001 | 0.0016 |

**Table A89:** Significantly enriched KEGG Modules (RNA-Seq, Neutrophils, Day 1). Results sorted by FDR and #SDEG genes.

| Category Name                   | Category<br>Genes # | Any-reg.<br>SDEG #(%) | Up-reg.<br>SDEG #(%) | Down-reg.<br>SDEG #(%) | P       | FDR    |
|---------------------------------|---------------------|-----------------------|----------------------|------------------------|---------|--------|
| SIGNAL TRANSDUCTION             | 1580                | 62 (3.9)              | 50 (3.2)             | 12 (0.8)               | <0.0001 | 0.0009 |
| INTRACELLULAR SIGNALING CASCADE | 647                 | 33 (5.1)              | 28 (4.3)             | 5 (0.8)                | <0.0001 | 0.0009 |
| IMMUNE SYSTEM PROCESS           | 324                 | 23 (7.1)              | 22 (6.8)             | 1 (0.3)                | <0.0001 | 0.0009 |
| IMMUNE RESPONSE                 | 231                 | 20 (8.7)              | 20 (8.7)             | 0 (0)                  | <0.0001 | 0.0009 |

| Category Name                                                     | Category<br>Genes # | Any-reg.<br>SDEG #(%) | Up-reg.<br>SDEG #(%) | Down-reg.<br>SDEG #(%) | P       | FDR    |
|-------------------------------------------------------------------|---------------------|-----------------------|----------------------|------------------------|---------|--------|
| PROTEIN KINASE CASCADE                                            | 285                 | 20 (7)                | 17 (6)               | 3 (1.1)                | <0.0001 | 0.0009 |
| DEFENSE RESPONSE                                                  | 262                 | 18 (6.9)              | 14 (5.3)             | 4 (1.5)                | <0.0001 | 0.0009 |
| RESPONSE TO WOUNDING                                              | 185                 | 13 (7)                | 9 (4.9)              | 4 (2.2)                | <0.0001 | 0.0009 |
| RESPONSE TO OTHER ORGANISM                                        | 79                  | 9 (11.4)              | 9 (11.4)             | 0 (0)                  | <0.0001 | 0.0009 |
| RESPONSE TO VIRUS                                                 | 47                  | 7 (14.9)              | 7 (14.9)             | 0 (0)                  | <0.0001 | 0.0009 |
| PROTEIN METABOLIC PROCESS                                         | 1185                | 43 (3.6)              | 34 (2.9)             | 9 (0.8)                | <0.0001 | 0.0012 |
| CELL PROLIFERATION GO 0008283                                     | 493                 | 24 (4.9)              | 20 (4.1)             | 4 (0.8)                | <0.0001 | 0.0012 |
| I KAPPAB KINASE NF KAPPAB CASCADE                                 | 113                 | 12 (10.6)             | 11 (9.7)             | 1 (0.9)                | <0.0001 | 0.0012 |
| MULTI ORGANISM PROCESS                                            | 157                 | 12 (7.6)              | 11 (7)               | 1 (0.6)                | <0.0001 | 0.0012 |
| REGULATION OF I KAPPAB KINASE NF KAPPAB CASCADE                   | 95                  | 10 (10.5)             | 9 (9.5)              | 1 (1.1)                | <0.0001 | 0.0012 |
| POSITIVE REGULATION OF I KAPPAB KINASE NF KAPPAB CASCADE          | 89                  | 9 (10.1)              | 8 (9)                | 1 (1.1)                | <0.0001 | 0.0027 |
| NUCLEOBASENUCLEOSIDENUCLEOTIDE AND NUCLEIC ACID METABOLIC PROCESS | 1196                | 41 (3.4)              | 37 (3.1)             | 4 (0.3)                | 0.0002  | 0.0082 |
| RESPONSE TO BIOTIC STIMULUS                                       | 117                 | 9 (7.7)               | 9 (7.7)              | 0 (0)                  | 0.0002  | 0.0087 |
| POSITIVE REGULATION OF SIGNAL TRANSDUCTION                        | 127                 | 10 (7.9)              | 8 (6.3)              | 2 (1.6)                | 0.0002  | 0.0092 |
| POSITIVE REGULATION OF BIOLOGICAL PROCESS                         | 690                 | 27 (3.9)              | 20 (2.9)             | 7 (1)                  | 0.0002  | 0.0093 |
| POSITIVE REGULATION OF CELLULAR PROCESS                           | 652                 | 26 (4)                | 20 (3.1)             | 6 (0.9)                | 0.0003  | 0.0093 |
| RESPONSE TO EXTERNAL STIMULUS                                     | 304                 | 15 (4.9)              | 11 (3.6)             | 4 (1.3)                | 0.0002  | 0.0093 |
| MEMBRANE ORGANIZATION AND BIOGENESIS                              | 135                 | 10 (7.4)              | 8 (5.9)              | 2 (1.5)                | 0.0002  | 0.0093 |
| INFLAMMATORY RESPONSE                                             | 129                 | 9 (7)                 | 7 (5.4)              | 2 (1.6)                | 0.0003  | 0.0093 |

**Table A90:** Significantly enriched MSigDB GO Biological Processes (RNA-Seq, Neutrophils, Day 1). Results sorted by FDR and #SDEG genes.

| Category Name    | Category<br>Genes # | Any-reg.<br>SDEG #(%) | Up-reg.<br>SDEG #(%) | Down-reg.<br>SDEG #(%) | P       | FDR    |
|------------------|---------------------|-----------------------|----------------------|------------------------|---------|--------|
| CYTOPLASM        | 2054                | 86 (4.2)              | 75 (3.7)             | 11 (0.5)               | <0.0001 | 0.0012 |
| CYTOPLASMIC PART | 1335                | 51 (3.8)              | 44 (3.3)             | 7 (0.5)                | <0.0001 | 0.0012 |
| LYSOSOME         | 57                  | 7 (12.3)              | 6 (10.5)             | 1 (1.8)                | <0.0001 | 0.0017 |
| LYTIC VACUOLE    | 57                  | 7 (12.3)              | 6 (10.5)             | 1 (1.8)                | <0.0001 | 0.0017 |
| VACUOLE          | 65                  | 7 (10.8)              | 6 (9.2)              | 1 (1.5)                | <0.0001 | 0.0047 |
| CELL FRACTION    | 480                 | 22 (4.6)              | 16 (3.3)             | 6 (1.2)                | 0.0001  | 0.005  |

**Table A91:** Significantly enriched MSigDB GO Cellular Components (RNA-Seq, Neutrophils, Day 1). Results sorted by FDR and #SDEG genes.

| Category Name             | Category<br>Genes # | Any-reg.<br>SDEG #(%) | Up-reg.<br>SDEG #(%) | Down-reg.<br>SDEG #(%) | P       | FDR   |
|---------------------------|---------------------|-----------------------|----------------------|------------------------|---------|-------|
| ENZYME REGULATOR ACTIVITY | 310                 | 20 (6.5)              | 17 (5.5)             | 3 (1)                  | <0.0001 | 0.004 |

**Table A92:** Significantly enriched MSigDB GO Molecular Functions (RNA-Seq, Neutrophils, Day 1). Results sorted by FDR and #SDEG genes.

| Category Name                                      | Category<br>Genes # | Any-reg.<br>SDEG #(%) | Up-reg.<br>SDEG #(%) | Down-reg.<br>SDEG #(%) | P       | FDR    |
|----------------------------------------------------|---------------------|-----------------------|----------------------|------------------------|---------|--------|
| NUYTEN EZH2 TARGETS UP                             | 1002                | 104 (10.4)            | 93 (9.3)             | 11 (1.1)               | <0.0001 | 0.0002 |
| NUYTEN NIPP1 TARGETS UP                            | 748                 | 74 (9.9)              | 69 (9.2)             | 5 (0.7)                | <0.0001 | 0.0002 |
| CHEN METABOLIC SYNDROM NETWORK                     | 1172                | 71 (6.1)              | 60 (5.1)             | 11 (0.9)               | <0.0001 | 0.0002 |
| GRAESSMANN APOPTOSIS BY DOXORUBICIN UP             | 1132                | 70 (6.2)              | 56 (4.9)             | 14 (1.2)               | <0.0001 | 0.0002 |
| FULCHER INFLAMMATORY RESPONSE LECTIN VS LPS DN     | 462                 | 67 (14.5)             | 63 (13.6)            | 4 (0.9)                | <0.0001 | 0.0002 |
| BLALOCK ALZHEIMERS DISEASE UP                      | 1628                | 66 (4.1)              | 54 (3.3)             | 12 (0.7)               | <0.0001 | 0.0002 |
| DODD NASOPHARYNGEAL CARCINOMA DN                   | 1330                | 61 (4.6)              | 53 (4)               | 8 (0.6)                | <0.0001 | 0.0002 |
| ZWANG TRANSIENTLY UP BY 1ST EGF PULSE ONLY         | 1723                | 60 (3.5)              | 51 (3)               | 9 (0.5)                | <0.0001 | 0.0002 |
| TAKEDA TARGETS OF NUP98 HOXA9 FUSION 3D UP         | 178                 | 51 (28.7)             | 50 (28.1)            | 1 (0.6)                | <0.0001 | 0.0002 |
| PUJANA ATM PCC NETWORK                             | 1390                | 50 (3.6)              | 42 (3)               | 8 (0.6)                | <0.0001 | 0.0002 |
| GRAESSMANN APOPTOSIS BY SERUM DEPRIVATION UP       | 541                 | 49 (9.1)              | 46 (8.5)             | 3 (0.6)                | <0.0001 | 0.0002 |
| WALLACE PROSTATE CANCER RACE UP                    | 275                 | 49 (17.8)             | 46 (16.7)            | 3 (1.1)                | <0.0001 | 0.0002 |
| KRIGE RESPONSE TO TOSEDOSTAT 6HR UP                | 915                 | 47 (5.1)              | 40 (4.4)             | 7 (0.8)                | <0.0001 | 0.0002 |
| ONKEN UVEAL MELANOMA UP                            | 763                 | 47 (6.2)              | 39 (5.1)             | 8 (1)                  | <0.0001 | 0.0002 |
| FEVR CTNNB1 TARGETS UP                             | 672                 | 46 (6.8)              | 42 (6.2)             | 4 (0.6)                | <0.0001 | 0.0002 |
| FOSTER TOLERANT MACROPHAGE DN                      | 405                 | 46 (11.4)             | 42 (10.4)            | 4 (1)                  | <0.0001 | 0.0002 |
| BOSCO INTERFERON INDUCED ANTIVIRAL MODULE          | 76                  | 45 (59.2)             | 45 (59.2)            | 0 (0)                  | <0.0001 | 0.0002 |
| PEREZ TP53 TARGETS                                 | 1124                | 45 (4)                | 34 (3)               | 11 (1)                 | <0.0001 | 0.0002 |
| RODWELL AGING KIDNEY UP                            | 465                 | 45 (9.7)              | 38 (8.2)             | 7 (1.5)                | <0.0001 | 0.0002 |
| HECKER IFNB1 TARGETS                               | 92                  | 44 (47.8)             | 43 (46.7)            | 1 (1.1)                | <0.0001 | 0.0002 |
| GOZGIT ESR1 TARGETS DN                             | 741                 | 43 (5.8)              | 38 (5.1)             | 5 (0.7)                | <0.0001 | 0.0002 |
| MEISSNER BRAIN HCP WITH H3K4ME3 AND H3K27ME3       | 1060                | 43 (4.1)              | 31 (2.9)             | 12 (1.1)               | <0.0001 | 0.0002 |
| ACEVEDO LIVER CANCER UP                            | 947                 | 42 (4.4)              | 33 (3.5)             | 9 (1)                  | <0.0001 | 0.0002 |
| JISON SICKLE CELL DISEASE UP                       | 174                 | 42 (24.1)             | 40 (23)              | 2 (1.1)                | <0.0001 | 0.0002 |
| SANA RESPONSE TO IFNG UP                           | 74                  | 41 (55.4)             | 41 (55.4)            | 0 (0)                  | <0.0001 | 0.0002 |
| BROWNE INTERFERON RESPONSIVE GENES                 | 68                  | 40 (58.8)             | 40 (58.8)            | 0 (0)                  | <0.0001 | 0.0002 |
| KRIGE RESPONSE TO TOSEDOSTAT 24HR DN               | 993                 | 40 (4)                | 28 (2.8)             | 12 (1.2)               | <0.0001 | 0.0002 |
| CHICAS RB1 TARGETS SENESCENT                       | 552                 | 39 (7.1)              | 32 (5.8)             | 7 (1.3)                | <0.0001 | 0.0002 |
| KRIGE RESPONSE TO TOSEDOSTAT 24HR UP               | 740                 | 39 (5.3)              | 33 (4.5)             | 6 (0.8)                | <0.0001 | 0.0002 |
| TAKEDA TARGETS OF NUP98 HOXA9 FUSION 10D UP        | 186                 | 39 (21)               | 37 (19.9)            | 2 (1.1)                | <0.0001 | 0.0002 |
| LOPEZ MBD TARGETS                                  | 925                 | 38 (4.1)              | 30 (3.2)             | 8 (0.9)                | <0.0001 | 0.0002 |
| DEBIASI APOPTOSIS BY REOVIRUS INFECTION UP         | 317                 | 37 (11.7)             | 36 (11.4)            | 1 (0.3)                | <0.0001 | 0.0002 |
| FORTSCHEGGER PHF8 TARGETS DN                       | 749                 | 36 (4.8)              | 33 (4.4)             | 3 (0.4)                | <0.0001 | 0.0002 |
| BERTUCCI MEDULLARY VS DUCTAL BREAST CANCER UP      | 200                 | 35 (17.5)             | 34 (17)              | 1 (0.5)                | <0.0001 | 0.0002 |
| GRAESSMANN RESPONSE TO MC AND SERUM DEPRIVATION UP | 203                 | 35 (17.2)             | 34 (16.7)            | 1 (0.5)                | <0.0001 | 0.0002 |
| HELLER SILENCED BY METHYLATION UP                  | 273                 | 35 (12.8)             | 33 (12.1)            | 2 (0.7)                | <0.0001 | 0.0002 |
| LEE BMP2 TARGETS UP                                | 723                 | 35 (4.8)              | 26 (3.6)             | 9 (1.2)                | <0.0001 | 0.0002 |
| ZHOU INFLAMMATORY RESPONSE LPS UP                  | 401                 | 35 (8.7)              | 32 (8)               | 3 (0.7)                | <0.0001 | 0.0002 |

| Category Name                                       | Category<br>Genes # | Any-reg.<br>SDEG #(%) | Up-reg.<br>SDEG #(%) | Down-reg.<br>SDEG #(%) | P       | FDR    |
|-----------------------------------------------------|---------------------|-----------------------|----------------------|------------------------|---------|--------|
| JOHNSTONE PARVB TARGETS 3 UP                        | 425                 | 33 (7.8)              | 29 (6.8)             | 4 (0.9)                | <0.0001 | 0.0002 |
| KRIEG HYPOXIA NOT VIA KDM3A                         | 718                 | 33 (4.6)              | 21 (2.9)             | 12 (1.7)               | <0.0001 | 0.0002 |
| MARKEY RB1 ACUTE LOF UP                             | 214                 | 33 (15.4)             | 31 (14.5)            | 2 (0.9)                | <0.0001 | 0.0002 |
| RUTELLA RESPONSE TO HGF VS CSF2RB AND IL4 UP        | 391                 | 33 (8.4)              | 26 (6.6)             | 7 (1.8)                | <0.0001 | 0.0002 |
| SMID BREAST CANCER NORMAL LIKE UP                   | 443                 | 33 (7.4)              | 25 (5.6)             | 8 (1.8)                | <0.0001 | 0.0002 |
| YANG BCL3 TARGETS UP                                | 351                 | 33 (9.4)              | 29 (8.3)             | 4 (1.1)                | <0.0001 | 0.0002 |
| ZHANG RESPONSE TO IKK INHIBITOR AND TNF UP          | 221                 | 33 (14.9)             | 30 (13.6)            | 3 (1.4)                | <0.0001 | 0.0002 |
| BUYTAERT PHOTODYNAMIC THERAPY STRESS DN             | 618                 | 32 (5.2)              | 23 (3.7)             | 9 (1.5)                | <0.0001 | 0.0002 |
| DER IFN BETA RESPONSE UP                            | 101                 | 32 (31.7)             | 32 (31.7)            | 0 (0)                  | <0.0001 | 0.0002 |
| ONDER CDH1 TARGETS 2 DN                             | 454                 | 32 (7)                | 22 (4.8)             | 10 (2.2)               | <0.0001 | 0.0002 |
| RUTELLA RESPONSE TO HGF UP                          | 398                 | 32 (8)                | 28 (7)               | 4 (1)                  | <0.0001 | 0.0002 |
| BAELDE DIABETIC NEPHROPATHY DN                      | 425                 | 31 (7.3)              | 28 (6.6)             | 3 (0.7)                | <0.0001 | 0.0002 |
| COLINA TARGETS OF 4EBP1 AND 4EBP2                   | 339                 | 31 (9.1)              | 30 (8.8)             | 1 (0.3)                | <0.0001 | 0.0002 |
| TAKEDA TARGETS OF NUP98 HOXA9 FUSION 8D UP          | 155                 | 31 (20)               | 30 (19.4)            | 1 (0.6)                | <0.0001 | 0.0002 |
| CHICAS RB1 TARGETS CONFLUENT                        | 550                 | 30 (5.5)              | 24 (4.4)             | 6 (1.1)                | <0.0001 | 0.0002 |
| FULCHER INFLAMMATORY RESPONSE LECTIN VS LPS UP      | 564                 | 30 (5.3)              | 18 (3.2)             | 12 (2.1)               | <0.0001 | 0.0002 |
| ICHIBA GRAFT VERSUS HOST DISEASE D7 UP              | 105                 | 30 (28.6)             | 30 (28.6)            | 0 (0)                  | <0.0001 | 0.0002 |
| ZHENG BOUND BY FOXP3                                | 483                 | 30 (6.2)              | 21 (4.3)             | 9 (1.9)                | <0.0001 | 0.0002 |
| DER IFN ALPHA RESPONSE UP                           | 74                  | 29 (39.2)             | 29 (39.2)            | 0 (0)                  | <0.0001 | 0.0002 |
| HAN SATB1 TARGETS DN                                | 421                 | 29 (6.9)              | 24 (5.7)             | 5 (1.2)                | <0.0001 | 0.0002 |
| TAKEDA TARGETS OF NUP98 HOXA9 FUSION 16D UP         | 169                 | 29 (17.2)             | 26 (15.4)            | 3 (1.8)                | <0.0001 | 0.0002 |
| BOQUEST STEM CELL CULTURED VS FRESH UP              | 409                 | 28 (6.8)              | 23 (5.6)             | 5 (1.2)                | <0.0001 | 0.0002 |
| LI INDUCED T TO NATURAL KILLER UP                   | 302                 | 28 (9.3)              | 22 (7.3)             | 6 (2)                  | <0.0001 | 0.0002 |
| MITSIADES RESPONSE TO APLIDIN UP                    | 450                 | 28 (6.2)              | 26 (5.8)             | 2 (0.4)                | <0.0001 | 0.0002 |
| SWEET LUNG CANCER KRAS UP                           | 482                 | 28 (5.8)              | 23 (4.8)             | 5 (1)                  | <0.0001 | 0.0002 |
| WANG RESPONSE TO GSK3 INHIBITOR SB216763 UP         | 378                 | 28 (7.4)              | 26 (6.9)             | 2 (0.5)                | <0.0001 | 0.0002 |
| DAUER STAT3 TARGETS DN                              | 51                  | 27 (52.9)             | 26 (51)              | 1 (2)                  | <0.0001 | 0.0002 |
| DOUGLAS BMI1 TARGETS DN                             | 308                 | 27 (8.8)              | 26 (8.4)             | 1 (0.3)                | <0.0001 | 0.0002 |
| HOLLMANN APOPTOSIS VIA CD40 DN                      | 259                 | 27 (10.4)             | 23 (8.9)             | 4 (1.5)                | <0.0001 | 0.0002 |
| HORIUCHI WTAP TARGETS UP                            | 295                 | 27 (9.2)              | 23 (7.8)             | 4 (1.4)                | <0.0001 | 0.0002 |
| IVANOVA HEMATOPOIESIS LATE PROGENITOR               | 534                 | 27 (5.1)              | 23 (4.3)             | 4 (0.7)                | <0.0001 | 0.0002 |
| MOSERLE IFNA RESPONSE                               | 31                  | 27 (87.1)             | 27 (87.1)            | 0 (0)                  | <0.0001 | 0.0002 |
| SATO SILENCED BY METHYLATION IN PANCREATIC CANCER 1 | 412                 | 27 (6.6)              | 24 (5.8)             | 3 (0.7)                | <0.0001 | 0.0002 |
| SCHUETZ BREAST CANCER DUCTAL INVASIVE UP            | 338                 | 27 (8)                | 24 (7.1)             | 3 (0.9)                | <0.0001 | 0.0002 |
| WIELAND UP BY HBV INFECTION                         | 100                 | 27 (27)               | 27 (27)              | 0 (0)                  | <0.0001 | 0.0002 |
| BOQUEST STEM CELL DN                                | 213                 | 26 (12.2)             | 19 (8.9)             | 7 (3.3)                | <0.0001 | 0.0002 |
| CHARAFE BREAST CANCER LUMINAL VS BASAL DN           | 440                 | 26 (5.9)              | 24 (5.5)             | 2 (0.5)                | <0.0001 | 0.0002 |
| DER IFN GAMMA RESPONSE UP                           | 72                  | 26 (36.1)             | 26 (36.1)            | 0 (0)                  | <0.0001 | 0.0002 |

| Category Name                                         | Category<br>Genes # | Any-reg.<br>SDEG #(%) | Up-reg.<br>SDEG #(%) | Down-reg.<br>SDEG #(%) | P       | FDR    |
|-------------------------------------------------------|---------------------|-----------------------|----------------------|------------------------|---------|--------|
| GARY CD5 TARGETS UP                                   | 458                 | 26 (5.7)              | 22 (4.8)             | 4 (0.9)                | <0.0001 | 0.0002 |
| LINDGREN BLADDER CANCER CLUSTER 2B                    | 376                 | 26 (6.9)              | 25 (6.6)             | 1 (0.3)                | <0.0001 | 0.0002 |
| SMID BREAST CANCER LUMINAL B DN                       | 513                 | 26 (5.1)              | 22 (4.3)             | 4 (0.8)                | <0.0001 | 0.0002 |
| ALTEMEIER RESPONSE TO LPS WITH MECHANICAL VENTILATION | 126                 | 25 (19.8)             | 24 (19)              | 1 (0.8)                | <0.0001 | 0.0002 |
| GRUETZMANN PANCREATIC CANCER UP                       | 351                 | 25 (7.1)              | 23 (6.6)             | 2 (0.6)                | <0.0001 | 0.0002 |
| KUMAR TARGETS OF MLL AF9 FUSION                       | 389                 | 25 (6.4)              | 20 (5.1)             | 5 (1.3)                | <0.0001 | 0.0002 |
| ODONNELL TFRC TARGETS UP                              | 409                 | 25 (6.1)              | 17 (4.2)             | 8 (2)                  | <0.0001 | 0.0002 |
| DELYS THYROID CANCER UP                               | 435                 | 24 (5.5)              | 16 (3.7)             | 8 (1.8)                | <0.0001 | 0.0002 |
| LIM MAMMARY STEM CELL DN                              | 422                 | 24 (5.7)              | 19 (4.5)             | 5 (1.2)                | <0.0001 | 0.0002 |
| PEDRIOLI MIR31 TARGETS DN                             | 398                 | 24 (6)                | 18 (4.5)             | 6 (1.5)                | <0.0001 | 0.0002 |
| RIGGI EWING SARCOMA PROGENITOR UP                     | 429                 | 24 (5.6)              | 17 (4)               | 7 (1.6)                | <0.0001 | 0.0002 |
| RUTELLA RESPONSE TO CSF2RB AND IL4 DN                 | 303                 | 24 (7.9)              | 19 (6.3)             | 5 (1.7)                | <0.0001 | 0.0002 |
| HIRSCH CELLULAR TRANSFORMATION SIGNATURE UP           | 239                 | 23 (9.6)              | 21 (8.8)             | 2 (0.8)                | <0.0001 | 0.0002 |
| SENGUPTA NASOPHARYNGEAL CARCINOMA WITH LMP1 UP        | 387                 | 23 (5.9)              | 20 (5.2)             | 3 (0.8)                | <0.0001 | 0.0002 |
| WANG SMARCE1 TARGETS DN                               | 340                 | 23 (6.8)              | 17 (5)               | 6 (1.8)                | <0.0001 | 0.0002 |
| DACOSTA UV RESPONSE VIA ERCC3 UP                      | 301                 | 22 (7.3)              | 17 (5.6)             | 5 (1.7)                | <0.0001 | 0.0002 |
| GOLDRATH ANTIGEN RESPONSE                             | 333                 | 22 (6.6)              | 19 (5.7)             | 3 (0.9)                | <0.0001 | 0.0002 |
| RADAEVA RESPONSE TO IFNA1 UP                          | 52                  | 22 (42.3)             | 22 (42.3)            | 0 (0)                  | <0.0001 | 0.0002 |
| RIGGINS TAMOXIFEN RESISTANCE DN                       | 215                 | 22 (10.2)             | 19 (8.8)             | 3 (1.4)                | <0.0001 | 0.0002 |
| SANSOM APC TARGETS DN                                 | 359                 | 22 (6.1)              | 21 (5.8)             | 1 (0.3)                | <0.0001 | 0.0002 |
| ACEVEDO FGFR1 TARGETS IN PROSTATE CANCER MODEL UP     | 278                 | 21 (7.6)              | 14 (5)               | 7 (2.5)                | <0.0001 | 0.0002 |
| BOYLAN MULTIPLE MYELOMA C D DN                        | 244                 | 21 (8.6)              | 17 (7)               | 4 (1.6)                | <0.0001 | 0.0002 |
| QI PLASMACYTOMA UP                                    | 251                 | 21 (8.4)              | 20 (8)               | 1 (0.4)                | <0.0001 | 0.0002 |
| SANA TNF SIGNALING UP                                 | 81                  | 21 (25.9)             | 19 (23.5)            | 2 (2.5)                | <0.0001 | 0.0002 |
| SEITZ NEOPLASTIC TRANSFORMATION BY 8P DELETION UP     | 69                  | 21 (30.4)             | 21 (30.4)            | 0 (0)                  | <0.0001 | 0.0002 |
| VERHAAK AML WITH NPM1 MUTATED DN                      | 238                 | 21 (8.8)              | 15 (6.3)             | 6 (2.5)                | <0.0001 | 0.0002 |
| RICKMAN METASTASIS DN                                 | 258                 | 20 (7.8)              | 18 (7)               | 2 (0.8)                | <0.0001 | 0.0002 |
| SENGUPTA NASOPHARYNGEAL CARCINOMA UP                  | 287                 | 20 (7)                | 19 (6.6)             | 1 (0.3)                | <0.0001 | 0.0002 |
| STAMBOLSKY TARGETS OF MUTATED TP53 DN                 | 51                  | 20 (39.2)             | 19 (37.3)            | 1 (2)                  | <0.0001 | 0.0002 |
| WIERENGA STAT5A TARGETS UP                            | 210                 | 20 (9.5)              | 13 (6.2)             | 7 (3.3)                | <0.0001 | 0.0002 |
| ZHU CMV ALL UP                                        | 121                 | 20 (16.5)             | 20 (16.5)            | 0 (0)                  | <0.0001 | 0.0002 |
| EINAV INTERFERON SIGNATURE IN CANCER                  | 27                  | 19 (70.4)             | 19 (70.4)            | 0 (0)                  | <0.0001 | 0.0002 |
| MCLACHLAN DENTAL CARIES UP                            | 227                 | 19 (8.4)              | 17 (7.5)             | 2 (0.9)                | <0.0001 | 0.0002 |
| ROZANOV MMP14 TARGETS UP                              | 270                 | 19 (7)                | 15 (5.6)             | 4 (1.5)                | <0.0001 | 0.0002 |
| BENNETT SYSTEMIC LUPUS ERYTHEMATOSUS                  | 32                  | 18 (56.2)             | 18 (56.2)            | 0 (0)                  | <0.0001 | 0.0002 |
| BOSCO ALLERGEN INDUCED TH2 ASSOCIATED MODULE          | 160                 | 18 (11.2)             | 14 (8.8)             | 4 (2.5)                | <0.0001 | 0.0002 |
| HOSHIDA LIVER CANCER SUBCLASS S1                      | 225                 | 18 (8)                | 16 (7.1)             | 2 (0.9)                | <0.0001 | 0.0002 |
| ICHIBA GRAFT VERSUS HOST DISEASE 35D UP               | 126                 | 18 (14.3)             | 18 (14.3)            | 0 (0)                  | <0.0001 | 0.0002 |

| Category Name                                       | Category<br>Genes # | Any-reg.<br>SDEG #(%) | Up-reg.<br>SDEG #(%) | Down-reg.<br>SDEG #(%) | P       | FDR    |
|-----------------------------------------------------|---------------------|-----------------------|----------------------|------------------------|---------|--------|
| LEI MYB TARGETS                                     | 307                 | 18 (5.9)              | 14 (4.6)             | 4 (1.3)                | <0.0001 | 0.0002 |
| LU EZH2 TARGETS UP                                  | 289                 | 18 (6.2)              | 16 (5.5)             | 2 (0.7)                | <0.0001 | 0.0002 |
| MCLACHLAN DENTAL CARIES DN                          | 219                 | 18 (8.2)              | 16 (7.3)             | 2 (0.9)                | <0.0001 | 0.0002 |
| TONKS TARGETS OF RUNX1 RUNX1T1 FUSION MONOCYTE UP   | 201                 | 18 (9)                | 14 (7)               | 4 (2)                  | <0.0001 | 0.0002 |
| UROSEVIC RESPONSE TO IMIQUIMOD                      | 23                  | 18 (78.3)             | 18 (78.3)            | 0 (0)                  | <0.0001 | 0.0002 |
| DOANE RESPONSE TO ANDROGEN DN                       | 232                 | 17 (7.3)              | 11 (4.7)             | 6 (2.6)                | <0.0001 | 0.0002 |
| WUNDER INFLAMMATORY RESPONSE AND CHOLESTEROL UP     | 61                  | 17 (27.9)             | 16 (26.2)            | 1 (1.6)                | <0.0001 | 0.0002 |
| ZHANG INTERFERON RESPONSE                           | 23                  | 17 (73.9)             | 17 (73.9)            | 0 (0)                  | <0.0001 | 0.0002 |
| ALCALAY AML BY NPM1 LOCALIZATION DN                 | 178                 | 16 (9)                | 14 (7.9)             | 2 (1.1)                | <0.0001 | 0.0002 |
| BOWIE RESPONSE TO EXTRACELLULAR MATRIX              | 17                  | 16 (94.1)             | 16 (94.1)            | 0 (0)                  | <0.0001 | 0.0002 |
| FOSTER KDM1A TARGETS UP                             | 250                 | 16 (6.4)              | 14 (5.6)             | 2 (0.8)                | <0.0001 | 0.0002 |
| FOSTER TOLERANT MACROPHAGE UP                       | 155                 | 16 (10.3)             | 15 (9.7)             | 1 (0.6)                | <0.0001 | 0.0002 |
| JOHNSTONE PARVB TARGETS 2 UP                        | 136                 | 16 (11.8)             | 16 (11.8)            | 0 (0)                  | <0.0001 | 0.0002 |
| KRIEG KDM3A TARGETS NOT HYPOXIA                     | 189                 | 16 (8.5)              | 15 (7.9)             | 1 (0.5)                | <0.0001 | 0.0002 |
| MISSIAGLIA REGULATED BY METHYLATION UP              | 120                 | 16 (13.3)             | 14 (11.7)            | 2 (1.7)                | <0.0001 | 0.0002 |
| TONKS TARGETS OF RUNX1 RUNX1T1 FUSION HSC UP        | 180                 | 16 (8.9)              | 12 (6.7)             | 4 (2.2)                | <0.0001 | 0.0002 |
| BOSCO TH1 CYTOTOXIC MODULE                          | 114                 | 15 (13.2)             | 15 (13.2)            | 0 (0)                  | <0.0001 | 0.0002 |
| BOWIE RESPONSE TO TAMOXIFEN                         | 18                  | 15 (83.3)             | 15 (83.3)            | 0 (0)                  | <0.0001 | 0.0002 |
| BROCKE APOPTOSIS REVERSED BY IL6                    | 144                 | 15 (10.4)             | 13 (9)               | 2 (1.4)                | <0.0001 | 0.0002 |
| FARMER BREAST CANCER CLUSTER 1                      | 39                  | 15 (38.5)             | 15 (38.5)            | 0 (0)                  | <0.0001 | 0.0002 |
| FLECHNER BIOPSY KIDNEY TRANSPLANT REJECTED VS OK UP | 85                  | 15 (17.6)             | 13 (15.3)            | 2 (2.4)                | <0.0001 | 0.0002 |
| KRASNOSELSKAYA ILF3 TARGETS UP                      | 37                  | 15 (40.5)             | 15 (40.5)            | 0 (0)                  | <0.0001 | 0.0002 |
| LIANG SILENCED BY METHYLATION 2                     | 55                  | 15 (27.3)             | 13 (23.6)            | 2 (3.6)                | <0.0001 | 0.0002 |
| SEKI INFLAMMATORY RESPONSE LPS UP                   | 77                  | 15 (19.5)             | 14 (18.2)            | 1 (1.3)                | <0.0001 | 0.0002 |
| ZHANG TLX TARGETS 36HR UP                           | 219                 | 15 (6.8)              | 11 (5)               | 4 (1.8)                | <0.0001 | 0.0002 |
| ZHU CMV 8 HR UP                                     | 48                  | 15 (31.2)             | 15 (31.2)            | 0 (0)                  | <0.0001 | 0.0002 |
| VERHAAK AML WITH NPM1 MUTATED UP                    | 190                 | 14 (7.4)              | 11 (5.8)             | 3 (1.6)                | <0.0001 | 0.0002 |
| ZHU CMV 24 HR UP                                    | 93                  | 14 (15.1)             | 14 (15.1)            | 0 (0)                  | <0.0001 | 0.0002 |
| BASSO CD40 SIGNALING UP                             | 99                  | 13 (13.1)             | 11 (11.1)            | 2 (2)                  | <0.0001 | 0.0002 |
| FURUKAWA DUSP6 TARGETS PCI35 UP                     | 73                  | 13 (17.8)             | 12 (16.4)            | 1 (1.4)                | <0.0001 | 0.0002 |
| KIM GLIS2 TARGETS UP                                | 84                  | 13 (15.5)             | 13 (15.5)            | 0 (0)                  | <0.0001 | 0.0002 |
| LENAOUR DENDRITIC CELL MATURATION UP                | 112                 | 12 (10.7)             | 10 (8.9)             | 2 (1.8)                | <0.0001 | 0.0002 |
| LIU VAV3 PROSTATE CARCINOGENESIS UP                 | 85                  | 12 (14.1)             | 10 (11.8)            | 2 (2.4)                | <0.0001 | 0.0002 |
| MORI MATURE B LYMPHOCYTE UP                         | 89                  | 12 (13.5)             | 9 (10.1)             | 3 (3.4)                | <0.0001 | 0.0002 |
| ZHAN MULTIPLE MYELOMA LB DN                         | 39                  | 12 (30.8)             | 12 (30.8)            | 0 (0)                  | <0.0001 | 0.0002 |
| BROWNE HCMV INFECTION 6HR UP                        | 69                  | 11 (15.9)             | 10 (14.5)            | 1 (1.4)                | <0.0001 | 0.0002 |
| BROWNE HCMV INFECTION 8HR UP                        | 102                 | 11 (10.8)             | 9 (8.8)              | 2 (2)                  | <0.0001 | 0.0002 |
| GERY CEBP TARGETS                                   | 137                 | 11 (8)                | 9 (6.6)              | 2 (1.5)                | <0.0001 | 0.0002 |

| Category Name                                      | Category | Any-reg.  | Up-reg.   | Down-reg. | P       | FDR    |
|----------------------------------------------------|----------|-----------|-----------|-----------|---------|--------|
|                                                    | Genes #  | SDEG #(%) | SDEG #(%) | SDEG #(%) |         |        |
| GRANDVAUX IFN RESPONSE NOT VIA IRF3                | 14       | 11 (78.6) | 11 (78.6) | 0 (0)     | <0.0001 | 0.0002 |
| KIM LRRC3B TARGETS                                 | 30       | 11 (36.7) | 11 (36.7) | 0 (0)     | <0.0001 | 0.0002 |
| NEMETH INFLAMMATORY RESPONSE LPS UP                | 85       | 11 (12.9) | 11 (12.9) | 0 (0)     | <0.0001 | 0.0002 |
| ODONNELL TARGETS OF MYC AND TFRC UP                | 78       | 11 (14.1) | 8 (10.3)  | 3 (3.8)   | <0.0001 | 0.0002 |
| SAGIV CD24 TARGETS DN                              | 46       | 11 (23.9) | 7 (15.2)  | 4 (8.7)   | <0.0001 | 0.0002 |
| BECKER TAMOXIFEN RESISTANCE UP                     | 49       | 10 (20.4) | 10 (20.4) | 0 (0)     | <0.0001 | 0.0002 |
| BEIER GLIOMA STEM CELL DN                          | 63       | 10 (15.9) | 10 (15.9) | 0 (0)     | <0.0001 | 0.0002 |
| CHANG IMMORTALIZED BY HPV31 DN                     | 63       | 10 (15.9) | 10 (15.9) | 0 (0)     | <0.0001 | 0.0002 |
| GAURNIER PSMD4 TARGETS                             | 68       | 10 (14.7) | 9 (13.2)  | 1 (1.5)   | <0.0001 | 0.0002 |
| XU AKT1 TARGETS 6HR                                | 27       | 10 (37)   | 10 (37)   | 0 (0)     | <0.0001 | 0.0002 |
| CASTELLANO NRAS TARGETS UP                         | 68       | 9 (13.2)  | 9 (13.2)  | 0 (0)     | <0.0001 | 0.0002 |
| DEMAGALHAES AGING UP                               | 56       | 9 (16.1)  | 6 (10.7)  | 3 (5.4)   | <0.0001 | 0.0002 |
| GEISS RESPONSE TO DSRNA UP                         | 35       | 9 (25.7)  | 9 (25.7)  | 0 (0)     | <0.0001 | 0.0002 |
| HOFFMANN SMALL PRE BII TO IMMATURE B LYMPHOCYTE UP | 70       | 9 (12.9)  | 8 (11.4)  | 1 (1.4)   | <0.0001 | 0.0002 |
| JECHLINGER EPITHELIAL TO MESENCHYMAL TRANSITION UP | 71       | 9 (12.7)  | 8 (11.3)  | 1 (1.4)   | <0.0001 | 0.0002 |
| ROETH TERT TARGETS UP                              | 14       | 9 (64.3)  | 9 (64.3)  | 0 (0)     | <0.0001 | 0.0002 |
| TAVOR CEBPA TARGETS UP                             | 47       | 9 (19.1)  | 6 (12.8)  | 3 (6.4)   | <0.0001 | 0.0002 |
| ZHANG ANTIVIRAL RESPONSE TO RIBAVIRIN UP           | 29       | 9 (31)    | 9 (31)    | 0 (0)     | <0.0001 | 0.0002 |
| DACOSTA UV RESPONSE VIA ERCC3 TTD UP               | 60       | 8 (13.3)  | 7 (11.7)  | 1 (1.7)   | <0.0001 | 0.0002 |
| FAELT B CLL WITH VH REARRANGEMENTS UP              | 46       | 8 (17.4)  | 6 (13)    | 2 (4.3)   | <0.0001 | 0.0002 |
| GRANDVAUX IRF3 TARGETS UP                          | 15       | 8 (53.3)  | 8 (53.3)  | 0 (0)     | <0.0001 | 0.0002 |
| LEE LIVER CANCER MYC E2F1 UP                       | 56       | 8 (14.3)  | 7 (12.5)  | 1 (1.8)   | <0.0001 | 0.0002 |
| MUELLER COMMON TARGETS OF AML FUSIONS DN           | 42       | 8 (19)    | 7 (16.7)  | 1 (2.4)   | <0.0001 | 0.0002 |
| PELLICCIOTTA HDAC IN ANTIGEN PRESENTATION DN       | 51       | 8 (15.7)  | 8 (15.7)  | 0 (0)     | <0.0001 | 0.0002 |
| XU HGF TARGETS INDUCED BY AKT1 6HR                 | 18       | 8 (44.4)  | 8 (44.4)  | 0 (0)     | <0.0001 | 0.0002 |
| YU MYC TARGETS DN                                  | 51       | 8 (15.7)  | 8 (15.7)  | 0 (0)     | <0.0001 | 0.0002 |
| FUJII YBX1 TARGETS UP                              | 40       | 7 (17.5)  | 6 (15)    | 1 (2.5)   | <0.0001 | 0.0002 |
| HAN JNK SINGALING UP                               | 34       | 7 (20.6)  | 6 (17.6)  | 1 (2.9)   | <0.0001 | 0.0002 |
| KAAB FAILED HEART VENTRICLE DN                     | 41       | 7 (17.1)  | 6 (14.6)  | 1 (2.4)   | <0.0001 | 0.0002 |
| MAHADEVAN RESPONSE TO MP470 UP                     | 19       | 7 (36.8)  | 5 (26.3)  | 2 (10.5)  | <0.0001 | 0.0002 |
| TSAI DNAJB4 TARGETS UP                             | 13       | 7 (53.8)  | 7 (53.8)  | 0 (0)     | <0.0001 | 0.0002 |
| TSAI RESPONSE TO RADIATION THERAPY                 | 32       | 7 (21.9)  | 7 (21.9)  | 0 (0)     | <0.0001 | 0.0002 |
| YAN ESCAPE FROM ANOIKIS                            | 24       | 7 (29.2)  | 7 (29.2)  | 0 (0)     | <0.0001 | 0.0002 |
| HU GENOTOXIC DAMAGE 24HR                           | 35       | 6 (17.1)  | 4 (11.4)  | 2 (5.7)   | <0.0001 | 0.0002 |
| IIZUKA LIVER CANCER PROGRESSION G1 G2 UP           | 12       | 5 (41.7)  | 5 (41.7)  | 0 (0)     | <0.0001 | 0.0002 |
| WATANABE ULCERATIVE COLITIS WITH CANCER DN         | 13       | 5 (38.5)  | 5 (38.5)  | 0 (0)     | <0.0001 | 0.0002 |
| MULLIGHAN MLL SIGNATURE 1 UP                       | 375      | 20 (5.3)  | 14 (3.7)  | 6 (1.6)   | <0.0001 | 0.0003 |
| MIKKELSEN MCV6 LCP WITH H3K4ME3                    | 153      | 13 (8.5)  | 12 (7.8)  | 1 (0.7)   | <0.0001 | 0.0003 |

| Category Name                                        | Category<br>Genes # | Any-reg.<br>SDEG #(%) | Up-reg.<br>SDEG #(%) | Down-reg.<br>SDEG #(%) | P       | FDR    |
|------------------------------------------------------|---------------------|-----------------------|----------------------|------------------------|---------|--------|
| AMIT SERUM RESPONSE 120 MCF10A                       | 64                  | 9 (14.1)              | 9 (14.1)             | 0 (0)                  | <0.0001 | 0.0003 |
| MAHAJAN RESPONSE TO IL1A UP                          | 79                  | 9 (11.4)              | 8 (10.1)             | 1 (1.3)                | <0.0001 | 0.0003 |
| BROWNE HCMV INFECTION 4HR UP                         | 53                  | 8 (15.1)              | 8 (15.1)             | 0 (0)                  | <0.0001 | 0.0003 |
| HOFFMANN IMMATURE TO MATURE B LYMPHOCYTE UP          | 44                  | 8 (18.2)              | 7 (15.9)             | 1 (2.3)                | <0.0001 | 0.0003 |
| LINDSTEDT DENDRITIC CELL MATURATION B                | 51                  | 8 (15.7)              | 8 (15.7)             | 0 (0)                  | <0.0001 | 0.0003 |
| BAUS TFF2 TARGETS UP                                 | 32                  | 6 (18.8)              | 6 (18.8)             | 0 (0)                  | <0.0001 | 0.0003 |
| KRIGE RESPONSE TO TOSEDOSTAT 6HR DN                  | 886                 | 35 (4)                | 24 (2.7)             | 11 (1.2)               | <0.0001 | 0.0005 |
| SMID BREAST CANCER BASAL UP                          | 607                 | 28 (4.6)              | 23 (3.8)             | 5 (0.8)                | <0.0001 | 0.0005 |
| POOLA INVASIVE BREAST CANCER UP                      | 272                 | 18 (6.6)              | 17 (6.2)             | 1 (0.4)                | <0.0001 | 0.0005 |
| WANG ESOPHAGUS CANCER VS NORMAL UP                   | 118                 | 12 (10.2)             | 12 (10.2)            | 0 (0)                  | <0.0001 | 0.0005 |
| HINATA NFKB TARGETS KERATINOCYTE UP                  | 91                  | 9 (9.9)               | 6 (6.6)              | 3 (3.3)                | <0.0001 | 0.0005 |
| GUTIERREZ CHRONIC LYMPHOCYTIC LEUKEMIA DN            | 56                  | 8 (14.3)              | 6 (10.7)             | 2 (3.6)                | <0.0001 | 0.0005 |
| MORI IMMATURE B LYMPHOCYTE UP                        | 52                  | 7 (13.5)              | 7 (13.5)             | 0 (0)                  | <0.0001 | 0.0005 |
| DIRMEIER LMP1 RESPONSE LATE DN                       | 30                  | 5 (16.7)              | 5 (16.7)             | 0 (0)                  | <0.0001 | 0.0005 |
| NIELSEN SYNOVIAL SARCOMA DN                          | 19                  | 5 (26.3)              | 5 (26.3)             | 0 (0)                  | <0.0001 | 0.0005 |
| PILON KLF1 TARGETS DN                                | 1922                | 63 (3.3)              | 51 (2.7)             | 12 (0.6)               | <0.0001 | 0.0006 |
| PATIL LIVER CANCER                                   | 729                 | 31 (4.3)              | 22 (3)               | 9 (1.2)                | <0.0001 | 0.0006 |
| DUTERTRE ESTRADIOL RESPONSE 24HR DN                  | 502                 | 25 (5)                | 24 (4.8)             | 1 (0.2)                | <0.0001 | 0.0006 |
| BLUM RESPONSE TO SALIRASIB UP                        | 240                 | 15 (6.2)              | 14 (5.8)             | 1 (0.4)                | <0.0001 | 0.0006 |
| WANG CISPLATIN RESPONSE AND XPC UP                   | 189                 | 13 (6.9)              | 9 (4.8)              | 4 (2.1)                | <0.0001 | 0.0006 |
| BROWNE HCMV INFECTION 12HR UP                        | 105                 | 10 (9.5)              | 9 (8.6)              | 1 (1)                  | <0.0001 | 0.0006 |
| OUELLET OVARIAN CANCER INVASIVE VS LMP UP            | 115                 | 10 (8.7)              | 8 (7)                | 2 (1.7)                | <0.0001 | 0.0006 |
| BOYLAN MULTIPLE MYELOMA PCA1 UP                      | 96                  | 9 (9.4)               | 8 (8.3)              | 1 (1)                  | <0.0001 | 0.0006 |
| GAVIN FOXP3 TARGETS CLUSTER T4                       | 93                  | 9 (9.7)               | 9 (9.7)              | 0 (0)                  | <0.0001 | 0.0006 |
| LINDSTEDT DENDRITIC CELL MATURATION A                | 67                  | 8 (11.9)              | 7 (10.4)             | 1 (1.5)                | <0.0001 | 0.0006 |
| CROONQUIST IL6 DEPRIVATION UP                        | 20                  | 5 (25)                | 4 (20)               | 1 (5)                  | <0.0001 | 0.0006 |
| BOCHKIS FOXA2 TARGETS                                | 425                 | 20 (4.7)              | 16 (3.8)             | 4 (0.9)                | <0.0001 | 0.0008 |
| PLASARI TGFB1 TARGETS 10HR DN                        | 233                 | 16 (6.9)              | 14 (6)               | 2 (0.9)                | <0.0001 | 0.0008 |
| TAKEDA TARGETS OF NUP98 HOXA9 FUSION 10D DN          | 135                 | 11 (8.1)              | 7 (5.2)              | 4 (3)                  | <0.0001 | 0.0008 |
| LUI THYROID CANCER CLUSTER 4                         | 13                  | 4 (30.8)              | 4 (30.8)             | 0 (0)                  | <0.0001 | 0.0008 |
| BASAKI YBX1 TARGETS DN                               | 361                 | 20 (5.5)              | 13 (3.6)             | 7 (1.9)                | <0.0001 | 0.0009 |
| TORCHIA TARGETS OF EWSR1 FLI1 FUSION DN              | 306                 | 18 (5.9)              | 16 (5.2)             | 2 (0.7)                | <0.0001 | 0.0009 |
| CHANG CORE SERUM RESPONSE DN                         | 205                 | 14 (6.8)              | 10 (4.9)             | 4 (2)                  | <0.0001 | 0.0009 |
| PETROVA ENDOTHELIUM LYMPHATIC VS BLOOD DN            | 157                 | 12 (7.6)              | 9 (5.7)              | 3 (1.9)                | <0.0001 | 0.0009 |
| TONKS TARGETS OF RUNX1 RUNX1T1 FUSION ERYTHROCYTE UP | 151                 | 12 (7.9)              | 10 (6.6)             | 2 (1.3)                | <0.0001 | 0.0009 |
| DARWICHE SKIN TUMOR PROMOTER UP                      | 139                 | 10 (7.2)              | 8 (5.8)              | 2 (1.4)                | <0.0001 | 0.0009 |
| BROWNE HCMV INFECTION 2HR UP                         | 38                  | 6 (15.8)              | 5 (13.2)             | 1 (2.6)                | <0.0001 | 0.0009 |
| SATO SILENCED BY DEACETYLATION IN PANCREATIC CANCER  | 43                  | 6 (14)                | 2 (4.7)              | 4 (9.3)                | <0.0001 | 0.0009 |



| Category Name                                   | Category<br>Genes # | Any-reg.<br>SDEG #(%) | Up-reg.<br>SDEG #(%) | Down-reg.<br>SDEG #(%) | P       | FDR    |
|-------------------------------------------------|---------------------|-----------------------|----------------------|------------------------|---------|--------|
| EHLERS ANEUPLOIDY DN                            | 12                  | 4 (33.3)              | 4 (33.3)             | 0 (0)                  | <0.0001 | 0.0009 |
| BRUINS UVC RESPONSE LATE                        | 1111                | 39 (3.5)              | 26 (2.3)             | 13 (1.2)               | <0.0001 | 0.001  |
| WAKABAYASHI ADIPOGENESIS PPARG RXRA BOUND 8D    | 899                 | 34 (3.8)              | 20 (2.2)             | 14 (1.6)               | <0.0001 | 0.001  |
| MULLIGHAN MLL SIGNATURE 2 UP                    | 413                 | 20 (4.8)              | 16 (3.9)             | 4 (1)                  | <0.0001 | 0.001  |
| ENK UV RESPONSE EPIDERMIS UP                    | 298                 | 16 (5.4)              | 12 (4)               | 4 (1.3)                | <0.0001 | 0.001  |
| SASAKI ADULT T CELL LEUKEMIA                    | 186                 | 12 (6.5)              | 9 (4.8)              | 3 (1.6)                | <0.0001 | 0.001  |
| SARRIO EPITHELIAL MESENCHYMAL TRANSITION DN     | 149                 | 11 (7.4)              | 9 (6)                | 2 (1.3)                | <0.0001 | 0.001  |
| SCHAEFFER PROSTATE DEVELOPMENT 48HR UP          | 465                 | 22 (4.7)              | 15 (3.2)             | 7 (1.5)                | <0.0001 | 0.0011 |
| ENK UV RESPONSE KERATINOCYTE UP                 | 529                 | 21 (4)                | 19 (3.6)             | 2 (0.4)                | <0.0001 | 0.0011 |
| HSIAO HOUSEKEEPING GENES                        | 374                 | 17 (4.5)              | 16 (4.3)             | 1 (0.3)                | <0.0001 | 0.0011 |
| SMIRNOV RESPONSE TO IR 6HR UP                   | 162                 | 12 (7.4)              | 11 (6.8)             | 1 (0.6)                | <0.0001 | 0.0011 |
| AZARE NEOPLASTIC TRANSFORMATION BY STAT3 DN     | 115                 | 10 (8.7)              | 8 (7)                | 2 (1.7)                | <0.0001 | 0.0011 |
| KOBAYASHI EGFR SIGNALING 24HR UP                | 110                 | 9 (8.2)               | 7 (6.4)              | 2 (1.8)                | <0.0001 | 0.0011 |
| JOHANSSON GLIOMAGENESIS BY PDGFB UP             | 57                  | 7 (12.3)              | 2 (3.5)              | 5 (8.8)                | <0.0001 | 0.0011 |
| MORI LARGE PRE BII LYMPHOCYTE DN                | 56                  | 7 (12.5)              | 6 (10.7)             | 1 (1.8)                | <0.0001 | 0.0011 |
| KUWANO RNA STABILIZED BY NO                     | 7                   | 3 (42.9)              | 2 (28.6)             | 1 (14.3)               | <0.0001 | 0.0011 |
| GRAESSMANN RESPONSE TO MC AND DOXORUBICIN UP    | 615                 | 26 (4.2)              | 17 (2.8)             | 9 (1.5)                | <0.0001 | 0.0012 |
| RUTELLA RESPONSE TO CSF2RB AND IL4 UP           | 319                 | 18 (5.6)              | 16 (5)               | 2 (0.6)                | <0.0001 | 0.0012 |
| KATSANOUE ELAVL1 TARGETS UP                     | 163                 | 11 (6.7)              | 10 (6.1)             | 1 (0.6)                | <0.0001 | 0.0012 |
| HESS TARGETS OF HOXA9 AND MEIS1 DN              | 76                  | 8 (10.5)              | 8 (10.5)             | 0 (0)                  | <0.0001 | 0.0012 |
| YAO TEMPORAL RESPONSE TO PROGESTERONE CLUSTER 9 | 72                  | 7 (9.7)               | 7 (9.7)              | 0 (0)                  | <0.0001 | 0.0012 |
| JAATINEN HEMATOPOIETIC STEM CELL UP             | 294                 | 17 (5.8)              | 9 (3.1)              | 8 (2.7)                | <0.0001 | 0.0013 |
| DARWICHE SQUAMOUS CELL CARCINOMA UP             | 143                 | 10 (7)                | 9 (6.3)              | 1 (0.7)                | <0.0001 | 0.0013 |
| MARTINEZ RESPONSE TO TRABECTEDIN UP             | 66                  | 7 (10.6)              | 7 (10.6)             | 0 (0)                  | <0.0001 | 0.0013 |
| NEWMAN ERCC6 TARGETS UP                         | 26                  | 5 (19.2)              | 3 (11.5)             | 2 (7.7)                | <0.0001 | 0.0013 |
| NOJIMA SFRP2 TARGETS DN                         | 25                  | 5 (20)                | 5 (20)               | 0 (0)                  | <0.0001 | 0.0013 |
| CUI TCF21 TARGETS 2 DN                          | 813                 | 34 (4.2)              | 26 (3.2)             | 8 (1)                  | 0.0001  | 0.0014 |
| DEURIG T CELL PROLYMPHOCYTIC LEUKEMIA DN        | 302                 | 17 (5.6)              | 16 (5.3)             | 1 (0.3)                | 0.0001  | 0.0014 |
| CHYLA CBFA2T3 TARGETS DN                        | 233                 | 14 (6)                | 12 (5.2)             | 2 (0.9)                | 0.0001  | 0.0014 |
| DAZARD RESPONSE TO UV NHEK UP                   | 243                 | 13 (5.3)              | 10 (4.1)             | 3 (1.2)                | 0.0001  | 0.0014 |
| WIERENGA STAT5A TARGETS GROUP2                  | 59                  | 7 (11.9)              | 5 (8.5)              | 2 (3.4)                | 0.0001  | 0.0014 |
| ZHAN MULTIPLE MYELOMA MF UP                     | 44                  | 6 (13.6)              | 3 (6.8)              | 3 (6.8)                | 0.0001  | 0.0014 |
| WORSCHER TUMOR EVASION AND TOLEROGENICITY DN    | 15                  | 4 (26.7)              | 4 (26.7)             | 0 (0)                  | 0.0001  | 0.0014 |
| VANTVEER BREAST CANCER ESR1 DN                  | 232                 | 14 (6)                | 14 (6)               | 0 (0)                  | 0.0001  | 0.0016 |
| SWEET LUNG CANCER KRAS DN                       | 425                 | 20 (4.7)              | 13 (3.1)             | 7 (1.6)                | 0.0001  | 0.0017 |
| LEE AGING NEOCORTEX UP                          | 87                  | 8 (9.2)               | 5 (5.7)              | 3 (3.4)                | 0.0001  | 0.0017 |
| RODRIGUES THYROID CARCINOMA ANAPLASTIC UP       | 707                 | 30 (4.2)              | 27 (3.8)             | 3 (0.4)                | 0.0001  | 0.0018 |
| CHUNG BLISTER CYTOTOXICITY UP                   | 130                 | 10 (7.7)              | 8 (6.2)              | 2 (1.5)                | 0.0001  | 0.0018 |

| Category Name                                    | Category<br>Genes # | Any-reg.<br>SDEG #(%) | Up-reg.<br>SDEG #(%) | Down-reg.<br>SDEG #(%) | P      | FDR    |
|--------------------------------------------------|---------------------|-----------------------|----------------------|------------------------|--------|--------|
| IZADPANAH STEM CELL ADIPOSE VS BONE UP           | 125                 | 10 (8)                | 8 (6.4)              | 2 (1.6)                | 0.0001 | 0.0018 |
| CREIGHTON ENDOCRINE THERAPY RESISTANCE 3         | 696                 | 29 (4.2)              | 26 (3.7)             | 3 (0.4)                | 0.0001 | 0.0019 |
| HUANG GATA2 TARGETS UP                           | 146                 | 10 (6.8)              | 8 (5.5)              | 2 (1.4)                | 0.0001 | 0.0019 |
| HUANG DASATINIB RESISTANCE UP                    | 79                  | 8 (10.1)              | 8 (10.1)             | 0 (0)                  | 0.0001 | 0.0019 |
| LU TUMOR ANGIOGENESIS UP                         | 25                  | 5 (20)                | 3 (12)               | 2 (8)                  | 0.0001 | 0.0019 |
| ACEVEDO LIVER TUMOR VS NORMAL ADJACENT TISSUE UP | 850                 | 30 (3.5)              | 22 (2.6)             | 8 (0.9)                | 0.0002 | 0.002  |
| CREIGHTON ENDOCRINE THERAPY RESISTANCE 2         | 453                 | 21 (4.6)              | 15 (3.3)             | 6 (1.3)                | 0.0002 | 0.002  |
| GRUETZMANN PANCREATIC CANCER DN                  | 190                 | 12 (6.3)              | 9 (4.7)              | 3 (1.6)                | 0.0002 | 0.002  |
| NAKAYAMA SOFT TISSUE TUMORS PCA1 UP              | 69                  | 7 (10.1)              | 7 (10.1)             | 0 (0)                  | 0.0002 | 0.002  |
| GOBERT OLIGODENDROCYTE DIFFERENTIATION DN        | 1051                | 39 (3.7)              | 29 (2.8)             | 10 (1)                 | 0.0002 | 0.0021 |
| CONCANNON APOPTOSIS BY EPOXOMICIN UP             | 227                 | 14 (6.2)              | 12 (5.3)             | 2 (0.9)                | 0.0002 | 0.0021 |
| BOYLAN MULTIPLE MYELOMA PCA3 UP                  | 76                  | 8 (10.5)              | 6 (7.9)              | 2 (2.6)                | 0.0002 | 0.0021 |
| HINATA NFKB TARGETS FIBROBLAST UP                | 83                  | 8 (9.6)               | 5 (6)                | 3 (3.6)                | 0.0002 | 0.0021 |
| ZHAN MULTIPLE MYELOMA CD1 VS CD2 UP              | 64                  | 7 (10.9)              | 6 (9.4)              | 1 (1.6)                | 0.0002 | 0.0021 |
| YAO TEMPORAL RESPONSE TO PROGESTERONE CLUSTER 5  | 29                  | 5 (17.2)              | 5 (17.2)             | 0 (0)                  | 0.0002 | 0.0021 |
| DIAZ CHRONIC MEYLOGENOUS LEUKEMIA DN             | 112                 | 9 (8)                 | 9 (8)                | 0 (0)                  | 0.0002 | 0.0022 |
| WONG ADULT TISSUE STEM MODULE                    | 697                 | 28 (4)                | 21 (3)               | 7 (1)                  | 0.0002 | 0.0023 |
| VERHAAK GLIOBLASTOMA NEURAL                      | 205                 | 13 (6.3)              | 13 (6.3)             | 0 (0)                  | 0.0002 | 0.0023 |
| MARTENS BOUND BY PML RARA FUSION                 | 446                 | 21 (4.7)              | 14 (3.1)             | 7 (1.6)                | 0.0002 | 0.0024 |
| POTTI ETOPOSIDE SENSITIVITY                      | 43                  | 6 (14)                | 3 (7)                | 3 (7)                  | 0.0002 | 0.0024 |
| MACLACHLAN BRCA1 TARGETS DN                      | 18                  | 4 (22.2)              | 3 (16.7)             | 1 (5.6)                | 0.0002 | 0.0024 |
| SPIELMAN LYMPHOBLAST EUROPEAN VS ASIAN UP        | 464                 | 20 (4.3)              | 14 (3)               | 6 (1.3)                | 0.0002 | 0.0025 |
| MAHADEVAN RESPONSE TO MP470 DN                   | 20                  | 4 (20)                | 4 (20)               | 0 (0)                  | 0.0002 | 0.0026 |
| GREGORY SYNTHETIC LETHAL WITH IMATINIB           | 144                 | 10 (6.9)              | 9 (6.2)              | 1 (0.7)                | 0.0002 | 0.0027 |
| WIERENGA STAT5A TARGETS GROUP1                   | 130                 | 10 (7.7)              | 6 (4.6)              | 4 (3.1)                | 0.0002 | 0.0027 |
| LEE CALORIE RESTRICTION NEOCORTEX DN             | 87                  | 8 (9.2)               | 5 (5.7)              | 3 (3.4)                | 0.0002 | 0.0027 |
| IIZUKA LIVER CANCER PROGRESSION LO L1 DN         | 20                  | 4 (20)                | 4 (20)               | 0 (0)                  | 0.0002 | 0.0027 |
| GRAHAM CML DIVIDING VS NORMAL QUIESCENT DN       | 88                  | 8 (9.1)               | 6 (6.8)              | 2 (2.3)                | 0.0002 | 0.0028 |
| BOYLAN MULTIPLE MYELOMA PCA3 DN                  | 65                  | 7 (10.8)              | 6 (9.2)              | 1 (1.5)                | 0.0002 | 0.0028 |
| SHIN B CELL LYMPHOMA CLUSTER 2                   | 30                  | 5 (16.7)              | 3 (10)               | 2 (6.7)                | 0.0002 | 0.0028 |
| HELLER HDAC TARGETS DN                           | 281                 | 15 (5.3)              | 11 (3.9)             | 4 (1.4)                | 0.0002 | 0.0028 |
| WONG MITOCHONDRIA GENE MODULE                    | 209                 | 11 (5.3)              | 10 (4.8)             | 1 (0.5)                | 0.0002 | 0.0028 |
| FAELT B CLL WITH VH3 21 DN                       | 47                  | 6 (12.8)              | 5 (10.6)             | 1 (2.1)                | 0.0002 | 0.0028 |
| MCBRYAN PUBERTAL BREAST 4 5WK UP                 | 264                 | 14 (5.3)              | 6 (2.3)              | 8 (3)                  | 0.0003 | 0.0029 |
| TARTE PLASMA CELL VS PLASMABLAST DN              | 297                 | 15 (5.1)              | 14 (4.7)             | 1 (0.3)                | 0.0003 | 0.003  |
| KOBAYASHI EGFR SIGNALING 24HR DN                 | 260                 | 14 (5.4)              | 11 (4.2)             | 3 (1.2)                | 0.0003 | 0.0032 |
| MONNIER POSTRADIATION TUMOR ESCAPE DN            | 357                 | 17 (4.8)              | 17 (4.8)             | 0 (0)                  | 0.0003 | 0.0032 |
| CHIARADONNA NEOPLASTIC TRANSFORMATION KRAS DN    | 143                 | 10 (7)                | 7 (4.9)              | 3 (2.1)                | 0.0003 | 0.0032 |

| Category Name                                         | Category<br>Genes # | Any-reg.<br>SDEG #(%) | Up-reg.<br>SDEG #(%) | Down-reg.<br>SDEG #(%) | P      | FDR    |
|-------------------------------------------------------|---------------------|-----------------------|----------------------|------------------------|--------|--------|
| PENG LEUCINE DEPRIVATION UP                           | 150                 | 10 (6.7)              | 9 (6)                | 1 (0.7)                | 0.0003 | 0.0032 |
| ZHONG SECRETOME OF LUNG CANCER AND FIBROBLAST         | 129                 | 9 (7)                 | 7 (5.4)              | 2 (1.6)                | 0.0003 | 0.0032 |
| ISHIKAWA STING SIGNALING                              | 8                   | 3 (37.5)              | 3 (37.5)             | 0 (0)                  | 0.0003 | 0.0032 |
| MIKKELSEN ES ICP WITH H3K4ME3                         | 678                 | 26 (3.8)              | 21 (3.1)             | 5 (0.7)                | 0.0003 | 0.0033 |
| YAGI AML WITH T 8 21 TRANSLOCATION                    | 349                 | 17 (4.9)              | 15 (4.3)             | 2 (0.6)                | 0.0003 | 0.0033 |
| DANG REGULATED BY MYC DN                              | 247                 | 14 (5.7)              | 12 (4.9)             | 2 (0.8)                | 0.0003 | 0.0034 |
| LIAO METASTASIS                                       | 505                 | 22 (4.4)              | 17 (3.4)             | 5 (1)                  | 0.0003 | 0.0035 |
| TOOKER GEMCITABINE RESISTANCE UP                      | 77                  | 7 (9.1)               | 7 (9.1)              | 0 (0)                  | 0.0003 | 0.0036 |
| MULLIGHAN MLL SIGNATURE 2 DN                          | 271                 | 15 (5.5)              | 13 (4.8)             | 2 (0.7)                | 0.0003 | 0.0037 |
| MIYAGAWA TARGETS OF EWSR1 ETS FUSIONS UP              | 247                 | 14 (5.7)              | 10 (4)               | 4 (1.6)                | 0.0003 | 0.0037 |
| VANHARANTA UTERINE FIBROID DN                         | 66                  | 7 (10.6)              | 7 (10.6)             | 0 (0)                  | 0.0003 | 0.0037 |
| LEE RECENT THYMIC EMIGRANT                            | 217                 | 13 (6)                | 12 (5.5)             | 1 (0.5)                | 0.0003 | 0.0038 |
| THUM SYSTOLIC HEART FAILURE UP                        | 404                 | 19 (4.7)              | 16 (4)               | 3 (0.7)                | 0.0004 | 0.0038 |
| KLEIN PRIMARY EFFUSION LYMPHOMA DN                    | 54                  | 6 (11.1)              | 6 (11.1)             | 0 (0)                  | 0.0004 | 0.0038 |
| CROONQUIST NRAS SIGNALING UP                          | 35                  | 5 (14.3)              | 3 (8.6)              | 2 (5.7)                | 0.0004 | 0.0038 |
| KEEN RESPONSE TO ROSIGLITAZONE DN                     | 106                 | 8 (7.5)               | 6 (5.7)              | 2 (1.9)                | 0.0004 | 0.0039 |
| GHANDHI BYSTANDER IRRADIATION UP                      | 78                  | 7 (9)                 | 5 (6.4)              | 2 (2.6)                | 0.0004 | 0.0039 |
| CHIANG LIVER CANCER SUBCLASS INTERFERON UP            | 24                  | 4 (16.7)              | 4 (16.7)             | 0 (0)                  | 0.0004 | 0.0039 |
| SCHLOSSER SERUM RESPONSE DN                           | 680                 | 27 (4)                | 23 (3.4)             | 4 (0.6)                | 0.0004 | 0.004  |
| JI RESPONSE TO FSH UP                                 | 85                  | 7 (8.2)               | 6 (7.1)              | 1 (1.2)                | 0.0004 | 0.004  |
| GESERICK TERT TARGETS DN                              | 21                  | 4 (19)                | 4 (19)               | 0 (0)                  | 0.0004 | 0.004  |
| MIKKELSEN MEF LCP WITH H3K4ME3                        | 121                 | 9 (7.4)               | 8 (6.6)              | 1 (0.8)                | 0.0004 | 0.0041 |
| GAUSSMANN MLL AF4 FUSION TARGETS A DN                 | 90                  | 8 (8.9)               | 6 (6.7)              | 2 (2.2)                | 0.0004 | 0.0041 |
| BOYLAN MULTIPLE MYELOMA C CLUSTER DN                  | 41                  | 5 (12.2)              | 2 (4.9)              | 3 (7.3)                | 0.0004 | 0.0041 |
| GARGALOVIC RESPONSE TO OXIDIZED PHOSPHOLIPIDS GREY DN | 73                  | 7 (9.6)               | 6 (8.2)              | 1 (1.4)                | 0.0004 | 0.0042 |
| ONO AML1 TARGETS UP                                   | 23                  | 4 (17.4)              | 4 (17.4)             | 0 (0)                  | 0.0004 | 0.0044 |
| POTTI PACLITAXEL SENSITIVITY                          | 36                  | 5 (13.9)              | 4 (11.1)             | 1 (2.8)                | 0.0004 | 0.0045 |
| ENK UV RESPONSE KERATINOCYTE DN                       | 481                 | 21 (4.4)              | 17 (3.5)             | 4 (0.8)                | 0.0005 | 0.0047 |
| HELLER HDAC TARGETS UP                                | 318                 | 15 (4.7)              | 9 (2.8)              | 6 (1.9)                | 0.0005 | 0.0048 |
| WIERENGA STAT5A TARGETS DN                            | 219                 | 12 (5.5)              | 8 (3.7)              | 4 (1.8)                | 0.0005 | 0.0048 |
| ELVIDGE HYPOXIA UP                                    | 166                 | 11 (6.6)              | 8 (4.8)              | 3 (1.8)                | 0.0005 | 0.005  |
| BOYLAN MULTIPLE MYELOMA D DN                          | 71                  | 7 (9.9)               | 5 (7)                | 2 (2.8)                | 0.0005 | 0.005  |
| HOFMANN CELL LYMPHOMA DN                              | 37                  | 5 (13.5)              | 5 (13.5)             | 0 (0)                  | 0.0005 | 0.005  |
| YAGI AML WITH T 9 11 TRANSLOCATION                    | 138                 | 9 (6.5)               | 7 (5.1)              | 2 (1.4)                | 0.0005 | 0.0052 |
| LU IL4 SIGNALING                                      | 94                  | 8 (8.5)               | 8 (8.5)              | 0 (0)                  | 0.0005 | 0.0052 |
| JACKSON DNMT1 TARGETS UP                              | 76                  | 7 (9.2)               | 7 (9.2)              | 0 (0)                  | 0.0005 | 0.0052 |
| UZONYI RESPONSE TO LEUKOTRIENE AND THROMBIN           | 37                  | 5 (13.5)              | 2 (5.4)              | 3 (8.1)                | 0.0005 | 0.0052 |
| TERAMOTO OPN TARGETS CLUSTER 7                        | 19                  | 4 (21.1)              | 3 (15.8)             | 1 (5.3)                | 0.0005 | 0.0052 |

| Category Name                                       | Category<br>Genes # | Any-reg.<br>SDEG #(%) | Up-reg.<br>SDEG #(%) | Down-reg.<br>SDEG #(%) | P      | FDR    |
|-----------------------------------------------------|---------------------|-----------------------|----------------------|------------------------|--------|--------|
| SENESE HDAC1 AND HDAC2 TARGETS UP                   | 231                 | 13 (5.6)              | 9 (3.9)              | 4 (1.7)                | 0.0005 | 0.0052 |
| MATTIOLI MULTIPLE MYELOMA WITH 14Q32 TRANSLOCATIONS | 33                  | 5 (15.2)              | 3 (9.1)              | 2 (6.1)                | 0.0005 | 0.0052 |
| MASSARWEH TAMOXIFEN RESISTANCE UP                   | 561                 | 24 (4.3)              | 21 (3.7)             | 3 (0.5)                | 0.0005 | 0.0054 |
| GREENBAUM E2A TARGETS DN                            | 21                  | 4 (19)                | 4 (19)               | 0 (0)                  | 0.0005 | 0.0054 |
| BIDUS METASTASIS DN                                 | 153                 | 10 (6.5)              | 8 (5.2)              | 2 (1.3)                | 0.0006 | 0.0055 |
| TARTE PLASMA CELL VS B LYMPHOCYTE DN                | 36                  | 5 (13.9)              | 5 (13.9)             | 0 (0)                  | 0.0006 | 0.0056 |
| BROWN MYELOID CELL DEVELOPMENT UP                   | 159                 | 10 (6.3)              | 9 (5.7)              | 1 (0.6)                | 0.0006 | 0.0056 |
| RASHI RESPONSE TO IONIZING RADIATION 2              | 126                 | 9 (7.1)               | 8 (6.3)              | 1 (0.8)                | 0.0006 | 0.0056 |
| DASU IL6 SIGNALING UP                               | 59                  | 6 (10.2)              | 5 (8.5)              | 1 (1.7)                | 0.0006 | 0.0056 |
| HELLER HDAC TARGETS SILENCED BY METHYLATION DN      | 269                 | 14 (5.2)              | 11 (4.1)             | 3 (1.1)                | 0.0006 | 0.0057 |
| MARTORIATI MDM4 TARGETS FETAL LIVER UP              | 224                 | 12 (5.4)              | 9 (4)                | 3 (1.3)                | 0.0006 | 0.0059 |
| FRASOR RESPONSE TO ESTRADIOL DN                     | 79                  | 7 (8.9)               | 5 (6.3)              | 2 (2.5)                | 0.0006 | 0.006  |
| SMIRNOV CIRCULATING ENDOTHELIOCYTES IN CANCER UP    | 152                 | 10 (6.6)              | 5 (3.3)              | 5 (3.3)                | 0.0006 | 0.006  |
| FLECHNER BIOPSY KIDNEY TRANSPLANT OK VS DONOR UP    | 529                 | 22 (4.2)              | 20 (3.8)             | 2 (0.4)                | 0.0006 | 0.0061 |
| DARWICHE PAPILLOMA RISK HIGH UP                     | 145                 | 9 (6.2)               | 8 (5.5)              | 1 (0.7)                | 0.0007 | 0.0064 |
| ALCALA APOPTOSIS                                    | 84                  | 7 (8.3)               | 6 (7.1)              | 1 (1.2)                | 0.0007 | 0.0064 |
| BURTON ADIPOGENESIS PEAK AT 0HR                     | 61                  | 6 (9.8)               | 5 (8.2)              | 1 (1.6)                | 0.0007 | 0.0064 |
| PLASARI TGFB1 SIGNALING VIA NFIC 10HR UP            | 54                  | 6 (11.1)              | 5 (9.3)              | 1 (1.9)                | 0.0007 | 0.0064 |
| ZHAN V2 LATE DIFFERENTIATION GENES                  | 45                  | 5 (11.1)              | 3 (6.7)              | 2 (4.4)                | 0.0007 | 0.0068 |
| MOOTHA MITOCHONDRIA                                 | 424                 | 17 (4)                | 11 (2.6)             | 6 (1.4)                | 0.0007 | 0.0068 |
| HAMAI APOPTOSIS VIA TRAIL DN                        | 172                 | 10 (5.8)              | 9 (5.2)              | 1 (0.6)                | 0.0007 | 0.0068 |
| HUMMERICH SKIN CANCER PROGRESSION UP                | 87                  | 7 (8)                 | 6 (6.9)              | 1 (1.1)                | 0.0007 | 0.0068 |
| SPIELMAN LYMPHOBLAST EUROPEAN VS ASIAN DN           | 570                 | 23 (4)                | 22 (3.9)             | 1 (0.2)                | 0.0007 | 0.0069 |
| GAVIN FOXP3 TARGETS CLUSTER P6                      | 85                  | 7 (8.2)               | 7 (8.2)              | 0 (0)                  | 0.0007 | 0.0069 |
| VALK AML CLUSTER 11                                 | 36                  | 5 (13.9)              | 5 (13.9)             | 0 (0)                  | 0.0007 | 0.0069 |
| WINNEPENNINGCKX MELANOMA METASTASIS DN              | 43                  | 5 (11.6)              | 3 (7)                | 2 (4.7)                | 0.0007 | 0.0069 |
| DAZARD UV RESPONSE CLUSTER G5                       | 16                  | 3 (18.8)              | 2 (12.5)             | 1 (6.2)                | 0.0008 | 0.0071 |
| MCBRYAN PUBERTAL TGFB1 TARGETS DN                   | 65                  | 6 (9.2)               | 3 (4.6)              | 3 (4.6)                | 0.0008 | 0.0072 |
| PASQUALUCCI LYMPHOMA BY GC STAGE DN                 | 157                 | 10 (6.4)              | 10 (6.4)             | 0 (0)                  | 0.0008 | 0.0072 |
| MCBRYAN PUBERTAL BREAST 3 4WK UP                    | 212                 | 12 (5.7)              | 5 (2.4)              | 7 (3.3)                | 0.0008 | 0.0073 |
| HAHTOLA MYCOSIS FUNGOIDES CD4 UP                    | 61                  | 6 (9.8)               | 5 (8.2)              | 1 (1.6)                | 0.0008 | 0.0074 |
| PURBEY TARGETS OF CTBP1 NOT SATB1 DN                | 412                 | 18 (4.4)              | 15 (3.6)             | 3 (0.7)                | 0.0008 | 0.0075 |
| WEST ADRENOCORTICAL CARCINOMA VS ADENOMA DN         | 24                  | 4 (16.7)              | 4 (16.7)             | 0 (0)                  | 0.0008 | 0.0075 |
| RHODES UNDIFFERENTIATED CANCER                      | 68                  | 6 (8.8)               | 5 (7.4)              | 1 (1.5)                | 0.0008 | 0.0076 |
| MATHEW FANCONI ANEMIA GENES                         | 10                  | 3 (30)                | 3 (30)               | 0 (0)                  | 0.0008 | 0.0076 |
| ELVIDGE HYPOXIA BY DMOG UP                          | 126                 | 9 (7.1)               | 6 (4.8)              | 3 (2.4)                | 0.0008 | 0.0076 |
| HASEGAWA TUMORIGENESIS BY RET C634R                 | 11                  | 3 (27.3)              | 3 (27.3)             | 0 (0)                  | 0.0008 | 0.0076 |
| ROSS ACUTE MYELOID LEUKEMIA CBF                     | 81                  | 7 (8.6)               | 7 (8.6)              | 0 (0)                  | 0.0009 | 0.0077 |

| Category Name                             | Category | Any-reg.   | Up-reg.    | Down-reg.  | P      | FDR    |
|-------------------------------------------|----------|------------|------------|------------|--------|--------|
|                                           | Genes #  | SDEG #(% ) | SDEG #(% ) | SDEG #(% ) |        |        |
| SEMBA FHIT TARGETS UP                     | 11       | 3 (27.3)   | 3 (27.3)   | 0 (0)      | 0.0009 | 0.0079 |
| NAKAMURA ADIPOGENESIS LATE UP             | 103      | 8 (7.8)    | 6 (5.8)    | 2 (1.9)    | 0.0009 | 0.0081 |
| GAJATE RESPONSE TO TRABECTEDIN UP         | 68       | 6 (8.8)    | 6 (8.8)    | 0 (0)      | 0.0009 | 0.0083 |
| ZHONG RESPONSE TO AZACITIDINE AND TSA UP  | 180      | 10 (5.6)   | 7 (3.9)    | 3 (1.7)    | 0.0009 | 0.0084 |
| TENEDINI MEGAKARYOCYTE MARKERS            | 64       | 6 (9.4)    | 3 (4.7)    | 3 (4.7)    | 0.0009 | 0.0084 |
| GENTILE UV LOW DOSE UP                    | 27       | 4 (14.8)   | 3 (11.1)   | 1 (3.7)    | 0.0009 | 0.0084 |
| BHAT ESR1 TARGETS VIA AKT1 UP             | 283      | 14 (4.9)   | 8 (2.8)    | 6 (2.1)    | 0.001  | 0.0084 |
| GAL LEUKEMIC STEM CELL DN                 | 244      | 12 (4.9)   | 10 (4.1)   | 2 (0.8)    | 0.001  | 0.0087 |
| MARSON BOUND BY FOXP3 UNSTIMULATED        | 1207     | 38 (3.1)   | 30 (2.5)   | 8 (0.7)    | 0.001  | 0.0088 |
| LU AGING BRAIN UP                         | 249      | 13 (5.2)   | 12 (4.8)   | 1 (0.4)    | 0.001  | 0.0088 |
| DURAND STROMA MAX UP                      | 270      | 14 (5.2)   | 10 (3.7)   | 4 (1.5)    | 0.001  | 0.009  |
| MARZEC IL2 SIGNALING UP                   | 111      | 8 (7.2)    | 4 (3.6)    | 4 (3.6)    | 0.001  | 0.009  |
| WINTER HYPOXIA METAGENE                   | 226      | 12 (5.3)   | 5 (2.2)    | 7 (3.1)    | 0.0011 | 0.0092 |
| BRUINS UVC RESPONSE EARLY LATE            | 313      | 15 (4.8)   | 12 (3.8)   | 3 (1)      | 0.0011 | 0.0092 |
| HUTTMANN B CLL POOR SURVIVAL UP           | 258      | 13 (5)     | 10 (3.9)   | 3 (1.2)    | 0.0011 | 0.0092 |
| DIRMEIER LMP1 RESPONSE EARLY              | 67       | 6 (9)      | 6 (9)      | 0 (0)      | 0.0011 | 0.0092 |
| HOLLEMAN PREDNISOLONE RESISTANCE B ALL DN | 12       | 3 (25)     | 3 (25)     | 0 (0)      | 0.0011 | 0.0092 |
| GAVIN FOXP3 TARGETS CLUSTER P3            | 155      | 10 (6.5)   | 6 (3.9)    | 4 (2.6)    | 0.0011 | 0.0093 |
| SMIRNOV RESPONSE TO IR 6HR DN             | 113      | 8 (7.1)    | 7 (6.2)    | 1 (0.9)    | 0.0011 | 0.0095 |
| WANG HCP PROSTATE CANCER                  | 112      | 8 (7.1)    | 8 (7.1)    | 0 (0)      | 0.0011 | 0.0096 |
| BOYALT LIVER CANCER SUBCLASS G5 DN        | 27       | 4 (14.8)   | 4 (14.8)   | 0 (0)      | 0.0012 | 0.0098 |
| WANG SMARCE1 TARGETS UP                   | 265      | 14 (5.3)   | 11 (4.2)   | 3 (1.1)    | 0.0012 | 0.0099 |
| IIZUKA LIVER CANCER EARLY RECURRENCE      | 11       | 3 (27.3)   | 2 (18.2)   | 1 (9.1)    | 0.0012 | 0.0099 |

**Table A93:** Significantly enriched MSigDB Chemical/Genetic Perturbation Sets (RNA-Seq, Neutrophils, Day 1). Results sorted by FDR and #SDEG genes.

| Category Name            | Category | Any-reg.   | Up-reg.    | Down-reg.  | P       | FDR    |
|--------------------------|----------|------------|------------|------------|---------|--------|
|                          | Genes #  | SDEG #(% ) | SDEG #(% ) | SDEG #(% ) |         |        |
| Influenza A              | 149      | 8 (5.4)    | 8 (5.4)    | 0 (0)      | <0.0001 | 0.0029 |
| Measles                  | 115      | 6 (5.2)    | 6 (5.2)    | 0 (0)      | <0.0001 | 0.0048 |
| Herpes simplex infection | 154      | 6 (3.9)    | 6 (3.9)    | 0 (0)      | <0.0001 | 0.0048 |

**Table A94:** Significantly enriched KEGG Pathways (RNA-Seq, Neutrophils, Day 3). Results sorted by FDR and #SDEG genes.

| Category Name   | Category | Any-reg.   | Up-reg.    | Down-reg.  | P       | FDR    |
|-----------------|----------|------------|------------|------------|---------|--------|
|                 | Genes #  | SDEG #(% ) | SDEG #(% ) | SDEG #(% ) |         |        |
| IMMUNE RESPONSE | 231      | 8 (3.5)    | 8 (3.5)    | 0 (0)      | <0.0001 | 0.0082 |

| Category Name | Category | Any-reg.   | Up-reg.    | Down-reg.  | P | FDR |
|---------------|----------|------------|------------|------------|---|-----|
|               | Genes #  | SDEG #(% ) | SDEG #(% ) | SDEG #(% ) |   |     |

**Table A95:** Significantly enriched MSigDB GO Biological Processes (RNA-Seq, Neutrophils, Day 3). Results sorted by FDR and #SDEG genes.

| Category Name                                         | Category | Any-reg.   | Up-reg.    | Down-reg.  | P       | FDR    |
|-------------------------------------------------------|----------|------------|------------|------------|---------|--------|
|                                                       | Genes #  | SDEG #(% ) | SDEG #(% ) | SDEG #(% ) |         |        |
| NUYTEN EZH2 TARGETS UP                                | 1002     | 48 (4.8)   | 47 (4.7)   | 1 (0.1)    | <0.0001 | 0.0004 |
| FULCHER INFLAMMATORY RESPONSE LECTIN VS LPS DN        | 462      | 38 (8.2)   | 38 (8.2)   | 0 (0)      | <0.0001 | 0.0004 |
| NUYTEN NIPP1 TARGETS UP                               | 748      | 36 (4.8)   | 36 (4.8)   | 0 (0)      | <0.0001 | 0.0004 |
| HECKER IFNB1 TARGETS                                  | 92       | 35 (38)    | 35 (38)    | 0 (0)      | <0.0001 | 0.0004 |
| TAKEDA TARGETS OF NUP98 HOXA9 FUSION 3D UP            | 178      | 34 (19.1)  | 34 (19.1)  | 0 (0)      | <0.0001 | 0.0004 |
| BOSCO INTERFERON INDUCED ANTIVIRAL MODULE             | 76       | 33 (43.4)  | 32 (42.1)  | 1 (1.3)    | <0.0001 | 0.0004 |
| GRAESSMANN APOPTOSIS BY SERUM DEPRIVATION UP          | 541      | 28 (5.2)   | 28 (5.2)   | 0 (0)      | <0.0001 | 0.0004 |
| GRAESSMANN APOPTOSIS BY DOXORUBICIN UP                | 1132     | 26 (2.3)   | 25 (2.2)   | 1 (0.1)    | <0.0001 | 0.0004 |
| TAKEDA TARGETS OF NUP98 HOXA9 FUSION 10D UP           | 186      | 25 (13.4)  | 25 (13.4)  | 0 (0)      | <0.0001 | 0.0004 |
| TAKEDA TARGETS OF NUP98 HOXA9 FUSION 8D UP            | 155      | 24 (15.5)  | 24 (15.5)  | 0 (0)      | <0.0001 | 0.0004 |
| BROWNE INTERFERON RESPONSIVE GENES                    | 68       | 23 (33.8)  | 23 (33.8)  | 0 (0)      | <0.0001 | 0.0004 |
| DAUER STAT3 TARGETS DN                                | 51       | 23 (45.1)  | 23 (45.1)  | 0 (0)      | <0.0001 | 0.0004 |
| DODD NASOPHARYNGEAL CARCINOMA DN                      | 1330     | 22 (1.7)   | 21 (1.6)   | 1 (0.1)    | <0.0001 | 0.0004 |
| GRAESSMANN RESPONSE TO MC AND SERUM DEPRIVATION UP    | 203      | 22 (10.8)  | 22 (10.8)  | 0 (0)      | <0.0001 | 0.0004 |
| MOSERLE IFNA RESPONSE                                 | 31       | 22 (71)    | 22 (71)    | 0 (0)      | <0.0001 | 0.0004 |
| SANA RESPONSE TO IFNG UP                              | 74       | 22 (29.7)  | 22 (29.7)  | 0 (0)      | <0.0001 | 0.0004 |
| DEBIASI APOPTOSIS BY REOVIRUS INFECTION UP            | 317      | 21 (6.6)   | 21 (6.6)   | 0 (0)      | <0.0001 | 0.0004 |
| DER IFN BETA RESPONSE UP                              | 101      | 21 (20.8)  | 20 (19.8)  | 1 (1)      | <0.0001 | 0.0004 |
| GOZGIT ESR1 TARGETS DN                                | 741      | 21 (2.8)   | 20 (2.7)   | 1 (0.1)    | <0.0001 | 0.0004 |
| WALLACE PROSTATE CANCER RACE UP                       | 275      | 21 (7.6)   | 21 (7.6)   | 0 (0)      | <0.0001 | 0.0004 |
| YANG BCL3 TARGETS UP                                  | 351      | 21 (6)     | 21 (6)     | 0 (0)      | <0.0001 | 0.0004 |
| CHEN METABOLIC SYNDROM NETWORK                        | 1172     | 20 (1.7)   | 20 (1.7)   | 0 (0)      | <0.0001 | 0.0004 |
| COLINA TARGETS OF 4EBP1 AND 4EBP2                     | 339      | 20 (5.9)   | 20 (5.9)   | 0 (0)      | <0.0001 | 0.0004 |
| TAKEDA TARGETS OF NUP98 HOXA9 FUSION 16D UP           | 169      | 19 (11.2)  | 19 (11.2)  | 0 (0)      | <0.0001 | 0.0004 |
| JISON SICKLE CELL DISEASE UP                          | 174      | 18 (10.3)  | 18 (10.3)  | 0 (0)      | <0.0001 | 0.0004 |
| DER IFN ALPHA RESPONSE UP                             | 74       | 17 (23)    | 17 (23)    | 0 (0)      | <0.0001 | 0.0004 |
| FEVR CTNNB1 TARGETS UP                                | 672      | 16 (2.4)   | 16 (2.4)   | 0 (0)      | <0.0001 | 0.0004 |
| HELLER SILENCED BY METHYLATION UP                     | 273      | 16 (5.9)   | 16 (5.9)   | 0 (0)      | <0.0001 | 0.0004 |
| ALTEMEIER RESPONSE TO LPS WITH MECHANICAL VENTILATION | 126      | 15 (11.9)  | 15 (11.9)  | 0 (0)      | <0.0001 | 0.0004 |
| BAELDE DIABETIC NEPHROPATHY DN                        | 425      | 15 (3.5)   | 14 (3.3)   | 1 (0.2)    | <0.0001 | 0.0004 |
| BENNETT SYSTEMIC LUPUS ERYTHEMATOSUS                  | 32       | 15 (46.9)  | 15 (46.9)  | 0 (0)      | <0.0001 | 0.0004 |
| FARMER BREAST CANCER CLUSTER 1                        | 39       | 15 (38.5)  | 15 (38.5)  | 0 (0)      | <0.0001 | 0.0004 |
| MARKEY RB1 ACUTE LOF UP                               | 214      | 15 (7)     | 15 (7)     | 0 (0)      | <0.0001 | 0.0004 |

| Category Name                                     | Category<br>Genes # | Any-reg.<br>SDEG #(%) | Up-reg.<br>SDEG #(%) | Down-reg.<br>SDEG #(%) | P       | FDR    |
|---------------------------------------------------|---------------------|-----------------------|----------------------|------------------------|---------|--------|
| SANA TNF SIGNALING UP                             | 81                  | 15 (18.5)             | 15 (18.5)            | 0 (0)                  | <0.0001 | 0.0004 |
| SEITZ NEOPLASTIC TRANSFORMATION BY 8P DELETION UP | 69                  | 15 (21.7)             | 15 (21.7)            | 0 (0)                  | <0.0001 | 0.0004 |
| DOUGLAS BMI1 TARGETS DN                           | 308                 | 14 (4.5)              | 14 (4.5)             | 0 (0)                  | <0.0001 | 0.0004 |
| EINAV INTERFERON SIGNATURE IN CANCER              | 27                  | 14 (51.9)             | 14 (51.9)            | 0 (0)                  | <0.0001 | 0.0004 |
| FOSTER TOLERANT MACROPHAGE DN                     | 405                 | 14 (3.5)              | 14 (3.5)             | 0 (0)                  | <0.0001 | 0.0004 |
| RADAEVA RESPONSE TO IFNA1 UP                      | 52                  | 14 (26.9)             | 14 (26.9)            | 0 (0)                  | <0.0001 | 0.0004 |
| SENGUPTA NASOPHARYNGEAL CARCINOMA WITH LMP1 UP    | 387                 | 14 (3.6)              | 14 (3.6)             | 0 (0)                  | <0.0001 | 0.0004 |
| ZHOU INFLAMMATORY RESPONSE LPS UP                 | 401                 | 14 (3.5)              | 14 (3.5)             | 0 (0)                  | <0.0001 | 0.0004 |
| CHICAS RB1 TARGETS CONFLUENT                      | 550                 | 13 (2.4)              | 13 (2.4)             | 0 (0)                  | <0.0001 | 0.0004 |
| HORIUCHI WTAP TARGETS UP                          | 295                 | 12 (4.1)              | 12 (4.1)             | 0 (0)                  | <0.0001 | 0.0004 |
| KUMAR TARGETS OF MLL AF9 FUSION                   | 389                 | 12 (3.1)              | 11 (2.8)             | 1 (0.3)                | <0.0001 | 0.0004 |
| RODWELL AGING KIDNEY UP                           | 465                 | 12 (2.6)              | 12 (2.6)             | 0 (0)                  | <0.0001 | 0.0004 |
| STAMBOLSKY TARGETS OF MUTATED TP53 DN             | 51                  | 12 (23.5)             | 12 (23.5)            | 0 (0)                  | <0.0001 | 0.0004 |
| TONKS TARGETS OF RUNX1 RUNX1T1 FUSION MONOCYTE UP | 201                 | 12 (6)                | 12 (6)               | 0 (0)                  | <0.0001 | 0.0004 |
| ZHU CMV ALL UP                                    | 121                 | 11 (9.1)              | 11 (9.1)             | 0 (0)                  | <0.0001 | 0.0004 |
| BERTUCCI MEDULLARY VS DUCTAL BREAST CANCER UP     | 200                 | 10 (5)                | 9 (4.5)              | 1 (0.5)                | <0.0001 | 0.0004 |
| KRASNOSELSKAYA ILF3 TARGETS UP                    | 37                  | 10 (27)               | 10 (27)              | 0 (0)                  | <0.0001 | 0.0004 |
| LIANG SILENCED BY METHYLATION 2                   | 55                  | 10 (18.2)             | 10 (18.2)            | 0 (0)                  | <0.0001 | 0.0004 |
| RIGGINS TAMOXIFEN RESISTANCE DN                   | 215                 | 10 (4.7)              | 10 (4.7)             | 0 (0)                  | <0.0001 | 0.0004 |
| RUTELLA RESPONSE TO HGF VS CSF2RB AND IL4 UP      | 391                 | 10 (2.6)              | 10 (2.6)             | 0 (0)                  | <0.0001 | 0.0004 |
| ZHANG INTERFERON RESPONSE                         | 23                  | 10 (43.5)             | 10 (43.5)            | 0 (0)                  | <0.0001 | 0.0004 |
| ZHANG RESPONSE TO IKK INHIBITOR AND TNF UP        | 221                 | 10 (4.5)              | 10 (4.5)             | 0 (0)                  | <0.0001 | 0.0004 |
| ZHU CMV 24 HR UP                                  | 93                  | 10 (10.8)             | 10 (10.8)            | 0 (0)                  | <0.0001 | 0.0004 |
| BOWIE RESPONSE TO TAMOXIFEN                       | 18                  | 9 (50)                | 9 (50)               | 0 (0)                  | <0.0001 | 0.0004 |
| ICHIBA GRAFT VERSUS HOST DISEASE D7 UP            | 105                 | 9 (8.6)               | 9 (8.6)              | 0 (0)                  | <0.0001 | 0.0004 |
| JOHNSTONE PARVB TARGETS 2 UP                      | 136                 | 9 (6.6)               | 9 (6.6)              | 0 (0)                  | <0.0001 | 0.0004 |
| KRIEG KDM3A TARGETS NOT HYPOXIA                   | 189                 | 9 (4.8)               | 8 (4.2)              | 1 (0.5)                | <0.0001 | 0.0004 |
| ROETH TERT TARGETS UP                             | 14                  | 9 (64.3)              | 9 (64.3)             | 0 (0)                  | <0.0001 | 0.0004 |
| VERHAAK AML WITH NPM1 MUTATED DN                  | 238                 | 9 (3.8)               | 8 (3.4)              | 1 (0.4)                | <0.0001 | 0.0004 |
| XU AKT1 TARGETS 6HR                               | 27                  | 9 (33.3)              | 9 (33.3)             | 0 (0)                  | <0.0001 | 0.0004 |
| ZHAN MULTIPLE MYELOMA LB DN                       | 39                  | 9 (23.1)              | 9 (23.1)             | 0 (0)                  | <0.0001 | 0.0004 |
| BOSCO TH1 CYTOTOXIC MODULE                        | 114                 | 8 (7)                 | 8 (7)                | 0 (0)                  | <0.0001 | 0.0004 |
| BOWIE RESPONSE TO EXTRACELLULAR MATRIX            | 17                  | 8 (47.1)              | 8 (47.1)             | 0 (0)                  | <0.0001 | 0.0004 |
| CHANG IMMORTALIZED BY HPV31 DN                    | 63                  | 8 (12.7)              | 8 (12.7)             | 0 (0)                  | <0.0001 | 0.0004 |
| DER IFN GAMMA RESPONSE UP                         | 72                  | 8 (11.1)              | 8 (11.1)             | 0 (0)                  | <0.0001 | 0.0004 |
| GRANDVAUX IRF3 TARGETS UP                         | 15                  | 8 (53.3)              | 8 (53.3)             | 0 (0)                  | <0.0001 | 0.0004 |
| PLASARI TGFB1 TARGETS 10HR DN                     | 233                 | 8 (3.4)               | 8 (3.4)              | 0 (0)                  | <0.0001 | 0.0004 |
| UROSEVIC RESPONSE TO IMIQUIMOD                    | 23                  | 8 (34.8)              | 8 (34.8)             | 0 (0)                  | <0.0001 | 0.0004 |

| Category Name                                         | Category | Any-reg.  | Up-reg.   | Down-reg. | P       | FDR    |
|-------------------------------------------------------|----------|-----------|-----------|-----------|---------|--------|
|                                                       | Genes #  | SDEG #(%) | SDEG #(%) | SDEG #(%) |         |        |
| ZHU CMV 8 HR UP                                       | 48       | 8 (16.7)  | 8 (16.7)  | 0 (0)     | <0.0001 | 0.0004 |
| BECKER TAMOXIFEN RESISTANCE UP                        | 49       | 7 (14.3)  | 7 (14.3)  | 0 (0)     | <0.0001 | 0.0004 |
| BROWNE HCMV INFECTION 4HR UP                          | 53       | 7 (13.2)  | 7 (13.2)  | 0 (0)     | <0.0001 | 0.0004 |
| WIELAND UP BY HBV INFECTION                           | 100      | 7 (7)     | 7 (7)     | 0 (0)     | <0.0001 | 0.0004 |
| BROWNE HCMV INFECTION 6HR UP                          | 69       | 6 (8.7)   | 6 (8.7)   | 0 (0)     | <0.0001 | 0.0004 |
| CASTELLANO NRAS TARGETS UP                            | 68       | 6 (8.8)   | 6 (8.8)   | 0 (0)     | <0.0001 | 0.0004 |
| XU HGF TARGETS INDUCED BY AKT1 6HR                    | 18       | 6 (33.3)  | 6 (33.3)  | 0 (0)     | <0.0001 | 0.0004 |
| HAN JNK SINGALING UP                                  | 34       | 5 (14.7)  | 5 (14.7)  | 0 (0)     | <0.0001 | 0.0004 |
| JECHLINGER EPITHELIAL TO MESENCHYMAL TRANSITION UP    | 71       | 5 (7)     | 5 (7)     | 0 (0)     | <0.0001 | 0.0004 |
| LEE LIVER CANCER E2F1 UP                              | 62       | 5 (8.1)   | 5 (8.1)   | 0 (0)     | <0.0001 | 0.0004 |
| MAHADEVAN RESPONSE TO MP470 UP                        | 19       | 5 (26.3)  | 5 (26.3)  | 0 (0)     | <0.0001 | 0.0004 |
| TSAI RESPONSE TO RADIATION THERAPY                    | 32       | 5 (15.6)  | 5 (15.6)  | 0 (0)     | <0.0001 | 0.0004 |
| WUNDER INFLAMMATORY RESPONSE AND CHOLESTEROL UP       | 61       | 5 (8.2)   | 5 (8.2)   | 0 (0)     | <0.0001 | 0.0004 |
| GRANDVAUX IFN RESPONSE NOT VIA IRF3                   | 14       | 4 (28.6)  | 4 (28.6)  | 0 (0)     | <0.0001 | 0.0004 |
| TSAI DNAJB4 TARGETS UP                                | 13       | 4 (30.8)  | 4 (30.8)  | 0 (0)     | <0.0001 | 0.0004 |
| ONKEN UVEAL MELANOMA UP                               | 763      | 14 (1.8)  | 14 (1.8)  | 0 (0)     | <0.0001 | 0.0007 |
| JOHNSTONE PARVB TARGETS 3 UP                          | 425      | 10 (2.4)  | 10 (2.4)  | 0 (0)     | <0.0001 | 0.0007 |
| BOQUEST STEM CELL DN                                  | 213      | 8 (3.8)   | 7 (3.3)   | 1 (0.5)   | <0.0001 | 0.0007 |
| MIKKELSEN MCV6 LCP WITH H3K4ME3                       | 153      | 7 (4.6)   | 7 (4.6)   | 0 (0)     | <0.0001 | 0.0007 |
| MISSIAGLIA REGULATED BY METHYLATION UP                | 120      | 7 (5.8)   | 7 (5.8)   | 0 (0)     | <0.0001 | 0.0007 |
| WANG ESOPHAGUS CANCER VS NORMAL UP                    | 118      | 6 (5.1)   | 6 (5.1)   | 0 (0)     | <0.0001 | 0.0007 |
| GARGALOVIC RESPONSE TO OXIDIZED PHOSPHOLIPIDS GREY DN | 73       | 5 (6.8)   | 5 (6.8)   | 0 (0)     | <0.0001 | 0.0007 |
| LEE LIVER CANCER MYC E2F1 UP                          | 56       | 5 (8.9)   | 5 (8.9)   | 0 (0)     | <0.0001 | 0.0007 |
| KIM LRRC3B TARGETS                                    | 30       | 4 (13.3)  | 4 (13.3)  | 0 (0)     | <0.0001 | 0.0007 |
| NOJIMA SFRP2 TARGETS DN                               | 25       | 4 (16)    | 4 (16)    | 0 (0)     | <0.0001 | 0.0007 |
| ZHANG ANTIVIRAL RESPONSE TO RIBAVIRIN UP              | 29       | 4 (13.8)  | 4 (13.8)  | 0 (0)     | <0.0001 | 0.0007 |
| ICHIBA GRAFT VERSUS HOST DISEASE 35D UP               | 126      | 6 (4.8)   | 6 (4.8)   | 0 (0)     | <0.0001 | 0.001  |
| GEISS RESPONSE TO DSRNA UP                            | 35       | 4 (11.4)  | 4 (11.4)  | 0 (0)     | <0.0001 | 0.001  |
| PEDRIOLI MIR31 TARGETS DN                             | 398      | 10 (2.5)  | 10 (2.5)  | 0 (0)     | <0.0001 | 0.0013 |
| HIRSCH CELLULAR TRANSFORMATION SIGNATURE UP           | 239      | 8 (3.3)   | 7 (2.9)   | 1 (0.4)   | <0.0001 | 0.0013 |
| JACKSON DNMT1 TARGETS UP                              | 76       | 5 (6.6)   | 5 (6.6)   | 0 (0)     | <0.0001 | 0.0013 |
| HASEGAWA TUMORIGENESIS BY RET C634R                   | 11       | 3 (27.3)  | 3 (27.3)  | 0 (0)     | <0.0001 | 0.0013 |
| LEE RECENT THYMIC EMIGRANT                            | 217      | 7 (3.2)   | 4 (1.8)   | 3 (1.4)   | <0.0001 | 0.0016 |
| CHEBOTAEV GR TARGETS UP                               | 77       | 5 (6.5)   | 4 (5.2)   | 1 (1.3)   | <0.0001 | 0.0016 |
| HESS TARGETS OF HOXA9 AND MEIS1 DN                    | 76       | 5 (6.6)   | 5 (6.6)   | 0 (0)     | <0.0001 | 0.0016 |
| WATANABE ULCERATIVE COLITIS WITH CANCER DN            | 13       | 3 (23.1)  | 3 (23.1)  | 0 (0)     | <0.0001 | 0.0016 |
| CHICAS RB1 TARGETS SENESCENT                          | 552      | 11 (2)    | 11 (2)    | 0 (0)     | <0.0001 | 0.0019 |
| ACEVEDO FGFR1 TARGETS IN PROSTATE CANCER MODEL UP     | 278      | 8 (2.9)   | 8 (2.9)   | 0 (0)     | <0.0001 | 0.0019 |



| Category Name                             | Category<br>Genes # | Any-reg.<br>SDEG #(%) | Up-reg.<br>SDEG #(%) | Down-reg.<br>SDEG #(%) | P       | FDR    |
|-------------------------------------------|---------------------|-----------------------|----------------------|------------------------|---------|--------|
| LEE BMP2 TARGETS UP                       | 723                 | 12 (1.7)              | 12 (1.7)             | 0 (0)                  | <0.0001 | 0.0028 |
| CHARAFE BREAST CANCER LUMINAL VS BASAL DN | 440                 | 10 (2.3)              | 9 (2)                | 1 (0.2)                | <0.0001 | 0.0028 |
| RUTELLA RESPONSE TO CSF2RB AND IL4 DN     | 303                 | 8 (2.6)               | 8 (2.6)              | 0 (0)                  | 0.0001  | 0.0033 |
| FOSTER KDM1A TARGETS UP                   | 250                 | 7 (2.8)               | 7 (2.8)              | 0 (0)                  | 0.0001  | 0.0033 |
| LU EZH2 TARGETS UP                        | 289                 | 7 (2.4)               | 7 (2.4)              | 0 (0)                  | 0.0001  | 0.0033 |
| SEKI INFLAMMATORY RESPONSE LPS UP         | 77                  | 5 (6.5)               | 5 (6.5)              | 0 (0)                  | 0.0001  | 0.0033 |
| LEE LIVER CANCER MYC TGFA UP              | 62                  | 4 (6.5)               | 4 (6.5)              | 0 (0)                  | 0.0001  | 0.0041 |
| BOYLAN MULTIPLE MYELOMA C D DN            | 244                 | 7 (2.9)               | 7 (2.9)              | 0 (0)                  | 0.0001  | 0.0044 |
| HOSHIDA LIVER CANCER SUBCLASS S3          | 259                 | 7 (2.7)               | 7 (2.7)              | 0 (0)                  | 0.0002  | 0.0049 |
| ALCALAY AML BY NPM1 LOCALIZATION DN       | 178                 | 6 (3.4)               | 5 (2.8)              | 1 (0.6)                | 0.0002  | 0.0049 |
| SENGUPTA NASOPHARYNGEAL CARCINOMA UP      | 287                 | 8 (2.8)               | 8 (2.8)              | 0 (0)                  | 0.0002  | 0.0051 |
| BROWNE HCMV INFECTION 12HR UP             | 105                 | 5 (4.8)               | 5 (4.8)              | 0 (0)                  | 0.0002  | 0.0052 |
| MIKKELSEN MEF LCP WITH H3K4ME3            | 121                 | 5 (4.1)               | 5 (4.1)              | 0 (0)                  | 0.0002  | 0.0052 |
| KANG GIST WITH PDGFRA UP                  | 50                  | 4 (8)                 | 4 (8)                | 0 (0)                  | 0.0002  | 0.0052 |
| POOLA INVASIVE BREAST CANCER UP           | 272                 | 7 (2.6)               | 7 (2.6)              | 0 (0)                  | 0.0002  | 0.0055 |
| PEREZ TP53 TARGETS                        | 1124                | 16 (1.4)              | 15 (1.3)             | 1 (0.1)                | 0.0002  | 0.0057 |
| AMIT EGF RESPONSE 480 HELA                | 164                 | 6 (3.7)               | 6 (3.7)              | 0 (0)                  | 0.0002  | 0.0057 |
| LINDSTEDT DENDRITIC CELL MATURATION A     | 67                  | 4 (6)                 | 4 (6)                | 0 (0)                  | 0.0002  | 0.0059 |
| SMID BREAST CANCER NORMAL LIKE UP         | 443                 | 9 (2)                 | 9 (2)                | 0 (0)                  | 0.0002  | 0.0063 |
| WANG SMARCE1 TARGETS DN                   | 340                 | 8 (2.4)               | 7 (2.1)              | 1 (0.3)                | 0.0002  | 0.0063 |
| TAVOR CEBPA TARGETS DN                    | 30                  | 3 (10)                | 3 (10)               | 0 (0)                  | 0.0002  | 0.0063 |
| HOLLMANN APOPTOSIS VIA CD40 DN            | 259                 | 7 (2.7)               | 6 (2.3)              | 1 (0.4)                | 0.0002  | 0.0064 |
| GILDEA METASTASIS                         | 30                  | 3 (10)                | 3 (10)               | 0 (0)                  | 0.0002  | 0.0064 |
| HAN SATB1 TARGETS DN                      | 421                 | 9 (2.1)               | 9 (2.1)              | 0 (0)                  | 0.0003  | 0.0074 |
| ONDER CDH1 TARGETS 2 DN                   | 454                 | 9 (2)                 | 8 (1.8)              | 1 (0.2)                | 0.0003  | 0.0081 |
| ROZANOV MMP14 TARGETS UP                  | 270                 | 7 (2.6)               | 6 (2.2)              | 1 (0.4)                | 0.0003  | 0.0086 |
| GROSS ELK3 TARGETS DN                     | 32                  | 3 (9.4)               | 3 (9.4)              | 0 (0)                  | 0.0004  | 0.009  |
| GAUSSMANN MLL AF4 FUSION TARGETS G DN     | 30                  | 3 (10)                | 3 (10)               | 0 (0)                  | 0.0004  | 0.0092 |

**Table A96:** Significantly enriched MSigDB Chemical/Genetic Perturbation Sets (RNA-Seq, Neutrophils, Day 3). Results sorted by FDR and #SDEG genes.

| Category Name                                | Category<br>Genes # | Any-reg.<br>SDEG #(%) | Up-reg.<br>SDEG #(%) | Down-reg.<br>SDEG #(%) | P       | FDR   |
|----------------------------------------------|---------------------|-----------------------|----------------------|------------------------|---------|-------|
| HECKER IFNB1 TARGETS                         | 92                  | 9 (9.8)               | 9 (9.8)              | 0 (0)                  | <0.0001 | 0.001 |
| TAKEDA TARGETS OF NUP98 HOXA9 FUSION 3D UP   | 178                 | 8 (4.5)               | 8 (4.5)              | 0 (0)                  | <0.0001 | 0.001 |
| GRAESSMANN APOPTOSIS BY SERUM DEPRIVATION UP | 541                 | 7 (1.3)               | 7 (1.3)              | 0 (0)                  | <0.0001 | 0.001 |
| NUYTEN EZH2 TARGETS UP                       | 1002                | 7 (0.7)               | 7 (0.7)              | 0 (0)                  | <0.0001 | 0.001 |
| TAKEDA TARGETS OF NUP98 HOXA9 FUSION 10D UP  | 186                 | 7 (3.8)               | 7 (3.8)              | 0 (0)                  | <0.0001 | 0.001 |

| Category Name                                         | Category<br>Genes # | Any-reg.<br>SDEG #(%) | Up-reg.<br>SDEG #(%) | Down-reg.<br>SDEG #(%) | P       | FDR    |
|-------------------------------------------------------|---------------------|-----------------------|----------------------|------------------------|---------|--------|
| FULCHER INFLAMMATORY RESPONSE LECTIN VS LPS DN        | 462                 | 6 (1.3)               | 6 (1.3)              | 0 (0)                  | <0.0001 | 0.001  |
| GRAESSMANN RESPONSE TO MC AND SERUM DEPRIVATION UP    | 203                 | 6 (3)                 | 6 (3)                | 0 (0)                  | <0.0001 | 0.001  |
| MOSERLE IFNA RESPONSE                                 | 31                  | 6 (19.4)              | 6 (19.4)             | 0 (0)                  | <0.0001 | 0.001  |
| TAKEDA TARGETS OF NUP98 HOXA9 FUSION 16D UP           | 169                 | 6 (3.6)               | 6 (3.6)              | 0 (0)                  | <0.0001 | 0.001  |
| TAKEDA TARGETS OF NUP98 HOXA9 FUSION 8D UP            | 155                 | 6 (3.9)               | 6 (3.9)              | 0 (0)                  | <0.0001 | 0.001  |
| WALLACE PROSTATE CANCER RACE UP                       | 275                 | 6 (2.2)               | 6 (2.2)              | 0 (0)                  | <0.0001 | 0.001  |
| BROWNE INTERFERON RESPONSIVE GENES                    | 68                  | 5 (7.4)               | 5 (7.4)              | 0 (0)                  | <0.0001 | 0.001  |
| SANA TNF SIGNALING UP                                 | 81                  | 5 (6.2)               | 5 (6.2)              | 0 (0)                  | <0.0001 | 0.001  |
| ALTEMEIER RESPONSE TO LPS WITH MECHANICAL VENTILATION | 126                 | 4 (3.2)               | 4 (3.2)              | 0 (0)                  | <0.0001 | 0.001  |
| BOSCO INTERFERON INDUCED ANTIVIRAL MODULE             | 76                  | 4 (5.3)               | 4 (5.3)              | 0 (0)                  | <0.0001 | 0.001  |
| DER IFN ALPHA RESPONSE UP                             | 74                  | 4 (5.4)               | 4 (5.4)              | 0 (0)                  | <0.0001 | 0.001  |
| DER IFN BETA RESPONSE UP                              | 101                 | 4 (4)                 | 4 (4)                | 0 (0)                  | <0.0001 | 0.001  |
| DER IFN GAMMA RESPONSE UP                             | 72                  | 4 (5.6)               | 4 (5.6)              | 0 (0)                  | <0.0001 | 0.001  |
| FARMER BREAST CANCER CLUSTER 1                        | 39                  | 4 (10.3)              | 4 (10.3)             | 0 (0)                  | <0.0001 | 0.001  |
| ICHIBA GRAFT VERSUS HOST DISEASE D7 UP                | 105                 | 4 (3.8)               | 4 (3.8)              | 0 (0)                  | <0.0001 | 0.001  |
| JISON SICKLE CELL DISEASE UP                          | 174                 | 4 (2.3)               | 4 (2.3)              | 0 (0)                  | <0.0001 | 0.001  |
| KRIEG KDM3A TARGETS NOT HYPOXIA                       | 189                 | 4 (2.1)               | 4 (2.1)              | 0 (0)                  | <0.0001 | 0.001  |
| PLASARI TGFB1 TARGETS 10HR DN                         | 233                 | 4 (1.7)               | 4 (1.7)              | 0 (0)                  | <0.0001 | 0.001  |
| SANA RESPONSE TO IFNG UP                              | 74                  | 4 (5.4)               | 4 (5.4)              | 0 (0)                  | <0.0001 | 0.001  |
| BENNETT SYSTEMIC LUPUS ERYTHEMATOSUS                  | 32                  | 3 (9.4)               | 3 (9.4)              | 0 (0)                  | <0.0001 | 0.001  |
| BOWIE RESPONSE TO EXTRACELLULAR MATRIX                | 17                  | 3 (17.6)              | 3 (17.6)             | 0 (0)                  | <0.0001 | 0.001  |
| BOWIE RESPONSE TO TAMOXIFEN                           | 18                  | 3 (16.7)              | 3 (16.7)             | 0 (0)                  | <0.0001 | 0.001  |
| DAUER STAT3 TARGETS DN                                | 51                  | 3 (5.9)               | 3 (5.9)              | 0 (0)                  | <0.0001 | 0.001  |
| EINAV INTERFERON SIGNATURE IN CANCER                  | 27                  | 3 (11.1)              | 3 (11.1)             | 0 (0)                  | <0.0001 | 0.001  |
| LIANG SILENCED BY METHYLATION 2                       | 55                  | 3 (5.5)               | 3 (5.5)              | 0 (0)                  | <0.0001 | 0.001  |
| RADAEVA RESPONSE TO IFNA1 UP                          | 52                  | 3 (5.8)               | 3 (5.8)              | 0 (0)                  | <0.0001 | 0.001  |
| TSAI DNAJB4 TARGETS UP                                | 13                  | 3 (23.1)              | 3 (23.1)             | 0 (0)                  | <0.0001 | 0.001  |
| ZHANG INTERFERON RESPONSE                             | 23                  | 3 (13)                | 3 (13)               | 0 (0)                  | <0.0001 | 0.001  |
| BERTUCCI MEDULLARY VS DUCTAL BREAST CANCER UP         | 200                 | 4 (2)                 | 4 (2)                | 0 (0)                  | <0.0001 | 0.0017 |
| BENPORATH ES CORE NINE CORRELATED                     | 95                  | 3 (3.2)               | 3 (3.2)              | 0 (0)                  | <0.0001 | 0.0017 |
| LIU VAV3 PROSTATE CARCINOGENESIS UP                   | 85                  | 3 (3.5)               | 3 (3.5)              | 0 (0)                  | <0.0001 | 0.0017 |
| SEITZ NEOPLASTIC TRANSFORMATION BY 8P DELETION UP     | 69                  | 3 (4.3)               | 3 (4.3)              | 0 (0)                  | <0.0001 | 0.0017 |
| WUNDER INFLAMMATORY RESPONSE AND CHOLESTEROL UP       | 61                  | 3 (4.9)               | 3 (4.9)              | 0 (0)                  | <0.0001 | 0.0017 |
| GRANDVAUX IFN RESPONSE NOT VIA IRF3                   | 14                  | 2 (14.3)              | 2 (14.3)             | 0 (0)                  | <0.0001 | 0.0017 |
| HELLER SILENCED BY METHYLATION UP                     | 273                 | 4 (1.5)               | 4 (1.5)              | 0 (0)                  | <0.0001 | 0.0024 |
| GARGALOVIC RESPONSE TO OXIDIZED PHOSPHOLIPIDS GREY DN | 73                  | 3 (4.1)               | 3 (4.1)              | 0 (0)                  | <0.0001 | 0.0024 |
| RASHI NFKB1 TARGETS                                   | 19                  | 2 (10.5)              | 2 (10.5)             | 0 (0)                  | <0.0001 | 0.0024 |
| DEBIASI APOPTOSIS BY REOVIRUS INFECTION UP            | 317                 | 4 (1.3)               | 4 (1.3)              | 0 (0)                  | <0.0001 | 0.0031 |

| Category Name                        | Category | Any-reg.   | Up-reg.    | Down-reg.  | P       | FDR    |
|--------------------------------------|----------|------------|------------|------------|---------|--------|
|                                      | Genes #  | SDEG #(% ) | SDEG #(% ) | SDEG #(% ) |         |        |
| RUAN RESPONSE TO TNF TROGLITAZONE UP | 17       | 2 (11.8)   | 2 (11.8)   | 0 (0)      | <0.0001 | 0.0031 |
| MARKEY RB1 ACUTE LOF UP              | 214      | 4 (1.9)    | 4 (1.9)    | 0 (0)      | <0.0001 | 0.0036 |
| ROETH TERT TARGETS UP                | 14       | 2 (14.3)   | 2 (14.3)   | 0 (0)      | <0.0001 | 0.0036 |
| RUAN RESPONSE TO TNF UP              | 12       | 2 (16.7)   | 2 (16.7)   | 0 (0)      | <0.0001 | 0.0036 |
| FEVR CTNNB1 TARGETS UP               | 672      | 5 (0.7)    | 5 (0.7)    | 0 (0)      | <0.0001 | 0.0062 |
| GRANDVAUX IRF3 TARGETS UP            | 15       | 2 (13.3)   | 2 (13.3)   | 0 (0)      | <0.0001 | 0.0062 |
| YAN ESCAPE FROM ANOIKIS              | 24       | 2 (8.3)    | 2 (8.3)    | 0 (0)      | 0.0001  | 0.0088 |

**Table A97:** Significantly enriched MSigDB Chemical/Genetic Perturbation Sets (RNA-Seq, NK-cells, Day 1). Results sorted by FDR and #SDEG genes.

| Category Name                           | Category | Any-reg.   | Up-reg.    | Down-reg.  | P       | FDR    |
|-----------------------------------------|----------|------------|------------|------------|---------|--------|
|                                         | Genes #  | SDEG #(% ) | SDEG #(% ) | SDEG #(% ) |         |        |
| Cell cycle                              | 113      | 13 (11.5)  | 12 (10.6)  | 1 (0.9)    | <0.0001 | 0.0006 |
| MicroRNAs in cancer                     | 228      | 7 (3.1)    | 7 (3.1)    | 0 (0)      | <0.0001 | 0.0006 |
| Oocyte meiosis                          | 97       | 6 (6.2)    | 6 (6.2)    | 0 (0)      | <0.0001 | 0.0006 |
| Progesterone-mediated oocyte maturation | 74       | 5 (6.8)    | 5 (6.8)    | 0 (0)      | <0.0001 | 0.0006 |
| Hepatitis B                             | 131      | 5 (3.8)    | 5 (3.8)    | 0 (0)      | <0.0001 | 0.0006 |
| p53 signaling pathway                   | 62       | 4 (6.5)    | 4 (6.5)    | 0 (0)      | <0.0001 | 0.001  |

**Table A98:** Significantly enriched KEGG Pathways (RNA-Seq, NK-cells, Day 3). Results sorted by FDR and #SDEG genes.

| Category Name                          | Category | Any-reg.   | Up-reg.    | Down-reg.  | P       | FDR    |
|----------------------------------------|----------|------------|------------|------------|---------|--------|
|                                        | Genes #  | SDEG #(% ) | SDEG #(% ) | SDEG #(% ) |         |        |
| CELL CYCLE GO 0007049                  | 308      | 25 (8.1)   | 24 (7.8)   | 1 (0.3)    | <0.0001 | 0.0003 |
| CELL CYCLE PROCESS                     | 188      | 23 (12.2)  | 22 (11.7)  | 1 (0.5)    | <0.0001 | 0.0003 |
| MITOTIC CELL CYCLE                     | 149      | 22 (14.8)  | 21 (14.1)  | 1 (0.7)    | <0.0001 | 0.0003 |
| CELL CYCLE PHASE                       | 165      | 20 (12.1)  | 19 (11.5)  | 1 (0.6)    | <0.0001 | 0.0003 |
| M PHASE                                | 112      | 17 (15.2)  | 17 (15.2)  | 0 (0)      | <0.0001 | 0.0003 |
| M PHASE OF MITOTIC CELL CYCLE          | 84       | 17 (20.2)  | 17 (20.2)  | 0 (0)      | <0.0001 | 0.0003 |
| MITOSIS                                | 81       | 16 (19.8)  | 16 (19.8)  | 0 (0)      | <0.0001 | 0.0003 |
| ORGANELLE ORGANIZATION AND BIOGENESIS  | 449      | 12 (2.7)   | 12 (2.7)   | 0 (0)      | <0.0001 | 0.0003 |
| REGULATION OF CELL CYCLE               | 179      | 11 (6.1)   | 10 (5.6)   | 1 (0.6)    | <0.0001 | 0.0003 |
| CELL PROLIFERATION GO 0008283          | 493      | 10 (2)     | 9 (1.8)    | 1 (0.2)    | <0.0001 | 0.0003 |
| REGULATION OF MITOSIS                  | 41       | 9 (22)     | 9 (22)     | 0 (0)      | <0.0001 | 0.0003 |
| CHROMOSOME SEGREGATION                 | 31       | 8 (25.8)   | 8 (25.8)   | 0 (0)      | <0.0001 | 0.0003 |
| CHROMOSOME ORGANIZATION AND BIOGENESIS | 116      | 7 (6)      | 7 (6)      | 0 (0)      | <0.0001 | 0.0003 |
| MITOTIC SISTER CHROMATID SEGREGATION   | 15       | 6 (40)     | 6 (40)     | 0 (0)      | <0.0001 | 0.0003 |

| Category Name                                          | Category<br>Genes # | Any-reg.<br>SDEG #(%) | Up-reg.<br>SDEG #(%) | Down-reg.<br>SDEG #(%) | P       | FDR    |
|--------------------------------------------------------|---------------------|-----------------------|----------------------|------------------------|---------|--------|
| SISTER CHROMATID SEGREGATION                           | 16                  | 6 (37.5)              | 6 (37.5)             | 0 (0)                  | <0.0001 | 0.0003 |
| CELL CYCLE CHECKPOINT GO 0000075                       | 48                  | 5 (10.4)              | 5 (10.4)             | 0 (0)                  | <0.0001 | 0.0003 |
| ESTABLISHMENT OF ORGANELLE LOCALIZATION                | 17                  | 5 (29.4)              | 5 (29.4)             | 0 (0)                  | <0.0001 | 0.0003 |
| INTERPHASE                                             | 65                  | 5 (7.7)               | 4 (6.2)              | 1 (1.5)                | <0.0001 | 0.0003 |
| INTERPHASE OF MITOTIC CELL CYCLE                       | 59                  | 5 (8.5)               | 4 (6.8)              | 1 (1.7)                | <0.0001 | 0.0003 |
| ORGANELLE LOCALIZATION                                 | 24                  | 5 (20.8)              | 5 (20.8)             | 0 (0)                  | <0.0001 | 0.0003 |
| CELL DIVISION                                          | 19                  | 4 (21.1)              | 4 (21.1)             | 0 (0)                  | <0.0001 | 0.0003 |
| CHROMOSOME CONDENSATION                                | 10                  | 4 (40)                | 4 (40)               | 0 (0)                  | <0.0001 | 0.0003 |
| CYTOKINESIS                                            | 17                  | 4 (23.5)              | 4 (23.5)             | 0 (0)                  | <0.0001 | 0.0003 |
| DNA PACKAGING                                          | 32                  | 4 (12.5)              | 4 (12.5)             | 0 (0)                  | <0.0001 | 0.0003 |
| MICROTUBULE CYTOSKELETON ORGANIZATION AND BIOGENESIS   | 31                  | 4 (12.9)              | 4 (12.9)             | 0 (0)                  | <0.0001 | 0.0003 |
| MITOTIC CELL CYCLE CHECKPOINT                          | 21                  | 4 (19)                | 4 (19)               | 0 (0)                  | <0.0001 | 0.0003 |
| MICROTUBULE BASED PROCESS                              | 75                  | 4 (5.3)               | 4 (5.3)              | 0 (0)                  | <0.0001 | 0.0015 |
| CYTOSKELETON ORGANIZATION AND BIOGENESIS               | 196                 | 5 (2.6)               | 5 (2.6)              | 0 (0)                  | <0.0001 | 0.0021 |
| REGULATION OF CYCLIN DEPENDENT PROTEIN KINASE ACTIVITY | 43                  | 3 (7)                 | 2 (4.7)              | 1 (2.3)                | 0.0001  | 0.0031 |
| ESTABLISHMENT OF CELLULAR LOCALIZATION                 | 341                 | 6 (1.8)               | 6 (1.8)              | 0 (0)                  | 0.0001  | 0.0036 |
| CELLULAR LOCALIZATION                                  | 359                 | 6 (1.7)               | 6 (1.7)              | 0 (0)                  | 0.0002  | 0.0043 |
| MITOTIC SPINDLE ORGANIZATION AND BIOGENESIS            | 9                   | 2 (22.2)              | 2 (22.2)             | 0 (0)                  | 0.0002  | 0.0045 |
| SPINDLE ORGANIZATION AND BIOGENESIS                    | 10                  | 2 (20)                | 2 (20)               | 0 (0)                  | 0.0002  | 0.0045 |
| G1 PHASE OF MITOTIC CELL CYCLE                         | 11                  | 2 (18.2)              | 1 (9.1)              | 1 (9.1)                | 0.0003  | 0.007  |

**Table A99:** Significantly enriched MSigDB GO Biological Processes (RNA-Seq, NK-cells, Day 3). Results sorted by FDR and #SDEG genes.

| Category Name                              | Category<br>Genes # | Any-reg.<br>SDEG #(%) | Up-reg.<br>SDEG #(%) | Down-reg.<br>SDEG #(%) | P       | FDR    |
|--------------------------------------------|---------------------|-----------------------|----------------------|------------------------|---------|--------|
| INTRACELLULAR ORGANELLE PART               | 1155                | 19 (1.6)              | 19 (1.6)             | 0 (0)                  | <0.0001 | 0.0001 |
| ORGANELLE PART                             | 1160                | 19 (1.6)              | 19 (1.6)             | 0 (0)                  | <0.0001 | 0.0001 |
| INTRACELLULAR NON MEMBRANE BOUND ORGANELLE | 607                 | 18 (3)                | 18 (3)               | 0 (0)                  | <0.0001 | 0.0001 |
| NON MEMBRANE BOUND ORGANELLE               | 607                 | 18 (3)                | 18 (3)               | 0 (0)                  | <0.0001 | 0.0001 |
| CYTOSKELETAL PART                          | 225                 | 14 (6.2)              | 14 (6.2)             | 0 (0)                  | <0.0001 | 0.0001 |
| CYTOSKELETON                               | 347                 | 14 (4)                | 14 (4)               | 0 (0)                  | <0.0001 | 0.0001 |
| MACROMOLECULAR COMPLEX                     | 925                 | 13 (1.4)              | 13 (1.4)             | 0 (0)                  | <0.0001 | 0.0001 |
| MICROTUBULE CYTOSKELETON                   | 146                 | 13 (8.9)              | 13 (8.9)             | 0 (0)                  | <0.0001 | 0.0001 |
| NUCLEUS                                    | 1353                | 13 (1)                | 13 (1)               | 0 (0)                  | <0.0001 | 0.0001 |
| PROTEIN COMPLEX                            | 801                 | 13 (1.6)              | 13 (1.6)             | 0 (0)                  | <0.0001 | 0.0001 |
| CHROMOSOME                                 | 130                 | 8 (6.2)               | 8 (6.2)              | 0 (0)                  | <0.0001 | 0.0001 |
| SPINDLE                                    | 38                  | 8 (21.1)              | 8 (21.1)             | 0 (0)                  | <0.0001 | 0.0001 |
| CHROMOSOMAL PART                           | 106                 | 7 (6.6)               | 7 (6.6)              | 0 (0)                  | <0.0001 | 0.0001 |

| Category Name                      | Category | Any-reg.   | Up-reg.    | Down-reg.  | P       | FDR    |
|------------------------------------|----------|------------|------------|------------|---------|--------|
|                                    | Genes #  | SDEG #(% ) | SDEG #(% ) | SDEG #(% ) |         |        |
| MICROTUBULE ORGANIZING CENTER      | 65       | 7 (10.8)   | 7 (10.8)   | 0 (0)      | <0.0001 | 0.0001 |
| CENTROSOME                         | 56       | 6 (10.7)   | 6 (10.7)   | 0 (0)      | <0.0001 | 0.0001 |
| CHROMOSOME PERICENTRIC REGION      | 31       | 6 (19.4)   | 6 (19.4)   | 0 (0)      | <0.0001 | 0.0001 |
| KINETOCHORE                        | 25       | 5 (20)     | 5 (20)     | 0 (0)      | <0.0001 | 0.0001 |
| SPINDLE POLE                       | 18       | 4 (22.2)   | 4 (22.2)   | 0 (0)      | <0.0001 | 0.0001 |
| KINESIN COMPLEX                    | 15       | 3 (20)     | 3 (20)     | 0 (0)      | <0.0001 | 0.0002 |
| CYTOPLASM                          | 2054     | 15 (0.7)   | 14 (0.7)   | 1 (0)      | <0.0001 | 0.0003 |
| CYTOPLASMIC PART                   | 1335     | 11 (0.8)   | 11 (0.8)   | 0 (0)      | 0.0002  | 0.0019 |
| MICROTUBULE ASSOCIATED COMPLEX     | 45       | 3 (6.7)    | 3 (6.7)    | 0 (0)      | 0.0002  | 0.002  |
| SPINDLE MICROTUBULE                | 15       | 2 (13.3)   | 2 (13.3)   | 0 (0)      | 0.0007  | 0.0068 |
| MICROTUBULE ORGANIZING CENTER PART | 18       | 2 (11.1)   | 2 (11.1)   | 0 (0)      | 0.0009  | 0.0084 |

**Table A100:** Significantly enriched MSigDB GO Cellular Components (RNA-Seq, NK-cells, Day 3). Results sorted by FDR and #SDEG genes.

| Category Name              | Category | Any-reg.   | Up-reg.    | Down-reg.  | P       | FDR    |
|----------------------------|----------|------------|------------|------------|---------|--------|
|                            | Genes #  | SDEG #(% ) | SDEG #(% ) | SDEG #(% ) |         |        |
| MICROTUBULE MOTOR ACTIVITY | 15       | 3 (20)     | 3 (20)     | 0 (0)      | <0.0001 | 0.0079 |

**Table A101:** Significantly enriched MSigDB GO Molecular Functions (RNA-Seq, NK-cells, Day 3). Results sorted by FDR and #SDEG genes.

| Category Name              | Category | Any-reg.   | Up-reg.    | Down-reg.  | P       | FDR    |
|----------------------------|----------|------------|------------|------------|---------|--------|
|                            | Genes #  | SDEG #(% ) | SDEG #(% ) | SDEG #(% ) |         |        |
| BIOCARTA CELLCYCLE PATHWAY | 23       | 4 (17.4)   | 4 (17.4)   | 0 (0)      | <0.0001 | 0.0011 |
| BIOCARTA G1 PATHWAY        | 28       | 4 (14.3)   | 4 (14.3)   | 0 (0)      | <0.0001 | 0.0011 |

**Table A102:** Significantly enriched MSigDB BioCarta Pathways (RNA-Seq, NK-cells, Day 3). Results sorted by FDR and #SDEG genes.

| Category Name                             | Category | Any-reg.   | Up-reg.    | Down-reg.  | P       | FDR    |
|-------------------------------------------|----------|------------|------------|------------|---------|--------|
|                                           | Genes #  | SDEG #(% ) | SDEG #(% ) | SDEG #(% ) |         |        |
| KINSEY TARGETS OF EWSR1 FLII FUSION UP    | 1244     | 55 (4.4)   | 55 (4.4)   | 0 (0)      | <0.0001 | 0.0002 |
| GOBERT OLIGODENDROCYTE DIFFERENTIATION UP | 554      | 54 (9.7)   | 54 (9.7)   | 0 (0)      | <0.0001 | 0.0002 |
| DUTERTRE ESTRADIOL RESPONSE 24HR UP       | 313      | 51 (16.3)  | 51 (16.3)  | 0 (0)      | <0.0001 | 0.0002 |
| DODD NASOPHARYNGEAL CARCINOMA DN          | 1330     | 47 (3.5)   | 47 (3.5)   | 0 (0)      | <0.0001 | 0.0002 |
| NUYTEN EZH2 TARGETS DN                    | 985      | 47 (4.8)   | 47 (4.8)   | 0 (0)      | <0.0001 | 0.0002 |
| SHEDDEN LUNG CANCER POOR SURVIVAL A6      | 453      | 46 (10.2)  | 46 (10.2)  | 0 (0)      | <0.0001 | 0.0002 |
| MARSON BOUND BY E2F4 UNSTIMULATED         | 722      | 45 (6.2)   | 45 (6.2)   | 0 (0)      | <0.0001 | 0.0002 |

| Category Name                                 | Category<br>Genes # | Any-reg.<br>SDEG #(%) | Up-reg.<br>SDEG #(%) | Down-reg.<br>SDEG #(%) | P       | FDR    |
|-----------------------------------------------|---------------------|-----------------------|----------------------|------------------------|---------|--------|
| ROSTY CERVICAL CANCER PROLIFERATION CLUSTER   | 137                 | 45 (32.8)             | 45 (32.8)            | 0 (0)                  | <0.0001 | 0.0002 |
| SOTIRIOU BREAST CANCER GRADE 1 VS 3 UP        | 157                 | 43 (27.4)             | 43 (27.4)            | 0 (0)                  | <0.0001 | 0.0002 |
| BENPORATH CYCLING GENES                       | 653                 | 42 (6.4)              | 42 (6.4)             | 0 (0)                  | <0.0001 | 0.0002 |
| KOBAYASHI EGFR SIGNALING 24HR DN              | 260                 | 41 (15.8)             | 41 (15.8)            | 0 (0)                  | <0.0001 | 0.0002 |
| VECCHI GASTRIC CANCER EARLY UP                | 413                 | 40 (9.7)              | 40 (9.7)             | 0 (0)                  | <0.0001 | 0.0002 |
| HORIUCHI WTAP TARGETS DN                      | 308                 | 39 (12.7)             | 39 (12.7)            | 0 (0)                  | <0.0001 | 0.0002 |
| PATIL LIVER CANCER                            | 729                 | 34 (4.7)              | 34 (4.7)             | 0 (0)                  | <0.0001 | 0.0002 |
| CAIRO HEPATOBLASTOMA CLASSES UP               | 585                 | 33 (5.6)              | 33 (5.6)             | 0 (0)                  | <0.0001 | 0.0002 |
| CHANG CYCLING GENES                           | 141                 | 33 (23.4)             | 33 (23.4)            | 0 (0)                  | <0.0001 | 0.0002 |
| PUJANA BRCA1 PCC NETWORK                      | 1608                | 33 (2.1)              | 33 (2.1)             | 0 (0)                  | <0.0001 | 0.0002 |
| GRAHAM CML DIVIDING VS NORMAL QUIESCENT UP    | 175                 | 32 (18.3)             | 32 (18.3)            | 0 (0)                  | <0.0001 | 0.0002 |
| BERENJENO TRANSFORMED BY RHOA UP              | 520                 | 30 (5.8)              | 30 (5.8)             | 0 (0)                  | <0.0001 | 0.0002 |
| CASORELLI ACUTE PROMYELOCYTIC LEUKEMIA DN     | 624                 | 30 (4.8)              | 30 (4.8)             | 0 (0)                  | <0.0001 | 0.0002 |
| CHIANG LIVER CANCER SUBCLASS PROLIFERATION UP | 183                 | 30 (16.4)             | 30 (16.4)            | 0 (0)                  | <0.0001 | 0.0002 |
| LEE EARLY T LYMPHOCYTE UP                     | 101                 | 30 (29.7)             | 30 (29.7)            | 0 (0)                  | <0.0001 | 0.0002 |
| WHITEFORD PEDIATRIC CANCER MARKERS            | 127                 | 30 (23.6)             | 30 (23.6)            | 0 (0)                  | <0.0001 | 0.0002 |
| BASAKI YBX1 TARGETS UP                        | 285                 | 29 (10.2)             | 29 (10.2)            | 0 (0)                  | <0.0001 | 0.0002 |
| GEORGES TARGETS OF MIR192 AND MIR215          | 858                 | 29 (3.4)              | 29 (3.4)             | 0 (0)                  | <0.0001 | 0.0002 |
| JOHNSTONE PARVB TARGETS 3 DN                  | 885                 | 29 (3.3)              | 29 (3.3)             | 0 (0)                  | <0.0001 | 0.0002 |
| PUJANA BRCA2 PCC NETWORK                      | 408                 | 29 (7.1)              | 29 (7.1)             | 0 (0)                  | <0.0001 | 0.0002 |
| BLUM RESPONSE TO SALIRASIB DN                 | 327                 | 27 (8.3)              | 27 (8.3)             | 0 (0)                  | <0.0001 | 0.0002 |
| GOLDRATH ANTIGEN RESPONSE                     | 333                 | 27 (8.1)              | 27 (8.1)             | 0 (0)                  | <0.0001 | 0.0002 |
| WANG RESPONSE TO GSK3 INHIBITOR SB216763 DN   | 379                 | 27 (7.1)              | 27 (7.1)             | 0 (0)                  | <0.0001 | 0.0002 |
| CHEMNITZ RESPONSE TO PROSTAGLANDIN E2 UP      | 140                 | 26 (18.6)             | 26 (18.6)            | 0 (0)                  | <0.0001 | 0.0002 |
| LINDGREN BLADDER CANCER CLUSTER 3 UP          | 324                 | 26 (8)                | 26 (8)               | 0 (0)                  | <0.0001 | 0.0002 |
| PUJANA CHEK2 PCC NETWORK                      | 779                 | 26 (3.3)              | 26 (3.3)             | 0 (0)                  | <0.0001 | 0.0002 |
| ZHANG TLX TARGETS 60HR DN                     | 269                 | 26 (9.7)              | 26 (9.7)             | 0 (0)                  | <0.0001 | 0.0002 |
| GRAHAM NORMAL QUIESCENT VS NORMAL DIVIDING DN | 85                  | 25 (29.4)             | 25 (29.4)            | 0 (0)                  | <0.0001 | 0.0002 |
| HOFFMANN LARGE TO SMALL PRE BII LYMPHOCYTE UP | 164                 | 25 (15.2)             | 25 (15.2)            | 0 (0)                  | <0.0001 | 0.0002 |
| LINDGREN BLADDER CANCER CLUSTER 1 DN          | 370                 | 25 (6.8)              | 25 (6.8)             | 0 (0)                  | <0.0001 | 0.0002 |
| MITSADES RESPONSE TO APLIDIN DN               | 246                 | 24 (9.8)              | 24 (9.8)             | 0 (0)                  | <0.0001 | 0.0002 |
| SARRIO EPITHELIAL MESENCHYMAL TRANSITION UP   | 189                 | 24 (12.7)             | 24 (12.7)            | 0 (0)                  | <0.0001 | 0.0002 |
| SMID BREAST CANCER BASAL UP                   | 607                 | 24 (4)                | 24 (4)               | 0 (0)                  | <0.0001 | 0.0002 |
| CROONQUIST IL6 DEPRIVATION DN                 | 97                  | 23 (23.7)             | 23 (23.7)            | 0 (0)                  | <0.0001 | 0.0002 |
| GAL LEUKEMIC STEM CELL DN                     | 244                 | 23 (9.4)              | 23 (9.4)             | 0 (0)                  | <0.0001 | 0.0002 |
| KIM WT1 TARGETS DN                            | 448                 | 23 (5.1)              | 23 (5.1)             | 0 (0)                  | <0.0001 | 0.0002 |
| MARKEY RB1 ACUTE LOF DN                       | 218                 | 23 (10.6)             | 23 (10.6)            | 0 (0)                  | <0.0001 | 0.0002 |
| NAKAYAMA SOFT TISSUE TUMORS PCA2 UP           | 82                  | 23 (28)               | 23 (28)              | 0 (0)                  | <0.0001 | 0.0002 |

| Category Name                                        | Category<br>Genes # | Any-reg.<br>SDEG #(%) | Up-reg.<br>SDEG #(%) | Down-reg.<br>SDEG #(%) | P       | FDR    |
|------------------------------------------------------|---------------------|-----------------------|----------------------|------------------------|---------|--------|
| POOLA INVASIVE BREAST CANCER UP                      | 272                 | 23 (8.5)              | 23 (8.5)             | 0 (0)                  | <0.0001 | 0.0002 |
| RODRIGUES THYROID CARCINOMA POORLY DIFFERENTIATED UP | 628                 | 23 (3.7)              | 23 (3.7)             | 0 (0)                  | <0.0001 | 0.0002 |
| ODONNELL TFRC TARGETS DN                             | 138                 | 22 (15.9)             | 22 (15.9)            | 0 (0)                  | <0.0001 | 0.0002 |
| SENGUPTA NASOPHARYNGEAL CARCINOMA UP                 | 287                 | 22 (7.7)              | 22 (7.7)             | 0 (0)                  | <0.0001 | 0.0002 |
| FERREIRA EWINGS SARCOMA UNSTABLE VS STABLE UP        | 165                 | 21 (12.7)             | 21 (12.7)            | 0 (0)                  | <0.0001 | 0.0002 |
| FEVR CTNNB1 TARGETS DN                               | 531                 | 21 (4)                | 21 (4)               | 0 (0)                  | <0.0001 | 0.0002 |
| GAVIN FOXP3 TARGETS CLUSTER P6                       | 85                  | 21 (24.7)             | 21 (24.7)            | 0 (0)                  | <0.0001 | 0.0002 |
| KANG DOXORUBICIN RESISTANCE UP                       | 56                  | 21 (37.5)             | 21 (37.5)            | 0 (0)                  | <0.0001 | 0.0002 |
| KONG E2F3 TARGETS                                    | 107                 | 21 (19.6)             | 21 (19.6)            | 0 (0)                  | <0.0001 | 0.0002 |
| RODRIGUES THYROID CARCINOMA ANAPLASTIC UP            | 707                 | 21 (3)                | 21 (3)               | 0 (0)                  | <0.0001 | 0.0002 |
| TOYOTA TARGETS OF MIR34B AND MIR34C                  | 463                 | 21 (4.5)              | 21 (4.5)             | 0 (0)                  | <0.0001 | 0.0002 |
| WONG EMBRYONIC STEM CELL CORE                        | 324                 | 21 (6.5)              | 20 (6.2)             | 1 (0.3)                | <0.0001 | 0.0002 |
| ZHOU CELL CYCLE GENES IN IR RESPONSE 24HR            | 126                 | 21 (16.7)             | 21 (16.7)            | 0 (0)                  | <0.0001 | 0.0002 |
| BENPORATH PROLIFERATION                              | 147                 | 20 (13.6)             | 20 (13.6)            | 0 (0)                  | <0.0001 | 0.0002 |
| MEISSNER BRAIN HCP WITH H3K4ME3 AND H3K27ME3         | 1060                | 20 (1.9)              | 19 (1.8)             | 1 (0.1)                | <0.0001 | 0.0002 |
| TIEN INTESTINE PROBIOTICS 24HR UP                    | 538                 | 20 (3.7)              | 20 (3.7)             | 0 (0)                  | <0.0001 | 0.0002 |
| WINNEPENNINGX MELANOMA METASTASIS UP                 | 159                 | 20 (12.6)             | 20 (12.6)            | 0 (0)                  | <0.0001 | 0.0002 |
| BURTON ADIPOGENESIS 3                                | 97                  | 19 (19.6)             | 19 (19.6)            | 0 (0)                  | <0.0001 | 0.0002 |
| MISSIAGLIA REGULATED BY METHYLATION DN               | 114                 | 19 (16.7)             | 19 (16.7)            | 0 (0)                  | <0.0001 | 0.0002 |
| RUIZ TNC TARGETS DN                                  | 140                 | 19 (13.6)             | 19 (13.6)            | 0 (0)                  | <0.0001 | 0.0002 |
| YANG BCL3 TARGETS UP                                 | 351                 | 19 (5.4)              | 19 (5.4)             | 0 (0)                  | <0.0001 | 0.0002 |
| BUYTAERT PHOTODYNAMIC THERAPY STRESS DN              | 618                 | 18 (2.9)              | 18 (2.9)             | 0 (0)                  | <0.0001 | 0.0002 |
| ISHIDA E2F TARGETS                                   | 52                  | 18 (34.6)             | 18 (34.6)            | 0 (0)                  | <0.0001 | 0.0002 |
| KRIEG HYPOXIA NOT VIA KDM3A                          | 718                 | 18 (2.5)              | 18 (2.5)             | 0 (0)                  | <0.0001 | 0.0002 |
| SHEPARD CRUSH AND BURN MUTANT DN                     | 186                 | 18 (9.7)              | 18 (9.7)             | 0 (0)                  | <0.0001 | 0.0002 |
| WEST ADRENOCORTICAL TUMOR UP                         | 291                 | 18 (6.2)              | 18 (6.2)             | 0 (0)                  | <0.0001 | 0.0002 |
| WHITFIELD CELL CYCLE G2 M                            | 212                 | 18 (8.5)              | 18 (8.5)             | 0 (0)                  | <0.0001 | 0.0002 |
| ALCALAY AML BY NPM1 LOCALIZATION DN                  | 178                 | 17 (9.6)              | 17 (9.6)             | 0 (0)                  | <0.0001 | 0.0002 |
| FUJII YBX1 TARGETS DN                                | 193                 | 17 (8.8)              | 17 (8.8)             | 0 (0)                  | <0.0001 | 0.0002 |
| LE EGR2 TARGETS UP                                   | 106                 | 17 (16)               | 16 (15.1)            | 1 (0.9)                | <0.0001 | 0.0002 |
| SHEPARD BMYB MORPHOLINO DN                           | 193                 | 17 (8.8)              | 17 (8.8)             | 0 (0)                  | <0.0001 | 0.0002 |
| TARTE PLASMA CELL VS PLASMABLAST DN                  | 297                 | 17 (5.7)              | 17 (5.7)             | 0 (0)                  | <0.0001 | 0.0002 |
| WHITFIELD CELL CYCLE G2                              | 178                 | 17 (9.6)              | 17 (9.6)             | 0 (0)                  | <0.0001 | 0.0002 |
| ZHENG GLIOBLASTOMA PLASTICITY UP                     | 252                 | 17 (6.7)              | 17 (6.7)             | 0 (0)                  | <0.0001 | 0.0002 |
| ZWANG TRANSIENTLY UP BY 1ST EGF PULSE ONLY           | 1723                | 17 (1)                | 17 (1)               | 0 (0)                  | <0.0001 | 0.0002 |
| AFFAR YY1 TARGETS DN                                 | 229                 | 16 (7)                | 16 (7)               | 0 (0)                  | <0.0001 | 0.0002 |
| BENPORATH ES 1                                       | 361                 | 16 (4.4)              | 16 (4.4)             | 0 (0)                  | <0.0001 | 0.0002 |
| CHICAS RB1 TARGETS GROWING                           | 233                 | 16 (6.9)              | 16 (6.9)             | 0 (0)                  | <0.0001 | 0.0002 |

| Category Name                               | Category<br>Genes # | Any-reg.<br>SDEG #(%) | Up-reg.<br>SDEG #(%) | Down-reg.<br>SDEG #(%) | P       | FDR    |
|---------------------------------------------|---------------------|-----------------------|----------------------|------------------------|---------|--------|
| CROONQUIST NRAS SIGNALING DN                | 72                  | 16 (22.2)             | 16 (22.2)            | 0 (0)                  | <0.0001 | 0.0002 |
| CUI TCF21 TARGETS 2 UP                      | 416                 | 16 (3.8)              | 16 (3.8)             | 0 (0)                  | <0.0001 | 0.0002 |
| LI WILMS TUMOR VS FETAL KIDNEY 1 DN         | 160                 | 16 (10)               | 16 (10)              | 0 (0)                  | <0.0001 | 0.0002 |
| RHEIN ALL GLUCOCORTICOID THERAPY DN         | 352                 | 16 (4.5)              | 16 (4.5)             | 0 (0)                  | <0.0001 | 0.0002 |
| TANG SENESENCE TP53 TARGETS DN              | 59                  | 16 (27.1)             | 16 (27.1)            | 0 (0)                  | <0.0001 | 0.0002 |
| ZHANG TLX TARGETS 36HR DN                   | 177                 | 16 (9)                | 16 (9)               | 0 (0)                  | <0.0001 | 0.0002 |
| ZHAN MULTIPLE MYELOMA PR UP                 | 42                  | 16 (38.1)             | 16 (38.1)            | 0 (0)                  | <0.0001 | 0.0002 |
| BIDUS METASTASIS UP                         | 199                 | 15 (7.5)              | 15 (7.5)             | 0 (0)                  | <0.0001 | 0.0002 |
| HAMAI APOPTOSIS VIA TRAIL UP                | 556                 | 15 (2.7)              | 15 (2.7)             | 0 (0)                  | <0.0001 | 0.0002 |
| MORI IMMATURE B LYMPHOCYTE DN               | 90                  | 15 (16.7)             | 15 (16.7)            | 0 (0)                  | <0.0001 | 0.0002 |
| MORI LARGE PRE BII LYMPHOCYTE UP            | 86                  | 15 (17.4)             | 15 (17.4)            | 0 (0)                  | <0.0001 | 0.0002 |
| PUJANA ATM PCC NETWORK                      | 1390                | 15 (1.1)              | 15 (1.1)             | 0 (0)                  | <0.0001 | 0.0002 |
| PUJANA XPRSS INT NETWORK                    | 163                 | 15 (9.2)              | 15 (9.2)             | 0 (0)                  | <0.0001 | 0.0002 |
| SHEPARD BMYB TARGETS                        | 74                  | 15 (20.3)             | 15 (20.3)            | 0 (0)                  | <0.0001 | 0.0002 |
| WHITFIELD CELL CYCLE LITERATURE             | 44                  | 15 (34.1)             | 15 (34.1)            | 0 (0)                  | <0.0001 | 0.0002 |
| COLINA TARGETS OF 4EBP1 AND 4EBP2           | 339                 | 14 (4.1)              | 14 (4.1)             | 0 (0)                  | <0.0001 | 0.0002 |
| CONCANNON APOPTOSIS BY EPOXOMICIN DN        | 172                 | 14 (8.1)              | 14 (8.1)             | 0 (0)                  | <0.0001 | 0.0002 |
| OXFORD RALA OR RALB TARGETS UP              | 45                  | 14 (31.1)             | 14 (31.1)            | 0 (0)                  | <0.0001 | 0.0002 |
| WEI MYCN TARGETS WITH E BOX                 | 766                 | 14 (1.8)              | 14 (1.8)             | 0 (0)                  | <0.0001 | 0.0002 |
| WILCOX PREPONSE TO ROGESTERONE UP           | 149                 | 14 (9.4)              | 14 (9.4)             | 0 (0)                  | <0.0001 | 0.0002 |
| WU APOPTOSIS BY CDKN1A VIA TP53             | 55                  | 14 (25.5)             | 14 (25.5)            | 0 (0)                  | <0.0001 | 0.0002 |
| ZHANG BREAST CANCER PROGENITORS UP          | 410                 | 14 (3.4)              | 14 (3.4)             | 0 (0)                  | <0.0001 | 0.0002 |
| CROONQUIST NRAS VS STROMAL STIMULATION DN   | 109                 | 13 (11.9)             | 13 (11.9)            | 0 (0)                  | <0.0001 | 0.0002 |
| MANALO HYPOXIA DN                           | 280                 | 13 (4.6)              | 13 (4.6)             | 0 (0)                  | <0.0001 | 0.0002 |
| MUELLER PLURINET                            | 302                 | 13 (4.3)              | 13 (4.3)             | 0 (0)                  | <0.0001 | 0.0002 |
| SASAKI ADULT T CELL LEUKEMIA                | 186                 | 13 (7)                | 13 (7)               | 0 (0)                  | <0.0001 | 0.0002 |
| SERVITJA LIVER HNF1A TARGETS UP             | 135                 | 13 (9.6)              | 12 (8.9)             | 1 (0.7)                | <0.0001 | 0.0002 |
| VANTVEER BREAST CANCER METASTASIS DN        | 117                 | 13 (11.1)             | 13 (11.1)            | 0 (0)                  | <0.0001 | 0.0002 |
| ZHOU CELL CYCLE GENES IN IR RESPONSE 6HR    | 84                  | 13 (15.5)             | 13 (15.5)            | 0 (0)                  | <0.0001 | 0.0002 |
| AMUNDSON GAMMA RADIATION RESPONSE           | 39                  | 12 (30.8)             | 12 (30.8)            | 0 (0)                  | <0.0001 | 0.0002 |
| BURTON ADIPOGENESIS PEAK AT 24HR            | 43                  | 12 (27.9)             | 12 (27.9)            | 0 (0)                  | <0.0001 | 0.0002 |
| FOURNIER ACINAR DEVELOPMENT LATE 2          | 269                 | 12 (4.5)              | 12 (4.5)             | 0 (0)                  | <0.0001 | 0.0002 |
| FURUKAWA DUSP6 TARGETS PCI35 DN             | 72                  | 12 (16.7)             | 12 (16.7)            | 0 (0)                  | <0.0001 | 0.0002 |
| GARCIA TARGETS OF FLI1 AND DAX1 DN          | 179                 | 12 (6.7)              | 12 (6.7)             | 0 (0)                  | <0.0001 | 0.0002 |
| GRAHAM CML QUIESCENT VS NORMAL QUIESCENT UP | 84                  | 12 (14.3)             | 12 (14.3)            | 0 (0)                  | <0.0001 | 0.0002 |
| LEE BMP2 TARGETS DN                         | 856                 | 12 (1.4)              | 12 (1.4)             | 0 (0)                  | <0.0001 | 0.0002 |
| MARTENS TRETINOIN RESPONSE DN               | 823                 | 12 (1.5)              | 12 (1.5)             | 0 (0)                  | <0.0001 | 0.0002 |
| PEDERSEN METASTASIS BY ERBB2 ISOFORM 7      | 401                 | 12 (3)                | 12 (3)               | 0 (0)                  | <0.0001 | 0.0002 |



| Category Name                                              | Category<br>Genes # | Any-reg.<br>SDEG #(%) | Up-reg.<br>SDEG #(%) | Down-reg.<br>SDEG #(%) | P       | FDR    |
|------------------------------------------------------------|---------------------|-----------------------|----------------------|------------------------|---------|--------|
| PETROVA ENDOTHELIUM LYMPHATIC VS BLOOD UP                  | 143                 | 12 (8.4)              | 11 (7.7)             | 1 (0.7)                | <0.0001 | 0.0002 |
| RHODES UNDIFFERENTIATED CANCER                             | 68                  | 12 (17.6)             | 12 (17.6)            | 0 (0)                  | <0.0001 | 0.0002 |
| WHITFIELD CELL CYCLE S                                     | 180                 | 12 (6.7)              | 12 (6.7)             | 0 (0)                  | <0.0001 | 0.0002 |
| FARMER BREAST CANCER CLUSTER 2                             | 32                  | 11 (34.4)             | 11 (34.4)            | 0 (0)                  | <0.0001 | 0.0002 |
| LIAO METASTASIS                                            | 505                 | 11 (2.2)              | 10 (2)               | 1 (0.2)                | <0.0001 | 0.0002 |
| MOLENAAR TARGETS OF CCND1 AND CDK4 DN                      | 54                  | 11 (20.4)             | 11 (20.4)            | 0 (0)                  | <0.0001 | 0.0002 |
| MORI PRE BI LYMPHOCYTE UP                                  | 79                  | 11 (13.9)             | 11 (13.9)            | 0 (0)                  | <0.0001 | 0.0002 |
| REICHERT MITOSIS LIN9 TARGETS                              | 29                  | 11 (37.9)             | 11 (37.9)            | 0 (0)                  | <0.0001 | 0.0002 |
| SMIRNOV RESPONSE TO IR 6HR DN                              | 113                 | 11 (9.7)              | 11 (9.7)             | 0 (0)                  | <0.0001 | 0.0002 |
| YU MYC TARGETS UP                                          | 42                  | 11 (26.2)             | 11 (26.2)            | 0 (0)                  | <0.0001 | 0.0002 |
| ZHANG TLX TARGETS UP                                       | 85                  | 11 (12.9)             | 11 (12.9)            | 0 (0)                  | <0.0001 | 0.0002 |
| CHICAS RB1 TARGETS SENESCENT                               | 552                 | 10 (1.8)              | 10 (1.8)             | 0 (0)                  | <0.0001 | 0.0002 |
| CREIGHTON ENDOCRINE THERAPY RESISTANCE 1                   | 500                 | 10 (2)                | 10 (2)               | 0 (0)                  | <0.0001 | 0.0002 |
| LY AGING OLD DN                                            | 56                  | 10 (17.9)             | 10 (17.9)            | 0 (0)                  | <0.0001 | 0.0002 |
| ODONNELL TARGETS OF MYC AND TFRC DN                        | 44                  | 10 (22.7)             | 10 (22.7)            | 0 (0)                  | <0.0001 | 0.0002 |
| PUJANA BRCA CENTERED NETWORK                               | 113                 | 10 (8.8)              | 10 (8.8)             | 0 (0)                  | <0.0001 | 0.0002 |
| VANTVEER BREAST CANCER ESR1 DN                             | 232                 | 10 (4.3)              | 10 (4.3)             | 0 (0)                  | <0.0001 | 0.0002 |
| CHARAFE BREAST CANCER LUMINAL VS MESENCHYMAL DN            | 447                 | 9 (2)                 | 9 (2)                | 0 (0)                  | <0.0001 | 0.0002 |
| DACOSTA UV RESPONSE VIA ERCC3 UP                           | 301                 | 9 (3)                 | 8 (2.7)              | 1 (0.3)                | <0.0001 | 0.0002 |
| FARMER BREAST CANCER APOCRINE VS BASAL                     | 314                 | 9 (2.9)               | 9 (2.9)              | 0 (0)                  | <0.0001 | 0.0002 |
| FRASOR RESPONSE TO SERM OR FULVESTRANT DN                  | 50                  | 9 (18)                | 9 (18)               | 0 (0)                  | <0.0001 | 0.0002 |
| GARGALOVIC RESPONSE TO OXIDIZED PHOSPHOLIPIDS TURQUOISE DN | 50                  | 9 (18)                | 9 (18)               | 0 (0)                  | <0.0001 | 0.0002 |
| NAKAMURA TUMOR ZONE PERIPHERAL VS CENTRAL UP               | 277                 | 9 (3.2)               | 9 (3.2)              | 0 (0)                  | <0.0001 | 0.0002 |
| YAMAZAKI TCEB3 TARGETS DN                                  | 214                 | 9 (4.2)               | 8 (3.7)              | 1 (0.5)                | <0.0001 | 0.0002 |
| EGUCHI CELL CYCLE RB1 TARGETS                              | 23                  | 8 (34.8)              | 8 (34.8)             | 0 (0)                  | <0.0001 | 0.0002 |
| GARY CD5 TARGETS DN                                        | 416                 | 8 (1.9)               | 8 (1.9)              | 0 (0)                  | <0.0001 | 0.0002 |
| GRADE COLON AND RECTAL CANCER UP                           | 279                 | 8 (2.9)               | 8 (2.9)              | 0 (0)                  | <0.0001 | 0.0002 |
| GREENBAUM E2A TARGETS UP                                   | 30                  | 8 (26.7)              | 8 (26.7)             | 0 (0)                  | <0.0001 | 0.0002 |
| GROSS HYPOXIA VIA ELK3 UP                                  | 206                 | 8 (3.9)               | 8 (3.9)              | 0 (0)                  | <0.0001 | 0.0002 |
| HELLER HDAC TARGETS UP                                     | 318                 | 8 (2.5)               | 7 (2.2)              | 1 (0.3)                | <0.0001 | 0.0002 |
| MOHANKUMAR TLX1 TARGETS UP                                 | 418                 | 8 (1.9)               | 8 (1.9)              | 0 (0)                  | <0.0001 | 0.0002 |
| PYEON CANCER HEAD AND NECK VS CERVICAL UP                  | 165                 | 8 (4.8)               | 8 (4.8)              | 0 (0)                  | <0.0001 | 0.0002 |
| RIGGI EWING SARCOMA PROGENITOR DN                          | 185                 | 8 (4.3)               | 8 (4.3)              | 0 (0)                  | <0.0001 | 0.0002 |
| SONG TARGETS OF IE86 CMV PROTEIN                           | 60                  | 8 (13.3)              | 8 (13.3)             | 0 (0)                  | <0.0001 | 0.0002 |
| VERNELL RETINOBLASTOMA PATHWAY UP                          | 69                  | 8 (11.6)              | 8 (11.6)             | 0 (0)                  | <0.0001 | 0.0002 |
| BOHN PRIMARY IMMUNODEFICIENCY SYNDROM UP                   | 47                  | 7 (14.9)              | 7 (14.9)             | 0 (0)                  | <0.0001 | 0.0002 |
| BOYALT LIVER CANCER SUBCLASS G3 UP                         | 185                 | 7 (3.8)               | 7 (3.8)              | 0 (0)                  | <0.0001 | 0.0002 |
| DOANE RESPONSE TO ANDROGEN DN                              | 232                 | 7 (3)                 | 7 (3)                | 0 (0)                  | <0.0001 | 0.0002 |

| Category Name                                           | Category<br>Genes # | Any-reg.<br>SDEG #(%) | Up-reg.<br>SDEG #(%) | Down-reg.<br>SDEG #(%) | P       | FDR    |
|---------------------------------------------------------|---------------------|-----------------------|----------------------|------------------------|---------|--------|
| GEORGES CELL CYCLE MIR192 TARGETS                       | 61                  | 7 (11.5)              | 7 (11.5)             | 0 (0)                  | <0.0001 | 0.0002 |
| LY AGING MIDDLE DN                                      | 16                  | 7 (43.8)              | 7 (43.8)             | 0 (0)                  | <0.0001 | 0.0002 |
| PAL PRMT5 TARGETS UP                                    | 194                 | 7 (3.6)               | 7 (3.6)              | 0 (0)                  | <0.0001 | 0.0002 |
| PETROVA PROX1 TARGETS UP                                | 28                  | 7 (25)                | 6 (21.4)             | 1 (3.6)                | <0.0001 | 0.0002 |
| PUJANA BREAST CANCER LIT INT NETWORK                    | 97                  | 7 (7.2)               | 7 (7.2)              | 0 (0)                  | <0.0001 | 0.0002 |
| REN BOUND BY E2F                                        | 69                  | 7 (10.1)              | 7 (10.1)             | 0 (0)                  | <0.0001 | 0.0002 |
| SMID BREAST CANCER LUMINAL A DN                         | 16                  | 7 (43.8)              | 7 (43.8)             | 0 (0)                  | <0.0001 | 0.0002 |
| WHITFIELD CELL CYCLE G1 S                               | 134                 | 7 (5.2)               | 7 (5.2)              | 0 (0)                  | <0.0001 | 0.0002 |
| AMUNDSON GENOTOXIC SIGNATURE                            | 101                 | 6 (5.9)               | 6 (5.9)              | 0 (0)                  | <0.0001 | 0.0002 |
| BROWNE HCMV INFECTION 2HR DN                            | 50                  | 6 (12)                | 6 (12)               | 0 (0)                  | <0.0001 | 0.0002 |
| FERRANDO HOX11 NEIGHBORS                                | 22                  | 6 (27.3)              | 6 (27.3)             | 0 (0)                  | <0.0001 | 0.0002 |
| KAMMINGA EZH2 TARGETS                                   | 41                  | 6 (14.6)              | 6 (14.6)             | 0 (0)                  | <0.0001 | 0.0002 |
| KOKKINAKIS METHIONINE DEPRIVATION 96HR DN               | 73                  | 6 (8.2)               | 6 (8.2)              | 0 (0)                  | <0.0001 | 0.0002 |
| KUMAMOTO RESPONSE TO NUTLIN 3A DN                       | 10                  | 6 (60)                | 6 (60)               | 0 (0)                  | <0.0001 | 0.0002 |
| LE NEURONAL DIFFERENTIATION DN                          | 18                  | 6 (33.3)              | 6 (33.3)             | 0 (0)                  | <0.0001 | 0.0002 |
| LI WILMS TUMOR ANAPLASTIC UP                            | 19                  | 6 (31.6)              | 6 (31.6)             | 0 (0)                  | <0.0001 | 0.0002 |
| MARKEY RB1 CHRONIC LOF UP                               | 112                 | 6 (5.4)               | 6 (5.4)              | 0 (0)                  | <0.0001 | 0.0002 |
| MONTERO THYROID CANCER POOR SURVIVAL UP                 | 12                  | 6 (50)                | 6 (50)               | 0 (0)                  | <0.0001 | 0.0002 |
| NADERI BREAST CANCER PROGNOSIS UP                       | 47                  | 6 (12.8)              | 6 (12.8)             | 0 (0)                  | <0.0001 | 0.0002 |
| OLSSON E2F3 TARGETS DN                                  | 68                  | 6 (8.8)               | 6 (8.8)              | 0 (0)                  | <0.0001 | 0.0002 |
| PUJANA BREAST CANCER WITH BRCA1 MUTATED UP              | 55                  | 6 (10.9)              | 6 (10.9)             | 0 (0)                  | <0.0001 | 0.0002 |
| SCIAN CELL CYCLE TARGETS OF TP53 AND TP73 DN            | 22                  | 6 (27.3)              | 6 (27.3)             | 0 (0)                  | <0.0001 | 0.0002 |
| SCIBETTA KDM5B TARGETS DN                               | 75                  | 6 (8)                 | 6 (8)                | 0 (0)                  | <0.0001 | 0.0002 |
| TURASHVILI BREAST DUCTAL CARCINOMA VS LOBULAR NORMAL UP | 73                  | 6 (8.2)               | 6 (8.2)              | 0 (0)                  | <0.0001 | 0.0002 |
| WEST ADRENOCORTICAL TUMOR MARKERS UP                    | 21                  | 6 (28.6)              | 6 (28.6)             | 0 (0)                  | <0.0001 | 0.0002 |
| BHATI G2M ARREST BY 2METHOXYESTRADIOL UP                | 128                 | 5 (3.9)               | 5 (3.9)              | 0 (0)                  | <0.0001 | 0.0002 |
| BHATTACHARYA EMBRYONIC STEM CELL                        | 92                  | 5 (5.4)               | 5 (5.4)              | 0 (0)                  | <0.0001 | 0.0002 |
| BOYALT LIVER CANCER SUBCLASS G23 UP                     | 49                  | 5 (10.2)              | 5 (10.2)             | 0 (0)                  | <0.0001 | 0.0002 |
| CHIARADONNA NEOPLASTIC TRANSFORMATION KRAS UP           | 117                 | 5 (4.3)               | 5 (4.3)              | 0 (0)                  | <0.0001 | 0.0002 |
| DANG MYC TARGETS UP                                     | 139                 | 5 (3.6)               | 5 (3.6)              | 0 (0)                  | <0.0001 | 0.0002 |
| DELPUECH FOXO3 TARGETS DN                               | 42                  | 5 (11.9)              | 5 (11.9)             | 0 (0)                  | <0.0001 | 0.0002 |
| HADDAD T LYMPHOCYTE AND NK PROGENITOR DN                | 62                  | 5 (8.1)               | 5 (8.1)              | 0 (0)                  | <0.0001 | 0.0002 |
| HONRADO BREAST CANCER BRCA1 VS BRCA2                    | 19                  | 5 (26.3)              | 5 (26.3)             | 0 (0)                  | <0.0001 | 0.0002 |
| JAEGER METASTASIS UP                                    | 41                  | 5 (12.2)              | 5 (12.2)             | 0 (0)                  | <0.0001 | 0.0002 |
| JOHANSSON GLIOMAGENESIS BY PDGFB UP                     | 57                  | 5 (8.8)               | 5 (8.8)              | 0 (0)                  | <0.0001 | 0.0002 |
| KAN RESPONSE TO ARSENIC TRIOXIDE                        | 114                 | 5 (4.4)               | 5 (4.4)              | 0 (0)                  | <0.0001 | 0.0002 |
| KAUFFMANN MELANOMA RELAPSE UP                           | 61                  | 5 (8.2)               | 5 (8.2)              | 0 (0)                  | <0.0001 | 0.0002 |
| PUIFFE INVASION INHIBITED BY ASCITES UP                 | 80                  | 5 (6.2)               | 5 (6.2)              | 0 (0)                  | <0.0001 | 0.0002 |

| Category Name                                     | Category<br>Genes # | Any-reg.<br>SDEG #(%) | Up-reg.<br>SDEG #(%) | Down-reg.<br>SDEG #(%) | P       | FDR    |
|---------------------------------------------------|---------------------|-----------------------|----------------------|------------------------|---------|--------|
| RIZ ERYTHROID DIFFERENTIATION                     | 72                  | 5 (6.9)               | 5 (6.9)              | 0 (0)                  | <0.0001 | 0.0002 |
| STEIN ESR1 TARGETS                                | 80                  | 5 (6.2)               | 5 (6.2)              | 0 (0)                  | <0.0001 | 0.0002 |
| SU TESTIS                                         | 72                  | 5 (6.9)               | 5 (6.9)              | 0 (0)                  | <0.0001 | 0.0002 |
| YAO TEMPORAL RESPONSE TO PROGESTERONE CLUSTER 15  | 32                  | 5 (15.6)              | 5 (15.6)             | 0 (0)                  | <0.0001 | 0.0002 |
| BENPORATH ES 2                                    | 37                  | 4 (10.8)              | 4 (10.8)             | 0 (0)                  | <0.0001 | 0.0002 |
| CAFFAREL RESPONSE TO THC 24HR 5 DN                | 74                  | 4 (5.4)               | 4 (5.4)              | 0 (0)                  | <0.0001 | 0.0002 |
| CAFFAREL RESPONSE TO THC DN                       | 32                  | 4 (12.5)              | 4 (12.5)             | 0 (0)                  | <0.0001 | 0.0002 |
| FINETTI BREAST CANCER KINOME RED                  | 16                  | 4 (25)                | 4 (25)               | 0 (0)                  | <0.0001 | 0.0002 |
| GENTLES LEUKEMIC STEM CELL DN                     | 18                  | 4 (22.2)              | 4 (22.2)             | 0 (0)                  | <0.0001 | 0.0002 |
| LY AGING PREMATURE DN                             | 30                  | 4 (13.3)              | 4 (13.3)             | 0 (0)                  | <0.0001 | 0.0002 |
| NAKAMURA CANCER MICROENVIRONMENT DN               | 46                  | 4 (8.7)               | 4 (8.7)              | 0 (0)                  | <0.0001 | 0.0002 |
| STEIN ESRRA TARGETS RESPONSIVE TO ESTROGEN DN     | 40                  | 4 (10)                | 4 (10)               | 0 (0)                  | <0.0001 | 0.0002 |
| THILLAINADESAN ZNF217 TARGETS UP                  | 46                  | 4 (8.7)               | 4 (8.7)              | 0 (0)                  | <0.0001 | 0.0002 |
| XU HGF SIGNALING NOT VIA AKT1 48HR DN             | 20                  | 4 (20)                | 4 (20)               | 0 (0)                  | <0.0001 | 0.0002 |
| XU HGF TARGETS INDUCED BY AKT1 48HR DN            | 30                  | 4 (13.3)              | 4 (13.3)             | 0 (0)                  | <0.0001 | 0.0002 |
| ZAMORA NOS2 TARGETS UP                            | 66                  | 4 (6.1)               | 4 (6.1)              | 0 (0)                  | <0.0001 | 0.0002 |
| INAMURA LUNG CANCER SCC UP                        | 14                  | 3 (21.4)              | 3 (21.4)             | 0 (0)                  | <0.0001 | 0.0002 |
| OHASHI AURKB TARGETS                              | 11                  | 3 (27.3)              | 3 (27.3)             | 0 (0)                  | <0.0001 | 0.0002 |
| SIMBULAN PARP1 TARGETS DN                         | 17                  | 3 (17.6)              | 3 (17.6)             | 0 (0)                  | <0.0001 | 0.0002 |
| PILON KLF1 TARGETS DN                             | 1922                | 16 (0.8)              | 16 (0.8)             | 0 (0)                  | <0.0001 | 0.0003 |
| DANG BOUND BY MYC                                 | 1086                | 11 (1)                | 11 (1)               | 0 (0)                  | <0.0001 | 0.0003 |
| NUYTEN NIPP1 TARGETS DN                           | 813                 | 10 (1.2)              | 9 (1.1)              | 1 (0.1)                | <0.0001 | 0.0003 |
| SENESE HDAC3 TARGETS DN                           | 510                 | 9 (1.8)               | 9 (1.8)              | 0 (0)                  | <0.0001 | 0.0003 |
| IVANOVA HEMATOPOIESIS LATE PROGENITOR             | 534                 | 8 (1.5)               | 8 (1.5)              | 0 (0)                  | <0.0001 | 0.0003 |
| MARTINEZ RESPONSE TO TRABECTEDIN DN               | 276                 | 8 (2.9)               | 8 (2.9)              | 0 (0)                  | <0.0001 | 0.0003 |
| ZWANG DOWN BY 2ND EGF PULSE                       | 287                 | 7 (2.4)               | 7 (2.4)              | 0 (0)                  | <0.0001 | 0.0003 |
| DUTERTRE ESTRADIOL RESPONSE 6HR UP                | 220                 | 6 (2.7)               | 6 (2.7)              | 0 (0)                  | <0.0001 | 0.0003 |
| LABBE WNT3A TARGETS UP                            | 107                 | 6 (5.6)               | 6 (5.6)              | 0 (0)                  | <0.0001 | 0.0003 |
| LEE LIVER CANCER SURVIVAL DN                      | 186                 | 6 (3.2)               | 6 (3.2)              | 0 (0)                  | <0.0001 | 0.0003 |
| LINSLEY MIR16 TARGETS                             | 206                 | 6 (2.9)               | 6 (2.9)              | 0 (0)                  | <0.0001 | 0.0003 |
| KAUFFMANN DNA REPLICATION GENES                   | 139                 | 5 (3.6)               | 5 (3.6)              | 0 (0)                  | <0.0001 | 0.0003 |
| MORI MATURE B LYMPHOCYTE DN                       | 72                  | 4 (5.6)               | 4 (5.6)              | 0 (0)                  | <0.0001 | 0.0003 |
| SESTO RESPONSE TO UV C7                           | 67                  | 4 (6)                 | 4 (6)                | 0 (0)                  | <0.0001 | 0.0003 |
| SUNG METASTASIS STROMA DN                         | 53                  | 4 (7.5)               | 4 (7.5)              | 0 (0)                  | <0.0001 | 0.0003 |
| MARKS HDAC TARGETS DN                             | 14                  | 3 (21.4)              | 3 (21.4)             | 0 (0)                  | <0.0001 | 0.0003 |
| SEMBA FHIT TARGETS DN                             | 10                  | 3 (30)                | 3 (30)               | 0 (0)                  | <0.0001 | 0.0003 |
| ACEVEDO FGFR1 TARGETS IN PROSTATE CANCER MODEL UP | 278                 | 6 (2.2)               | 6 (2.2)              | 0 (0)                  | <0.0001 | 0.0004 |
| BORCZUK MALIGNANT MESOTHELIOMA UP                 | 282                 | 6 (2.1)               | 6 (2.1)              | 0 (0)                  | <0.0001 | 0.0004 |

| Category Name                                    | Category<br>Genes # | Any-reg.<br>SDEG #(%) | Up-reg.<br>SDEG #(%) | Down-reg.<br>SDEG #(%) | P       | FDR    |
|--------------------------------------------------|---------------------|-----------------------|----------------------|------------------------|---------|--------|
| KATSANOUE ELAVL1 TARGETS DN                      | 144                 | 5 (3.5)               | 5 (3.5)              | 0 (0)                  | <0.0001 | 0.0004 |
| PYEON HPV POSITIVE TUMORS UP                     | 91                  | 5 (5.5)               | 5 (5.5)              | 0 (0)                  | <0.0001 | 0.0004 |
| MCBRYAN PUBERTAL BREAST 6 7WK DN                 | 77                  | 4 (5.2)               | 4 (5.2)              | 0 (0)                  | <0.0001 | 0.0004 |
| WEIGEL OXIDATIVE STRESS BY HNE AND H2O2          | 36                  | 3 (8.3)               | 3 (8.3)              | 0 (0)                  | <0.0001 | 0.0004 |
| DAZARD RESPONSE TO UV NHEK DN                    | 313                 | 7 (2.2)               | 7 (2.2)              | 0 (0)                  | <0.0001 | 0.0006 |
| SPIELMAN LYMPHOBLAST EUROPEAN VS ASIAN UP        | 464                 | 7 (1.5)               | 7 (1.5)              | 0 (0)                  | <0.0001 | 0.0006 |
| PLASARI TGFB1 TARGETS 10HR DN                    | 233                 | 6 (2.6)               | 6 (2.6)              | 0 (0)                  | <0.0001 | 0.0006 |
| FOURNIER ACINAR DEVELOPMENT LATE DN              | 22                  | 3 (13.6)              | 3 (13.6)             | 0 (0)                  | <0.0001 | 0.0006 |
| BROWNE HCMV INFECTION 30MIN DN                   | 144                 | 5 (3.5)               | 5 (3.5)              | 0 (0)                  | <0.0001 | 0.0007 |
| DAZARD UV RESPONSE CLUSTER G6                    | 149                 | 5 (3.4)               | 5 (3.4)              | 0 (0)                  | <0.0001 | 0.0007 |
| FERRANDO T ALL WITH MLL ENL FUSION DN            | 97                  | 4 (4.1)               | 4 (4.1)              | 0 (0)                  | <0.0001 | 0.0007 |
| KOKKINAKIS METHIONINE DEPRIVATION 48HR DN        | 62                  | 4 (6.5)               | 4 (6.5)              | 0 (0)                  | <0.0001 | 0.0007 |
| HU GENOTOXIC DAMAGE 4HR                          | 36                  | 3 (8.3)               | 3 (8.3)              | 0 (0)                  | <0.0001 | 0.0007 |
| KORKOLA TERATOMA                                 | 40                  | 3 (7.5)               | 3 (7.5)              | 0 (0)                  | <0.0001 | 0.0007 |
| NUNODA RESPONSE TO DASATINIB IMATINIB UP         | 29                  | 3 (10.3)              | 3 (10.3)             | 0 (0)                  | <0.0001 | 0.0007 |
| WANG METASTASIS OF BREAST CANCER ESR1 UP         | 35                  | 3 (8.6)               | 3 (8.6)              | 0 (0)                  | <0.0001 | 0.0007 |
| WILLIAMS ESR1 TARGETS UP                         | 26                  | 3 (11.5)              | 3 (11.5)             | 0 (0)                  | <0.0001 | 0.0007 |
| LOPEZ MBD TARGETS                                | 925                 | 10 (1.1)              | 9 (1)                | 1 (0.1)                | <0.0001 | 0.0008 |
| ACEVEDO LIVER TUMOR VS NORMAL ADJACENT TISSUE UP | 850                 | 9 (1.1)               | 9 (1.1)              | 0 (0)                  | <0.0001 | 0.0008 |
| BENPORATH SOX2 TARGETS                           | 735                 | 9 (1.2)               | 9 (1.2)              | 0 (0)                  | <0.0001 | 0.0008 |
| BOQUEST STEM CELL CULTURED VS FRESH UP           | 409                 | 7 (1.7)               | 6 (1.5)              | 1 (0.2)                | <0.0001 | 0.0008 |
| LASTOWSKA NEUROBLASTOMA COPY NUMBER UP           | 176                 | 5 (2.8)               | 5 (2.8)              | 0 (0)                  | <0.0001 | 0.0008 |
| LI WILMS TUMOR VS FETAL KIDNEY 2 UP              | 30                  | 3 (10)                | 3 (10)               | 0 (0)                  | <0.0001 | 0.0008 |
| MATSUDA NATURAL KILLER DIFFERENTIATION           | 463                 | 7 (1.5)               | 7 (1.5)              | 0 (0)                  | <0.0001 | 0.0009 |
| FARMER BREAST CANCER BASAL VS LULMINAL           | 316                 | 6 (1.9)               | 6 (1.9)              | 0 (0)                  | <0.0001 | 0.0009 |
| SMID BREAST CANCER RELAPSE IN BRAIN UP           | 35                  | 3 (8.6)               | 3 (8.6)              | 0 (0)                  | <0.0001 | 0.0009 |
| YU BAP1 TARGETS                                  | 29                  | 3 (10.3)              | 3 (10.3)             | 0 (0)                  | <0.0001 | 0.0009 |
| SANSOM APC TARGETS REQUIRE MYC                   | 207                 | 5 (2.4)               | 5 (2.4)              | 0 (0)                  | <0.0001 | 0.001  |
| SHETH LIVER CANCER VS TXNIP LOSS PAM1            | 217                 | 5 (2.3)               | 5 (2.3)              | 0 (0)                  | <0.0001 | 0.001  |
| BOSCO TH1 CYTOTOXIC MODULE                       | 114                 | 4 (3.5)               | 4 (3.5)              | 0 (0)                  | <0.0001 | 0.0012 |
| BENPORATH NANOG TARGETS                          | 974                 | 10 (1)                | 10 (1)               | 0 (0)                  | <0.0001 | 0.0013 |
| HERNANDEZ MITOTIC ARREST BY DOCETAXEL 1 DN       | 51                  | 3 (5.9)               | 3 (5.9)              | 0 (0)                  | <0.0001 | 0.0013 |
| CROSBY E2F4 TARGETS                              | 6                   | 2 (33.3)              | 2 (33.3)             | 0 (0)                  | <0.0001 | 0.0013 |
| MORI EMU MYC LYMPHOMA BY ONSET TIME UP           | 107                 | 4 (3.7)               | 4 (3.7)              | 0 (0)                  | 0.0001  | 0.0014 |
| FAELT B CLL WITH VH3 21 UP                       | 41                  | 3 (7.3)               | 3 (7.3)              | 0 (0)                  | 0.0001  | 0.0014 |
| KUNINGER IGF1 VS PDGFB TARGETS DN                | 43                  | 3 (7)                 | 3 (7)                | 0 (0)                  | 0.0001  | 0.0014 |
| GLINSKY CANCER DEATH UP                          | 6                   | 2 (33.3)              | 2 (33.3)             | 0 (0)                  | 0.0001  | 0.0014 |
| BONCI TARGETS OF MIR15A AND MIR16 1              | 93                  | 4 (4.3)               | 4 (4.3)              | 0 (0)                  | 0.0001  | 0.0015 |

| Category Name                                          | Category | Any-reg.   | Up-reg.    | Down-reg.  | P      | FDR    |
|--------------------------------------------------------|----------|------------|------------|------------|--------|--------|
|                                                        | Genes #  | SDEG #(% ) | SDEG #(% ) | SDEG #(% ) |        |        |
| KRASNOSELSKAYA ILF3 TARGETS DN                         | 43       | 3 (7)      | 3 (7)      | 0 (0)      | 0.0001 | 0.0015 |
| SMITH LIVER CANCER                                     | 43       | 3 (7)      | 3 (7)      | 0 (0)      | 0.0001 | 0.0016 |
| GRAHAM CML QUIESCENT VS CML DIVIDING DN                | 11       | 2 (18.2)   | 2 (18.2)   | 0 (0)      | 0.0001 | 0.0016 |
| LIANG SILENCED BY METHYLATION DN                       | 10       | 2 (20)     | 2 (20)     | 0 (0)      | 0.0001 | 0.0016 |
| REICHERT G1S REGULATORS AS PI3K TARGETS                | 8        | 2 (25)     | 2 (25)     | 0 (0)      | 0.0001 | 0.0016 |
| BURTON ADIPOGENESIS PEAK AT 16HR                       | 38       | 3 (7.9)    | 3 (7.9)    | 0 (0)      | 0.0001 | 0.0017 |
| WONG PROTEASOME GENE MODULE                            | 48       | 3 (6.2)    | 3 (6.2)    | 0 (0)      | 0.0001 | 0.0017 |
| KIM WT1 TARGETS 8HR DN                                 | 123      | 4 (3.3)    | 3 (2.4)    | 1 (0.8)    | 0.0001 | 0.0018 |
| LEE LIVER CANCER MYC UP                                | 53       | 3 (5.7)    | 3 (5.7)    | 0 (0)      | 0.0001 | 0.0018 |
| JIANG VHL TARGETS                                      | 135      | 4 (3)      | 4 (3)      | 0 (0)      | 0.0002 | 0.0023 |
| KRIEG HYPOXIA VIA KDM3A                                | 51       | 3 (5.9)    | 3 (5.9)    | 0 (0)      | 0.0002 | 0.0023 |
| TURASHVILI BREAST DUCTAL CARCINOMA VS DUCTAL NORMAL UP | 41       | 3 (7.3)    | 3 (7.3)    | 0 (0)      | 0.0002 | 0.0023 |
| ACEVEDO LIVER CANCER UP                                | 947      | 9 (1)      | 9 (1)      | 0 (0)      | 0.0002 | 0.0024 |
| GRUETZMANN PANCREATIC CANCER UP                        | 351      | 6 (1.7)    | 6 (1.7)    | 0 (0)      | 0.0002 | 0.0024 |
| PRAMOONJAGO SOX4 TARGETS DN                            | 51       | 3 (5.9)    | 3 (5.9)    | 0 (0)      | 0.0002 | 0.0024 |
| KONG E2F1 TARGETS                                      | 10       | 2 (20)     | 2 (20)     | 0 (0)      | 0.0002 | 0.0025 |
| KALMA E2F1 TARGETS                                     | 11       | 2 (18.2)   | 2 (18.2)   | 0 (0)      | 0.0002 | 0.0026 |
| ZHU SKIL TARGETS DN                                    | 9        | 2 (22.2)   | 2 (22.2)   | 0 (0)      | 0.0002 | 0.0026 |
| GRAESSMANN APOPTOSIS BY DOXORUBICIN DN                 | 1714     | 13 (0.8)   | 13 (0.8)   | 0 (0)      | 0.0002 | 0.0027 |
| LEE LIVER CANCER MYC E2F1 UP                           | 56       | 3 (5.4)    | 3 (5.4)    | 0 (0)      | 0.0002 | 0.0027 |
| KOKKINAKIS METHIONINE DEPRIVATION 48HR UP              | 126      | 4 (3.2)    | 4 (3.2)    | 0 (0)      | 0.0002 | 0.0028 |
| LOPEZ MESOTELIOMA SURVIVAL TIME UP                     | 12       | 2 (16.7)   | 2 (16.7)   | 0 (0)      | 0.0002 | 0.0028 |
| RHODES CANCER META SIGNATURE                           | 61       | 3 (4.9)    | 3 (4.9)    | 0 (0)      | 0.0003 | 0.0031 |
| BILD E2F3 ONCOGENIC SIGNATURE                          | 236      | 5 (2.1)    | 4 (1.7)    | 1 (0.4)    | 0.0003 | 0.0033 |
| CHIANG LIVER CANCER SUBCLASS UNANNOTATED DN            | 177      | 4 (2.3)    | 4 (2.3)    | 0 (0)      | 0.0003 | 0.0034 |
| BORLAK LIVER CANCER EGF UP                             | 55       | 3 (5.5)    | 3 (5.5)    | 0 (0)      | 0.0003 | 0.0034 |
| CUI GLUCOSE DEPRIVATION                                | 70       | 3 (4.3)    | 3 (4.3)    | 0 (0)      | 0.0003 | 0.0034 |
| NEBEN AML WITH FLT3 OR NRAS DN                         | 12       | 2 (16.7)   | 2 (16.7)   | 0 (0)      | 0.0003 | 0.0038 |
| PEART HDAC PROLIFERATION CLUSTER UP                    | 56       | 3 (5.4)    | 3 (5.4)    | 0 (0)      | 0.0004 | 0.0042 |
| WU APOPTOSIS BY CDKN1A NOT VIA TP53                    | 12       | 2 (16.7)   | 2 (16.7)   | 0 (0)      | 0.0004 | 0.0045 |
| ONKEN UVEAL MELANOMA UP                                | 763      | 8 (1)      | 8 (1)      | 0 (0)      | 0.0005 | 0.0051 |
| PENG GLUCOSE DEPRIVATION DN                            | 162      | 4 (2.5)    | 4 (2.5)    | 0 (0)      | 0.0005 | 0.0053 |
| CAIRO HEPATOBLASTOMA POOR SURVIVAL                     | 14       | 2 (14.3)   | 2 (14.3)   | 0 (0)      | 0.0005 | 0.0057 |
| DANG REGULATED BY MYC UP                               | 72       | 3 (4.2)    | 3 (4.2)    | 0 (0)      | 0.0005 | 0.006  |
| SCHWAB TARGETS OF BMYB POLYMORPHIC VARIANTS UP         | 12       | 2 (16.7)   | 2 (16.7)   | 0 (0)      | 0.0005 | 0.0061 |
| FERNANDEZ BOUND BY MYC                                 | 174      | 4 (2.3)    | 4 (2.3)    | 0 (0)      | 0.0006 | 0.0061 |
| KOINUMA COLON CANCER MSI DN                            | 16       | 2 (12.5)   | 2 (12.5)   | 0 (0)      | 0.0006 | 0.0061 |
| BAKER HEMATOPOIESIS STAT3 TARGETS                      | 15       | 2 (13.3)   | 2 (13.3)   | 0 (0)      | 0.0006 | 0.0067 |

-S25-

Appendix "Cellular response to AS03-H5N1 vaccine"

Howard, Hoek, Goll et al.

| Category Name                           | Category<br>Genes # | Any-reg.<br>SDEG #(%) | Up-reg.<br>SDEG #(%) | Down-reg.<br>SDEG #(%) | P      | FDR    |
|-----------------------------------------|---------------------|-----------------------|----------------------|------------------------|--------|--------|
| CHUANG OXIDATIVE STRESS RESPONSE DN     | 24                  | 2 (8.3)               | 2 (8.3)              | 0 (0)                  | 0.0006 | 0.0068 |
| KARAKAS TGFB1 SIGNALING                 | 18                  | 2 (11.1)              | 2 (11.1)             | 0 (0)                  | 0.0007 | 0.0073 |
| SHEN SMARCA2 TARGETS DN                 | 329                 | 5 (1.5)               | 5 (1.5)              | 0 (0)                  | 0.0007 | 0.0074 |
| SLEBOS HEAD AND NECK CANCER WITH HPV UP | 79                  | 3 (3.8)               | 3 (3.8)              | 0 (0)                  | 0.0007 | 0.0077 |
| CHICAS RB1 TARGETS LOW SERUM            | 106                 | 3 (2.8)               | 3 (2.8)              | 0 (0)                  | 0.0007 | 0.0078 |
| CAFFAREL RESPONSE TO THC 24HR 3 DN      | 26                  | 2 (7.7)               | 2 (7.7)              | 0 (0)                  | 0.0008 | 0.0084 |
| WELCSH BRCA1 TARGETS UP                 | 193                 | 4 (2.1)               | 4 (2.1)              | 0 (0)                  | 0.0008 | 0.0084 |
| WANG CISPLATIN RESPONSE AND XPC UP      | 189                 | 4 (2.1)               | 4 (2.1)              | 0 (0)                  | 0.0008 | 0.0086 |
| MEINHOLD OVARIAN CANCER LOW GRADE DN    | 20                  | 2 (10)                | 2 (10)               | 0 (0)                  | 0.0008 | 0.0086 |
| CHEOK RESPONSE TO MERCAPTOPYRINE DN     | 20                  | 2 (10)                | 2 (10)               | 0 (0)                  | 0.0008 | 0.0089 |
| WIELAND UP BY HBV INFECTION             | 100                 | 3 (3)                 | 3 (3)                | 0 (0)                  | 0.0009 | 0.0091 |
| JEON SMAD6 TARGETS DN                   | 19                  | 2 (10.5)              | 2 (10.5)             | 0 (0)                  | 0.0009 | 0.0092 |
| BENPORATH NOS TARGETS                   | 178                 | 4 (2.2)               | 4 (2.2)              | 0 (0)                  | 0.0009 | 0.0092 |
| WANG LSD1 TARGETS UP                    | 23                  | 2 (8.7)               | 1 (4.3)              | 1 (4.3)                | 0.0009 | 0.0097 |

**Table A103:** Significantly enriched MSigDB Chemical/Genetic Perturbation Sets (RNA-Seq, NK-cells, Day 3). Results sorted by FDR and #SDEG genes.

| Category Name                                | Category<br>Genes # | Any-reg.<br>SDEG #(%) | Up-reg.<br>SDEG #(%) | Down-reg.<br>SDEG #(%) | P       | FDR    |
|----------------------------------------------|---------------------|-----------------------|----------------------|------------------------|---------|--------|
| Tuberculosis                                 | 159                 | 10 (6.3)              | 0 (0)                | 10 (6.3)               | <0.0001 | 0.0002 |
| Antigen processing and presentation          | 64                  | 7 (10.9)              | 0 (0)                | 7 (10.9)               | <0.0001 | 0.0002 |
| Toxoplasmosis                                | 101                 | 7 (6.9)               | 0 (0)                | 7 (6.9)                | <0.0001 | 0.0002 |
| Influenza A                                  | 149                 | 7 (4.7)               | 0 (0)                | 7 (4.7)                | <0.0001 | 0.0002 |
| Inflammatory bowel disease (IBD)             | 53                  | 7 (13.2)              | 0 (0)                | 7 (13.2)               | <0.0001 | 0.0002 |
| Phagosome                                    | 131                 | 6 (4.6)               | 0 (0)                | 6 (4.6)                | <0.0001 | 0.0002 |
| Cell adhesion molecules (CAMs)               | 123                 | 6 (4.9)               | 0 (0)                | 6 (4.9)                | <0.0001 | 0.0002 |
| Leishmaniasis                                | 60                  | 6 (10)                | 0 (0)                | 6 (10)                 | <0.0001 | 0.0002 |
| Herpes simplex infection                     | 154                 | 6 (3.9)               | 0 (0)                | 6 (3.9)                | <0.0001 | 0.0002 |
| Asthma                                       | 23                  | 6 (26.1)              | 0 (0)                | 6 (26.1)               | <0.0001 | 0.0002 |
| Rheumatoid arthritis                         | 77                  | 6 (7.8)               | 0 (0)                | 6 (7.8)                | <0.0001 | 0.0002 |
| Intestinal immune network for IgA production | 37                  | 5 (13.5)              | 0 (0)                | 5 (13.5)               | <0.0001 | 0.0002 |
| Type I diabetes mellitus                     | 37                  | 5 (13.5)              | 0 (0)                | 5 (13.5)               | <0.0001 | 0.0002 |
| Staphylococcus aureus infection              | 47                  | 5 (10.6)              | 0 (0)                | 5 (10.6)               | <0.0001 | 0.0002 |
| Autoimmune thyroid disease                   | 45                  | 5 (11.1)              | 0 (0)                | 5 (11.1)               | <0.0001 | 0.0002 |
| Allograft rejection                          | 31                  | 5 (16.1)              | 0 (0)                | 5 (16.1)               | <0.0001 | 0.0002 |
| Graft-versus-host disease                    | 33                  | 5 (15.2)              | 0 (0)                | 5 (15.2)               | <0.0001 | 0.0002 |
| Viral myocarditis                            | 51                  | 5 (9.8)               | 0 (0)                | 5 (9.8)                | <0.0001 | 0.0002 |
| Systemic lupus erythematosus                 | 106                 | 5 (4.7)               | 0 (0)                | 5 (4.7)                | <0.0001 | 0.0003 |

| Category Name                                      | Category<br>Genes # | Any-reg.<br>SDEG #(%) | Up-reg.<br>SDEG #(%) | Down-reg.<br>SDEG #(%) | P       | FDR    |
|----------------------------------------------------|---------------------|-----------------------|----------------------|------------------------|---------|--------|
| Hematopoietic cell lineage                         | 74                  | 4 (5.4)               | 0 (0)                | 4 (5.4)                | <0.0001 | 0.0003 |
| HTLV-I infection                                   | 229                 | 5 (2.2)               | 0 (0)                | 5 (2.2)                | 0.0001  | 0.0016 |
| Epstein-Barr virus infection                       | 176                 | 4 (2.3)               | 0 (0)                | 4 (2.3)                | 0.0004  | 0.0051 |
| Arrhythmic right ventricular cardiomyopathy (ARVC) | 64                  | 3 (4.7)               | 0 (0)                | 3 (4.7)                | 0.0004  | 0.0051 |

**Table A104:** Significantly enriched KEGG Pathways (RNA-Seq, NK-cells, Day 28). Results sorted by FDR and #SDEG genes.

| Category Name       | Category<br>Genes # | Any-reg.<br>SDEG #(%) | Up-reg.<br>SDEG #(%) | Down-reg.<br>SDEG #(%) | P       | FDR    |
|---------------------|---------------------|-----------------------|----------------------|------------------------|---------|--------|
| SIGNAL TRANSDUCTION | 1580                | 12 (0.8)              | 0 (0)                | 12 (0.8)               | <0.0001 | 0.0082 |

**Table A105:** Significantly enriched MSigDB GO Biological Processes (RNA-Seq, NK-cells, Day 28). Results sorted by FDR and #SDEG genes.

| Category Name                | Category<br>Genes # | Any-reg.<br>SDEG #(%) | Up-reg.<br>SDEG #(%) | Down-reg.<br>SDEG #(%) | P       | FDR    |
|------------------------------|---------------------|-----------------------|----------------------|------------------------|---------|--------|
| MEMBRANE                     | 1902                | 16 (0.8)              | 0 (0)                | 16 (0.8)               | <0.0001 | 0.0012 |
| PLASMA MEMBRANE              | 1358                | 14 (1)                | 0 (0)                | 14 (1)                 | <0.0001 | 0.0012 |
| INTEGRAL TO MEMBRANE         | 1272                | 11 (0.9)              | 0 (0)                | 11 (0.9)               | <0.0001 | 0.0023 |
| INTRINSIC TO MEMBRANE        | 1289                | 11 (0.9)              | 0 (0)                | 11 (0.9)               | <0.0001 | 0.0023 |
| INTEGRAL TO PLASMA MEMBRANE  | 930                 | 9 (1)                 | 0 (0)                | 9 (1)                  | 0.0001  | 0.0062 |
| INTRINSIC TO PLASMA MEMBRANE | 943                 | 9 (1)                 | 0 (0)                | 9 (1)                  | 0.0002  | 0.0062 |
| MEMBRANE PART                | 1597                | 11 (0.7)              | 0 (0)                | 11 (0.7)               | 0.0002  | 0.0073 |

**Table A106:** Significantly enriched MSigDB GO Cellular Components (RNA-Seq, NK-cells, Day 28). Results sorted by FDR and #SDEG genes.

| Category Name     | Category<br>Genes # | Any-reg.<br>SDEG #(%) | Up-reg.<br>SDEG #(%) | Down-reg.<br>SDEG #(%) | P       | FDR   |
|-------------------|---------------------|-----------------------|----------------------|------------------------|---------|-------|
| RECEPTOR ACTIVITY | 554                 | 8 (1.4)               | 0 (0)                | 8 (1.4)                | <0.0001 | 0.004 |

**Table A107:** Significantly enriched MSigDB GO Molecular Functions (RNA-Seq, NK-cells, Day 28). Results sorted by FDR and #SDEG genes.

| Category Name           | Category<br>Genes # | Any-reg.<br>SDEG #(%) | Up-reg.<br>SDEG #(%) | Down-reg.<br>SDEG #(%) | P       | FDR    |
|-------------------------|---------------------|-----------------------|----------------------|------------------------|---------|--------|
| BIOCARTA TH1TH2 PATHWAY | 18                  | 3 (16.7)              | 0 (0)                | 3 (16.7)               | <0.0001 | 0.0022 |
| BIOCARTA IL5 PATHWAY    | 10                  | 2 (20)                | 0 (0)                | 2 (20)                 | <0.0001 | 0.0081 |

| Category Name            | Category | Any-reg.   | Up-reg.    | Down-reg.  | P      | FDR    |
|--------------------------|----------|------------|------------|------------|--------|--------|
|                          | Genes #  | SDEG #(% ) | SDEG #(% ) | SDEG #(% ) |        |        |
| BIOCARTA ASBCELL PATHWAY | 11       | 2 (18.2)   | 0 (0)      | 2 (18.2)   | 0.0001 | 0.0081 |
| BIOCARTA TCRA PATHWAY    | 11       | 2 (18.2)   | 0 (0)      | 2 (18.2)   | 0.0001 | 0.0081 |

**Table A108:** Significantly enriched MSigDB BioCarta Pathways (RNA-Seq, NK-cells, Day 28). Results sorted by FDR and #SDEG genes.

| Category Name                                      | Category | Any-reg.   | Up-reg.    | Down-reg.  | P       | FDR   |
|----------------------------------------------------|----------|------------|------------|------------|---------|-------|
|                                                    | Genes #  | SDEG #(% ) | SDEG #(% ) | SDEG #(% ) |         |       |
| CHEN METABOLIC SYNDROM NETWORK                     | 1172     | 17 (1.5)   | 0 (0)      | 17 (1.5)   | <0.0001 | 0.001 |
| RODWELL AGING KIDNEY UP                            | 465      | 14 (3)     | 0 (0)      | 14 (3)     | <0.0001 | 0.001 |
| HELLER SILENCED BY METHYLATION UP                  | 273      | 10 (3.7)   | 0 (0)      | 10 (3.7)   | <0.0001 | 0.001 |
| RUTELLA RESPONSE TO CSF2RB AND IL4 DN              | 303      | 10 (3.3)   | 0 (0)      | 10 (3.3)   | <0.0001 | 0.001 |
| WANG RESPONSE TO GSK3 INHIBITOR SB216763 UP        | 378      | 10 (2.6)   | 0 (0)      | 10 (2.6)   | <0.0001 | 0.001 |
| RUTELLA RESPONSE TO HGF VS CSF2RB AND IL4 UP       | 391      | 9 (2.3)    | 0 (0)      | 9 (2.3)    | <0.0001 | 0.001 |
| SCHUETZ BREAST CANCER DUCTAL INVASIVE UP           | 338      | 9 (2.7)    | 0 (0)      | 9 (2.7)    | <0.0001 | 0.001 |
| CHARAFE BREAST CANCER LUMINAL VS MESENCHYMAL DN    | 447      | 8 (1.8)    | 0 (0)      | 8 (1.8)    | <0.0001 | 0.001 |
| HELLER HDAC TARGETS SILENCED BY METHYLATION UP     | 439      | 8 (1.8)    | 0 (0)      | 8 (1.8)    | <0.0001 | 0.001 |
| JOHNSTONE PARVB TARGETS 3 UP                       | 425      | 8 (1.9)    | 0 (0)      | 8 (1.9)    | <0.0001 | 0.001 |
| SMID BREAST CANCER NORMAL LIKE UP                  | 443      | 8 (1.8)    | 0 (0)      | 8 (1.8)    | <0.0001 | 0.001 |
| LI INDUCED T TO NATURAL KILLER UP                  | 302      | 7 (2.3)    | 0 (0)      | 7 (2.3)    | <0.0001 | 0.001 |
| MCLACHLAN DENTAL CARIES DN                         | 219      | 7 (3.2)    | 0 (0)      | 7 (3.2)    | <0.0001 | 0.001 |
| MCLACHLAN DENTAL CARIES UP                         | 227      | 7 (3.1)    | 0 (0)      | 7 (3.1)    | <0.0001 | 0.001 |
| RUTELLA RESPONSE TO HGF DN                         | 224      | 7 (3.1)    | 0 (0)      | 7 (3.1)    | <0.0001 | 0.001 |
| SWEET LUNG CANCER KRAS UP                          | 482      | 7 (1.5)    | 0 (0)      | 7 (1.5)    | <0.0001 | 0.001 |
| YAGI AML WITH T 8 21 TRANSLOCATION                 | 349      | 7 (2)      | 0 (0)      | 7 (2)      | <0.0001 | 0.001 |
| BEIER GLIOMA STEM CELL DN                          | 63       | 6 (9.5)    | 0 (0)      | 6 (9.5)    | <0.0001 | 0.001 |
| BROWN MYELOID CELL DEVELOPMENT UP                  | 159      | 6 (3.8)    | 0 (0)      | 6 (3.8)    | <0.0001 | 0.001 |
| DIAZ CHRONIC MEYLOGENOUS LEUKEMIA DN               | 112      | 6 (5.4)    | 0 (0)      | 6 (5.4)    | <0.0001 | 0.001 |
| GAL LEUKEMIC STEM CELL DN                          | 244      | 6 (2.5)    | 0 (0)      | 6 (2.5)    | <0.0001 | 0.001 |
| WIELAND UP BY HBV INFECTION                        | 100      | 6 (6)      | 0 (0)      | 6 (6)      | <0.0001 | 0.001 |
| GAURNIER PSMD4 TARGETS                             | 68       | 5 (7.4)    | 0 (0)      | 5 (7.4)    | <0.0001 | 0.001 |
| HOFFMANN SMALL PRE BII TO IMMATURE B LYMPHOCYTE UP | 70       | 5 (7.1)    | 0 (0)      | 5 (7.1)    | <0.0001 | 0.001 |
| ICHIBA GRAFT VERSUS HOST DISEASE D7 UP             | 105      | 5 (4.8)    | 0 (0)      | 5 (4.8)    | <0.0001 | 0.001 |
| NAKAYAMA SOFT TISSUE TUMORS PCA1 UP                | 69       | 5 (7.2)    | 0 (0)      | 5 (7.2)    | <0.0001 | 0.001 |
| GRAHAM CML QUIESCENT VS NORMAL QUIESCENT DN        | 45       | 4 (8.9)    | 0 (0)      | 4 (8.9)    | <0.0001 | 0.001 |
| KIM GLIS2 TARGETS UP                               | 84       | 4 (4.8)    | 0 (0)      | 4 (4.8)    | <0.0001 | 0.001 |
| LIAN LIPA TARGETS 6M                               | 70       | 4 (5.7)    | 0 (0)      | 4 (5.7)    | <0.0001 | 0.001 |
| MORI IMMATURE B LYMPHOCYTE UP                      | 52       | 4 (7.7)    | 0 (0)      | 4 (7.7)    | <0.0001 | 0.001 |
| SANA RESPONSE TO IFNG UP                           | 74       | 4 (5.4)    | 0 (0)      | 4 (5.4)    | <0.0001 | 0.001 |



| Category Name                                    | Category<br>Genes # | Any-reg.<br>SDEG #(%) | Up-reg.<br>SDEG #(%) | Down-reg.<br>SDEG #(%) | P       | FDR    |
|--------------------------------------------------|---------------------|-----------------------|----------------------|------------------------|---------|--------|
| YU MYC TARGETS DN                                | 51                  | 4 (7.8)               | 0 (0)                | 4 (7.8)                | <0.0001 | 0.001  |
| LUI THYROID CANCER CLUSTER 4                     | 13                  | 3 (23.1)              | 0 (0)                | 3 (23.1)               | <0.0001 | 0.001  |
| VERHAAK AML WITH NPM1 MUTATED DN                 | 238                 | 6 (2.5)               | 0 (0)                | 6 (2.5)                | <0.0001 | 0.0017 |
| ZHANG TLX TARGETS 60HR UP                        | 289                 | 6 (2.1)               | 0 (0)                | 6 (2.1)                | <0.0001 | 0.0017 |
| ALCALAY AML BY NPM1 LOCALIZATION DN              | 178                 | 5 (2.8)               | 0 (0)                | 5 (2.8)                | <0.0001 | 0.0017 |
| YAGI AML FAB MARKERS                             | 178                 | 5 (2.8)               | 0 (0)                | 5 (2.8)                | <0.0001 | 0.0017 |
| BURTON ADIPOGENESIS 9                            | 88                  | 4 (4.5)               | 0 (0)                | 4 (4.5)                | <0.0001 | 0.0017 |
| ICHIBA GRAFT VERSUS HOST DISEASE 35D UP          | 126                 | 4 (3.2)               | 0 (0)                | 4 (3.2)                | <0.0001 | 0.0017 |
| MORI MATURE B LYMPHOCYTE UP                      | 89                  | 4 (4.5)               | 0 (0)                | 4 (4.5)                | <0.0001 | 0.0017 |
| FULCHER INFLAMMATORY RESPONSE LECTIN VS LPS DN   | 462                 | 7 (1.5)               | 0 (0)                | 7 (1.5)                | <0.0001 | 0.0032 |
| VALK AML CLUSTER 5                               | 30                  | 3 (10)                | 0 (0)                | 3 (10)                 | <0.0001 | 0.0032 |
| KOINUMA TARGETS OF SMAD2 OR SMAD3                | 831                 | 9 (1.1)               | 0 (0)                | 9 (1.1)                | <0.0001 | 0.0035 |
| GOLDRATH ANTIGEN RESPONSE                        | 333                 | 6 (1.8)               | 0 (0)                | 6 (1.8)                | <0.0001 | 0.0035 |
| HELLER HDAC TARGETS UP                           | 318                 | 6 (1.9)               | 0 (0)                | 6 (1.9)                | <0.0001 | 0.0035 |
| HOSHIDA LIVER CANCER SUBCLASS S1                 | 225                 | 5 (2.2)               | 0 (0)                | 5 (2.2)                | <0.0001 | 0.0035 |
| LENAOUR DENDRITIC CELL MATURATION UP             | 112                 | 4 (3.6)               | 0 (0)                | 4 (3.6)                | <0.0001 | 0.0035 |
| TARTE PLASMA CELL VS B LYMPHOCYTE DN             | 36                  | 3 (8.3)               | 0 (0)                | 3 (8.3)                | <0.0001 | 0.0035 |
| WINNEPENNINCKX MELANOMA METASTASIS DN            | 43                  | 3 (7)                 | 0 (0)                | 3 (7)                  | <0.0001 | 0.0035 |
| LEE BMP2 TARGETS UP                              | 723                 | 8 (1.1)               | 0 (0)                | 8 (1.1)                | <0.0001 | 0.0037 |
| CHYLA CBFA2T3 TARGETS UP                         | 372                 | 6 (1.6)               | 0 (0)                | 6 (1.6)                | <0.0001 | 0.0037 |
| GRAHAM CML DIVIDING VS NORMAL QUIESCENT DN       | 88                  | 4 (4.5)               | 0 (0)                | 4 (4.5)                | <0.0001 | 0.0037 |
| CASORELLI APL SECONDARY VS DE NOVO UP            | 39                  | 3 (7.7)               | 0 (0)                | 3 (7.7)                | <0.0001 | 0.0037 |
| ROSS AML WITH CBFβ MYH11 FUSION                  | 48                  | 3 (6.2)               | 0 (0)                | 3 (6.2)                | <0.0001 | 0.0037 |
| ZHAN V1 LATE DIFFERENTIATION GENES UP            | 32                  | 3 (9.4)               | 0 (0)                | 3 (9.4)                | <0.0001 | 0.0037 |
| REN ALVEOLAR RHABDOMYOSARCOMA DN                 | 378                 | 6 (1.6)               | 0 (0)                | 6 (1.6)                | <0.0001 | 0.0042 |
| JAATINEN HEMATOPOIETIC STEM CELL DN              | 221                 | 5 (2.3)               | 0 (0)                | 5 (2.3)                | <0.0001 | 0.0042 |
| IVANOVA HEMATOPOIESIS LATE PROGENITOR            | 534                 | 7 (1.3)               | 0 (0)                | 7 (1.3)                | <0.0001 | 0.0046 |
| GAZDA DIAMOND BLACKFAN ANEMIA PROGENITOR UP      | 40                  | 3 (7.5)               | 0 (0)                | 3 (7.5)                | <0.0001 | 0.0046 |
| BOQUEST STEM CELL DN                             | 213                 | 5 (2.3)               | 0 (0)                | 5 (2.3)                | <0.0001 | 0.0049 |
| BOYLAN MULTIPLE MYELOMA C D DN                   | 244                 | 5 (2)                 | 0 (0)                | 5 (2)                  | <0.0001 | 0.0049 |
| CHANG CORE SERUM RESPONSE DN                     | 205                 | 5 (2.4)               | 0 (0)                | 5 (2.4)                | <0.0001 | 0.0049 |
| BROWN MYELOID CELL DEVELOPMENT DN                | 126                 | 4 (3.2)               | 0 (0)                | 4 (3.2)                | <0.0001 | 0.0049 |
| SMIRNOV CIRCULATING ENDOTHELIOCYTES IN CANCER UP | 152                 | 4 (2.6)               | 0 (0)                | 4 (2.6)                | 0.0001  | 0.0058 |
| ONKEN UVEAL MELANOMA UP                          | 763                 | 8 (1)                 | 0 (0)                | 8 (1)                  | 0.0001  | 0.0062 |
| FULCHER INFLAMMATORY RESPONSE LECTIN VS LPS UP   | 564                 | 7 (1.2)               | 0 (0)                | 7 (1.2)                | 0.0001  | 0.0062 |
| KLEIN PRIMARY EFFUSION LYMPHOMA DN               | 54                  | 3 (5.6)               | 0 (0)                | 3 (5.6)                | 0.0001  | 0.0064 |
| LIAN LIPA TARGETS 3M                             | 56                  | 3 (5.4)               | 0 (0)                | 3 (5.4)                | 0.0001  | 0.0064 |
| BUDHU LIVER CANCER METASTASIS UP                 | 10                  | 2 (20)                | 0 (0)                | 2 (20)                 | 0.0001  | 0.0064 |

| Category Name                                        | Category<br>Genes # | Any-reg.<br>SDEG #(%) | Up-reg.<br>SDEG #(%) | Down-reg.<br>SDEG #(%) | P      | FDR    |
|------------------------------------------------------|---------------------|-----------------------|----------------------|------------------------|--------|--------|
| MORI LARGE PRE BII LYMPHOCYTE DN                     | 56                  | 3 (5.4)               | 0 (0)                | 3 (5.4)                | 0.0001 | 0.0067 |
| WUNDER INFLAMMATORY RESPONSE AND CHOLESTEROL UP      | 61                  | 3 (4.9)               | 0 (0)                | 3 (4.9)                | 0.0001 | 0.0067 |
| TONKS TARGETS OF RUNX1 RUNX1T1 FUSION ERYTHROCYTE UP | 151                 | 4 (2.6)               | 0 (0)                | 4 (2.6)                | 0.0001 | 0.0071 |
| JISON SICKLE CELL DISEASE UP                         | 174                 | 4 (2.3)               | 0 (0)                | 4 (2.3)                | 0.0002 | 0.0092 |
| ZHONG SECRETOME OF LUNG CANCER AND MACROPHAGE        | 75                  | 3 (4)                 | 0 (0)                | 3 (4)                  | 0.0002 | 0.0092 |
| DURAND STROMA MAX UP                                 | 270                 | 5 (1.9)               | 0 (0)                | 5 (1.9)                | 0.0002 | 0.0095 |
| VERHAAK AML WITH NPM1 MUTATED UP                     | 190                 | 4 (2.1)               | 0 (0)                | 4 (2.1)                | 0.0002 | 0.0095 |
| FURUKAWA DUSP6 TARGETS PCI35 UP                      | 73                  | 3 (4.1)               | 0 (0)                | 3 (4.1)                | 0.0002 | 0.0095 |
| LINDSTEDT DENDRITIC CELL MATURATION D                | 65                  | 3 (4.6)               | 0 (0)                | 3 (4.6)                | 0.0002 | 0.0095 |
| GUTIERREZ WALDENSTROEMS MACROGLOBULINEMIA 2          | 13                  | 2 (15.4)              | 0 (0)                | 2 (15.4)               | 0.0002 | 0.0095 |
| SERVITJA ISLET HNF1A TARGETS UP                      | 160                 | 4 (2.5)               | 0 (0)                | 4 (2.5)                | 0.0002 | 0.0098 |

**Table A109:** Significantly enriched MSigDB Chemical/Genetic Perturbation Sets (RNA-Seq, NK-cells, Day 28). Results sorted by FDR and #SDEG genes.

| Category Name               | Category<br>Genes # | Any-reg.<br>SDEG #(%) | Up-reg.<br>SDEG #(%) | Down-reg.<br>SDEG #(%) | P       | FDR    |
|-----------------------------|---------------------|-----------------------|----------------------|------------------------|---------|--------|
| Influenza A                 | 149                 | 5 (3.4)               | 5 (3.4)              | 0 (0)                  | <0.0001 | 0.0019 |
| TNF signaling pathway       | 102                 | 4 (3.9)               | 4 (3.9)              | 0 (0)                  | <0.0001 | 0.0019 |
| Hepatitis C                 | 117                 | 4 (3.4)               | 4 (3.4)              | 0 (0)                  | <0.0001 | 0.0019 |
| Prolactin signaling pathway | 67                  | 3 (4.5)               | 3 (4.5)              | 0 (0)                  | <0.0001 | 0.0064 |
| Rheumatoid arthritis        | 77                  | 3 (3.9)               | 3 (3.9)              | 0 (0)                  | 0.0001  | 0.0074 |

**Table A110:** Significantly enriched KEGG Pathways (RNA-Seq, T-cells, Day 1). Results sorted by FDR and #SDEG genes.

| Category Name                                  | Category<br>Genes # | Any-reg.<br>SDEG #(%) | Up-reg.<br>SDEG #(%) | Down-reg.<br>SDEG #(%) | P       | FDR    |
|------------------------------------------------|---------------------|-----------------------|----------------------|------------------------|---------|--------|
| NUYTEN EZH2 TARGETS UP                         | 1002                | 18 (1.8)              | 18 (1.8)             | 0 (0)                  | <0.0001 | 0.0005 |
| FULCHER INFLAMMATORY RESPONSE LECTIN VS LPS DN | 462                 | 15 (3.2)              | 15 (3.2)             | 0 (0)                  | <0.0001 | 0.0005 |
| HECKER IFNB1 TARGETS                           | 92                  | 15 (16.3)             | 15 (16.3)            | 0 (0)                  | <0.0001 | 0.0005 |
| TAKEDA TARGETS OF NUP98 HOXA9 FUSION 3D UP     | 178                 | 14 (7.9)              | 14 (7.9)             | 0 (0)                  | <0.0001 | 0.0005 |
| BERTUCCI MEDULLARY VS DUCTAL BREAST CANCER UP  | 200                 | 13 (6.5)              | 13 (6.5)             | 0 (0)                  | <0.0001 | 0.0005 |
| BROWNE INTERFERON RESPONSIVE GENES             | 68                  | 13 (19.1)             | 13 (19.1)            | 0 (0)                  | <0.0001 | 0.0005 |
| TAKEDA TARGETS OF NUP98 HOXA9 FUSION 10D UP    | 186                 | 13 (7)                | 13 (7)               | 0 (0)                  | <0.0001 | 0.0005 |
| WALLACE PROSTATE CANCER RACE UP                | 275                 | 13 (4.7)              | 13 (4.7)             | 0 (0)                  | <0.0001 | 0.0005 |
| NUYTEN NIPP1 TARGETS UP                        | 748                 | 12 (1.6)              | 12 (1.6)             | 0 (0)                  | <0.0001 | 0.0005 |
| SANA RESPONSE TO IFNG UP                       | 74                  | 12 (16.2)             | 12 (16.2)            | 0 (0)                  | <0.0001 | 0.0005 |
| BOSCO INTERFERON INDUCED ANTIVIRAL MODULE      | 76                  | 11 (14.5)             | 11 (14.5)            | 0 (0)                  | <0.0001 | 0.0005 |

| Category Name                                         | Category<br>Genes # | Any-reg.<br>SDEG #(%) | Up-reg.<br>SDEG #(%) | Down-reg.<br>SDEG #(%) | P       | FDR    |
|-------------------------------------------------------|---------------------|-----------------------|----------------------|------------------------|---------|--------|
| RODWELL AGING KIDNEY UP                               | 465                 | 11 (2.4)              | 11 (2.4)             | 0 (0)                  | <0.0001 | 0.0005 |
| GRAESSMANN APOPTOSIS BY SERUM DEPRIVATION UP          | 541                 | 10 (1.8)              | 10 (1.8)             | 0 (0)                  | <0.0001 | 0.0005 |
| GRAESSMANN RESPONSE TO MC AND SERUM DEPRIVATION UP    | 203                 | 10 (4.9)              | 10 (4.9)             | 0 (0)                  | <0.0001 | 0.0005 |
| JISON SICKLE CELL DISEASE UP                          | 174                 | 10 (5.7)              | 10 (5.7)             | 0 (0)                  | <0.0001 | 0.0005 |
| MOSERLE IFNA RESPONSE                                 | 31                  | 10 (32.3)             | 10 (32.3)            | 0 (0)                  | <0.0001 | 0.0005 |
| YANG BCL3 TARGETS UP                                  | 351                 | 10 (2.8)              | 10 (2.8)             | 0 (0)                  | <0.0001 | 0.0005 |
| CHICAS RB1 TARGETS CONFLUENT                          | 550                 | 9 (1.6)               | 9 (1.6)              | 0 (0)                  | <0.0001 | 0.0005 |
| DEBIASI APOPTOSIS BY REOVIRUS INFECTION UP            | 317                 | 9 (2.8)               | 9 (2.8)              | 0 (0)                  | <0.0001 | 0.0005 |
| FEVR CTNNB1 TARGETS UP                                | 672                 | 9 (1.3)               | 9 (1.3)              | 0 (0)                  | <0.0001 | 0.0005 |
| HELLER SILENCED BY METHYLATION UP                     | 273                 | 9 (3.3)               | 9 (3.3)              | 0 (0)                  | <0.0001 | 0.0005 |
| ICHIBA GRAFT VERSUS HOST DISEASE D7 UP                | 105                 | 9 (8.6)               | 9 (8.6)              | 0 (0)                  | <0.0001 | 0.0005 |
| MARKEY RB1 ACUTE LOF UP                               | 214                 | 9 (4.2)               | 9 (4.2)              | 0 (0)                  | <0.0001 | 0.0005 |
| TAKEDA TARGETS OF NUP98 HOXA9 FUSION 16D UP           | 169                 | 9 (5.3)               | 9 (5.3)              | 0 (0)                  | <0.0001 | 0.0005 |
| TAKEDA TARGETS OF NUP98 HOXA9 FUSION 8D UP            | 155                 | 9 (5.8)               | 9 (5.8)              | 0 (0)                  | <0.0001 | 0.0005 |
| DER IFN ALPHA RESPONSE UP                             | 74                  | 8 (10.8)              | 8 (10.8)             | 0 (0)                  | <0.0001 | 0.0005 |
| DER IFN BETA RESPONSE UP                              | 101                 | 8 (7.9)               | 8 (7.9)              | 0 (0)                  | <0.0001 | 0.0005 |
| EINAV INTERFERON SIGNATURE IN CANCER                  | 27                  | 8 (29.6)              | 8 (29.6)             | 0 (0)                  | <0.0001 | 0.0005 |
| FARMER BREAST CANCER CLUSTER 1                        | 39                  | 8 (20.5)              | 8 (20.5)             | 0 (0)                  | <0.0001 | 0.0005 |
| KRIEG KDM3A TARGETS NOT HYPOXIA                       | 189                 | 8 (4.2)               | 8 (4.2)              | 0 (0)                  | <0.0001 | 0.0005 |
| RADAEVA RESPONSE TO IFNA1 UP                          | 52                  | 8 (15.4)              | 8 (15.4)             | 0 (0)                  | <0.0001 | 0.0005 |
| SANA TNF SIGNALING UP                                 | 81                  | 8 (9.9)               | 8 (9.9)              | 0 (0)                  | <0.0001 | 0.0005 |
| BROCKE APOPTOSIS REVERSED BY IL6                      | 144                 | 7 (4.9)               | 7 (4.9)              | 0 (0)                  | <0.0001 | 0.0005 |
| DELYS THYROID CANCER UP                               | 435                 | 7 (1.6)               | 7 (1.6)              | 0 (0)                  | <0.0001 | 0.0005 |
| DER IFN GAMMA RESPONSE UP                             | 72                  | 7 (9.7)               | 7 (9.7)              | 0 (0)                  | <0.0001 | 0.0005 |
| GRUETZMANN PANCREATIC CANCER UP                       | 351                 | 7 (2)                 | 7 (2)                | 0 (0)                  | <0.0001 | 0.0005 |
| HORIUCHI WTAP TARGETS UP                              | 295                 | 7 (2.4)               | 7 (2.4)              | 0 (0)                  | <0.0001 | 0.0005 |
| LIANG SILENCED BY METHYLATION 2                       | 55                  | 7 (12.7)              | 7 (12.7)             | 0 (0)                  | <0.0001 | 0.0005 |
| MCLACHLAN DENTAL CARIES UP                            | 227                 | 7 (3.1)               | 7 (3.1)              | 0 (0)                  | <0.0001 | 0.0005 |
| PHONG TNF RESPONSE NOT VIA P38                        | 333                 | 7 (2.1)               | 7 (2.1)              | 0 (0)                  | <0.0001 | 0.0005 |
| SENGUPTA NASOPHARYNGEAL CARCINOMA WITH LMP1 UP        | 387                 | 7 (1.8)               | 7 (1.8)              | 0 (0)                  | <0.0001 | 0.0005 |
| ZHANG RESPONSE TO IKK INHIBITOR AND TNF UP            | 221                 | 7 (3.2)               | 7 (3.2)              | 0 (0)                  | <0.0001 | 0.0005 |
| ALTEMEIER RESPONSE TO LPS WITH MECHANICAL VENTILATION | 126                 | 6 (4.8)               | 6 (4.8)              | 0 (0)                  | <0.0001 | 0.0005 |
| BENNETT SYSTEMIC LUPUS ERYTHEMATOSUS                  | 32                  | 6 (18.8)              | 6 (18.8)             | 0 (0)                  | <0.0001 | 0.0005 |
| MCLACHLAN DENTAL CARIES DN                            | 219                 | 6 (2.7)               | 6 (2.7)              | 0 (0)                  | <0.0001 | 0.0005 |
| QI PLASMACYTOMA UP                                    | 251                 | 6 (2.4)               | 6 (2.4)              | 0 (0)                  | <0.0001 | 0.0005 |
| SEKI INFLAMMATORY RESPONSE LPS UP                     | 77                  | 6 (7.8)               | 6 (7.8)              | 0 (0)                  | <0.0001 | 0.0005 |
| UROSEVIC RESPONSE TO IMIQUIMOD                        | 23                  | 6 (26.1)              | 6 (26.1)             | 0 (0)                  | <0.0001 | 0.0005 |
| WIELAND UP BY HBV INFECTION                           | 100                 | 6 (6)                 | 6 (6)                | 0 (0)                  | <0.0001 | 0.0005 |

| Category Name                                       | Category<br>Genes # | Any-reg.<br>SDEG #(%) | Up-reg.<br>SDEG #(%) | Down-reg.<br>SDEG #(%) | P       | FDR    |
|-----------------------------------------------------|---------------------|-----------------------|----------------------|------------------------|---------|--------|
| BOWIE RESPONSE TO EXTRACELLULAR MATRIX              | 17                  | 5 (29.4)              | 5 (29.4)             | 0 (0)                  | <0.0001 | 0.0005 |
| BOWIE RESPONSE TO TAMOXIFEN                         | 18                  | 5 (27.8)              | 5 (27.8)             | 0 (0)                  | <0.0001 | 0.0005 |
| DAUER STAT3 TARGETS DN                              | 51                  | 5 (9.8)               | 5 (9.8)              | 0 (0)                  | <0.0001 | 0.0005 |
| FLECHNER BIOPSY KIDNEY TRANSPLANT REJECTED VS OK UP | 85                  | 5 (5.9)               | 5 (5.9)              | 0 (0)                  | <0.0001 | 0.0005 |
| GAVIN FOXP3 TARGETS CLUSTER P6                      | 85                  | 5 (5.9)               | 5 (5.9)              | 0 (0)                  | <0.0001 | 0.0005 |
| KRASNOSELSKAYA ILF3 TARGETS UP                      | 37                  | 5 (13.5)              | 5 (13.5)             | 0 (0)                  | <0.0001 | 0.0005 |
| LIU VAV3 PROSTATE CARCINOGENESIS UP                 | 85                  | 5 (5.9)               | 5 (5.9)              | 0 (0)                  | <0.0001 | 0.0005 |
| SEITZ NEOPLASTIC TRANSFORMATION BY 8P DELETION UP   | 69                  | 5 (7.2)               | 5 (7.2)              | 0 (0)                  | <0.0001 | 0.0005 |
| STAMBOLSKY TARGETS OF MUTATED TP53 DN               | 51                  | 5 (9.8)               | 5 (9.8)              | 0 (0)                  | <0.0001 | 0.0005 |
| ZHANG INTERFERON RESPONSE                           | 23                  | 5 (21.7)              | 5 (21.7)             | 0 (0)                  | <0.0001 | 0.0005 |
| ZHAN MULTIPLE MYELOMA LB DN                         | 39                  | 5 (12.8)              | 5 (12.8)             | 0 (0)                  | <0.0001 | 0.0005 |
| BOYALT LIVER CANCER SUBCLASS G5 DN                  | 27                  | 4 (14.8)              | 4 (14.8)             | 0 (0)                  | <0.0001 | 0.0005 |
| CHANG IMMORTALIZED BY HPV31 DN                      | 63                  | 4 (6.3)               | 4 (6.3)              | 0 (0)                  | <0.0001 | 0.0005 |
| GRANDVAUX IFN RESPONSE NOT VIA IRF3                 | 14                  | 4 (28.6)              | 4 (28.6)             | 0 (0)                  | <0.0001 | 0.0005 |
| GRANDVAUX IRF3 TARGETS UP                           | 15                  | 4 (26.7)              | 4 (26.7)             | 0 (0)                  | <0.0001 | 0.0005 |
| JECHLINGER EPITHELIAL TO MESENCHYMAL TRANSITION UP  | 71                  | 4 (5.6)               | 4 (5.6)              | 0 (0)                  | <0.0001 | 0.0005 |
| KHETCHOUMIAN TRIM24 TARGETS UP                      | 45                  | 4 (8.9)               | 4 (8.9)              | 0 (0)                  | <0.0001 | 0.0005 |
| MAHADEVAN RESPONSE TO MP470 UP                      | 19                  | 4 (21.1)              | 4 (21.1)             | 0 (0)                  | <0.0001 | 0.0005 |
| ROETH TERT TARGETS UP                               | 14                  | 4 (28.6)              | 4 (28.6)             | 0 (0)                  | <0.0001 | 0.0005 |
| WUNDER INFLAMMATORY RESPONSE AND CHOLESTEROL UP     | 61                  | 4 (6.6)               | 4 (6.6)              | 0 (0)                  | <0.0001 | 0.0005 |
| IIZUKA LIVER CANCER PROGRESSION G1 G2 UP            | 12                  | 3 (25)                | 3 (25)               | 0 (0)                  | <0.0001 | 0.0005 |
| WATANABE ULCERATIVE COLITIS WITH CANCER DN          | 13                  | 3 (23.1)              | 3 (23.1)             | 0 (0)                  | <0.0001 | 0.0005 |
| DODD NASOPHARYNGEAL CARCINOMA DN                    | 1330                | 10 (0.8)              | 10 (0.8)             | 0 (0)                  | <0.0001 | 0.0008 |
| COLINA TARGETS OF 4EBP1 AND 4EBP2                   | 339                 | 6 (1.8)               | 6 (1.8)              | 0 (0)                  | <0.0001 | 0.0008 |
| FOSTER TOLERANT MACROPHAGE UP                       | 155                 | 5 (3.2)               | 5 (3.2)              | 0 (0)                  | <0.0001 | 0.0008 |
| MIKKELSEN MCV6 LCP WITH H3K4ME3                     | 153                 | 5 (3.3)               | 5 (3.3)              | 0 (0)                  | <0.0001 | 0.0008 |
| PLASARI TGFB1 TARGETS 10HR DN                       | 233                 | 5 (2.1)               | 5 (2.1)              | 0 (0)                  | <0.0001 | 0.0008 |
| RIGGINS TAMOXIFEN RESISTANCE DN                     | 215                 | 5 (2.3)               | 5 (2.3)              | 0 (0)                  | <0.0001 | 0.0008 |
| TONKS TARGETS OF RUNX1 RUNX1T1 FUSION MONOCYTE UP   | 201                 | 5 (2.5)               | 5 (2.5)              | 0 (0)                  | <0.0001 | 0.0008 |
| BASSO CD40 SIGNALING UP                             | 99                  | 4 (4)                 | 4 (4)                | 0 (0)                  | <0.0001 | 0.0008 |
| DAUER STAT3 TARGETS UP                              | 50                  | 4 (8)                 | 4 (8)                | 0 (0)                  | <0.0001 | 0.0008 |
| KIM GLIS2 TARGETS UP                                | 84                  | 4 (4.8)               | 4 (4.8)              | 0 (0)                  | <0.0001 | 0.0008 |
| MISSIAGLIA REGULATED BY METHYLATION UP              | 120                 | 4 (3.3)               | 4 (3.3)              | 0 (0)                  | <0.0001 | 0.0008 |
| GROSS ELK3 TARGETS DN                               | 32                  | 3 (9.4)               | 3 (9.4)              | 0 (0)                  | <0.0001 | 0.0008 |
| NIKOLSKY OVERCONNECTED IN BREAST CANCER             | 21                  | 3 (14.3)              | 3 (14.3)             | 0 (0)                  | <0.0001 | 0.0008 |
| SHIN B CELL LYMPHOMA CLUSTER 8                      | 36                  | 3 (8.3)               | 3 (8.3)              | 0 (0)                  | <0.0001 | 0.0008 |
| YAN ESCAPE FROM ANOIKIS                             | 24                  | 3 (12.5)              | 3 (12.5)             | 0 (0)                  | <0.0001 | 0.0008 |
| GRAESSMANN APOPTOSIS BY DOXORUBICIN UP              | 1132                | 9 (0.8)               | 9 (0.8)              | 0 (0)                  | <0.0001 | 0.0011 |

| Category Name                                         | Category<br>Genes # | Any-reg.<br>SDEG #(%) | Up-reg.<br>SDEG #(%) | Down-reg.<br>SDEG #(%) | P       | FDR    |
|-------------------------------------------------------|---------------------|-----------------------|----------------------|------------------------|---------|--------|
| LIM MAMMARY STEM CELL DN                              | 422                 | 6 (1.4)               | 6 (1.4)              | 0 (0)                  | <0.0001 | 0.0011 |
| ACEVEDO FGFR1 TARGETS IN PROSTATE CANCER MODEL UP     | 278                 | 5 (1.8)               | 5 (1.8)              | 0 (0)                  | <0.0001 | 0.0011 |
| MIYAGAWA TARGETS OF EWSR1 ETS FUSIONS UP              | 247                 | 5 (2)                 | 5 (2)                | 0 (0)                  | <0.0001 | 0.0011 |
| TONKS TARGETS OF RUNX1 RUNX1T1 FUSION ERYTHROCYTE UP  | 151                 | 4 (2.6)               | 4 (2.6)              | 0 (0)                  | <0.0001 | 0.0011 |
| ABBUD LIF SIGNALING 1 UP                              | 46                  | 3 (6.5)               | 3 (6.5)              | 0 (0)                  | <0.0001 | 0.0011 |
| FOSTER TOLERANT MACROPHAGE DN                         | 405                 | 6 (1.5)               | 6 (1.5)              | 0 (0)                  | <0.0001 | 0.0015 |
| RICKMAN METASTASIS DN                                 | 258                 | 5 (1.9)               | 5 (1.9)              | 0 (0)                  | <0.0001 | 0.0018 |
| HAN JNK SINGALING UP                                  | 34                  | 3 (8.8)               | 3 (8.8)              | 0 (0)                  | <0.0001 | 0.0018 |
| GOZGIT ESR1 TARGETS DN                                | 741                 | 7 (0.9)               | 7 (0.9)              | 0 (0)                  | <0.0001 | 0.0021 |
| DOUGLAS BMI1 TARGETS DN                               | 308                 | 5 (1.6)               | 5 (1.6)              | 0 (0)                  | <0.0001 | 0.0021 |
| POOLA INVASIVE BREAST CANCER UP                       | 272                 | 5 (1.8)               | 5 (1.8)              | 0 (0)                  | <0.0001 | 0.0021 |
| SCHUETZ BREAST CANCER DUCTAL INVASIVE UP              | 338                 | 5 (1.5)               | 5 (1.5)              | 0 (0)                  | <0.0001 | 0.0021 |
| SEMBA FHIT TARGETS UP                                 | 11                  | 2 (18.2)              | 2 (18.2)             | 0 (0)                  | <0.0001 | 0.0024 |
| CASTELLANO NRAS TARGETS UP                            | 68                  | 3 (4.4)               | 3 (4.4)              | 0 (0)                  | <0.0001 | 0.0026 |
| GRAHAM CML QUIESCENT VS NORMAL DIVIDING UP            | 55                  | 3 (5.5)               | 3 (5.5)              | 0 (0)                  | <0.0001 | 0.0026 |
| PLASARI TGFB1 SIGNALING VIA NFIC 10HR UP              | 54                  | 3 (5.6)               | 3 (5.6)              | 0 (0)                  | <0.0001 | 0.0026 |
| MONNIER POSTRADIATION TUMOR ESCAPE DN                 | 357                 | 5 (1.4)               | 5 (1.4)              | 0 (0)                  | 0.0001  | 0.0036 |
| FURUKAWA DUSP6 TARGETS PCI35 UP                       | 73                  | 3 (4.1)               | 3 (4.1)              | 0 (0)                  | 0.0001  | 0.0038 |
| GARGALOVIC RESPONSE TO OXIDIZED PHOSPHOLIPIDS GREY DN | 73                  | 3 (4.1)               | 3 (4.1)              | 0 (0)                  | 0.0001  | 0.0038 |
| SHIN B CELL LYMPHOMA CLUSTER 5                        | 17                  | 2 (11.8)              | 2 (11.8)             | 0 (0)                  | 0.0001  | 0.0038 |
| SMID BREAST CANCER BASAL UP                           | 607                 | 6 (1)                 | 6 (1)                | 0 (0)                  | 0.0001  | 0.004  |
| PAPASPYRIDONOS UNSTABLE ATHEROSCLEROTIC PLAQUE UP     | 51                  | 3 (5.9)               | 3 (5.9)              | 0 (0)                  | 0.0001  | 0.004  |
| RUAN RESPONSE TO TNF UP                               | 12                  | 2 (16.7)              | 2 (16.7)             | 0 (0)                  | 0.0001  | 0.004  |
| WORSCHER TUMOR EVASION AND TOLEROGENICITY DN          | 15                  | 2 (13.3)              | 2 (13.3)             | 0 (0)                  | 0.0001  | 0.004  |
| LINDSTEDT DENDRITIC CELL MATURATION C                 | 69                  | 3 (4.3)               | 3 (4.3)              | 0 (0)                  | 0.0001  | 0.0041 |
| NATSUME RESPONSE TO INTERFERON BETA UP                | 71                  | 3 (4.2)               | 3 (4.2)              | 0 (0)                  | 0.0001  | 0.0041 |
| LEE SP4 THYMOCYTE                                     | 14                  | 2 (14.3)              | 2 (14.3)             | 0 (0)                  | 0.0001  | 0.0041 |
| TSAI DNAJB4 TARGETS UP                                | 13                  | 2 (15.4)              | 2 (15.4)             | 0 (0)                  | 0.0001  | 0.0041 |
| CHEN METABOLIC SYNDROM NETWORK                        | 1172                | 8 (0.7)               | 8 (0.7)              | 0 (0)                  | 0.0002  | 0.0046 |
| LINDSTEDT DENDRITIC CELL MATURATION A                 | 67                  | 3 (4.5)               | 3 (4.5)              | 0 (0)                  | 0.0002  | 0.0046 |
| ZHOU INFLAMMATORY RESPONSE LPS UP                     | 401                 | 5 (1.2)               | 5 (1.2)              | 0 (0)                  | 0.0002  | 0.0048 |
| LEE RECENT THYMIC EMIGRANT                            | 217                 | 4 (1.8)               | 4 (1.8)              | 0 (0)                  | 0.0002  | 0.0048 |
| WIERENGA STAT5A TARGETS UP                            | 210                 | 4 (1.9)               | 4 (1.9)              | 0 (0)                  | 0.0002  | 0.0048 |
| JACKSON DNMT1 TARGETS UP                              | 76                  | 3 (3.9)               | 3 (3.9)              | 0 (0)                  | 0.0002  | 0.0048 |
| WANG RESPONSE TO GSK3 INHIBITOR SB216763 UP           | 378                 | 5 (1.3)               | 5 (1.3)              | 0 (0)                  | 0.0002  | 0.0052 |
| GALINDO IMMUNE RESPONSE TO ENTEROTOXIN                | 85                  | 3 (3.5)               | 3 (3.5)              | 0 (0)                  | 0.0002  | 0.0052 |
| HINATA NFKB TARGETS KERATINOCYTE UP                   | 91                  | 3 (3.3)               | 3 (3.3)              | 0 (0)                  | 0.0002  | 0.0062 |
| YORDY RECIPROCAL REGULATION BY ETS1 AND SP100 DN      | 81                  | 3 (3.7)               | 3 (3.7)              | 0 (0)                  | 0.0002  | 0.0062 |

| Category Name                                  | Category<br>Genes # | Any-reg.<br>SDEG #(%) | Up-reg.<br>SDEG #(%) | Down-reg.<br>SDEG #(%) | P      | FDR    |
|------------------------------------------------|---------------------|-----------------------|----------------------|------------------------|--------|--------|
| ZHU CMV 24 HR UP                               | 93                  | 3 (3.2)               | 3 (3.2)              | 0 (0)                  | 0.0002 | 0.0062 |
| SARTIPY BLUNTED BY INSULIN RESISTANCE UP       | 19                  | 2 (10.5)              | 2 (10.5)             | 0 (0)                  | 0.0002 | 0.0067 |
| DANG REGULATED BY MYC DN                       | 247                 | 4 (1.6)               | 4 (1.6)              | 0 (0)                  | 0.0003 | 0.0068 |
| BENPORATH ES CORE NINE CORRELATED              | 95                  | 3 (3.2)               | 3 (3.2)              | 0 (0)                  | 0.0003 | 0.0068 |
| JOHNSTONE PARVB TARGETS 3 UP                   | 425                 | 5 (1.2)               | 5 (1.2)              | 0 (0)                  | 0.0003 | 0.007  |
| RASHI NFKB1 TARGETS                            | 19                  | 2 (10.5)              | 2 (10.5)             | 0 (0)                  | 0.0003 | 0.007  |
| BAELDE DIABETIC NEPHROPATHY DN                 | 425                 | 5 (1.2)               | 5 (1.2)              | 0 (0)                  | 0.0003 | 0.0072 |
| RUAN RESPONSE TO TNF TROGLITAZONE UP           | 17                  | 2 (11.8)              | 2 (11.8)             | 0 (0)                  | 0.0003 | 0.0072 |
| ZWANG TRANSIENTLY UP BY 1ST EGF PULSE ONLY     | 1723                | 9 (0.5)               | 9 (0.5)              | 0 (0)                  | 0.0003 | 0.0081 |
| MARTENS BOUND BY PML RARA FUSION               | 446                 | 5 (1.1)               | 5 (1.1)              | 0 (0)                  | 0.0003 | 0.0081 |
| LEE BMP2 TARGETS UP                            | 723                 | 6 (0.8)               | 6 (0.8)              | 0 (0)                  | 0.0003 | 0.0084 |
| VERHAAK AML WITH NPM1 MUTATED DN               | 238                 | 4 (1.7)               | 4 (1.7)              | 0 (0)                  | 0.0003 | 0.0084 |
| HELLER HDAC TARGETS SILENCED BY METHYLATION DN | 269                 | 4 (1.5)               | 4 (1.5)              | 0 (0)                  | 0.0003 | 0.0086 |
| CHARAFE BREAST CANCER LUMINAL VS BASAL DN      | 440                 | 5 (1.1)               | 5 (1.1)              | 0 (0)                  | 0.0004 | 0.009  |
| GARY CD5 TARGETS UP                            | 458                 | 5 (1.1)               | 5 (1.1)              | 0 (0)                  | 0.0004 | 0.01   |

**Table A111:** Significantly enriched MSigDB Chemical/Genetic Perturbation Sets (RNA-Seq, T-cells, Day 1). Results sorted by FDR and #SDEG genes.

| Study Visit | Treatment Group | N  | Gene Variables | IMO Variables | CV   | Canonical Correlation (C1) | Canonical Correlation (C2) | Explained Variance (Gene Variables, C1+C2) | Explained Variance (IMO Variables, C1+C2) |
|-------------|-----------------|----|----------------|---------------|------|----------------------------|----------------------------|--------------------------------------------|-------------------------------------------|
| Day 1       | SV-AS03         | 10 | 40             | 13            | 0.96 | 0.96                       | 0.94                       | 0.38                                       | 0.40                                      |
| Day 1       | SV-PBS          | 9  | 40             | 13            | 0.88 | 0.99                       | 0.98                       | 0.56                                       | 0.32                                      |
| Day 3       | SV-AS03         | 10 | 70             | 13            | 0.91 | 0.99                       | 0.93                       | 0.14                                       | 0.52                                      |
| Day 3       | SV-PBS          | 9  | 70             | 13            | 0.73 | 0.94                       | 0.93                       | 0.33                                       | 0.64                                      |
| Day 7       | SV-AS03         | 10 | 23             | 13            | 0.76 | 0.97                       | 0.86                       | 0.15                                       | 0.54                                      |
| Day 7       | SV-PBS          | 10 | 23             | 13            | 0.65 | 0.98                       | 0.95                       | 0.14                                       | 0.51                                      |
| Day 28      | SV-AS03         | 8  | 33             | 14            | 0.72 | 0.93                       | 0.88                       | 0.34                                       | 0.57                                      |
| Day 28      | SV-PBS          | 10 | 33             | 14            | 0.57 | 0.94                       | 0.94                       | 0.32                                       | 0.39                                      |

**Table A112:** Canonical correlation analysis summary statistics (RNA-Seq, B-cells)

| Study Visit | Treatment Group | N  | Gene Variables | IMO Variables | CV   | Canonical Correlation (C1) | Canonical Correlation (C2) | Explained Variance (Gene Variables, C1+C2) | Explained Variance (IMO Variables, C1+C2) |
|-------------|-----------------|----|----------------|---------------|------|----------------------------|----------------------------|--------------------------------------------|-------------------------------------------|
| Day 1       | SV-AS03         | 10 | 246            | 13            | 0.86 | 0.94                       | 0.94                       | 0.41                                       | 0.51                                      |
| Day 1       | SV-PBS          | 10 | 246            | 13            | 0.65 | 0.96                       | 0.96                       | 0.23                                       | 0.34                                      |
| Day 3       | SV-AS03         | 10 | 54             | 13            | 0.83 | 0.96                       | 0.93                       | 0.30                                       | 0.28                                      |
| Day 3       | SV-PBS          | 10 | 54             | 13            | 0.71 | 0.96                       | 0.95                       | 0.23                                       | 0.58                                      |
| Day 7       | SV-AS03         | 10 | 24             | 13            | 0.54 | 0.98                       | 0.97                       | 0.26                                       | 0.34                                      |
| Day 7       | SV-PBS          | 10 | 24             | 13            | 0.78 | 0.97                       | 0.95                       | 0.39                                       | 0.34                                      |
| Day 28      | SV-AS03         | 10 | 36             | 14            | 0.38 | 0.97                       | 0.94                       | 0.19                                       | 0.57                                      |
| Day 28      | SV-PBS          | 9  | 36             | 14            | 0.57 | 0.96                       | 0.95                       | 0.52                                       | 0.24                                      |

**Table A113:** Canonical correlation analysis summary statistics (RNA-Seq, Dendritic cells)

| Study Visit | Treatment Group | N  | Gene Variables | IMO Variables | CV   | Canonical Correlation (C1) | Canonical Correlation (C2) | Explained Variance (Gene Variables, C1+C2) | Explained Variance (IMO Variables, C1+C2) |
|-------------|-----------------|----|----------------|---------------|------|----------------------------|----------------------------|--------------------------------------------|-------------------------------------------|
| Day 1       | SV-AS03         | 10 | 425            | 13            | 0.86 | 0.99                       | 0.97                       | 0.44                                       | 0.33                                      |
| Day 1       | SV-PBS          | 10 | 425            | 13            | 0.56 | 0.96                       | 0.94                       | 0.24                                       | 0.36                                      |
| Day 3       | SV-AS03         | 10 | 40             | 13            | 0.92 | 0.98                       | 0.96                       | 0.49                                       | 0.35                                      |
| Day 3       | SV-PBS          | 10 | 40             | 13            | 0.80 | 0.99                       | 0.98                       | 0.21                                       | 0.65                                      |
| Day 7       | SV-AS03         | 10 | 16             | 13            | 0.20 | 0.98                       | 0.93                       | 0.51                                       | 0.23                                      |
| Day 7       | SV-PBS          | 10 | 16             | 13            | 0.65 | 0.99                       | 0.98                       | 0.55                                       | 0.34                                      |
| Day 28      | SV-AS03         | 10 | 20             | 14            | 0.88 | 0.98                       | 0.96                       | 0.23                                       | 0.54                                      |
| Day 28      | SV-PBS          | 10 | 20             | 14            | 0.83 | 0.97                       | 0.95                       | 0.44                                       | 0.16                                      |

**Table A114:** Canonical correlation analysis summary statistics (RNA-Seq, Monocytes)

| Study Visit | Treatment Group | N  | Gene Variables | IMO Variables | CV   | Canonical Correlation (C1) | Canonical Correlation (C2) | Explained Variance (Gene Variables, C1+C2) | Explained Variance (IMO Variables, C1+C2) |
|-------------|-----------------|----|----------------|---------------|------|----------------------------|----------------------------|--------------------------------------------|-------------------------------------------|
| Day 1       | SV-AS03         | 10 | 756            | 13            | 0.81 | 1.00                       | 0.99                       | 0.66                                       | 0.23                                      |
| Day 1       | SV-PBS          | 10 | 756            | 13            | 0.90 | 0.96                       | 0.93                       | 0.23                                       | 0.40                                      |
| Day 3       | SV-AS03         | 10 | 153            | 13            | 0.45 | 0.98                       | 0.91                       | 0.17                                       | 0.52                                      |

| Study Visit | Treatment Group | N  | Gene Variables | IMO Variables | CV   | Canonical Correlation (C1) | Canonical Correlation (C2) | Explained Variance (Gene Variables, C1+C2) | Explained Variance (IMO Variables, C1+C2) |
|-------------|-----------------|----|----------------|---------------|------|----------------------------|----------------------------|--------------------------------------------|-------------------------------------------|
| Day 3       | SV-PBS          | 10 | 153            | 13            | 0.32 | 1.00                       | 1.00                       | 0.45                                       | 0.15                                      |
| Day 7       | SV-AS03         | 10 | 39             | 13            | 0.68 | 0.95                       | 0.94                       | 0.35                                       | 0.49                                      |
| Day 7       | SV-PBS          | 10 | 39             | 13            | 0.81 | 0.97                       | 0.95                       | 0.26                                       | 0.45                                      |
| Day 28      | SV-AS03         | 9  | 73             | 14            | 0.93 | 0.98                       | 0.96                       | 0.30                                       | 0.57                                      |
| Day 28      | SV-PBS          | 10 | 73             | 14            | 0.78 | 0.99                       | 0.98                       | 0.32                                       | 0.29                                      |

**Table A115:** Canonical correlation analysis summary statistics (RNA-Seq, Neutrophils)

| Study Visit | Treatment Group | N  | Gene Variables | IMO Variables | CV   | Canonical Correlation (C1) | Canonical Correlation (C2) | Explained Variance (Gene Variables, C1+C2) | Explained Variance (IMO Variables, C1+C2) |
|-------------|-----------------|----|----------------|---------------|------|----------------------------|----------------------------|--------------------------------------------|-------------------------------------------|
| Day 1       | SV-AS03         | 10 | 113            | 13            | 0.88 | 0.99                       | 0.98                       | 0.54                                       | 0.35                                      |
| Day 1       | SV-PBS          | 10 | 113            | 13            | 0.63 | 0.98                       | 0.97                       | 0.17                                       | 0.38                                      |
| Day 3       | SV-AS03         | 10 | 110            | 13            | 0.78 | 0.96                       | 0.94                       | 0.60                                       | 0.45                                      |
| Day 3       | SV-PBS          | 10 | 110            | 13            | 0.81 | 0.93                       | 0.90                       | 0.33                                       | 0.57                                      |
| Day 7       | SV-AS03         | 10 | 33             | 13            | 0.60 | 0.93                       | 0.92                       | 0.31                                       | 0.41                                      |
| Day 7       | SV-PBS          | 10 | 33             | 13            | 0.89 | 0.97                       | 0.94                       | 0.40                                       | 0.53                                      |
| Day 28      | SV-AS03         | 10 | 294            | 14            | 0.74 | 1.00                       | 1.00                       | 0.42                                       | 0.57                                      |
| Day 28      | SV-PBS          | 10 | 294            | 14            | 0.64 | 0.98                       | 0.97                       | 0.19                                       | 0.45                                      |

**Table A116:** Canonical correlation analysis summary statistics (RNA-Seq, NK-cells)

| Study Visit | Treatment Group | N  | Gene Variables | IMO Variables | CV   | Canonical Correlation (C1) | Canonical Correlation (C2) | Explained Variance (Gene Variables, C1+C2) | Explained Variance (IMO Variables, C1+C2) |
|-------------|-----------------|----|----------------|---------------|------|----------------------------|----------------------------|--------------------------------------------|-------------------------------------------|
| Day 1       | SV-AS03         | 10 | 60             | 13            | 0.95 | 0.95                       | 0.90                       | 0.72                                       | 0.32                                      |
| Day 1       | SV-PBS          | 9  | 60             | 13            | 0.47 | 0.94                       | 0.94                       | 0.55                                       | 0.39                                      |
| Day 3       | SV-AS03         | 9  | 17             | 13            | 0.82 | 0.98                       | 0.94                       | 0.13                                       | 0.56                                      |
| Day 3       | SV-PBS          | 10 | 17             | 13            | 0.72 | 0.96                       | 0.94                       | 0.22                                       | 0.61                                      |
| Day 7       | SV-AS03         | 10 | 15             | 13            | 0.35 | 0.97                       | 0.97                       | 0.37                                       | 0.37                                      |
| Day 7       | SV-PBS          | 10 | 15             | 13            | 0.76 | 0.96                       | 0.93                       | 0.29                                       | 0.44                                      |
| Day 28      | SV-AS03         | 10 | 15             | 14            | 0.54 | 0.94                       | 0.94                       | 0.49                                       | 0.21                                      |
| Day 28      | SV-PBS          | 10 | 15             | 14            | 0.90 | 0.96                       | 0.94                       | 0.23                                       | 0.34                                      |

**Table A117:** Canonical correlation analysis summary statistics (RNA-Seq, T-cells)



| Gene ID         | Gene Name     | G1<br>(SV-<br>AS03) | G1<br>(SV-<br>PBS) | G2<br>(SV-<br>AS03) | G2<br>(SV-<br>PBS) | V1<br>(SV-<br>AS03) | V1<br>(SV-<br>PBS) | V2<br>(SV-<br>AS03) | V2<br>(SV-<br>PBS) | V1+V2<br>(SV-<br>AS03) | V1+V2<br>(SV-<br>PBS) |
|-----------------|---------------|---------------------|--------------------|---------------------|--------------------|---------------------|--------------------|---------------------|--------------------|------------------------|-----------------------|
| ENSG00000116663 | FBXO6         | 0.54                | -0.81              | 0.31                | -0.56              | 28.7                | 65.1               | 9.5                 | 31.6               | 38.2                   | 96.7                  |
| ENSG00000137959 | IFI44L        | 0.63                | -0.86              | 0.57                | -0.45              | 39.6                | 73.8               | 33.0                | 19.9               | 72.5                   | 93.7                  |
| ENSG00000163993 | S100P         | -0.46               | 0.80               | 0.30                | -0.54              | 20.7                | 64.2               | 9.0                 | 29.5               | 29.7                   | 93.7                  |
| ENSG00000117228 | GBP1          | 0.42                | -0.90              | 0.62                | -0.34              | 17.7                | 81.6               | 39.1                | 11.3               | 56.8                   | 92.9                  |
| ENSG00000115415 | STAT1         | 0.30                | -0.89              | 0.71                | -0.34              | 9.3                 | 79.0               | 50.0                | 11.7               | 59.3                   | 90.7                  |
| ENSG00000162645 | GBP2          | 0.44                | -0.91              | 0.60                | -0.26              | 19.4                | 82.1               | 35.7                | 6.6                | 55.1                   | 88.7                  |
| ENSG00000162654 | GBP4          | 0.54                | -0.89              | 0.63                | -0.29              | 28.9                | 79.6               | 40.2                | 8.4                | 69.2                   | 88.0                  |
| ENSG00000087237 | CETP          | 0.26                | -0.80              | 0.30                | -0.44              | 6.9                 | 64.2               | 9.2                 | 19.3               | 16.1                   | 83.5                  |
| ENSG00000125347 | IRF1          | 0.55                | -0.90              | 0.34                | 0.10               | 30.1                | 81.9               | 11.9                | 1.0                | 42.0                   | 82.9                  |
| ENSG00000140511 | HAPLN3        | 0.54                | -0.84              | 0.42                | -0.34              | 28.7                | 70.6               | 17.5                | 11.5               | 46.2                   | 82.1                  |
| ENSG00000180287 | PLD5          | 0.24                | -0.90              | 0.04                | 0.00               | 5.9                 | 81.0               | 0.1                 | 0.0                | 6.0                    | 81.0                  |
| ENSG00000119917 | IFIT3         | 0.63                | -0.76              | 0.50                | -0.47              | 39.3                | 58.2               | 24.6                | 21.7               | 63.9                   | 79.9                  |
| ENSG00000134326 | CMPK2         | 0.28                | -0.88              | 0.48                | -0.06              | 7.7                 | 78.1               | 22.8                | 0.4                | 30.5                   | 78.5                  |
| ENSG00000154451 | GBP5          | 0.53                | -0.80              | 0.64                | -0.34              | 28.2                | 63.5               | 40.8                | 11.5               | 68.9                   | 75.0                  |
| ENSG00000151689 | INPP1         | 0.48                | -0.86              | 0.61                | 0.02               | 22.7                | 74.5               | 37.5                | 0.0                | 60.2                   | 74.5                  |
| ENSG00000184779 | RPS17         | 0.08                | -0.79              | -0.50               | -0.32              | 0.6                 | 62.4               | 24.8                | 10.4               | 25.4                   | 72.8                  |
| ENSG00000125810 | CD93          | -0.73               | 0.44               | 0.41                | 0.62               | 52.8                | 19.3               | 17.0                | 39.0               | 69.7                   | 58.3                  |
| ENSG00000185745 | IFIT1         | 0.56                | -0.54              | 0.32                | -0.64              | 30.8                | 29.1               | 10.4                | 40.3               | 41.2                   | 69.4                  |
| ENSG00000221963 | APOL6         | 0.27                | -0.75              | 0.52                | -0.34              | 7.2                 | 56.6               | 26.6                | 11.9               | 33.8                   | 68.5                  |
| ENSG00000123689 | G0S2          | -0.35               | 0.72               | -0.34               | 0.34               | 12.2                | 52.2               | 11.4                | 11.4               | 23.6                   | 63.6                  |
| ENSG00000163464 | CXCR1         | -0.62               | 0.73               | -0.18               | -0.08              | 38.9                | 53.9               | 3.2                 | 0.6                | 42.1                   | 54.4                  |
| ENSG00000171051 | FPR1          | -0.71               | 0.50               | 0.19                | 0.52               | 50.0                | 25.1               | 3.8                 | 27.2               | 53.8                   | 52.3                  |
| ENSG00000172159 | FRMD3         | 0.34                | -0.65              | 0.64                | -0.21              | 11.5                | 41.7               | 41.4                | 4.6                | 53.0                   | 46.3                  |
| ENSG00000085265 | FCN1          | -0.72               | -0.18              | -0.07               | 0.59               | 51.7                | 3.2                | 0.5                 | 34.6               | 52.2                   | 37.9                  |
| ENSG00000225972 | RP5-857K21.9  | -0.08               | -0.63              | -0.49               | -0.30              | 0.7                 | 39.3               | 23.5                | 8.7                | 24.2                   | 48.0                  |
| ENSG00000203747 | FCGR3A        | -0.29               | -0.35              | 0.26                | 0.59               | 8.6                 | 12.4               | 6.5                 | 34.8               | 15.1                   | 47.2                  |
| ENSG00000155974 | GRIP1         | 0.43                | -0.65              | -0.33               | -0.20              | 18.6                | 42.7               | 10.6                | 4.1                | 29.2                   | 46.8                  |
| ENSG00000248121 | AC005562.2    | -0.22               | 0.13               | 0.63                | -0.12              | 4.9                 | 1.6                | 39.6                | 1.4                | 44.5                   | 3.0                   |
| ENSG00000257924 | RP11-493L12.5 | 0.31                | -0.07              | 0.58                | 0.27               | 9.6                 | 0.4                | 33.2                | 7.6                | 42.8                   | 8.0                   |
| ENSG00000214872 | SMTNL1        | 0.42                | -0.62              | 0.27                | -0.16              | 17.8                | 38.9               | 7.3                 | 2.7                | 25.1                   | 41.5                  |
| ENSG00000126822 | PLEKHG3       | 0.48                | -0.13              | -0.43               | 0.47               | 22.9                | 1.7                | 18.2                | 21.7               | 41.0                   | 23.4                  |
| ENSG00000010030 | ETV7          | 0.29                | -0.60              | -0.25               | 0.19               | 8.3                 | 36.2               | 6.2                 | 3.8                | 14.5                   | 40.0                  |
| ENSG00000073756 | PTGS2         | 0.17                | 0.63               | 0.26                | -0.09              | 2.8                 | 39.1               | 6.9                 | 0.9                | 9.7                    | 40.0                  |
| ENSG00000114315 | HES1          | 0.37                | 0.06               | -0.37               | 0.57               | 13.8                | 0.4                | 13.5                | 32.4               | 27.3                   | 32.8                  |
| ENSG00000225131 | PSME2P2       | 0.51                | -0.21              | 0.25                | 0.24               | 26.0                | 4.5                | 6.1                 | 5.8                | 32.1                   | 10.4                  |
| ENSG00000128849 | CGNL1         | -0.54               | 0.39               | 0.03                | 0.11               | 29.2                | 15.3               | 0.1                 | 1.1                | 29.3                   | 16.4                  |
| ENSG00000178997 | EXD1          | -0.41               | -0.16              | -0.07               | 0.48               | 16.8                | 2.6                | 0.5                 | 23.3               | 17.3                   | 25.9                  |
| ENSG00000090382 | LYZ           | -0.34               | 0.18               | 0.36                | 0.12               | 11.8                | 3.1                | 13.1                | 1.5                | 24.8                   | 4.6                   |
| ENSG00000212743 | AL137145.1    | 0.19                | 0.34               | -0.20               | 0.19               | 3.8                 | 11.4               | 3.8                 | 3.5                | 7.6                    | 15.0                  |
| ENSG00000011600 | TYROBP        | -0.35               | 0.19               | -0.12               | 0.25               | 12.6                | 3.4                | 1.6                 | 6.3                | 14.1                   | 9.8                   |

**Table A118:** Canonical loadings and explained variance (RNA-Seq, B-cells, Day 1, Gene variables). Gene variables with at least 25% of explained variance for the first two canonical variates are listed. GX: canonical loadings for canonical variate X, VX: % explained variance for canonical variate X, V1+V2: total % explained variance for both canonical variates. Values for CCA results with a poor cross validation score (< 0.70) are left blank. Sorted by maximum explained variance across treatments (V1+V2).

| IMO Vari-<br>able | IMO Variable Name                   | I1<br>(SV-<br>AS03) | I1<br>(SV-<br>PBS) | I2<br>(SV-<br>AS03) | I2<br>(SV-<br>PBS) | V1<br>(SV-<br>AS03) | V1<br>(SV-<br>PBS) | V2<br>(SV-<br>AS03) | V2<br>(SV-<br>PBS) | V1+V2<br>(SV-<br>AS03) | V1+V2<br>(SV-<br>PBS) |
|-------------------|-------------------------------------|---------------------|--------------------|---------------------|--------------------|---------------------|--------------------|---------------------|--------------------|------------------------|-----------------------|
| IP-10             | Interferon gamma-induced protein 10 | 0.63                | -0.78              | 0.37                | -0.43              | 39.3                | 60.8               | 13.7                | 18.2               | 53.1                   | 79.0                  |

| IMO Variable   | IMO Variable Name                  | I1<br>(SV-<br>AS03) | I1<br>(SV-<br>PBS) | I2<br>(SV-<br>AS03) | I2<br>(SV-<br>PBS) | V1<br>(SV-<br>AS03) | V1<br>(SV-<br>PBS) | V2<br>(SV-<br>AS03) | V2<br>(SV-<br>PBS) | V1+V2<br>(SV-<br>AS03) | V1+V2<br>(SV-<br>PBS) |
|----------------|------------------------------------|---------------------|--------------------|---------------------|--------------------|---------------------|--------------------|---------------------|--------------------|------------------------|-----------------------|
| IL-1 $\beta$   | Interleukin-1 beta                 | 0.85                | -0.07              | -0.11               | -0.27              | 71.9                | 0.4                | 1.2                 | 7.5                | 73.1                   | 7.9                   |
| IL-8           | Interleukin-8                      | 0.33                | -0.62              | -0.41               | 0.57               | 10.6                | 38.3               | 17.0                | 33.0               | 27.6                   | 71.3                  |
| MIP-1 $\alpha$ | Macrophage inflammatory protein    | 0.57                | -0.54              | 0.61                | -0.26              | 32.5                | 29.5               | 36.9                | 6.5                | 69.4                   | 36.0                  |
| IL-6           | Interleukin-6                      | 0.78                | -0.08              | 0.00                | 0.21               | 61.4                | 0.6                | 0.0                 | 4.4                | 61.4                   | 5.0                   |
| IL-10          | Interleukin-10                     | 0.60                | -0.69              | -0.03               | 0.36               | 35.7                | 47.4               | 0.1                 | 12.9               | 35.8                   | 60.3                  |
| MCP-1          | Monocyte chemoattractant protein-1 | 0.51                | -0.74              | -0.46               | -0.12              | 25.6                | 54.7               | 20.9                | 1.6                | 46.5                   | 56.2                  |
| Eotaxin-1      | Eotaxin-1                          | -0.36               | 0.27               | -0.55               | 0.11               | 12.9                | 7.3                | 30.1                | 1.2                | 43.0                   | 8.5                   |
| Nt             | Microneutralization inhibition     | 0.01                | -0.47              | -0.60               | -0.35              | 0.0                 | 22.1               | 35.5                | 12.1               | 35.6                   | 34.3                  |
| IL-12p70       | Interleukin-12 p70                 | 0.14                | 0.01               | 0.50                | 0.55               | 2.0                 | 0.0                | 25.1                | 30.0               | 27.1                   | 30.0                  |
| TNF            | Tumor necrosis factors             | 0.05                | -0.14              | -0.53               | -0.40              | 0.2                 | 2.0                | 28.4                | 16.1               | 28.7                   | 18.1                  |
| RANTES         | Chemokine (C-C motif) ligand 5     | 0.23                | -0.08              | 0.29                | 0.22               | 5.2                 | 0.6                | 8.3                 | 4.8                | 13.5                   | 5.4                   |
| IFN- $\gamma$  | Interferon gamma                   | -0.28               | -0.06              | 0.01                | 0.19               | 8.0                 | 0.4                | 0.0                 | 3.7                | 8.0                    | 4.1                   |

**Table A119:** Canonical loadings and explained variance (RNA-Seq, B-cells, Day 1, IMO variables). IMO variables with at least 25% of explained variance for the first two canonical variates are listed. GX: canonical loadings for canonical variate X, VX: % explained variance for canonical variate X, V1+V2: total % explained variance for both canonical variates. Values for CCA results with a poor cross validation score (< 0.70) are left blank. Sorted by maximum explained variance across treatments (V1+V2).

| Gene ID         | Gene Name     | G1<br>(SV-<br>AS03) | G1<br>(SV-<br>PBS) | G2<br>(SV-<br>AS03) | G2<br>(SV-<br>PBS) | V1<br>(SV-<br>AS03) | V1<br>(SV-<br>PBS) | V2<br>(SV-<br>AS03) | V2<br>(SV-<br>PBS) | V1+V2<br>(SV-<br>AS03) | V1+V2<br>(SV-<br>PBS) |
|-----------------|---------------|---------------------|--------------------|---------------------|--------------------|---------------------|--------------------|---------------------|--------------------|------------------------|-----------------------|
| ENSG00000232553 | CLK2P         | 0.84                | -0.77              | 0.28                | 0.06               | 70.2                | 58.7               | 7.7                 | 0.3                | 77.9                   | 59.1                  |
| ENSG00000221869 | CEBPD         | -0.36               | -0.83              | 0.10                | 0.15               | 12.8                | 68.4               | 1.1                 | 2.1                | 13.9                   | 70.5                  |
| ENSG00000163464 | CXCR1         | 0.02                | -0.65              | 0.21                | 0.45               | 0.0                 | 41.8               | 4.3                 | 20.3               | 4.4                    | 62.0                  |
| ENSG00000147459 | DOCK5         | -0.24               | -0.56              | 0.05                | 0.51               | 5.7                 | 31.6               | 0.2                 | 26.4               | 5.9                    | 58.0                  |
| ENSG00000082074 | FYB           | -0.35               | -0.63              | -0.02               | 0.43               | 12.3                | 39.3               | 0.0                 | 18.2               | 12.3                   | 57.6                  |
| ENSG00000228960 | OR2A9P        | 0.37                | 0.74               | 0.16                | -0.15              | 13.8                | 55.0               | 2.6                 | 2.1                | 16.3                   | 57.1                  |
| ENSG00000011600 | TYROBP        | -0.34               | -0.72              | 0.19                | 0.20               | 11.4                | 51.2               | 3.4                 | 3.9                | 14.9                   | 55.1                  |
| ENSG00000120318 | ARAP3         | -0.05               | -0.71              | -0.33               | 0.20               | 0.2                 | 50.9               | 11.1                | 4.0                | 11.3                   | 54.9                  |
| ENSG00000119917 | IFIT3         | -0.64               | -0.24              | -0.34               | 0.29               | 41.1                | 5.6                | 11.7                | 8.5                | 52.8                   | 14.1                  |
| ENSG00000225603 | RP11-325P15.1 | 0.53                | 0.72               | -0.12               | 0.05               | 28.2                | 52.5               | 1.4                 | 0.3                | 29.6                   | 52.7                  |
| ENSG00000123689 | G0S2          | -0.08               | -0.66              | 0.19                | 0.31               | 0.6                 | 43.1               | 3.5                 | 9.4                | 4.1                    | 52.5                  |
| ENSG00000232838 | AL050321.1    | -0.40               | -0.68              | 0.21                | -0.25              | 16.0                | 45.7               | 4.4                 | 6.2                | 20.4                   | 51.9                  |
| ENSG00000166825 | ANPEP         | -0.17               | -0.56              | 0.15                | 0.45               | 2.8                 | 31.2               | 2.2                 | 20.4               | 5.0                    | 51.6                  |
| ENSG00000203747 | FCGR3A        | -0.44               | -0.66              | 0.40                | 0.28               | 19.8                | 43.0               | 16.3                | 8.1                | 36.1                   | 51.1                  |
| ENSG00000172243 | CLEC7A        | -0.36               | -0.50              | 0.12                | 0.50               | 12.9                | 24.9               | 1.5                 | 25.4               | 14.4                   | 50.3                  |
| ENSG00000067182 | TNFRSF1A      | -0.13               | -0.42              | 0.27                | 0.57               | 1.7                 | 17.7               | 7.3                 | 32.2               | 9.1                    | 49.9                  |
| ENSG00000140749 | IGSF6         | -0.44               | -0.69              | -0.12               | 0.11               | 19.2                | 48.3               | 1.5                 | 1.2                | 20.7                   | 49.5                  |
| ENSG00000151948 | GLT1D1        | -0.26               | -0.46              | 0.25                | 0.50               | 6.8                 | 21.3               | 6.2                 | 24.8               | 12.9                   | 46.1                  |
| ENSG00000112742 | TTK           | -0.27               | -0.41              | 0.24                | 0.54               | 7.4                 | 16.7               | 6.0                 | 29.0               | 13.3                   | 45.8                  |
| ENSG00000143546 | S100A8        | -0.28               | -0.58              | 0.04                | 0.32               | 7.7                 | 34.0               | 0.2                 | 10.1               | 7.9                    | 44.1                  |
| ENSG00000072110 | ACTN1         | -0.40               | -0.59              | -0.04               | 0.29               | 16.0                | 35.0               | 0.1                 | 8.7                | 16.2                   | 43.7                  |
| ENSG00000197249 | SERPINA1      | -0.31               | -0.65              | 0.02                | 0.10               | 9.8                 | 42.3               | 0.0                 | 1.0                | 9.8                    | 43.3                  |
| ENSG00000133048 | CHI3L1        | 0.16                | -0.63              | 0.18                | 0.16               | 2.4                 | 40.2               | 3.3                 | 2.6                | 5.7                    | 42.8                  |
| ENSG00000252331 | AP002812.1    | 0.22                | -0.62              | 0.04                | 0.17               | 4.7                 | 38.1               | 0.1                 | 2.9                | 4.9                    | 41.0                  |
| ENSG00000146592 | CREB5         | -0.42               | -0.30              | 0.04                | 0.56               | 18.0                | 9.1                | 0.1                 | 31.8               | 18.1                   | 40.9                  |
| ENSG00000162747 | FCGR3B        | 0.02                | -0.61              | 0.25                | 0.18               | 0.0                 | 36.9               | 6.2                 | 3.2                | 6.3                    | 40.1                  |
| ENSG00000185215 | TNFAIP2       | -0.46               | -0.50              | 0.06                | 0.38               | 21.1                | 25.4               | 0.4                 | 14.2               | 21.5                   | 39.6                  |
| ENSG00000038427 | VCAN          | -0.57               | 0.62               | 0.07                | 0.12               | 32.0                | 37.9               | 0.6                 | 1.4                | 32.6                   | 39.3                  |

| Gene ID         | Gene Name    | G1<br>(SV-<br>AS03) | G1<br>(SV-<br>PBS) | G2<br>(SV-<br>AS03) | G2<br>(SV-<br>PBS) | V1<br>(SV-<br>AS03) | V1<br>(SV-<br>PBS) | V2<br>(SV-<br>AS03) | V2<br>(SV-<br>PBS) | V1+V2<br>(SV-<br>AS03) | V1+V2<br>(SV-<br>PBS) |
|-----------------|--------------|---------------------|--------------------|---------------------|--------------------|---------------------|--------------------|---------------------|--------------------|------------------------|-----------------------|
| ENSG00000186529 | CYP4F3       | -0.22               | -0.53              | 0.27                | 0.33               | 4.8                 | 28.0               | 7.3                 | 11.1               | 12.1                   | 39.1                  |
| ENSG00000126822 | PLEKHG3      | -0.03               | -0.22              | 0.34                | 0.57               | 0.1                 | 5.0                | 11.2                | 32.4               | 11.3                   | 37.4                  |
| ENSG00000160593 | AMICA1       | -0.45               | -0.57              | 0.19                | 0.22               | 20.3                | 32.7               | 3.4                 | 4.7                | 23.7                   | 37.4                  |
| ENSG00000131669 | NINJ1        | -0.13               | -0.59              | 0.22                | 0.15               | 1.7                 | 34.8               | 4.6                 | 2.3                | 6.4                    | 37.1                  |
| ENSG00000075426 | FOSL2        | -0.19               | -0.57              | 0.25                | 0.19               | 3.6                 | 32.9               | 6.3                 | 3.7                | 9.9                    | 36.6                  |
| ENSG00000135636 | DYSF         | -0.29               | -0.48              | 0.13                | 0.37               | 8.6                 | 22.8               | 1.6                 | 13.5               | 10.3                   | 36.3                  |
| ENSG00000185745 | IFIT1        | -0.45               | -0.22              | -0.40               | 0.36               | 20.1                | 4.8                | 15.8                | 12.9               | 35.9                   | 17.7                  |
| ENSG00000169429 | IL8          | -0.18               | -0.49              | 0.01                | 0.33               | 3.4                 | 24.3               | 0.0                 | 11.1               | 3.4                    | 35.4                  |
| ENSG00000188056 | TREML4       | 0.33                | 0.24               | 0.49                | 0.17               | 10.9                | 5.8                | 24.1                | 2.9                | 35.0                   | 8.7                   |
| ENSG00000124731 | TREM1        | -0.22               | -0.49              | 0.14                | 0.33               | 4.9                 | 23.8               | 1.9                 | 10.8               | 6.8                    | 34.5                  |
| ENSG00000252318 | AC097532.1   | 0.52                | -0.25              | -0.26               | -0.10              | 27.0                | 6.1                | 6.7                 | 0.9                | 33.7                   | 7.0                   |
| ENSG00000162551 | ALPL         | 0.05                | -0.46              | 0.29                | 0.35               | 0.3                 | 21.1               | 8.4                 | 12.5               | 8.6                    | 33.7                  |
| ENSG00000197405 | C5AR1        | -0.47               | -0.51              | 0.01                | 0.27               | 21.6                | 25.9               | 0.0                 | 7.2                | 21.6                   | 33.1                  |
| ENSG00000180871 | CXCR2        | -0.04               | -0.50              | 0.23                | 0.28               | 0.1                 | 24.6               | 5.4                 | 7.8                | 5.5                    | 32.4                  |
| ENSG00000165801 | ARHGEF40     | -0.42               | -0.05              | 0.38                | 0.29               | 17.8                | 0.2                | 14.2                | 8.6                | 32.0                   | 8.8                   |
| ENSG00000134830 | GPR77        | 0.40                | -0.08              | -0.26               | 0.56               | 16.2                | 0.6                | 6.8                 | 30.9               | 23.0                   | 31.5                  |
| ENSG00000119535 | CSF3R        | -0.18               | -0.51              | 0.14                | 0.20               | 3.3                 | 26.1               | 1.9                 | 4.0                | 5.3                    | 30.1                  |
| ENSG00000163220 | S100A9       | -0.29               | -0.52              | 0.13                | 0.17               | 8.3                 | 27.0               | 1.6                 | 2.9                | 9.9                    | 29.9                  |
| ENSG00000171051 | FPR1         | -0.33               | -0.52              | 0.05                | 0.15               | 11.0                | 27.4               | 0.3                 | 2.3                | 11.3                   | 29.8                  |
| ENSG00000236496 | RP11-255J3.2 | -0.43               | 0.09               | -0.33               | -0.38              | 18.4                | 0.9                | 11.2                | 14.7               | 29.6                   | 15.5                  |
| ENSG00000128383 | APOBEC3A     | -0.28               | -0.35              | 0.00                | 0.41               | 8.0                 | 11.9               | 0.0                 | 16.8               | 8.0                    | 28.7                  |
| ENSG00000100504 | PYGL         | -0.23               | -0.29              | 0.07                | 0.44               | 5.1                 | 8.2                | 0.5                 | 19.3               | 5.6                    | 27.5                  |
| ENSG00000126262 | FFAR2        | 0.01                | -0.48              | 0.08                | 0.21               | 0.0                 | 23.0               | 0.7                 | 4.5                | 0.7                    | 27.4                  |
| ENSG00000125810 | CD93         | -0.50               | -0.48              | 0.06                | 0.07               | 25.0                | 22.8               | 0.4                 | 0.5                | 25.4                   | 23.3                  |
| ENSG00000173868 | PHOSPHO1     | -0.18               | -0.26              | 0.15                | 0.41               | 3.1                 | 6.7                | 2.1                 | 16.5               | 5.3                    | 23.2                  |
| ENSG00000252197 | AC091047.1   | 0.21                | -0.48              | 0.10                | 0.01               | 4.5                 | 23.2               | 1.0                 | 0.0                | 5.5                    | 23.2                  |
| ENSG00000179087 | MGAM         | -0.05               | -0.37              | 0.02                | 0.31               | 0.3                 | 13.5               | 0.1                 | 9.4                | 0.3                    | 22.8                  |
| ENSG00000252229 | AC098691.1   | 0.27                | -0.48              | 0.12                | -0.03              | 7.5                 | 22.6               | 1.5                 | 0.1                | 9.0                    | 22.7                  |
| ENSG00000073756 | PTGS2        | -0.07               | -0.43              | 0.45                | 0.16               | 0.5                 | 18.7               | 20.4                | 2.7                | 20.9                   | 21.4                  |
| ENSG00000173535 | TNFRSF10C    | -0.10               | -0.34              | 0.11                | 0.30               | 1.0                 | 11.8               | 1.2                 | 8.8                | 2.1                    | 20.7                  |
| ENSG00000228696 | ARL17B       | -0.03               | -0.42              | -0.05               | -0.17              | 0.1                 | 17.3               | 0.2                 | 2.9                | 0.3                    | 20.3                  |
| ENSG00000252666 | AD000090.1   | 0.45                | -0.26              | -0.01               | 0.06               | 19.9                | 6.7                | 0.0                 | 0.3                | 20.0                   | 7.0                   |
| ENSG00000244734 | HBB          | -0.13               | -0.44              | 0.25                | -0.03              | 1.6                 | 19.1               | 6.5                 | 0.1                | 8.1                    | 19.2                  |
| ENSG00000008516 | MMP25        | -0.11               | -0.40              | -0.07               | 0.16               | 1.1                 | 16.0               | 0.5                 | 2.7                | 1.6                    | 18.7                  |
| ENSG00000163993 | S100P        | -0.29               | -0.39              | 0.25                | 0.15               | 8.3                 | 15.2               | 6.3                 | 2.4                | 14.6                   | 17.6                  |
| ENSG00000184524 | CEND1        | 0.39                | -0.23              | 0.14                | 0.34               | 15.2                | 5.2                | 1.9                 | 11.4               | 17.1                   | 16.6                  |
| ENSG00000103569 | AQP9         | -0.12               | -0.40              | 0.04                | -0.03              | 1.5                 | 15.9               | 0.2                 | 0.1                | 1.7                    | 16.1                  |
| ENSG00000117115 | PADI2        | 0.00                | -0.26              | 0.05                | 0.27               | 0.0                 | 6.7                | 0.3                 | 7.3                | 0.3                    | 13.9                  |
| ENSG00000163823 | CCR1         | -0.23               | -0.13              | -0.28               | 0.28               | 5.5                 | 1.7                | 7.9                 | 7.7                | 13.4                   | 9.4                   |
| ENSG00000198754 | OXCT2        | -0.11               | -0.06              | 0.24                | -0.23              | 1.2                 | 0.4                | 5.7                 | 5.5                | 6.9                    | 5.9                   |
| ENSG00000127954 | STEAP4       | -0.18               | -0.20              | 0.08                | 0.17               | 3.2                 | 4.0                | 0.6                 | 2.8                | 3.8                    | 6.7                   |
| ENSG00000182885 | GPR97        | -0.09               | -0.14              | 0.19                | 0.14               | 0.7                 | 2.1                | 3.4                 | 1.9                | 4.2                    | 4.0                   |

**Table A120:** Canonical loadings and explained variance (RNA-Seq, B-cells, Day 3, Gene variables). Gene variables with at least 25% of explained variance for the first two canonical variates are listed. GX: canonical loadings for canonical variate X, VX: % explained variance for canonical variate X, V1+V2: total % explained variance for both canonical variates. Values for CCA results with a poor cross validation score (< 0.70) are left blank. Sorted by maximum explained variance across treatments (V1+V2).

| IMO Variable   | IMO Variable Name                   | I1<br>(SV-<br>AS03) | I1<br>(SV-<br>PBS) | I2<br>(SV-<br>AS03) | I2<br>(SV-<br>PBS) | V1<br>(SV-<br>AS03) | V1<br>(SV-<br>PBS) | V2<br>(SV-<br>AS03) | V2<br>(SV-<br>PBS) | V1+V2<br>(SV-<br>AS03) | V1+V2<br>(SV-<br>PBS) |
|----------------|-------------------------------------|---------------------|--------------------|---------------------|--------------------|---------------------|--------------------|---------------------|--------------------|------------------------|-----------------------|
| IL-12p70       | Interleukin-12 p70                  | -0.98               | 0.95               | -0.21               | 0.17               | 95.5                | 90.7               | 4.2                 | 2.9                | 99.7                   | 93.6                  |
| IFN- $\gamma$  | Interferon gamma                    | -0.34               | 0.07               | 0.22                | 0.97               | 11.5                | 0.6                | 4.9                 | 93.4               | 16.3                   | 94.0                  |
| IL-10          | Interleukin-10                      | -0.74               | 0.41               | 0.40                | 0.86               | 54.2                | 17.1               | 16.0                | 73.7               | 70.1                   | 90.9                  |
| TNF            | Tumor necrosis factors              | -0.70               | 0.16               | 0.06                | 0.92               | 49.2                | 2.6                | 0.4                 | 85.4               | 49.6                   | 88.0                  |
| IL-1 $\beta$   | Interleukin-1 beta                  | -0.69               | 0.09               | 0.62                | 0.93               | 48.1                | 0.8                | 38.3                | 85.9               | 86.4                   | 86.7                  |
| IL-8           | Interleukin-8                       | -0.74               | -0.02              | 0.55                | 0.87               | 54.4                | 0.1                | 29.8                | 75.1               | 84.2                   | 75.1                  |
| IL-6           | Interleukin-6                       | -0.62               | -0.12              | 0.13                | 0.88               | 39.0                | 1.4                | 1.7                 | 77.2               | 40.8                   | 78.7                  |
| MCP-1          | Monocyte chemoattractant protein-1  | 0.52                | -0.18              | 0.69                | -0.11              | 26.5                | 3.1                | 47.1                | 1.1                | 73.7                   | 4.3                   |
| MIP-1 $\alpha$ | Macrophage inflammatory protein     | -0.46               | -0.53              | 0.56                | 0.63               | 21.1                | 27.7               | 31.6                | 39.9               | 52.7                   | 67.6                  |
| Nt             | Microneutralization inhibition      | 0.41                | -0.01              | 0.43                | 0.77               | 16.6                | 0.0                | 18.2                | 58.8               | 34.8                   | 58.8                  |
| IP-10          | Interferon gamma-induced protein 10 | -0.41               | -0.39              | -0.25               | 0.66               | 16.8                | 14.9               | 6.3                 | 43.7               | 23.1                   | 58.7                  |
| RANTES         | Chemokine (C-C motif) ligand 5      | 0.01                | -0.40              | 0.50                | -0.25              | 0.0                 | 16.2               | 25.3                | 6.3                | 25.4                   | 22.4                  |
| Eotaxin-1      | Eotaxin-1                           | -0.03               | -0.26              | 0.45                | 0.04               | 0.1                 | 6.9                | 20.7                | 0.2                | 20.8                   | 7.0                   |

**Table A121:** Canonical loadings and explained variance (RNA-Seq, B-cells, Day 3, IMO variables). IMO variables with at least 25% of explained variance for the first two canonical variates are listed. GX: canonical loadings for canonical variate X, VX: % explained variance for canonical variate X, V1+V2: total % explained variance for both canonical variates. Values for CCA results with a poor cross validation score (< 0.70) are left blank. Sorted by maximum explained variance across treatments (V1+V2).

| Gene ID         | Gene Name      | G1<br>(SV-<br>AS03) | G1<br>(SV-<br>PBS) | G2<br>(SV-<br>AS03) | G2<br>(SV-<br>PBS) | V1<br>(SV-<br>AS03) | V1<br>(SV-<br>PBS) | V2<br>(SV-<br>AS03) | V2<br>(SV-<br>PBS) | V1+V2<br>(SV-<br>AS03) | V1+V2<br>(SV-<br>PBS) |
|-----------------|----------------|---------------------|--------------------|---------------------|--------------------|---------------------|--------------------|---------------------|--------------------|------------------------|-----------------------|
| ENSG00000234925 | RP11-254B13.3  | 0.72                |                    | -0.20               |                    | 51.4                |                    | 4.0                 |                    | 55.4                   |                       |
| ENSG00000206885 | SNORA75_206885 | 0.66                |                    | -0.26               |                    | 43.0                |                    | 6.5                 |                    | 49.6                   |                       |
| ENSG00000182985 | CADM1          | 0.06                |                    | -0.56               |                    | 0.4                 |                    | 31.3                |                    | 31.7                   |                       |
| ENSG00000105974 | CAV1           | 0.50                |                    | 0.22                |                    | 25.3                |                    | 5.0                 |                    | 30.3                   |                       |
| ENSG00000126262 | FFAR2          | -0.48               |                    | -0.23               |                    | 23.1                |                    | 5.1                 |                    | 28.3                   |                       |
| ENSG00000169679 | BUB1           | 0.41                |                    | 0.11                |                    | 16.6                |                    | 1.2                 |                    | 17.8                   |                       |
| ENSG00000089685 | BIRC5          | 0.26                |                    | -0.32               |                    | 7.0                 |                    | 10.6                |                    | 17.5                   |                       |
| ENSG00000211643 | IGLV5-52       | 0.37                |                    | -0.19               |                    | 13.5                |                    | 3.7                 |                    | 17.2                   |                       |
| ENSG00000148773 | MKI67          | 0.23                |                    | -0.29               |                    | 5.4                 |                    | 8.2                 |                    | 13.6                   |                       |
| ENSG00000153162 | BMP6           | 0.32                |                    | -0.14               |                    | 10.3                |                    | 1.9                 |                    | 12.2                   |                       |
| ENSG00000253755 | IGHGP          | -0.19               |                    | -0.29               |                    | 3.6                 |                    | 8.2                 |                    | 11.8                   |                       |
| ENSG00000112378 | PERP           | 0.24                |                    | -0.20               |                    | 5.8                 |                    | 4.2                 |                    | 9.9                    |                       |
| ENSG00000174946 | GPR171         | -0.30               |                    | 0.06                |                    | 9.1                 |                    | 0.4                 |                    | 9.5                    |                       |
| ENSG00000121807 | CCR2           | 0.28                |                    | 0.09                |                    | 7.6                 |                    | 0.9                 |                    | 8.4                    |                       |
| ENSG00000214544 | GTF2IRD2P1     | 0.01                |                    | -0.25               |                    | 0.0                 |                    | 6.3                 |                    | 6.3                    |                       |
| ENSG00000171848 | RRM2           | 0.14                |                    | -0.12               |                    | 1.9                 |                    | 1.5                 |                    | 3.4                    |                       |
| ENSG00000117399 | CDC20          | 0.17                |                    | -0.07               |                    | 2.9                 |                    | 0.5                 |                    | 3.4                    |                       |
| ENSG00000169429 | IL8            | -0.17               |                    | 0.00                |                    | 2.8                 |                    | 0.0                 |                    | 2.8                    |                       |
| ENSG00000244734 | HBB            | 0.16                |                    | 0.01                |                    | 2.6                 |                    | 0.0                 |                    | 2.6                    |                       |
| ENSG00000111424 | VDR            | 0.13                |                    | -0.05               |                    | 1.7                 |                    | 0.2                 |                    | 1.9                    |                       |
| ENSG00000128311 | TST            | 0.08                |                    | 0.10                |                    | 0.6                 |                    | 1.0                 |                    | 1.6                    |                       |
| ENSG00000180535 | BHLHA15        | 0.12                |                    | -0.02               |                    | 1.5                 |                    | 0.0                 |                    | 1.5                    |                       |
| ENSG00000066279 | ASPM           | -0.01               |                    | -0.04               |                    | 0.0                 |                    | 0.2                 |                    | 0.2                    |                       |

| Gene ID | Gene Name | G1<br>(SV-<br>AS03) | G1<br>(SV-<br>PBS) | G2<br>(SV-<br>AS03) | G2<br>(SV-<br>PBS) | V1<br>(SV-<br>AS03) | V1<br>(SV-<br>PBS) | V2<br>(SV-<br>AS03) | V2<br>(SV-<br>PBS) | V1+V2<br>(SV-<br>AS03) | V1+V2<br>(SV-<br>PBS) |
|---------|-----------|---------------------|--------------------|---------------------|--------------------|---------------------|--------------------|---------------------|--------------------|------------------------|-----------------------|
|---------|-----------|---------------------|--------------------|---------------------|--------------------|---------------------|--------------------|---------------------|--------------------|------------------------|-----------------------|

**Table A122:** Canonical loadings and explained variance (RNA-Seq, B-cells, Day 7, Gene variables). Gene variables with at least 25% of explained variance for the first two canonical variates are listed. GX: canonical loadings for canonical variate X, VX: % explained variance for canonical variate X, V1+V2: total % explained variance for both canonical variates. Values for CCA results with a poor cross validation score (< 0.70) are left blank. Sorted by maximum explained variance across treatments (V1+V2).

| IMO Vari-<br>able | IMO Variable Name                   | I1<br>(SV-<br>AS03) | I1<br>(SV-<br>PBS) | I2<br>(SV-<br>AS03) | I2<br>(SV-<br>PBS) | V1<br>(SV-<br>AS03) | V1<br>(SV-<br>PBS) | V2<br>(SV-<br>AS03) | V2<br>(SV-<br>PBS) | V1+V2<br>(SV-<br>AS03) | V1+V2<br>(SV-<br>PBS) |
|-------------------|-------------------------------------|---------------------|--------------------|---------------------|--------------------|---------------------|--------------------|---------------------|--------------------|------------------------|-----------------------|
| IL-12p70          | Interleukin-12 p70                  | 0.96                |                    | 0.07                |                    | 93.0                |                    | 0.5                 |                    | 93.6                   |                       |
| IL-1 $\beta$      | Interleukin-1 beta                  | 0.69                |                    | -0.67               |                    | 47.4                |                    | 44.3                |                    | 91.7                   |                       |
| IL-6              | Interleukin-6                       | 0.63                |                    | 0.69                |                    | 39.7                |                    | 47.3                |                    | 87.0                   |                       |
| TNF               | Tumor necrosis factors              | 0.87                |                    | -0.12               |                    | 76.0                |                    | 1.4                 |                    | 77.4                   |                       |
| Nt                | Microneutralization inhibition      | -0.14               |                    | -0.85               |                    | 1.9                 |                    | 72.2                |                    | 74.1                   |                       |
| IL-10             | Interleukin-10                      | 0.82                |                    | -0.13               |                    | 66.6                |                    | 1.7                 |                    | 68.3                   |                       |
| IL-8              | Interleukin-8                       | 0.72                |                    | -0.05               |                    | 52.2                |                    | 0.3                 |                    | 52.4                   |                       |
| RANTES            | Chemokine (C-C motif) ligand 5      | 0.60                |                    | -0.38               |                    | 35.5                |                    | 14.1                |                    | 49.6                   |                       |
| Eotaxin-1         | Eotaxin-1                           | 0.53                |                    | 0.30                |                    | 27.7                |                    | 8.8                 |                    | 36.5                   |                       |
| IP-10             | Interferon gamma-induced protein 10 | -0.06               |                    | -0.55               |                    | 0.4                 |                    | 30.1                |                    | 30.5                   |                       |
| MCP-1             | Monocyte chemoattractant protein-1  | 0.38                |                    | 0.28                |                    | 14.7                |                    | 8.1                 |                    | 22.8                   |                       |
| IFN- $\gamma$     | Interferon gamma                    | 0.29                |                    | 0.11                |                    | 8.4                 |                    | 1.3                 |                    | 9.7                    |                       |
| MIP-1 $\alpha$    | Macrophage inflammatory protein     | 0.21                |                    | 0.14                |                    | 4.5                 |                    | 2.0                 |                    | 6.4                    |                       |

**Table A123:** Canonical loadings and explained variance (RNA-Seq, B-cells, Day 7, IMO variables). IMO variables with at least 25% of explained variance for the first two canonical variates are listed. GX: canonical loadings for canonical variate X, VX: % explained variance for canonical variate X, V1+V2: total % explained variance for both canonical variates. Values for CCA results with a poor cross validation score (< 0.70) are left blank. Sorted by maximum explained variance across treatments (V1+V2).

| Gene ID         | Gene Name     | G1<br>(SV-<br>AS03) | G1<br>(SV-<br>PBS) | G2<br>(SV-<br>AS03) | G2<br>(SV-<br>PBS) | V1<br>(SV-<br>AS03) | V1<br>(SV-<br>PBS) | V2<br>(SV-<br>AS03) | V2<br>(SV-<br>PBS) | V1+V2<br>(SV-<br>AS03) | V1+V2<br>(SV-<br>PBS) |
|-----------------|---------------|---------------------|--------------------|---------------------|--------------------|---------------------|--------------------|---------------------|--------------------|------------------------|-----------------------|
| ENSG00000253712 | RP11-697M17.2 | 0.89                |                    | -0.12               |                    | 78.9                |                    | 1.3                 |                    | 80.3                   |                       |
| ENSG00000256875 | RP11-503G7.2  | 0.77                |                    | -0.39               |                    | 59.9                |                    | 15.5                |                    | 75.3                   |                       |
| ENSG00000221535 | AC027319.1    | 0.67                |                    | 0.44                |                    | 44.5                |                    | 19.0                |                    | 63.5                   |                       |
| ENSG00000038427 | VCAN          | -0.13               |                    | -0.77               |                    | 1.8                 |                    | 59.7                |                    | 61.5                   |                       |
| ENSG00000243469 | AC018755.10   | -0.19               |                    | 0.74                |                    | 3.6                 |                    | 54.2                |                    | 57.8                   |                       |
| ENSG00000180644 | PRF1          | -0.23               |                    | 0.72                |                    | 5.5                 |                    | 51.4                |                    | 56.9                   |                       |
| ENSG00000241431 | RP11-17A4.1   | -0.71               |                    | -0.14               |                    | 50.0                |                    | 1.9                 |                    | 51.8                   |                       |
| ENSG00000123689 | G0S2          | -0.69               |                    | 0.06                |                    | 48.0                |                    | 0.4                 |                    | 48.4                   |                       |
| ENSG00000253326 | RP11-261C10.6 | 0.55                |                    | -0.39               |                    | 30.6                |                    | 15.3                |                    | 45.9                   |                       |
| ENSG00000233280 | AC110491.1    | -0.40               |                    | 0.54                |                    | 15.6                |                    | 29.5                |                    | 45.2                   |                       |
| ENSG00000162571 | TTLL10        | 0.52                |                    | -0.38               |                    | 27.1                |                    | 14.2                |                    | 41.4                   |                       |
| ENSG00000112742 | TTK           | -0.49               |                    | 0.41                |                    | 23.8                |                    | 17.2                |                    | 41.0                   |                       |
| ENSG00000237588 | RP11-66D17.3  | 0.51                |                    | 0.37                |                    | 26.2                |                    | 13.6                |                    | 39.8                   |                       |
| ENSG00000239559 | RPL37P2       | -0.63               |                    | -0.04               |                    | 39.3                |                    | 0.2                 |                    | 39.5                   |                       |
| ENSG00000223551 | TMSL4         | -0.60               |                    | -0.13               |                    | 36.1                |                    | 1.6                 |                    | 37.6                   |                       |
| ENSG00000228655 | AC096558.1    | -0.58               |                    | 0.17                |                    | 34.0                |                    | 2.9                 |                    | 36.9                   |                       |
| ENSG00000213590 | RP11-229P13.2 | 0.51                |                    | 0.26                |                    | 26.2                |                    | 6.9                 |                    | 33.1                   |                       |

| Gene ID         | Gene Name    | G1<br>(SV-<br>AS03) | G1<br>(SV-<br>PBS) | G2<br>(SV-<br>AS03) | G2<br>(SV-<br>PBS) | V1<br>(SV-<br>AS03) | V1<br>(SV-<br>PBS) | V2<br>(SV-<br>AS03) | V2<br>(SV-<br>PBS) | V1+V2<br>(SV-<br>AS03) | V1+V2<br>(SV-<br>PBS) |
|-----------------|--------------|---------------------|--------------------|---------------------|--------------------|---------------------|--------------------|---------------------|--------------------|------------------------|-----------------------|
| ENSG00000152939 | MARVELD2     | -0.05               |                    | 0.57                |                    | 0.3                 |                    | 32.8                |                    | 33.1                   |                       |
| ENSG00000244734 | HBB          | -0.43               |                    | 0.34                |                    | 18.7                |                    | 11.8                |                    | 30.5                   |                       |
| ENSG00000182885 | GPR97        | 0.28                |                    | 0.46                |                    | 7.9                 |                    | 21.2                |                    | 29.1                   |                       |
| ENSG00000235613 | CCDC55P1     | 0.38                |                    | 0.32                |                    | 14.5                |                    | 10.1                |                    | 24.6                   |                       |
| ENSG00000187951 | ARHGAP11B    | -0.40               |                    | 0.27                |                    | 16.1                |                    | 7.2                 |                    | 23.4                   |                       |
| ENSG00000230850 | BX571672.1   | -0.38               |                    | 0.19                |                    | 14.1                |                    | 3.7                 |                    | 17.8                   |                       |
| ENSG00000197249 | SERPINA1     | -0.25               |                    | -0.32               |                    | 6.3                 |                    | 10.1                |                    | 16.5                   |                       |
| ENSG00000230280 | RP11-38O14.1 | -0.39               |                    | 0.07                |                    | 15.1                |                    | 0.5                 |                    | 15.6                   |                       |
| ENSG00000170345 | FOS          | -0.18               |                    | -0.32               |                    | 3.2                 |                    | 10.4                |                    | 13.6                   |                       |
| ENSG00000215086 | RP11-522H2.3 | -0.34               |                    | 0.09                |                    | 11.4                |                    | 0.8                 |                    | 12.2                   |                       |
| ENSG00000011600 | TYROBP       | -0.26               |                    | -0.22               |                    | 6.7                 |                    | 5.0                 |                    | 11.6                   |                       |
| ENSG00000242766 | IGKV1D-17    | -0.01               |                    | -0.28               |                    | 0.0                 |                    | 7.9                 |                    | 7.9                    |                       |
| ENSG00000251209 | AC024651.1   | -0.14               |                    | 0.22                |                    | 2.0                 |                    | 5.0                 |                    | 7.0                    |                       |
| ENSG00000155428 | TRIM74       | 0.10                |                    | -0.22               |                    | 1.0                 |                    | 5.0                 |                    | 6.0                    |                       |
| ENSG00000127954 | STEAP4       | 0.16                |                    | -0.11               |                    | 2.7                 |                    | 1.1                 |                    | 3.8                    |                       |
| ENSG00000171051 | FPR1         | -0.12               |                    | -0.04               |                    | 1.5                 |                    | 0.2                 |                    | 1.7                    |                       |

**Table A124:** Canonical loadings and explained variance (RNA-Seq, B-cells, Day 28, Gene variables). Gene variables with at least 25% of explained variance for the first two canonical variates are listed. GX: canonical loadings for canonical variate X, VX: % explained variance for canonical variate X, V1+V2: total % explained variance for both canonical variates. Values for CCA results with a poor cross validation score (< 0.70) are left blank. Sorted by maximum explained variance across treatments (V1+V2).

| IMO Vari-<br>able | IMO Variable Name                   | I1<br>(SV-<br>AS03) | I1<br>(SV-<br>PBS) | I2<br>(SV-<br>AS03) | I2<br>(SV-<br>PBS) | V1<br>(SV-<br>AS03) | V1<br>(SV-<br>PBS) | V2<br>(SV-<br>AS03) | V2<br>(SV-<br>PBS) | V1+V2<br>(SV-<br>AS03) | V1+V2<br>(SV-<br>PBS) |
|-------------------|-------------------------------------|---------------------|--------------------|---------------------|--------------------|---------------------|--------------------|---------------------|--------------------|------------------------|-----------------------|
| IL-12p70          | Interleukin-12 p70                  | -0.95               |                    | 0.25                |                    | 90.2                |                    | 6.4                 |                    | 96.6                   |                       |
| IL-10             | Interleukin-10                      | -0.33               |                    | 0.91                |                    | 10.9                |                    | 83.0                |                    | 93.9                   |                       |
| HAI               | Hemagglutination inhibition         | 0.71                |                    | 0.59                |                    | 50.8                |                    | 35.0                |                    | 85.8                   |                       |
| Nt                | Microneutralization inhibition      | 0.73                |                    | 0.55                |                    | 53.9                |                    | 30.3                |                    | 84.2                   |                       |
| Eotaxin-1         | Eotaxin-1                           | -0.32               |                    | 0.79                |                    | 10.4                |                    | 62.5                |                    | 72.9                   |                       |
| IL-6              | Interleukin-6                       | -0.75               |                    | -0.23               |                    | 56.8                |                    | 5.4                 |                    | 62.2                   |                       |
| IL-8              | Interleukin-8                       | -0.46               |                    | 0.63                |                    | 20.8                |                    | 40.3                |                    | 61.1                   |                       |
| IP-10             | Interferon gamma-induced protein 10 | 0.41                |                    | 0.61                |                    | 16.9                |                    | 36.9                |                    | 53.8                   |                       |
| IL-1 $\beta$      | Interleukin-1 beta                  | -0.40               |                    | 0.52                |                    | 16.4                |                    | 27.4                |                    | 43.8                   |                       |
| TNF               | Tumor necrosis factors              | -0.30               |                    | 0.58                |                    | 8.7                 |                    | 33.3                |                    | 42.1                   |                       |
| RANTES            | Chemokine (C-C motif) ligand 5      | -0.26               |                    | 0.50                |                    | 6.9                 |                    | 24.7                |                    | 31.6                   |                       |
| IFN- $\gamma$     | Interferon gamma                    | 0.37                |                    | 0.41                |                    | 13.7                |                    | 17.0                |                    | 30.7                   |                       |
| MIP-1 $\alpha$    | Macrophage inflammatory protein     | -0.31               |                    | -0.40               |                    | 9.8                 |                    | 16.0                |                    | 25.8                   |                       |
| MCP-1             | Monocyte chemoattractant protein-1  | -0.39               |                    | 0.21                |                    | 15.3                |                    | 4.4                 |                    | 19.7                   |                       |

**Table A125:** Canonical loadings and explained variance (RNA-Seq, B-cells, Day 28, IMO variables). IMO variables with at least 25% of explained variance for the first two canonical variates are listed. GX: canonical loadings for canonical variate X, VX: % explained variance for canonical variate X, V1+V2: total % explained variance for both canonical variates. Values for CCA results with a poor cross validation score (< 0.70) are left blank. Sorted by maximum explained variance across treatments (V1+V2).

| Gene ID         | Gene Name     | G1<br>(SV-<br>AS03) | G1<br>(SV-<br>PBS) | G2<br>(SV-<br>AS03) | G2<br>(SV-<br>PBS) | V1<br>(SV-<br>AS03) | V1<br>(SV-<br>PBS) | V2<br>(SV-<br>AS03) | V2<br>(SV-<br>PBS) | V1+V2<br>(SV-<br>AS03) | V1+V2<br>(SV-<br>PBS) |
|-----------------|---------------|---------------------|--------------------|---------------------|--------------------|---------------------|--------------------|---------------------|--------------------|------------------------|-----------------------|
| ENSG00000156113 | KCNMA1        | 0.97                |                    | 0.05                |                    | 94.3                |                    | 0.3                 |                    | 94.5                   |                       |
| ENSG00000050628 | PTGER3        | -0.92               |                    | 0.24                |                    | 84.4                |                    | 5.9                 |                    | 90.2                   |                       |
| ENSG00000115594 | IL1R1         | -0.93               |                    | 0.16                |                    | 87.3                |                    | 2.6                 |                    | 89.9                   |                       |
| ENSG00000229754 | CXCR2P1       | 0.93                |                    | -0.16               |                    | 85.7                |                    | 2.5                 |                    | 88.2                   |                       |
| ENSG00000173369 | C1QB          | 0.93                |                    | 0.13                |                    | 86.3                |                    | 1.8                 |                    | 88.1                   |                       |
| ENSG00000138646 | HERC5         | 0.93                |                    | -0.11               |                    | 85.6                |                    | 1.2                 |                    | 86.8                   |                       |
| ENSG00000169994 | MYO7B         | 0.89                |                    | -0.15               |                    | 80.0                |                    | 2.2                 |                    | 82.3                   |                       |
| ENSG00000026751 | SLAMF7        | 0.90                |                    | -0.08               |                    | 80.9                |                    | 0.7                 |                    | 81.5                   |                       |
| ENSG00000187608 | ISG15         | 0.90                |                    | 0.07                |                    | 80.4                |                    | 0.5                 |                    | 81.0                   |                       |
| ENSG00000185745 | IFIT1         | 0.89                |                    | -0.09               |                    | 79.9                |                    | 0.8                 |                    | 80.7                   |                       |
| ENSG00000166278 | C2            | 0.86                |                    | -0.23               |                    | 74.5                |                    | 5.3                 |                    | 79.8                   |                       |
| ENSG00000126262 | FFAR2         | 0.87                |                    | 0.14                |                    | 75.9                |                    | 1.9                 |                    | 77.8                   |                       |
| ENSG00000135114 | OASL          | 0.88                |                    | -0.02               |                    | 76.9                |                    | 0.1                 |                    | 77.0                   |                       |
| ENSG00000225886 | RP11-288L9.4  | 0.80                |                    | 0.32                |                    | 64.6                |                    | 10.3                |                    | 74.9                   |                       |
| ENSG00000133321 | RARRES3       | 0.86                |                    | -0.03               |                    | 74.6                |                    | 0.1                 |                    | 74.7                   |                       |
| ENSG00000168899 | VAMP5         | 0.85                |                    | -0.13               |                    | 72.9                |                    | 1.7                 |                    | 74.6                   |                       |
| ENSG00000126709 | IFI6          | 0.85                |                    | -0.16               |                    | 72.1                |                    | 2.4                 |                    | 74.5                   |                       |
| ENSG00000115590 | IL1R2         | -0.83               |                    | 0.25                |                    | 68.4                |                    | 6.1                 |                    | 74.5                   |                       |
| ENSG00000064300 | NGFR          | 0.85                |                    | -0.09               |                    | 73.0                |                    | 0.8                 |                    | 73.9                   |                       |
| ENSG00000165806 | CASP7         | 0.85                |                    | -0.12               |                    | 72.4                |                    | 1.4                 |                    | 73.8                   |                       |
| ENSG00000166444 | ST5           | -0.85               |                    | 0.08                |                    | 72.9                |                    | 0.6                 |                    | 73.4                   |                       |
| ENSG00000111335 | OAS2          | 0.86                |                    | -0.04               |                    | 73.2                |                    | 0.2                 |                    | 73.4                   |                       |
| ENSG00000185885 | IFITM1        | 0.85                |                    | 0.06                |                    | 72.8                |                    | 0.3                 |                    | 73.2                   |                       |
| ENSG00000135636 | DYSF          | 0.82                |                    | -0.22               |                    | 67.7                |                    | 4.7                 |                    | 72.4                   |                       |
| ENSG00000188282 | RUFY4         | 0.85                |                    | 0.04                |                    | 72.0                |                    | 0.1                 |                    | 72.1                   |                       |
| ENSG00000125148 | MT2A          | 0.84                |                    | 0.09                |                    | 69.9                |                    | 0.8                 |                    | 70.7                   |                       |
| ENSG00000025708 | TYMP          | 0.83                |                    | -0.08               |                    | 69.7                |                    | 0.7                 |                    | 70.4                   |                       |
| ENSG00000218537 | AP000350.4    | -0.60               |                    | 0.59                |                    | 35.5                |                    | 34.5                |                    | 70.0                   |                       |
| ENSG00000007129 | CEACAM21      | 0.80                |                    | -0.23               |                    | 64.4                |                    | 5.3                 |                    | 69.7                   |                       |
| ENSG00000100911 | PSME2         | 0.80                |                    | -0.21               |                    | 64.2                |                    | 4.6                 |                    | 68.8                   |                       |
| ENSG00000111181 | SLC6A12       | 0.82                |                    | 0.10                |                    | 67.5                |                    | 1.0                 |                    | 68.5                   |                       |
| ENSG00000163568 | AIM2          | 0.78                |                    | -0.28               |                    | 60.3                |                    | 8.1                 |                    | 68.4                   |                       |
| ENSG00000147408 | CSGALNACT1    | -0.69               |                    | -0.45               |                    | 47.4                |                    | 20.1                |                    | 67.5                   |                       |
| ENSG00000233355 | RP11-343J24.1 | -0.81               |                    | -0.15               |                    | 64.9                |                    | 2.2                 |                    | 67.2                   |                       |
| ENSG00000131203 | IDO1          | 0.78                |                    | 0.22                |                    | 61.2                |                    | 4.9                 |                    | 66.2                   |                       |
| ENSG00000119917 | IFIT3         | 0.80                |                    | -0.06               |                    | 64.3                |                    | 0.4                 |                    | 64.7                   |                       |
| ENSG00000172183 | ISG20         | 0.80                |                    | 0.04                |                    | 64.5                |                    | 0.1                 |                    | 64.6                   |                       |
| ENSG00000149131 | SERPING1      | 0.79                |                    | -0.16               |                    | 62.0                |                    | 2.5                 |                    | 64.6                   |                       |
| ENSG00000137628 | DDX60         | 0.77                |                    | -0.23               |                    | 59.2                |                    | 5.4                 |                    | 64.5                   |                       |
| ENSG00000121858 | TNFSF10       | 0.79                |                    | -0.12               |                    | 62.7                |                    | 1.4                 |                    | 64.1                   |                       |
| ENSG00000137965 | IFI44         | 0.78                |                    | -0.19               |                    | 60.1                |                    | 3.6                 |                    | 63.7                   |                       |
| ENSG00000137959 | IFI44L        | 0.78                |                    | -0.17               |                    | 60.6                |                    | 3.0                 |                    | 63.6                   |                       |
| ENSG00000119922 | IFIT2         | 0.78                |                    | -0.17               |                    | 60.6                |                    | 2.9                 |                    | 63.5                   |                       |
| ENSG00000253882 | RP11-61L23.2  | 0.79                |                    | -0.01               |                    | 63.1                |                    | 0.0                 |                    | 63.1                   |                       |
| ENSG00000130489 | SCO2          | 0.79                |                    | -0.06               |                    | 62.7                |                    | 0.4                 |                    | 63.0                   |                       |
| ENSG00000198829 | SUCNR1        | 0.77                |                    | -0.21               |                    | 58.6                |                    | 4.4                 |                    | 63.0                   |                       |
| ENSG00000137193 | PIM1          | 0.78                |                    | 0.12                |                    | 61.6                |                    | 1.5                 |                    | 63.0                   |                       |
| ENSG00000020577 | SAMD4A        | 0.79                |                    | -0.04               |                    | 62.8                |                    | 0.2                 |                    | 63.0                   |                       |
| ENSG00000100342 | APOL1         | 0.79                |                    | -0.09               |                    | 62.1                |                    | 0.8                 |                    | 62.9                   |                       |
| ENSG00000159189 | C1QC          | 0.78                |                    | -0.12               |                    | 60.7                |                    | 1.4                 |                    | 62.1                   |                       |
| ENSG00000238000 | RP11-274E7.2  | 0.65                |                    | -0.45               |                    | 41.6                |                    | 20.3                |                    | 62.0                   |                       |

| Gene ID         | Gene Name    | G1<br>(SV-<br>AS03) | G1<br>(SV-<br>PBS) | G2<br>(SV-<br>AS03) | G2<br>(SV-<br>PBS) | V1<br>(SV-<br>AS03) | V1<br>(SV-<br>PBS) | V2<br>(SV-<br>AS03) | V2<br>(SV-<br>PBS) | V1+V2<br>(SV-<br>AS03) | V1+V2<br>(SV-<br>PBS) |
|-----------------|--------------|---------------------|--------------------|---------------------|--------------------|---------------------|--------------------|---------------------|--------------------|------------------------|-----------------------|
| ENSG00000111331 | OAS3         | 0.78                |                    | -0.10               |                    | 60.8                |                    | 1.1                 |                    | 61.9                   |                       |
| ENSG00000172159 | FRMD3        | 0.78                |                    | -0.10               |                    | 60.6                |                    | 1.0                 |                    | 61.6                   |                       |
| ENSG00000173821 | RNF213       | 0.76                |                    | -0.18               |                    | 58.2                |                    | 3.2                 |                    | 61.4                   |                       |
| ENSG00000145287 | PLAC8        | 0.75                |                    | -0.23               |                    | 56.0                |                    | 5.4                 |                    | 61.4                   |                       |
| ENSG00000240065 | PSMB9        | 0.77                |                    | -0.07               |                    | 60.0                |                    | 0.5                 |                    | 60.5                   |                       |
| ENSG00000165178 | NCF1C        | 0.78                |                    | -0.04               |                    | 60.3                |                    | 0.2                 |                    | 60.5                   |                       |
| ENSG00000068079 | IFI35        | 0.78                |                    | 0.03                |                    | 60.3                |                    | 0.1                 |                    | 60.4                   |                       |
| ENSG00000101017 | CD40         | 0.77                |                    | -0.08               |                    | 59.7                |                    | 0.6                 |                    | 60.3                   |                       |
| ENSG00000177409 | SAMD9L       | 0.74                |                    | -0.24               |                    | 54.3                |                    | 5.8                 |                    | 60.1                   |                       |
| ENSG00000165092 | ALDH1A1      | 0.71                |                    | 0.32                |                    | 49.8                |                    | 10.1                |                    | 59.9                   |                       |
| ENSG00000204267 | TAP2         | 0.75                |                    | -0.18               |                    | 56.4                |                    | 3.1                 |                    | 59.5                   |                       |
| ENSG00000163736 | PPBP         | -0.08               |                    | -0.77               |                    | 0.7                 |                    | 58.8                |                    | 59.5                   |                       |
| ENSG00000204060 | FOXO6        | -0.53               |                    | 0.56                |                    | 28.2                |                    | 31.3                |                    | 59.4                   |                       |
| ENSG00000152766 | ANKRD22      | 0.76                |                    | -0.11               |                    | 57.9                |                    | 1.3                 |                    | 59.2                   |                       |
| ENSG00000169245 | CXCL10       | 0.77                |                    | 0.04                |                    | 58.9                |                    | 0.1                 |                    | 59.1                   |                       |
| ENSG00000158517 | NCF1         | 0.76                |                    | -0.09               |                    | 58.0                |                    | 0.9                 |                    | 58.9                   |                       |
| ENSG00000183734 | ASCL2        | 0.76                |                    | -0.09               |                    | 57.6                |                    | 0.8                 |                    | 58.3                   |                       |
| ENSG00000157601 | MX1          | 0.76                |                    | -0.06               |                    | 57.7                |                    | 0.4                 |                    | 58.1                   |                       |
| ENSG00000198959 | TGM2         | 0.72                |                    | -0.25               |                    | 51.4                |                    | 6.4                 |                    | 57.9                   |                       |
| ENSG00000142089 | IFITM3       | 0.76                |                    | -0.07               |                    | 57.1                |                    | 0.5                 |                    | 57.7                   |                       |
| ENSG00000162654 | GBP4         | 0.74                |                    | -0.15               |                    | 54.4                |                    | 2.3                 |                    | 56.8                   |                       |
| ENSG00000177989 | ODF3B        | 0.74                |                    | -0.13               |                    | 54.1                |                    | 1.8                 |                    | 55.9                   |                       |
| ENSG00000255760 | RP11-428G5.5 | 0.64                |                    | -0.39               |                    | 40.4                |                    | 15.1                |                    | 55.5                   |                       |
| ENSG00000124256 | ZBP1         | 0.74                |                    | 0.00                |                    | 55.1                |                    | 0.0                 |                    | 55.1                   |                       |
| ENSG00000197506 | SLC28A3      | -0.73               |                    | -0.12               |                    | 53.6                |                    | 1.4                 |                    | 55.0                   |                       |
| ENSG00000128284 | APOL3        | 0.71                |                    | -0.21               |                    | 50.4                |                    | 4.6                 |                    | 55.0                   |                       |
| ENSG00000182487 | NCF1B        | 0.73                |                    | -0.11               |                    | 53.4                |                    | 1.2                 |                    | 54.6                   |                       |
| ENSG00000136514 | RTP4         | 0.72                |                    | 0.13                |                    | 52.4                |                    | 1.8                 |                    | 54.2                   |                       |
| ENSG00000156587 | UBE2L6       | 0.72                |                    | -0.13               |                    | 52.5                |                    | 1.6                 |                    | 54.1                   |                       |
| ENSG00000100276 | RASL10A      | -0.64               |                    | -0.35               |                    | 41.5                |                    | 12.1                |                    | 53.6                   |                       |
| ENSG00000132530 | XAF1         | 0.72                |                    | -0.12               |                    | 52.1                |                    | 1.5                 |                    | 53.6                   |                       |
| ENSG00000117226 | GBP3         | 0.68                |                    | -0.26               |                    | 46.4                |                    | 6.9                 |                    | 53.3                   |                       |
| ENSG00000162645 | GBP2         | 0.72                |                    | -0.12               |                    | 51.8                |                    | 1.4                 |                    | 53.1                   |                       |
| ENSG00000128335 | APOL2        | 0.70                |                    | -0.20               |                    | 49.1                |                    | 4.1                 |                    | 53.1                   |                       |
| ENSG00000140105 | WARS         | 0.72                |                    | -0.11               |                    | 51.9                |                    | 1.2                 |                    | 53.1                   |                       |
| ENSG00000162512 | SDC3         | 0.71                |                    | -0.18               |                    | 49.8                |                    | 3.2                 |                    | 53.0                   |                       |
| ENSG00000198019 | FCGR1B       | 0.73                |                    | 0.02                |                    | 52.7                |                    | 0.0                 |                    | 52.8                   |                       |
| ENSG00000108679 | LGALS3BP     | 0.71                |                    | -0.15               |                    | 50.4                |                    | 2.2                 |                    | 52.6                   |                       |
| ENSG00000148175 | STOM         | 0.70                |                    | -0.16               |                    | 49.6                |                    | 2.6                 |                    | 52.3                   |                       |
| ENSG00000154188 | ANGPT1       | -0.52               |                    | -0.50               |                    | 26.8                |                    | 25.4                |                    | 52.2                   |                       |
| ENSG00000163412 | EIF4E3       | 0.68                |                    | -0.25               |                    | 46.1                |                    | 6.1                 |                    | 52.2                   |                       |
| ENSG00000133106 | EPSTI1       | 0.69                |                    | -0.22               |                    | 47.1                |                    | 4.9                 |                    | 52.0                   |                       |
| ENSG00000118557 | PMFBP1       | -0.26               |                    | 0.67                |                    | 7.0                 |                    | 44.8                |                    | 51.8                   |                       |
| ENSG00000256948 | RP11-598F7.3 | 0.47                |                    | -0.54               |                    | 22.0                |                    | 29.7                |                    | 51.7                   |                       |
| ENSG00000170581 | STAT2        | 0.71                |                    | -0.11               |                    | 50.0                |                    | 1.3                 |                    | 51.3                   |                       |
| ENSG00000179044 | EXOC3L1      | 0.71                |                    | -0.00               |                    | 50.8                |                    | 0.0                 |                    | 50.8                   |                       |
| ENSG00000168062 | BATF2        | 0.71                |                    | -0.06               |                    | 50.4                |                    | 0.3                 |                    | 50.7                   |                       |
| ENSG00000143801 | PSEN2        | 0.70                |                    | -0.11               |                    | 49.6                |                    | 1.1                 |                    | 50.7                   |                       |
| ENSG00000221955 | SLC12A8      | 0.71                |                    | 0.03                |                    | 50.4                |                    | 0.1                 |                    | 50.5                   |                       |
| ENSG00000253981 | RP11-556O5.4 | -0.66               |                    | -0.26               |                    | 43.5                |                    | 6.7                 |                    | 50.2                   |                       |
| ENSG00000154451 | GBP5         | 0.70                |                    | -0.10               |                    | 48.9                |                    | 1.0                 |                    | 49.9                   |                       |



| Gene ID         | Gene Name    | G1<br>(SV-<br>AS03) | G1<br>(SV-<br>PBS) | G2<br>(SV-<br>AS03) | G2<br>(SV-<br>PBS) | V1<br>(SV-<br>AS03) | V1<br>(SV-<br>PBS) | V2<br>(SV-<br>AS03) | V2<br>(SV-<br>PBS) | V1+V2<br>(SV-<br>AS03) | V1+V2<br>(SV-<br>PBS) |
|-----------------|--------------|---------------------|--------------------|---------------------|--------------------|---------------------|--------------------|---------------------|--------------------|------------------------|-----------------------|
| ENSG00000176358 | TAC4         | 0.60                |                    | -0.37               |                    | 35.8                |                    | 13.5                |                    | 49.2                   |                       |
| ENSG00000138496 | PARP9        | 0.68                |                    | -0.15               |                    | 46.6                |                    | 2.4                 |                    | 49.0                   |                       |
| ENSG00000100453 | GZMB         | -0.44               |                    | 0.54                |                    | 19.5                |                    | 29.4                |                    | 48.9                   |                       |
| ENSG00000173193 | PARP14       | 0.66                |                    | -0.24               |                    | 43.1                |                    | 5.8                 |                    | 48.9                   |                       |
| ENSG00000185507 | IRF7         | 0.70                |                    | 0.04                |                    | 48.6                |                    | 0.1                 |                    | 48.8                   |                       |
| ENSG00000256262 | RP11-117B7.1 | 0.64                |                    | -0.27               |                    | 41.3                |                    | 7.2                 |                    | 48.4                   |                       |
| ENSG00000167371 | PRRT2        | 0.69                |                    | -0.09               |                    | 47.6                |                    | 0.7                 |                    | 48.3                   |                       |
| ENSG00000104970 | KIR3DX1      | 0.67                |                    | 0.19                |                    | 44.2                |                    | 3.4                 |                    | 47.7                   |                       |
| ENSG00000120217 | CD274        | 0.64                |                    | -0.25               |                    | 41.4                |                    | 6.3                 |                    | 47.7                   |                       |
| ENSG00000130487 | KLHDC7B      | 0.68                |                    | -0.04               |                    | 46.6                |                    | 0.2                 |                    | 46.7                   |                       |
| ENSG00000221963 | APOL6        | 0.67                |                    | -0.15               |                    | 44.4                |                    | 2.3                 |                    | 46.7                   |                       |
| ENSG00000117228 | GBP1         | 0.67                |                    | -0.12               |                    | 44.6                |                    | 1.4                 |                    | 46.0                   |                       |
| ENSG00000115415 | STAT1        | 0.63                |                    | -0.26               |                    | 39.1                |                    | 6.8                 |                    | 45.9                   |                       |
| ENSG00000163840 | DTX3L        | 0.64                |                    | -0.19               |                    | 41.3                |                    | 3.5                 |                    | 44.8                   |                       |
| ENSG00000203734 | ECT2L        | -0.05               |                    | -0.67               |                    | 0.2                 |                    | 44.4                |                    | 44.6                   |                       |
| ENSG00000225492 | GBP1P1       | 0.65                |                    | -0.15               |                    | 42.3                |                    | 2.1                 |                    | 44.5                   |                       |
| ENSG00000203814 | HIST2H2BF    | 0.64                |                    | -0.17               |                    | 41.2                |                    | 3.0                 |                    | 44.2                   |                       |
| ENSG00000225131 | PSME2P2      | 0.63                |                    | -0.20               |                    | 39.4                |                    | 4.1                 |                    | 43.5                   |                       |
| ENSG00000129673 | AANAT        | 0.64                |                    | -0.17               |                    | 40.5                |                    | 2.9                 |                    | 43.4                   |                       |
| ENSG00000134321 | RSAD2        | 0.64                |                    | -0.15               |                    | 40.5                |                    | 2.4                 |                    | 42.9                   |                       |
| ENSG00000136960 | ENPP2        | 0.64                |                    | 0.12                |                    | 41.4                |                    | 1.4                 |                    | 42.8                   |                       |
| ENSG00000089169 | RPH3A        | -0.61               |                    | 0.24                |                    | 36.8                |                    | 5.7                 |                    | 42.5                   |                       |
| ENSG00000002549 | LAP3         | 0.65                |                    | -0.04               |                    | 42.1                |                    | 0.2                 |                    | 42.3                   |                       |
| ENSG00000136867 | SLC31A2      | 0.64                |                    | -0.09               |                    | 41.1                |                    | 0.8                 |                    | 41.9                   |                       |
| ENSG00000180739 | S1PR5        | -0.21               |                    | 0.61                |                    | 4.6                 |                    | 37.2                |                    | 41.8                   |                       |
| ENSG00000186187 | ZNRF1        | -0.62               |                    | 0.18                |                    | 38.2                |                    | 3.3                 |                    | 41.5                   |                       |
| ENSG00000247275 | AL160008.1   | 0.64                |                    | 0.06                |                    | 40.8                |                    | 0.4                 |                    | 41.1                   |                       |
| ENSG00000125347 | IRF1         | 0.63                |                    | -0.12               |                    | 39.5                |                    | 1.5                 |                    | 41.0                   |                       |
| ENSG00000197121 | PGAP1        | 0.63                |                    | -0.10               |                    | 39.8                |                    | 1.1                 |                    | 40.8                   |                       |
| ENSG00000198719 | DLL1         | 0.63                |                    | 0.05                |                    | 40.1                |                    | 0.3                 |                    | 40.3                   |                       |
| ENSG00000055130 | CUL1         | 0.63                |                    | 0.03                |                    | 40.2                |                    | 0.1                 |                    | 40.2                   |                       |
| ENSG00000150337 | FCGR1A       | 0.63                |                    | -0.04               |                    | 39.9                |                    | 0.2                 |                    | 40.1                   |                       |
| ENSG00000168394 | TAP1         | 0.62                |                    | -0.10               |                    | 39.0                |                    | 1.0                 |                    | 40.0                   |                       |
| ENSG00000010030 | ETV7         | 0.60                |                    | -0.21               |                    | 35.5                |                    | 4.5                 |                    | 40.0                   |                       |
| ENSG00000214872 | SMTNL1       | 0.63                |                    | -0.01               |                    | 39.9                |                    | 0.0                 |                    | 39.9                   |                       |
| ENSG00000159674 | SPON2        | -0.13               |                    | 0.61                |                    | 1.8                 |                    | 36.7                |                    | 38.5                   |                       |
| ENSG00000116663 | FBXO6        | 0.62                |                    | 0.00                |                    | 38.2                |                    | 0.0                 |                    | 38.2                   |                       |
| ENSG00000234518 | RP5-837D10.2 | 0.62                |                    | -0.01               |                    | 38.1                |                    | 0.0                 |                    | 38.1                   |                       |
| ENSG00000164684 | ZNF704       | -0.59               |                    | 0.16                |                    | 35.0                |                    | 2.7                 |                    | 37.7                   |                       |
| ENSG00000134326 | CMPK2        | 0.61                |                    | -0.04               |                    | 37.5                |                    | 0.2                 |                    | 37.6                   |                       |
| ENSG00000243649 | CFB          | 0.61                |                    | 0.03                |                    | 37.0                |                    | 0.1                 |                    | 37.1                   |                       |
| ENSG00000224083 | RP11-39K24.4 | 0.21                |                    | -0.56               |                    | 4.6                 |                    | 31.3                |                    | 35.9                   |                       |
| ENSG00000236254 | RP11-39K24.8 | 0.27                |                    | -0.53               |                    | 7.1                 |                    | 27.6                |                    | 34.7                   |                       |
| ENSG00000111186 | WNT5B        | -0.58               |                    | -0.09               |                    | 33.9                |                    | 0.8                 |                    | 34.7                   |                       |
| ENSG00000168497 | SDPR         | -0.13               |                    | -0.57               |                    | 1.7                 |                    | 32.8                |                    | 34.5                   |                       |
| ENSG00000121966 | CXCR4        | -0.53               |                    | 0.24                |                    | 28.3                |                    | 5.8                 |                    | 34.1                   |                       |
| ENSG00000140511 | HAPLN3       | 0.58                |                    | -0.02               |                    | 33.8                |                    | 0.0                 |                    | 33.9                   |                       |
| ENSG00000169255 | B3GALNT1     | -0.11               |                    | 0.57                |                    | 1.1                 |                    | 32.5                |                    | 33.7                   |                       |
| ENSG00000183762 | KREMEN1      | 0.57                |                    | 0.11                |                    | 32.4                |                    | 1.2                 |                    | 33.6                   |                       |
| ENSG00000237989 | AP001046.5   | 0.58                |                    | 0.05                |                    | 33.1                |                    | 0.3                 |                    | 33.3                   |                       |
| ENSG00000140853 | NLRC5        | 0.56                |                    | -0.15               |                    | 31.0                |                    | 2.3                 |                    | 33.3                   |                       |

| Gene ID         | Gene Name     | G1<br>(SV-<br>AS03) | G1<br>(SV-<br>PBS) | G2<br>(SV-<br>AS03) | G2<br>(SV-<br>PBS) | V1<br>(SV-<br>AS03) | V1<br>(SV-<br>PBS) | V2<br>(SV-<br>AS03) | V2<br>(SV-<br>PBS) | V1+V2<br>(SV-<br>AS03) | V1+V2<br>(SV-<br>PBS) |
|-----------------|---------------|---------------------|--------------------|---------------------|--------------------|---------------------|--------------------|---------------------|--------------------|------------------------|-----------------------|
| ENSG00000240710 | RP11-430C7.4  | 0.54                |                    | -0.20               |                    | 29.4                |                    | 3.8                 |                    | 33.3                   |                       |
| ENSG00000145555 | MYO10         | -0.57               |                    | 0.07                |                    | 32.1                |                    | 0.4                 |                    | 32.6                   |                       |
| ENSG00000175084 | DES           | 0.53                |                    | -0.20               |                    | 28.3                |                    | 4.2                 |                    | 32.4                   |                       |
| ENSG00000162614 | NEXN          | 0.42                |                    | -0.37               |                    | 17.9                |                    | 13.6                |                    | 31.5                   |                       |
| ENSG00000181036 | FCRL6         | 0.39                |                    | 0.38                |                    | 15.1                |                    | 14.4                |                    | 29.6                   |                       |
| ENSG00000100336 | APOL4         | 0.54                |                    | -0.07               |                    | 28.6                |                    | 0.5                 |                    | 29.1                   |                       |
| ENSG00000158156 | XKR8          | 0.53                |                    | 0.12                |                    | 27.7                |                    | 1.3                 |                    | 29.1                   |                       |
| ENSG00000004468 | CD38          | 0.54                |                    | 0.04                |                    | 28.8                |                    | 0.1                 |                    | 28.9                   |                       |
| ENSG00000179388 | EGR3          | 0.27                |                    | 0.45                |                    | 7.5                 |                    | 20.1                |                    | 27.6                   |                       |
| ENSG00000206942 | SNORA9_206942 | -0.52               |                    | -0.02               |                    | 27.5                |                    | 0.0                 |                    | 27.5                   |                       |
| ENSG00000180644 | PRF1          | -0.15               |                    | 0.50                |                    | 2.1                 |                    | 24.8                |                    | 27.0                   |                       |
| ENSG00000214076 | CPSF1P1       | -0.16               |                    | 0.49                |                    | 2.6                 |                    | 24.2                |                    | 26.8                   |                       |
| ENSG00000167779 | IGFBP6        | -0.47               |                    | 0.22                |                    | 22.0                |                    | 4.7                 |                    | 26.7                   |                       |
| ENSG00000120586 | MRC1          | -0.07               |                    | 0.51                |                    | 0.5                 |                    | 25.7                |                    | 26.2                   |                       |
| ENSG00000141854 | AC022098.1    | -0.26               |                    | 0.44                |                    | 6.6                 |                    | 19.3                |                    | 25.9                   |                       |
| ENSG00000169184 | MN1           | -0.50               |                    | -0.02               |                    | 25.1                |                    | 0.0                 |                    | 25.2                   |                       |
| ENSG00000233029 | RP11-439A17.9 | 0.47                |                    | -0.17               |                    | 22.1                |                    | 2.8                 |                    | 24.9                   |                       |
| ENSG00000196436 | NPIPL2        | -0.18               |                    | 0.46                |                    | 3.3                 |                    | 21.5                |                    | 24.8                   |                       |
| ENSG00000100385 | IL2RB         | -0.40               |                    | 0.29                |                    | 16.2                |                    | 8.6                 |                    | 24.8                   |                       |
| ENSG00000130720 | FIBCD1        | -0.27               |                    | 0.41                |                    | 7.6                 |                    | 16.9                |                    | 24.5                   |                       |
| ENSG00000145685 | LHFPL2        | 0.42                |                    | -0.26               |                    | 17.5                |                    | 6.9                 |                    | 24.5                   |                       |
| ENSG00000138378 | STAT4         | -0.08               |                    | 0.49                |                    | 0.6                 |                    | 23.5                |                    | 24.1                   |                       |
| ENSG00000219607 | PPP1R3G       | -0.45               |                    | -0.20               |                    | 19.9                |                    | 4.1                 |                    | 24.0                   |                       |
| ENSG00000162433 | AK4           | 0.42                |                    | 0.25                |                    | 17.9                |                    | 6.0                 |                    | 23.9                   |                       |
| ENSG00000228060 | RP11-15J6.1   | -0.10               |                    | -0.47               |                    | 0.9                 |                    | 22.5                |                    | 23.4                   |                       |
| ENSG00000099250 | NRP1          | -0.36               |                    | -0.32               |                    | 12.7                |                    | 10.5                |                    | 23.2                   |                       |
| ENSG00000205084 | TMEM231       | -0.47               |                    | 0.00                |                    | 22.4                |                    | 0.0                 |                    | 22.4                   |                       |
| ENSG00000162772 | ATF3          | 0.42                |                    | -0.22               |                    | 17.6                |                    | 4.7                 |                    | 22.3                   |                       |
| ENSG00000130300 | PLVAP         | -0.46               |                    | -0.09               |                    | 21.5                |                    | 0.7                 |                    | 22.2                   |                       |
| ENSG00000167550 | RHEBL1        | 0.34                |                    | -0.32               |                    | 11.7                |                    | 10.2                |                    | 21.8                   |                       |
| ENSG00000073861 | TBX21         | -0.45               |                    | 0.13                |                    | 20.0                |                    | 1.7                 |                    | 21.7                   |                       |
| ENSG00000158714 | SLAMF8        | 0.45                |                    | 0.11                |                    | 20.3                |                    | 1.2                 |                    | 21.4                   |                       |
| ENSG00000203818 | HIST2H3PS2    | 0.19                |                    | 0.42                |                    | 3.7                 |                    | 17.6                |                    | 21.3                   |                       |
| ENSG00000074181 | NOTCH3        | -0.41               |                    | 0.20                |                    | 16.6                |                    | 4.0                 |                    | 20.5                   |                       |
| ENSG00000235750 | KIAA0040      | 0.45                |                    | -0.02               |                    | 20.3                |                    | 0.0                 |                    | 20.3                   |                       |
| ENSG00000120738 | EGR1          | -0.44               |                    | 0.10                |                    | 19.2                |                    | 0.9                 |                    | 20.1                   |                       |
| ENSG00000067057 | PFKP          | 0.44                |                    | -0.05               |                    | 19.5                |                    | 0.3                 |                    | 19.7                   |                       |
| ENSG00000252331 | AP002812.1    | 0.14                |                    | -0.42               |                    | 2.0                 |                    | 17.4                |                    | 19.4                   |                       |
| ENSG00000231528 | NCRNA00256A   | 0.41                |                    | -0.16               |                    | 16.7                |                    | 2.6                 |                    | 19.3                   |                       |
| ENSG00000230225 | RP11-39K24.15 | -0.17               |                    | -0.40               |                    | 2.8                 |                    | 16.3                |                    | 19.1                   |                       |
| ENSG00000249835 | CTC-348L14.1  | -0.44               |                    | -0.03               |                    | 19.0                |                    | 0.1                 |                    | 19.1                   |                       |
| ENSG00000248201 | RP4-671G15.3  | -0.40               |                    | -0.16               |                    | 16.4                |                    | 2.7                 |                    | 19.0                   |                       |
| ENSG00000139211 | AMIGO2        | 0.34                |                    | -0.27               |                    | 11.5                |                    | 7.3                 |                    | 18.8                   |                       |
| ENSG00000131355 | EMR3          | -0.43               |                    | -0.07               |                    | 18.1                |                    | 0.4                 |                    | 18.5                   |                       |
| ENSG00000227028 | AC007254.3    | 0.37                |                    | -0.20               |                    | 13.9                |                    | 3.9                 |                    | 17.8                   |                       |
| ENSG00000160183 | TMPRSS3       | 0.11                |                    | 0.39                |                    | 1.3                 |                    | 15.0                |                    | 16.4                   |                       |
| ENSG00000173762 | CD7           | 0.20                |                    | 0.35                |                    | 4.0                 |                    | 12.4                |                    | 16.3                   |                       |
| ENSG00000224875 | AC083949.1    | 0.31                |                    | -0.26               |                    | 9.5                 |                    | 6.7                 |                    | 16.2                   |                       |
| ENSG00000113368 | LMNB1         | 0.38                |                    | 0.08                |                    | 14.5                |                    | 0.7                 |                    | 15.2                   |                       |
| ENSG00000235865 | C9orf31       | -0.36               |                    | -0.15               |                    | 12.9                |                    | 2.3                 |                    | 15.2                   |                       |
| ENSG00000131187 | F12           | -0.37               |                    | -0.10               |                    | 13.7                |                    | 0.9                 |                    | 14.6                   |                       |

| Gene ID         | Gene Name     | G1<br>(SV-<br>AS03) | G1<br>(SV-<br>PBS) | G2<br>(SV-<br>AS03) | G2<br>(SV-<br>PBS) | V1<br>(SV-<br>AS03) | V1<br>(SV-<br>PBS) | V2<br>(SV-<br>AS03) | V2<br>(SV-<br>PBS) | V1+V2<br>(SV-<br>AS03) | V1+V2<br>(SV-<br>PBS) |
|-----------------|---------------|---------------------|--------------------|---------------------|--------------------|---------------------|--------------------|---------------------|--------------------|------------------------|-----------------------|
| ENSG00000123689 | G0S2          | -0.32               |                    | -0.19               |                    | 10.5                |                    | 3.7                 |                    | 14.2                   |                       |
| ENSG00000090104 | RGS1          | -0.32               |                    | -0.18               |                    | 10.0                |                    | 3.4                 |                    | 13.3                   |                       |
| ENSG00000139174 | PRICKLE1      | 0.36                |                    | -0.01               |                    | 13.2                |                    | 0.0                 |                    | 13.2                   |                       |
| ENSG00000236567 | RP11-39K24.7  | 0.36                |                    | -0.05               |                    | 12.8                |                    | 0.3                 |                    | 13.1                   |                       |
| ENSG00000069399 | BCL3          | 0.32                |                    | 0.16                |                    | 10.5                |                    | 2.5                 |                    | 13.1                   |                       |
| ENSG00000185499 | MUC1          | 0.32                |                    | -0.16               |                    | 10.5                |                    | 2.5                 |                    | 13.0                   |                       |
| ENSG00000184557 | SOCS3         | 0.33                |                    | -0.12               |                    | 11.0                |                    | 1.5                 |                    | 12.5                   |                       |
| ENSG00000054690 | PLEKHH1       | 0.32                |                    | -0.13               |                    | 10.2                |                    | 1.8                 |                    | 11.9                   |                       |
| ENSG00000254017 | IGHEP2        | 0.32                |                    | -0.14               |                    | 10.0                |                    | 1.8                 |                    | 11.8                   |                       |
| ENSG00000165702 | GFI1B         | 0.01                |                    | -0.34               |                    | 0.0                 |                    | 11.7                |                    | 11.7                   |                       |
| ENSG00000205978 | NYNRIN        | -0.22               |                    | 0.26                |                    | 4.7                 |                    | 6.6                 |                    | 11.2                   |                       |
| ENSG00000164292 | RHOBTB3       | 0.33                |                    | 0.06                |                    | 10.7                |                    | 0.4                 |                    | 11.2                   |                       |
| ENSG00000198520 | C1orf228      | -0.28               |                    | 0.15                |                    | 8.1                 |                    | 2.2                 |                    | 10.3                   |                       |
| ENSG00000183019 | C19orf59      | -0.29               |                    | -0.13               |                    | 8.4                 |                    | 1.8                 |                    | 10.2                   |                       |
| ENSG00000138134 | STAMBPL1      | 0.32                |                    | 0.00                |                    | 10.0                |                    | 0.0                 |                    | 10.0                   |                       |
| ENSG00000110092 | CCND1         | 0.28                |                    | -0.15               |                    | 7.6                 |                    | 2.2                 |                    | 9.8                    |                       |
| ENSG00000231865 | AP000936.3    | 0.23                |                    | -0.19               |                    | 5.4                 |                    | 3.5                 |                    | 8.9                    |                       |
| ENSG00000185950 | IRS2          | -0.28               |                    | 0.11                |                    | 7.6                 |                    | 1.3                 |                    | 8.8                    |                       |
| ENSG00000236790 | NCRNA00299    | -0.24               |                    | 0.17                |                    | 5.8                 |                    | 3.0                 |                    | 8.8                    |                       |
| ENSG00000112299 | VNN1          | -0.16               |                    | 0.25                |                    | 2.4                 |                    | 6.2                 |                    | 8.6                    |                       |
| ENSG00000135074 | ADAM19        | 0.24                |                    | 0.15                |                    | 6.0                 |                    | 2.2                 |                    | 8.2                    |                       |
| ENSG00000145365 | TIFA          | 0.26                |                    | -0.09               |                    | 6.9                 |                    | 0.8                 |                    | 7.8                    |                       |
| ENSG00000183087 | GAS6          | 0.28                |                    | 0.02                |                    | 7.7                 |                    | 0.0                 |                    | 7.8                    |                       |
| ENSG00000156127 | BATF          | 0.24                |                    | -0.15               |                    | 5.6                 |                    | 2.2                 |                    | 7.7                    |                       |
| ENSG00000229436 | AC073850.6    | -0.13               |                    | 0.22                |                    | 1.7                 |                    | 5.0                 |                    | 6.7                    |                       |
| ENSG00000110076 | NRXN2         | 0.00                |                    | -0.24               |                    | 0.0                 |                    | 5.9                 |                    | 5.9                    |                       |
| ENSG00000110944 | IL23A         | 0.17                |                    | 0.16                |                    | 2.9                 |                    | 2.4                 |                    | 5.4                    |                       |
| ENSG00000125869 | C20orf103     | -0.20               |                    | 0.11                |                    | 3.9                 |                    | 1.3                 |                    | 5.2                    |                       |
| ENSG00000166220 | C10orf27      | 0.16                |                    | -0.13               |                    | 2.7                 |                    | 1.6                 |                    | 4.3                    |                       |
| ENSG00000163814 | CDCP1         | 0.20                |                    | 0.01                |                    | 4.1                 |                    | 0.0                 |                    | 4.1                    |                       |
| ENSG00000256049 | PADI6         | -0.10               |                    | 0.11                |                    | 1.1                 |                    | 1.2                 |                    | 2.2                    |                       |
| ENSG00000136630 | HLX           | -0.01               |                    | 0.15                |                    | 0.0                 |                    | 2.1                 |                    | 2.1                    |                       |
| ENSG00000139626 | ITGB7         | -0.02               |                    | 0.14                |                    | 0.1                 |                    | 1.9                 |                    | 2.0                    |                       |
| ENSG00000161647 | MPP3          | -0.12               |                    | -0.06               |                    | 1.4                 |                    | 0.3                 |                    | 1.7                    |                       |
| ENSG00000175505 | CLCF1         | -0.03               |                    | -0.12               |                    | 0.1                 |                    | 1.4                 |                    | 1.5                    |                       |
| ENSG00000143546 | S100A8        | -0.03               |                    | -0.11               |                    | 0.1                 |                    | 1.3                 |                    | 1.3                    |                       |
| ENSG00000169385 | RNASE2        | -0.09               |                    | -0.00               |                    | 0.9                 |                    | 0.0                 |                    | 0.9                    |                       |
| ENSG00000101187 | SLCO4A1       | -0.07               |                    | 0.02                |                    | 0.5                 |                    | 0.0                 |                    | 0.5                    |                       |
| ENSG00000059804 | SLC2A3        | -0.05               |                    | 0.05                |                    | 0.2                 |                    | 0.2                 |                    | 0.5                    |                       |
| ENSG00000154025 | SLC5A10       | 0.03                |                    | 0.04                |                    | 0.1                 |                    | 0.1                 |                    | 0.2                    |                       |
| ENSG00000226067 | RP11-403I13.7 | 0.01                |                    | -0.04               |                    | 0.0                 |                    | 0.1                 |                    | 0.1                    |                       |
| ENSG00000151693 | ASAP2         | 0.03                |                    | 0.00                |                    | 0.1                 |                    | 0.0                 |                    | 0.1                    |                       |

**Table A126:** Canonical loadings and explained variance (RNA-Seq, Dendritic cells, Day 1, Gene variables). Gene variables with at least 25% of explained variance for the first two canonical variates are listed. GX: canonical loadings for canonical variate X, VX: % explained variance for canonical variate X, V1+V2: total % explained variance for both canonical variates. Values for CCA results with a poor cross validation score (< 0.70) are left blank. Sorted by maximum explained variance across treatments (V1+V2).

| IMO Variable   | IMO Variable Name                   | I1<br>(SV-<br>AS03) | I1<br>(SV-<br>PBS) | I2<br>(SV-<br>AS03) | I2<br>(SV-<br>PBS) | V1<br>(SV-<br>AS03) | V1<br>(SV-<br>PBS) | V2<br>(SV-<br>AS03) | V2<br>(SV-<br>PBS) | V1+V2<br>(SV-<br>AS03) | V1+V2<br>(SV-<br>PBS) |
|----------------|-------------------------------------|---------------------|--------------------|---------------------|--------------------|---------------------|--------------------|---------------------|--------------------|------------------------|-----------------------|
| MIP-1 $\alpha$ | Macrophage inflammatory protein     | 0.91                |                    | -0.27               |                    | 82.8                |                    | 7.5                 |                    | 90.3                   |                       |
| TNF            | Tumor necrosis factors              | -0.46               |                    | 0.74                |                    | 21.5                |                    | 55.2                |                    | 76.7                   |                       |
| IL-12p70       | Interleukin-12 p70                  | 0.08                |                    | 0.86                |                    | 0.6                 |                    | 74.8                |                    | 75.4                   |                       |
| IL-10          | Interleukin-10                      | 0.31                |                    | 0.80                |                    | 9.9                 |                    | 64.2                |                    | 74.1                   |                       |
| IL-1 $\beta$   | Interleukin-1 beta                  | 0.54                |                    | 0.66                |                    | 29.1                |                    | 43.2                |                    | 72.3                   |                       |
| IL-6           | Interleukin-6                       | 0.48                |                    | 0.68                |                    | 22.8                |                    | 46.3                |                    | 69.1                   |                       |
| IP-10          | Interferon gamma-induced protein 10 | 0.82                |                    | -0.09               |                    | 67.5                |                    | 0.9                 |                    | 68.4                   |                       |
| Eotaxin-1      | Eotaxin-1                           | -0.66               |                    | 0.13                |                    | 43.3                |                    | 1.8                 |                    | 45.1                   |                       |
| IL-8           | Interleukin-8                       | -0.08               |                    | 0.63                |                    | 0.6                 |                    | 39.6                |                    | 40.2                   |                       |
| MCP-1          | Monocyte chemoattractant protein-1  | 0.08                |                    | 0.37                |                    | 0.7                 |                    | 13.5                |                    | 14.2                   |                       |
| RANTES         | Chemokine (C-C motif) ligand 5      | 0.30                |                    | 0.22                |                    | 9.2                 |                    | 4.7                 |                    | 13.9                   |                       |
| IFN- $\gamma$  | Interferon gamma                    | -0.32               |                    | 0.17                |                    | 10.3                |                    | 2.8                 |                    | 13.0                   |                       |
| Nt             | Microneutralization inhibition      | -0.31               |                    | 0.07                |                    | 9.9                 |                    | 0.5                 |                    | 10.4                   |                       |

**Table A127:** Canonical loadings and explained variance (RNA-Seq, Dendritic cells, Day 1, IMO variables). IMO variables with at least 25% of explained variance for the first two canonical variates are listed. GX: canonical loadings for canonical variate X, VX: % explained variance for canonical variate X, V1+V2: total % explained variance for both canonical variates. Values for CCA results with a poor cross validation score ( $< 0.70$ ) are left blank. Sorted by maximum explained variance across treatments (V1+V2).

| Gene ID         | Gene Name    | G1<br>(SV-<br>AS03) | G1<br>(SV-<br>PBS) | G2<br>(SV-<br>AS03) | G2<br>(SV-<br>PBS) | V1<br>(SV-<br>AS03) | V1<br>(SV-<br>PBS) | V2<br>(SV-<br>AS03) | V2<br>(SV-<br>PBS) | V1+V2<br>(SV-<br>AS03) | V1+V2<br>(SV-<br>PBS) |
|-----------------|--------------|---------------------|--------------------|---------------------|--------------------|---------------------|--------------------|---------------------|--------------------|------------------------|-----------------------|
| ENSG00000188536 | HBA2         | -1.00               | -0.14              | -0.06               | -0.51              | 99.2                | 2.0                | 0.3                 | 26.2               | 99.5                   | 28.2                  |
| ENSG00000244734 | HBB          | -0.99               | -0.43              | 0.11                | -0.34              | 98.1                | 18.2               | 1.1                 | 11.2               | 99.2                   | 29.4                  |
| ENSG00000206172 | HBA1         | -0.99               | -0.52              | 0.05                | -0.36              | 97.5                | 26.7               | 0.2                 | 13.2               | 97.7                   | 39.9                  |
| ENSG00000158856 | EPB49        | -0.24               | 0.40               | 0.82                | -0.15              | 5.6                 | 16.4               | 68.0                | 2.1                | 73.6                   | 18.5                  |
| ENSG00000123689 | G0S2         | -0.04               | -0.44              | 0.83                | 0.13               | 0.2                 | 19.2               | 69.6                | 1.6                | 69.8                   | 20.7                  |
| ENSG00000165092 | ALDH1A1      | -0.57               | -0.55              | 0.58                | 0.33               | 32.7                | 29.8               | 34.1                | 11.1               | 66.8                   | 40.9                  |
| ENSG00000088827 | SIGLEC1      | -0.11               | -0.09              | 0.80                | 0.01               | 1.2                 | 0.9                | 64.5                | 0.0                | 65.7                   | 0.9                   |
| ENSG00000160179 | ABCG1        | 0.31                | -0.79              | 0.26                | 0.16               | 9.6                 | 62.9               | 6.7                 | 2.7                | 16.3                   | 65.6                  |
| ENSG00000165029 | ABCA1        | 0.14                | -0.67              | -0.05               | 0.45               | 2.1                 | 45.0               | 0.3                 | 20.0               | 2.4                    | 65.0                  |
| ENSG00000163568 | AIM2         | -0.32               | -0.49              | 0.71                | 0.52               | 10.2                | 23.9               | 50.9                | 26.9               | 61.1                   | 50.8                  |
| ENSG00000225886 | RP11-288L9.4 | 0.14                | -0.75              | 0.62                | 0.16               | 2.0                 | 56.1               | 38.4                | 2.5                | 40.4                   | 58.6                  |
| ENSG00000125740 | FOSB         | 0.15                | 0.30               | 0.74                | -0.12              | 2.4                 | 8.9                | 54.9                | 1.4                | 57.3                   | 10.3                  |
| ENSG00000213993 | AC092067.1   | -0.73               | -0.17              | 0.01                | -0.25              | 53.3                | 2.8                | 0.0                 | 6.2                | 53.3                   | 9.0                   |
| ENSG00000137959 | IFI44L       | -0.07               | -0.27              | 0.72                | 0.30               | 0.5                 | 7.2                | 51.5                | 8.9                | 52.0                   | 16.1                  |
| ENSG00000235847 | LDHAP7       | -0.67               | -0.33              | 0.26                | -0.35              | 44.4                | 11.0               | 6.5                 | 12.3               | 50.9                   | 23.3                  |
| ENSG00000211899 | IGHM         | 0.16                | -0.62              | 0.56                | -0.35              | 2.6                 | 38.6               | 31.4                | 12.1               | 33.9                   | 50.7                  |
| ENSG00000177807 | KCNJ10       | 0.13                | -0.56              | -0.27               | -0.43              | 1.6                 | 31.1               | 7.1                 | 18.6               | 8.8                    | 49.7                  |
| ENSG00000108679 | LGALS3BP     | -0.09               | -0.05              | 0.70                | 0.03               | 0.8                 | 0.2                | 48.7                | 0.1                | 49.5                   | 0.3                   |
| ENSG00000090104 | RGS1         | 0.03                | 0.29               | 0.70                | -0.07              | 0.1                 | 8.2                | 49.0                | 0.4                | 49.1                   | 8.7                   |
| ENSG00000252331 | AP002812.1   | -0.16               | -0.35              | -0.42               | -0.59              | 2.6                 | 12.5               | 17.8                | 34.7               | 20.4                   | 47.2                  |
| ENSG00000162512 | SDC3         | -0.05               | -0.64              | 0.34                | 0.16               | 0.3                 | 40.9               | 11.8                | 2.5                | 12.1                   | 43.4                  |
| ENSG00000006075 | CCL3         | 0.49                | 0.20               | 0.43                | -0.43              | 23.7                | 4.2                | 18.2                | 18.6               | 41.9                   | 22.8                  |
| ENSG00000152766 | ANKRD22      | 0.07                | -0.52              | 0.42                | 0.38               | 0.5                 | 27.0               | 17.4                | 14.5               | 18.0                   | 41.6                  |
| ENSG00000179750 | APOBEC3B     | -0.21               | -0.62              | 0.60                | 0.13               | 4.5                 | 38.3               | 36.0                | 1.6                | 40.5                   | 39.9                  |
| ENSG00000159189 | C1QC         | -0.47               | -0.39              | 0.39                | 0.50               | 22.1                | 15.5               | 15.1                | 24.8               | 37.2                   | 40.3                  |
| ENSG00000149131 | SERPING1     | -0.28               | -0.54              | 0.56                | 0.14               | 7.8                 | 29.2               | 31.4                | 2.0                | 39.2                   | 31.2                  |
| ENSG00000252197 | AC091047.1   | -0.16               | -0.34              | -0.10               | -0.52              | 2.5                 | 11.6               | 0.9                 | 27.3               | 3.4                    | 38.9                  |

| Gene ID         | Gene Name     | G1<br>(SV-<br>AS03) | G1<br>(SV-<br>PBS) | G2<br>(SV-<br>AS03) | G2<br>(SV-<br>PBS) | V1<br>(SV-<br>AS03) | V1<br>(SV-<br>PBS) | V2<br>(SV-<br>AS03) | V2<br>(SV-<br>PBS) | V1+V2<br>(SV-<br>AS03) | V1+V2<br>(SV-<br>PBS) |
|-----------------|---------------|---------------------|--------------------|---------------------|--------------------|---------------------|--------------------|---------------------|--------------------|------------------------|-----------------------|
| ENSG00000187492 | CDHR4         | 0.58                | -0.01              | -0.22               | -0.06              | 33.2                | 0.0                | 4.7                 | 0.4                | 37.9                   | 0.4                   |
| ENSG00000251826 | AL365332.1    | -0.27               | -0.37              | -0.42               | -0.48              | 7.1                 | 13.9               | 17.6                | 23.4               | 24.7                   | 37.3                  |
| ENSG00000255478 | RP11-867O8.5  | -0.29               | -0.19              | -0.47               | -0.35              | 8.2                 | 3.5                | 22.0                | 12.0               | 30.2                   | 15.4                  |
| ENSG00000120738 | EGR1          | 0.01                | -0.26              | 0.54                | -0.22              | 0.0                 | 6.5                | 29.0                | 4.7                | 29.0                   | 11.2                  |
| ENSG00000173369 | C1QB          | -0.51               | -0.47              | -0.13               | 0.23               | 25.7                | 22.4               | 1.6                 | 5.5                | 27.4                   | 27.8                  |
| ENSG00000252318 | AC097532.1    | -0.29               | -0.21              | -0.16               | -0.48              | 8.5                 | 4.2                | 2.7                 | 23.5               | 11.2                   | 27.7                  |
| ENSG00000185745 | IFIT1         | -0.04               | -0.35              | 0.52                | 0.21               | 0.2                 | 12.2               | 27.3                | 4.4                | 27.5                   | 16.5                  |
| ENSG00000214548 | MEG3          | 0.44                | 0.18               | -0.24               | 0.29               | 19.2                | 3.3                | 5.6                 | 8.4                | 24.7                   | 11.7                  |
| ENSG00000198435 | NRARP         | 0.19                | -0.11              | 0.34                | -0.47              | 3.5                 | 1.2                | 11.5                | 22.4               | 15.0                   | 23.6                  |
| ENSG00000137441 | FGFBP2        | 0.33                | -0.29              | 0.31                | 0.15               | 11.2                | 8.7                | 9.8                 | 2.3                | 21.0                   | 11.0                  |
| ENSG00000235297 | RP11-504H5.1  | 0.04                | -0.29              | -0.08               | -0.35              | 0.1                 | 8.2                | 0.6                 | 12.3               | 0.8                    | 20.4                  |
| ENSG00000237039 | AC018738.2    | -0.11               | -0.23              | 0.13                | -0.38              | 1.3                 | 5.3                | 1.8                 | 14.2               | 3.0                    | 19.6                  |
| ENSG00000223825 | AC079354.4    | 0.15                | -0.20              | 0.23                | -0.37              | 2.3                 | 4.2                | 5.5                 | 13.7               | 7.8                    | 17.9                  |
| ENSG00000253984 | CTD-3056O22.1 | 0.17                | -0.38              | 0.04                | -0.17              | 2.8                 | 14.4               | 0.2                 | 3.0                | 3.0                    | 17.4                  |
| ENSG00000168685 | IL7R          | -0.01               | 0.41               | 0.23                | -0.01              | 0.0                 | 16.5               | 5.5                 | 0.0                | 5.5                    | 16.5                  |
| ENSG00000019169 | MARCO         | -0.11               | -0.33              | 0.39                | -0.00              | 1.1                 | 11.0               | 14.9                | 0.0                | 16.0                   | 11.0                  |
| ENSG00000257531 | RP3-405J10.2  | -0.24               | 0.08               | 0.30                | -0.35              | 5.7                 | 0.6                | 8.8                 | 12.0               | 14.5                   | 12.6                  |
| ENSG00000196656 | AC004057.1    | 0.09                | 0.17               | -0.35               | -0.20              | 0.8                 | 3.0                | 12.5                | 4.0                | 13.3                   | 7.0                   |
| ENSG00000103196 | CRISPLD2      | 0.27                | 0.16               | 0.22                | 0.18               | 7.2                 | 2.7                | 5.0                 | 3.1                | 12.2                   | 5.8                   |
| ENSG00000244479 | RP4-798C17.6  | -0.06               | -0.04              | -0.19               | -0.33              | 0.4                 | 0.2                | 3.6                 | 11.0               | 4.0                    | 11.2                  |
| ENSG00000143416 | SELENBP1      | -0.07               | 0.16               | 0.32                | 0.20               | 0.5                 | 2.4                | 10.2                | 3.8                | 10.8                   | 6.2                   |
| ENSG00000140545 | MFGE8         | 0.18                | -0.04              | 0.25                | -0.11              | 3.1                 | 0.2                | 6.4                 | 1.1                | 9.5                    | 1.3                   |
| ENSG00000230666 | CEACAM22P     | 0.22                | -0.15              | -0.03               | -0.25              | 4.7                 | 2.2                | 0.1                 | 6.1                | 4.8                    | 8.3                   |
| ENSG00000248791 | CTD-2165H16.3 | 0.06                | 0.01               | -0.21               | -0.08              | 0.4                 | 0.0                | 4.5                 | 0.7                | 4.8                    | 0.7                   |
| ENSG00000122877 | EGR2          | -0.15               | 0.16               | 0.04                | 0.08               | 2.3                 | 2.5                | 0.2                 | 0.6                | 2.4                    | 3.2                   |
| ENSG00000203818 | HIST2H3PS2    | -0.05               | -0.17              | 0.16                | -0.05              | 0.2                 | 2.8                | 2.5                 | 0.2                | 2.7                    | 3.0                   |
| ENSG00000160183 | TMPRSS3       | 0.06                | -0.04              | 0.07                | 0.15               | 0.3                 | 0.2                | 0.5                 | 2.1                | 0.9                    | 2.3                   |

**Table A128:** Canonical loadings and explained variance (RNA-Seq, Dendritic cells, Day 3, Gene variables). Gene variables with at least 25% of explained variance for the first two canonical variates are listed. GX: canonical loadings for canonical variate X, VX: % explained variance for canonical variate X, V1+V2: total % explained variance for both canonical variates. Values for CCA results with a poor cross validation score (< 0.70) are left blank. Sorted by maximum explained variance across treatments (V1+V2).

| IMO Vari-<br>able | IMO Variable Name                   | I1<br>(SV-<br>AS03) | I1<br>(SV-<br>PBS) | I2<br>(SV-<br>AS03) | I2<br>(SV-<br>PBS) | V1<br>(SV-<br>AS03) | V1<br>(SV-<br>PBS) | V2<br>(SV-<br>AS03) | V2<br>(SV-<br>PBS) | V1+V2<br>(SV-<br>AS03) | V1+V2<br>(SV-<br>PBS) |
|-------------------|-------------------------------------|---------------------|--------------------|---------------------|--------------------|---------------------|--------------------|---------------------|--------------------|------------------------|-----------------------|
| IL-12p70          | Interleukin-12 p70                  | 0.62                | 0.59               | 0.30                | 0.75               | 38.8                | 34.6               | 9.2                 | 57.0               | 48.0                   | 91.6                  |
| IL-10             | Interleukin-10                      | 0.07                | -0.30              | 0.09                | 0.89               | 0.6                 | 9.0                | 0.8                 | 78.5               | 1.4                    | 87.5                  |
| MIP-1 $\alpha$    | Macrophage inflammatory protein     | 0.11                | -0.88              | -0.18               | 0.04               | 1.1                 | 77.6               | 3.2                 | 0.1                | 4.4                    | 77.7                  |
| IFN- $\gamma$     | Interferon gamma                    | 0.43                | -0.40              | -0.35               | 0.77               | 18.2                | 16.0               | 12.5                | 59.0               | 30.8                   | 75.1                  |
| TNF               | Tumor necrosis factors              | 0.17                | -0.39              | 0.42                | 0.77               | 2.8                 | 15.5               | 17.9                | 59.3               | 20.7                   | 74.8                  |
| IP-10             | Interferon gamma-induced protein 10 | -0.19               | -0.71              | 0.78                | 0.04               | 3.5                 | 50.5               | 61.2                | 0.2                | 64.7                   | 50.7                  |
| IL-1 $\beta$      | Interleukin-1 beta                  | 0.09                | -0.30              | -0.32               | 0.74               | 0.8                 | 9.1                | 9.9                 | 55.0               | 10.7                   | 64.1                  |
| MCP-1             | Monocyte chemoattractant protein-1  | -0.62               | -0.44              | -0.48               | -0.15              | 38.5                | 19.6               | 22.9                | 2.3                | 61.3                   | 21.8                  |
| IL-8              | Interleukin-8                       | 0.02                | -0.43              | -0.25               | 0.65               | 0.0                 | 18.4               | 6.3                 | 42.3               | 6.3                    | 60.7                  |
| Nt                | Microneutralization inhibition      | -0.37               | -0.45              | -0.35               | 0.60               | 13.9                | 20.6               | 12.5                | 36.4               | 26.4                   | 57.0                  |
| IL-6              | Interleukin-6                       | 0.37                | -0.50              | -0.37               | 0.57               | 13.9                | 24.5               | 13.4                | 32.3               | 27.3                   | 56.8                  |
| Eotaxin-1         | Eotaxin-1                           | -0.52               | -0.23              | 0.26                | -0.13              | 27.3                | 5.5                | 6.7                 | 1.7                | 34.1                   | 7.2                   |
| RANTES            | Chemokine (C-C motif) ligand 5      | -0.52               | -0.23              | -0.03               | -0.44              | 27.2                | 5.1                | 0.1                 | 19.1               | 27.3                   | 24.2                  |

| IMO Variable | IMO Variable Name | I1<br>(SV-<br>AS03) | I1<br>(SV-<br>PBS) | I2<br>(SV-<br>AS03) | I2<br>(SV-<br>PBS) | V1<br>(SV-<br>AS03) | V1<br>(SV-<br>PBS) | V2<br>(SV-<br>AS03) | V2<br>(SV-<br>PBS) | V1+V2<br>(SV-<br>AS03) | V1+V2<br>(SV-<br>PBS) |
|--------------|-------------------|---------------------|--------------------|---------------------|--------------------|---------------------|--------------------|---------------------|--------------------|------------------------|-----------------------|
|--------------|-------------------|---------------------|--------------------|---------------------|--------------------|---------------------|--------------------|---------------------|--------------------|------------------------|-----------------------|

**Table A129:** Canonical loadings and explained variance (RNA-Seq, Dendritic cells, Day 3, IMO variables). IMO variables with at least 25% of explained variance for the first two canonical variates are listed. GX: canonical loadings for canonical variate X, VX: % explained variance for canonical variate X, V1+V2: total % explained variance for both canonical variates. Values for CCA results with a poor cross validation score (< 0.70) are left blank. Sorted by maximum explained variance across treatments (V1+V2).

| Gene ID         | Gene Name     | G1<br>(SV-<br>AS03) | G1<br>(SV-<br>PBS) | G2<br>(SV-<br>AS03) | G2<br>(SV-<br>PBS) | V1<br>(SV-<br>AS03) | V1<br>(SV-<br>PBS) | V2<br>(SV-<br>AS03) | V2<br>(SV-<br>PBS) | V1+V2<br>(SV-<br>AS03) | V1+V2<br>(SV-<br>PBS) |
|-----------------|---------------|---------------------|--------------------|---------------------|--------------------|---------------------|--------------------|---------------------|--------------------|------------------------|-----------------------|
| ENSG00000163736 | PPBP          |                     | -0.65              |                     | 0.63               |                     | 42.0               |                     | 39.7               |                        | 81.7                  |
| ENSG00000188536 | HBA2          |                     | -0.87              |                     | -0.23              |                     | 75.8               |                     | 5.2                |                        | 80.9                  |
| ENSG00000245205 | RP11-841C19.6 |                     | -0.67              |                     | -0.56              |                     | 45.4               |                     | 31.3               |                        | 76.7                  |
| ENSG00000158856 | EPB49         |                     | -0.57              |                     | 0.65               |                     | 32.7               |                     | 42.4               |                        | 75.2                  |
| ENSG00000244734 | HBB           |                     | -0.80              |                     | -0.23              |                     | 63.8               |                     | 5.2                |                        | 69.0                  |
| ENSG00000120885 | CLU           |                     | -0.41              |                     | 0.68               |                     | 17.1               |                     | 46.3               |                        | 63.4                  |
| ENSG00000125968 | ID1           |                     | -0.74              |                     | -0.25              |                     | 54.8               |                     | 6.3                |                        | 61.1                  |
| ENSG00000163737 | PF4           |                     | -0.57              |                     | 0.53               |                     | 32.7               |                     | 27.6               |                        | 60.3                  |
| ENSG00000088053 | GP6           |                     | 0.08               |                     | 0.73               |                     | 0.6                |                     | 53.3               |                        | 54.0                  |
| ENSG00000113140 | SPARC         |                     | -0.44              |                     | 0.58               |                     | 19.2               |                     | 33.3               |                        | 52.5                  |
| ENSG00000206172 | HBA1          |                     | -0.53              |                     | -0.45              |                     | 27.6               |                     | 20.0               |                        | 47.6                  |
| ENSG00000225492 | GBP1P1        |                     | -0.59              |                     | 0.33               |                     | 34.6               |                     | 11.1               |                        | 45.8                  |
| ENSG00000005961 | ITGA2B        |                     | -0.34              |                     | 0.57               |                     | 11.8               |                     | 32.9               |                        | 44.7                  |
| ENSG00000228323 | AC008753.6    |                     | -0.31              |                     | 0.50               |                     | 9.5                |                     | 25.0               |                        | 34.5                  |
| ENSG00000006075 | CCL3          |                     | -0.31              |                     | 0.32               |                     | 9.4                |                     | 10.5               |                        | 20.0                  |
| ENSG00000099864 | PALM          |                     | -0.27              |                     | 0.26               |                     | 7.2                |                     | 6.8                |                        | 14.1                  |
| ENSG00000159189 | C1QC          |                     | 0.36               |                     | 0.10               |                     | 12.8               |                     | 0.9                |                        | 13.8                  |
| ENSG00000137267 | TUBB2A        |                     | -0.21              |                     | -0.26              |                     | 4.5                |                     | 6.5                |                        | 11.0                  |
| ENSG00000125740 | FOSB          |                     | -0.08              |                     | 0.32               |                     | 0.6                |                     | 10.0               |                        | 10.7                  |
| ENSG00000164930 | FZD6          |                     | 0.17               |                     | -0.27              |                     | 3.0                |                     | 7.1                |                        | 10.0                  |
| ENSG00000090104 | RGS1          |                     | -0.21              |                     | 0.15               |                     | 4.5                |                     | 2.2                |                        | 6.7                   |
| ENSG00000069696 | DRD4          |                     | -0.15              |                     | -0.17              |                     | 2.1                |                     | 2.8                |                        | 5.0                   |
| ENSG00000123689 | G0S2          |                     | -0.16              |                     | -0.16              |                     | 2.5                |                     | 2.5                |                        | 4.9                   |
| ENSG00000256049 | PADI6         |                     | 0.14               |                     | -0.05              |                     | 2.0                |                     | 0.2                |                        | 2.2                   |

**Table A130:** Canonical loadings and explained variance (RNA-Seq, Dendritic cells, Day 7, Gene variables). Gene variables with at least 25% of explained variance for the first two canonical variates are listed. GX: canonical loadings for canonical variate X, VX: % explained variance for canonical variate X, V1+V2: total % explained variance for both canonical variates. Values for CCA results with a poor cross validation score (< 0.70) are left blank. Sorted by maximum explained variance across treatments (V1+V2).

| IMO Variable  | IMO Variable Name              | I1<br>(SV-<br>AS03) | I1<br>(SV-<br>PBS) | I2<br>(SV-<br>AS03) | I2<br>(SV-<br>PBS) | V1<br>(SV-<br>AS03) | V1<br>(SV-<br>PBS) | V2<br>(SV-<br>AS03) | V2<br>(SV-<br>PBS) | V1+V2<br>(SV-<br>AS03) | V1+V2<br>(SV-<br>PBS) |
|---------------|--------------------------------|---------------------|--------------------|---------------------|--------------------|---------------------|--------------------|---------------------|--------------------|------------------------|-----------------------|
| Nt            | Microneutralization inhibition |                     | 0.18               |                     | -0.80              |                     | 3.3                |                     | 63.4               |                        | 66.7                  |
| RANTES        | Chemokine (C-C motif) ligand 5 |                     | -0.20              |                     | 0.79               |                     | 4.0                |                     | 62.5               |                        | 66.5                  |
| IL-12p70      | Interleukin-12 p70             |                     | -0.81              |                     | 0.01               |                     | 66.4               |                     | 0.0                |                        | 66.4                  |
| IFN- $\gamma$ | Interferon gamma               |                     | 0.44               |                     | -0.53              |                     | 19.7               |                     | 28.5               |                        | 48.2                  |
| IL-6          | Interleukin-6                  |                     | 0.40               |                     | -0.55              |                     | 15.9               |                     | 30.3               |                        | 46.1                  |
| TNF           | Tumor necrosis factors         |                     | 0.53               |                     | 0.33               |                     | 28.6               |                     | 11.0               |                        | 39.6                  |

| IMO Variable   | IMO Variable Name                   | I1<br>(SV-<br>AS03) | I1<br>(SV-<br>PBS) | I2<br>(SV-<br>AS03) | I2<br>(SV-<br>PBS) | V1<br>(SV-<br>AS03) | V1<br>(SV-<br>PBS) | V2<br>(SV-<br>AS03) | V2<br>(SV-<br>PBS) | V1+V2<br>(SV-<br>AS03) | V1+V2<br>(SV-<br>PBS) |
|----------------|-------------------------------------|---------------------|--------------------|---------------------|--------------------|---------------------|--------------------|---------------------|--------------------|------------------------|-----------------------|
| Eotaxin-1      | Eotaxin-1                           |                     | -0.54              |                     | 0.11               |                     | 29.1               |                     | 1.2                |                        | 30.4                  |
| IL-8           | Interleukin-8                       |                     | 0.31               |                     | -0.40              |                     | 9.7                |                     | 16.2               |                        | 25.8                  |
| MIP-1 $\alpha$ | Macrophage inflammatory protein     |                     | 0.42               |                     | -0.23              |                     | 17.7               |                     | 5.5                |                        | 23.2                  |
| IP-10          | Interferon gamma-induced protein 10 |                     | 0.32               |                     | 0.09               |                     | 10.2               |                     | 0.8                |                        | 11.0                  |
| IL-1 $\beta$   | Interleukin-1 beta                  |                     | -0.14              |                     | -0.25              |                     | 1.8                |                     | 6.5                |                        | 8.3                   |
| IL-10          | Interleukin-10                      |                     | 0.10               |                     | 0.19               |                     | 1.0                |                     | 3.4                |                        | 4.4                   |
| MCP-1          | Monocyte chemoattractant protein-1  |                     | 0.18               |                     | 0.10               |                     | 3.2                |                     | 1.0                |                        | 4.2                   |

**Table A131:** Canonical loadings and explained variance (RNA-Seq, Dendritic cells, Day 7, IMO variables). IMO variables with at least 25% of explained variance for the first two canonical variates are listed. GX: canonical loadings for canonical variate X, VX: % explained variance for canonical variate X, V1+V2: total % explained variance for both canonical variates. Values for CCA results with a poor cross validation score (< 0.70) are left blank. Sorted by maximum explained variance across treatments (V1+V2).

| Gene ID         | Gene Name  | G1<br>(SV-<br>AS03) | G1<br>(SV-<br>PBS) | G2<br>(SV-<br>AS03) | G2<br>(SV-<br>PBS) | V1<br>(SV-<br>AS03) | V1<br>(SV-<br>PBS) | V2<br>(SV-<br>AS03) | V2<br>(SV-<br>PBS) | V1+V2<br>(SV-<br>AS03) | V1+V2<br>(SV-<br>PBS) |
|-----------------|------------|---------------------|--------------------|---------------------|--------------------|---------------------|--------------------|---------------------|--------------------|------------------------|-----------------------|
| ENSG00000126368 | NR1D1      | 0.88                |                    | -0.29               |                    | 77.6                |                    | 8.4                 |                    | 86.0                   |                       |
| ENSG00000144218 | AFF3       | 0.90                |                    | -0.22               |                    | 80.3                |                    | 4.8                 |                    | 85.1                   |                       |
| ENSG00000225217 | HSPA7      | -0.91               |                    | -0.17               |                    | 81.9                |                    | 2.9                 |                    | 84.8                   |                       |
| ENSG00000232931 | AC008268.3 | 0.85                |                    | 0.33                |                    | 72.9                |                    | 10.6                |                    | 83.5                   |                       |
| ENSG00000104972 | LILRB1     | -0.91               |                    | 0.07                |                    | 82.7                |                    | 0.5                 |                    | 83.2                   |                       |
| ENSG00000173110 | HSPA6      | -0.89               |                    | -0.13               |                    | 79.2                |                    | 1.7                 |                    | 80.9                   |                       |
| ENSG00000235081 | AC010492.2 | -0.26               |                    | -0.86               |                    | 6.7                 |                    | 74.0                |                    | 80.7                   |                       |
| ENSG00000139899 | CBLN3      | -0.88               |                    | -0.14               |                    | 77.7                |                    | 2.1                 |                    | 79.8                   |                       |
| ENSG00000128383 | APOBEC3A   | -0.89               |                    | -0.00               |                    | 79.3                |                    | 0.0                 |                    | 79.3                   |                       |
| ENSG00000120885 | CLU        | -0.84               |                    | -0.28               |                    | 71.3                |                    | 7.9                 |                    | 79.2                   |                       |
| ENSG00000187608 | ISG15      | -0.88               |                    | 0.09                |                    | 77.6                |                    | 0.8                 |                    | 78.4                   |                       |
| ENSG00000149294 | NCAM1      | 0.88                |                    | 0.03                |                    | 78.3                |                    | 0.1                 |                    | 78.4                   |                       |
| ENSG00000160789 | LMNA       | 0.87                |                    | -0.13               |                    | 76.2                |                    | 1.6                 |                    | 77.8                   |                       |
| ENSG00000168546 | GFRA2      | 0.79                |                    | -0.39               |                    | 62.6                |                    | 15.1                |                    | 77.7                   |                       |
| ENSG00000100100 | PIK3IP1    | 0.82                |                    | 0.31                |                    | 67.4                |                    | 9.7                 |                    | 77.1                   |                       |
| ENSG00000213420 | GPC2       | 0.22                |                    | 0.85                |                    | 4.9                 |                    | 71.5                |                    | 76.4                   |                       |
| ENSG00000183087 | GAS6       | -0.85               |                    | -0.21               |                    | 71.4                |                    | 4.6                 |                    | 76.0                   |                       |
| ENSG00000244682 | FCGR2C     | -0.85               |                    | -0.19               |                    | 72.6                |                    | 3.4                 |                    | 76.0                   |                       |
| ENSG00000203416 | FAM32B     | -0.84               |                    | 0.20                |                    | 71.2                |                    | 3.8                 |                    | 75.0                   |                       |
| ENSG00000090920 | FCGBP      | 0.86                |                    | 0.04                |                    | 74.3                |                    | 0.2                 |                    | 74.5                   |                       |
| ENSG00000185885 | IFITM1     | -0.86               |                    | -0.09               |                    | 73.3                |                    | 0.9                 |                    | 74.2                   |                       |
| ENSG00000243811 | APOBEC3D   | -0.85               |                    | -0.12               |                    | 72.6                |                    | 1.5                 |                    | 74.1                   |                       |
| ENSG00000108950 | FAM20A     | -0.75               |                    | -0.41               |                    | 56.8                |                    | 17.1                |                    | 73.9                   |                       |
| ENSG00000179044 | EXOC3L1    | -0.86               |                    | 0.07                |                    | 73.2                |                    | 0.5                 |                    | 73.8                   |                       |
| ENSG00000142089 | IFITM3     | -0.83               |                    | -0.21               |                    | 69.4                |                    | 4.3                 |                    | 73.7                   |                       |
| ENSG00000019102 | VSIG2      | 0.83                |                    | 0.22                |                    | 68.2                |                    | 5.0                 |                    | 73.2                   |                       |
| ENSG00000165178 | NCF1C      | -0.85               |                    | 0.01                |                    | 73.0                |                    | 0.0                 |                    | 73.1                   |                       |
| ENSG00000155761 | SPAG17     | 0.85                |                    | 0.03                |                    | 72.9                |                    | 0.1                 |                    | 73.0                   |                       |
| ENSG00000175262 | C1orf127   | 0.84                |                    | -0.12               |                    | 70.9                |                    | 1.5                 |                    | 72.4                   |                       |
| ENSG00000229754 | CXCR2P1    | -0.84               |                    | 0.11                |                    | 71.2                |                    | 1.1                 |                    | 72.3                   |                       |
| ENSG00000203747 | FCGR3A     | -0.59               |                    | -0.61               |                    | 35.0                |                    | 37.0                |                    | 72.1                   |                       |
| ENSG00000096996 | IL12RB1    | -0.85               |                    | 0.00                |                    | 71.8                |                    | 0.0                 |                    | 71.8                   |                       |
| ENSG00000158270 | COLEC12    | 0.83                |                    | 0.14                |                    | 69.1                |                    | 2.1                 |                    | 71.2                   |                       |

| Gene ID         | Gene Name  | G1<br>(SV-<br>AS03) | G1<br>(SV-<br>PBS) | G2<br>(SV-<br>AS03) | G2<br>(SV-<br>PBS) | V1<br>(SV-<br>AS03) | V1<br>(SV-<br>PBS) | V2<br>(SV-<br>AS03) | V2<br>(SV-<br>PBS) | V1+V2<br>(SV-<br>AS03) | V1+V2<br>(SV-<br>PBS) |
|-----------------|------------|---------------------|--------------------|---------------------|--------------------|---------------------|--------------------|---------------------|--------------------|------------------------|-----------------------|
| ENSG00000168899 | VAMP5      | -0.84               |                    | 0.05                |                    | 70.4                |                    | 0.3                 |                    | 70.7                   |                       |
| ENSG00000107201 | DDX58      | -0.84               |                    | -0.04               |                    | 70.1                |                    | 0.1                 |                    | 70.2                   |                       |
| ENSG00000157601 | MX1        | -0.83               |                    | 0.10                |                    | 69.0                |                    | 1.0                 |                    | 70.0                   |                       |
| ENSG00000225131 | PSME2P2    | -0.82               |                    | 0.14                |                    | 67.9                |                    | 2.1                 |                    | 69.9                   |                       |
| ENSG00000149564 | ESAM       | 0.73                |                    | 0.40                |                    | 54.0                |                    | 15.7                |                    | 69.7                   |                       |
| ENSG00000116824 | CD2        | 0.82                |                    | 0.13                |                    | 67.9                |                    | 1.7                 |                    | 69.6                   |                       |
| ENSG00000160932 | LY6E       | -0.83               |                    | 0.08                |                    | 68.8                |                    | 0.7                 |                    | 69.6                   |                       |
| ENSG00000172878 | METAP1D    | 0.83                |                    | 0.03                |                    | 69.4                |                    | 0.1                 |                    | 69.5                   |                       |
| ENSG00000172183 | ISG20      | -0.83               |                    | 0.08                |                    | 68.8                |                    | 0.6                 |                    | 69.4                   |                       |
| ENSG00000158517 | NCF1       | -0.82               |                    | 0.12                |                    | 67.7                |                    | 1.5                 |                    | 69.2                   |                       |
| ENSG00000125148 | MT2A       | -0.83               |                    | -0.01               |                    | 69.2                |                    | 0.0                 |                    | 69.2                   |                       |
| ENSG00000182389 | CACNB4     | 0.83                |                    | 0.07                |                    | 68.8                |                    | 0.4                 |                    | 69.2                   |                       |
| ENSG00000145287 | PLAC8      | -0.83               |                    | 0.07                |                    | 68.5                |                    | 0.5                 |                    | 69.0                   |                       |
| ENSG00000004468 | CD38       | -0.83               |                    | 0.01                |                    | 68.9                |                    | 0.0                 |                    | 68.9                   |                       |
| ENSG00000163568 | AIM2       | -0.82               |                    | 0.12                |                    | 67.2                |                    | 1.5                 |                    | 68.7                   |                       |
| ENSG00000115155 | OTOF       | -0.69               |                    | 0.46                |                    | 47.3                |                    | 21.2                |                    | 68.5                   |                       |
| ENSG00000059588 | TARBP1     | 0.81                |                    | 0.15                |                    | 66.1                |                    | 2.1                 |                    | 68.2                   |                       |
| ENSG00000167371 | PRRT2      | -0.70               |                    | -0.44               |                    | 48.7                |                    | 19.1                |                    | 67.8                   |                       |
| ENSG00000108679 | LGALS3BP   | -0.82               |                    | 0.04                |                    | 67.5                |                    | 0.1                 |                    | 67.6                   |                       |
| ENSG00000025708 | TYMP       | -0.82               |                    | -0.06               |                    | 67.1                |                    | 0.4                 |                    | 67.5                   |                       |
| ENSG00000130489 | SCO2       | -0.82               |                    | -0.04               |                    | 67.1                |                    | 0.2                 |                    | 67.3                   |                       |
| ENSG00000138646 | HERC5      | -0.82               |                    | -0.02               |                    | 67.0                |                    | 0.1                 |                    | 67.1                   |                       |
| ENSG00000198959 | TGM2       | -0.82               |                    | 0.06                |                    | 66.5                |                    | 0.3                 |                    | 66.8                   |                       |
| ENSG00000185745 | IFIT1      | -0.81               |                    | 0.06                |                    | 66.0                |                    | 0.3                 |                    | 66.3                   |                       |
| ENSG00000137757 | CASP5      | -0.66               |                    | -0.47               |                    | 43.8                |                    | 22.5                |                    | 66.3                   |                       |
| ENSG00000174721 | FGFBP3     | 0.78                |                    | -0.23               |                    | 60.9                |                    | 5.2                 |                    | 66.1                   |                       |
| ENSG00000134321 | RSAD2      | -0.81               |                    | -0.04               |                    | 66.0                |                    | 0.1                 |                    | 66.1                   |                       |
| ENSG00000241106 | HLA-DOB    | -0.80               |                    | 0.17                |                    | 63.3                |                    | 2.8                 |                    | 66.1                   |                       |
| ENSG00000013364 | MVP        | -0.80               |                    | -0.12               |                    | 64.4                |                    | 1.4                 |                    | 65.7                   |                       |
| ENSG00000010278 | CD9        | 0.77                |                    | -0.26               |                    | 58.9                |                    | 6.7                 |                    | 65.6                   |                       |
| ENSG00000100911 | PSME2      | -0.80               |                    | 0.14                |                    | 63.5                |                    | 2.0                 |                    | 65.5                   |                       |
| ENSG00000136235 | GPNMB      | 0.64                |                    | -0.50               |                    | 40.4                |                    | 25.1                |                    | 65.5                   |                       |
| ENSG00000152672 | CLEC4F     | 0.69                |                    | -0.42               |                    | 47.8                |                    | 17.5                |                    | 65.3                   |                       |
| ENSG00000213366 | GSTM2      | 0.81                |                    | -0.03               |                    | 65.2                |                    | 0.1                 |                    | 65.3                   |                       |
| ENSG00000139572 | GPR84      | -0.81               |                    | -0.02               |                    | 65.3                |                    | 0.0                 |                    | 65.3                   |                       |
| ENSG00000124256 | ZBP1       | -0.80               |                    | 0.08                |                    | 64.5                |                    | 0.6                 |                    | 65.1                   |                       |
| ENSG00000101017 | CD40       | -0.81               |                    | 0.02                |                    | 64.9                |                    | 0.1                 |                    | 65.0                   |                       |
| ENSG00000138755 | CXCL9      | -0.75               |                    | -0.28               |                    | 57.0                |                    | 8.0                 |                    | 65.0                   |                       |
| ENSG00000133321 | RARRES3    | -0.80               |                    | 0.06                |                    | 64.4                |                    | 0.4                 |                    | 64.8                   |                       |
| ENSG00000204653 | ASPDH      | 0.80                |                    | 0.03                |                    | 64.6                |                    | 0.1                 |                    | 64.7                   |                       |
| ENSG00000026751 | SLAMF7     | -0.80               |                    | 0.02                |                    | 64.5                |                    | 0.0                 |                    | 64.6                   |                       |
| ENSG00000115392 | FANCL      | -0.80               |                    | -0.05               |                    | 64.3                |                    | 0.2                 |                    | 64.5                   |                       |
| ENSG00000171049 | FPR2       | -0.77               |                    | -0.22               |                    | 59.5                |                    | 4.9                 |                    | 64.4                   |                       |
| ENSG00000182557 | SPNS3      | 0.80                |                    | 0.09                |                    | 63.2                |                    | 0.8                 |                    | 64.1                   |                       |
| ENSG00000185339 | TCN2       | -0.80               |                    | 0.08                |                    | 63.3                |                    | 0.7                 |                    | 64.0                   |                       |
| ENSG00000239899 | AC011994.1 | -0.66               |                    | 0.45                |                    | 43.6                |                    | 20.4                |                    | 64.0                   |                       |
| ENSG00000166278 | C2         | -0.80               |                    | 0.04                |                    | 63.5                |                    | 0.1                 |                    | 63.6                   |                       |
| ENSG00000154258 | ABCA9      | 0.73                |                    | -0.31               |                    | 53.7                |                    | 9.7                 |                    | 63.3                   |                       |
| ENSG00000135114 | OASL       | -0.79               |                    | -0.06               |                    | 62.8                |                    | 0.3                 |                    | 63.2                   |                       |
| ENSG00000224940 | PRRT4      | 0.79                |                    | -0.02               |                    | 63.0                |                    | 0.1                 |                    | 63.1                   |                       |
| ENSG00000163006 | CCDC138    | 0.41                |                    | -0.68               |                    | 16.5                |                    | 46.5                |                    | 62.9                   |                       |



| Gene ID         | Gene Name     | G1<br>(SV-<br>AS03) | G1<br>(SV-<br>PBS) | G2<br>(SV-<br>AS03) | G2<br>(SV-<br>PBS) | V1<br>(SV-<br>AS03) | V1<br>(SV-<br>PBS) | V2<br>(SV-<br>AS03) | V2<br>(SV-<br>PBS) | V1+V2<br>(SV-<br>AS03) | V1+V2<br>(SV-<br>PBS) |
|-----------------|---------------|---------------------|--------------------|---------------------|--------------------|---------------------|--------------------|---------------------|--------------------|------------------------|-----------------------|
| ENSG00000198133 | TMEM229B      | -0.79               |                    | 0.09                |                    | 62.0                |                    | 0.8                 |                    | 62.8                   |                       |
| ENSG00000173369 | C1QB          | -0.56               |                    | -0.56               |                    | 31.3                |                    | 31.5                |                    | 62.8                   |                       |
| ENSG00000135047 | CTSL1         | -0.79               |                    | -0.05               |                    | 62.3                |                    | 0.3                 |                    | 62.6                   |                       |
| ENSG00000177989 | ODF3B         | -0.79               |                    | 0.04                |                    | 62.0                |                    | 0.2                 |                    | 62.2                   |                       |
| ENSG00000213557 | RP11-240E2.2  | 0.79                |                    | -0.00               |                    | 62.1                |                    | 0.0                 |                    | 62.1                   |                       |
| ENSG00000137959 | IFI44L        | -0.78               |                    | 0.08                |                    | 61.3                |                    | 0.7                 |                    | 62.1                   |                       |
| ENSG00000133121 | STARD13       | 0.79                |                    | 0.05                |                    | 61.7                |                    | 0.3                 |                    | 61.9                   |                       |
| ENSG00000204930 | C9orf128      | 0.61                |                    | -0.50               |                    | 36.6                |                    | 25.2                |                    | 61.8                   |                       |
| ENSG00000136514 | RTP4          | -0.78               |                    | -0.09               |                    | 60.9                |                    | 0.8                 |                    | 61.7                   |                       |
| ENSG00000132530 | XAF1          | -0.78               |                    | -0.08               |                    | 61.0                |                    | 0.7                 |                    | 61.7                   |                       |
| ENSG00000141096 | DPEP3         | 0.76                |                    | 0.20                |                    | 57.6                |                    | 4.0                 |                    | 61.6                   |                       |
| ENSG00000205413 | SAMD9         | -0.78               |                    | 0.01                |                    | 61.5                |                    | 0.0                 |                    | 61.5                   |                       |
| ENSG00000087589 | CASS4         | 0.78                |                    | -0.04               |                    | 61.3                |                    | 0.1                 |                    | 61.4                   |                       |
| ENSG00000137965 | IFI44         | -0.78               |                    | 0.06                |                    | 61.1                |                    | 0.3                 |                    | 61.4                   |                       |
| ENSG00000115267 | IFIH1         | -0.78               |                    | 0.04                |                    | 61.1                |                    | 0.1                 |                    | 61.2                   |                       |
| ENSG00000172159 | FRMD3         | -0.78               |                    | -0.02               |                    | 61.2                |                    | 0.1                 |                    | 61.2                   |                       |
| ENSG00000111335 | OAS2          | -0.78               |                    | 0.03                |                    | 60.7                |                    | 0.1                 |                    | 60.8                   |                       |
| ENSG00000155363 | MOV10         | -0.78               |                    | -0.02               |                    | 60.6                |                    | 0.1                 |                    | 60.6                   |                       |
| ENSG00000166689 | PLEKHA7       | 0.71                |                    | -0.31               |                    | 50.8                |                    | 9.7                 |                    | 60.5                   |                       |
| ENSG00000126262 | FFAR2         | -0.77               |                    | -0.13               |                    | 58.8                |                    | 1.6                 |                    | 60.4                   |                       |
| ENSG00000160111 | CPAMD8        | 0.77                |                    | -0.06               |                    | 60.0                |                    | 0.4                 |                    | 60.4                   |                       |
| ENSG00000164867 | NOS3          | 0.69                |                    | -0.37               |                    | 47.0                |                    | 13.4                |                    | 60.3                   |                       |
| ENSG00000240065 | PSMB9         | -0.77               |                    | 0.01                |                    | 59.9                |                    | 0.0                 |                    | 59.9                   |                       |
| ENSG00000049089 | COL9A2        | 0.77                |                    | 0.10                |                    | 58.7                |                    | 1.1                 |                    | 59.8                   |                       |
| ENSG00000162694 | EXTL2         | 0.57                |                    | -0.51               |                    | 32.9                |                    | 26.4                |                    | 59.3                   |                       |
| ENSG00000236783 | RP11-272G11.1 | 0.75                |                    | -0.17               |                    | 56.3                |                    | 2.9                 |                    | 59.3                   |                       |
| ENSG00000121858 | TNFSF10       | -0.77               |                    | -0.03               |                    | 59.2                |                    | 0.1                 |                    | 59.2                   |                       |
| ENSG00000213172 | RP1-228H13.2  | -0.54               |                    | -0.55               |                    | 28.7                |                    | 30.5                |                    | 59.2                   |                       |
| ENSG00000111331 | OAS3          | -0.77               |                    | 0.06                |                    | 58.8                |                    | 0.4                 |                    | 59.1                   |                       |
| ENSG00000168062 | BATF2         | -0.77               |                    | -0.04               |                    | 58.9                |                    | 0.1                 |                    | 59.1                   |                       |
| ENSG00000072694 | FCGR2B        | -0.72               |                    | -0.27               |                    | 51.2                |                    | 7.3                 |                    | 58.6                   |                       |
| ENSG00000111110 | PPM1H         | 0.76                |                    | -0.03               |                    | 58.2                |                    | 0.1                 |                    | 58.3                   |                       |
| ENSG00000197381 | ADARB1        | -0.72               |                    | -0.25               |                    | 51.8                |                    | 6.5                 |                    | 58.2                   |                       |
| ENSG00000068079 | IFI35         | -0.76               |                    | -0.03               |                    | 58.1                |                    | 0.1                 |                    | 58.2                   |                       |
| ENSG00000256262 | RP11-117B7.1  | -0.58               |                    | -0.49               |                    | 34.2                |                    | 24.0                |                    | 58.1                   |                       |
| ENSG00000123609 | NMI           | -0.76               |                    | -0.02               |                    | 57.8                |                    | 0.0                 |                    | 57.9                   |                       |
| ENSG00000156265 | C21orf7       | -0.76               |                    | 0.06                |                    | 57.3                |                    | 0.4                 |                    | 57.7                   |                       |
| ENSG00000173706 | HEG1          | -0.70               |                    | -0.29               |                    | 49.1                |                    | 8.5                 |                    | 57.7                   |                       |
| ENSG00000115594 | IL1R1         | 0.68                |                    | -0.33               |                    | 46.5                |                    | 11.2                |                    | 57.7                   |                       |
| ENSG00000130589 | RP4-697K14.7  | -0.75               |                    | -0.13               |                    | 55.8                |                    | 1.8                 |                    | 57.6                   |                       |
| ENSG00000166428 | PLD4          | 0.73                |                    | -0.20               |                    | 53.6                |                    | 3.8                 |                    | 57.4                   |                       |
| ENSG00000019169 | MARCO         | -0.75               |                    | 0.13                |                    | 55.6                |                    | 1.7                 |                    | 57.4                   |                       |
| ENSG00000145349 | CAMK2D        | -0.74               |                    | 0.17                |                    | 54.5                |                    | 2.8                 |                    | 57.2                   |                       |
| ENSG00000204267 | TAP2          | -0.76               |                    | -0.00               |                    | 57.2                |                    | 0.0                 |                    | 57.2                   |                       |
| ENSG00000197536 | C5orf56       | -0.76               |                    | 0.00                |                    | 57.0                |                    | 0.0                 |                    | 57.0                   |                       |
| ENSG00000108691 | CCL2          | -0.75               |                    | -0.05               |                    | 56.6                |                    | 0.2                 |                    | 56.8                   |                       |
| ENSG00000152766 | ANKRD22       | -0.75               |                    | -0.06               |                    | 56.2                |                    | 0.3                 |                    | 56.5                   |                       |
| ENSG00000138031 | ADCY3         | -0.68               |                    | -0.33               |                    | 45.7                |                    | 10.7                |                    | 56.4                   |                       |
| ENSG00000132518 | GUCY2D        | 0.73                |                    | 0.18                |                    | 53.0                |                    | 3.3                 |                    | 56.3                   |                       |
| ENSG00000100342 | APOL1         | -0.75               |                    | 0.00                |                    | 56.3                |                    | 0.0                 |                    | 56.3                   |                       |
| ENSG00000189007 | ADAT2         | 0.75                |                    | -0.06               |                    | 55.7                |                    | 0.4                 |                    | 56.0                   |                       |

| Gene ID         | Gene Name    | G1<br>(SV-<br>AS03) | G1<br>(SV-<br>PBS) | G2<br>(SV-<br>AS03) | G2<br>(SV-<br>PBS) | V1<br>(SV-<br>AS03) | V1<br>(SV-<br>PBS) | V2<br>(SV-<br>AS03) | V2<br>(SV-<br>PBS) | V1+V2<br>(SV-<br>AS03) | V1+V2<br>(SV-<br>PBS) |
|-----------------|--------------|---------------------|--------------------|---------------------|--------------------|---------------------|--------------------|---------------------|--------------------|------------------------|-----------------------|
| ENSG00000137628 | DDX60        | -0.75               |                    | -0.03               |                    | 55.8                |                    | 0.1                 |                    | 56.0                   |                       |
| ENSG00000134326 | CMPK2        | -0.75               |                    | 0.03                |                    | 55.6                |                    | 0.1                 |                    | 55.6                   |                       |
| ENSG00000183496 | MEX3B        | 0.74                |                    | -0.04               |                    | 55.5                |                    | 0.2                 |                    | 55.6                   |                       |
| ENSG00000123610 | TNFAIP6      | -0.70               |                    | 0.25                |                    | 49.2                |                    | 6.4                 |                    | 55.6                   |                       |
| ENSG00000177409 | SAMD9L       | -0.74               |                    | -0.06               |                    | 55.1                |                    | 0.4                 |                    | 55.5                   |                       |
| ENSG00000128394 | APOBEC3F     | -0.72               |                    | -0.21               |                    | 51.2                |                    | 4.2                 |                    | 55.5                   |                       |
| ENSG00000141574 | SECTM1       | -0.74               |                    | -0.12               |                    | 54.1                |                    | 1.4                 |                    | 55.4                   |                       |
| ENSG00000225886 | RP11-288L9.4 | -0.74               |                    | -0.01               |                    | 55.4                |                    | 0.0                 |                    | 55.4                   |                       |
| ENSG00000157551 | KCNJ15       | -0.50               |                    | -0.55               |                    | 25.2                |                    | 30.1                |                    | 55.2                   |                       |
| ENSG00000162512 | SDC3         | -0.71               |                    | -0.22               |                    | 50.2                |                    | 4.8                 |                    | 55.0                   |                       |
| ENSG00000149131 | SERPING1     | -0.74               |                    | -0.02               |                    | 54.7                |                    | 0.0                 |                    | 54.7                   |                       |
| ENSG00000165806 | CASP7        | -0.73               |                    | -0.12               |                    | 53.2                |                    | 1.5                 |                    | 54.6                   |                       |
| ENSG00000169136 | ATF5         | -0.74               |                    | -0.03               |                    | 54.4                |                    | 0.1                 |                    | 54.5                   |                       |
| ENSG00000137801 | THBS1        | 0.73                |                    | -0.06               |                    | 53.6                |                    | 0.4                 |                    | 53.9                   |                       |
| ENSG00000185567 | AHNAK2       | 0.71                |                    | 0.17                |                    | 50.9                |                    | 3.0                 |                    | 53.9                   |                       |
| ENSG00000144354 | CDCA7        | 0.70                |                    | 0.21                |                    | 49.3                |                    | 4.5                 |                    | 53.8                   |                       |
| ENSG00000133313 | CNDP2        | -0.72               |                    | -0.15               |                    | 51.3                |                    | 2.3                 |                    | 53.6                   |                       |
| ENSG00000131203 | IDO1         | -0.73               |                    | -0.02               |                    | 53.5                |                    | 0.1                 |                    | 53.6                   |                       |
| ENSG00000132386 | SERPINF1     | 0.73                |                    | -0.06               |                    | 53.3                |                    | 0.3                 |                    | 53.6                   |                       |
| ENSG00000119917 | IFIT3        | -0.73               |                    | -0.06               |                    | 52.9                |                    | 0.4                 |                    | 53.2                   |                       |
| ENSG00000205220 | PSMB10       | -0.72               |                    | 0.08                |                    | 52.4                |                    | 0.6                 |                    | 53.1                   |                       |
| ENSG00000173372 | C1QA         | -0.61               |                    | -0.39               |                    | 37.5                |                    | 15.5                |                    | 52.9                   |                       |
| ENSG00000156587 | UBE2L6       | -0.73               |                    | 0.04                |                    | 52.7                |                    | 0.1                 |                    | 52.9                   |                       |
| ENSG00000185507 | IRF7         | -0.72               |                    | -0.10               |                    | 51.5                |                    | 1.0                 |                    | 52.5                   |                       |
| ENSG00000243649 | CFB          | -0.70               |                    | 0.15                |                    | 49.1                |                    | 2.4                 |                    | 51.5                   |                       |
| ENSG00000135636 | DYSF         | -0.71               |                    | -0.11               |                    | 50.4                |                    | 1.2                 |                    | 51.5                   |                       |
| ENSG00000106976 | DNM1         | 0.67                |                    | -0.26               |                    | 44.5                |                    | 7.0                 |                    | 51.5                   |                       |
| ENSG00000103569 | AQP9         | -0.57               |                    | -0.44               |                    | 32.5                |                    | 19.0                |                    | 51.4                   |                       |
| ENSG00000196081 | ZNF724P      | 0.53                |                    | -0.48               |                    | 27.9                |                    | 23.4                |                    | 51.2                   |                       |
| ENSG00000139832 | RAB20        | -0.70               |                    | -0.16               |                    | 48.5                |                    | 2.7                 |                    | 51.2                   |                       |
| ENSG00000129673 | AANAT        | -0.71               |                    | -0.06               |                    | 50.8                |                    | 0.4                 |                    | 51.1                   |                       |
| ENSG00000253193 | FCGR1C       | -0.65               |                    | -0.29               |                    | 42.5                |                    | 8.7                 |                    | 51.1                   |                       |
| ENSG00000079263 | SP140        | -0.71               |                    | 0.05                |                    | 50.3                |                    | 0.2                 |                    | 50.5                   |                       |
| ENSG00000152778 | IFIT5        | -0.65               |                    | -0.29               |                    | 41.8                |                    | 8.6                 |                    | 50.3                   |                       |
| ENSG00000184500 | PROS1        | 0.22                |                    | -0.67               |                    | 4.9                 |                    | 45.4                |                    | 50.2                   |                       |
| ENSG00000135362 | PRR5L        | -0.65               |                    | -0.28               |                    | 42.3                |                    | 7.8                 |                    | 50.0                   |                       |
| ENSG00000196220 | SRGAP3       | 0.71                |                    | 0.04                |                    | 49.8                |                    | 0.2                 |                    | 50.0                   |                       |
| ENSG00000188820 | FAM26F       | -0.70               |                    | 0.06                |                    | 49.6                |                    | 0.4                 |                    | 50.0                   |                       |
| ENSG00000171621 | SPSB1        | -0.71               |                    | 0.01                |                    | 50.0                |                    | 0.0                 |                    | 50.0                   |                       |
| ENSG00000133106 | EPSTI1       | -0.70               |                    | -0.07               |                    | 49.4                |                    | 0.5                 |                    | 50.0                   |                       |
| ENSG00000071242 | RPS6KA2      | 0.69                |                    | 0.15                |                    | 47.4                |                    | 2.3                 |                    | 49.7                   |                       |
| ENSG00000121966 | CXCR4        | 0.68                |                    | -0.20               |                    | 45.8                |                    | 3.9                 |                    | 49.7                   |                       |
| ENSG00000169245 | CXCL10       | -0.70               |                    | -0.07               |                    | 48.8                |                    | 0.5                 |                    | 49.3                   |                       |
| ENSG00000226321 | AC104809.3   | 0.49                |                    | -0.50               |                    | 24.2                |                    | 25.0                |                    | 49.2                   |                       |
| ENSG00000111181 | SLC6A12      | -0.70               |                    | -0.02               |                    | 49.2                |                    | 0.0                 |                    | 49.2                   |                       |
| ENSG00000136960 | ENPP2        | -0.66               |                    | -0.24               |                    | 43.2                |                    | 5.9                 |                    | 49.1                   |                       |
| ENSG00000184313 | HEATR8       | 0.70                |                    | -0.05               |                    | 48.7                |                    | 0.3                 |                    | 49.0                   |                       |
| ENSG00000233392 | AC104809.4   | 0.23                |                    | -0.66               |                    | 5.5                 |                    | 43.0                |                    | 48.5                   |                       |
| ENSG00000116663 | FBXO6        | -0.69               |                    | -0.06               |                    | 48.1                |                    | 0.4                 |                    | 48.5                   |                       |
| ENSG00000234290 | AC116366.6   | -0.67               |                    | -0.20               |                    | 44.5                |                    | 3.9                 |                    | 48.4                   |                       |
| ENSG00000164308 | ERAP2        | -0.68               |                    | 0.14                |                    | 46.3                |                    | 2.0                 |                    | 48.3                   |                       |

| Gene ID         | Gene Name     | G1<br>(SV-<br>AS03) | G1<br>(SV-<br>PBS) | G2<br>(SV-<br>AS03) | G2<br>(SV-<br>PBS) | V1<br>(SV-<br>AS03) | V1<br>(SV-<br>PBS) | V2<br>(SV-<br>AS03) | V2<br>(SV-<br>PBS) | V1+V2<br>(SV-<br>AS03) | V1+V2<br>(SV-<br>PBS) |
|-----------------|---------------|---------------------|--------------------|---------------------|--------------------|---------------------|--------------------|---------------------|--------------------|------------------------|-----------------------|
| ENSG00000170581 | STAT2         | -0.68               |                    | -0.14               |                    | 46.3                |                    | 2.0                 |                    | 48.3                   |                       |
| ENSG00000162654 | GBP4          | -0.69               |                    | 0.01                |                    | 48.2                |                    | 0.0                 |                    | 48.2                   |                       |
| ENSG00000138821 | SLC39A8       | -0.67               |                    | -0.19               |                    | 44.5                |                    | 3.5                 |                    | 48.1                   |                       |
| ENSG00000131979 | GCH1          | -0.69               |                    | -0.09               |                    | 47.1                |                    | 0.9                 |                    | 48.0                   |                       |
| ENSG00000163840 | DTX3L         | -0.67               |                    | -0.16               |                    | 45.4                |                    | 2.5                 |                    | 48.0                   |                       |
| ENSG00000138496 | PARP9         | -0.68               |                    | -0.14               |                    | 45.9                |                    | 2.0                 |                    | 47.9                   |                       |
| ENSG00000226004 | RP11-10J5.1   | -0.69               |                    | -0.01               |                    | 47.8                |                    | 0.0                 |                    | 47.8                   |                       |
| ENSG00000138119 | MYOF          | -0.69               |                    | 0.00                |                    | 47.7                |                    | 0.0                 |                    | 47.7                   |                       |
| ENSG00000113368 | LMNB1         | -0.68               |                    | -0.09               |                    | 46.8                |                    | 0.8                 |                    | 47.7                   |                       |
| ENSG00000140511 | HAPLN3        | -0.69               |                    | -0.00               |                    | 47.5                |                    | 0.0                 |                    | 47.5                   |                       |
| ENSG00000179639 | FCER1A        | 0.67                |                    | -0.15               |                    | 45.1                |                    | 2.4                 |                    | 47.5                   |                       |
| ENSG00000072858 | SIDT1         | 0.69                |                    | 0.01                |                    | 47.4                |                    | 0.0                 |                    | 47.4                   |                       |
| ENSG00000136231 | IGF2BP3       | -0.68               |                    | 0.07                |                    | 46.7                |                    | 0.5                 |                    | 47.3                   |                       |
| ENSG00000105639 | JAK3          | -0.62               |                    | -0.29               |                    | 38.4                |                    | 8.6                 |                    | 47.0                   |                       |
| ENSG00000150337 | FCGR1A        | -0.64               |                    | -0.25               |                    | 40.8                |                    | 6.2                 |                    | 46.9                   |                       |
| ENSG00000002549 | LAP3          | -0.68               |                    | -0.07               |                    | 46.4                |                    | 0.4                 |                    | 46.9                   |                       |
| ENSG00000158714 | SLAMF8        | -0.65               |                    | -0.21               |                    | 42.2                |                    | 4.3                 |                    | 46.5                   |                       |
| ENSG00000133048 | CHI3L1        | -0.32               |                    | -0.60               |                    | 10.1                |                    | 36.4                |                    | 46.5                   |                       |
| ENSG00000059378 | PARP12        | -0.68               |                    | 0.00                |                    | 46.5                |                    | 0.0                 |                    | 46.5                   |                       |
| ENSG00000132274 | TRIM22        | -0.68               |                    | -0.06               |                    | 46.1                |                    | 0.3                 |                    | 46.5                   |                       |
| ENSG00000162337 | LRP5          | 0.68                |                    | 0.03                |                    | 46.3                |                    | 0.1                 |                    | 46.4                   |                       |
| ENSG00000028116 | VRK2          | -0.66               |                    | 0.17                |                    | 43.6                |                    | 2.8                 |                    | 46.4                   |                       |
| ENSG00000162614 | NEXN          | -0.67               |                    | 0.09                |                    | 45.5                |                    | 0.8                 |                    | 46.4                   |                       |
| ENSG00000198019 | FCGR1B        | -0.63               |                    | -0.26               |                    | 39.3                |                    | 7.0                 |                    | 46.3                   |                       |
| ENSG00000163814 | CDCP1         | -0.67               |                    | -0.10               |                    | 45.3                |                    | 1.1                 |                    | 46.3                   |                       |
| ENSG00000171766 | GATM          | 0.55                |                    | 0.40                |                    | 30.5                |                    | 15.7                |                    | 46.2                   |                       |
| ENSG00000099377 | HSD3B7        | -0.57               |                    | -0.36               |                    | 32.8                |                    | 13.3                |                    | 46.1                   |                       |
| ENSG00000128335 | APOL2         | -0.67               |                    | -0.08               |                    | 45.3                |                    | 0.7                 |                    | 46.1                   |                       |
| ENSG00000254859 | RP11-661A12.5 | -0.68               |                    | -0.01               |                    | 46.0                |                    | 0.0                 |                    | 46.0                   |                       |
| ENSG00000140464 | PML           | -0.68               |                    | -0.03               |                    | 45.9                |                    | 0.1                 |                    | 45.9                   |                       |
| ENSG00000169313 | P2RY12        | -0.66               |                    | 0.13                |                    | 44.2                |                    | 1.7                 |                    | 45.9                   |                       |
| ENSG00000173193 | PARP14        | -0.67               |                    | -0.10               |                    | 44.7                |                    | 1.0                 |                    | 45.7                   |                       |
| ENSG00000020577 | SAMD4A        | -0.68               |                    | 0.03                |                    | 45.6                |                    | 0.1                 |                    | 45.7                   |                       |
| ENSG00000152580 | IGSF10        | 0.56                |                    | -0.37               |                    | 31.6                |                    | 13.6                |                    | 45.2                   |                       |
| ENSG00000171954 | CYP4F22       | -0.44               |                    | -0.50               |                    | 19.7                |                    | 25.1                |                    | 44.8                   |                       |
| ENSG00000108387 | SEPT4         | -0.67               |                    | -0.06               |                    | 44.5                |                    | 0.3                 |                    | 44.8                   |                       |
| ENSG00000123240 | OPTN          | -0.65               |                    | 0.17                |                    | 41.8                |                    | 2.9                 |                    | 44.7                   |                       |
| ENSG0000010030  | ETV7          | -0.67               |                    | -0.04               |                    | 44.5                |                    | 0.1                 |                    | 44.7                   |                       |
| ENSG00000130487 | KLHDC7B       | -0.67               |                    | 0.01                |                    | 44.4                |                    | 0.0                 |                    | 44.4                   |                       |
| ENSG00000117228 | GBP1          | -0.66               |                    | -0.07               |                    | 43.9                |                    | 0.5                 |                    | 44.4                   |                       |
| ENSG00000238000 | RP11-274E7.2  | -0.66               |                    | 0.09                |                    | 43.4                |                    | 0.8                 |                    | 44.2                   |                       |
| ENSG00000244642 | AP005717.1    | -0.62               |                    | 0.24                |                    | 38.4                |                    | 5.8                 |                    | 44.2                   |                       |
| ENSG00000150347 | ARID5B        | -0.62               |                    | -0.23               |                    | 38.7                |                    | 5.2                 |                    | 43.9                   |                       |
| ENSG00000170955 | PRKCDBP       | 0.60                |                    | -0.28               |                    | 35.7                |                    | 8.0                 |                    | 43.7                   |                       |
| ENSG00000119922 | IFIT2         | -0.66               |                    | -0.06               |                    | 43.0                |                    | 0.3                 |                    | 43.3                   |                       |
| ENSG00000146072 | TNFRSF21      | 0.66                |                    | -0.03               |                    | 43.0                |                    | 0.1                 |                    | 43.1                   |                       |
| ENSG00000148175 | STOM          | -0.64               |                    | -0.14               |                    | 40.9                |                    | 2.0                 |                    | 42.9                   |                       |
| ENSG00000134470 | IL15RA        | -0.65               |                    | -0.04               |                    | 42.4                |                    | 0.2                 |                    | 42.6                   |                       |
| ENSG00000128203 | ASPHD2        | -0.64               |                    | 0.14                |                    | 40.5                |                    | 2.0                 |                    | 42.5                   |                       |
| ENSG00000055130 | CUL1          | -0.65               |                    | 0.02                |                    | 42.4                |                    | 0.0                 |                    | 42.5                   |                       |
| ENSG00000128284 | APOL3         | -0.65               |                    | 0.03                |                    | 42.2                |                    | 0.1                 |                    | 42.3                   |                       |

| Gene ID         | Gene Name         | G1<br>(SV-<br>AS03) | G1<br>(SV-<br>PBS) | G2<br>(SV-<br>AS03) | G2<br>(SV-<br>PBS) | V1<br>(SV-<br>AS03) | V1<br>(SV-<br>PBS) | V2<br>(SV-<br>AS03) | V2<br>(SV-<br>PBS) | V1+V2<br>(SV-<br>AS03) | V1+V2<br>(SV-<br>PBS) |
|-----------------|-------------------|---------------------|--------------------|---------------------|--------------------|---------------------|--------------------|---------------------|--------------------|------------------------|-----------------------|
| ENSG00000168685 | IL7R              | 0.52                |                    | 0.38                |                    | 27.4                |                    | 14.6                |                    | 42.0                   |                       |
| ENSG00000154451 | GBP5              | -0.65               |                    | -0.02               |                    | 41.9                |                    | 0.0                 |                    | 42.0                   |                       |
| ENSG00000137193 | PIM1              | -0.65               |                    | 0.02                |                    | 41.9                |                    | 0.1                 |                    | 41.9                   |                       |
| ENSG00000242616 | GNG10             | -0.53               |                    | -0.37               |                    | 28.4                |                    | 13.3                |                    | 41.7                   |                       |
| ENSG00000164715 | LMTK2             | -0.63               |                    | -0.16               |                    | 39.3                |                    | 2.4                 |                    | 41.7                   |                       |
| ENSG00000177732 | SOX12             | 0.60                |                    | 0.25                |                    | 35.5                |                    | 6.0                 |                    | 41.6                   |                       |
| ENSG00000107282 | APBA1             | 0.60                |                    | -0.22               |                    | 36.6                |                    | 5.0                 |                    | 41.5                   |                       |
| ENSG00000138166 | DUSP5             | -0.63               |                    | -0.12               |                    | 39.8                |                    | 1.4                 |                    | 41.3                   |                       |
| ENSG00000173821 | RNF213            | -0.64               |                    | -0.00               |                    | 41.2                |                    | 0.0                 |                    | 41.2                   |                       |
| ENSG00000142798 | HSPG2             | 0.50                |                    | -0.40               |                    | 24.9                |                    | 16.3                |                    | 41.2                   |                       |
| ENSG00000231528 | NCRNA00256A       | -0.63               |                    | -0.11               |                    | 39.9                |                    | 1.2                 |                    | 41.1                   |                       |
| ENSG00000168016 | TRANK1            | -0.63               |                    | -0.07               |                    | 40.2                |                    | 0.4                 |                    | 40.6                   |                       |
| ENSG00000182580 | EPHB3             | 0.63                |                    | -0.12               |                    | 39.1                |                    | 1.5                 |                    | 40.6                   |                       |
| ENSG00000174749 | C4orf32           | -0.59               |                    | -0.25               |                    | 34.5                |                    | 6.0                 |                    | 40.5                   |                       |
| ENSG00000129244 | ATP1B2            | -0.45               |                    | -0.45               |                    | 19.9                |                    | 20.5                |                    | 40.5                   |                       |
| ENSG00000203814 | HIST2H2BF         | -0.57               |                    | -0.29               |                    | 32.2                |                    | 8.3                 |                    | 40.5                   |                       |
| ENSG00000144668 | ITGA9             | 0.63                |                    | -0.05               |                    | 40.0                |                    | 0.2                 |                    | 40.2                   |                       |
| ENSG00000163606 | CD200R1           | 0.53                |                    | 0.35                |                    | 27.8                |                    | 12.3                |                    | 40.1                   |                       |
| ENSG00000117226 | GBP3              | -0.63               |                    | -0.07               |                    | 39.6                |                    | 0.5                 |                    | 40.1                   |                       |
| ENSG00000175322 | ZNF519            | 0.59                |                    | -0.23               |                    | 34.7                |                    | 5.4                 |                    | 40.0                   |                       |
| ENSG00000234571 | RP5-998N21.4      | -0.51               |                    | -0.38               |                    | 25.9                |                    | 14.2                |                    | 40.0                   |                       |
| ENSG00000225492 | GBP1P1            | -0.63               |                    | -0.07               |                    | 39.4                |                    | 0.5                 |                    | 40.0                   |                       |
| ENSG00000175445 | LPL               | 0.61                |                    | -0.14               |                    | 37.6                |                    | 2.0                 |                    | 39.6                   |                       |
| ENSG00000138134 | STAMBPL1          | -0.63               |                    | 0.01                |                    | 39.6                |                    | 0.0                 |                    | 39.6                   |                       |
| ENSG00000168394 | TAP1              | -0.63               |                    | -0.04               |                    | 39.1                |                    | 0.2                 |                    | 39.3                   |                       |
| ENSG00000122420 | PTGFR             | -0.23               |                    | -0.58               |                    | 5.3                 |                    | 33.9                |                    | 39.3                   |                       |
| ENSG00000162645 | GBP2              | -0.63               |                    | -0.01               |                    | 39.1                |                    | 0.0                 |                    | 39.1                   |                       |
| ENSG00000075399 | C16orf7           | -0.60               |                    | -0.17               |                    | 36.1                |                    | 2.9                 |                    | 38.9                   |                       |
| ENSG00000109819 | PPARGC1A          | 0.62                |                    | -0.06               |                    | 38.5                |                    | 0.4                 |                    | 38.9                   |                       |
| ENSG00000112290 | WASF1             | -0.38               |                    | -0.50               |                    | 14.1                |                    | 24.5                |                    | 38.6                   |                       |
| ENSG00000156535 | CD109             | 0.60                |                    | 0.15                |                    | 36.1                |                    | 2.2                 |                    | 38.3                   |                       |
| ENSG00000234518 | RP5-837D10.2      | -0.62               |                    | 0.05                |                    | 38.0                |                    | 0.2                 |                    | 38.2                   |                       |
| ENSG00000185499 | MUC1              | -0.62               |                    | -0.06               |                    | 37.8                |                    | 0.3                 |                    | 38.1                   |                       |
| ENSG00000115415 | STAT1             | -0.61               |                    | -0.08               |                    | 37.4                |                    | 0.6                 |                    | 38.0                   |                       |
| ENSG00000255045 | RP11-677M14.2-001 | 0.21                |                    | 0.58                |                    | 4.5                 |                    | 33.5                |                    | 37.9                   |                       |
| ENSG00000127585 | FBXL16            | 0.60                |                    | 0.14                |                    | 35.5                |                    | 1.9                 |                    | 37.3                   |                       |
| ENSG00000120217 | CD274             | -0.59               |                    | -0.12               |                    | 35.4                |                    | 1.5                 |                    | 36.8                   |                       |
| ENSG00000140105 | WARS              | -0.60               |                    | -0.11               |                    | 35.5                |                    | 1.3                 |                    | 36.8                   |                       |
| ENSG00000140859 | KIFC3             | -0.15               |                    | -0.59               |                    | 2.1                 |                    | 34.6                |                    | 36.7                   |                       |
| ENSG00000118513 | MYB               | 0.42                |                    | 0.43                |                    | 17.9                |                    | 18.7                |                    | 36.5                   |                       |
| ENSG00000211899 | IGHM              | -0.60               |                    | 0.03                |                    | 36.3                |                    | 0.1                 |                    | 36.4                   |                       |
| ENSG00000182118 | FAM89A            | -0.60               |                    | -0.09               |                    | 35.4                |                    | 0.8                 |                    | 36.2                   |                       |
| ENSG00000179750 | APOBEC3B          | -0.52               |                    | 0.30                |                    | 27.1                |                    | 9.0                 |                    | 36.1                   |                       |
| ENSG00000197121 | PGAP1             | -0.59               |                    | 0.11                |                    | 34.9                |                    | 1.2                 |                    | 36.1                   |                       |
| ENSG00000229644 | NAMPTL            | -0.50               |                    | -0.33               |                    | 24.8                |                    | 11.0                |                    | 35.9                   |                       |
| ENSG00000164509 | IL31RA            | -0.59               |                    | -0.11               |                    | 34.2                |                    | 1.1                 |                    | 35.4                   |                       |
| ENSG00000142303 | ADAMTS10          | 0.59                |                    | 0.10                |                    | 34.3                |                    | 1.0                 |                    | 35.3                   |                       |
| ENSG00000166532 | RIMKLB            | -0.59               |                    | -0.04               |                    | 35.2                |                    | 0.2                 |                    | 35.3                   |                       |
| ENSG00000247275 | AL160008.1        | -0.59               |                    | 0.08                |                    | 34.5                |                    | 0.7                 |                    | 35.3                   |                       |
| ENSG00000170525 | PFKFB3            | -0.59               |                    | -0.01               |                    | 35.2                |                    | 0.0                 |                    | 35.2                   |                       |
| ENSG00000139211 | AMIGO2            | -0.51               |                    | 0.31                |                    | 25.6                |                    | 9.6                 |                    | 35.2                   |                       |

| Gene ID         | Gene Name     | G1<br>(SV-<br>AS03) | G1<br>(SV-<br>PBS) | G2<br>(SV-<br>AS03) | G2<br>(SV-<br>PBS) | V1<br>(SV-<br>AS03) | V1<br>(SV-<br>PBS) | V2<br>(SV-<br>AS03) | V2<br>(SV-<br>PBS) | V1+V2<br>(SV-<br>AS03) | V1+V2<br>(SV-<br>PBS) |
|-----------------|---------------|---------------------|--------------------|---------------------|--------------------|---------------------|--------------------|---------------------|--------------------|------------------------|-----------------------|
| ENSG00000145365 | TIFA          | -0.58               |                    | -0.09               |                    | 34.1                |                    | 0.9                 |                    | 35.0                   |                       |
| ENSG00000124216 | SNAI1         | 0.49                |                    | 0.33                |                    | 23.9                |                    | 11.0                |                    | 35.0                   |                       |
| ENSG00000103528 | SYT17         | 0.56                |                    | -0.20               |                    | 31.0                |                    | 3.8                 |                    | 34.9                   |                       |
| ENSG00000163485 | ADORA1        | 0.54                |                    | -0.23               |                    | 29.3                |                    | 5.3                 |                    | 34.7                   |                       |
| ENSG00000131355 | EMR3          | 0.58                |                    | -0.08               |                    | 34.0                |                    | 0.7                 |                    | 34.6                   |                       |
| ENSG00000257017 | HP            | -0.53               |                    | -0.26               |                    | 28.0                |                    | 6.5                 |                    | 34.5                   |                       |
| ENSG00000243181 | RP11-734J24.1 | 0.40                |                    | 0.43                |                    | 15.6                |                    | 18.7                |                    | 34.4                   |                       |
| ENSG00000143847 | PPFIA4        | 0.57                |                    | 0.11                |                    | 33.0                |                    | 1.3                 |                    | 34.3                   |                       |
| ENSG00000029153 | ARNTL2        | -0.58               |                    | 0.05                |                    | 33.8                |                    | 0.3                 |                    | 34.1                   |                       |
| ENSG00000187474 | FPR3          | 0.56                |                    | -0.17               |                    | 30.9                |                    | 3.0                 |                    | 33.9                   |                       |
| ENSG00000198569 | SLC34A3       | 0.25                |                    | -0.52               |                    | 6.5                 |                    | 27.3                |                    | 33.7                   |                       |
| ENSG00000140379 | BCL2A1        | -0.58               |                    | -0.06               |                    | 33.3                |                    | 0.4                 |                    | 33.7                   |                       |
| ENSG00000134755 | DSC2          | -0.41               |                    | -0.40               |                    | 17.1                |                    | 16.0                |                    | 33.1                   |                       |
| ENSG00000073111 | MCM2          | 0.32                |                    | -0.48               |                    | 10.1                |                    | 22.7                |                    | 32.8                   |                       |
| ENSG00000169750 | RAC3          | 0.08                |                    | 0.56                |                    | 0.6                 |                    | 31.8                |                    | 32.4                   |                       |
| ENSG00000116717 | GADD45A       | 0.55                |                    | 0.16                |                    | 29.7                |                    | 2.7                 |                    | 32.4                   |                       |
| ENSG00000090975 | PITPNM2       | 0.49                |                    | -0.30               |                    | 23.6                |                    | 8.7                 |                    | 32.4                   |                       |
| ENSG00000111371 | SLC38A1       | 0.51                |                    | 0.24                |                    | 26.5                |                    | 5.8                 |                    | 32.3                   |                       |
| ENSG00000182541 | LIMK2         | -0.55               |                    | -0.15               |                    | 30.0                |                    | 2.2                 |                    | 32.1                   |                       |
| ENSG00000233029 | RP11-439A17.9 | -0.53               |                    | -0.19               |                    | 28.2                |                    | 3.7                 |                    | 31.8                   |                       |
| ENSG00000115419 | GLS           | -0.56               |                    | -0.10               |                    | 30.9                |                    | 0.9                 |                    | 31.8                   |                       |
| ENSG00000167767 | KRT80         | 0.47                |                    | -0.30               |                    | 22.4                |                    | 9.2                 |                    | 31.6                   |                       |
| ENSG00000013374 | NUB1          | -0.56               |                    | -0.07               |                    | 31.0                |                    | 0.5                 |                    | 31.5                   |                       |
| ENSG00000183762 | KREMEN1       | -0.54               |                    | -0.16               |                    | 28.8                |                    | 2.6                 |                    | 31.4                   |                       |
| ENSG00000174080 | CTSF          | 0.34                |                    | 0.45                |                    | 11.4                |                    | 19.9                |                    | 31.2                   |                       |
| ENSG00000100336 | APOL4         | -0.56               |                    | 0.02                |                    | 31.0                |                    | 0.0                 |                    | 31.1                   |                       |
| ENSG00000172232 | AZU1          | 0.55                |                    | 0.07                |                    | 30.5                |                    | 0.5                 |                    | 31.0                   |                       |
| ENSG00000184221 | OLIG1         | 0.54                |                    | 0.14                |                    | 28.9                |                    | 1.9                 |                    | 30.8                   |                       |
| ENSG00000179715 | FAM113B       | -0.53               |                    | 0.15                |                    | 28.5                |                    | 2.1                 |                    | 30.6                   |                       |
| ENSG00000151623 | NR3C2         | 0.51                |                    | 0.21                |                    | 26.2                |                    | 4.4                 |                    | 30.6                   |                       |
| ENSG00000252206 | RNU7-40P      | -0.38               |                    | -0.40               |                    | 14.1                |                    | 16.4                |                    | 30.4                   |                       |
| ENSG00000214872 | SMTNL1        | -0.55               |                    | -0.04               |                    | 30.3                |                    | 0.1                 |                    | 30.4                   |                       |
| ENSG00000174370 | C11orf45      | 0.55                |                    | -0.07               |                    | 29.8                |                    | 0.5                 |                    | 30.3                   |                       |
| ENSG00000221963 | APOL6         | -0.54               |                    | -0.10               |                    | 29.3                |                    | 0.9                 |                    | 30.3                   |                       |
| ENSG00000111696 | NT5DC3        | 0.54                |                    | -0.11               |                    | 29.0                |                    | 1.2                 |                    | 30.2                   |                       |
| ENSG00000246203 | RP11-29H23.5  | -0.46               |                    | 0.28                |                    | 21.3                |                    | 8.0                 |                    | 29.3                   |                       |
| ENSG00000109099 | PMP22         | 0.53                |                    | 0.06                |                    | 28.6                |                    | 0.4                 |                    | 29.0                   |                       |
| ENSG00000151693 | ASAP2         | -0.53               |                    | -0.10               |                    | 27.7                |                    | 1.1                 |                    | 28.8                   |                       |
| ENSG00000179593 | ALOX15B       | 0.50                |                    | -0.19               |                    | 24.9                |                    | 3.7                 |                    | 28.6                   |                       |
| ENSG00000105516 | DBP           | 0.52                |                    | 0.13                |                    | 27.0                |                    | 1.6                 |                    | 28.6                   |                       |
| ENSG00000162894 | FAIM3         | -0.04               |                    | 0.53                |                    | 0.2                 |                    | 27.8                |                    | 28.0                   |                       |
| ENSG00000149927 | DOC2A         | 0.52                |                    | 0.11                |                    | 26.7                |                    | 1.2                 |                    | 27.9                   |                       |
| ENSG00000188549 | C15orf52      | 0.47                |                    | 0.23                |                    | 22.5                |                    | 5.2                 |                    | 27.8                   |                       |
| ENSG00000242797 | RP11-168J18.4 | -0.52               |                    | 0.07                |                    | 26.8                |                    | 0.5                 |                    | 27.3                   |                       |
| ENSG00000108244 | KRT23         | 0.30                |                    | 0.43                |                    | 9.0                 |                    | 18.2                |                    | 27.2                   |                       |
| ENSG00000205846 | CLEC6A        | -0.51               |                    | -0.09               |                    | 26.3                |                    | 0.9                 |                    | 27.1                   |                       |
| ENSG00000135604 | STX11         | -0.52               |                    | -0.02               |                    | 26.9                |                    | 0.0                 |                    | 26.9                   |                       |
| ENSG00000119986 | AVPI1         | 0.48                |                    | -0.20               |                    | 22.6                |                    | 3.9                 |                    | 26.5                   |                       |
| ENSG00000254838 | GVINP1        | -0.51               |                    | 0.02                |                    | 26.4                |                    | 0.0                 |                    | 26.5                   |                       |
| ENSG00000197272 | IL27          | -0.43               |                    | -0.28               |                    | 18.6                |                    | 7.8                 |                    | 26.5                   |                       |
| ENSG00000183780 | SLC35F3       | 0.50                |                    | -0.09               |                    | 25.3                |                    | 0.9                 |                    | 26.2                   |                       |

| Gene ID         | Gene Name    | G1<br>(SV-<br>AS03) | G1<br>(SV-<br>PBS) | G2<br>(SV-<br>AS03) | G2<br>(SV-<br>PBS) | V1<br>(SV-<br>AS03) | V1<br>(SV-<br>PBS) | V2<br>(SV-<br>AS03) | V2<br>(SV-<br>PBS) | V1+V2<br>(SV-<br>AS03) | V1+V2<br>(SV-<br>PBS) |
|-----------------|--------------|---------------------|--------------------|---------------------|--------------------|---------------------|--------------------|---------------------|--------------------|------------------------|-----------------------|
| ENSG00000188385 | JAKMIP3      | 0.25                |                    | 0.44                |                    | 6.2                 |                    | 19.6                |                    | 25.7                   |                       |
| ENSG00000096968 | JAK2         | -0.51               |                    | 0.00                |                    | 25.7                |                    | 0.0                 |                    | 25.7                   |                       |
| ENSG00000167680 | SEMA6B       | -0.19               |                    | -0.47               |                    | 3.6                 |                    | 22.0                |                    | 25.5                   |                       |
| ENSG00000114127 | XRN1         | -0.49               |                    | -0.13               |                    | 23.8                |                    | 1.7                 |                    | 25.5                   |                       |
| ENSG00000168209 | DDIT4        | 0.25                |                    | 0.44                |                    | 6.3                 |                    | 19.1                |                    | 25.3                   |                       |
| ENSG00000008441 | NFIX         | -0.50               |                    | 0.02                |                    | 25.2                |                    | 0.1                 |                    | 25.2                   |                       |
| ENSG00000111186 | WNT5B        | 0.44                |                    | 0.23                |                    | 19.7                |                    | 5.3                 |                    | 24.9                   |                       |
| ENSG00000151726 | ACSL1        | -0.42               |                    | -0.26               |                    | 17.6                |                    | 7.0                 |                    | 24.5                   |                       |
| ENSG00000087237 | CETP         | -0.47               |                    | -0.16               |                    | 21.9                |                    | 2.6                 |                    | 24.5                   |                       |
| ENSG00000166405 | RIC3         | -0.21               |                    | -0.44               |                    | 4.5                 |                    | 19.7                |                    | 24.3                   |                       |
| ENSG00000229759 | MRPS18AP1    | 0.48                |                    | -0.11               |                    | 23.0                |                    | 1.3                 |                    | 24.3                   |                       |
| ENSG00000099834 | CDHR5        | -0.48               |                    | -0.11               |                    | 22.9                |                    | 1.1                 |                    | 24.1                   |                       |
| ENSG00000248487 | ABHD14A      | 0.28                |                    | 0.40                |                    | 7.7                 |                    | 15.9                |                    | 23.7                   |                       |
| ENSG00000187912 | CLEC17A      | 0.39                |                    | 0.28                |                    | 15.4                |                    | 7.8                 |                    | 23.2                   |                       |
| ENSG00000158156 | XKR8         | -0.42               |                    | -0.18               |                    | 17.9                |                    | 3.1                 |                    | 21.0                   |                       |
| ENSG00000163251 | FZD5         | -0.41               |                    | -0.20               |                    | 16.8                |                    | 3.8                 |                    | 20.6                   |                       |
| ENSG00000165795 | NDRG2        | 0.40                |                    | -0.21               |                    | 16.2                |                    | 4.4                 |                    | 20.6                   |                       |
| ENSG00000112096 | SOD2         | -0.39               |                    | -0.22               |                    | 15.5                |                    | 4.7                 |                    | 20.2                   |                       |
| ENSG00000130595 | TNNT3        | 0.44                |                    | 0.09                |                    | 19.2                |                    | 0.7                 |                    | 19.9                   |                       |
| ENSG00000213949 | ITGA1        | -0.43               |                    | -0.13               |                    | 18.1                |                    | 1.7                 |                    | 19.8                   |                       |
| ENSG00000184557 | SOCS3        | -0.38               |                    | 0.23                |                    | 14.5                |                    | 5.2                 |                    | 19.7                   |                       |
| ENSG00000181036 | FCRL6        | -0.42               |                    | -0.13               |                    | 17.9                |                    | 1.7                 |                    | 19.6                   |                       |
| ENSG00000253368 | TRNP1        | 0.41                |                    | -0.15               |                    | 16.6                |                    | 2.2                 |                    | 18.9                   |                       |
| ENSG00000148926 | ADM          | -0.36               |                    | -0.23               |                    | 13.2                |                    | 5.2                 |                    | 18.4                   |                       |
| ENSG00000179388 | EGR3         | -0.28               |                    | -0.32               |                    | 7.8                 |                    | 10.3                |                    | 18.1                   |                       |
| ENSG00000125347 | IRF1         | -0.42               |                    | 0.01                |                    | 17.9                |                    | 0.0                 |                    | 17.9                   |                       |
| ENSG00000253882 | RP11-61L23.2 | -0.38               |                    | 0.18                |                    | 14.5                |                    | 3.4                 |                    | 17.9                   |                       |
| ENSG00000154102 | C16orf74     | 0.42                |                    | -0.02               |                    | 17.8                |                    | 0.0                 |                    | 17.9                   |                       |
| ENSG00000152229 | PSTPIP2      | -0.37               |                    | -0.18               |                    | 14.0                |                    | 3.4                 |                    | 17.4                   |                       |
| ENSG00000222179 | 7SK_222179   | -0.24               |                    | -0.33               |                    | 5.7                 |                    | 10.8                |                    | 16.5                   |                       |
| ENSG00000140853 | NLRC5        | -0.37               |                    | -0.14               |                    | 14.0                |                    | 2.1                 |                    | 16.0                   |                       |
| ENSG00000180644 | PRF1         | 0.39                |                    | -0.03               |                    | 15.6                |                    | 0.1                 |                    | 15.7                   |                       |
| ENSG00000196549 | MME          | 0.37                |                    | -0.14               |                    | 13.7                |                    | 1.9                 |                    | 15.6                   |                       |
| ENSG00000254017 | IGHEP2       | -0.32               |                    | 0.22                |                    | 10.1                |                    | 4.7                 |                    | 14.8                   |                       |
| ENSG00000083454 | P2RX5        | -0.36               |                    | 0.13                |                    | 12.8                |                    | 1.8                 |                    | 14.7                   |                       |
| ENSG00000254521 | SIGLEC12     | -0.33               |                    | -0.16               |                    | 11.0                |                    | 2.6                 |                    | 13.6                   |                       |
| ENSG00000057294 | PKP2         | 0.23                |                    | -0.28               |                    | 5.2                 |                    | 7.9                 |                    | 13.2                   |                       |
| ENSG00000125538 | IL1B         | 0.26                |                    | -0.25               |                    | 6.6                 |                    | 6.2                 |                    | 12.8                   |                       |
| ENSG00000103485 | QPRT         | 0.29                |                    | 0.20                |                    | 8.4                 |                    | 4.0                 |                    | 12.4                   |                       |
| ENSG00000182048 | TRPC2        | -0.10               |                    | -0.34               |                    | 0.9                 |                    | 11.4                |                    | 12.3                   |                       |
| ENSG00000158715 | SLC45A3      | 0.29                |                    | -0.19               |                    | 8.4                 |                    | 3.7                 |                    | 12.1                   |                       |
| ENSG00000256579 | AC135776.2   | -0.24               |                    | -0.25               |                    | 5.5                 |                    | 6.5                 |                    | 12.0                   |                       |
| ENSG00000134769 | DTNA         | 0.33                |                    | 0.05                |                    | 10.9                |                    | 0.2                 |                    | 11.2                   |                       |
| ENSG00000164292 | RHOBTB3      | -0.30               |                    | -0.15               |                    | 9.0                 |                    | 2.1                 |                    | 11.1                   |                       |
| ENSG00000116544 | DLGAP3       | 0.29                |                    | 0.16                |                    | 8.4                 |                    | 2.5                 |                    | 10.9                   |                       |
| ENSG00000154997 | SEPT14       | 0.19                |                    | -0.27               |                    | 3.5                 |                    | 7.4                 |                    | 10.8                   |                       |
| ENSG00000176749 | CDK5R1       | 0.31                |                    | -0.10               |                    | 9.7                 |                    | 1.1                 |                    | 10.8                   |                       |
| ENSG00000241360 | PDXP         | 0.06                |                    | -0.32               |                    | 0.4                 |                    | 10.2                |                    | 10.6                   |                       |
| ENSG00000248936 | RP11-36B15.1 | 0.24                |                    | -0.22               |                    | 5.8                 |                    | 4.8                 |                    | 10.6                   |                       |
| ENSG00000135476 | ESPL1        | -0.25               |                    | 0.21                |                    | 6.2                 |                    | 4.3                 |                    | 10.5                   |                       |
| ENSG00000105835 | NAMPT        | -0.27               |                    | -0.16               |                    | 7.1                 |                    | 2.7                 |                    | 9.7                    |                       |

| Gene ID         | Gene Name     | G1<br>(SV-<br>AS03) | G1<br>(SV-<br>PBS) | G2<br>(SV-<br>AS03) | G2<br>(SV-<br>PBS) | V1<br>(SV-<br>AS03) | V1<br>(SV-<br>PBS) | V2<br>(SV-<br>AS03) | V2<br>(SV-<br>PBS) | V1+V2<br>(SV-<br>AS03) | V1+V2<br>(SV-<br>PBS) |
|-----------------|---------------|---------------------|--------------------|---------------------|--------------------|---------------------|--------------------|---------------------|--------------------|------------------------|-----------------------|
| ENSG00000228166 | RP11-39K24.11 | 0.26                |                    | 0.16                |                    | 6.9                 |                    | 2.5                 |                    | 9.4                    |                       |
| ENSG00000110848 | CD69          | -0.14               |                    | 0.26                |                    | 2.1                 |                    | 7.0                 |                    | 9.0                    |                       |
| ENSG00000122877 | EGR2          | -0.23               |                    | -0.19               |                    | 5.1                 |                    | 3.5                 |                    | 8.7                    |                       |
| ENSG00000236254 | RP11-39K24.8  | -0.21               |                    | -0.20               |                    | 4.5                 |                    | 3.9                 |                    | 8.4                    |                       |
| ENSG00000255221 | CARD17        | -0.26               |                    | 0.12                |                    | 6.7                 |                    | 1.6                 |                    | 8.3                    |                       |
| ENSG00000255398 | GPR109B       | 0.24                |                    | -0.15               |                    | 5.9                 |                    | 2.3                 |                    | 8.2                    |                       |
| ENSG00000136848 | DAB2IP        | -0.28               |                    | 0.03                |                    | 7.9                 |                    | 0.1                 |                    | 8.0                    |                       |
| ENSG00000227730 | MTND6P5       | -0.07               |                    | 0.27                |                    | 0.4                 |                    | 7.5                 |                    | 8.0                    |                       |
| ENSG00000182782 | GPR109A       | 0.19                |                    | -0.20               |                    | 3.8                 |                    | 3.9                 |                    | 7.7                    |                       |
| ENSG00000235917 | RP11-39K24.14 | -0.27               |                    | 0.01                |                    | 7.6                 |                    | 0.0                 |                    | 7.6                    |                       |
| ENSG00000254528 | RP11-728F11.4 | 0.07                |                    | -0.25               |                    | 0.6                 |                    | 6.4                 |                    | 6.9                    |                       |
| ENSG00000173762 | CD7           | -0.18               |                    | 0.20                |                    | 3.1                 |                    | 3.8                 |                    | 6.9                    |                       |
| ENSG00000236567 | RP11-39K24.7  | -0.18               |                    | 0.18                |                    | 3.1                 |                    | 3.3                 |                    | 6.4                    |                       |
| ENSG00000204228 | HSD17B8       | 0.21                |                    | -0.14               |                    | 4.5                 |                    | 1.9                 |                    | 6.4                    |                       |
| ENSG00000203804 | C1orf138      | -0.13               |                    | 0.20                |                    | 1.6                 |                    | 3.8                 |                    | 5.4                    |                       |
| ENSG00000251390 | RP11-276A18.2 | 0.23                |                    | -0.02               |                    | 5.1                 |                    | 0.1                 |                    | 5.2                    |                       |
| ENSG00000101280 | ANGPT4        | 0.19                |                    | 0.10                |                    | 3.8                 |                    | 1.1                 |                    | 4.9                    |                       |
| ENSG00000056661 | PCGF2         | 0.20                |                    | 0.09                |                    | 4.0                 |                    | 0.7                 |                    | 4.7                    |                       |
| ENSG00000237711 | RP11-39K24.13 | -0.20               |                    | 0.08                |                    | 4.0                 |                    | 0.6                 |                    | 4.7                    |                       |
| ENSG00000232229 | RP11-248C1.2  | 0.08                |                    | 0.20                |                    | 0.6                 |                    | 4.1                 |                    | 4.6                    |                       |
| ENSG00000224745 | RP11-380G5.2  | 0.21                |                    | -0.06               |                    | 4.2                 |                    | 0.3                 |                    | 4.6                    |                       |
| ENSG00000228097 | RP11-39K24.12 | -0.09               |                    | 0.19                |                    | 0.8                 |                    | 3.5                 |                    | 4.3                    |                       |
| ENSG00000177586 | RP11-113C12.5 | -0.16               |                    | 0.12                |                    | 2.7                 |                    | 1.5                 |                    | 4.2                    |                       |
| ENSG00000124225 | PMEPA1        | -0.18               |                    | 0.09                |                    | 3.2                 |                    | 0.9                 |                    | 4.1                    |                       |
| ENSG00000230138 | RP11-117D22.2 | 0.08                |                    | -0.18               |                    | 0.7                 |                    | 3.2                 |                    | 3.8                    |                       |
| ENSG00000185022 | MAFF          | 0.00                |                    | -0.19               |                    | 0.0                 |                    | 3.5                 |                    | 3.5                    |                       |
| ENSG00000163629 | PTPN13        | -0.13               |                    | 0.12                |                    | 1.6                 |                    | 1.4                 |                    | 3.1                    |                       |
| ENSG00000224083 | RP11-39K24.4  | -0.17               |                    | 0.04                |                    | 2.8                 |                    | 0.2                 |                    | 3.0                    |                       |
| ENSG00000139174 | PRICKLE1      | 0.04                |                    | 0.16                |                    | 0.2                 |                    | 2.5                 |                    | 2.6                    |                       |
| ENSG00000160298 | C21orf58      | 0.09                |                    | 0.11                |                    | 0.9                 |                    | 1.1                 |                    | 2.0                    |                       |
| ENSG00000162772 | ATF3          | 0.13                |                    | 0.06                |                    | 1.6                 |                    | 0.3                 |                    | 2.0                    |                       |
| ENSG00000238042 | RP11-815M8.1  | -0.08               |                    | -0.06               |                    | 0.6                 |                    | 0.4                 |                    | 1.0                    |                       |
| ENSG00000223534 | HLA-DQB1-AS1  | -0.03               |                    | -0.05               |                    | 0.1                 |                    | 0.2                 |                    | 0.3                    |                       |
| ENSG00000202364 | SNORD3A       | -0.04               |                    | -0.02               |                    | 0.2                 |                    | 0.0                 |                    | 0.2                    |                       |
| ENSG00000230225 | RP11-39K24.15 | -0.05               |                    | 0.00                |                    | 0.2                 |                    | 0.0                 |                    | 0.2                    |                       |

**Table A132:** Canonical loadings and explained variance (RNA-Seq, Monocytes, Day 1, Gene variables). Gene variables with at least 25% of explained variance for the first two canonical variates are listed. GX: canonical loadings for canonical variate X, VX: % explained variance for canonical variate X, V1+V2: total % explained variance for both canonical variates. Values for CCA results with a poor cross validation score (< 0.70) are left blank. Sorted by maximum explained variance across treatments (V1+V2).

| IMO Vari-<br>able | IMO Variable Name                   | I1<br>(SV-<br>AS03) | I1<br>(SV-<br>PBS) | I2<br>(SV-<br>AS03) | I2<br>(SV-<br>PBS) | V1<br>(SV-<br>AS03) | V1<br>(SV-<br>PBS) | V2<br>(SV-<br>AS03) | V2<br>(SV-<br>PBS) | V1+V2<br>(SV-<br>AS03) | V1+V2<br>(SV-<br>PBS) |
|-------------------|-------------------------------------|---------------------|--------------------|---------------------|--------------------|---------------------|--------------------|---------------------|--------------------|------------------------|-----------------------|
| MIP-1 $\alpha$    | Macrophage inflammatory protein     | -0.96               |                    | -0.13               |                    | 91.3                |                    | 1.6                 |                    | 92.9                   |                       |
| IP-10             | Interferon gamma-induced protein 10 | -0.86               |                    | 0.21                |                    | 74.3                |                    | 4.3                 |                    | 78.6                   |                       |
| Eotaxin-1         | Eotaxin-1                           | 0.63                |                    | 0.15                |                    | 40.2                |                    | 2.3                 |                    | 42.6                   |                       |
| IL-12p70          | Interleukin-12 p70                  | -0.01               |                    | -0.61               |                    | 0.0                 |                    | 37.5                |                    | 37.5                   |                       |
| TNF               | Tumor necrosis factors              | 0.56                |                    | 0.25                |                    | 31.3                |                    | 6.1                 |                    | 37.4                   |                       |

| IMO Variable  | IMO Variable Name                  | I1<br>(SV-<br>AS03) | I1<br>(SV-<br>PBS) | I2<br>(SV-<br>AS03) | I2<br>(SV-<br>PBS) | V1<br>(SV-<br>AS03) | V1<br>(SV-<br>PBS) | V2<br>(SV-<br>AS03) | V2<br>(SV-<br>PBS) | V1+V2<br>(SV-<br>AS03) | V1+V2<br>(SV-<br>PBS) |
|---------------|------------------------------------|---------------------|--------------------|---------------------|--------------------|---------------------|--------------------|---------------------|--------------------|------------------------|-----------------------|
| Nt            | Microneutralization inhibition     | 0.26                |                    | 0.53                |                    | 7.0                 |                    | 28.5                |                    | 35.5                   |                       |
| IL-1 $\beta$  | Interleukin-1 beta                 | -0.39               |                    | 0.41                |                    | 15.5                |                    | 16.7                |                    | 32.2                   |                       |
| IL-8          | Interleukin-8                      | 0.18                |                    | 0.45                |                    | 3.1                 |                    | 20.3                |                    | 23.4                   |                       |
| IL-6          | Interleukin-6                      | -0.37               |                    | -0.04               |                    | 14.0                |                    | 0.2                 |                    | 14.2                   |                       |
| IFN- $\gamma$ | Interferon gamma                   | 0.35                |                    | -0.07               |                    | 12.0                |                    | 0.5                 |                    | 12.6                   |                       |
| MCP-1         | Monocyte chemoattractant protein-1 | -0.07               |                    | 0.34                |                    | 0.5                 |                    | 11.7                |                    | 12.2                   |                       |
| RANTES        | Chemokine (C-C motif) ligand 5     | -0.30               |                    | -0.02               |                    | 9.1                 |                    | 0.0                 |                    | 9.2                    |                       |
| IL-10         | Interleukin-10                     | -0.17               |                    | 0.14                |                    | 2.8                 |                    | 2.1                 |                    | 4.9                    |                       |

**Table A133:** Canonical loadings and explained variance (RNA-Seq, Monocytes, Day 1, IMO variables). IMO variables with at least 25% of explained variance for the first two canonical variates are listed. GX: canonical loadings for canonical variate X, VX: % explained variance for canonical variate X, V1+V2: total % explained variance for both canonical variates. Values for CCA results with a poor cross validation score (< 0.70) are left blank. Sorted by maximum explained variance across treatments (V1+V2).

| Gene ID         | Gene Name      | G1<br>(SV-<br>AS03) | G1<br>(SV-<br>PBS) | G2<br>(SV-<br>AS03) | G2<br>(SV-<br>PBS) | V1<br>(SV-<br>AS03) | V1<br>(SV-<br>PBS) | V2<br>(SV-<br>AS03) | V2<br>(SV-<br>PBS) | V1+V2<br>(SV-<br>AS03) | V1+V2<br>(SV-<br>PBS) |
|-----------------|----------------|---------------------|--------------------|---------------------|--------------------|---------------------|--------------------|---------------------|--------------------|------------------------|-----------------------|
| ENSG00000006075 | CCL3           | -0.89               | 0.14               | 0.33                | 0.02               | 78.5                | 2.0                | 10.7                | 0.0                | 89.2                   | 2.0                   |
| ENSG00000102760 | C13orf15       | -0.83               | 0.08               | 0.44                | -0.02              | 68.8                | 0.7                | 19.7                | 0.0                | 88.5                   | 0.7                   |
| ENSG00000120738 | EGR1           | -0.91               | -0.14              | 0.22                | 0.02               | 82.8                | 2.0                | 4.7                 | 0.0                | 87.5                   | 2.1                   |
| ENSG00000125740 | FOSB           | -0.87               | 0.18               | 0.21                | -0.22              | 75.9                | 3.1                | 4.5                 | 4.9                | 80.4                   | 8.0                   |
| ENSG00000255398 | GPR109B        | -0.82               | 0.05               | 0.33                | 0.20               | 67.9                | 0.2                | 10.8                | 3.9                | 78.7                   | 4.2                   |
| ENSG00000151704 | KCNJ1          | -0.85               | -0.07              | 0.23                | 0.21               | 72.6                | 0.5                | 5.3                 | 4.6                | 78.0                   | 5.1                   |
| ENSG00000182782 | GPR109A        | -0.80               | 0.19               | 0.37                | 0.19               | 64.1                | 3.8                | 13.8                | 3.7                | 77.9                   | 7.5                   |
| ENSG00000169429 | IL8            | -0.84               | 0.30               | 0.24                | 0.06               | 71.1                | 8.8                | 5.9                 | 0.4                | 77.0                   | 9.2                   |
| ENSG00000090104 | RGS1           | -0.80               | 0.65               | -0.35               | 0.02               | 63.7                | 42.8               | 12.5                | 0.1                | 76.2                   | 42.9                  |
| ENSG00000100385 | IL2RB          | 0.76                | -0.33              | 0.38                | 0.07               | 57.7                | 10.9               | 14.7                | 0.5                | 72.4                   | 11.5                  |
| ENSG00000115085 | ZAP70          | 0.74                | -0.37              | 0.41                | 0.29               | 54.9                | 13.5               | 16.5                | 8.5                | 71.5                   | 22.0                  |
| ENSG00000175592 | FOSL1          | -0.76               | 0.11               | 0.35                | -0.29              | 57.6                | 1.1                | 12.3                | 8.7                | 69.9                   | 9.8                   |
| ENSG00000234961 | RP11-124N14.3  | -0.78               | 0.29               | -0.24               | -0.32              | 61.3                | 8.2                | 5.6                 | 10.0               | 66.9                   | 18.3                  |
| ENSG00000179388 | EGR3           | -0.75               | -0.09              | 0.29                | -0.03              | 55.6                | 0.8                | 8.6                 | 0.1                | 64.2                   | 0.9                   |
| ENSG00000177606 | JUN            | -0.79               | 0.26               | -0.08               | -0.21              | 61.7                | 6.9                | 0.7                 | 4.3                | 62.4                   | 11.2                  |
| ENSG00000108679 | LGALS3BP       | 0.01                | 0.57               | -0.79               | -0.13              | 0.0                 | 32.7               | 62.1                | 1.7                | 62.1                   | 34.4                  |
| ENSG00000180644 | PRF1           | 0.60                | -0.44              | 0.48                | -0.06              | 36.4                | 19.1               | 23.1                | 0.4                | 59.5                   | 19.5                  |
| ENSG00000207166 | SNORA68_207166 | -0.00               | 0.46               | 0.03                | 0.60               | 0.0                 | 21.0               | 0.1                 | 36.5               | 0.1                    | 57.5                  |
| ENSG00000168685 | IL7R           | 0.35                | -0.60              | 0.67                | 0.16               | 11.9                | 35.7               | 45.5                | 2.6                | 57.5                   | 38.3                  |
| ENSG00000125968 | ID1            | -0.73               | 0.48               | -0.17               | -0.18              | 52.7                | 23.0               | 2.9                 | 3.3                | 55.5                   | 26.3                  |
| ENSG00000081059 | TCF7           | 0.43                | -0.60              | 0.59                | -0.11              | 18.4                | 35.7               | 34.6                | 1.1                | 53.0                   | 36.8                  |
| ENSG00000107742 | SPOCK2         | 0.70                | -0.55              | -0.08               | -0.20              | 49.0                | 30.5               | 0.6                 | 4.2                | 49.6                   | 34.7                  |
| ENSG00000129538 | RNASE1         | 0.22                | 0.66               | 0.00                | -0.21              | 5.1                 | 43.9               | 0.0                 | 4.4                | 5.1                    | 48.3                  |
| ENSG00000252678 | RPPH1          | 0.03                | 0.40               | -0.69               | 0.03               | 0.1                 | 16.1               | 47.7                | 0.1                | 47.8                   | 16.2                  |
| ENSG00000184979 | USP18          | -0.25               | 0.51               | -0.65               | -0.06              | 6.0                 | 26.4               | 41.7                | 0.3                | 47.7                   | 26.7                  |
| ENSG00000169902 | TPST1          | 0.22                | 0.00               | -0.64               | -0.12              | 4.9                 | 0.0                | 41.2                | 1.4                | 46.2                   | 1.4                   |
| ENSG00000137959 | IFI44L         | -0.15               | 0.15               | -0.66               | -0.26              | 2.3                 | 2.3                | 43.9                | 6.8                | 46.1                   | 9.2                   |
| ENSG00000088827 | SIGLEC1        | -0.05               | 0.30               | -0.67               | -0.37              | 0.3                 | 8.8                | 45.6                | 13.8               | 45.8                   | 22.6                  |
| ENSG00000019485 | PRDM11         | 0.52                | 0.58               | 0.08                | 0.34               | 26.5                | 33.5               | 0.6                 | 11.5               | 27.1                   | 45.1                  |
| ENSG00000129757 | CDKN1C         | -0.35               | 0.64               | -0.28               | -0.15              | 12.1                | 40.5               | 7.7                 | 2.2                | 19.8                   | 42.7                  |
| ENSG00000115155 | OTOF           | -0.11               | 0.16               | -0.61               | -0.10              | 1.1                 | 2.4                | 37.6                | 1.0                | 38.7                   | 3.4                   |
| ENSG00000173369 | C1QB           | -0.31               | 0.48               | -0.50               | -0.05              | 9.6                 | 22.9               | 25.3                | 0.3                | 34.8                   | 23.2                  |



| Gene ID         | Gene Name     | G1<br>(SV-<br>AS03) | G1<br>(SV-<br>PBS) | G2<br>(SV-<br>AS03) | G2<br>(SV-<br>PBS) | V1<br>(SV-<br>AS03) | V1<br>(SV-<br>PBS) | V2<br>(SV-<br>AS03) | V2<br>(SV-<br>PBS) | V1+V2<br>(SV-<br>AS03) | V1+V2<br>(SV-<br>PBS) |
|-----------------|---------------|---------------------|--------------------|---------------------|--------------------|---------------------|--------------------|---------------------|--------------------|------------------------|-----------------------|
| ENSG00000164082 | GRM2          | -0.57               | 0.44               | -0.04               | 0.29               | 32.0                | 19.5               | 0.2                 | 8.3                | 32.1                   | 27.8                  |
| ENSG00000173372 | C1QA          | -0.12               | 0.56               | -0.44               | -0.08              | 1.5                 | 31.5               | 19.0                | 0.6                | 20.5                   | 32.1                  |
| ENSG00000188290 | HES4          | -0.40               | 0.49               | -0.40               | 0.03               | 16.3                | 24.0               | 15.7                | 0.1                | 32.0                   | 24.1                  |
| ENSG00000120885 | CLU           | 0.11                | -0.48              | -0.49               | -0.28              | 1.2                 | 23.0               | 23.8                | 7.7                | 25.0                   | 30.7                  |
| ENSG00000211899 | IGHM          | -0.10               | -0.53              | -0.10               | 0.12               | 0.9                 | 28.4               | 0.9                 | 1.6                | 1.9                    | 30.0                  |
| ENSG00000111371 | SLC38A1       | -0.13               | -0.48              | 0.19                | -0.23              | 1.6                 | 22.9               | 3.8                 | 5.5                | 5.4                    | 28.4                  |
| ENSG00000235917 | RP11-39K24.14 | -0.20               | -0.05              | 0.34                | -0.41              | 4.0                 | 0.2                | 11.3                | 17.2               | 15.3                   | 17.4                  |
| ENSG00000238035 | AC138035.1    | 0.21                | 0.16               | -0.17               | -0.31              | 4.4                 | 2.5                | 3.0                 | 9.8                | 7.3                    | 12.2                  |

**Table A134:** Canonical loadings and explained variance (RNA-Seq, Monocytes, Day 3, Gene variables). Gene variables with at least 25% of explained variance for the first two canonical variates are listed. GX: canonical loadings for canonical variate X, VX: % explained variance for canonical variate X, V1+V2: total % explained variance for both canonical variates. Values for CCA results with a poor cross validation score (< 0.70) are left blank. Sorted by maximum explained variance across treatments (V1+V2).

| IMO Vari-<br>able | IMO Variable Name                   | I1<br>(SV-<br>AS03) | I1<br>(SV-<br>PBS) | I2<br>(SV-<br>AS03) | I2<br>(SV-<br>PBS) | V1<br>(SV-<br>AS03) | V1<br>(SV-<br>PBS) | V2<br>(SV-<br>AS03) | V2<br>(SV-<br>PBS) | V1+V2<br>(SV-<br>AS03) | V1+V2<br>(SV-<br>PBS) |
|-------------------|-------------------------------------|---------------------|--------------------|---------------------|--------------------|---------------------|--------------------|---------------------|--------------------|------------------------|-----------------------|
| IFN- $\gamma$     | Interferon gamma                    | -0.42               | 0.09               | 0.68                | -0.98              | 17.4                | 0.8                | 46.4                | 95.4               | 63.7                   | 96.2                  |
| IL-1 $\beta$      | Interleukin-1 beta                  | -0.07               | 0.01               | 0.43                | -0.93              | 0.5                 | 0.0                | 18.9                | 87.2               | 19.3                   | 87.2                  |
| TNF               | Tumor necrosis factors              | -0.85               | 0.11               | 0.07                | -0.92              | 72.6                | 1.3                | 0.5                 | 85.2               | 73.2                   | 86.4                  |
| MIP-1 $\alpha$    | Macrophage inflammatory protein     | -0.43               | 0.89               | 0.52                | -0.13              | 18.5                | 79.5               | 27.3                | 1.7                | 45.8                   | 81.1                  |
| IL-10             | Interleukin-10                      | -0.53               | 0.02               | 0.13                | -0.88              | 27.8                | 0.0                | 1.8                 | 78.0               | 29.6                   | 78.0                  |
| IL-6              | Interleukin-6                       | 0.03                | 0.24               | 0.42                | -0.84              | 0.1                 | 5.7                | 17.8                | 70.4               | 17.9                   | 76.1                  |
| IL-8              | Interleukin-8                       | -0.26               | 0.18               | 0.50                | -0.82              | 6.6                 | 3.3                | 25.2                | 67.6               | 31.8                   | 70.9                  |
| IL-12p70          | Interleukin-12 p70                  | -0.44               | -0.74              | -0.14               | -0.37              | 19.3                | 54.6               | 2.1                 | 13.6               | 21.4                   | 68.3                  |
| IP-10             | Interferon gamma-induced protein 10 | -0.31               | 0.76               | -0.70               | 0.04               | 9.4                 | 58.5               | 49.5                | 0.2                | 58.9                   | 58.6                  |
| Nt                | Microneutralization inhibition      | -0.03               | 0.24               | 0.49                | -0.71              | 0.1                 | 5.7                | 23.8                | 50.1               | 23.8                   | 55.9                  |
| MCP-1             | Monocyte chemoattractant protein-1  | 0.10                | 0.58               | 0.67                | 0.31               | 1.0                 | 34.2               | 45.4                | 9.5                | 46.4                   | 43.7                  |
| RANTES            | Chemokine (C-C motif) ligand 5      | -0.14               | 0.40               | 0.26                | 0.42               | 2.0                 | 16.2               | 6.8                 | 17.7               | 8.8                    | 33.9                  |
| Eotaxin-1         | Eotaxin-1                           | -0.43               | 0.32               | 0.16                | 0.09               | 18.6                | 9.9                | 2.5                 | 0.8                | 21.0                   | 10.8                  |

**Table A135:** Canonical loadings and explained variance (RNA-Seq, Monocytes, Day 3, IMO variables). IMO variables with at least 25% of explained variance for the first two canonical variates are listed. GX: canonical loadings for canonical variate X, VX: % explained variance for canonical variate X, V1+V2: total % explained variance for both canonical variates. Values for CCA results with a poor cross validation score (< 0.70) are left blank. Sorted by maximum explained variance across treatments (V1+V2).

| Gene ID         | Gene Name | G1<br>(SV-<br>AS03) | G1<br>(SV-<br>PBS) | G2<br>(SV-<br>AS03) | G2<br>(SV-<br>PBS) | V1<br>(SV-<br>AS03) | V1<br>(SV-<br>PBS) | V2<br>(SV-<br>AS03) | V2<br>(SV-<br>PBS) | V1+V2<br>(SV-<br>AS03) | V1+V2<br>(SV-<br>PBS) |
|-----------------|-----------|---------------------|--------------------|---------------------|--------------------|---------------------|--------------------|---------------------|--------------------|------------------------|-----------------------|
| ENSG00000115085 | ZAP70     | -0.27               | 0.88               | -0.17               | 0.38               | 7.3                 | 77.0               | 2.9                 | 14.4               | 10.2                   | 91.3                  |
| ENSG00000168685 | IL7R      | 0.23                | 0.91               | 0.02                | -0.29              | 5.1                 | 82.5               | 0.0                 | 8.5                | 5.1                    | 91.0                  |
| ENSG00000081059 | TCF7      | 0.12                | 0.95               | 0.01                | -0.04              | 1.4                 | 90.5               | 0.0                 | 0.2                | 1.4                    | 90.7                  |
| ENSG00000120738 | EGR1      | 0.83                | -0.02              | -0.46               | -0.93              | 68.9                | 0.0                | 21.3                | 85.6               | 90.2                   | 85.7                  |
| ENSG00000180644 | PRF1      | 0.53                | 0.50               | 0.48                | 0.71               | 27.9                | 25.2               | 23.4                | 50.3               | 51.2                   | 75.4                  |
| ENSG00000107742 | SPOCK2    | 0.12                | 0.84               | -0.18               | -0.09              | 1.5                 | 71.3               | 3.1                 | 0.9                | 4.5                    | 72.1                  |
| ENSG00000100385 | IL2RB     | 0.16                | 0.50               | -0.09               | 0.61               | 2.4                 | 25.2               | 0.8                 | 37.1               | 3.2                    | 62.4                  |
| ENSG00000252678 | RPPH1     | -0.28               | 0.17               | 0.70                | 0.08               | 7.6                 | 2.9                | 48.9                | 0.6                | 56.6                   | 3.5                   |
| ENSG00000213085 | CCDC19    | 0.00                | -0.52              | -0.03               | 0.50               | 0.0                 | 27.3               | 0.1                 | 24.9               | 0.1                    | 52.1                  |

| Gene ID         | Gene Name  | G1<br>(SV-<br>AS03) | G1<br>(SV-<br>PBS) | G2<br>(SV-<br>AS03) | G2<br>(SV-<br>PBS) | V1<br>(SV-<br>AS03) | V1<br>(SV-<br>PBS) | V2<br>(SV-<br>AS03) | V2<br>(SV-<br>PBS) | V1+V2<br>(SV-<br>AS03) | V1+V2<br>(SV-<br>PBS) |
|-----------------|------------|---------------------|--------------------|---------------------|--------------------|---------------------|--------------------|---------------------|--------------------|------------------------|-----------------------|
| ENSG00000090920 | FCGBP      | -0.45               | 0.16               | -0.38               | -0.67              | 20.5                | 2.5                | 14.7                | 44.8               | 35.2                   | 47.2                  |
| ENSG00000244642 | AP005717.1 | -0.20               | 0.26               | -0.62               | 0.56               | 3.9                 | 7.0                | 38.5                | 30.9               | 42.4                   | 37.9                  |
| ENSG00000110848 | CD69       | 0.15                | 0.58               | 0.41                | -0.30              | 2.3                 | 33.5               | 17.2                | 8.8                | 19.5                   | 42.3                  |
| ENSG00000125968 | ID1        | -0.16               | 0.13               | 0.52                | -0.58              | 2.6                 | 1.7                | 26.6                | 33.1               | 29.1                   | 34.9                  |
| ENSG00000211899 | IGHM       | 0.21                | -0.00              | 0.51                | 0.38               | 4.4                 | 0.0                | 25.9                | 14.4               | 30.2                   | 14.4                  |
| ENSG00000225774 | SIRPAP1    | -0.02               | 0.49               | -0.16               | -0.20              | 0.0                 | 24.4               | 2.6                 | 4.1                | 2.6                    | 28.6                  |
| ENSG00000177606 | JUN        | 0.46                | 0.28               | 0.20                | 0.04               | 20.8                | 7.6                | 4.2                 | 0.2                | 25.0                   | 7.8                   |
| ENSG00000134028 | ADAMDEC1   | -0.18               | -0.11              | 0.44                | -0.03              | 3.1                 | 1.2                | 19.4                | 0.1                | 22.5                   | 1.4                   |
| ENSG00000255221 | CARD17     | -0.13               | -0.07              | -0.27               | 0.44               | 1.8                 | 0.4                | 7.3                 | 19.8               | 9.1                    | 20.2                  |
| ENSG00000135476 | ESPL1      | -0.44               | -0.03              | -0.00               | -0.02              | 19.1                | 0.1                | 0.0                 | 0.1                | 19.1                   | 0.1                   |
| ENSG00000254521 | SIGLEC12   | -0.27               | -0.33              | -0.16               | -0.10              | 7.5                 | 11.0               | 2.7                 | 1.0                | 10.2                   | 11.9                  |

**Table A136:** Canonical loadings and explained variance (RNA-Seq, Monocytes, Day 28, Gene variables). Gene variables with at least 25% of explained variance for the first two canonical variates are listed. GX: canonical loadings for canonical variate X, VX: % explained variance for canonical variate X, V1+V2: total % explained variance for both canonical variates. Values for CCA results with a poor cross validation score (< 0.70) are left blank. Sorted by maximum explained variance across treatments (V1+V2).

| IMO Vari-<br>able | IMO Variable Name                   | I1<br>(SV-<br>AS03) | I1<br>(SV-<br>PBS) | I2<br>(SV-<br>AS03) | I2<br>(SV-<br>PBS) | V1<br>(SV-<br>AS03) | V1<br>(SV-<br>PBS) | V2<br>(SV-<br>AS03) | V2<br>(SV-<br>PBS) | V1+V2<br>(SV-<br>AS03) | V1+V2<br>(SV-<br>PBS) |
|-------------------|-------------------------------------|---------------------|--------------------|---------------------|--------------------|---------------------|--------------------|---------------------|--------------------|------------------------|-----------------------|
| IL-12p70          | Interleukin-12 p70                  | 0.97                | -0.06              | 0.14                | -0.28              | 93.8                | 0.3                | 2.0                 | 7.9                | 95.8                   | 8.2                   |
| IL-6              | Interleukin-6                       | 0.81                | 0.50               | -0.48               | -0.11              | 65.4                | 25.4               | 23.0                | 1.2                | 88.4                   | 26.6                  |
| IP-10             | Interferon gamma-induced protein 10 | -0.50               | 0.28               | 0.77                | -0.22              | 24.6                | 7.6                | 59.0                | 5.0                | 83.6                   | 12.5                  |
| IL-10             | Interleukin-10                      | 0.40                | 0.65               | 0.80                | 0.24               | 16.0                | 42.1               | 63.7                | 5.6                | 79.8                   | 47.7                  |
| Nt                | Microneutralization inhibition      | -0.56               | -0.38              | 0.58                | 0.08               | 31.0                | 14.4               | 33.9                | 0.6                | 64.9                   | 15.1                  |
| HAI               | Hemagglutination inhibition         | -0.48               | -0.17              | 0.59                | 0.13               | 22.7                | 2.9                | 34.2                | 1.7                | 57.0                   | 4.6                   |
| Eotaxin-1         | Eotaxin-1                           | 0.40                | -0.07              | 0.62                | 0.55               | 16.1                | 0.4                | 38.3                | 29.8               | 54.4                   | 30.3                  |
| IL-8              | Interleukin-8                       | 0.54                | 0.14               | 0.48                | 0.25               | 29.3                | 2.0                | 23.1                | 6.4                | 52.5                   | 8.4                   |
| IL-1 $\beta$      | Interleukin-1 beta                  | 0.35                | 0.14               | 0.60                | -0.32              | 12.2                | 1.8                | 35.5                | 10.4               | 47.8                   | 12.2                  |
| RANTES            | Chemokine (C-C motif) ligand 5      | 0.40                | -0.07              | 0.53                | -0.52              | 16.2                | 0.5                | 28.0                | 27.4               | 44.1                   | 27.9                  |
| TNF               | Tumor necrosis factors              | 0.53                | -0.43              | 0.39                | 0.16               | 28.5                | 18.4               | 15.2                | 2.6                | 43.7                   | 21.0                  |
| MCP-1             | Monocyte chemoattractant protein-1  | 0.60                | 0.27               | 0.02                | 0.14               | 36.6                | 7.3                | 0.0                 | 2.0                | 36.6                   | 9.3                   |
| IFN- $\gamma$     | Interferon gamma                    | -0.19               | 0.04               | 0.27                | -0.08              | 3.5                 | 0.1                | 7.6                 | 0.7                | 11.1                   | 0.9                   |
| MIP-1 $\alpha$    | Macrophage inflammatory protein     | -0.06               | 0.16               | -0.10               | 0.01               | 0.3                 | 2.4                | 1.1                 | 0.0                | 1.4                    | 2.4                   |

**Table A137:** Canonical loadings and explained variance (RNA-Seq, Monocytes, Day 28, IMO variables). IMO variables with at least 25% of explained variance for the first two canonical variates are listed. GX: canonical loadings for canonical variate X, VX: % explained variance for canonical variate X, V1+V2: total % explained variance for both canonical variates. Values for CCA results with a poor cross validation score (< 0.70) are left blank. Sorted by maximum explained variance across treatments (V1+V2).

| Gene ID         | Gene Name | G1<br>(SV-<br>AS03) | G1<br>(SV-<br>PBS) | G2<br>(SV-<br>AS03) | G2<br>(SV-<br>PBS) | V1<br>(SV-<br>AS03) | V1<br>(SV-<br>PBS) | V2<br>(SV-<br>AS03) | V2<br>(SV-<br>PBS) | V1+V2<br>(SV-<br>AS03) | V1+V2<br>(SV-<br>PBS) |
|-----------------|-----------|---------------------|--------------------|---------------------|--------------------|---------------------|--------------------|---------------------|--------------------|------------------------|-----------------------|
| ENSG00000101347 | SAMHD1    | -0.99               | -0.38              | 0.10                | 0.06               | 98.5                | 14.8               | 1.0                 | 0.3                | 99.5                   | 15.1                  |
| ENSG00000119917 | IFIT3     | -0.98               | -0.40              | 0.20                | 0.12               | 95.3                | 16.0               | 4.0                 | 1.4                | 99.3                   | 17.4                  |
| ENSG00000149131 | SERPING1  | -0.99               | 0.15               | -0.10               | -0.03              | 97.8                | 2.2                | 1.1                 | 0.1                | 98.9                   | 2.3                   |
| ENSG00000214872 | SMTNL1    | -0.99               | -0.39              | -0.02               | 0.14               | 98.8                | 15.0               | 0.1                 | 2.0                | 98.8                   | 16.9                  |
| ENSG00000107201 | DDX58     | -0.99               | -0.24              | 0.02                | 0.05               | 98.7                | 6.0                | 0.1                 | 0.3                | 98.8                   | 6.3                   |

| Gene ID         | Gene Name    | G1<br>(SV-<br>AS03) | G1<br>(SV-<br>PBS) | G2<br>(SV-<br>AS03) | G2<br>(SV-<br>PBS) | V1<br>(SV-<br>AS03) | V1<br>(SV-<br>PBS) | V2<br>(SV-<br>AS03) | V2<br>(SV-<br>PBS) | V1+V2<br>(SV-<br>AS03) | V1+V2<br>(SV-<br>PBS) |
|-----------------|--------------|---------------------|--------------------|---------------------|--------------------|---------------------|--------------------|---------------------|--------------------|------------------------|-----------------------|
| ENSG00000183347 | GBP6         | -0.99               | 0.32               | 0.09                | 0.16               | 97.8                | 10.2               | 0.8                 | 2.6                | 98.6                   | 12.9                  |
| ENSG00000068079 | IFI35        | -0.97               | -0.13              | 0.18                | -0.00              | 94.9                | 1.6                | 3.4                 | 0.0                | 98.3                   | 1.6                   |
| ENSG00000144848 | ATG3         | -0.91               | -0.05              | 0.40                | 0.44               | 82.4                | 0.2                | 15.9                | 19.1               | 98.3                   | 19.4                  |
| ENSG00000115267 | IFIH1        | -0.99               | -0.31              | 0.10                | 0.20               | 97.2                | 9.4                | 1.1                 | 4.1                | 98.2                   | 13.5                  |
| ENSG00000132530 | XAF1         | -0.99               | -0.34              | 0.08                | 0.16               | 97.4                | 11.9               | 0.7                 | 2.6                | 98.1                   | 14.5                  |
| ENSG00000025708 | TYMP         | -0.99               | 0.34               | 0.04                | 0.09               | 98.0                | 11.7               | 0.1                 | 0.8                | 98.1                   | 12.5                  |
| ENSG00000152766 | ANKRD22      | -0.96               | 0.21               | 0.22                | 0.17               | 92.8                | 4.5                | 4.8                 | 3.0                | 97.6                   | 7.5                   |
| ENSG00000225492 | GBP1P1       | -0.98               | 0.23               | 0.15                | 0.16               | 95.4                | 5.3                | 2.2                 | 2.4                | 97.5                   | 7.8                   |
| ENSG00000154451 | GBP5         | -0.98               | -0.39              | 0.10                | 0.14               | 96.5                | 15.2               | 1.0                 | 2.0                | 97.5                   | 17.2                  |
| ENSG00000136147 | PHF11        | -0.96               | -0.34              | 0.23                | 0.37               | 91.9                | 11.4               | 5.5                 | 13.8               | 97.4                   | 25.2                  |
| ENSG00000156587 | UBE2L6       | -0.99               | -0.31              | -0.01               | -0.07              | 97.3                | 9.4                | 0.0                 | 0.5                | 97.3                   | 9.9                   |
| ENSG00000138646 | HERC5        | -0.98               | -0.42              | 0.14                | 0.07               | 95.4                | 17.7               | 1.9                 | 0.5                | 97.3                   | 18.2                  |
| ENSG00000157601 | MX1          | -0.98               | -0.34              | 0.12                | 0.10               | 95.5                | 11.3               | 1.5                 | 1.0                | 97.0                   | 12.3                  |
| ENSG00000225886 | RP11-288L9.4 | -0.95               | -0.31              | 0.26                | -0.37              | 90.4                | 9.4                | 6.6                 | 14.1               | 97.0                   | 23.5                  |
| ENSG00000112343 | TRIM38       | -0.98               | 0.16               | 0.06                | 0.09               | 96.6                | 2.6                | 0.3                 | 0.8                | 97.0                   | 3.5                   |
| ENSG00000119922 | IFIT2        | -0.95               | -0.55              | 0.26                | 0.11               | 90.3                | 30.4               | 6.6                 | 1.2                | 97.0                   | 31.6                  |
| ENSG00000101342 | C20orf118    | -0.97               | 0.10               | 0.14                | -0.03              | 94.9                | 1.0                | 2.1                 | 0.1                | 96.9                   | 1.1                   |
| ENSG00000145246 | ATP10D       | -0.98               | -0.31              | -0.04               | 0.20               | 96.7                | 9.7                | 0.2                 | 3.9                | 96.9                   | 13.6                  |
| ENSG00000134326 | CMPK2        | -0.96               | -0.43              | 0.21                | 0.18               | 92.3                | 18.9               | 4.4                 | 3.1                | 96.8                   | 22.0                  |
| ENSG00000254838 | GVINP1       | -0.98               | -0.57              | -0.01               | -0.01              | 96.7                | 32.8               | 0.0                 | 0.0                | 96.8                   | 32.8                  |
| ENSG00000164308 | ERAP2        | -0.96               | -0.54              | -0.23               | -0.08              | 91.5                | 29.7               | 5.2                 | 0.7                | 96.7                   | 30.4                  |
| ENSG00000128284 | APOL3        | -0.98               | -0.68              | 0.02                | -0.35              | 96.7                | 46.9               | 0.0                 | 12.5               | 96.7                   | 59.4                  |
| ENSG00000124256 | ZBP1         | -0.98               | -0.14              | -0.04               | -0.23              | 96.5                | 2.1                | 0.1                 | 5.4                | 96.7                   | 7.5                   |
| ENSG00000173193 | PARP14       | -0.98               | -0.38              | 0.05                | 0.06               | 96.5                | 14.7               | 0.2                 | 0.3                | 96.7                   | 15.1                  |
| ENSG00000137965 | IFI44        | -0.98               | -0.37              | 0.12                | 0.21               | 95.2                | 14.0               | 1.5                 | 4.5                | 96.7                   | 18.5                  |
| ENSG00000185745 | IFIT1        | -0.98               | -0.48              | 0.01                | 0.10               | 96.4                | 23.5               | 0.0                 | 1.0                | 96.4                   | 24.6                  |
| ENSG00000205413 | SAMD9        | -0.98               | -0.36              | 0.05                | 0.28               | 96.1                | 13.1               | 0.2                 | 7.8                | 96.3                   | 20.9                  |
| ENSG00000079385 | CEACAM1      | -0.98               | -0.40              | 0.04                | 0.13               | 96.1                | 16.1               | 0.2                 | 1.6                | 96.3                   | 17.7                  |
| ENSG00000105967 | TFEC         | -0.97               | -0.20              | -0.14               | -0.07              | 94.2                | 4.2                | 2.0                 | 0.6                | 96.2                   | 4.7                   |
| ENSG00000100342 | APOL1        | -0.97               | -0.35              | 0.13                | -0.22              | 94.5                | 12.0               | 1.6                 | 4.7                | 96.2                   | 16.7                  |
| ENSG00000137959 | IFI44L       | -0.98               | -0.36              | 0.06                | 0.28               | 95.7                | 13.3               | 0.3                 | 8.0                | 96.1                   | 21.3                  |
| ENSG00000141664 | ZCCHC2       | -0.96               | -0.49              | 0.20                | 0.19               | 91.9                | 24.2               | 4.1                 | 3.7                | 96.1                   | 28.0                  |
| ENSG00000162654 | GBP4         | -0.98               | -0.60              | -0.04               | -0.04              | 95.7                | 35.9               | 0.2                 | 0.2                | 95.9                   | 36.0                  |
| ENSG00000178685 | PARP10       | -0.97               | -0.32              | 0.10                | -0.21              | 95.0                | 10.2               | 1.0                 | 4.5                | 95.9                   | 14.7                  |
| ENSG00000185507 | IRF7         | -0.92               | 0.03               | 0.33                | 0.20               | 85.3                | 0.1                | 10.6                | 3.9                | 95.9                   | 4.0                   |
| ENSG00000134809 | TIMM10       | -0.98               | -0.20              | -0.02               | 0.41               | 95.7                | 4.0                | 0.0                 | 17.0               | 95.7                   | 20.9                  |
| ENSG00000114127 | XRN1         | -0.96               | -0.31              | 0.19                | -0.08              | 92.0                | 9.6                | 3.7                 | 0.7                | 95.7                   | 10.3                  |
| ENSG00000155629 | PIK3AP1      | -0.98               | -0.27              | -0.03               | 0.07               | 95.5                | 7.5                | 0.1                 | 0.5                | 95.6                   | 8.0                   |
| ENSG00000162772 | ATF3         | -0.96               | 0.24               | 0.17                | -0.15              | 92.7                | 5.8                | 2.9                 | 2.2                | 95.6                   | 8.0                   |
| ENSG00000117226 | GBP3         | -0.98               | -0.46              | -0.04               | 0.32               | 95.1                | 20.9               | 0.2                 | 10.1               | 95.3                   | 30.9                  |
| ENSG00000075151 | EIF4G3       | -0.97               | -0.52              | 0.07                | 0.25               | 94.7                | 26.7               | 0.5                 | 6.2                | 95.2                   | 32.9                  |
| ENSG00000132256 | TRIM5        | -0.94               | -0.57              | 0.27                | 0.38               | 88.1                | 32.0               | 7.0                 | 14.6               | 95.2                   | 46.5                  |
| ENSG00000112137 | PHACTR1      | 0.97                | -0.21              | -0.07               | 0.31               | 94.7                | 4.6                | 0.5                 | 9.9                | 95.1                   | 14.5                  |
| ENSG00000133321 | RARRES3      | -0.97               | -0.58              | -0.07               | -0.13              | 94.6                | 33.9               | 0.6                 | 1.6                | 95.1                   | 35.5                  |
| ENSG00000196116 | TDRD7        | -0.97               | -0.01              | 0.01                | 0.16               | 95.0                | 0.0                | 0.0                 | 2.5                | 95.0                   | 2.5                   |
| ENSG00000148834 | GSTO1        | -0.97               | 0.20               | 0.02                | -0.29              | 94.9                | 4.1                | 0.0                 | 8.3                | 95.0                   | 12.4                  |
| ENSG00000134321 | RSAD2        | -0.96               | -0.51              | 0.15                | 0.01               | 92.6                | 25.6               | 2.3                 | 0.0                | 95.0                   | 25.7                  |
| ENSG00000075399 | C16orf7      | -0.94               | 0.56               | 0.26                | 0.36               | 88.2                | 31.3               | 6.7                 | 13.0               | 94.9                   | 44.3                  |
| ENSG00000168062 | BATF2        | -0.96               | -0.60              | 0.14                | 0.03               | 92.9                | 36.3               | 1.9                 | 0.1                | 94.9                   | 36.4                  |
| ENSG00000010030 | ETV7         | -0.97               | -0.39              | 0.11                | 0.17               | 93.6                | 15.1               | 1.3                 | 2.8                | 94.9                   | 17.9                  |
| ENSG00000140464 | PML          | -0.93               | -0.28              | 0.27                | -0.16              | 87.4                | 8.1                | 7.4                 | 2.7                | 94.8                   | 10.7                  |

| Gene ID         | Gene Name    | G1<br>(SV-<br>AS03) | G1<br>(SV-<br>PBS) | G2<br>(SV-<br>AS03) | G2<br>(SV-<br>PBS) | V1<br>(SV-<br>AS03) | V1<br>(SV-<br>PBS) | V2<br>(SV-<br>AS03) | V2<br>(SV-<br>PBS) | V1+V2<br>(SV-<br>AS03) | V1+V2<br>(SV-<br>PBS) |
|-----------------|--------------|---------------------|--------------------|---------------------|--------------------|---------------------|--------------------|---------------------|--------------------|------------------------|-----------------------|
| ENSG00000137628 | DDX60        | -0.97               | -0.39              | 0.02                | 0.06               | 94.7                | 15.2               | 0.0                 | 0.4                | 94.7                   | 15.6                  |
| ENSG00000104805 | NUCB1        | -0.96               | 0.09               | 0.18                | -0.24              | 91.4                | 0.8                | 3.3                 | 5.6                | 94.7                   | 6.4                   |
| ENSG00000204264 | PSMB8        | -0.91               | -0.37              | 0.34                | 0.12               | 82.7                | 14.0               | 11.9                | 1.4                | 94.6                   | 15.3                  |
| ENSG00000197536 | C5orf56      | -0.97               | -0.20              | -0.06               | 0.58               | 94.2                | 3.9                | 0.4                 | 33.7               | 94.6                   | 37.6                  |
| ENSG00000130940 | CASZ1        | -0.97               | -0.09              | -0.10               | -0.08              | 93.6                | 0.8                | 0.9                 | 0.7                | 94.6                   | 1.5                   |
| ENSG00000111331 | OAS3         | -0.97               | -0.49              | 0.07                | 0.01               | 94.1                | 23.8               | 0.4                 | 0.0                | 94.5                   | 23.8                  |
| ENSG00000177409 | SAMD9L       | -0.97               | -0.40              | 0.06                | 0.06               | 94.0                | 16.0               | 0.4                 | 0.4                | 94.4                   | 16.4                  |
| ENSG00000136874 | STX17        | -0.96               | -0.33              | 0.12                | 0.03               | 92.9                | 11.0               | 1.5                 | 0.1                | 94.3                   | 11.1                  |
| ENSG00000123610 | TNFAIP6      | -0.97               | -0.05              | 0.10                | -0.12              | 93.3                | 0.2                | 1.0                 | 1.5                | 94.3                   | 1.7                   |
| ENSG00000185885 | IFITM1       | -0.97               | 0.44               | 0.04                | 0.03               | 94.1                | 19.0               | 0.1                 | 0.1                | 94.3                   | 19.1                  |
| ENSG00000108771 | DHX58        | -0.96               | 0.01               | 0.16                | -0.10              | 91.7                | 0.0                | 2.5                 | 1.0                | 94.3                   | 1.0                   |
| ENSG00000111912 | NCOA7        | -0.93               | -0.45              | 0.28                | -0.53              | 86.1                | 20.0               | 8.0                 | 28.1               | 94.2                   | 48.1                  |
| ENSG00000198133 | TMEM229B     | -0.97               | -0.27              | -0.04               | 0.12               | 93.9                | 7.4                | 0.1                 | 1.4                | 94.0                   | 8.9                   |
| ENSG00000079263 | SP140        | -0.96               | -0.59              | -0.10               | -0.06              | 93.1                | 34.5               | 0.9                 | 0.3                | 94.0                   | 34.9                  |
| ENSG00000145685 | LHFPL2       | -0.95               | -0.53              | 0.17                | 0.32               | 90.9                | 27.9               | 3.0                 | 10.1               | 93.9                   | 38.0                  |
| ENSG00000168394 | TAP1         | -0.93               | -0.34              | 0.28                | 0.06               | 86.3                | 11.8               | 7.6                 | 0.4                | 93.9                   | 12.2                  |
| ENSG00000129667 | RHBDF2       | -0.95               | -0.22              | 0.19                | -0.34              | 90.2                | 4.8                | 3.5                 | 11.5               | 93.8                   | 16.3                  |
| ENSG00000174944 | P2RY14       | -0.97               | -0.36              | 0.03                | -0.07              | 93.5                | 12.9               | 0.1                 | 0.5                | 93.6                   | 13.5                  |
| ENSG00000136770 | DNAJC1       | -0.97               | -0.49              | 0.02                | 0.24               | 93.5                | 23.9               | 0.0                 | 6.0                | 93.6                   | 29.9                  |
| ENSG00000132274 | TRIM22       | -0.95               | -0.09              | 0.17                | 0.20               | 90.7                | 0.7                | 2.9                 | 3.9                | 93.6                   | 4.7                   |
| ENSG00000177989 | ODF3B        | -0.97               | 0.51               | 0.02                | -0.03              | 93.4                | 25.5               | 0.0                 | 0.1                | 93.5                   | 25.6                  |
| ENSG00000074660 | SCARF1       | -0.94               | -0.06              | 0.21                | -0.03              | 89.1                | 0.3                | 4.3                 | 0.1                | 93.4                   | 0.4                   |
| ENSG00000126709 | IFI6         | -0.96               | -0.22              | 0.07                | -0.03              | 92.8                | 5.1                | 0.5                 | 0.1                | 93.3                   | 5.2                   |
| ENSG00000129673 | AANAT        | -0.96               | 0.45               | 0.14                | 0.56               | 91.3                | 20.0               | 2.0                 | 31.1               | 93.3                   | 51.1                  |
| ENSG00000176454 | LPCAT4       | 0.96                | 0.23               | 0.12                | -0.26              | 91.9                | 5.1                | 1.4                 | 6.8                | 93.3                   | 11.9                  |
| ENSG00000131979 | GCH1         | -0.97               | -0.11              | -0.04               | 0.04               | 93.1                | 1.3                | 0.1                 | 0.2                | 93.3                   | 1.5                   |
| ENSG00000133106 | EPST11       | -0.97               | -0.58              | -0.02               | 0.00               | 93.2                | 33.8               | 0.1                 | 0.0                | 93.2                   | 33.8                  |
| ENSG00000155363 | MOV10        | -0.97               | -0.30              | 0.01                | 0.00               | 93.2                | 9.1                | 0.0                 | 0.0                | 93.2                   | 9.1                   |
| ENSG00000138134 | STAMBPL1     | -0.74               | -0.33              | 0.63                | -0.23              | 54.0                | 11.0               | 39.1                | 5.2                | 93.2                   | 16.2                  |
| ENSG00000059378 | PARP12       | -0.95               | -0.40              | 0.17                | 0.06               | 90.0                | 16.0               | 2.7                 | 0.3                | 92.8                   | 16.3                  |
| ENSG00000117228 | GBP1         | -0.96               | -0.48              | 0.09                | 0.23               | 91.9                | 23.3               | 0.9                 | 5.3                | 92.8                   | 28.6                  |
| ENSG00000168016 | TRANK1       | -0.96               | -0.62              | 0.03                | -0.43              | 92.6                | 38.2               | 0.1                 | 18.4               | 92.7                   | 56.5                  |
| ENSG00000070501 | POLB         | -0.96               | -0.47              | 0.09                | 0.22               | 91.9                | 22.3               | 0.7                 | 4.7                | 92.7                   | 27.0                  |
| ENSG00000134243 | SORT1        | -0.83               | -0.37              | 0.49                | -0.08              | 68.5                | 13.9               | 24.1                | 0.6                | 92.7                   | 14.5                  |
| ENSG00000087253 | LPCAT2       | -0.95               | -0.22              | 0.14                | 0.12               | 90.7                | 5.0                | 1.9                 | 1.4                | 92.7                   | 6.3                   |
| ENSG00000105402 | NAPA         | -0.90               | -0.39              | 0.34                | -0.10              | 81.1                | 14.9               | 11.5                | 0.9                | 92.6                   | 15.8                  |
| ENSG00000130589 | RP4-697K14.7 | -0.92               | -0.03              | 0.28                | -0.07              | 84.7                | 0.1                | 7.8                 | 0.4                | 92.5                   | 0.6                   |
| ENSG00000013374 | NUB1         | -0.96               | -0.60              | 0.07                | -0.05              | 91.8                | 36.3               | 0.6                 | 0.2                | 92.4                   | 36.6                  |
| ENSG00000111335 | OAS2         | -0.95               | -0.26              | 0.12                | 0.37               | 90.8                | 7.0                | 1.6                 | 13.5               | 92.3                   | 20.4                  |
| ENSG00000108292 | MLLT6        | -0.91               | 0.04               | 0.32                | -0.40              | 82.0                | 0.2                | 10.3                | 16.0               | 92.3                   | 16.2                  |
| ENSG00000239713 | APOBEC3G     | -0.96               | -0.51              | 0.06                | 0.04               | 91.9                | 25.9               | 0.4                 | 0.1                | 92.3                   | 26.1                  |
| ENSG00000078081 | LAMP3        | -0.96               | -0.03              | 0.04                | 0.03               | 92.0                | 0.1                | 0.2                 | 0.1                | 92.2                   | 0.1                   |
| ENSG00000128335 | APOL2        | -0.95               | -0.30              | 0.10                | 0.05               | 91.2                | 9.3                | 0.9                 | 0.3                | 92.1                   | 9.6                   |
| ENSG00000068784 | SRBD1        | -0.94               | -0.64              | -0.21               | -0.21              | 87.5                | 40.7               | 4.6                 | 4.5                | 92.1                   | 45.2                  |
| ENSG00000186470 | BTN3A2       | -0.96               | -0.61              | -0.03               | 0.00               | 91.9                | 37.8               | 0.1                 | 0.0                | 92.0                   | 37.8                  |
| ENSG00000240065 | PSMB9        | -0.95               | -0.15              | 0.16                | -0.10              | 89.4                | 2.2                | 2.6                 | 1.1                | 92.0                   | 3.3                   |
| ENSG00000107957 | SH3PXD2A     | -0.96               | -0.58              | 0.06                | -0.12              | 91.6                | 33.6               | 0.4                 | 1.5                | 92.0                   | 35.1                  |
| ENSG00000089127 | OAS1         | -0.96               | -0.48              | 0.05                | 0.23               | 91.7                | 22.6               | 0.2                 | 5.4                | 92.0                   | 28.0                  |
| ENSG00000106683 | LIMK1        | -0.95               | -0.59              | 0.12                | 0.09               | 90.5                | 34.9               | 1.4                 | 0.8                | 91.9                   | 35.7                  |
| ENSG00000225131 | PSME2P2      | -0.95               | -0.31              | -0.09               | 0.21               | 90.9                | 9.5                | 0.9                 | 4.2                | 91.8                   | 13.8                  |
| ENSG00000132109 | TRIM21       | -0.95               | -0.14              | 0.12                | 0.27               | 90.2                | 1.9                | 1.3                 | 7.1                | 91.5                   | 9.0                   |

| Gene ID         | Gene Name  | G1<br>(SV-<br>AS03) | G1<br>(SV-<br>PBS) | G2<br>(SV-<br>AS03) | G2<br>(SV-<br>PBS) | V1<br>(SV-<br>AS03) | V1<br>(SV-<br>PBS) | V2<br>(SV-<br>AS03) | V2<br>(SV-<br>PBS) | V1+V2<br>(SV-<br>AS03) | V1+V2<br>(SV-<br>PBS) |
|-----------------|------------|---------------------|--------------------|---------------------|--------------------|---------------------|--------------------|---------------------|--------------------|------------------------|-----------------------|
| ENSG00000145365 | TIFA       | -0.90               | -0.22              | 0.32                | 0.03               | 81.1                | 4.9                | 10.3                | 0.1                | 91.4                   | 5.0                   |
| ENSG00000137200 | FTSJD2     | -0.93               | -0.39              | 0.20                | -0.20              | 87.3                | 14.8               | 4.1                 | 3.9                | 91.4                   | 18.7                  |
| ENSG00000184898 | RBM43      | -0.92               | -0.54              | 0.25                | 0.21               | 84.9                | 29.4               | 6.5                 | 4.5                | 91.4                   | 33.9                  |
| ENSG00000183421 | RIPK4      | 0.91                | 0.53               | -0.30               | 0.10               | 82.3                | 28.0               | 9.0                 | 1.1                | 91.3                   | 29.1                  |
| ENSG00000170581 | STAT2      | -0.94               | -0.32              | 0.14                | 0.20               | 89.1                | 10.4               | 1.9                 | 4.0                | 91.0                   | 14.4                  |
| ENSG00000119397 | CEP110     | -0.95               | -0.35              | -0.05               | 0.14               | 90.7                | 11.9               | 0.3                 | 1.9                | 90.9                   | 13.8                  |
| ENSG00000008283 | CYB561     | -0.95               | -0.44              | 0.11                | -0.11              | 89.7                | 19.2               | 1.1                 | 1.3                | 90.8                   | 20.4                  |
| ENSG00000203666 | EFCAB2     | -0.95               | 0.74               | 0.05                | 0.25               | 90.5                | 55.0               | 0.2                 | 6.1                | 90.8                   | 61.1                  |
| ENSG00000144893 | MED12L     | -0.90               | -0.06              | 0.31                | -0.31              | 80.8                | 0.4                | 9.8                 | 9.7                | 90.6                   | 10.1                  |
| ENSG00000225342 | AC079630.4 | -0.95               | -0.68              | 0.02                | 0.27               | 90.6                | 45.6               | 0.0                 | 7.3                | 90.6                   | 52.9                  |
| ENSG00000130303 | BST2       | -0.94               | -0.05              | 0.12                | 0.14               | 89.1                | 0.2                | 1.5                 | 1.9                | 90.6                   | 2.1                   |
| ENSG00000038274 | MAT2B      | -0.94               | -0.51              | 0.16                | 0.06               | 88.2                | 25.7               | 2.4                 | 0.4                | 90.6                   | 26.1                  |
| ENSG00000174749 | C4orf32    | -0.88               | -0.33              | 0.35                | -0.00              | 78.1                | 11.0               | 12.5                | 0.0                | 90.6                   | 11.0                  |
| ENSG00000075303 | SLC25A40   | 0.91                | -0.65              | 0.28                | 0.12               | 82.4                | 42.0               | 8.1                 | 1.4                | 90.5                   | 43.3                  |
| ENSG00000023171 | GRAMD1B    | -0.95               | -0.59              | -0.00               | -0.30              | 90.5                | 34.4               | 0.0                 | 9.0                | 90.5                   | 43.4                  |
| ENSG00000158411 | MITD1      | -0.91               | 0.07               | 0.28                | 0.35               | 82.5                | 0.6                | 8.0                 | 12.5               | 90.5                   | 13.1                  |
| ENSG00000122729 | ACO1       | -0.95               | -0.03              | -0.01               | 0.15               | 90.3                | 0.1                | 0.0                 | 2.3                | 90.4                   | 2.4                   |
| ENSG00000139597 | N4BP2L1    | -0.94               | -0.38              | 0.16                | -0.00              | 87.7                | 14.6               | 2.7                 | 0.0                | 90.3                   | 14.6                  |
| ENSG00000204267 | TAP2       | -0.95               | -0.54              | 0.05                | 0.11               | 90.0                | 29.2               | 0.3                 | 1.3                | 90.2                   | 30.5                  |
| ENSG00000111860 | C6orf204   | 0.94                | -0.53              | 0.13                | -0.33              | 88.6                | 27.7               | 1.6                 | 11.0               | 90.2                   | 38.7                  |
| ENSG00000152778 | IFIT5      | -0.94               | -0.41              | 0.14                | 0.28               | 88.2                | 17.0               | 2.0                 | 8.0                | 90.2                   | 25.0                  |
| ENSG00000173821 | RNF213     | -0.95               | -0.26              | -0.02               | 0.12               | 90.1                | 6.5                | 0.0                 | 1.5                | 90.2                   | 8.0                   |
| ENSG00000135900 | MRPL44     | -0.94               | -0.46              | 0.09                | 0.13               | 89.1                | 21.2               | 0.8                 | 1.6                | 89.9                   | 22.7                  |
| ENSG00000216490 | IFI30      | -0.94               | 0.05               | 0.14                | -0.16              | 87.7                | 0.3                | 2.1                 | 2.5                | 89.8                   | 2.8                   |
| ENSG00000164715 | LMTK2      | -0.88               | -0.23              | 0.36                | -0.18              | 76.8                | 5.2                | 13.0                | 3.1                | 89.8                   | 8.2                   |
| ENSG00000118162 | KPTN       | -0.90               | 0.12               | 0.31                | 0.02               | 80.1                | 1.4                | 9.6                 | 0.0                | 89.7                   | 1.4                   |
| ENSG00000157693 | C9orf91    | -0.95               | -0.53              | 0.00                | -0.15              | 89.6                | 27.7               | 0.0                 | 2.3                | 89.6                   | 30.0                  |
| ENSG00000228318 | AP001610.5 | -0.94               | 0.30               | 0.10                | -0.07              | 88.6                | 9.2                | 0.9                 | 0.6                | 89.5                   | 9.8                   |
| ENSG00000168899 | VAMP5      | -0.95               | -0.22              | -0.01               | -0.18              | 89.5                | 5.0                | 0.0                 | 3.4                | 89.5                   | 8.4                   |
| ENSG00000204516 | MICB       | -0.94               | -0.55              | 0.06                | 0.08               | 89.0                | 29.8               | 0.4                 | 0.6                | 89.4                   | 30.4                  |
| ENSG00000092010 | PSME1      | -0.94               | -0.56              | -0.10               | -0.06              | 88.3                | 31.5               | 1.1                 | 0.4                | 89.3                   | 31.9                  |
| ENSG00000135114 | OASL       | -0.93               | -0.40              | 0.15                | 0.09               | 87.0                | 15.6               | 2.3                 | 0.9                | 89.3                   | 16.5                  |
| ENSG00000110492 | MDK        | -0.89               | -0.41              | -0.32               | 0.48               | 79.3                | 17.1               | 9.9                 | 22.9               | 89.3                   | 40.0                  |
| ENSG00000211899 | IGHM       | -0.57               | 0.01               | -0.75               | -0.30              | 33.0                | 0.0                | 56.3                | 9.2                | 89.3                   | 9.2                   |
| ENSG00000125826 | RBCK1      | -0.94               | -0.04              | 0.11                | -0.12              | 88.0                | 0.2                | 1.2                 | 1.3                | 89.2                   | 1.5                   |
| ENSG00000130489 | SCO2       | -0.94               | 0.01               | -0.07               | 0.32               | 88.7                | 0.0                | 0.5                 | 10.3               | 89.2                   | 10.3                  |
| ENSG00000085449 | WDFY1      | -0.94               | -0.57              | -0.04               | -0.28              | 89.0                | 32.8               | 0.2                 | 8.0                | 89.1                   | 40.9                  |
| ENSG00000255848 | AC007326.1 | -0.94               | 0.00               | 0.02                | 0.19               | 89.1                | 0.0                | 0.0                 | 3.6                | 89.1                   | 3.6                   |
| ENSG00000155506 | LARP1      | -0.90               | -0.67              | 0.29                | -0.43              | 80.7                | 45.4               | 8.3                 | 18.4               | 89.0                   | 63.8                  |
| ENSG00000187608 | ISG15      | -0.94               | -0.20              | 0.11                | -0.08              | 87.7                | 4.2                | 1.3                 | 0.6                | 89.0                   | 4.8                   |
| ENSG00000126351 | THRA       | 0.94                | -0.27              | -0.11               | -0.31              | 87.8                | 7.2                | 1.2                 | 9.5                | 89.0                   | 16.7                  |
| ENSG00000185404 | SP140L     | -0.94               | -0.51              | 0.06                | 0.09               | 88.6                | 26.0               | 0.3                 | 0.8                | 88.9                   | 26.8                  |
| ENSG00000102445 | C13orf18   | 0.93                | -0.49              | -0.12               | 0.37               | 87.2                | 24.0               | 1.5                 | 14.0               | 88.7                   | 38.0                  |
| ENSG00000182108 | DEXI       | -0.94               | -0.36              | 0.10                | -0.64              | 87.6                | 13.3               | 1.0                 | 41.2               | 88.6                   | 54.4                  |
| ENSG00000026103 | FAS        | -0.90               | -0.27              | 0.26                | 0.09               | 81.7                | 7.1                | 6.9                 | 0.9                | 88.6                   | 8.0                   |
| ENSG00000136732 | GYPC       | -0.92               | 0.07               | 0.20                | -0.07              | 84.5                | 0.4                | 4.1                 | 0.4                | 88.6                   | 0.9                   |
| ENSG00000128394 | APOBEC3F   | -0.93               | -0.44              | -0.11               | 0.25               | 87.4                | 19.3               | 1.2                 | 6.2                | 88.6                   | 25.5                  |
| ENSG00000221963 | APOL6      | -0.94               | -0.33              | 0.03                | 0.23               | 88.4                | 10.8               | 0.1                 | 5.1                | 88.5                   | 15.9                  |
| ENSG00000169871 | TRIM56     | -0.91               | 0.30               | 0.23                | -0.62              | 83.3                | 8.8                | 5.2                 | 39.0               | 88.4                   | 47.8                  |
| ENSG00000012124 | CD22       | -0.73               | 0.13               | -0.59               | -0.61              | 53.2                | 1.8                | 35.2                | 37.2               | 88.4                   | 39.0                  |
| ENSG00000163251 | FZD5       | -0.86               | -0.23              | 0.38                | 0.08               | 73.7                | 5.2                | 14.7                | 0.7                | 88.3                   | 5.9                   |

| Gene ID         | Gene Name    | G1<br>(SV-<br>AS03) | G1<br>(SV-<br>PBS) | G2<br>(SV-<br>AS03) | G2<br>(SV-<br>PBS) | V1<br>(SV-<br>AS03) | V1<br>(SV-<br>PBS) | V2<br>(SV-<br>AS03) | V2<br>(SV-<br>PBS) | V1+V2<br>(SV-<br>AS03) | V1+V2<br>(SV-<br>PBS) |
|-----------------|--------------|---------------------|--------------------|---------------------|--------------------|---------------------|--------------------|---------------------|--------------------|------------------------|-----------------------|
| ENSG00000116663 | FBXO6        | -0.91               | 0.14               | 0.22                | 0.04               | 83.3                | 2.0                | 5.0                 | 0.2                | 88.2                   | 2.2                   |
| ENSG00000170542 | SERPINB9     | -0.94               | 0.72               | 0.04                | -0.01              | 88.0                | 52.0               | 0.2                 | 0.0                | 88.2                   | 52.0                  |
| ENSG00000198948 | MFAP3L       | 0.83                | -0.61              | -0.43               | 0.00               | 69.7                | 36.8               | 18.5                | 0.0                | 88.2                   | 36.8                  |
| ENSG00000107798 | LIPA         | -0.92               | -0.57              | 0.19                | 0.34               | 84.5                | 32.6               | 3.6                 | 11.3               | 88.1                   | 43.9                  |
| ENSG00000247275 | AL160008.1   | -0.94               | -0.47              | 0.04                | 0.06               | 87.8                | 21.7               | 0.2                 | 0.4                | 88.0                   | 22.1                  |
| ENSG00000140105 | WARS         | -0.93               | -0.69              | 0.09                | -0.21              | 87.1                | 47.5               | 0.8                 | 4.6                | 87.9                   | 52.1                  |
| ENSG00000125967 | NECAB3       | 0.86                | -0.35              | 0.38                | 0.19               | 73.1                | 12.5               | 14.7                | 3.7                | 87.8                   | 16.2                  |
| ENSG00000223865 | HLA-DPB1     | -0.51               | -0.10              | -0.79               | 0.05               | 25.5                | 1.0                | 62.3                | 0.2                | 87.8                   | 1.2                   |
| ENSG00000100911 | PSME2        | -0.93               | -0.65              | -0.06               | 0.02               | 87.4                | 41.9               | 0.4                 | 0.0                | 87.8                   | 41.9                  |
| ENSG00000129003 | VPS13C       | -0.91               | -0.55              | -0.20               | -0.11              | 83.7                | 30.6               | 4.0                 | 1.1                | 87.7                   | 31.7                  |
| ENSG00000104312 | RIPK2        | -0.88               | -0.37              | 0.32                | -0.08              | 77.4                | 13.6               | 10.3                | 0.6                | 87.7                   | 14.3                  |
| ENSG00000122643 | NT5C3        | -0.93               | -0.39              | -0.14               | 0.17               | 85.6                | 15.2               | 2.1                 | 2.8                | 87.7                   | 17.9                  |
| ENSG00000135148 | TRAFD1       | -0.85               | -0.63              | 0.38                | 0.12               | 72.9                | 39.4               | 14.8                | 1.3                | 87.7                   | 40.7                  |
| ENSG00000135604 | STX11        | -0.89               | 0.02               | 0.28                | 0.24               | 79.7                | 0.0                | 7.9                 | 6.0                | 87.6                   | 6.0                   |
| ENSG00000102554 | KLF5         | -0.75               | -0.05              | 0.56                | 0.01               | 56.1                | 0.3                | 31.5                | 0.0                | 87.6                   | 0.3                   |
| ENSG00000162645 | GBP2         | -0.92               | -0.30              | 0.19                | 0.33               | 83.8                | 8.9                | 3.7                 | 10.6               | 87.6                   | 19.6                  |
| ENSG00000141574 | SECTM1       | -0.89               | 0.24               | 0.28                | 0.03               | 79.9                | 6.0                | 7.7                 | 0.1                | 87.6                   | 6.1                   |
| ENSG00000100401 | RANGAP1      | -0.88               | -0.13              | 0.32                | -0.01              | 77.4                | 1.7                | 10.1                | 0.0                | 87.5                   | 1.7                   |
| ENSG00000048140 | TSPAN17      | -0.85               | -0.14              | 0.40                | 0.08               | 71.5                | 2.1                | 16.0                | 0.7                | 87.5                   | 2.8                   |
| ENSG00000111801 | BTN3A3       | -0.93               | -0.71              | -0.04               | -0.19              | 87.3                | 49.8               | 0.2                 | 3.8                | 87.5                   | 53.6                  |
| ENSG00000065427 | KARS         | -0.91               | -0.33              | 0.23                | -0.19              | 82.0                | 10.9               | 5.5                 | 3.6                | 87.4                   | 14.6                  |
| ENSG00000108387 | SEPT4        | -0.93               | -0.12              | -0.03               | 0.15               | 87.4                | 1.6                | 0.1                 | 2.4                | 87.4                   | 3.9                   |
| ENSG00000204287 | HLA-DRA      | -0.91               | -0.25              | -0.22               | -0.23              | 82.5                | 6.0                | 4.9                 | 5.2                | 87.4                   | 11.2                  |
| ENSG00000115109 | EPB41L5      | -0.87               | -0.37              | 0.34                | -0.09              | 75.8                | 13.5               | 11.5                | 0.9                | 87.3                   | 14.4                  |
| ENSG00000179344 | HLA-DQB1     | -0.93               | -0.26              | 0.03                | -0.18              | 87.1                | 6.9                | 0.1                 | 3.3                | 87.2                   | 10.1                  |
| ENSG00000166002 | C11orf75     | -0.91               | 0.48               | 0.20                | 0.14               | 83.1                | 23.2               | 4.0                 | 2.0                | 87.1                   | 25.2                  |
| ENSG00000166801 | FAM111A      | -0.92               | -0.70              | -0.14               | 0.08               | 85.0                | 48.5               | 2.1                 | 0.7                | 87.1                   | 49.2                  |
| ENSG00000183688 | FAM101B      | 0.89                | -0.61              | -0.28               | -0.29              | 79.3                | 37.3               | 7.7                 | 8.4                | 87.1                   | 45.7                  |
| ENSG00000119950 | MXI1         | 0.91                | -0.15              | 0.21                | -0.71              | 82.5                | 2.3                | 4.3                 | 51.0               | 86.9                   | 53.3                  |
| ENSG00000153029 | MR1          | -0.92               | -0.15              | 0.11                | 0.17               | 85.5                | 2.4                | 1.2                 | 2.8                | 86.7                   | 5.2                   |
| ENSG00000136514 | RTP4         | -0.92               | -0.41              | -0.15               | -0.41              | 84.2                | 16.7               | 2.4                 | 16.9               | 86.6                   | 33.6                  |
| ENSG00000115956 | PLEK         | -0.88               | 0.10               | 0.30                | 0.11               | 77.3                | 1.1                | 9.3                 | 1.1                | 86.6                   | 2.2                   |
| ENSG00000140030 | GPR65        | -0.93               | -0.14              | 0.08                | 0.02               | 85.9                | 2.1                | 0.7                 | 0.1                | 86.6                   | 2.1                   |
| ENSG00000187741 | FANCA        | -0.89               | 0.01               | 0.26                | -0.42              | 79.7                | 0.0                | 6.9                 | 17.5               | 86.6                   | 17.5                  |
| ENSG00000136573 | BLK          | -0.43               | -0.08              | -0.82               | 0.08               | 18.7                | 0.7                | 67.7                | 0.6                | 86.3                   | 1.3                   |
| ENSG00000179583 | CIITA        | -0.92               | -0.30              | 0.14                | -0.15              | 84.3                | 8.7                | 2.0                 | 2.2                | 86.3                   | 10.9                  |
| ENSG00000168404 | MLKL         | -0.73               | -0.18              | 0.58                | 0.22               | 53.2                | 3.2                | 33.1                | 4.9                | 86.3                   | 8.1                   |
| ENSG00000104518 | GSDMD        | -0.90               | 0.03               | 0.21                | -0.12              | 81.8                | 0.1                | 4.4                 | 1.5                | 86.2                   | 1.6                   |
| ENSG00000160216 | AGPAT3       | -0.92               | -0.56              | -0.11               | 0.01               | 84.9                | 31.1               | 1.3                 | 0.0                | 86.2                   | 31.1                  |
| ENSG00000176438 | C14orf49     | 0.89                | 0.58               | -0.25               | -0.25              | 79.8                | 33.4               | 6.4                 | 6.5                | 86.2                   | 39.8                  |
| ENSG00000155287 | SLC25A28     | -0.92               | -0.22              | 0.12                | 0.10               | 84.6                | 4.8                | 1.6                 | 1.0                | 86.1                   | 5.8                   |
| ENSG00000233552 | AL139035.1   | -0.92               | -0.39              | 0.13                | 0.11               | 84.5                | 15.0               | 1.6                 | 1.1                | 86.1                   | 16.1                  |
| ENSG00000164691 | TAGAP        | -0.77               | -0.30              | 0.52                | 0.39               | 58.8                | 8.9                | 27.2                | 15.0               | 86.0                   | 23.9                  |
| ENSG00000197142 | ACSL5        | -0.93               | -0.19              | 0.01                | -0.40              | 86.0                | 3.6                | 0.0                 | 15.6               | 86.0                   | 19.3                  |
| ENSG00000185989 | RASA3        | 0.89                | -0.32              | 0.25                | -0.64              | 79.5                | 10.0               | 6.4                 | 40.6               | 86.0                   | 50.6                  |
| ENSG00000100292 | HMOX1        | 0.92                | -0.08              | 0.06                | -0.12              | 85.5                | 0.6                | 0.4                 | 1.5                | 85.9                   | 2.1                   |
| ENSG00000067221 | STOML1       | -0.87               | -0.02              | 0.32                | -0.09              | 75.6                | 0.0                | 10.2                | 0.9                | 85.8                   | 0.9                   |
| ENSG00000099860 | GADD45B      | -0.86               | 0.06               | 0.34                | 0.06               | 74.5                | 0.3                | 11.3                | 0.4                | 85.8                   | 0.7                   |
| ENSG00000197555 | SIPA1L1      | -0.93               | -0.28              | 0.05                | -0.41              | 85.6                | 7.9                | 0.2                 | 16.9               | 85.8                   | 24.7                  |
| ENSG00000242574 | HLA-DMB      | -0.92               | -0.34              | -0.05               | 0.23               | 85.3                | 11.6               | 0.3                 | 5.4                | 85.6                   | 17.1                  |
| ENSG00000234518 | RP5-837D10.2 | -0.89               | -0.28              | 0.25                | 0.48               | 79.3                | 7.7                | 6.2                 | 23.5               | 85.5                   | 31.2                  |

| Gene ID         | Gene Name     | G1<br>(SV-<br>AS03) | G1<br>(SV-<br>PBS) | G2<br>(SV-<br>AS03) | G2<br>(SV-<br>PBS) | V1<br>(SV-<br>AS03) | V1<br>(SV-<br>PBS) | V2<br>(SV-<br>AS03) | V2<br>(SV-<br>PBS) | V1+V2<br>(SV-<br>AS03) | V1+V2<br>(SV-<br>PBS) |
|-----------------|---------------|---------------------|--------------------|---------------------|--------------------|---------------------|--------------------|---------------------|--------------------|------------------------|-----------------------|
| ENSG00000203814 | HIST2H2BF     | -0.80               | 0.04               | 0.45                | 0.30               | 64.8                | 0.2                | 20.7                | 8.7                | 85.4                   | 8.9                   |
| ENSG00000034510 | TMSB10        | -0.91               | -0.46              | -0.14               | -0.14              | 83.5                | 21.0               | 1.9                 | 2.1                | 85.4                   | 23.1                  |
| ENSG00000106560 | GIMAP2        | -0.92               | -0.05              | 0.09                | -0.11              | 84.6                | 0.3                | 0.8                 | 1.1                | 85.3                   | 1.4                   |
| ENSG00000106049 | HIBADH        | 0.38                | -0.91              | 0.25                | -0.16              | 14.4                | 82.8               | 6.5                 | 2.4                | 20.9                   | 85.3                  |
| ENSG00000229677 | RP11-383F6.1  | -0.74               | 0.52               | 0.55                | 0.43               | 55.2                | 27.3               | 30.0                | 18.7               | 85.2                   | 46.0                  |
| ENSG00000185022 | MAFF          | -0.67               | 0.05               | 0.64                | -0.07              | 44.5                | 0.3                | 40.6                | 0.5                | 85.1                   | 0.8                   |
| ENSG00000065911 | MTHFD2        | -0.90               | -0.33              | 0.19                | 0.29               | 81.4                | 11.0               | 3.6                 | 8.7                | 85.1                   | 19.6                  |
| ENSG00000163875 | MEAF6         | 0.89                | -0.33              | -0.26               | -0.31              | 78.4                | 10.6               | 6.6                 | 9.4                | 85.1                   | 20.0                  |
| ENSG00000250233 | AC015802.1    | -0.92               | -0.03              | 0.10                | -0.08              | 84.1                | 0.1                | 0.9                 | 0.6                | 85.0                   | 0.7                   |
| ENSG00000124795 | DEK           | -0.87               | -0.11              | 0.31                | 0.36               | 75.2                | 1.1                | 9.8                 | 12.9               | 85.0                   | 14.0                  |
| ENSG00000148110 | HIATL1        | -0.92               | 0.00               | 0.01                | -0.08              | 84.9                | 0.0                | 0.0                 | 0.7                | 84.9                   | 0.7                   |
| ENSG00000247982 | AC016525.1    | -0.56               | 0.38               | -0.73               | -0.07              | 31.8                | 14.3               | 53.1                | 0.5                | 84.9                   | 14.8                  |
| ENSG00000135378 | PRRG4         | -0.92               | -0.50              | 0.04                | 0.54               | 84.6                | 24.9               | 0.2                 | 29.5               | 84.8                   | 54.3                  |
| ENSG00000176871 | WSB2          | -0.92               | -0.25              | 0.09                | -0.18              | 84.1                | 6.0                | 0.7                 | 3.3                | 84.8                   | 9.3                   |
| ENSG00000198087 | CD2AP         | -0.92               | -0.68              | -0.02               | 0.18               | 84.7                | 46.8               | 0.0                 | 3.1                | 84.7                   | 49.8                  |
| ENSG00000110848 | CD69          | -0.84               | -0.55              | 0.38                | 0.12               | 70.3                | 30.5               | 14.4                | 1.4                | 84.6                   | 31.9                  |
| ENSG00000128203 | ASPHD2        | -0.90               | -0.45              | -0.21               | -0.17              | 80.3                | 20.2               | 4.4                 | 2.8                | 84.6                   | 22.9                  |
| ENSG00000177738 | CTD-2201E18.3 | -0.79               | 0.28               | 0.48                | 0.22               | 61.8                | 7.6                | 22.8                | 4.6                | 84.6                   | 12.3                  |
| ENSG00000168906 | MAT2A         | 0.91                | -0.28              | 0.15                | -0.59              | 82.3                | 7.7                | 2.2                 | 35.4               | 84.5                   | 43.1                  |
| ENSG00000155561 | NUP205        | -0.92               | -0.55              | 0.06                | 0.13               | 84.0                | 29.9               | 0.4                 | 1.6                | 84.4                   | 31.5                  |
| ENSG00000035664 | DAPK2         | 0.90                | -0.62              | -0.18               | -0.19              | 81.0                | 38.5               | 3.3                 | 3.8                | 84.3                   | 42.3                  |
| ENSG00000168264 | IRF2BP2       | 0.88                | -0.13              | -0.26               | -0.42              | 77.8                | 1.8                | 6.5                 | 17.7               | 84.3                   | 19.5                  |
| ENSG00000123609 | NMI           | -0.90               | -0.23              | 0.19                | 0.26               | 80.6                | 5.2                | 3.7                 | 6.8                | 84.3                   | 12.0                  |
| ENSG00000172159 | FRMD3         | -0.87               | -0.90              | -0.10               | -0.20              | 76.4                | 80.1               | 1.0                 | 4.1                | 77.3                   | 84.2                  |
| ENSG00000152689 | RASGRP3       | -0.80               | 0.15               | -0.45               | 0.51               | 64.3                | 2.2                | 19.8                | 25.8               | 84.2                   | 28.1                  |
| ENSG00000148175 | STOM          | -0.91               | -0.02              | 0.15                | 0.07               | 81.9                | 0.1                | 2.1                 | 0.5                | 84.0                   | 0.6                   |
| ENSG00000254503 | CTD-2521M24.4 | -0.91               | -0.21              | 0.08                | 0.13               | 83.2                | 4.6                | 0.6                 | 1.6                | 83.9                   | 6.2                   |
| ENSG00000180628 | PCGF5         | -0.91               | -0.57              | -0.11               | 0.06               | 82.7                | 32.4               | 1.1                 | 0.4                | 83.8                   | 32.8                  |
| ENSG00000124875 | CXCL6         | 0.91                | 0.04               | -0.14               | 0.36               | 81.9                | 0.2                | 1.9                 | 12.7               | 83.8                   | 12.9                  |
| ENSG00000198216 | CACNA1E       | -0.91               | 0.48               | -0.12               | -0.14              | 82.2                | 22.9               | 1.5                 | 2.0                | 83.8                   | 24.8                  |
| ENSG00000107960 | OBFC1         | -0.85               | -0.09              | 0.33                | 0.25               | 72.7                | 0.9                | 11.0                | 6.1                | 83.7                   | 6.9                   |
| ENSG00000185338 | SOCS1         | -0.83               | -0.74              | 0.39                | 0.19               | 68.5                | 54.3               | 15.1                | 3.8                | 83.7                   | 58.0                  |
| ENSG00000163840 | DTX3L         | -0.89               | -0.35              | 0.21                | 0.33               | 79.2                | 12.2               | 4.2                 | 10.6               | 83.4                   | 22.7                  |
| ENSG00000233030 | RP11-196G18.3 | -0.91               | 0.09               | 0.04                | 0.24               | 82.9                | 0.9                | 0.2                 | 5.9                | 83.1                   | 6.8                   |
| ENSG00000179833 | SERTAD2       | 0.91                | -0.51              | -0.05               | 0.45               | 82.8                | 26.2               | 0.2                 | 20.7               | 83.0                   | 46.9                  |
| ENSG00000152229 | PSTPIP2       | -0.90               | -0.33              | 0.13                | 0.43               | 81.2                | 10.7               | 1.8                 | 18.2               | 83.0                   | 28.9                  |
| ENSG00000211898 | IGHD          | -0.45               | 0.18               | -0.79               | 0.30               | 20.2                | 3.3                | 62.8                | 8.9                | 82.9                   | 12.1                  |
| ENSG00000055332 | EIF2AK2       | -0.90               | -0.11              | 0.16                | 0.41               | 80.4                | 1.3                | 2.5                 | 16.6               | 82.9                   | 17.9                  |
| ENSG00000168421 | RHOH          | -0.77               | -0.81              | 0.31                | -0.41              | 59.5                | 66.3               | 9.6                 | 16.6               | 69.2                   | 82.9                  |
| ENSG00000106100 | NOD1          | -0.91               | -0.82              | 0.05                | -0.25              | 82.4                | 67.8               | 0.3                 | 6.4                | 82.7                   | 74.2                  |
| ENSG00000196126 | HLA-DRB1      | -0.80               | -0.15              | -0.43               | 0.42               | 64.0                | 2.4                | 18.5                | 17.3               | 82.5                   | 19.7                  |
| ENSG00000253193 | FCGR1C        | -0.88               | 0.15               | 0.21                | 0.16               | 78.1                | 2.1                | 4.3                 | 2.6                | 82.4                   | 4.8                   |
| ENSG00000143390 | RFX5          | -0.90               | -0.16              | -0.12               | -0.32              | 81.0                | 2.5                | 1.4                 | 10.5               | 82.4                   | 13.0                  |
| ENSG00000160932 | LY6E          | -0.89               | -0.19              | 0.18                | 0.22               | 78.9                | 3.4                | 3.4                 | 4.8                | 82.3                   | 8.3                   |
| ENSG00000183784 | C9orf66       | -0.86               | -0.08              | 0.28                | 0.24               | 74.3                | 0.7                | 7.9                 | 5.6                | 82.2                   | 6.3                   |
| ENSG00000090339 | ICAM1         | -0.84               | 0.45               | 0.33                | -0.21              | 71.2                | 20.5               | 10.9                | 4.5                | 82.1                   | 25.1                  |
| ENSG00000132470 | ITGB4         | 0.88                | 0.20               | 0.20                | -0.14              | 78.0                | 3.9                | 4.1                 | 2.0                | 82.1                   | 5.9                   |
| ENSG00000128346 | C22orf23      | -0.87               | -0.36              | 0.24                | -0.41              | 76.1                | 12.7               | 6.0                 | 16.6               | 82.1                   | 29.4                  |
| ENSG00000028116 | VRK2          | -0.90               | -0.29              | 0.07                | -0.69              | 81.6                | 8.6                | 0.5                 | 47.2               | 82.1                   | 55.7                  |
| ENSG00000228203 | AC017076.4    | -0.90               | -0.19              | 0.06                | -0.37              | 81.7                | 3.8                | 0.4                 | 13.6               | 82.1                   | 17.4                  |
| ENSG00000138660 | AP1AR         | -0.80               | -0.34              | 0.42                | 0.05               | 64.3                | 11.7               | 17.7                | 0.3                | 82.0                   | 12.0                  |

| Gene ID         | Gene Name         | G1<br>(SV-<br>AS03) | G1<br>(SV-<br>PBS) | G2<br>(SV-<br>AS03) | G2<br>(SV-<br>PBS) | V1<br>(SV-<br>AS03) | V1<br>(SV-<br>PBS) | V2<br>(SV-<br>AS03) | V2<br>(SV-<br>PBS) | V1+V2<br>(SV-<br>AS03) | V1+V2<br>(SV-<br>PBS) |
|-----------------|-------------------|---------------------|--------------------|---------------------|--------------------|---------------------|--------------------|---------------------|--------------------|------------------------|-----------------------|
| ENSG00000197448 | GSTK1             | -0.86               | 0.58               | 0.28                | -0.01              | 74.2                | 34.1               | 7.8                 | 0.0                | 82.0                   | 34.1                  |
| ENSG00000172493 | AFF1              | -0.87               | -0.05              | 0.23                | 0.33               | 76.4                | 0.2                | 5.5                 | 10.6               | 82.0                   | 10.8                  |
| ENSG00000135362 | PRR5L             | -0.83               | -0.25              | 0.35                | 0.15               | 69.5                | 6.3                | 12.5                | 2.4                | 82.0                   | 8.7                   |
| ENSG00000163644 | PPM1K             | -0.84               | -0.67              | -0.33               | -0.42              | 71.0                | 44.6               | 10.9                | 18.0               | 81.9                   | 62.6                  |
| ENSG00000254470 | RP11-770G2.3      | -0.86               | 0.36               | 0.30                | 0.39               | 73.1                | 12.9               | 8.7                 | 15.4               | 81.8                   | 28.3                  |
| ENSG00000181381 | DDX60L            | -0.90               | 0.07               | 0.03                | 0.32               | 81.7                | 0.5                | 0.1                 | 10.1               | 81.8                   | 10.6                  |
| ENSG00000167208 | SNX20             | -0.88               | -0.24              | 0.21                | 0.25               | 77.2                | 6.0                | 4.6                 | 6.2                | 81.8                   | 12.2                  |
| ENSG00000140968 | IRF8              | -0.68               | 0.06               | -0.59               | -0.35              | 46.6                | 0.3                | 35.1                | 12.2               | 81.6                   | 12.5                  |
| ENSG00000124785 | NRN1              | -0.85               | 0.15               | 0.30                | 0.30               | 72.8                | 2.3                | 8.7                 | 9.3                | 81.6                   | 11.6                  |
| ENSG00000047621 | C12orf4           | -0.75               | -0.25              | 0.51                | 0.06               | 56.0                | 6.3                | 25.6                | 0.3                | 81.5                   | 6.6                   |
| ENSG00000234571 | RP5-998N21.4      | -0.90               | 0.20               | -0.07               | 0.47               | 80.9                | 4.2                | 0.5                 | 22.0               | 81.4                   | 26.2                  |
| ENSG00000075240 | GRAMD4            | 0.89                | -0.74              | 0.17                | -0.25              | 78.5                | 55.4               | 2.9                 | 6.2                | 81.4                   | 61.6                  |
| ENSG00000172183 | ISG20             | -0.90               | -0.28              | 0.08                | -0.16              | 80.7                | 7.7                | 0.7                 | 2.7                | 81.3                   | 10.4                  |
| ENSG00000126246 | IGFLR1            | -0.79               | 0.34               | 0.43                | -0.15              | 62.9                | 11.8               | 18.4                | 2.3                | 81.3                   | 14.1                  |
| ENSG00000136104 | RNASEH2B          | -0.90               | -0.25              | 0.08                | -0.15              | 80.7                | 6.3                | 0.6                 | 2.3                | 81.3                   | 8.6                   |
| ENSG00000100908 | FAM158A           | -0.90               | -0.32              | 0.00                | 0.27               | 81.3                | 10.3               | 0.0                 | 7.5                | 81.3                   | 17.8                  |
| ENSG00000159459 | UBR1              | -0.86               | -0.07              | 0.28                | 0.25               | 73.4                | 0.5                | 7.8                 | 6.4                | 81.2                   | 6.9                   |
| ENSG00000204345 | CD300LD           | -0.71               | -0.36              | 0.56                | -0.68              | 50.1                | 13.3               | 31.0                | 46.8               | 81.1                   | 60.1                  |
| ENSG00000236943 | AL592284.1_236943 | -0.84               | -0.50              | 0.34                | 0.57               | 69.8                | 24.8               | 11.3                | 32.1               | 81.1                   | 56.9                  |
| ENSG00000205730 | ITPRIPL2          | -0.86               | 0.31               | 0.28                | -0.17              | 73.3                | 9.6                | 7.8                 | 2.8                | 81.1                   | 12.4                  |
| ENSG00000121858 | TNFSF10           | -0.85               | -0.24              | 0.29                | 0.23               | 72.7                | 5.8                | 8.4                 | 5.4                | 81.0                   | 11.3                  |
| ENSG00000254667 | AP000783.1        | -0.90               | 0.05               | 0.08                | -0.03              | 80.2                | 0.2                | 0.7                 | 0.1                | 80.9                   | 0.3                   |
| ENSG00000120217 | CD274             | -0.90               | 0.02               | -0.05               | 0.36               | 80.5                | 0.0                | 0.3                 | 12.8               | 80.8                   | 12.8                  |
| ENSG00000235999 | RP11-403I13.8     | -0.90               | -0.17              | 0.05                | 0.26               | 80.5                | 2.8                | 0.2                 | 6.7                | 80.7                   | 9.5                   |
| ENSG00000177119 | ANO6              | -0.88               | -0.06              | -0.16               | 0.11               | 78.0                | 0.3                | 2.7                 | 1.2                | 80.6                   | 1.5                   |
| ENSG00000115392 | FANCL             | -0.87               | 0.02               | 0.22                | 0.13               | 75.6                | 0.0                | 4.8                 | 1.7                | 80.4                   | 1.7                   |
| ENSG00000133574 | GIMAP4            | -0.89               | -0.54              | 0.11                | -0.02              | 79.1                | 29.2               | 1.3                 | 0.0                | 80.4                   | 29.3                  |
| ENSG00000237927 | RP3-393E18.2      | -0.90               | -0.14              | 0.04                | 0.12               | 80.2                | 1.9                | 0.2                 | 1.4                | 80.4                   | 3.2                   |
| ENSG00000211895 | IGHA1             | -0.59               | 0.34               | -0.67               | -0.09              | 35.0                | 11.2               | 45.3                | 0.7                | 80.3                   | 12.0                  |
| ENSG00000196141 | SPATS2L           | -0.88               | -0.11              | 0.16                | -0.30              | 77.8                | 1.3                | 2.5                 | 8.8                | 80.3                   | 10.1                  |
| ENSG00000156738 | MS4A1             | -0.59               | 0.47               | -0.68               | 0.06               | 34.3                | 22.3               | 45.9                | 0.3                | 80.2                   | 22.6                  |
| ENSG00000166750 | SLFN5             | -0.89               | -0.30              | -0.11               | -0.24              | 78.8                | 8.7                | 1.3                 | 5.5                | 80.1                   | 14.3                  |
| ENSG00000104921 | FCER2             | -0.49               | 0.23               | -0.75               | -0.21              | 23.9                | 5.1                | 56.1                | 4.5                | 80.0                   | 9.6                   |
| ENSG00000138496 | PARP9             | -0.89               | -0.07              | 0.02                | 0.41               | 79.9                | 0.4                | 0.0                 | 16.4               | 80.0                   | 16.9                  |
| ENSG00000134070 | IRAK2             | -0.88               | 0.15               | 0.15                | -0.10              | 77.7                | 2.2                | 2.2                 | 1.0                | 79.9                   | 3.2                   |
| ENSG00000162714 | ZNF496            | -0.88               | 0.39               | 0.13                | -0.03              | 78.2                | 14.9               | 1.7                 | 0.1                | 79.9                   | 15.0                  |
| ENSG00000249173 | RP11-701P16.4     | -0.35               | 0.76               | 0.28                | 0.46               | 12.4                | 58.4               | 7.6                 | 21.4               | 19.9                   | 79.8                  |
| ENSG00000135473 | PAN2              | -0.89               | -0.31              | -0.11               | -0.01              | 78.6                | 9.6                | 1.3                 | 0.0                | 79.8                   | 9.6                   |
| ENSG00000152223 | EPG5              | -0.78               | -0.46              | 0.43                | 0.22               | 61.3                | 20.7               | 18.5                | 4.7                | 79.8                   | 25.5                  |
| ENSG00000152818 | UTRN              | -0.86               | -0.43              | -0.26               | -0.04              | 73.1                | 18.4               | 6.6                 | 0.2                | 79.8                   | 18.5                  |
| ENSG00000235953 | AL353805.1        | -0.89               | -0.01              | 0.11                | 0.26               | 78.5                | 0.0                | 1.2                 | 6.6                | 79.8                   | 6.6                   |
| ENSG00000129038 | LOXL1             | -0.67               | 0.57               | 0.59                | 0.09               | 45.1                | 32.6               | 34.6                | 0.8                | 79.7                   | 33.4                  |
| ENSG00000125148 | MT2A              | -0.89               | -0.28              | -0.09               | -0.02              | 78.7                | 7.7                | 0.8                 | 0.0                | 79.5                   | 7.8                   |
| ENSG00000100918 | REC8              | -0.88               | 0.15               | 0.16                | 0.38               | 76.9                | 2.2                | 2.6                 | 14.1               | 79.5                   | 16.3                  |
| ENSG00000184221 | OLIG1             | 0.88                | -0.48              | -0.13               | -0.16              | 77.9                | 23.0               | 1.6                 | 2.4                | 79.4                   | 25.5                  |
| ENSG00000128512 | DOCK4             | -0.89               | -0.01              | -0.01               | -0.31              | 79.4                | 0.0                | 0.0                 | 9.8                | 79.4                   | 9.8                   |
| ENSG00000234515 | PPP1R2P1          | -0.89               | -0.68              | -0.06               | 0.21               | 79.0                | 46.0               | 0.4                 | 4.3                | 79.4                   | 50.3                  |
| ENSG00000167207 | NOD2              | -0.87               | -0.21              | 0.20                | 0.37               | 75.6                | 4.2                | 3.8                 | 13.9               | 79.4                   | 18.1                  |
| ENSG00000254859 | RP11-661A12.5     | -0.89               | 0.32               | 0.04                | -0.31              | 79.1                | 10.0               | 0.2                 | 9.6                | 79.3                   | 19.6                  |
| ENSG00000187091 | PLCD1             | 0.89                | 0.01               | 0.06                | -0.34              | 78.7                | 0.0                | 0.3                 | 11.8               | 79.0                   | 11.8                  |
| ENSG00000119537 | KDSR              | -0.75               | 0.20               | 0.48                | -0.27              | 56.3                | 4.2                | 22.7                | 7.4                | 79.0                   | 11.6                  |



| Gene ID         | Gene Name     | G1<br>(SV-<br>AS03) | G1<br>(SV-<br>PBS) | G2<br>(SV-<br>AS03) | G2<br>(SV-<br>PBS) | V1<br>(SV-<br>AS03) | V1<br>(SV-<br>PBS) | V2<br>(SV-<br>AS03) | V2<br>(SV-<br>PBS) | V1+V2<br>(SV-<br>AS03) | V1+V2<br>(SV-<br>PBS) |
|-----------------|---------------|---------------------|--------------------|---------------------|--------------------|---------------------|--------------------|---------------------|--------------------|------------------------|-----------------------|
| ENSG00000058866 | DGKG          | 0.88                | -0.26              | 0.08                | 0.27               | 78.3                | 6.8                | 0.6                 | 7.0                | 78.9                   | 13.9                  |
| ENSG00000069424 | KCNAB2        | 0.86                | -0.39              | 0.21                | -0.49              | 74.5                | 14.9               | 4.4                 | 24.0               | 78.9                   | 38.9                  |
| ENSG00000179044 | EXOC3L1       | -0.88               | -0.10              | -0.09               | 0.48               | 78.1                | 1.0                | 0.7                 | 23.2               | 78.8                   | 24.2                  |
| ENSG00000064601 | CTSA          | -0.79               | -0.23              | 0.41                | -0.22              | 62.1                | 5.4                | 16.7                | 4.7                | 78.8                   | 10.2                  |
| ENSG00000104164 | PLDN          | -0.86               | -0.23              | 0.21                | 0.23               | 74.2                | 5.2                | 4.5                 | 5.4                | 78.7                   | 10.7                  |
| ENSG00000103642 | LACTB         | -0.74               | -0.02              | 0.49                | 0.19               | 55.0                | 0.1                | 23.6                | 3.5                | 78.6                   | 3.6                   |
| ENSG00000213839 | RP11-3J10.4   | 0.82                | 0.08               | -0.33               | -0.17              | 67.9                | 0.6                | 10.8                | 3.0                | 78.6                   | 3.7                   |
| ENSG00000138642 | HERC6         | -0.89               | -0.07              | 0.00                | -0.12              | 78.6                | 0.5                | 0.0                 | 1.3                | 78.6                   | 1.8                   |
| ENSG00000065613 | SLK           | -0.76               | -0.11              | 0.45                | 0.21               | 58.2                | 1.2                | 20.4                | 4.2                | 78.6                   | 5.4                   |
| ENSG00000107566 | ERLIN1        | -0.44               | 0.18               | 0.77                | -0.08              | 19.2                | 3.1                | 59.3                | 0.7                | 78.5                   | 3.9                   |
| ENSG00000249244 | RP11-548H18.2 | -0.88               | -0.20              | 0.10                | 0.40               | 77.6                | 4.2                | 0.9                 | 15.6               | 78.5                   | 19.8                  |
| ENSG00000205220 | PSMB10        | -0.88               | -0.23              | 0.06                | -0.24              | 78.1                | 5.4                | 0.4                 | 5.8                | 78.5                   | 11.1                  |
| ENSG00000196092 | PAX5          | -0.51               | -0.03              | -0.72               | 0.26               | 26.4                | 0.1                | 52.1                | 6.7                | 78.4                   | 6.8                   |
| ENSG00000136193 | SCRN1         | -0.63               | -0.39              | -0.62               | -0.45              | 40.0                | 14.9               | 38.3                | 20.2               | 78.4                   | 35.1                  |
| ENSG00000232680 | AC002511.3    | -0.89               | 0.65               | -0.01               | 0.05               | 78.3                | 41.9               | 0.0                 | 0.3                | 78.3                   | 42.2                  |
| ENSG00000090554 | FLT3LG        | -0.88               | -0.44              | 0.08                | 0.05               | 77.6                | 19.2               | 0.7                 | 0.2                | 78.3                   | 19.4                  |
| ENSG00000177721 | C5orf39       | -0.85               | -0.65              | 0.25                | -0.17              | 71.8                | 42.0               | 6.5                 | 2.9                | 78.2                   | 45.0                  |
| ENSG00000196123 | KIAA0895L     | -0.88               | 0.23               | -0.10               | 0.02               | 77.1                | 5.4                | 1.1                 | 0.0                | 78.2                   | 5.4                   |
| ENSG00000119655 | NPC2          | -0.88               | -0.60              | -0.07               | -0.02              | 77.7                | 36.1               | 0.5                 | 0.0                | 78.2                   | 36.2                  |
| ENSG00000132780 | NASP          | -0.86               | -0.02              | 0.18                | 0.27               | 74.8                | 0.0                | 3.3                 | 7.2                | 78.1                   | 7.2                   |
| ENSG00000175643 | C16orf75      | -0.84               | 0.25               | 0.27                | 0.48               | 70.6                | 6.1                | 7.4                 | 23.3               | 78.0                   | 29.4                  |
| ENSG00000245602 | AC073548.1    | -0.81               | -0.13              | 0.34                | 0.19               | 66.3                | 1.6                | 11.7                | 3.7                | 78.0                   | 5.3                   |
| ENSG00000143891 | GALM          | -0.88               | -0.63              | -0.00               | 0.19               | 77.9                | 39.1               | 0.0                 | 3.7                | 77.9                   | 42.8                  |
| ENSG00000125347 | IRF1          | -0.77               | -0.05              | 0.43                | 0.37               | 59.5                | 0.3                | 18.3                | 14.1               | 77.8                   | 14.3                  |
| ENSG00000150337 | FCGR1A        | -0.87               | 0.30               | 0.16                | 0.43               | 75.3                | 9.3                | 2.5                 | 18.7               | 77.8                   | 27.9                  |
| ENSG00000162976 | PQLC3         | 0.85                | -0.10              | -0.23               | -0.38              | 72.3                | 1.0                | 5.5                 | 14.5               | 77.8                   | 15.5                  |
| ENSG00000187231 | SESTD1        | -0.88               | -0.12              | -0.11               | 0.28               | 76.6                | 1.5                | 1.1                 | 7.9                | 77.8                   | 9.4                   |
| ENSG00000164134 | NAA15         | -0.81               | 0.02               | 0.34                | 0.26               | 66.1                | 0.0                | 11.5                | 6.7                | 77.6                   | 6.8                   |
| ENSG00000151692 | RNF144A       | -0.87               | -0.60              | 0.12                | 0.27               | 76.2                | 36.0               | 1.4                 | 7.3                | 77.6                   | 43.3                  |
| ENSG00000183018 | SPNS2         | 0.87                | 0.02               | -0.11               | 0.02               | 76.4                | 0.0                | 1.2                 | 0.1                | 77.6                   | 0.1                   |
| ENSG00000103489 | XYLT1         | 0.88                | -0.46              | -0.10               | -0.41              | 76.6                | 21.2               | 0.9                 | 16.6               | 77.5                   | 37.8                  |
| ENSG00000141971 | FAM125A       | -0.83               | -0.45              | 0.28                | 0.40               | 69.5                | 20.6               | 8.0                 | 16.3               | 77.5                   | 37.0                  |
| ENSG00000139832 | RAB20         | -0.74               | -0.07              | 0.47                | -0.05              | 55.3                | 0.4                | 22.0                | 0.3                | 77.3                   | 0.7                   |
| ENSG00000106804 | C5            | -0.88               | -0.24              | 0.03                | -0.10              | 77.2                | 5.6                | 0.1                 | 0.9                | 77.3                   | 6.5                   |
| ENSG00000019582 | CD74          | -0.87               | -0.25              | -0.10               | -0.39              | 76.1                | 6.5                | 1.1                 | 14.8               | 77.2                   | 21.3                  |
| ENSG00000167705 | RILP          | -0.84               | -0.46              | 0.25                | 0.08               | 70.9                | 21.3               | 6.2                 | 0.6                | 77.1                   | 21.9                  |
| ENSG00000110060 | PUS3          | -0.80               | -0.48              | 0.36                | 0.67               | 64.2                | 22.6               | 12.9                | 45.2               | 77.1                   | 67.8                  |
| ENSG00000204396 | C6orf27       | 0.77                | 0.30               | 0.43                | -0.64              | 58.9                | 8.8                | 18.2                | 41.1               | 77.1                   | 49.9                  |
| ENSG00000198520 | C1orf228      | -0.87               | -0.79              | 0.08                | -0.33              | 76.2                | 63.0               | 0.6                 | 11.2               | 76.7                   | 74.2                  |
| ENSG00000002549 | LAP3          | -0.75               | -0.50              | 0.45                | -0.03              | 56.7                | 25.3               | 20.0                | 0.1                | 76.7                   | 25.3                  |
| ENSG00000153064 | BANK1         | -0.62               | -0.29              | -0.62               | 0.11               | 38.0                | 8.2                | 38.6                | 1.2                | 76.6                   | 9.3                   |
| ENSG00000114737 | CISH          | -0.65               | -0.09              | 0.59                | 0.21               | 42.1                | 0.9                | 34.5                | 4.4                | 76.6                   | 5.3                   |
| ENSG00000168405 | CMAHP         | -0.87               | -0.32              | 0.11                | -0.34              | 75.4                | 10.3               | 1.2                 | 11.6               | 76.6                   | 21.8                  |
| ENSG00000119522 | DENND1A       | -0.87               | 0.22               | -0.02               | -0.12              | 76.5                | 4.7                | 0.0                 | 1.5                | 76.6                   | 6.2                   |
| ENSG00000038210 | PI4K2B        | -0.78               | -0.13              | -0.39               | 0.14               | 61.6                | 1.7                | 15.0                | 1.9                | 76.5                   | 3.6                   |
| ENSG00000111110 | PPM1H         | 0.82                | -0.64              | 0.30                | -0.24              | 67.3                | 41.1               | 9.0                 | 5.7                | 76.4                   | 46.9                  |
| ENSG00000243811 | APOBEC3D      | -0.87               | -0.30              | -0.09               | 0.03               | 75.5                | 8.7                | 0.8                 | 0.1                | 76.3                   | 8.8                   |
| ENSG00000107796 | ACTA2         | -0.82               | 0.48               | 0.30                | 0.55               | 67.0                | 23.3               | 9.2                 | 30.5               | 76.2                   | 53.9                  |
| ENSG00000143110 | C1orf162      | 0.85                | -0.04              | -0.17               | -0.54              | 73.0                | 0.2                | 3.0                 | 29.6               | 76.0                   | 29.8                  |
| ENSG00000111328 | CDK2AP1       | 0.79                | 0.44               | 0.37                | -0.20              | 62.3                | 19.1               | 13.7                | 4.1                | 76.0                   | 23.2                  |
| ENSG00000067066 | SP100         | -0.86               | -0.08              | 0.15                | 0.40               | 73.6                | 0.7                | 2.3                 | 15.7               | 76.0                   | 16.4                  |

| Gene ID         | Gene Name     | G1<br>(SV-<br>AS03) | G1<br>(SV-<br>PBS) | G2<br>(SV-<br>AS03) | G2<br>(SV-<br>PBS) | V1<br>(SV-<br>AS03) | V1<br>(SV-<br>PBS) | V2<br>(SV-<br>AS03) | V2<br>(SV-<br>PBS) | V1+V2<br>(SV-<br>AS03) | V1+V2<br>(SV-<br>PBS) |
|-----------------|---------------|---------------------|--------------------|---------------------|--------------------|---------------------|--------------------|---------------------|--------------------|------------------------|-----------------------|
| ENSG00000106462 | EZH2          | -0.80               | 0.59               | 0.35                | -0.03              | 63.4                | 34.7               | 12.4                | 0.1                | 75.8                   | 34.9                  |
| ENSG00000152558 | TMEM123       | -0.86               | -0.32              | -0.15               | 0.03               | 73.4                | 10.5               | 2.4                 | 0.1                | 75.8                   | 10.6                  |
| ENSG00000108828 | VAT1          | -0.79               | 0.44               | 0.37                | -0.09              | 62.3                | 19.7               | 13.4                | 0.7                | 75.8                   | 20.4                  |
| ENSG00000244509 | APOBEC3C      | -0.87               | -0.75              | -0.06               | -0.09              | 75.3                | 56.2               | 0.4                 | 0.8                | 75.7                   | 57.0                  |
| ENSG00000143067 | ZNF697        | 0.84                | 0.04               | -0.24               | 0.55               | 70.1                | 0.1                | 5.6                 | 30.3               | 75.7                   | 30.4                  |
| ENSG00000159176 | CSRP1         | 0.73                | -0.39              | -0.48               | -0.56              | 52.8                | 15.5               | 22.8                | 31.6               | 75.6                   | 47.1                  |
| ENSG00000122547 | EEPD1         | 0.84                | -0.62              | -0.23               | -0.52              | 70.1                | 38.7               | 5.5                 | 26.7               | 75.6                   | 65.4                  |
| ENSG00000184224 | C11orf72      | -0.87               | 0.02               | -0.06               | 0.23               | 75.1                | 0.0                | 0.4                 | 5.3                | 75.5                   | 5.3                   |
| ENSG00000113273 | ARSB          | -0.85               | -0.29              | -0.17               | -0.41              | 72.4                | 8.1                | 3.0                 | 16.7               | 75.4                   | 24.9                  |
| ENSG00000139180 | NDUFA9        | -0.86               | 0.30               | 0.12                | 0.32               | 73.9                | 9.0                | 1.5                 | 10.3               | 75.4                   | 19.4                  |
| ENSG00000175073 | VCPIP1        | -0.78               | -0.28              | 0.37                | 0.11               | 61.5                | 7.9                | 13.8                | 1.2                | 75.4                   | 9.1                   |
| ENSG00000183621 | ZNF438        | -0.77               | 0.78               | 0.03                | 0.38               | 59.5                | 60.7               | 0.1                 | 14.6               | 59.6                   | 75.2                  |
| ENSG00000030110 | BAK1          | -0.87               | -0.46              | 0.03                | 0.07               | 75.1                | 21.4               | 0.1                 | 0.5                | 75.2                   | 21.9                  |
| ENSG00000131943 | C19orf12      | -0.83               | -0.39              | 0.25                | 0.08               | 68.8                | 15.4               | 6.3                 | 0.7                | 75.1                   | 16.1                  |
| ENSG00000087237 | CETP          | -0.83               | -0.12              | 0.26                | 0.51               | 68.3                | 1.4                | 6.7                 | 25.7               | 75.0                   | 27.1                  |
| ENSG00000138385 | SSB           | -0.84               | -0.38              | 0.22                | -0.07              | 70.2                | 14.1               | 4.9                 | 0.5                | 75.0                   | 14.6                  |
| ENSG00000187260 | WDR86         | -0.87               | 0.28               | -0.02               | 0.06               | 74.9                | 8.1                | 0.0                 | 0.3                | 74.9                   | 8.4                   |
| ENSG00000211896 | IGHG1         | -0.57               | -0.16              | -0.65               | -0.29              | 32.8                | 2.7                | 42.0                | 8.6                | 74.9                   | 11.3                  |
| ENSG00000155158 | TTC39B        | -0.85               | -0.48              | 0.17                | -0.34              | 71.6                | 23.0               | 3.1                 | 11.4               | 74.7                   | 34.4                  |
| ENSG00000255221 | CARD17        | -0.84               | -0.14              | -0.22               | -0.02              | 69.9                | 1.9                | 4.7                 | 0.0                | 74.6                   | 1.9                   |
| ENSG00000115415 | STAT1         | -0.85               | -0.40              | 0.13                | 0.29               | 72.8                | 16.0               | 1.7                 | 8.2                | 74.5                   | 24.2                  |
| ENSG00000241106 | HLA-DOB       | -0.86               | -0.00              | -0.02               | 0.15               | 74.5                | 0.0                | 0.0                 | 2.3                | 74.5                   | 2.3                   |
| ENSG00000051128 | HOMER3        | 0.86                | -0.30              | 0.07                | 0.02               | 73.9                | 9.1                | 0.5                 | 0.1                | 74.4                   | 9.2                   |
| ENSG00000181788 | SIAH2         | -0.78               | -0.39              | 0.36                | 0.41               | 61.3                | 14.9               | 13.0                | 16.5               | 74.3                   | 31.4                  |
| ENSG00000186265 | BTLA          | -0.67               | -0.26              | -0.55               | 0.40               | 44.4                | 6.9                | 29.8                | 15.8               | 74.2                   | 22.7                  |
| ENSG00000047579 | DTNBP1        | -0.59               | 0.45               | 0.63                | 0.17               | 34.4                | 20.5               | 39.8                | 2.8                | 74.1                   | 23.3                  |
| ENSG00000069020 | MAST4         | 0.54                | 0.86               | 0.17                | -0.06              | 29.5                | 73.7               | 3.0                 | 0.4                | 32.5                   | 74.1                  |
| ENSG00000105939 | ZC3HAV1       | -0.71               | 0.24               | 0.48                | 0.36               | 50.9                | 5.5                | 23.2                | 13.2               | 74.1                   | 18.8                  |
| ENSG00000176170 | SPHK1         | -0.78               | 0.60               | 0.37                | 0.09               | 60.4                | 36.2               | 13.7                | 0.9                | 74.1                   | 37.1                  |
| ENSG00000100889 | PCK2          | -0.86               | -0.34              | -0.04               | -0.45              | 73.8                | 11.8               | 0.2                 | 20.2               | 73.9                   | 32.0                  |
| ENSG00000143162 | CREG1         | -0.67               | -0.58              | 0.53                | 0.23               | 45.4                | 34.0               | 28.5                | 5.2                | 73.9                   | 39.1                  |
| ENSG00000225964 | AC017076.5    | -0.86               | -0.29              | 0.07                | 0.29               | 73.4                | 8.5                | 0.4                 | 8.7                | 73.8                   | 17.2                  |
| ENSG00000013583 | HEBP1         | -0.83               | -0.59              | -0.23               | -0.46              | 68.3                | 35.0               | 5.4                 | 21.6               | 73.8                   | 56.6                  |
| ENSG00000251136 | RP11-37B2.1   | -0.84               | 0.31               | 0.18                | 0.25               | 70.3                | 9.4                | 3.3                 | 6.2                | 73.7                   | 15.6                  |
| ENSG00000140853 | NLRC5         | -0.84               | -0.47              | 0.19                | 0.11               | 69.9                | 22.5               | 3.7                 | 1.3                | 73.6                   | 23.8                  |
| ENSG00000141086 | CTRL          | -0.84               | -0.11              | 0.17                | -0.09              | 70.6                | 1.2                | 2.8                 | 0.9                | 73.5                   | 2.1                   |
| ENSG00000178026 | C22orf36      | 0.58                | -0.76              | 0.13                | -0.40              | 33.2                | 57.5               | 1.6                 | 15.9               | 34.8                   | 73.4                  |
| ENSG00000131203 | IDO1          | -0.84               | -0.31              | -0.17               | 0.25               | 70.4                | 9.6                | 2.7                 | 6.4                | 73.1                   | 15.9                  |
| ENSG00000057657 | PRDM1         | -0.37               | -0.64              | 0.77                | 0.09               | 14.0                | 41.2               | 59.1                | 0.9                | 73.0                   | 42.1                  |
| ENSG00000233029 | RP11-439A17.9 | -0.81               | 0.11               | 0.28                | 0.61               | 65.3                | 1.2                | 7.7                 | 37.4               | 73.0                   | 38.6                  |
| ENSG00000127359 | KIAA1147      | 0.20                | -0.13              | -0.83               | -0.21              | 3.9                 | 1.6                | 69.0                | 4.3                | 72.8                   | 6.0                   |
| ENSG00000139318 | DUSP6         | -0.84               | -0.02              | 0.12                | 0.31               | 71.3                | 0.0                | 1.4                 | 9.6                | 72.8                   | 9.7                   |
| ENSG00000114770 | ABCC5         | 0.83                | -0.26              | 0.21                | 0.16               | 68.4                | 7.0                | 4.3                 | 2.7                | 72.6                   | 9.7                   |
| ENSG00000196154 | S100A4        | 0.84                | -0.30              | 0.13                | 0.21               | 70.8                | 8.8                | 1.8                 | 4.6                | 72.6                   | 13.4                  |
| ENSG00000224940 | PRRT4         | 0.72                | -0.25              | 0.46                | 0.02               | 51.4                | 6.4                | 21.1                | 0.0                | 72.5                   | 6.4                   |
| ENSG00000102796 | DHRS12        | -0.80               | 0.77               | 0.29                | 0.22               | 64.0                | 59.8               | 8.4                 | 4.9                | 72.4                   | 64.7                  |
| ENSG00000251442 | RP11-792D21.2 | -0.51               | 0.84               | -0.25               | 0.11               | 26.3                | 71.1               | 6.2                 | 1.3                | 32.5                   | 72.3                  |
| ENSG00000111300 | NAA25         | -0.85               | -0.34              | 0.07                | 0.35               | 71.7                | 11.6               | 0.5                 | 12.3               | 72.2                   | 23.9                  |
| ENSG00000072134 | EPN2          | 0.84                | -0.64              | -0.09               | 0.18               | 71.2                | 40.3               | 0.9                 | 3.4                | 72.1                   | 43.7                  |
| ENSG00000085063 | CD59          | -0.84               | 0.57               | 0.08                | 0.04               | 71.4                | 32.1               | 0.6                 | 0.1                | 72.0                   | 32.3                  |
| ENSG00000176595 | KBTBD11       | 0.85                | 0.19               | -0.01               | 0.18               | 71.6                | 3.5                | 0.0                 | 3.1                | 71.6                   | 6.6                   |

| Gene ID         | Gene Name     | G1<br>(SV-<br>AS03) | G1<br>(SV-<br>PBS) | G2<br>(SV-<br>AS03) | G2<br>(SV-<br>PBS) | V1<br>(SV-<br>AS03) | V1<br>(SV-<br>PBS) | V2<br>(SV-<br>AS03) | V2<br>(SV-<br>PBS) | V1+V2<br>(SV-<br>AS03) | V1+V2<br>(SV-<br>PBS) |
|-----------------|---------------|---------------------|--------------------|---------------------|--------------------|---------------------|--------------------|---------------------|--------------------|------------------------|-----------------------|
| ENSG00000185950 | IRS2          | 0.83                | 0.03               | 0.16                | -0.36              | 69.1                | 0.1                | 2.5                 | 13.0               | 71.6                   | 13.1                  |
| ENSG00000213373 | AC100793.2    | 0.84                | -0.12              | -0.05               | 0.17               | 71.3                | 1.5                | 0.3                 | 2.9                | 71.6                   | 4.4                   |
| ENSG00000173239 | LIPM          | -0.84               | -0.27              | 0.07                | 0.07               | 71.0                | 7.3                | 0.4                 | 0.5                | 71.4                   | 7.8                   |
| ENSG00000241666 | RP3-455J7.4   | -0.22               | -0.84              | -0.29               | 0.11               | 4.9                 | 70.2               | 8.1                 | 1.2                | 13.0                   | 71.4                  |
| ENSG00000118785 | SPP1          | 0.79                | 0.37               | 0.29                | 0.30               | 62.6                | 13.3               | 8.7                 | 8.9                | 71.2                   | 22.2                  |
| ENSG00000070190 | DAPP1         | -0.84               | -0.24              | 0.09                | -0.03              | 70.5                | 5.9                | 0.7                 | 0.1                | 71.2                   | 6.0                   |
| ENSG00000184887 | BTBD6         | 0.84                | -0.69              | 0.06                | 0.43               | 70.7                | 47.1               | 0.4                 | 18.6               | 71.1                   | 65.7                  |
| ENSG00000230438 | RP11-420G6.4  | -0.84               | 0.58               | -0.03               | 0.15               | 70.9                | 34.0               | 0.1                 | 2.2                | 71.0                   | 36.2                  |
| ENSG00000174004 | LRRRC33       | 0.78                | -0.43              | -0.33               | -0.13              | 60.2                | 18.9               | 10.8                | 1.7                | 71.0                   | 20.6                  |
| ENSG00000204634 | TBC1D8        | -0.40               | 0.84               | 0.19                | 0.05               | 15.9                | 70.7               | 3.7                 | 0.2                | 19.6                   | 71.0                  |
| ENSG00000109107 | ALDOC         | 0.81                | -0.18              | 0.22                | -0.46              | 66.1                | 3.1                | 4.8                 | 21.5               | 70.9                   | 24.6                  |
| ENSG00000135093 | USP30         | -0.84               | -0.12              | 0.07                | -0.09              | 70.3                | 1.5                | 0.5                 | 0.8                | 70.7                   | 2.2                   |
| ENSG00000105369 | CD79A         | -0.61               | -0.08              | -0.58               | -0.31              | 36.9                | 0.7                | 33.8                | 9.8                | 70.6                   | 10.5                  |
| ENSG00000100324 | TAB1          | 0.48                | -0.65              | -0.00               | -0.53              | 22.8                | 42.2               | 0.0                 | 28.3               | 22.8                   | 70.5                  |
| ENSG00000139572 | GPR84         | -0.54               | -0.52              | -0.00               | -0.66              | 29.3                | 27.1               | 0.0                 | 43.4               | 29.3                   | 70.5                  |
| ENSG00000146859 | TMEM140       | -0.78               | -0.28              | 0.30                | 0.27               | 61.4                | 7.7                | 9.1                 | 7.3                | 70.5                   | 15.0                  |
| ENSG00000119686 | AC007182.1    | -0.84               | 0.42               | 0.06                | 0.50               | 70.0                | 17.5               | 0.4                 | 24.5               | 70.4                   | 42.0                  |
| ENSG00000088827 | SIGLEC1       | -0.82               | -0.10              | 0.19                | 0.07               | 66.6                | 1.0                | 3.7                 | 0.5                | 70.2                   | 1.4                   |
| ENSG00000130881 | LRP3          | 0.79                | -0.11              | 0.28                | 0.12               | 62.1                | 1.2                | 8.1                 | 1.5                | 70.2                   | 2.6                   |
| ENSG00000015532 | XYLT2         | 0.76                | -0.29              | 0.35                | -0.39              | 57.9                | 8.3                | 12.2                | 15.3               | 70.1                   | 23.6                  |
| ENSG00000251002 | AE000661.37   | -0.83               | -0.58              | 0.10                | 0.50               | 69.1                | 33.4               | 0.9                 | 25.0               | 70.0                   | 58.3                  |
| ENSG00000068971 | PPP2R5B       | -0.72               | -0.70              | 0.42                | 0.30               | 52.1                | 48.6               | 17.9                | 9.1                | 70.0                   | 57.8                  |
| ENSG00000073737 | DHRS9         | -0.84               | -0.42              | 0.03                | 0.28               | 69.9                | 17.7               | 0.1                 | 7.9                | 70.0                   | 25.6                  |
| ENSG00000215068 | AC025171.1    | -0.80               | 0.23               | 0.26                | -0.18              | 63.4                | 5.5                | 6.5                 | 3.2                | 70.0                   | 8.7                   |
| ENSG00000088992 | TESC          | 0.83                | 0.32               | 0.11                | 0.12               | 68.8                | 10.5               | 1.1                 | 1.4                | 69.9                   | 11.9                  |
| ENSG00000091127 | PUS7          | 0.56                | -0.07              | -0.62               | -0.80              | 31.1                | 0.5                | 38.8                | 63.3               | 69.9                   | 63.7                  |
| ENSG00000236345 | RP11-59D5_B.2 | 0.81                | -0.29              | 0.19                | 0.27               | 66.1                | 8.3                | 3.5                 | 7.2                | 69.6                   | 15.5                  |
| ENSG00000133624 | ZNF767        | 0.79                | -0.02              | -0.26               | -0.05              | 62.8                | 0.0                | 6.8                 | 0.2                | 69.6                   | 0.2                   |
| ENSG00000108375 | RNF43         | -0.82               | 0.01               | 0.17                | 0.17               | 66.7                | 0.0                | 2.9                 | 2.9                | 69.6                   | 2.9                   |
| ENSG00000134470 | IL15RA        | -0.82               | 0.15               | 0.14                | -0.24              | 67.5                | 2.3                | 1.9                 | 5.7                | 69.4                   | 8.0                   |
| ENSG00000102755 | FLT1          | 0.83                | -0.12              | -0.01               | 0.22               | 69.4                | 1.3                | 0.0                 | 4.8                | 69.4                   | 6.2                   |
| ENSG00000169429 | IL8           | 0.83                | -0.49              | 0.05                | 0.35               | 69.1                | 23.9               | 0.3                 | 11.9               | 69.4                   | 35.9                  |
| ENSG00000182810 | DDX28         | 0.76                | -0.29              | -0.34               | 0.15               | 57.8                | 8.6                | 11.4                | 2.2                | 69.2                   | 10.8                  |
| ENSG00000164674 | SYTL3         | 0.81                | 0.08               | 0.19                | -0.18              | 65.4                | 0.6                | 3.6                 | 3.1                | 69.0                   | 3.7                   |
| ENSG00000100403 | ZC3H7B        | -0.82               | -0.16              | 0.12                | -0.49              | 67.4                | 2.5                | 1.6                 | 23.5               | 68.9                   | 26.1                  |
| ENSG00000069849 | ATP1B3        | -0.82               | 0.14               | 0.11                | -0.19              | 67.5                | 2.1                | 1.3                 | 3.5                | 68.8                   | 5.6                   |
| ENSG00000198019 | FCGR1B        | -0.80               | 0.42               | 0.22                | 0.35               | 63.8                | 17.5               | 4.9                 | 11.9               | 68.7                   | 29.4                  |
| ENSG00000121933 | ADORA3        | 0.81                | -0.07              | 0.17                | -0.48              | 65.9                | 0.4                | 2.8                 | 23.0               | 68.6                   | 23.4                  |
| ENSG00000096996 | IL12RB1       | -0.83               | -0.69              | -0.01               | -0.10              | 68.6                | 48.2               | 0.0                 | 1.0                | 68.6                   | 49.2                  |
| ENSG00000183134 | GPR44         | 0.00                | -0.77              | -0.09               | -0.30              | 0.0                 | 59.2               | 0.9                 | 9.2                | 0.9                    | 68.4                  |
| ENSG00000175730 | BAK1P1        | -0.69               | -0.10              | 0.45                | 0.34               | 47.8                | 1.0                | 20.6                | 11.8               | 68.4                   | 12.8                  |
| ENSG00000256812 | CAPNS2        | -0.80               | -0.04              | 0.19                | -0.06              | 64.7                | 0.1                | 3.7                 | 0.3                | 68.4                   | 0.5                   |
| ENSG00000156127 | BATF          | -0.45               | 0.18               | 0.70                | 0.07               | 20.0                | 3.3                | 48.4                | 0.5                | 68.3                   | 3.8                   |
| ENSG00000021762 | OSBPL5        | 0.82                | -0.54              | 0.05                | -0.06              | 68.0                | 29.6               | 0.3                 | 0.3                | 68.3                   | 29.9                  |
| ENSG00000135315 | KIAA1009      | -0.81               | -0.27              | 0.14                | 0.22               | 66.1                | 7.1                | 1.9                 | 4.7                | 68.1                   | 11.8                  |
| ENSG00000162946 | DISC1         | -0.71               | 0.82               | 0.04                | 0.09               | 50.7                | 67.0               | 0.1                 | 0.9                | 50.8                   | 67.9                  |
| ENSG00000134256 | CD101         | 0.80                | -0.68              | -0.18               | -0.12              | 64.6                | 45.9               | 3.3                 | 1.5                | 67.9                   | 47.5                  |
| ENSG00000213465 | ARL2          | -0.66               | 0.38               | 0.49                | 0.10               | 43.9                | 14.2               | 23.8                | 1.1                | 67.7                   | 15.3                  |
| ENSG00000102524 | TNFSF13B      | -0.81               | 0.27               | 0.15                | 0.03               | 65.3                | 7.2                | 2.2                 | 0.1                | 67.5                   | 7.4                   |
| ENSG00000149782 | PLCB3         | 0.70                | -0.04              | -0.43               | -0.01              | 49.1                | 0.2                | 18.2                | 0.0                | 67.4                   | 0.2                   |
| ENSG00000115419 | GLS           | -0.78               | -0.34              | 0.23                | 0.31               | 61.4                | 11.3               | 5.4                 | 9.4                | 66.7                   | 20.6                  |

| Gene ID         | Gene Name    | G1<br>(SV-<br>AS03) | G1<br>(SV-<br>PBS) | G2<br>(SV-<br>AS03) | G2<br>(SV-<br>PBS) | V1<br>(SV-<br>AS03) | V1<br>(SV-<br>PBS) | V2<br>(SV-<br>AS03) | V2<br>(SV-<br>PBS) | V1+V2<br>(SV-<br>AS03) | V1+V2<br>(SV-<br>PBS) |
|-----------------|--------------|---------------------|--------------------|---------------------|--------------------|---------------------|--------------------|---------------------|--------------------|------------------------|-----------------------|
| ENSG00000136826 | KLF4         | -0.50               | 0.17               | 0.64                | 0.32               | 25.2                | 2.9                | 41.4                | 10.1               | 66.6                   | 13.0                  |
| ENSG00000142089 | IFITM3       | -0.81               | 0.42               | -0.02               | -0.22              | 66.4                | 17.8               | 0.1                 | 4.7                | 66.5                   | 22.5                  |
| ENSG00000165806 | CASP7        | -0.81               | -0.47              | 0.05                | -0.01              | 66.0                | 22.0               | 0.3                 | 0.0                | 66.3                   | 22.1                  |
| ENSG00000226491 | AC098824.5   | 0.37                | 0.75               | -0.32               | 0.33               | 13.7                | 55.5               | 10.2                | 10.8               | 23.9                   | 66.3                  |
| ENSG00000117984 | CTSD         | 0.81                | -0.20              | 0.11                | -0.14              | 64.9                | 3.9                | 1.2                 | 1.9                | 66.1                   | 5.8                   |
| ENSG00000026751 | SLAMF7       | -0.81               | -0.05              | 0.07                | -0.15              | 65.7                | 0.2                | 0.4                 | 2.3                | 66.1                   | 2.5                   |
| ENSG00000178585 | CTNNBIP1     | 0.80                | -0.54              | 0.12                | 0.13               | 64.6                | 29.4               | 1.5                 | 1.7                | 66.1                   | 31.1                  |
| ENSG00000188042 | ARL4C        | -0.64               | -0.79              | -0.43               | 0.18               | 40.8                | 62.9               | 18.1                | 3.1                | 58.9                   | 66.0                  |
| ENSG00000202533 | Y_RNA_202533 | -0.80               | 0.04               | -0.12               | 0.73               | 64.6                | 0.2                | 1.4                 | 53.2               | 65.9                   | 53.4                  |
| ENSG00000122783 | C7orf49      | -0.79               | -0.22              | 0.19                | 0.26               | 62.1                | 5.0                | 3.8                 | 6.9                | 65.9                   | 11.9                  |
| ENSG00000255150 | EID3         | 0.37                | -0.49              | -0.36               | 0.65               | 13.4                | 24.1               | 13.1                | 41.6               | 26.4                   | 65.8                  |
| ENSG00000170558 | CDH2         | 0.74                | 0.27               | 0.34                | -0.11              | 54.1                | 7.5                | 11.3                | 1.2                | 65.4                   | 8.8                   |
| ENSG00000174697 | LEP          | 0.53                | 0.42               | 0.61                | 0.21               | 28.4                | 17.6               | 37.0                | 4.5                | 65.3                   | 22.0                  |
| ENSG00000234290 | AC116366.6   | -0.80               | 0.16               | 0.08                | 0.32               | 64.6                | 2.6                | 0.6                 | 10.0               | 65.2                   | 12.6                  |
| ENSG00000178719 | GRINA        | -0.70               | 0.57               | 0.41                | 0.13               | 48.3                | 32.4               | 16.8                | 1.7                | 65.1                   | 34.1                  |
| ENSG00000133313 | CNDP2        | -0.75               | -0.51              | 0.28                | -0.32              | 56.9                | 26.1               | 7.9                 | 10.1               | 64.9                   | 36.2                  |
| ENSG00000112053 | SLC26A8      | -0.49               | 0.79               | -0.05               | 0.16               | 24.2                | 62.3               | 0.3                 | 2.5                | 24.5                   | 64.8                  |
| ENSG00000189068 | VSTM1        | 0.69                | -0.75              | -0.42               | -0.13              | 47.4                | 56.2               | 17.3                | 1.7                | 64.8                   | 57.9                  |
| ENSG00000166145 | SPINT1       | 0.76                | -0.43              | -0.28               | -0.24              | 57.1                | 18.5               | 7.6                 | 5.8                | 64.7                   | 24.3                  |
| ENSG00000103154 | NECAB2       | 0.80                | 0.02               | 0.05                | -0.02              | 64.4                | 0.0                | 0.2                 | 0.0                | 64.7                   | 0.1                   |
| ENSG00000188820 | FAM26F       | -0.80               | -0.74              | -0.01               | -0.00              | 64.6                | 54.0               | 0.0                 | 0.0                | 64.7                   | 54.0                  |
| ENSG00000107020 | C9orf46      | -0.78               | 0.22               | 0.18                | 0.42               | 61.3                | 4.7                | 3.2                 | 17.9               | 64.5                   | 22.6                  |
| ENSG00000213366 | GSTM2        | 0.04                | -0.78              | -0.06               | -0.20              | 0.2                 | 60.6               | 0.3                 | 3.8                | 0.5                    | 64.4                  |
| ENSG00000197646 | PDCD1LG2     | -0.70               | -0.30              | -0.38               | 0.10               | 49.6                | 9.1                | 14.6                | 1.0                | 64.2                   | 10.1                  |
| ENSG00000178607 | ERN1         | 0.79                | 0.57               | 0.14                | -0.02              | 62.2                | 32.0               | 2.1                 | 0.0                | 64.2                   | 32.1                  |
| ENSG00000124215 | CDH26        | 0.80                | 0.65               | -0.06               | -0.21              | 63.8                | 41.6               | 0.3                 | 4.4                | 64.1                   | 46.0                  |
| ENSG00000113407 | TARS         | -0.74               | 0.21               | 0.30                | 0.26               | 55.2                | 4.4                | 8.9                 | 6.7                | 64.1                   | 11.1                  |
| ENSG00000123838 | C4BPA        | -0.80               | 0.29               | 0.09                | 0.12               | 63.3                | 8.7                | 0.8                 | 1.4                | 64.0                   | 10.1                  |
| ENSG00000143434 | SEMA6C       | 0.79                | -0.33              | 0.10                | 0.39               | 63.0                | 10.6               | 1.0                 | 15.1               | 64.0                   | 25.7                  |
| ENSG00000103056 | SMPD3        | 0.13                | -0.80              | -0.64               | -0.01              | 1.8                 | 63.7               | 40.8                | 0.0                | 42.6                   | 63.7                  |
| ENSG00000113552 | GNPDA1       | 0.79                | -0.49              | -0.06               | -0.29              | 63.2                | 23.9               | 0.4                 | 8.4                | 63.5                   | 32.2                  |
| ENSG00000123992 | DNPEP        | -0.79               | 0.21               | -0.06               | -0.45              | 63.1                | 4.6                | 0.4                 | 20.1               | 63.5                   | 24.7                  |
| ENSG00000141858 | SAMD1        | 0.71                | -0.71              | -0.37               | -0.22              | 49.9                | 50.8               | 13.4                | 5.1                | 63.3                   | 55.8                  |
| ENSG00000181826 | RELL1        | 0.75                | 0.25               | 0.27                | 0.17               | 56.0                | 6.4                | 7.3                 | 2.7                | 63.2                   | 9.2                   |
| ENSG00000163568 | AIM2         | -0.79               | 0.26               | -0.09               | 0.34               | 62.3                | 7.0                | 0.9                 | 11.8               | 63.1                   | 18.8                  |
| ENSG00000100336 | APOL4        | -0.79               | -0.42              | 0.05                | -0.18              | 62.9                | 18.0               | 0.2                 | 3.3                | 63.1                   | 21.3                  |
| ENSG00000163565 | IFI16        | -0.71               | 0.15               | 0.34                | 0.31               | 51.0                | 2.4                | 11.9                | 9.9                | 62.9                   | 12.3                  |
| ENSG00000143537 | ADAM15       | 0.78                | -0.08              | 0.13                | -0.10              | 61.2                | 0.7                | 1.6                 | 1.0                | 62.8                   | 1.7                   |
| ENSG00000145391 | SETD7        | -0.52               | 0.13               | -0.46               | 0.78               | 26.9                | 1.6                | 20.8                | 60.9               | 47.6                   | 62.5                  |
| ENSG00000124380 | SNRNP27      | -0.57               | -0.09              | 0.55                | 0.03               | 32.0                | 0.8                | 30.4                | 0.1                | 62.3                   | 0.9                   |
| ENSG00000121236 | TRIM6        | -0.78               | 0.16               | 0.11                | -0.05              | 60.9                | 2.7                | 1.2                 | 0.3                | 62.1                   | 3.0                   |
| ENSG00000130202 | PVRL2        | -0.64               | 0.23               | 0.46                | 0.21               | 40.7                | 5.4                | 21.4                | 4.3                | 62.1                   | 9.7                   |
| ENSG00000141013 | GAS8         | -0.73               | -0.20              | 0.29                | -0.11              | 53.7                | 4.1                | 8.4                 | 1.2                | 62.1                   | 5.3                   |
| ENSG00000059588 | TARBP1       | -0.64               | -0.16              | -0.45               | 0.45               | 41.4                | 2.7                | 20.7                | 20.4               | 62.1                   | 23.1                  |
| ENSG00000115761 | NOL10        | -0.54               | -0.14              | 0.57                | 0.62               | 29.0                | 1.9                | 33.0                | 37.9               | 62.0                   | 39.8                  |
| ENSG00000172985 | SH3RF3       | 0.67                | -0.51              | 0.41                | -0.21              | 45.1                | 25.9               | 16.7                | 4.2                | 61.8                   | 30.1                  |
| ENSG00000155366 | RHOC         | -0.77               | 0.26               | -0.14               | 0.41               | 59.8                | 6.9                | 1.9                 | 17.1               | 61.7                   | 24.0                  |
| ENSG00000181908 | AP003774.4   | -0.77               | -0.28              | -0.16               | 0.34               | 58.8                | 7.8                | 2.6                 | 11.5               | 61.4                   | 19.3                  |
| ENSG00000139618 | BRCA2        | -0.75               | -0.46              | 0.24                | 0.11               | 55.6                | 20.9               | 5.6                 | 1.3                | 61.2                   | 22.1                  |
| ENSG00000143847 | PPFIA4       | 0.39                | -0.32              | -0.68               | 0.09               | 15.2                | 10.5               | 46.0                | 0.8                | 61.2                   | 11.2                  |
| ENSG00000034239 | EFCAB1       | 0.71                | -0.16              | -0.32               | -0.21              | 50.8                | 2.5                | 10.0                | 4.2                | 60.8                   | 6.7                   |

| Gene ID         | Gene Name     | G1<br>(SV-<br>AS03) | G1<br>(SV-<br>PBS) | G2<br>(SV-<br>AS03) | G2<br>(SV-<br>PBS) | V1<br>(SV-<br>AS03) | V1<br>(SV-<br>PBS) | V2<br>(SV-<br>AS03) | V2<br>(SV-<br>PBS) | V1+V2<br>(SV-<br>AS03) | V1+V2<br>(SV-<br>PBS) |
|-----------------|---------------|---------------------|--------------------|---------------------|--------------------|---------------------|--------------------|---------------------|--------------------|------------------------|-----------------------|
| ENSG00000177542 | SLC25A22      | -0.78               | -0.09              | -0.03               | 0.37               | 60.7                | 0.8                | 0.1                 | 13.4               | 60.8                   | 14.2                  |
| ENSG00000243650 | AC010149.1    | -0.78               | 0.51               | -0.04               | 0.34               | 60.6                | 26.2               | 0.2                 | 11.4               | 60.8                   | 37.6                  |
| ENSG00000162066 | AMDHD2        | 0.78                | 0.00               | 0.03                | -0.23              | 60.7                | 0.0                | 0.1                 | 5.3                | 60.8                   | 5.3                   |
| ENSG00000155393 | HEATR3        | 0.67                | -0.20              | -0.40               | 0.15               | 45.0                | 3.9                | 15.8                | 2.3                | 60.8                   | 6.1                   |
| ENSG00000213928 | IRF9          | -0.76               | 0.07               | 0.17                | 0.23               | 57.9                | 0.5                | 2.8                 | 5.4                | 60.7                   | 5.9                   |
| ENSG00000130487 | KLHDC7B       | -0.58               | 0.72               | 0.31                | 0.29               | 33.5                | 51.8               | 9.4                 | 8.6                | 42.9                   | 60.4                  |
| ENSG00000089486 | C16orf5       | 0.77                | -0.11              | -0.09               | -0.48              | 59.5                | 1.2                | 0.8                 | 22.8               | 60.3                   | 24.0                  |
| ENSG00000161277 | THAP8         | 0.76                | -0.33              | -0.14               | 0.09               | 58.4                | 10.8               | 1.9                 | 0.8                | 60.3                   | 11.6                  |
| ENSG00000162813 | BPNT1         | -0.72               | -0.20              | 0.28                | -0.13              | 52.5                | 4.0                | 7.7                 | 1.6                | 60.2                   | 5.6                   |
| ENSG00000179832 | HEATR7A       | 0.69                | -0.26              | 0.36                | 0.04               | 47.1                | 6.8                | 13.0                | 0.2                | 60.0                   | 6.9                   |
| ENSG00000161981 | SNRNP25       | 0.76                | -0.63              | -0.12               | 0.08               | 58.4                | 39.8               | 1.6                 | 0.7                | 60.0                   | 40.5                  |
| ENSG00000138772 | ANXA3         | -0.18               | 0.74               | 0.10                | 0.21               | 3.3                 | 55.0               | 1.1                 | 4.6                | 4.4                    | 59.6                  |
| ENSG00000162073 | PAQR4         | 0.77                | -0.28              | -0.00               | -0.20              | 59.5                | 8.0                | 0.0                 | 4.1                | 59.5                   | 12.1                  |
| ENSG00000141837 | CACNA1A       | -0.60               | -0.20              | 0.23                | 0.74               | 36.3                | 3.9                | 5.4                 | 55.5               | 41.7                   | 59.4                  |
| ENSG00000140577 | CRTC3         | 0.77                | 0.20               | 0.08                | -0.24              | 58.7                | 4.1                | 0.7                 | 5.8                | 59.3                   | 9.9                   |
| ENSG00000102981 | PARD6A        | 0.77                | -0.35              | 0.08                | 0.02               | 58.7                | 12.2               | 0.6                 | 0.0                | 59.3                   | 12.3                  |
| ENSG00000205927 | OLIG2         | 0.74                | -0.27              | 0.22                | -0.01              | 54.6                | 7.4                | 4.7                 | 0.0                | 59.3                   | 7.4                   |
| ENSG00000105366 | SIGLEC8       | -0.17               | -0.63              | -0.34               | -0.44              | 2.9                 | 40.2               | 11.3                | 19.0               | 14.2                   | 59.2                  |
| ENSG00000143771 | CNIH4         | -0.40               | 0.73               | 0.42                | 0.25               | 16.3                | 52.8               | 17.9                | 6.3                | 34.2                   | 59.1                  |
| ENSG00000188483 | IER5L         | 0.77                | 0.57               | 0.03                | -0.10              | 59.0                | 32.6               | 0.1                 | 0.9                | 59.0                   | 33.6                  |
| ENSG00000119403 | PHF19         | 0.73                | 0.13               | -0.24               | -0.52              | 53.1                | 1.8                | 5.8                 | 27.0               | 58.9                   | 28.7                  |
| ENSG00000163517 | HDAC11        | 0.76                | 0.26               | 0.05                | -0.25              | 58.4                | 6.5                | 0.3                 | 6.5                | 58.6                   | 13.0                  |
| ENSG00000250608 | RP11-933H2.4  | -0.65               | 0.35               | 0.41                | 0.03               | 41.8                | 12.1               | 16.6                | 0.1                | 58.4                   | 12.2                  |
| ENSG00000176834 | VSIG10        | -0.76               | -0.10              | 0.04                | -0.12              | 58.1                | 1.0                | 0.1                 | 1.5                | 58.2                   | 2.6                   |
| ENSG00000237059 | AC083863.7    | -0.76               | 0.31               | 0.04                | -0.27              | 58.0                | 9.4                | 0.1                 | 7.5                | 58.1                   | 16.9                  |
| ENSG00000226067 | RP11-403I13.7 | -0.58               | -0.66              | -0.38               | 0.39               | 34.2                | 43.2               | 14.2                | 14.9               | 48.3                   | 58.1                  |
| ENSG00000165140 | FBP1          | 0.59                | -0.75              | 0.02                | -0.10              | 34.9                | 56.8               | 0.0                 | 1.1                | 35.0                   | 57.9                  |
| ENSG00000127838 | PNKD          | 0.73                | -0.32              | 0.21                | 0.35               | 53.5                | 10.5               | 4.4                 | 12.3               | 57.9                   | 22.9                  |
| ENSG00000231711 | RP11-398F12.1 | 0.76                | 0.57               | -0.07               | 0.46               | 57.4                | 32.9               | 0.5                 | 21.6               | 57.9                   | 54.5                  |
| ENSG00000065308 | TRAM2         | 0.69                | 0.20               | -0.33               | -0.31              | 47.2                | 4.1                | 10.6                | 9.4                | 57.8                   | 13.5                  |
| ENSG00000222179 | 7SK_222179    | -0.72               | -0.56              | 0.26                | -0.21              | 51.2                | 31.3               | 6.5                 | 4.4                | 57.7                   | 35.7                  |
| ENSG00000110852 | CLEC2B        | -0.74               | -0.28              | 0.16                | 0.41               | 55.2                | 8.1                | 2.5                 | 17.2               | 57.7                   | 25.3                  |
| ENSG00000167264 | DUS2L         | 0.71                | -0.60              | -0.27               | -0.22              | 50.5                | 36.4               | 7.2                 | 4.7                | 57.7                   | 41.1                  |
| ENSG00000130222 | GADD45G       | -0.64               | 0.41               | 0.41                | 0.04               | 40.7                | 17.2               | 16.8                | 0.2                | 57.5                   | 17.4                  |
| ENSG00000160716 | CHRN2         | -0.75               | -0.03              | 0.08                | -0.37              | 56.6                | 0.1                | 0.7                 | 13.4               | 57.3                   | 13.5                  |
| ENSG00000070729 | CNGB1         | -0.53               | 0.43               | -0.17               | -0.62              | 27.6                | 18.4               | 3.0                 | 38.9               | 30.6                   | 57.2                  |
| ENSG00000171045 | TSNARE1       | -0.20               | -0.75              | -0.15               | -0.07              | 3.9                 | 56.6               | 2.2                 | 0.5                | 6.1                    | 57.1                  |
| ENSG00000137752 | CASP1         | -0.73               | 0.41               | 0.18                | 0.63               | 53.6                | 16.4               | 3.3                 | 40.2               | 56.9                   | 56.6                  |
| ENSG00000059122 | FLYWCH1       | 0.25                | -0.59              | -0.36               | -0.47              | 6.0                 | 35.1               | 13.0                | 21.8               | 19.0                   | 56.9                  |
| ENSG00000136999 | NOV           | 0.74                | -0.72              | 0.02                | -0.21              | 54.7                | 52.4               | 0.0                 | 4.5                | 54.8                   | 56.9                  |
| ENSG00000179918 | SEPHS2        | -0.49               | -0.53              | 0.57                | -0.05              | 24.0                | 28.4               | 32.6                | 0.3                | 56.6                   | 28.6                  |
| ENSG00000185730 | ZNF696        | 0.03                | 0.08               | -0.75               | -0.15              | 0.1                 | 0.6                | 56.4                | 2.2                | 56.5                   | 2.9                   |
| ENSG00000164105 | SAP30         | 0.61                | -0.20              | 0.44                | -0.24              | 37.5                | 3.9                | 18.9                | 5.8                | 56.4                   | 9.8                   |
| ENSG00000184470 | TXNRD2        | 0.73                | -0.36              | -0.19               | -0.19              | 52.7                | 12.9               | 3.7                 | 3.6                | 56.4                   | 16.5                  |
| ENSG00000157551 | KCNJ15        | -0.71               | 0.45               | 0.24                | 0.56               | 50.8                | 20.4               | 5.5                 | 31.7               | 56.3                   | 52.1                  |
| ENSG00000104626 | ERI1          | -0.69               | 0.46               | 0.30                | 0.56               | 47.1                | 21.4               | 9.2                 | 31.6               | 56.3                   | 53.0                  |
| ENSG00000183696 | UPP1          | -0.31               | 0.72               | 0.27                | 0.20               | 9.3                 | 52.1               | 7.5                 | 4.0                | 16.9                   | 56.1                  |
| ENSG00000007516 | BAIAP3        | 0.68                | 0.03               | 0.32                | -0.09              | 46.0                | 0.1                | 10.0                | 0.7                | 56.0                   | 0.9                   |
| ENSG00000233214 | AC002511.2    | -0.73               | 0.27               | -0.14               | 0.31               | 53.8                | 7.3                | 2.0                 | 9.5                | 55.9                   | 16.8                  |
| ENSG00000106392 | C1GALT1       | -0.75               | -0.33              | -0.03               | 0.27               | 55.7                | 11.1               | 0.1                 | 7.2                | 55.8                   | 18.3                  |
| ENSG00000167515 | TRAPPC2L      | 0.63                | -0.12              | 0.40                | -0.21              | 39.8                | 1.4                | 16.0                | 4.6                | 55.8                   | 6.0                   |

| Gene ID         | Gene Name   | G1<br>(SV-<br>AS03) | G1<br>(SV-<br>PBS) | G2<br>(SV-<br>AS03) | G2<br>(SV-<br>PBS) | V1<br>(SV-<br>AS03) | V1<br>(SV-<br>PBS) | V2<br>(SV-<br>AS03) | V2<br>(SV-<br>PBS) | V1+V2<br>(SV-<br>AS03) | V1+V2<br>(SV-<br>PBS) |
|-----------------|-------------|---------------------|--------------------|---------------------|--------------------|---------------------|--------------------|---------------------|--------------------|------------------------|-----------------------|
| ENSG00000167074 | TEF         | 0.66                | -0.74              | -0.27               | -0.09              | 43.8                | 54.8               | 7.5                 | 0.8                | 51.2                   | 55.7                  |
| ENSG00000151136 | BTBD11      | 0.59                | -0.72              | 0.08                | -0.20              | 34.5                | 51.5               | 0.6                 | 4.1                | 35.1                   | 55.6                  |
| ENSG00000256579 | AC135776.2  | -0.74               | 0.02               | 0.04                | 0.10               | 55.3                | 0.0                | 0.2                 | 1.0                | 55.4                   | 1.1                   |
| ENSG00000213492 | AC092661.2  | -0.74               | -0.31              | 0.05                | 0.43               | 55.1                | 9.9                | 0.3                 | 18.6               | 55.4                   | 28.5                  |
| ENSG00000153406 | NMRAL1      | 0.67                | -0.38              | 0.32                | -0.56              | 45.2                | 14.6               | 10.1                | 31.5               | 55.3                   | 46.0                  |
| ENSG00000138166 | DUSP5       | -0.65               | 0.24               | 0.37                | 0.03               | 41.7                | 5.7                | 13.6                | 0.1                | 55.2                   | 5.7                   |
| ENSG00000204397 | CARD16      | -0.71               | 0.50               | -0.22               | 0.29               | 50.2                | 25.3               | 4.9                 | 8.5                | 55.1                   | 33.8                  |
| ENSG00000227032 | RP11-34E5.4 | -0.74               | -0.30              | 0.05                | -0.15              | 54.8                | 9.0                | 0.2                 | 2.1                | 55.0                   | 11.1                  |
| ENSG00000136231 | IGF2BP3     | -0.66               | -0.63              | 0.33                | -0.06              | 43.9                | 39.5               | 10.6                | 0.4                | 54.6                   | 39.9                  |
| ENSG00000103355 | PRSS33      | 0.01                | -0.69              | -0.49               | -0.27              | 0.0                 | 47.2               | 23.5                | 7.3                | 23.5                   | 54.5                  |
| ENSG00000187840 | EIF4EBP1    | 0.73                | -0.43              | -0.10               | -0.55              | 53.4                | 18.4               | 1.1                 | 30.0               | 54.5                   | 48.4                  |
| ENSG00000105516 | DBP         | 0.38                | -0.23              | -0.63               | -0.37              | 14.7                | 5.3                | 39.5                | 13.9               | 54.2                   | 19.2                  |
| ENSG00000205786 | AC002511.1  | -0.50               | 0.61               | -0.03               | 0.42               | 24.6                | 36.8               | 0.1                 | 17.3               | 24.7                   | 54.1                  |
| ENSG00000134242 | PTPN22      | 0.68                | -0.64              | -0.27               | 0.00               | 46.6                | 40.9               | 7.5                 | 0.0                | 54.1                   | 40.9                  |
| ENSG00000095397 | DFNB31      | -0.63               | 0.03               | -0.38               | 0.43               | 39.2                | 0.1                | 14.8                | 18.9               | 54.0                   | 19.0                  |
| ENSG00000188486 | H2AFX       | 0.72                | -0.06              | -0.16               | 0.06               | 51.5                | 0.4                | 2.4                 | 0.4                | 54.0                   | 0.8                   |
| ENSG00000111696 | NT5DC3      | 0.73                | -0.00              | -0.05               | -0.12              | 52.7                | 0.0                | 0.3                 | 1.5                | 52.9                   | 1.5                   |
| ENSG00000186918 | ZNF395      | 0.53                | -0.47              | -0.50               | -0.41              | 28.0                | 22.0               | 24.9                | 16.6               | 52.9                   | 38.6                  |
| ENSG00000082269 | FAM135A     | -0.70               | 0.02               | 0.18                | 0.11               | 49.3                | 0.0                | 3.4                 | 1.3                | 52.7                   | 1.3                   |
| ENSG00000184702 | SEPT5       | 0.72                | -0.26              | 0.09                | -0.28              | 51.3                | 6.6                | 0.8                 | 7.7                | 52.1                   | 14.3                  |
| ENSG00000076555 | ACACB       | 0.58                | -0.57              | -0.06               | -0.44              | 33.5                | 32.4               | 0.4                 | 19.7               | 33.9                   | 52.1                  |
| ENSG00000103876 | FAH         | 0.50                | -0.67              | 0.45                | -0.26              | 25.1                | 45.4               | 20.1                | 6.7                | 45.1                   | 52.1                  |
| ENSG00000127311 | HELB        | -0.58               | 0.15               | 0.43                | 0.36               | 33.7                | 2.2                | 18.2                | 13.1               | 51.9                   | 15.3                  |
| ENSG00000154188 | ANGPT1      | 0.63                | -0.70              | 0.14                | -0.18              | 39.2                | 48.5               | 1.9                 | 3.4                | 41.1                   | 51.9                  |
| ENSG00000137757 | CASP5       | -0.57               | 0.69               | 0.22                | 0.20               | 32.5                | 47.9               | 5.0                 | 4.0                | 37.4                   | 51.9                  |
| ENSG00000134072 | CAMK1       | 0.59                | -0.37              | -0.42               | -0.06              | 34.4                | 13.9               | 17.4                | 0.4                | 51.7                   | 14.2                  |
| ENSG00000168874 | ATOX8       | 0.52                | 0.24               | -0.02               | 0.68               | 27.2                | 5.7                | 0.0                 | 45.9               | 27.2                   | 51.6                  |
| ENSG00000205583 | STAG3L1     | 0.66                | -0.07              | -0.29               | -0.34              | 43.0                | 0.5                | 8.5                 | 11.6               | 51.5                   | 12.2                  |
| ENSG00000229894 | GK3P        | -0.58               | -0.14              | 0.43                | 0.28               | 33.3                | 2.0                | 18.1                | 8.0                | 51.4                   | 9.9                   |
| ENSG00000110799 | VWF         | 0.71                | -0.16              | 0.11                | -0.50              | 50.2                | 2.5                | 1.1                 | 25.4               | 51.3                   | 27.9                  |
| ENSG00000054179 | ENTPD2      | 0.71                | -0.02              | 0.08                | 0.00               | 50.8                | 0.0                | 0.6                 | 0.0                | 51.3                   | 0.0                   |
| ENSG00000165389 | C14orf147   | -0.70               | -0.23              | 0.15                | -0.08              | 48.7                | 5.5                | 2.4                 | 0.6                | 51.1                   | 6.1                   |
| ENSG00000134802 | SLC43A3     | -0.65               | -0.23              | 0.28                | -0.15              | 42.8                | 5.1                | 8.0                 | 2.4                | 50.8                   | 7.5                   |
| ENSG00000111731 | KIAA0528    | 0.44                | -0.70              | -0.06               | 0.07               | 19.7                | 49.7               | 0.3                 | 0.5                | 20.1                   | 50.1                  |
| ENSG00000132182 | NUP210      | -0.20               | -0.50              | -0.68               | -0.45              | 4.0                 | 24.5               | 46.0                | 19.9               | 50.0                   | 44.4                  |
| ENSG00000188282 | RUFY4       | -0.61               | 0.66               | -0.04               | 0.24               | 36.9                | 43.9               | 0.1                 | 5.7                | 37.1                   | 49.6                  |
| ENSG00000105205 | CLC         | 0.22                | -0.70              | -0.27               | -0.09              | 4.8                 | 48.6               | 7.1                 | 0.8                | 12.0                   | 49.4                  |
| ENSG00000159618 | GPR114      | -0.30               | -0.42              | -0.64               | -0.08              | 8.7                 | 18.0               | 40.7                | 0.6                | 49.4                   | 18.6                  |
| ENSG00000182541 | LIMK2       | -0.56               | 0.46               | 0.42                | 0.24               | 31.4                | 20.9               | 17.8                | 5.9                | 49.3                   | 26.8                  |
| ENSG00000006015 | C19orf60    | 0.67                | -0.24              | 0.20                | 0.03               | 45.2                | 5.8                | 3.9                 | 0.1                | 49.1                   | 5.9                   |
| ENSG00000230795 | HLA-K       | -0.45               | -0.07              | -0.54               | 0.44               | 20.1                | 0.5                | 28.8                | 19.7               | 48.9                   | 20.2                  |
| ENSG00000188313 | PLSCR1      | -0.70               | 0.60               | 0.03                | 0.32               | 48.8                | 35.9               | 0.1                 | 10.1               | 48.9                   | 46.0                  |
| ENSG00000143842 | SOX13       | 0.27                | -0.28              | 0.64                | -0.03              | 7.2                 | 7.6                | 41.3                | 0.1                | 48.5                   | 7.7                   |
| ENSG00000106537 | TSPAN13     | 0.45                | -0.69              | -0.46               | 0.03               | 20.5                | 48.2               | 20.9                | 0.1                | 41.4                   | 48.2                  |
| ENSG00000136002 | ARHGEF4     | 0.64                | -0.16              | 0.27                | 0.22               | 40.4                | 2.6                | 7.2                 | 4.7                | 47.6                   | 7.3                   |
| ENSG00000257017 | HP          | 0.43                | 0.68               | -0.21               | 0.09               | 18.7                | 46.5               | 4.3                 | 0.8                | 22.9                   | 47.3                  |
| ENSG00000134900 | TPP2        | 0.68                | -0.49              | 0.13                | -0.13              | 45.6                | 23.5               | 1.7                 | 1.6                | 47.3                   | 25.1                  |
| ENSG00000164096 | C4orf3      | -0.65               | 0.18               | 0.22                | 0.14               | 42.5                | 3.1                | 4.7                 | 1.8                | 47.2                   | 5.0                   |
| ENSG00000105948 | TTC26       | -0.49               | 0.55               | 0.48                | 0.14               | 24.3                | 29.8               | 22.9                | 2.0                | 47.2                   | 31.9                  |
| ENSG00000166881 | TMEM194A    | 0.53                | -0.40              | 0.43                | -0.07              | 28.4                | 15.9               | 18.8                | 0.5                | 47.1                   | 16.4                  |
| ENSG00000147443 | DOK2        | 0.19                | -0.65              | -0.45               | -0.21              | 3.6                 | 42.3               | 20.1                | 4.5                | 23.7                   | 46.7                  |

| Gene ID         | Gene Name     | G1<br>(SV-<br>AS03) | G1<br>(SV-<br>PBS) | G2<br>(SV-<br>AS03) | G2<br>(SV-<br>PBS) | V1<br>(SV-<br>AS03) | V1<br>(SV-<br>PBS) | V2<br>(SV-<br>AS03) | V2<br>(SV-<br>PBS) | V1+V2<br>(SV-<br>AS03) | V1+V2<br>(SV-<br>PBS) |
|-----------------|---------------|---------------------|--------------------|---------------------|--------------------|---------------------|--------------------|---------------------|--------------------|------------------------|-----------------------|
| ENSG00000130695 | CEP85         | -0.16               | -0.33              | -0.66               | -0.25              | 2.5                 | 10.8               | 44.2                | 6.2                | 46.7                   | 17.0                  |
| ENSG00000246013 | NCRNA00282    | -0.65               | 0.51               | 0.20                | 0.30               | 42.8                | 26.4               | 3.8                 | 8.8                | 46.6                   | 35.3                  |
| ENSG00000154274 | C4orf19       | 0.67                | 0.21               | 0.15                | 0.31               | 44.2                | 4.6                | 2.3                 | 9.4                | 46.6                   | 14.0                  |
| ENSG00000185880 | TRIM69        | -0.65               | 0.41               | 0.20                | 0.20               | 42.5                | 17.0               | 4.0                 | 4.0                | 46.4                   | 21.0                  |
| ENSG00000188549 | C15orf52      | 0.59                | -0.67              | 0.26                | -0.10              | 35.0                | 44.9               | 6.7                 | 1.0                | 41.7                   | 45.9                  |
| ENSG00000184979 | USP18         | -0.68               | -0.14              | 0.04                | -0.43              | 45.7                | 2.1                | 0.2                 | 18.4               | 45.8                   | 20.5                  |
| ENSG00000177606 | JUN           | 0.67                | -0.60              | -0.02               | -0.15              | 45.3                | 36.4               | 0.0                 | 2.4                | 45.3                   | 38.8                  |
| ENSG00000110042 | DTX4          | 0.49                | -0.59              | -0.45               | -0.32              | 24.5                | 34.8               | 20.5                | 10.5               | 45.0                   | 45.3                  |
| ENSG00000226942 | IL9RP3        | 0.66                | -0.30              | 0.14                | -0.24              | 43.1                | 9.1                | 2.1                 | 5.6                | 45.2                   | 14.7                  |
| ENSG00000231826 | AC016735.2    | 0.58                | -0.36              | 0.33                | 0.07               | 34.0                | 12.6               | 11.0                | 0.5                | 45.0                   | 13.1                  |
| ENSG00000161980 | POLR3K        | 0.67                | -0.20              | -0.03               | 0.08               | 44.9                | 4.0                | 0.1                 | 0.6                | 45.0                   | 4.6                   |
| ENSG00000229515 | RP11-793E15.1 | -0.24               | 0.43               | 0.23                | 0.52               | 5.8                 | 18.2               | 5.2                 | 26.8               | 11.0                   | 45.0                  |
| ENSG00000233461 | RP11-295G20.2 | -0.66               | 0.31               | 0.14                | 0.50               | 43.0                | 9.4                | 1.9                 | 25.4               | 44.9                   | 34.8                  |
| ENSG00000197586 | ENTPD6        | -0.66               | -0.63              | 0.08                | 0.22               | 43.8                | 39.9               | 0.6                 | 4.9                | 44.3                   | 44.8                  |
| ENSG00000004799 | PDK4          | 0.50                | -0.45              | 0.18                | 0.50               | 24.9                | 19.9               | 3.1                 | 24.9               | 28.0                   | 44.8                  |
| ENSG00000223759 | RP11-353N4.4  | -0.64               | 0.21               | 0.18                | 0.47               | 41.4                | 4.3                | 3.2                 | 22.2               | 44.6                   | 26.5                  |
| ENSG00000169683 | LRRC45        | 0.66                | -0.48              | -0.07               | 0.03               | 44.1                | 23.5               | 0.4                 | 0.1                | 44.5                   | 23.6                  |
| ENSG00000114631 | PODXL2        | 0.60                | 0.43               | -0.29               | -0.09              | 35.7                | 18.4               | 8.3                 | 0.8                | 44.0                   | 19.3                  |
| ENSG00000124772 | CPNE5         | -0.28               | 0.58               | -0.07               | -0.32              | 7.8                 | 34.0               | 0.5                 | 9.9                | 8.3                    | 43.9                  |
| ENSG00000247645 | AC034110.2    | 0.64                | -0.31              | -0.17               | 0.10               | 40.7                | 9.7                | 2.9                 | 1.0                | 43.7                   | 10.6                  |
| ENSG00000167106 | FAM102A       | -0.03               | -0.57              | -0.62               | -0.33              | 0.1                 | 32.2               | 37.9                | 11.1               | 37.9                   | 43.3                  |
| ENSG00000173762 | CD7           | -0.53               | -0.05              | 0.39                | 0.01               | 28.4                | 0.2                | 14.9                | 0.0                | 43.3                   | 0.2                   |
| ENSG00000164430 | MB21D1        | -0.44               | -0.31              | 0.49                | -0.47              | 19.1                | 9.9                | 24.2                | 22.3               | 43.3                   | 32.1                  |
| ENSG00000158445 | KCNB1         | 0.65                | 0.36               | -0.04               | -0.34              | 42.7                | 13.2               | 0.2                 | 11.6               | 42.9                   | 24.8                  |
| ENSG00000117318 | ID3           | -0.60               | 0.16               | 0.26                | -0.07              | 35.7                | 2.5                | 7.0                 | 0.5                | 42.6                   | 3.1                   |
| ENSG00000216588 | IGSF23        | 0.64                | -0.25              | -0.12               | -0.00              | 40.8                | 6.5                | 1.4                 | 0.0                | 42.2                   | 6.5                   |
| ENSG00000112759 | SLC29A1       | 0.47                | -0.56              | -0.45               | 0.03               | 22.0                | 31.0               | 20.1                | 0.1                | 42.1                   | 31.1                  |
| ENSG00000181350 | C17orf76      | 0.61                | -0.18              | -0.20               | -0.44              | 37.4                | 3.4                | 4.2                 | 19.0               | 41.6                   | 22.4                  |
| ENSG00000185420 | SMYD3         | 0.51                | -0.49              | -0.12               | -0.41              | 26.2                | 24.5               | 1.4                 | 17.1               | 27.6                   | 41.6                  |
| ENSG00000198825 | INPP5F        | 0.14                | 0.42               | -0.24               | 0.49               | 2.1                 | 17.6               | 6.0                 | 23.8               | 8.1                    | 41.4                  |
| ENSG00000187554 | TLR5          | -0.22               | 0.62               | 0.01                | 0.16               | 4.8                 | 38.5               | 0.0                 | 2.7                | 4.8                    | 41.1                  |
| ENSG00000068489 | PRR11         | -0.56               | -0.52              | -0.30               | -0.25              | 31.9                | 27.3               | 9.2                 | 6.2                | 41.1                   | 33.5                  |
| ENSG00000161905 | ALOX15        | 0.30                | -0.59              | -0.38               | -0.25              | 9.3                 | 34.7               | 14.7                | 6.1                | 24.0                   | 40.9                  |
| ENSG00000106004 | HOXA5         | 0.64                | -0.24              | 0.01                | 0.04               | 40.5                | 5.8                | 0.0                 | 0.2                | 40.5                   | 6.0                   |
| ENSG00000183762 | KREMEN1       | -0.62               | 0.49               | 0.12                | 0.11               | 38.8                | 23.5               | 1.5                 | 1.2                | 40.4                   | 24.7                  |
| ENSG00000103202 | NME4          | 0.57                | 0.38               | 0.28                | -0.28              | 32.4                | 14.6               | 7.9                 | 7.8                | 40.3                   | 22.4                  |
| ENSG00000162636 | FAM102B       | 0.58                | -0.35              | -0.24               | 0.07               | 34.1                | 12.1               | 5.9                 | 0.4                | 40.1                   | 12.5                  |
| ENSG00000133317 | LGALS12       | 0.42                | -0.55              | -0.10               | 0.31               | 18.0                | 30.5               | 1.0                 | 9.4                | 19.0                   | 39.9                  |
| ENSG00000137842 | TMEM62        | -0.63               | -0.17              | 0.07                | -0.44              | 39.5                | 3.0                | 0.4                 | 19.5               | 39.9                   | 22.6                  |
| ENSG00000204371 | EHMT2         | 0.63                | -0.09              | 0.03                | -0.30              | 39.6                | 0.8                | 0.1                 | 8.9                | 39.7                   | 9.7                   |
| ENSG00000104375 | STK3          | -0.55               | 0.61               | 0.23                | 0.11               | 30.7                | 37.2               | 5.3                 | 1.2                | 35.9                   | 38.4                  |
| ENSG00000225572 | AC003077.1    | -0.61               | 0.26               | 0.07                | -0.09              | 37.8                | 6.7                | 0.5                 | 0.8                | 38.3                   | 7.5                   |
| ENSG00000179242 | CDH4          | 0.47                | -0.06              | 0.39                | -0.40              | 22.1                | 0.4                | 15.1                | 16.1               | 37.2                   | 16.5                  |
| ENSG00000010278 | CD9           | 0.61                | -0.49              | -0.01               | -0.25              | 37.0                | 24.3               | 0.0                 | 6.2                | 37.0                   | 30.5                  |
| ENSG00000214425 | AC091132.2    | 0.32                | -0.36              | -0.05               | -0.49              | 10.2                | 12.7               | 0.3                 | 24.2               | 10.4                   | 36.9                  |
| ENSG00000144647 | C3orf39       | 0.60                | -0.29              | -0.05               | -0.21              | 36.4                | 8.6                | 0.3                 | 4.4                | 36.6                   | 13.0                  |
| ENSG00000204936 | CD177         | 0.16                | 0.51               | -0.16               | 0.33               | 2.5                 | 25.7               | 2.5                 | 11.0               | 5.0                    | 36.6                  |
| ENSG00000163958 | ZDHHC19       | -0.47               | 0.45               | 0.38                | 0.32               | 22.4                | 20.4               | 14.1                | 9.9                | 36.5                   | 30.3                  |
| ENSG00000237135 | RP11-330O11.2 | -0.42               | 0.29               | -0.23               | 0.53               | 17.4                | 8.6                | 5.3                 | 27.7               | 22.7                   | 36.3                  |
| ENSG00000162894 | FAIM3         | 0.26                | -0.60              | -0.29               | 0.01               | 6.7                 | 36.2               | 8.4                 | 0.0                | 15.1                   | 36.2                  |
| ENSG00000223779 | RP11-403I13.4 | -0.58               | -0.07              | -0.16               | 0.25               | 33.4                | 0.5                | 2.4                 | 6.1                | 35.9                   | 6.6                   |

| Gene ID         | Gene Name      | G1<br>(SV-<br>AS03) | G1<br>(SV-<br>PBS) | G2<br>(SV-<br>AS03) | G2<br>(SV-<br>PBS) | V1<br>(SV-<br>AS03) | V1<br>(SV-<br>PBS) | V2<br>(SV-<br>AS03) | V2<br>(SV-<br>PBS) | V1+V2<br>(SV-<br>AS03) | V1+V2<br>(SV-<br>PBS) |
|-----------------|----------------|---------------------|--------------------|---------------------|--------------------|---------------------|--------------------|---------------------|--------------------|------------------------|-----------------------|
| ENSG00000226012 | AP001434.2     | -0.37               | 0.18               | -0.10               | 0.57               | 14.0                | 3.1                | 1.0                 | 32.8               | 15.0                   | 35.9                  |
| ENSG00000134352 | IL6ST          | -0.51               | 0.47               | 0.31                | -0.01              | 26.1                | 22.4               | 9.7                 | 0.0                | 35.8                   | 22.5                  |
| ENSG00000165644 | COMTD1         | 0.16                | -0.18              | -0.07               | -0.57              | 2.5                 | 3.1                | 0.5                 | 32.6               | 3.0                    | 35.7                  |
| ENSG00000196954 | CASP4          | -0.58               | 0.38               | 0.16                | 0.32               | 33.2                | 14.5               | 2.4                 | 10.2               | 35.6                   | 24.7                  |
| ENSG00000108861 | DUSP3          | -0.58               | 0.36               | 0.15                | 0.38               | 33.2                | 13.1               | 2.2                 | 14.6               | 35.5                   | 27.7                  |
| ENSG00000023909 | GCLM           | -0.17               | -0.33              | 0.57                | 0.27               | 2.8                 | 10.8               | 32.5                | 7.1                | 35.4                   | 17.9                  |
| ENSG00000105270 | CLIP3          | 0.57                | -0.41              | 0.15                | -0.06              | 32.9                | 17.1               | 2.3                 | 0.4                | 35.2                   | 17.5                  |
| ENSG00000248936 | RP11-36B15.1   | 0.47                | 0.31               | 0.02                | 0.48               | 22.3                | 9.7                | 0.1                 | 23.4               | 22.4                   | 33.1                  |
| ENSG00000141577 | AZI1           | 0.30                | 0.14               | 0.48                | -0.38              | 8.9                 | 2.0                | 23.2                | 14.6               | 32.1                   | 16.5                  |
| ENSG00000242313 | AC002073.1     | 0.40                | 0.02               | -0.40               | -0.19              | 16.2                | 0.0                | 15.8                | 3.7                | 32.0                   | 3.7                   |
| ENSG00000169413 | RNASE6         | 0.32                | -0.56              | 0.34                | -0.01              | 9.9                 | 31.1               | 11.8                | 0.0                | 21.7                   | 31.1                  |
| ENSG00000229023 | AC067945.3     | -0.04               | 0.03               | 0.14                | 0.55               | 0.1                 | 0.1                | 2.0                 | 30.6               | 2.2                    | 30.6                  |
| ENSG00000244490 | RWDD4P1        | 0.35                | -0.42              | -0.02               | 0.36               | 12.0                | 17.7               | 0.0                 | 12.8               | 12.0                   | 30.5                  |
| ENSG00000146215 | CRIP3          | 0.10                | 0.52               | -0.47               | -0.18              | 0.9                 | 27.1               | 22.3                | 3.2                | 23.3                   | 30.3                  |
| ENSG00000008710 | PKD1           | -0.10               | 0.03               | -0.50               | -0.55              | 1.0                 | 0.1                | 25.0                | 30.1               | 26.0                   | 30.2                  |
| ENSG00000230124 | RP5-1180C10.2  | 0.53                | 0.18               | 0.11                | 0.41               | 28.3                | 3.3                | 1.2                 | 16.8               | 29.4                   | 20.1                  |
| ENSG00000214106 | AC093726.6     | -0.49               | 0.31               | -0.22               | -0.22              | 24.4                | 9.3                | 4.9                 | 4.8                | 29.3                   | 14.1                  |
| ENSG00000109685 | WHSC1          | 0.38                | -0.32              | -0.26               | -0.44              | 14.6                | 10.0               | 7.0                 | 19.0               | 21.6                   | 29.0                  |
| ENSG00000224073 | RP1-56L9.7     | -0.49               | 0.31               | -0.03               | 0.44               | 24.2                | 9.4                | 0.1                 | 19.6               | 24.3                   | 29.0                  |
| ENSG00000245549 | AL137798.2     | -0.07               | -0.07              | -0.13               | 0.53               | 0.5                 | 0.5                | 1.7                 | 28.3               | 2.2                    | 28.8                  |
| ENSG00000119457 | SLC46A2        | 0.43                | 0.22               | -0.32               | 0.19               | 18.3                | 4.7                | 10.2                | 3.8                | 28.4                   | 8.4                   |
| ENSG00000164023 | SGMS2          | 0.38                | 0.53               | -0.24               | -0.05              | 14.7                | 27.7               | 5.7                 | 0.3                | 20.4                   | 27.9                  |
| ENSG00000185087 | FAM169B        | -0.34               | -0.11              | 0.40                | 0.09               | 11.7                | 1.2                | 15.9                | 0.9                | 27.7                   | 2.1                   |
| ENSG00000226742 | HSBP1L1        | -0.52               | 0.28               | 0.09                | -0.36              | 26.9                | 8.1                | 0.7                 | 12.7               | 27.7                   | 20.8                  |
| ENSG00000141854 | AC022098.1     | 0.25                | 0.32               | -0.32               | 0.42               | 6.5                 | 10.3               | 10.5                | 17.3               | 17.0                   | 27.6                  |
| ENSG00000116990 | MYCL1          | 0.42                | 0.29               | -0.32               | -0.21              | 17.3                | 8.3                | 10.2                | 4.6                | 27.4                   | 12.9                  |
| ENSG00000165490 | C11orf82       | -0.43               | 0.08               | -0.29               | 0.50               | 18.7                | 0.7                | 8.5                 | 25.4               | 27.2                   | 26.1                  |
| ENSG00000237520 | RP11-443B7.2   | 0.08                | 0.42               | -0.04               | 0.31               | 0.7                 | 17.5               | 0.2                 | 9.6                | 0.8                    | 27.2                  |
| ENSG00000182621 | PLCB1          | 0.52                | -0.19              | -0.05               | -0.03              | 26.7                | 3.8                | 0.2                 | 0.1                | 26.9                   | 3.9                   |
| ENSG00000185897 | FFAR3          | -0.42               | 0.47               | 0.25                | -0.21              | 17.6                | 22.4               | 6.2                 | 4.3                | 23.8                   | 26.8                  |
| ENSG00000253214 | RP11-1149M10.2 | -0.45               | 0.51               | 0.21                | -0.06              | 20.3                | 26.2               | 4.3                 | 0.4                | 24.6                   | 26.6                  |
| ENSG00000175040 | CHST2          | -0.10               | 0.06               | -0.16               | 0.51               | 0.9                 | 0.3                | 2.6                 | 26.3               | 3.5                    | 26.6                  |
| ENSG00000243477 | NAT6           | 0.36                | 0.32               | -0.36               | 0.17               | 12.9                | 10.5               | 13.3                | 2.8                | 26.2                   | 13.3                  |
| ENSG00000117983 | MUC5B          | 0.35                | 0.24               | -0.37               | 0.38               | 12.1                | 5.5                | 13.8                | 14.3               | 25.9                   | 19.9                  |
| ENSG00000233038 | AC011899.9     | 0.47                | -0.31              | -0.19               | -0.38              | 22.1                | 9.6                | 3.7                 | 14.1               | 25.8                   | 23.7                  |
| ENSG00000179715 | FAM113B        | -0.48               | -0.16              | 0.16                | -0.30              | 23.2                | 2.4                | 2.4                 | 8.9                | 25.7                   | 11.3                  |
| ENSG00000235944 | ZNF815         | 0.50                | -0.29              | 0.09                | -0.37              | 24.9                | 8.2                | 0.8                 | 13.8               | 25.7                   | 22.0                  |
| ENSG00000223692 | AP000337.3     | 0.39                | 0.04               | -0.32               | -0.44              | 15.2                | 0.2                | 10.2                | 19.2               | 25.4                   | 19.4                  |
| ENSG00000141569 | TRIM65         | -0.09               | 0.25               | -0.48               | -0.43              | 0.8                 | 6.1                | 23.1                | 18.9               | 23.9                   | 25.0                  |
| ENSG00000198892 | SHISA4         | 0.50                | 0.14               | 0.03                | -0.11              | 24.8                | 2.1                | 0.1                 | 1.2                | 24.9                   | 3.3                   |
| ENSG00000124713 | GNMT           | 0.33                | -0.09              | 0.37                | -0.17              | 11.0                | 0.9                | 13.8                | 3.0                | 24.8                   | 3.9                   |
| ENSG00000125457 | MIF4GD         | 0.33                | -0.15              | 0.37                | -0.31              | 11.1                | 2.3                | 13.6                | 9.4                | 24.7                   | 11.7                  |
| ENSG00000146373 | RNF217         | -0.27               | 0.08               | 0.41                | 0.40               | 7.5                 | 0.6                | 17.0                | 16.0               | 24.5                   | 16.6                  |
| ENSG00000204257 | HLA-DMA        | -0.47               | -0.28              | 0.12                | 0.06               | 22.5                | 7.7                | 1.5                 | 0.3                | 24.0                   | 8.0                   |
| ENSG00000255139 | AP000442.1     | -0.23               | 0.01               | 0.43                | -0.35              | 5.1                 | 0.0                | 18.9                | 12.4               | 24.0                   | 12.4                  |
| ENSG00000148334 | PTGES2         | 0.41                | -0.39              | -0.26               | 0.10               | 16.8                | 15.3               | 6.9                 | 1.1                | 23.7                   | 16.4                  |
| ENSG00000238249 | HMG2P17        | 0.30                | -0.04              | -0.05               | 0.48               | 8.9                 | 0.2                | 0.2                 | 23.4               | 9.2                    | 23.6                  |
| ENSG00000181610 | MRPS23         | 0.23                | -0.08              | -0.43               | -0.04              | 5.4                 | 0.6                | 18.1                | 0.2                | 23.5                   | 0.8                   |
| ENSG00000179094 | PER1           | 0.41                | 0.09               | 0.21                | -0.47              | 17.0                | 0.8                | 4.3                 | 21.9               | 21.3                   | 22.7                  |
| ENSG00000154102 | C16orf74       | 0.24                | 0.31               | -0.41               | -0.08              | 5.9                 | 9.6                | 16.8                | 0.7                | 22.6                   | 10.3                  |
| ENSG00000163357 | DCST1          | 0.21                | 0.04               | 0.42                | -0.07              | 4.2                 | 0.2                | 18.1                | 0.5                | 22.3                   | 0.7                   |



| Gene ID         | Gene Name     | G1<br>(SV-<br>AS03) | G1<br>(SV-<br>PBS) | G2<br>(SV-<br>AS03) | G2<br>(SV-<br>PBS) | V1<br>(SV-<br>AS03) | V1<br>(SV-<br>PBS) | V2<br>(SV-<br>AS03) | V2<br>(SV-<br>PBS) | V1+V2<br>(SV-<br>AS03) | V1+V2<br>(SV-<br>PBS) |
|-----------------|---------------|---------------------|--------------------|---------------------|--------------------|---------------------|--------------------|---------------------|--------------------|------------------------|-----------------------|
| ENSG00000163746 | PLSCR2        | -0.46               | -0.19              | 0.10                | 0.07               | 20.9                | 3.6                | 0.9                 | 0.5                | 21.8                   | 4.2                   |
| ENSG00000134824 | FADS2         | 0.46                | 0.16               | 0.05                | -0.30              | 21.5                | 2.7                | 0.3                 | 8.9                | 21.8                   | 11.6                  |
| ENSG00000225792 | AC004540.4    | -0.41               | -0.06              | 0.22                | 0.41               | 16.8                | 0.3                | 5.0                 | 17.1               | 21.7                   | 17.5                  |
| ENSG00000157404 | KIT           | 0.35                | -0.46              | 0.24                | -0.04              | 11.9                | 21.3               | 5.5                 | 0.2                | 17.5                   | 21.5                  |
| ENSG00000244242 | IFITM10       | 0.46                | -0.32              | 0.08                | 0.29               | 20.8                | 10.6               | 0.7                 | 8.2                | 21.5                   | 18.7                  |
| ENSG00000090269 | CLEC5A        | -0.22               | -0.11              | -0.40               | 0.01               | 5.0                 | 1.1                | 15.7                | 0.0                | 20.7                   | 1.1                   |
| ENSG00000135847 | ACBD6         | 0.24                | -0.38              | -0.38               | 0.24               | 5.9                 | 14.5               | 14.3                | 5.6                | 20.2                   | 20.1                  |
| ENSG00000137094 | DNAJB5        | 0.41                | 0.25               | -0.07               | 0.37               | 16.4                | 6.1                | 0.5                 | 13.9               | 16.9                   | 19.9                  |
| ENSG00000104804 | TULP2         | 0.10                | 0.23               | 0.43                | 0.27               | 0.9                 | 5.5                | 18.8                | 7.4                | 19.8                   | 12.8                  |
| ENSG00000224804 | AC004878.2    | -0.18               | -0.30              | -0.31               | -0.31              | 3.2                 | 9.1                | 9.8                 | 9.7                | 13.0                   | 18.8                  |
| ENSG00000242498 | C15orf38      | -0.25               | 0.16               | 0.11                | -0.40              | 6.1                 | 2.6                | 1.3                 | 15.9               | 7.3                    | 18.5                  |
| ENSG00000073060 | SCARB1        | 0.38                | -0.17              | 0.19                | 0.02               | 14.5                | 3.0                | 3.7                 | 0.0                | 18.2                   | 3.0                   |
| ENSG00000100997 | ABHD12        | 0.22                | -0.20              | 0.37                | -0.20              | 4.7                 | 3.9                | 13.4                | 4.0                | 18.1                   | 7.9                   |
| ENSG00000159713 | TPPP3         | 0.26                | -0.01              | -0.15               | 0.42               | 6.8                 | 0.0                | 2.3                 | 17.7               | 9.0                    | 17.7                  |
| ENSG00000168685 | IL7R          | -0.17               | -0.42              | 0.21                | -0.06              | 3.0                 | 17.3               | 4.4                 | 0.3                | 7.4                    | 17.6                  |
| ENSG00000114541 | FRMD4B        | -0.41               | -0.17              | 0.08                | 0.38               | 16.6                | 3.0                | 0.6                 | 14.5               | 17.2                   | 17.5                  |
| ENSG00000053371 | AKR7A2        | 0.23                | 0.22               | -0.34               | 0.29               | 5.3                 | 4.9                | 11.4                | 8.3                | 16.7                   | 13.2                  |
| ENSG00000116237 | ICMT          | 0.32                | -0.17              | -0.02               | 0.37               | 10.2                | 3.0                | 0.0                 | 13.5               | 10.2                   | 16.5                  |
| ENSG00000116455 | WDR77         | -0.17               | -0.35              | 0.25                | -0.17              | 3.0                 | 12.5               | 6.3                 | 3.1                | 9.3                    | 15.6                  |
| ENSG00000073350 | LLGL2         | 0.01                | 0.16               | -0.39               | -0.22              | 0.0                 | 2.5                | 15.3                | 5.0                | 15.3                   | 7.5                   |
| ENSG00000174837 | EMR1          | -0.01               | -0.38              | 0.02                | 0.03               | 0.0                 | 14.6               | 0.0                 | 0.1                | 0.1                    | 14.7                  |
| ENSG00000167969 | ECI1          | 0.30                | 0.24               | 0.03                | -0.29              | 8.7                 | 5.6                | 0.1                 | 8.7                | 8.8                    | 14.2                  |
| ENSG00000196814 | FAM125B       | 0.35                | -0.33              | -0.14               | 0.01               | 12.1                | 10.8               | 1.9                 | 0.0                | 14.0                   | 10.8                  |
| ENSG00000224460 | RP11-439L18.2 | -0.18               | 0.18               | -0.31               | 0.06               | 3.3                 | 3.3                | 9.7                 | 0.3                | 13.0                   | 3.6                   |
| ENSG00000146540 | C7orf50       | 0.26                | -0.18              | -0.25               | 0.04               | 6.7                 | 3.1                | 6.1                 | 0.2                | 12.8                   | 3.2                   |
| ENSG00000125538 | IL1B          | -0.29               | -0.13              | 0.20                | 0.13               | 8.2                 | 1.8                | 4.1                 | 1.8                | 12.3                   | 3.6                   |
| ENSG00000121454 | LHX4          | 0.05                | -0.22              | -0.15               | 0.27               | 0.3                 | 4.8                | 2.1                 | 7.4                | 2.4                    | 12.3                  |
| ENSG00000171962 | LRRC48        | 0.03                | -0.04              | -0.33               | -0.34              | 0.1                 | 0.2                | 11.1                | 11.7               | 11.2                   | 11.9                  |
| ENSG00000199695 | U6_199695     | -0.21               | 0.18               | 0.05                | -0.27              | 4.6                 | 3.4                | 0.3                 | 7.5                | 4.8                    | 10.9                  |
| ENSG00000103254 | FAM173A       | -0.17               | 0.24               | -0.26               | 0.03               | 3.0                 | 5.7                | 6.8                 | 0.1                | 9.7                    | 5.8                   |
| ENSG00000179915 | NRXN1         | 0.14                | -0.10              | -0.26               | 0.26               | 2.0                 | 1.0                | 6.5                 | 6.9                | 8.6                    | 7.9                   |
| ENSG00000196636 | ACN9          | 0.03                | 0.22               | 0.16                | 0.14               | 0.1                 | 4.7                | 2.5                 | 2.1                | 2.6                    | 6.8                   |
| ENSG00000172728 | FUT10         | -0.05               | 0.13               | 0.25                | -0.20              | 0.3                 | 1.7                | 6.3                 | 4.2                | 6.6                    | 5.9                   |
| ENSG00000236829 | Z97634.5      | 0.05                | 0.03               | 0.21                | -0.04              | 0.2                 | 0.1                | 4.2                 | 0.2                | 4.5                    | 0.3                   |
| ENSG00000038427 | VCAN          | -0.19               | -0.03              | 0.05                | -0.17              | 3.7                 | 0.1                | 0.3                 | 3.0                | 4.0                    | 3.1                   |
| ENSG00000127564 | PKMYT1        | 0.06                | 0.07               | -0.04               | -0.14              | 0.4                 | 0.5                | 0.1                 | 1.9                | 0.6                    | 2.4                   |
| ENSG00000090924 | PLEKHG2       | -0.04               | -0.01              | 0.11                | 0.09               | 0.1                 | 0.0                | 1.2                 | 0.8                | 1.3                    | 0.8                   |

**Table A138:** Canonical loadings and explained variance (RNA-Seq, Neutrophils, Day 1, Gene variables). Gene variables with at least 25% of explained variance for the first two canonical variates are listed. GX: canonical loadings for canonical variate X, VX: % explained variance for canonical variate X, V1+V2: total % explained variance for both canonical variates. Values for CCA results with a poor cross validation score (< 0.70) are left blank. Sorted by maximum explained variance across treatments (V1+V2).

| IMO Vari-<br>able | IMO Variable Name                   | I1<br>(SV-<br>AS03) | I1<br>(SV-<br>PBS) | I2<br>(SV-<br>AS03) | I2<br>(SV-<br>PBS) | V1<br>(SV-<br>AS03) | V1<br>(SV-<br>PBS) | V2<br>(SV-<br>AS03) | V2<br>(SV-<br>PBS) | V1+V2<br>(SV-<br>AS03) | V1+V2<br>(SV-<br>PBS) |
|-------------------|-------------------------------------|---------------------|--------------------|---------------------|--------------------|---------------------|--------------------|---------------------|--------------------|------------------------|-----------------------|
| IL-12p70          | Interleukin-12 p70                  | 0.01                | -0.93              | 0.22                | -0.29              | 0.0                 | 86.3               | 4.9                 | 8.6                | 5.0                    | 95.0                  |
| IP-10             | Interferon gamma-induced protein 10 | -0.88               | 0.62               | -0.21               | -0.48              | 77.1                | 38.9               | 4.5                 | 23.1               | 81.7                   | 62.0                  |
| MIP-1 $\alpha$    | Macrophage inflammatory protein     | -0.75               | 0.54               | -0.39               | -0.65              | 56.5                | 29.2               | 14.9                | 42.4               | 71.5                   | 71.6                  |

| IMO Variable  | IMO Variable Name                  | I1<br>(SV-<br>AS03) | I1<br>(SV-<br>PBS) | I2<br>(SV-<br>AS03) | I2<br>(SV-<br>PBS) | V1<br>(SV-<br>AS03) | V1<br>(SV-<br>PBS) | V2<br>(SV-<br>AS03) | V2<br>(SV-<br>PBS) | V1+V2<br>(SV-<br>AS03) | V1+V2<br>(SV-<br>PBS) |
|---------------|------------------------------------|---------------------|--------------------|---------------------|--------------------|---------------------|--------------------|---------------------|--------------------|------------------------|-----------------------|
| IFN- $\gamma$ | Interferon gamma                   | 0.41                | 0.40               | -0.17               | -0.70              | 16.9                | 15.8               | 2.8                 | 49.2               | 19.7                   | 65.0                  |
| Eotaxin-1     | Eotaxin-1                          | 0.38                | -0.73              | 0.53                | -0.31              | 14.3                | 53.2               | 28.5                | 9.5                | 42.8                   | 62.6                  |
| RANTES        | Chemokine (C-C motif) ligand 5     | -0.31               | 0.10               | 0.02                | -0.74              | 9.3                 | 1.0                | 0.1                 | 54.8               | 9.4                    | 55.8                  |
| Nt            | Microneutralization inhibition     | -0.03               | 0.49               | 0.14                | 0.44               | 0.1                 | 23.6               | 2.0                 | 19.8               | 2.1                    | 43.4                  |
| TNF           | Tumor necrosis factors             | 0.41                | -0.09              | 0.33                | -0.12              | 16.5                | 0.8                | 11.1                | 1.4                | 27.7                   | 2.2                   |
| IL-10         | Interleukin-10                     | -0.19               | 0.00               | 0.24                | -0.41              | 3.8                 | 0.0                | 5.7                 | 16.6               | 9.5                    | 16.6                  |
| IL-8          | Interleukin-8                      | 0.16                | -0.07              | 0.17                | -0.34              | 2.6                 | 0.4                | 2.9                 | 11.6               | 5.5                    | 12.0                  |
| IL-1 $\beta$  | Interleukin-1 beta                 | -0.21               | 0.29               | -0.27               | -0.17              | 4.6                 | 8.4                | 7.3                 | 3.0                | 11.9                   | 11.4                  |
| MCP-1         | Monocyte chemoattractant protein-1 | 0.01                | 0.10               | 0.21                | -0.30              | 0.0                 | 1.0                | 4.2                 | 9.2                | 4.2                    | 10.1                  |
| IL-6          | Interleukin-6                      | -0.19               | 0.19               | 0.21                | -0.24              | 3.4                 | 3.7                | 4.4                 | 5.7                | 7.8                    | 9.4                   |

**Table A139:** Canonical loadings and explained variance (RNA-Seq, Neutrophils, Day 1, IMO variables). IMO variables with at least 25% of explained variance for the first two canonical variates are listed. GX: canonical loadings for canonical variate X, VX: % explained variance for canonical variate X, V1+V2: total % explained variance for both canonical variates. Values for CCA results with a poor cross validation score ( $< 0.70$ ) are left blank. Sorted by maximum explained variance across treatments (V1+V2).

| Gene ID         | Gene Name     | G1<br>(SV-<br>AS03) | G1<br>(SV-<br>PBS) | G2<br>(SV-<br>AS03) | G2<br>(SV-<br>PBS) | V1<br>(SV-<br>AS03) | V1<br>(SV-<br>PBS) | V2<br>(SV-<br>AS03) | V2<br>(SV-<br>PBS) | V1+V2<br>(SV-<br>AS03) | V1+V2<br>(SV-<br>PBS) |
|-----------------|---------------|---------------------|--------------------|---------------------|--------------------|---------------------|--------------------|---------------------|--------------------|------------------------|-----------------------|
| ENSG00000177575 | CD163         |                     | -0.57              |                     | 0.63               |                     | 32.3               |                     | 39.4               |                        | 71.7                  |
| ENSG00000105366 | SIGLEC8       |                     | -0.84              |                     | -0.01              |                     | 71.3               |                     | 0.0                |                        | 71.3                  |
| ENSG00000188536 | HBA2          |                     | -0.37              |                     | 0.68               |                     | 13.9               |                     | 46.6               |                        | 60.5                  |
| ENSG00000112759 | SLC29A1       |                     | -0.76              |                     | -0.06              |                     | 57.3               |                     | 0.3                |                        | 57.6                  |
| ENSG00000206172 | HBA1          |                     | -0.11              |                     | 0.74               |                     | 1.3                |                     | 54.3               |                        | 55.5                  |
| ENSG00000244734 | HBB           |                     | -0.17              |                     | 0.68               |                     | 3.0                |                     | 46.8               |                        | 49.8                  |
| ENSG00000183134 | GPR44         |                     | -0.68              |                     | 0.07               |                     | 46.0               |                     | 0.5                |                        | 46.5                  |
| ENSG00000110651 | CD81          |                     | -0.57              |                     | 0.21               |                     | 33.0               |                     | 4.5                |                        | 37.5                  |
| ENSG00000211895 | IGHA1         |                     | -0.36              |                     | 0.44               |                     | 12.7               |                     | 19.7               |                        | 32.4                  |
| ENSG00000103355 | PRSS33        |                     | -0.57              |                     | -0.04              |                     | 32.0               |                     | 0.1                |                        | 32.1                  |
| ENSG00000105369 | CD79A         |                     | -0.28              |                     | 0.48               |                     | 8.0                |                     | 22.6               |                        | 30.6                  |
| ENSG00000038427 | VCAN          |                     | -0.52              |                     | 0.10               |                     | 27.4               |                     | 1.0                |                        | 28.4                  |
| ENSG00000163534 | FCRL1         |                     | -0.20              |                     | 0.49               |                     | 3.9                |                     | 24.3               |                        | 28.3                  |
| ENSG00000089169 | RPH3A         |                     | -0.35              |                     | 0.39               |                     | 12.1               |                     | 15.0               |                        | 27.1                  |
| ENSG00000196576 | PLXNB2        |                     | -0.41              |                     | 0.30               |                     | 16.5               |                     | 9.1                |                        | 25.6                  |
| ENSG00000107551 | RASSF4        |                     | -0.36              |                     | 0.35               |                     | 13.2               |                     | 12.4               |                        | 25.6                  |
| ENSG00000136573 | BLK           |                     | -0.38              |                     | 0.31               |                     | 14.7               |                     | 9.4                |                        | 24.1                  |
| ENSG00000123384 | LRP1          |                     | -0.47              |                     | 0.12               |                     | 22.0               |                     | 1.5                |                        | 23.6                  |
| ENSG00000089127 | OAS1          |                     | 0.38               |                     | -0.26              |                     | 14.6               |                     | 6.5                |                        | 21.1                  |
| ENSG00000172967 | XKR3          |                     | 0.08               |                     | 0.45               |                     | 0.6                |                     | 20.2               |                        | 20.8                  |
| ENSG00000140968 | IRF8          |                     | -0.35              |                     | 0.28               |                     | 12.4               |                     | 8.0                |                        | 20.4                  |
| ENSG00000012124 | CD22          |                     | -0.34              |                     | 0.29               |                     | 11.5               |                     | 8.4                |                        | 19.9                  |
| ENSG00000153064 | BANK1         |                     | -0.35              |                     | 0.26               |                     | 12.0               |                     | 6.8                |                        | 18.8                  |
| ENSG00000135218 | CD36          |                     | -0.41              |                     | 0.13               |                     | 16.5               |                     | 1.6                |                        | 18.1                  |
| ENSG00000223946 | RP11-533O20.2 |                     | 0.32               |                     | 0.26               |                     | 10.1               |                     | 6.9                |                        | 17.1                  |
| ENSG00000124942 | AHNAK         |                     | -0.40              |                     | 0.08               |                     | 15.7               |                     | 0.6                |                        | 16.2                  |
| ENSG00000211898 | IGHD          |                     | -0.29              |                     | 0.26               |                     | 8.2                |                     | 6.9                |                        | 15.1                  |
| ENSG00000196092 | PAX5          |                     | -0.38              |                     | -0.04              |                     | 14.3               |                     | 0.2                |                        | 14.5                  |
| ENSG00000010327 | STAB1         |                     | -0.33              |                     | 0.17               |                     | 10.9               |                     | 2.8                |                        | 13.7                  |
| ENSG00000234571 | RP5-998N21.4  |                     | -0.30              |                     | 0.19               |                     | 9.1                |                     | 3.7                |                        | 12.8                  |

| Gene ID         | Gene Name  | G1<br>(SV-<br>AS03) | G1<br>(SV-<br>PBS) | G2<br>(SV-<br>AS03) | G2<br>(SV-<br>PBS) | V1<br>(SV-<br>AS03) | V1<br>(SV-<br>PBS) | V2<br>(SV-<br>AS03) | V2<br>(SV-<br>PBS) | V1+V2<br>(SV-<br>AS03) | V1+V2<br>(SV-<br>PBS) |
|-----------------|------------|---------------------|--------------------|---------------------|--------------------|---------------------|--------------------|---------------------|--------------------|------------------------|-----------------------|
| ENSG00000247982 | AC016525.1 |                     | -0.33              |                     | 0.13               |                     | 11.0               |                     | 1.7                |                        | 12.7                  |
| ENSG00000204345 | CD300LD    |                     | -0.11              |                     | 0.31               |                     | 1.1                |                     | 9.8                |                        | 10.9                  |
| ENSG00000186407 | CD300E     |                     | -0.22              |                     | 0.24               |                     | 4.9                |                     | 5.9                |                        | 10.8                  |
| ENSG00000004799 | PDK4       |                     | 0.32               |                     | 0.06               |                     | 10.4               |                     | 0.4                |                        | 10.7                  |
| ENSG00000156738 | MS4A1      |                     | -0.27              |                     | 0.17               |                     | 7.5                |                     | 2.7                |                        | 10.2                  |
| ENSG00000231389 | HLA-DPA1   |                     | -0.26              |                     | 0.05               |                     | 6.9                |                     | 0.3                |                        | 7.2                   |
| ENSG00000211899 | IGHM       |                     | -0.25              |                     | 0.06               |                     | 6.1                |                     | 0.3                |                        | 6.4                   |
| ENSG00000211896 | IGHG1      |                     | 0.12               |                     | 0.10               |                     | 1.5                |                     | 1.0                |                        | 2.5                   |
| ENSG00000124772 | CPNE5      |                     | 0.05               |                     | 0.04               |                     | 0.2                |                     | 0.1                |                        | 0.4                   |

**Table A140:** Canonical loadings and explained variance (RNA-Seq, Neutrophils, Day 7, Gene variables). Gene variables with at least 25% of explained variance for the first two canonical variates are listed. GX: canonical loadings for canonical variate X, VX: % explained variance for canonical variate X, V1+V2: total % explained variance for both canonical variates. Values for CCA results with a poor cross validation score (< 0.70) are left blank. Sorted by maximum explained variance across treatments (V1+V2).

| IMO Vari-<br>able | IMO Variable Name                   | I1<br>(SV-<br>AS03) | I1<br>(SV-<br>PBS) | I2<br>(SV-<br>AS03) | I2<br>(SV-<br>PBS) | V1<br>(SV-<br>AS03) | V1<br>(SV-<br>PBS) | V2<br>(SV-<br>AS03) | V2<br>(SV-<br>PBS) | V1+V2<br>(SV-<br>AS03) | V1+V2<br>(SV-<br>PBS) |
|-------------------|-------------------------------------|---------------------|--------------------|---------------------|--------------------|---------------------|--------------------|---------------------|--------------------|------------------------|-----------------------|
| MIP-1 $\alpha$    | Macrophage inflammatory protein     |                     | 0.91               |                     | 0.24               |                     | 81.9               |                     | 5.9                |                        | 87.8                  |
| IP-10             | Interferon gamma-induced protein 10 |                     | 0.92               |                     | 0.19               |                     | 83.8               |                     | 3.7                |                        | 87.5                  |
| MCP-1             | Monocyte chemoattractant protein-1  |                     | 0.74               |                     | 0.52               |                     | 55.2               |                     | 26.7               |                        | 81.8                  |
| TNF               | Tumor necrosis factors              |                     | -0.36              |                     | 0.78               |                     | 12.8               |                     | 61.1               |                        | 73.9                  |
| IL-1 $\beta$      | Interleukin-1 beta                  |                     | -0.73              |                     | -0.36              |                     | 52.6               |                     | 12.7               |                        | 65.4                  |
| Eotaxin-1         | Eotaxin-1                           |                     | -0.73              |                     | 0.21               |                     | 52.6               |                     | 4.4                |                        | 57.0                  |
| IL-12p70          | Interleukin-12 p70                  |                     | -0.60              |                     | -0.09              |                     | 35.5               |                     | 0.9                |                        | 36.4                  |
| Nt                | Microneutralization inhibition      |                     | 0.54               |                     | -0.08              |                     | 29.6               |                     | 0.6                |                        | 30.2                  |
| IL-6              | Interleukin-6                       |                     | -0.28              |                     | -0.46              |                     | 7.9                |                     | 21.0               |                        | 29.0                  |
| IFN- $\gamma$     | Interferon gamma                    |                     | -0.24              |                     | -0.48              |                     | 5.8                |                     | 22.8               |                        | 28.6                  |
| IL-10             | Interleukin-10                      |                     | -0.16              |                     | 0.11               |                     | 2.7                |                     | 1.3                |                        | 3.9                   |
| RANTES            | Chemokine (C-C motif) ligand 5      |                     | 0.02               |                     | 0.13               |                     | 0.0                |                     | 1.7                |                        | 1.8                   |
| IL-8              | Interleukin-8                       |                     | 0.08               |                     | 0.03               |                     | 0.7                |                     | 0.1                |                        | 0.8                   |

**Table A141:** Canonical loadings and explained variance (RNA-Seq, Neutrophils, Day 7, IMO variables). IMO variables with at least 25% of explained variance for the first two canonical variates are listed. GX: canonical loadings for canonical variate X, VX: % explained variance for canonical variate X, V1+V2: total % explained variance for both canonical variates. Values for CCA results with a poor cross validation score (< 0.70) are left blank. Sorted by maximum explained variance across treatments (V1+V2).

| Gene ID         | Gene Name | G1<br>(SV-<br>AS03) | G1<br>(SV-<br>PBS) | G2<br>(SV-<br>AS03) | G2<br>(SV-<br>PBS) | V1<br>(SV-<br>AS03) | V1<br>(SV-<br>PBS) | V2<br>(SV-<br>AS03) | V2<br>(SV-<br>PBS) | V1+V2<br>(SV-<br>AS03) | V1+V2<br>(SV-<br>PBS) |
|-----------------|-----------|---------------------|--------------------|---------------------|--------------------|---------------------|--------------------|---------------------|--------------------|------------------------|-----------------------|
| ENSG00000104738 | MCM4      | 0.83                | -0.27              | 0.42                | 0.17               | 69.3                | 7.3                | 17.9                | 2.9                | 87.2                   | 10.3                  |
| ENSG00000244694 | C6orf138  | 0.86                | 0.10               | -0.28               | -0.62              | 73.4                | 1.0                | 7.6                 | 38.6               | 81.0                   | 39.6                  |
| ENSG00000204705 | UBTF5     | 0.68                | 0.14               | 0.55                | -0.44              | 45.7                | 2.0                | 30.3                | 19.5               | 76.0                   | 21.5                  |
| ENSG00000012124 | CD22      | 0.46                | 0.74               | 0.17                | -0.41              | 21.0                | 55.2               | 2.8                 | 16.5               | 23.8                   | 71.7                  |
| ENSG00000004799 | PDK4      | 0.71                | 0.07               | -0.03               | 0.83               | 51.0                | 0.4                | 0.1                 | 69.2               | 51.1                   | 69.7                  |
| ENSG00000204655 | MOG       | 0.47                | 0.07               | 0.68                | -0.64              | 22.4                | 0.4                | 46.0                | 40.9               | 68.4                   | 41.4                  |
| ENSG00000175592 | FOSL1     | 0.77                | -0.39              | 0.21                | 0.31               | 59.8                | 15.2               | 4.5                 | 9.4                | 64.3                   | 24.6                  |
| ENSG00000110651 | CD81      | 0.39                | 0.37               | -0.68               | 0.38               | 15.5                | 13.3               | 46.3                | 14.5               | 61.9                   | 27.9                  |

| Gene ID         | Gene Name      | G1<br>(SV-<br>AS03) | G1<br>(SV-<br>PBS) | G2<br>(SV-<br>AS03) | G2<br>(SV-<br>PBS) | V1<br>(SV-<br>AS03) | V1<br>(SV-<br>PBS) | V2<br>(SV-<br>AS03) | V2<br>(SV-<br>PBS) | V1+V2<br>(SV-<br>AS03) | V1+V2<br>(SV-<br>PBS) |
|-----------------|----------------|---------------------|--------------------|---------------------|--------------------|---------------------|--------------------|---------------------|--------------------|------------------------|-----------------------|
| ENSG00000252197 | AC091047.1     | -0.77               | 0.39               | 0.07                | -0.11              | 59.6                | 15.0               | 0.5                 | 1.2                | 60.0                   | 16.2                  |
| ENSG00000252331 | AP002812.1     | -0.76               | 0.35               | 0.12                | 0.07               | 58.3                | 11.9               | 1.4                 | 0.5                | 59.7                   | 12.4                  |
| ENSG00000211899 | IGHM           | 0.36                | 0.76               | -0.00               | 0.02               | 12.9                | 57.2               | 0.0                 | 0.0                | 12.9                   | 57.2                  |
| ENSG00000119686 | AC007182.1     | -0.51               | -0.29              | -0.55               | -0.13              | 26.3                | 8.6                | 30.7                | 1.7                | 57.0                   | 10.3                  |
| ENSG00000123384 | LRP1           | -0.02               | 0.04               | 0.75                | -0.64              | 0.0                 | 0.1                | 56.4                | 40.8               | 56.5                   | 40.9                  |
| ENSG00000160932 | LY6E           | 0.00                | 0.59               | 0.21                | 0.46               | 0.0                 | 34.5               | 4.2                 | 21.2               | 4.2                    | 55.7                  |
| ENSG00000231389 | HLA-DPA1       | 0.46                | 0.35               | -0.05               | 0.66               | 21.1                | 12.0               | 0.3                 | 42.9               | 21.4                   | 55.0                  |
| ENSG00000247982 | AC016525.1     | 0.55                | 0.55               | 0.09                | -0.49              | 29.8                | 30.3               | 0.8                 | 23.7               | 30.6                   | 54.0                  |
| ENSG00000222852 | Y_RNA_222852   | -0.19               | 0.70               | -0.23               | 0.20               | 3.6                 | 49.1               | 5.2                 | 3.9                | 8.9                    | 53.1                  |
| ENSG00000164403 | SHROOM1        | -0.57               | 0.23               | -0.44               | -0.59              | 32.6                | 5.3                | 19.7                | 34.9               | 52.4                   | 40.2                  |
| ENSG00000141750 | STAC2          | -0.19               | 0.23               | 0.50                | -0.68              | 3.7                 | 5.4                | 25.4                | 46.5               | 29.1                   | 51.9                  |
| ENSG00000117632 | STMN1          | 0.71                | 0.04               | 0.11                | -0.46              | 50.3                | 0.2                | 1.3                 | 21.2               | 51.6                   | 21.4                  |
| ENSG00000146192 | FGD2           | 0.71                | 0.23               | -0.11               | 0.00               | 50.2                | 5.5                | 1.3                 | 0.0                | 51.5                   | 5.5                   |
| ENSG00000108576 | SLC6A4         | 0.70                | 0.19               | 0.11                | -0.57              | 49.0                | 3.7                | 1.3                 | 32.4               | 50.2                   | 36.2                  |
| ENSG00000251826 | AL365332.1     | -0.70               | 0.41               | -0.10               | 0.00               | 48.8                | 16.9               | 1.0                 | 0.0                | 49.8                   | 16.9                  |
| ENSG00000182310 | NCRNA00085     | 0.46                | -0.56              | -0.53               | -0.11              | 20.7                | 31.8               | 28.6                | 1.1                | 49.3                   | 32.9                  |
| ENSG00000252229 | AC098691.1     | -0.69               | 0.33               | 0.13                | 0.50               | 47.2                | 10.9               | 1.7                 | 24.6               | 48.8                   | 35.5                  |
| ENSG00000211898 | IGHD           | 0.47                | 0.66               | 0.07                | 0.20               | 22.2                | 43.8               | 0.5                 | 3.9                | 22.8                   | 47.7                  |
| ENSG00000252318 | AC097532.1     | -0.67               | 0.46               | -0.15               | -0.18              | 45.3                | 21.6               | 2.2                 | 3.2                | 47.5                   | 24.8                  |
| ENSG00000188536 | HBA2           | 0.31                | 0.60               | -0.45               | -0.34              | 9.9                 | 36.0               | 20.3                | 11.3               | 30.2                   | 47.3                  |
| ENSG00000257475 | RP11-983P16.2  | 0.50                | 0.20               | 0.44                | -0.65              | 24.8                | 4.0                | 19.8                | 42.8               | 44.6                   | 46.8                  |
| ENSG00000109919 | MTCH2          | 0.54                | -0.52              | -0.17               | 0.43               | 28.8                | 27.3               | 2.9                 | 18.5               | 31.7                   | 45.8                  |
| ENSG00000244734 | HBB            | 0.26                | 0.45               | -0.26               | -0.49              | 6.7                 | 20.7               | 6.7                 | 23.7               | 13.4                   | 44.4                  |
| ENSG00000168685 | IL7R           | 0.64                | -0.33              | -0.18               | -0.10              | 41.1                | 10.6               | 3.2                 | 1.0                | 44.4                   | 11.6                  |
| ENSG00000211895 | IGHA1          | 0.49                | 0.65               | -0.06               | -0.09              | 24.2                | 42.9               | 0.4                 | 0.7                | 24.5                   | 43.6                  |
| ENSG00000197816 | C9orf174       | 0.48                | 0.18               | 0.16                | -0.62              | 23.2                | 3.2                | 2.4                 | 38.8               | 25.6                   | 42.0                  |
| ENSG00000197928 | ZNF677         | 0.44                | 0.22               | 0.28                | -0.61              | 19.5                | 4.7                | 7.9                 | 36.9               | 27.4                   | 41.5                  |
| ENSG00000167037 | SGSM1          | 0.34                | 0.13               | 0.05                | -0.63              | 11.5                | 1.8                | 0.2                 | 39.7               | 11.7                   | 41.5                  |
| ENSG00000078114 | NEBL           | 0.61                | -0.13              | 0.19                | -0.47              | 37.6                | 1.7                | 3.6                 | 22.1               | 41.3                   | 23.7                  |
| ENSG00000206172 | HBA1           | 0.23                | 0.52               | -0.43               | -0.38              | 5.2                 | 26.6               | 18.6                | 14.6               | 23.8                   | 41.2                  |
| ENSG00000188290 | HES4           | 0.01                | -0.01              | -0.38               | 0.64               | 0.0                 | 0.0                | 14.3                | 40.9               | 14.3                   | 41.0                  |
| ENSG00000205929 | C21orf62       | 0.41                | 0.13               | -0.00               | -0.63              | 16.5                | 1.7                | 0.0                 | 39.2               | 16.5                   | 40.9                  |
| ENSG00000158286 | RNF207         | -0.25               | 0.26               | 0.39                | -0.58              | 6.3                 | 6.7                | 15.5                | 33.2               | 21.8                   | 39.9                  |
| ENSG00000223865 | HLA-DPB1       | 0.62                | 0.25               | -0.10               | 0.08               | 38.7                | 6.4                | 1.1                 | 0.7                | 39.8                   | 7.1                   |
| ENSG00000153064 | BANK1          | 0.58                | 0.02               | 0.23                | 0.55               | 34.1                | 0.0                | 5.2                 | 29.8               | 39.3                   | 29.9                  |
| ENSG00000211896 | IGHG1          | 0.59                | 0.49               | 0.19                | -0.29              | 34.4                | 23.7               | 3.6                 | 8.5                | 38.0                   | 32.2                  |
| ENSG00000171320 | ESCO2          | 0.02                | 0.16               | -0.14               | -0.59              | 0.0                 | 2.5                | 2.0                 | 35.2               | 2.1                    | 37.7                  |
| ENSG00000111335 | OAS2           | 0.25                | 0.49               | 0.49                | 0.36               | 6.1                 | 24.3               | 24.1                | 13.0               | 30.2                   | 37.3                  |
| ENSG00000172000 | ZNF556         | 0.17                | 0.26               | 0.07                | -0.55              | 2.8                 | 6.9                | 0.5                 | 29.9               | 3.3                    | 36.9                  |
| ENSG00000196208 | GREB1          | 0.48                | 0.30               | -0.24               | -0.52              | 23.4                | 9.2                | 5.9                 | 27.5               | 29.3                   | 36.7                  |
| ENSG00000038427 | VCAN           | -0.08               | -0.09              | 0.44                | -0.59              | 0.6                 | 0.7                | 19.3                | 34.4               | 19.9                   | 35.1                  |
| ENSG00000235297 | RP11-504H5.1   | -0.02               | 0.16               | 0.59                | -0.47              | 0.1                 | 2.6                | 34.3                | 22.2               | 34.4                   | 24.8                  |
| ENSG00000255478 | RP11-867O8.5   | 0.19                | 0.09               | 0.50                | -0.58              | 3.7                 | 0.8                | 24.8                | 33.5               | 28.4                   | 34.3                  |
| ENSG00000232406 | RP11-234K24.3  | -0.41               | 0.19               | 0.23                | -0.54              | 17.2                | 3.7                | 5.1                 | 29.0               | 22.3                   | 32.7                  |
| ENSG00000135702 | CHST5          | -0.01               | 0.17               | 0.46                | -0.54              | 0.0                 | 2.8                | 21.2                | 28.9               | 21.2                   | 31.7                  |
| ENSG00000134762 | DSC3           | 0.20                | 0.24               | 0.28                | -0.51              | 4.0                 | 5.8                | 7.8                 | 25.7               | 11.7                   | 31.5                  |
| ENSG00000109684 | CLNK           | -0.00               | 0.16               | 0.41                | -0.53              | 0.0                 | 2.7                | 16.8                | 28.5               | 16.8                   | 31.2                  |
| ENSG00000134321 | RSAD2          | -0.14               | 0.45               | 0.20                | 0.31               | 1.9                 | 20.5               | 3.8                 | 9.5                | 5.7                    | 30.0                  |
| ENSG00000187492 | CDHR4          | 0.01                | 0.14               | 0.47                | -0.52              | 0.0                 | 2.0                | 21.7                | 27.0               | 21.7                   | 29.0                  |
| ENSG00000111331 | OAS3           | -0.48               | 0.44               | 0.18                | 0.31               | 23.3                | 19.2               | 3.2                 | 9.5                | 26.5                   | 28.7                  |
| ENSG00000249383 | RP11-1018N14.1 | 0.19                | -0.01              | -0.22               | -0.53              | 3.7                 | 0.0                | 4.8                 | 28.0               | 8.5                    | 28.0                  |

| Gene ID         | Gene Name     | G1<br>(SV-<br>AS03) | G1<br>(SV-<br>PBS) | G2<br>(SV-<br>AS03) | G2<br>(SV-<br>PBS) | V1<br>(SV-<br>AS03) | V1<br>(SV-<br>PBS) | V2<br>(SV-<br>AS03) | V2<br>(SV-<br>PBS) | V1+V2<br>(SV-<br>AS03) | V1+V2<br>(SV-<br>PBS) |
|-----------------|---------------|---------------------|--------------------|---------------------|--------------------|---------------------|--------------------|---------------------|--------------------|------------------------|-----------------------|
| ENSG00000238272 | RP3-436N22.3  | -0.14               | 0.34               | -0.34               | -0.39              | 2.0                 | 11.4               | 11.4                | 15.1               | 13.5                   | 26.5                  |
| ENSG00000009765 | IYD           | 0.26                | 0.12               | -0.16               | -0.48              | 6.7                 | 1.4                | 2.4                 | 23.5               | 9.1                    | 24.9                  |
| ENSG00000132915 | PDE6A         | -0.00               | 0.19               | 0.25                | -0.45              | 0.0                 | 3.5                | 6.0                 | 20.6               | 6.0                    | 24.1                  |
| ENSG00000176406 | RIMS2         | -0.24               | 0.10               | -0.30               | -0.48              | 5.9                 | 1.0                | 9.0                 | 23.1               | 14.8                   | 24.1                  |
| ENSG00000123243 | ITIH5         | -0.00               | 0.18               | -0.14               | -0.45              | 0.0                 | 3.3                | 2.0                 | 19.9               | 2.0                    | 23.2                  |
| ENSG00000184979 | USP18         | 0.12                | 0.32               | -0.18               | 0.35               | 1.5                 | 10.5               | 3.1                 | 11.9               | 4.6                    | 22.5                  |
| ENSG00000140968 | IRF8          | 0.31                | 0.33               | 0.34                | 0.15               | 9.4                 | 10.8               | 11.3                | 2.2                | 20.7                   | 13.0                  |
| ENSG00000156738 | MS4A1         | 0.44                | 0.44               | 0.05                | -0.04              | 19.1                | 19.1               | 0.3                 | 0.2                | 19.4                   | 19.3                  |
| ENSG00000256745 | RP11-680H20.1 | -0.19               | -0.05              | 0.05                | -0.43              | 3.6                 | 0.2                | 0.3                 | 18.4               | 3.9                    | 18.6                  |
| ENSG00000078081 | LAMP3         | 0.05                | 0.28               | -0.40               | 0.31               | 0.2                 | 8.0                | 15.9                | 9.7                | 16.2                   | 17.6                  |
| ENSG00000118432 | CNR1          | 0.39                | -0.23              | -0.12               | -0.21              | 15.0                | 5.3                | 1.4                 | 4.3                | 16.4                   | 9.5                   |
| ENSG00000136573 | BLK           | 0.37                | 0.17               | 0.03                | 0.07               | 13.9                | 2.9                | 0.1                 | 0.4                | 14.0                   | 3.3                   |
| ENSG00000196092 | PAX5          | 0.27                | 0.15               | -0.24               | 0.02               | 7.5                 | 2.2                | 6.0                 | 0.0                | 13.5                   | 2.3                   |
| ENSG00000090104 | RGS1          | 0.34                | 0.13               | -0.07               | 0.24               | 11.9                | 1.8                | 0.5                 | 5.6                | 12.3                   | 7.4                   |

**Table A142:** Canonical loadings and explained variance (RNA-Seq, Neutrophils, Day 28, Gene variables). Gene variables with at least 25% of explained variance for the first two canonical variates are listed. GX: canonical loadings for canonical variate X, VX: % explained variance for canonical variate X, V1+V2: total % explained variance for both canonical variates. Values for CCA results with a poor cross validation score (< 0.70) are left blank. Sorted by maximum explained variance across treatments (V1+V2).

| IMO Vari-<br>able | IMO Variable Name                   | I1<br>(SV-<br>AS03) | I1<br>(SV-<br>PBS) | I2<br>(SV-<br>AS03) | I2<br>(SV-<br>PBS) | V1<br>(SV-<br>AS03) | V1<br>(SV-<br>PBS) | V2<br>(SV-<br>AS03) | V2<br>(SV-<br>PBS) | V1+V2<br>(SV-<br>AS03) | V1+V2<br>(SV-<br>PBS) |
|-------------------|-------------------------------------|---------------------|--------------------|---------------------|--------------------|---------------------|--------------------|---------------------|--------------------|------------------------|-----------------------|
| IL-12p70          | Interleukin-12 p70                  | 0.95                | 0.52               | 0.24                | 0.56               | 90.8                | 27.4               | 5.9                 | 31.7               | 96.7                   | 59.2                  |
| IL-10             | Interleukin-10                      | 0.27                | 0.10               | 0.91                | -0.32              | 7.4                 | 0.9                | 83.6                | 10.1               | 91.0                   | 11.0                  |
| Nt                | Microneutralization inhibition      | -0.78               | 0.20               | 0.50                | 0.34               | 60.3                | 4.1                | 25.3                | 11.5               | 85.6                   | 15.6                  |
| HAI               | Hemagglutination inhibition         | -0.68               | -0.17              | 0.58                | 0.60               | 46.8                | 3.1                | 33.6                | 35.5               | 80.4                   | 38.6                  |
| IL-8              | Interleukin-8                       | 0.40                | 0.89               | 0.64                | -0.02              | 15.9                | 78.8               | 41.3                | 0.1                | 57.2                   | 78.8                  |
| IL-6              | Interleukin-6                       | 0.83                | -0.07              | -0.18               | -0.04              | 68.4                | 0.6                | 3.3                 | 0.2                | 71.7                   | 0.7                   |
| MIP-1 $\alpha$    | Macrophage inflammatory protein     | 0.13                | 0.71               | -0.38               | -0.41              | 1.7                 | 49.7               | 14.8                | 16.8               | 16.4                   | 66.5                  |
| Eotaxin-1         | Eotaxin-1                           | 0.20                | 0.22               | 0.78                | -0.28              | 4.0                 | 4.8                | 61.0                | 8.1                | 65.0                   | 12.8                  |
| IP-10             | Interferon gamma-induced protein 10 | -0.57               | 0.40               | 0.52                | -0.57              | 32.7                | 16.1               | 26.8                | 32.6               | 59.5                   | 48.7                  |
| TNF               | Tumor necrosis factors              | 0.44                | 0.10               | 0.52                | -0.42              | 19.0                | 1.1                | 27.3                | 17.5               | 46.3                   | 18.5                  |
| IL-1 $\beta$      | Interleukin-1 beta                  | 0.37                | 0.19               | 0.52                | -0.34              | 13.9                | 3.7                | 27.2                | 11.5               | 41.1                   | 15.2                  |
| RANTES            | Chemokine (C-C motif) ligand 5      | 0.35                | 0.09               | 0.47                | -0.28              | 12.5                | 0.7                | 21.8                | 8.0                | 34.3                   | 8.8                   |
| MCP-1             | Monocyte chemoattractant protein-1  | 0.51                | 0.01               | 0.20                | -0.51              | 25.8                | 0.0                | 4.1                 | 25.8               | 29.9                   | 25.8                  |
| IFN- $\gamma$     | Interferon gamma                    | -0.26               | 0.15               | 0.40                | -0.02              | 6.9                 | 2.2                | 16.2                | 0.0                | 23.2                   | 2.3                   |

**Table A143:** Canonical loadings and explained variance (RNA-Seq, Neutrophils, Day 28, IMO variables). IMO variables with at least 25% of explained variance for the first two canonical variates are listed. GX: canonical loadings for canonical variate X, VX: % explained variance for canonical variate X, V1+V2: total % explained variance for both canonical variates. Values for CCA results with a poor cross validation score (< 0.70) are left blank. Sorted by maximum explained variance across treatments (V1+V2).

| Gene ID         | Gene Name | G1<br>(SV-<br>AS03) | G1<br>(SV-<br>PBS) | G2<br>(SV-<br>AS03) | G2<br>(SV-<br>PBS) | V1<br>(SV-<br>AS03) | V1<br>(SV-<br>PBS) | V2<br>(SV-<br>AS03) | V2<br>(SV-<br>PBS) | V1+V2<br>(SV-<br>AS03) | V1+V2<br>(SV-<br>PBS) |
|-----------------|-----------|---------------------|--------------------|---------------------|--------------------|---------------------|--------------------|---------------------|--------------------|------------------------|-----------------------|
| ENSG00000106565 | TMEM176B  | 0.97                |                    | 0.03                |                    | 94.8                |                    | 0.1                 |                    | 94.9                   |                       |
| ENSG00000204103 | MAFB      | 0.96                |                    | -0.15               |                    | 91.4                |                    | 2.2                 |                    | 93.5                   |                       |

| Gene ID         | Gene Name     | G1<br>(SV-<br>AS03) | G1<br>(SV-<br>PBS) | G2<br>(SV-<br>AS03) | G2<br>(SV-<br>PBS) | V1<br>(SV-<br>AS03) | V1<br>(SV-<br>PBS) | V2<br>(SV-<br>AS03) | V2<br>(SV-<br>PBS) | V1+V2<br>(SV-<br>AS03) | V1+V2<br>(SV-<br>PBS) |
|-----------------|---------------|---------------------|--------------------|---------------------|--------------------|---------------------|--------------------|---------------------|--------------------|------------------------|-----------------------|
| ENSG00000170458 | CD14          | 0.96                |                    | -0.08               |                    | 92.3                |                    | 0.6                 |                    | 92.9                   |                       |
| ENSG00000182022 | CHST15        | 0.95                |                    | -0.17               |                    | 89.9                |                    | 2.9                 |                    | 92.7                   |                       |
| ENSG00000163221 | S100A12       | 0.87                |                    | -0.40               |                    | 75.3                |                    | 15.8                |                    | 91.1                   |                       |
| ENSG00000104783 | KCNN4         | 0.88                |                    | 0.33                |                    | 78.2                |                    | 11.1                |                    | 89.3                   |                       |
| ENSG00000172243 | CLEC7A        | 0.94                |                    | -0.03               |                    | 88.7                |                    | 0.1                 |                    | 88.8                   |                       |
| ENSG00000105967 | TFEC          | 0.93                |                    | 0.03                |                    | 87.2                |                    | 0.1                 |                    | 87.3                   |                       |
| ENSG00000155465 | SLC7A7        | 0.91                |                    | -0.20               |                    | 83.1                |                    | 4.0                 |                    | 87.1                   |                       |
| ENSG00000116701 | NCF2          | 0.91                |                    | 0.08                |                    | 82.7                |                    | 0.6                 |                    | 83.3                   |                       |
| ENSG00000074964 | ARHGEF10L     | 0.91                |                    | 0.00                |                    | 83.0                |                    | 0.0                 |                    | 83.0                   |                       |
| ENSG00000181631 | P2RY13        | 0.77                |                    | -0.49               |                    | 58.6                |                    | 24.3                |                    | 82.9                   |                       |
| ENSG00000163563 | MNDA          | 0.91                |                    | 0.05                |                    | 82.7                |                    | 0.2                 |                    | 82.9                   |                       |
| ENSG00000121316 | PLBD1         | 0.90                |                    | -0.04               |                    | 81.3                |                    | 0.1                 |                    | 81.4                   |                       |
| ENSG00000135218 | CD36          | 0.88                |                    | 0.20                |                    | 76.6                |                    | 4.0                 |                    | 80.5                   |                       |
| ENSG00000038427 | VCAN          | 0.86                |                    | 0.27                |                    | 73.2                |                    | 7.1                 |                    | 80.3                   |                       |
| ENSG00000178965 | C1orf173      | -0.74               |                    | -0.49               |                    | 55.4                |                    | 24.0                |                    | 79.3                   |                       |
| ENSG00000186407 | CD300E        | 0.85                |                    | 0.26                |                    | 72.3                |                    | 6.8                 |                    | 79.2                   |                       |
| ENSG00000140511 | HAPLN3        | -0.55               |                    | -0.70               |                    | 30.0                |                    | 48.5                |                    | 78.5                   |                       |
| ENSG00000153823 | PID1          | 0.80                |                    | 0.37                |                    | 64.4                |                    | 14.0                |                    | 78.4                   |                       |
| ENSG00000198053 | SIRPA         | 0.88                |                    | 0.12                |                    | 76.8                |                    | 1.3                 |                    | 78.2                   |                       |
| ENSG00000085265 | FCN1          | 0.80                |                    | 0.38                |                    | 63.4                |                    | 14.4                |                    | 77.8                   |                       |
| ENSG00000235568 | NFAM1         | 0.88                |                    | 0.03                |                    | 77.6                |                    | 0.1                 |                    | 77.8                   |                       |
| ENSG00000187554 | TLR5          | 0.78                |                    | -0.41               |                    | 60.2                |                    | 17.0                |                    | 77.2                   |                       |
| ENSG00000204472 | AIF1          | 0.87                |                    | 0.13                |                    | 75.3                |                    | 1.8                 |                    | 77.1                   |                       |
| ENSG00000090382 | LYZ           | 0.86                |                    | 0.17                |                    | 74.3                |                    | 2.8                 |                    | 77.1                   |                       |
| ENSG00000119535 | CSF3R         | 0.86                |                    | 0.16                |                    | 74.1                |                    | 2.6                 |                    | 76.7                   |                       |
| ENSG00000161944 | ASGR2         | 0.65                |                    | 0.58                |                    | 42.2                |                    | 34.1                |                    | 76.3                   |                       |
| ENSG00000156587 | UBE2L6        | -0.65               |                    | -0.58               |                    | 42.8                |                    | 33.2                |                    | 76.0                   |                       |
| ENSG00000106066 | CPVL          | 0.56                |                    | 0.66                |                    | 31.7                |                    | 44.0                |                    | 75.7                   |                       |
| ENSG00000224397 | RP11-290F20.3 | 0.75                |                    | -0.44               |                    | 56.1                |                    | 19.7                |                    | 75.7                   |                       |
| ENSG00000123384 | LRP1          | 0.87                |                    | 0.03                |                    | 75.4                |                    | 0.1                 |                    | 75.5                   |                       |
| ENSG00000186074 | CD300LF       | 0.86                |                    | 0.05                |                    | 73.9                |                    | 0.2                 |                    | 74.1                   |                       |
| ENSG00000182578 | CSF1R         | 0.84                |                    | 0.16                |                    | 71.0                |                    | 2.6                 |                    | 73.6                   |                       |
| ENSG00000119917 | IFIT3         | -0.67               |                    | -0.53               |                    | 45.3                |                    | 27.8                |                    | 73.1                   |                       |
| ENSG00000010327 | STAB1         | 0.85                |                    | 0.06                |                    | 72.5                |                    | 0.4                 |                    | 73.0                   |                       |
| ENSG00000169385 | RNASE2        | 0.70                |                    | 0.49                |                    | 48.6                |                    | 24.2                |                    | 72.8                   |                       |
| ENSG00000188906 | LRRK2         | 0.81                |                    | 0.22                |                    | 66.4                |                    | 4.8                 |                    | 71.2                   |                       |
| ENSG00000110077 | MS4A6A        | 0.76                |                    | 0.36                |                    | 58.3                |                    | 12.7                |                    | 71.1                   |                       |
| ENSG00000187116 | LILRA5        | 0.82                |                    | -0.18               |                    | 66.7                |                    | 3.4                 |                    | 70.0                   |                       |
| ENSG00000053918 | KCNQ1         | 0.81                |                    | 0.18                |                    | 66.3                |                    | 3.1                 |                    | 69.4                   |                       |
| ENSG00000139970 | RTN1          | 0.76                |                    | 0.32                |                    | 57.8                |                    | 10.1                |                    | 67.8                   |                       |
| ENSG00000137959 | IFI44L        | -0.61               |                    | -0.54               |                    | 37.7                |                    | 29.1                |                    | 66.9                   |                       |
| ENSG00000117228 | GBP1          | -0.64               |                    | -0.51               |                    | 40.7                |                    | 26.0                |                    | 66.7                   |                       |
| ENSG00000138496 | PARP9         | -0.64               |                    | -0.51               |                    | 40.7                |                    | 25.8                |                    | 66.5                   |                       |
| ENSG00000177575 | CD163         | 0.79                |                    | 0.18                |                    | 63.1                |                    | 3.3                 |                    | 66.4                   |                       |
| ENSG00000185215 | TNFAIP2       | 0.80                |                    | 0.16                |                    | 63.9                |                    | 2.4                 |                    | 66.3                   |                       |
| ENSG00000116962 | NID1          | 0.81                |                    | 0.05                |                    | 66.0                |                    | 0.2                 |                    | 66.2                   |                       |
| ENSG00000171051 | FPR1          | 0.70                |                    | 0.40                |                    | 49.4                |                    | 15.7                |                    | 65.1                   |                       |
| ENSG00000158481 | CD1C          | 0.78                |                    | 0.19                |                    | 61.4                |                    | 3.7                 |                    | 65.0                   |                       |
| ENSG00000183023 | SLC8A1        | 0.80                |                    | 0.06                |                    | 64.4                |                    | 0.3                 |                    | 64.7                   |                       |
| ENSG00000146592 | CREB5         | 0.78                |                    | 0.20                |                    | 60.3                |                    | 3.9                 |                    | 64.2                   |                       |
| ENSG00000117115 | PADI2         | 0.78                |                    | -0.13               |                    | 61.3                |                    | 1.7                 |                    | 63.0                   |                       |

| Gene ID         | Gene Name      | G1<br>(SV-<br>AS03) | G1<br>(SV-<br>PBS) | G2<br>(SV-<br>AS03) | G2<br>(SV-<br>PBS) | V1<br>(SV-<br>AS03) | V1<br>(SV-<br>PBS) | V2<br>(SV-<br>AS03) | V2<br>(SV-<br>PBS) | V1+V2<br>(SV-<br>AS03) | V1+V2<br>(SV-<br>PBS) |
|-----------------|----------------|---------------------|--------------------|---------------------|--------------------|---------------------|--------------------|---------------------|--------------------|------------------------|-----------------------|
| ENSG00000100079 | LGALS2         | 0.70                |                    | 0.38                |                    | 48.6                |                    | 14.1                |                    | 62.8                   |                       |
| ENSG00000196209 | SIRPB2         | 0.75                |                    | 0.26                |                    | 55.6                |                    | 7.0                 |                    | 62.7                   |                       |
| ENSG00000111331 | OAS3           | -0.50               |                    | -0.61               |                    | 25.2                |                    | 36.8                |                    | 61.9                   |                       |
| ENSG00000255197 | RP11-750H9.5   | 0.75                |                    | 0.17                |                    | 56.9                |                    | 2.8                 |                    | 59.6                   |                       |
| ENSG00000167600 | CYP2S1         | 0.67                |                    | 0.37                |                    | 44.8                |                    | 13.9                |                    | 58.7                   |                       |
| ENSG00000214872 | SMTNL1         | -0.55               |                    | -0.52               |                    | 30.2                |                    | 26.7                |                    | 56.9                   |                       |
| ENSG00000243836 | RP4-555L14.5   | 0.06                |                    | 0.75                |                    | 0.3                 |                    | 56.3                |                    | 56.7                   |                       |
| ENSG00000132694 | ARHGEF11       | 0.75                |                    | 0.05                |                    | 56.4                |                    | 0.2                 |                    | 56.6                   |                       |
| ENSG00000010030 | ETV7           | -0.63               |                    | -0.40               |                    | 40.1                |                    | 15.7                |                    | 55.8                   |                       |
| ENSG00000123358 | NR4A1          | 0.74                |                    | -0.09               |                    | 54.7                |                    | 0.9                 |                    | 55.6                   |                       |
| ENSG00000115415 | STAT1          | -0.53               |                    | -0.52               |                    | 28.5                |                    | 27.0                |                    | 55.5                   |                       |
| ENSG00000164684 | ZNF704         | 0.67                |                    | 0.31                |                    | 44.6                |                    | 9.4                 |                    | 54.0                   |                       |
| ENSG00000163625 | WDFY3          | 0.67                |                    | 0.29                |                    | 45.5                |                    | 8.2                 |                    | 53.7                   |                       |
| ENSG00000114013 | CD86           | 0.60                |                    | 0.42                |                    | 35.7                |                    | 17.8                |                    | 53.6                   |                       |
| ENSG00000004799 | PDK4           | 0.42                |                    | -0.59               |                    | 17.8                |                    | 35.2                |                    | 53.0                   |                       |
| ENSG00000125347 | IRF1           | -0.58               |                    | -0.40               |                    | 34.2                |                    | 16.3                |                    | 50.5                   |                       |
| ENSG00000109743 | BST1           | 0.60                |                    | 0.38                |                    | 35.8                |                    | 14.4                |                    | 50.2                   |                       |
| ENSG00000025708 | TYMP           | -0.16               |                    | -0.69               |                    | 2.6                 |                    | 47.2                |                    | 49.8                   |                       |
| ENSG00000196497 | IPO4           | -0.55               |                    | -0.44               |                    | 30.2                |                    | 19.6                |                    | 49.8                   |                       |
| ENSG00000164125 | FAM198B        | 0.69                |                    | 0.14                |                    | 47.6                |                    | 1.8                 |                    | 49.5                   |                       |
| ENSG00000121552 | CSTA           | 0.52                |                    | 0.46                |                    | 26.6                |                    | 21.4                |                    | 48.0                   |                       |
| ENSG00000133106 | EPST11         | -0.58               |                    | -0.34               |                    | 33.1                |                    | 11.7                |                    | 44.8                   |                       |
| ENSG00000158473 | CD1D           | 0.57                |                    | 0.36                |                    | 32.2                |                    | 12.6                |                    | 44.8                   |                       |
| ENSG00000213928 | IRF9           | -0.58               |                    | -0.33               |                    | 33.4                |                    | 10.8                |                    | 44.2                   |                       |
| ENSG00000087237 | CETP           | -0.45               |                    | -0.47               |                    | 20.6                |                    | 22.3                |                    | 42.9                   |                       |
| ENSG00000105501 | SIGLEC5        | 0.49                |                    | 0.42                |                    | 24.0                |                    | 17.4                |                    | 41.5                   |                       |
| ENSG00000184371 | CSF1           | -0.58               |                    | -0.14               |                    | 33.2                |                    | 1.9                 |                    | 35.1                   |                       |
| ENSG00000140044 | JDP2           | 0.49                |                    | 0.31                |                    | 24.2                |                    | 9.9                 |                    | 34.0                   |                       |
| ENSG00000105205 | CLC            | 0.35                |                    | 0.45                |                    | 12.2                |                    | 20.6                |                    | 32.7                   |                       |
| ENSG00000168913 | ENHO           | 0.38                |                    | 0.43                |                    | 14.1                |                    | 18.2                |                    | 32.3                   |                       |
| ENSG00000082438 | COBLL1         | -0.14               |                    | 0.55                |                    | 1.8                 |                    | 29.9                |                    | 31.7                   |                       |
| ENSG00000184811 | TUSC5          | -0.55               |                    | -0.12               |                    | 30.2                |                    | 1.5                 |                    | 31.7                   |                       |
| ENSG00000164023 | SGMS2          | 0.38                |                    | 0.42                |                    | 14.1                |                    | 17.5                |                    | 31.6                   |                       |
| ENSG00000140287 | HDC            | 0.13                |                    | 0.54                |                    | 1.6                 |                    | 29.6                |                    | 31.2                   |                       |
| ENSG00000157240 | FZD1           | 0.34                |                    | 0.42                |                    | 11.8                |                    | 17.9                |                    | 29.7                   |                       |
| ENSG00000163534 | FCRL1          | -0.51               |                    | -0.12               |                    | 26.4                |                    | 1.5                 |                    | 27.9                   |                       |
| ENSG00000177989 | ODF3B          | -0.13               |                    | -0.51               |                    | 1.6                 |                    | 26.0                |                    | 27.6                   |                       |
| ENSG00000114737 | CISH           | -0.19               |                    | -0.47               |                    | 3.4                 |                    | 21.9                |                    | 25.3                   |                       |
| ENSG00000125462 | C1orf61        | -0.45               |                    | -0.21               |                    | 20.1                |                    | 4.6                 |                    | 24.7                   |                       |
| ENSG00000151650 | VENTX          | 0.44                |                    | 0.19                |                    | 19.8                |                    | 3.6                 |                    | 23.4                   |                       |
| ENSG00000104044 | OCA2           | 0.03                |                    | 0.48                |                    | 0.1                 |                    | 23.3                |                    | 23.4                   |                       |
| ENSG00000139132 | FGD4           | 0.46                |                    | 0.13                |                    | 21.0                |                    | 1.6                 |                    | 22.6                   |                       |
| ENSG00000123094 | RASSF8         | -0.34               |                    | 0.30                |                    | 11.4                |                    | 9.2                 |                    | 20.6                   |                       |
| ENSG00000166927 | MS4A7          | 0.42                |                    | -0.13               |                    | 17.9                |                    | 1.7                 |                    | 19.5                   |                       |
| ENSG00000211899 | IGHM           | 0.13                |                    | 0.42                |                    | 1.6                 |                    | 17.7                |                    | 19.3                   |                       |
| ENSG00000170476 | RP11-1280I22.1 | -0.39               |                    | -0.11               |                    | 15.4                |                    | 1.3                 |                    | 16.7                   |                       |
| ENSG00000183625 | CCR3           | 0.32                |                    | -0.22               |                    | 10.0                |                    | 4.7                 |                    | 14.7                   |                       |
| ENSG00000141096 | DPEP3          | 0.12                |                    | 0.35                |                    | 1.3                 |                    | 12.3                |                    | 13.7                   |                       |
| ENSG00000172037 | LAMB2          | 0.19                |                    | 0.31                |                    | 3.5                 |                    | 9.8                 |                    | 13.4                   |                       |
| ENSG00000144369 | FAM171B        | 0.05                |                    | -0.36               |                    | 0.3                 |                    | 12.9                |                    | 13.2                   |                       |
| ENSG00000179348 | GATA2          | 0.08                |                    | 0.34                |                    | 0.7                 |                    | 11.6                |                    | 12.2                   |                       |

| Gene ID         | Gene Name    | G1<br>(SV-<br>AS03) | G1<br>(SV-<br>PBS) | G2<br>(SV-<br>AS03) | G2<br>(SV-<br>PBS) | V1<br>(SV-<br>AS03) | V1<br>(SV-<br>PBS) | V2<br>(SV-<br>AS03) | V2<br>(SV-<br>PBS) | V1+V2<br>(SV-<br>AS03) | V1+V2<br>(SV-<br>PBS) |
|-----------------|--------------|---------------------|--------------------|---------------------|--------------------|---------------------|--------------------|---------------------|--------------------|------------------------|-----------------------|
| ENSG00000183779 | ZNF703       | 0.32                |                    | -0.14               |                    | 10.3                |                    | 1.9                 |                    | 12.2                   |                       |
| ENSG00000137968 | SLC44A5      | -0.30               |                    | -0.12               |                    | 9.2                 |                    | 1.4                 |                    | 10.6                   |                       |
| ENSG00000185758 | CLDN24       | 0.09                |                    | -0.25               |                    | 0.7                 |                    | 6.5                 |                    | 7.2                    |                       |
| ENSG00000230084 | RP4-613B23.1 | -0.24               |                    | 0.08                |                    | 5.7                 |                    | 0.6                 |                    | 6.3                    |                       |
| ENSG00000188886 | ASTL         | 0.15                |                    | 0.15                |                    | 2.3                 |                    | 2.2                 |                    | 4.6                    |                       |
| ENSG00000231865 | AP000936.3   | -0.14               |                    | -0.06               |                    | 2.0                 |                    | 0.4                 |                    | 2.3                    |                       |
| ENSG00000109321 | AREG         | -0.04               |                    | -0.13               |                    | 0.1                 |                    | 1.6                 |                    | 1.8                    |                       |
| ENSG00000197594 | ENPP1        | 0.07                |                    | 0.08                |                    | 0.5                 |                    | 0.6                 |                    | 1.1                    |                       |
| ENSG00000211895 | IGHA1        | -0.01               |                    | 0.01                |                    | 0.0                 |                    | 0.0                 |                    | 0.0                    |                       |

**Table A144:** Canonical loadings and explained variance (RNA-Seq, NK-cells, Day 1, Gene variables). Gene variables with at least 25% of explained variance for the first two canonical variates are listed. GX: canonical loadings for canonical variate X, VX: % explained variance for canonical variate X, V1+V2: total % explained variance for both canonical variates. Values for CCA results with a poor cross validation score (< 0.70) are left blank. Sorted by maximum explained variance across treatments (V1+V2).

| IMO Vari-<br>able | IMO Variable Name                   | I1<br>(SV-<br>AS03) | I1<br>(SV-<br>PBS) | I2<br>(SV-<br>AS03) | I2<br>(SV-<br>PBS) | V1<br>(SV-<br>AS03) | V1<br>(SV-<br>PBS) | V2<br>(SV-<br>AS03) | V2<br>(SV-<br>PBS) | V1+V2<br>(SV-<br>AS03) | V1+V2<br>(SV-<br>PBS) |
|-------------------|-------------------------------------|---------------------|--------------------|---------------------|--------------------|---------------------|--------------------|---------------------|--------------------|------------------------|-----------------------|
| MIP-1 $\alpha$    | Macrophage inflammatory protein     | -0.76               |                    | -0.54               |                    | 58.0                |                    | 29.0                |                    | 87.0                   |                       |
| IL-12p70          | Interleukin-12 p70                  | -0.53               |                    | 0.75                |                    | 27.6                |                    | 56.3                |                    | 83.9                   |                       |
| IP-10             | Interferon gamma-induced protein 10 | -0.53               |                    | -0.61               |                    | 28.4                |                    | 37.0                |                    | 65.4                   |                       |
| IL-6              | Interleukin-6                       | -0.61               |                    | 0.32                |                    | 37.2                |                    | 10.2                |                    | 47.4                   |                       |
| TNF               | Tumor necrosis factors              | 0.36                |                    | 0.56                |                    | 12.9                |                    | 31.8                |                    | 44.7                   |                       |
| Nt                | Microneutralization inhibition      | 0.48                |                    | -0.23               |                    | 23.1                |                    | 5.1                 |                    | 28.2                   |                       |
| Eotaxin-1         | Eotaxin-1                           | 0.50                |                    | 0.19                |                    | 24.6                |                    | 3.6                 |                    | 28.2                   |                       |
| IL-10             | Interleukin-10                      | -0.28               |                    | 0.43                |                    | 7.8                 |                    | 18.6                |                    | 26.4                   |                       |
| IL-1 $\beta$      | Interleukin-1 beta                  | -0.33               |                    | 0.18                |                    | 10.6                |                    | 3.3                 |                    | 13.9                   |                       |
| RANTES            | Chemokine (C-C motif) ligand 5      | -0.36               |                    | -0.09               |                    | 12.9                |                    | 0.8                 |                    | 13.8                   |                       |
| IFN- $\gamma$     | Interferon gamma                    | 0.16                |                    | 0.23                |                    | 2.6                 |                    | 5.2                 |                    | 7.8                    |                       |
| IL-8              | Interleukin-8                       | 0.13                |                    | 0.15                |                    | 1.7                 |                    | 2.1                 |                    | 3.8                    |                       |
| MCP-1             | Monocyte chemoattractant protein-1  | -0.13               |                    | -0.10               |                    | 1.8                 |                    | 0.9                 |                    | 2.7                    |                       |

**Table A145:** Canonical loadings and explained variance (RNA-Seq, NK-cells, Day 1, IMO variables). IMO variables with at least 25% of explained variance for the first two canonical variates are listed. GX: canonical loadings for canonical variate X, VX: % explained variance for canonical variate X, V1+V2: total % explained variance for both canonical variates. Values for CCA results with a poor cross validation score (< 0.70) are left blank. Sorted by maximum explained variance across treatments (V1+V2).

| Gene ID         | Gene Name | G1<br>(SV-<br>AS03) | G1<br>(SV-<br>PBS) | G2<br>(SV-<br>AS03) | G2<br>(SV-<br>PBS) | V1<br>(SV-<br>AS03) | V1<br>(SV-<br>PBS) | V2<br>(SV-<br>AS03) | V2<br>(SV-<br>PBS) | V1+V2<br>(SV-<br>AS03) | V1+V2<br>(SV-<br>PBS) |
|-----------------|-----------|---------------------|--------------------|---------------------|--------------------|---------------------|--------------------|---------------------|--------------------|------------------------|-----------------------|
| ENSG00000094804 | CDC6      | -0.74               | 0.35               | -0.64               | 0.51               | 54.1                | 12.1               | 41.2                | 26.5               | 95.4                   | 38.7                  |
| ENSG00000167900 | TK1       | -0.85               | 0.51               | -0.48               | 0.49               | 71.7                | 26.4               | 23.2                | 23.8               | 94.9                   | 50.2                  |
| ENSG00000093009 | CDC45     | -0.73               | 0.48               | -0.64               | 0.71               | 53.2                | 22.8               | 41.5                | 50.5               | 94.7                   | 73.3                  |
| ENSG00000178999 | AURKB     | -0.80               | 0.21               | -0.55               | -0.39              | 64.0                | 4.4                | 30.3                | 15.4               | 94.3                   | 19.8                  |
| ENSG00000176890 | TYMS      | -0.78               | 0.39               | -0.57               | 0.53               | 60.7                | 15.1               | 32.1                | 27.7               | 92.8                   | 42.9                  |
| ENSG00000121152 | NCAPH     | -0.74               | 0.49               | -0.59               | 0.52               | 55.0                | 23.7               | 34.3                | 27.4               | 89.3                   | 51.1                  |
| ENSG00000165891 | E2F7      | -0.64               | 0.47               | -0.69               | 0.58               | 40.6                | 22.4               | 48.1                | 33.9               | 88.7                   | 56.3                  |
| ENSG00000135451 | TROAP     | -0.79               | 0.59               | -0.51               | 0.12               | 62.6                | 34.4               | 26.0                | 1.6                | 88.6                   | 35.9                  |



| Gene ID         | Gene Name | G1<br>(SV-<br>AS03) | G1<br>(SV-<br>PBS) | G2<br>(SV-<br>AS03) | G2<br>(SV-<br>PBS) | V1<br>(SV-<br>AS03) | V1<br>(SV-<br>PBS) | V2<br>(SV-<br>AS03) | V2<br>(SV-<br>PBS) | V1+V2<br>(SV-<br>AS03) | V1+V2<br>(SV-<br>PBS) |
|-----------------|-----------|---------------------|--------------------|---------------------|--------------------|---------------------|--------------------|---------------------|--------------------|------------------------|-----------------------|
| ENSG00000101412 | E2F1      | -0.72               | 0.67               | -0.60               | 0.18               | 52.4                | 44.8               | 36.2                | 3.2                | 88.6                   | 48.0                  |
| ENSG00000051341 | POLQ      | -0.67               | 0.76               | -0.66               | 0.24               | 45.2                | 57.7               | 43.3                | 5.9                | 88.6                   | 63.6                  |
| ENSG00000007968 | E2F2      | -0.73               | 0.51               | -0.59               | -0.12              | 53.0                | 25.5               | 35.2                | 1.5                | 88.2                   | 27.0                  |
| ENSG00000089685 | BIRC5     | -0.61               | 0.20               | -0.71               | 0.72               | 37.7                | 4.0                | 49.7                | 52.1               | 87.4                   | 56.0                  |
| ENSG00000100162 | CENPM     | -0.88               | -0.57              | -0.29               | 0.07               | 78.1                | 32.2               | 8.6                 | 0.5                | 86.7                   | 32.7                  |
| ENSG00000127564 | PKMYT1    | -0.71               | 0.51               | -0.59               | 0.71               | 50.4                | 26.4               | 35.1                | 50.7               | 85.5                   | 77.1                  |
| ENSG00000244734 | HBB       | 0.44                | -0.43              | -0.81               | 0.01               | 19.7                | 18.8               | 65.5                | 0.0                | 85.3                   | 18.8                  |
| ENSG00000129173 | E2F8      | -0.68               | 0.59               | -0.62               | -0.02              | 45.9                | 34.9               | 38.7                | 0.1                | 84.5                   | 35.0                  |
| ENSG00000066279 | ASPM      | -0.60               | 0.64               | -0.70               | 0.51               | 35.9                | 41.4               | 48.4                | 25.9               | 84.4                   | 67.3                  |
| ENSG00000122966 | CIT       | -0.64               | 0.31               | -0.65               | -0.28              | 41.4                | 9.6                | 41.9                | 7.9                | 83.4                   | 17.5                  |
| ENSG00000101057 | MYBL2     | -0.71               | 0.63               | -0.57               | 0.51               | 50.5                | 39.6               | 32.2                | 26.2               | 82.7                   | 65.7                  |
| ENSG00000171848 | RRM2      | -0.60               | 0.63               | -0.57               | 0.65               | 35.9                | 39.6               | 32.5                | 42.8               | 68.4                   | 82.4                  |
| ENSG00000140534 | C15orf42  | -0.79               | 0.32               | -0.43               | 0.51               | 62.4                | 10.4               | 18.8                | 26.2               | 81.2                   | 36.7                  |
| ENSG00000189057 | FAM111B   | -0.56               | 0.64               | -0.70               | -0.14              | 31.9                | 41.1               | 48.8                | 2.0                | 80.7                   | 43.1                  |
| ENSG00000105173 | CCNE1     | -0.80               | 0.66               | -0.40               | 0.28               | 64.2                | 43.0               | 16.4                | 7.7                | 80.6                   | 50.7                  |
| ENSG00000011426 | ANLN      | -0.82               | 0.53               | -0.36               | 0.07               | 67.1                | 28.0               | 13.3                | 0.5                | 80.4                   | 28.5                  |
| ENSG00000131153 | GINS2     | -0.87               | 0.47               | -0.19               | 0.27               | 76.3                | 21.9               | 3.7                 | 7.2                | 80.0                   | 29.1                  |
| ENSG00000137812 | CASC5     | -0.67               | 0.00               | -0.60               | 0.18               | 44.3                | 0.0                | 35.6                | 3.3                | 80.0                   | 3.3                   |
| ENSG00000188536 | HBA2      | 0.34                | -0.46              | -0.83               | 0.06               | 11.4                | 21.3               | 68.6                | 0.3                | 79.9                   | 21.6                  |
| ENSG00000148773 | MKI67     | -0.56               | 0.53               | -0.70               | 0.60               | 31.3                | 27.6               | 48.6                | 36.1               | 79.9                   | 63.7                  |
| ENSG00000164045 | CDC25A    | -0.46               | 0.49               | -0.76               | 0.09               | 21.6                | 23.9               | 57.8                | 0.8                | 79.4                   | 24.7                  |
| ENSG00000131747 | TOP2A     | -0.70               | 0.33               | -0.55               | 0.64               | 48.5                | 10.7               | 30.7                | 40.5               | 79.3                   | 51.2                  |
| ENSG00000105011 | ASF1B     | -0.81               | 0.49               | -0.38               | -0.15              | 64.9                | 23.9               | 14.3                | 2.4                | 79.1                   | 26.2                  |
| ENSG00000065328 | MCM10     | -0.79               | 0.51               | -0.40               | 0.50               | 62.5                | 25.6               | 16.3                | 25.4               | 78.9                   | 51.0                  |
| ENSG00000170312 | CDK1      | -0.74               | 0.05               | -0.49               | 0.18               | 54.2                | 0.2                | 23.9                | 3.2                | 78.1                   | 3.4                   |
| ENSG00000167513 | CDT1      | -0.64               | 0.32               | -0.61               | 0.56               | 41.3                | 10.3               | 36.8                | 31.6               | 78.0                   | 41.9                  |
| ENSG00000122952 | ZWINT     | -0.80               | 0.73               | -0.38               | -0.36              | 63.6                | 53.9               | 14.3                | 13.0               | 78.0                   | 66.9                  |
| ENSG00000072571 | HMMR      | -0.74               | 0.30               | -0.47               | -0.07              | 55.2                | 9.1                | 21.9                | 0.5                | 77.0                   | 9.6                   |
| ENSG00000135476 | ESPL1     | -0.51               | 0.53               | -0.71               | -0.17              | 25.7                | 28.0               | 51.0                | 2.8                | 76.8                   | 30.8                  |
| ENSG00000118193 | KIF14     | -0.44               | 0.01               | -0.75               | 0.01               | 19.6                | 0.0                | 57.0                | 0.0                | 76.6                   | 0.0                   |
| ENSG00000112984 | KIF20A    | -0.74               | 0.16               | -0.46               | 0.47               | 54.9                | 2.7                | 21.6                | 22.2               | 76.4                   | 24.9                  |
| ENSG00000123485 | HJURP     | -0.68               | 0.81               | -0.55               | -0.06              | 46.1                | 66.1               | 30.0                | 0.3                | 76.1                   | 66.4                  |
| ENSG00000137807 | KIF23     | -0.48               | 0.26               | -0.73               | 0.32               | 23.4                | 6.6                | 52.6                | 10.1               | 76.0                   | 16.8                  |
| ENSG00000109805 | NCAPG     | -0.63               | 0.13               | -0.61               | 0.64               | 39.2                | 1.6                | 36.8                | 40.6               | 76.0                   | 42.2                  |
| ENSG00000075218 | GTSE1     | -0.47               | 0.28               | -0.73               | 0.40               | 22.4                | 7.6                | 53.5                | 15.6               | 75.9                   | 23.2                  |
| ENSG00000137804 | NUSAP1    | -0.77               | 0.54               | -0.41               | 0.48               | 59.1                | 29.7               | 16.6                | 22.7               | 75.7                   | 52.4                  |
| ENSG00000151725 | MLF1IP    | -0.66               | 0.56               | -0.56               | 0.20               | 44.1                | 31.3               | 31.6                | 4.1                | 75.7                   | 35.4                  |
| ENSG00000143476 | DTL       | -0.75               | 0.38               | -0.44               | 0.49               | 55.7                | 14.4               | 19.6                | 24.0               | 75.3                   | 38.4                  |
| ENSG00000146670 | CDA5      | -0.62               | 0.59               | -0.60               | 0.57               | 38.3                | 35.2               | 36.6                | 32.2               | 74.9                   | 67.5                  |
| ENSG00000156970 | BUB1B     | -0.59               | 0.05               | -0.63               | -0.45              | 35.0                | 0.3                | 39.5                | 20.1               | 74.5                   | 20.4                  |
| ENSG00000171241 | SHCBP1    | -0.46               | 0.65               | -0.72               | -0.08              | 20.8                | 42.4               | 52.2                | 0.7                | 73.1                   | 43.1                  |
| ENSG00000237649 | KIFC1     | -0.64               | 0.59               | -0.57               | 0.40               | 40.8                | 35.0               | 32.3                | 16.0               | 73.0                   | 51.0                  |
| ENSG00000169607 | CKAP2L    | -0.68               | 0.10               | -0.51               | 0.15               | 46.2                | 0.9                | 26.2                | 2.4                | 72.3                   | 3.3                   |
| ENSG00000088325 | TPX2      | -0.55               | -0.14              | -0.64               | 0.78               | 30.2                | 2.0                | 40.9                | 60.3               | 71.2                   | 62.3                  |
| ENSG00000180875 | GREM2     | 0.02                | -0.35              | -0.84               | -0.19              | 0.1                 | 12.4               | 71.1                | 3.8                | 71.1                   | 16.2                  |
| ENSG00000138180 | CEP55     | -0.48               | 0.83               | -0.37               | 0.17               | 23.2                | 68.2               | 14.0                | 2.9                | 37.2                   | 71.1                  |
| ENSG00000085999 | RAD54L    | -0.74               | 0.72               | -0.40               | 0.14               | 55.2                | 51.4               | 15.7                | 1.9                | 70.9                   | 53.3                  |
| ENSG00000163808 | KIF15     | -0.66               | 0.46               | -0.52               | 0.22               | 43.5                | 21.2               | 27.2                | 4.8                | 70.7                   | 26.0                  |
| ENSG00000243838 | PSMC1P7   | -0.15               | 0.18               | -0.82               | 0.46               | 2.2                 | 3.1                | 67.6                | 21.3               | 69.8                   | 24.4                  |
| ENSG00000206172 | HBA1      | 0.34                | -0.36              | -0.76               | 0.13               | 11.3                | 13.0               | 58.2                | 1.6                | 69.5                   | 14.6                  |
| ENSG00000139618 | BRCA2     | -0.55               | 0.66               | -0.63               | 0.33               | 29.9                | 43.5               | 39.6                | 10.8               | 69.5                   | 54.3                  |

| Gene ID         | Gene Name     | G1<br>(SV-<br>AS03) | G1<br>(SV-<br>PBS) | G2<br>(SV-<br>AS03) | G2<br>(SV-<br>PBS) | V1<br>(SV-<br>AS03) | V1<br>(SV-<br>PBS) | V2<br>(SV-<br>AS03) | V2<br>(SV-<br>PBS) | V1+V2<br>(SV-<br>AS03) | V1+V2<br>(SV-<br>PBS) |
|-----------------|---------------|---------------------|--------------------|---------------------|--------------------|---------------------|--------------------|---------------------|--------------------|------------------------|-----------------------|
| ENSG00000175643 | C16orf75      | -0.70               | -0.08              | -0.44               | -0.37              | 49.3                | 0.6                | 19.6                | 13.5               | 69.0                   | 14.1                  |
| ENSG00000165304 | MELK          | -0.59               | 0.58               | -0.57               | 0.49               | 34.8                | 34.0               | 32.7                | 24.5               | 67.5                   | 58.5                  |
| ENSG00000186185 | KIF18B        | -0.61               | 0.54               | -0.55               | -0.35              | 37.4                | 29.1               | 29.7                | 12.1               | 67.1                   | 41.2                  |
| ENSG00000186638 | KIF24         | -0.62               | 0.60               | -0.53               | -0.42              | 38.2                | 36.4               | 28.2                | 17.7               | 66.4                   | 54.1                  |
| ENSG00000179750 | APOBEC3B      | -0.47               | 0.15               | -0.66               | -0.20              | 22.2                | 2.1                | 43.5                | 3.9                | 65.7                   | 6.0                   |
| ENSG00000090104 | RGS1          | 0.17                | -0.30              | 0.09                | 0.75               | 2.9                 | 8.9                | 0.7                 | 56.3               | 3.7                    | 65.1                  |
| ENSG00000169679 | BUB1          | -0.32               | 0.18               | -0.73               | 0.17               | 10.4                | 3.3                | 52.9                | 2.8                | 63.2                   | 6.1                   |
| ENSG00000129195 | FAM64A        | -0.74               | 0.41               | -0.29               | -0.53              | 54.1                | 16.8               | 8.7                 | 27.7               | 62.8                   | 44.6                  |
| ENSG00000174371 | EXO1          | -0.64               | 0.54               | -0.46               | 0.11               | 40.6                | 29.5               | 21.2                | 1.2                | 61.8                   | 30.7                  |
| ENSG00000117724 | CENPF         | -0.47               | 0.51               | -0.63               | 0.12               | 22.0                | 26.3               | 39.3                | 1.5                | 61.3                   | 27.8                  |
| ENSG00000165480 | SKA3          | -0.58               | -0.28              | -0.52               | 0.65               | 33.7                | 7.8                | 26.8                | 42.3               | 60.5                   | 50.1                  |
| ENSG00000175063 | UBE2C         | -0.41               | 0.35               | -0.66               | -0.42              | 16.8                | 12.3               | 43.3                | 18.0               | 60.1                   | 30.3                  |
| ENSG00000186193 | C9orf140      | -0.56               | -0.51              | -0.53               | 0.32               | 31.5                | 25.7               | 28.4                | 10.5               | 59.9                   | 36.1                  |
| ENSG00000256663 | RP11-424C20.2 | -0.64               | 0.40               | -0.42               | -0.05              | 40.6                | 16.3               | 17.6                | 0.3                | 58.2                   | 16.6                  |
| ENSG00000182022 | CHST15        | 0.55                | -0.43              | -0.52               | 0.03               | 30.5                | 18.8               | 26.6                | 0.1                | 57.0                   | 18.9                  |
| ENSG00000136689 | IL1RN         | 0.56                | -0.48              | -0.51               | 0.19               | 31.4                | 22.6               | 25.6                | 3.6                | 57.0                   | 26.2                  |
| ENSG00000134531 | EMP1          | 0.60                | -0.55              | -0.44               | -0.43              | 36.4                | 30.6               | 19.4                | 18.4               | 55.8                   | 49.0                  |
| ENSG00000169385 | RNASE2        | 0.35                | -0.65              | -0.66               | -0.17              | 12.3                | 42.8               | 43.2                | 2.7                | 55.4                   | 45.6                  |
| ENSG00000211895 | IGHA1         | 0.44                | -0.70              | -0.54               | 0.24               | 19.7                | 49.6               | 29.2                | 5.8                | 48.9                   | 55.3                  |
| ENSG00000121621 | KIF18A        | -0.69               | 0.45               | -0.12               | 0.12               | 48.2                | 20.2               | 1.3                 | 1.4                | 49.6                   | 21.7                  |
| ENSG00000172037 | LAMB2         | 0.18                | -0.15              | -0.66               | 0.61               | 3.2                 | 2.2                | 44.0                | 37.2               | 47.2                   | 39.4                  |
| ENSG00000170345 | FOS           | 0.23                | -0.47              | -0.10               | 0.48               | 5.1                 | 22.3               | 1.0                 | 23.3               | 6.1                    | 45.5                  |
| ENSG00000126787 | DLGAP5        | -0.67               | -0.40              | -0.09               | 0.20               | 44.4                | 16.2               | 0.8                 | 4.2                | 45.2                   | 20.4                  |
| ENSG00000182240 | BACE2         | 0.12                | -0.64              | -0.08               | -0.20              | 1.4                 | 40.9               | 0.6                 | 4.0                | 2.0                    | 44.9                  |
| ENSG00000137959 | IFI44L        | -0.49               | 0.46               | -0.44               | -0.09              | 23.8                | 21.3               | 19.5                | 0.7                | 43.3                   | 22.0                  |
| ENSG00000112742 | TTK           | -0.58               | 0.41               | -0.28               | -0.27              | 33.4                | 16.5               | 7.7                 | 7.3                | 41.0                   | 23.8                  |
| ENSG00000224397 | RP11-290F20.3 | 0.21                | -0.21              | -0.60               | 0.25               | 4.3                 | 4.3                | 36.0                | 6.2                | 40.4                   | 10.5                  |
| ENSG00000138778 | CENPE         | -0.33               | 0.47               | -0.53               | -0.11              | 11.2                | 22.6               | 27.8                | 1.2                | 39.0                   | 23.7                  |
| ENSG00000115828 | QPCT          | 0.10                | -0.59              | -0.44               | -0.19              | 1.1                 | 34.6               | 19.3                | 3.6                | 20.4                   | 38.3                  |
| ENSG00000142945 | KIF2C         | -0.45               | 0.61               | -0.41               | -0.04              | 20.5                | 36.8               | 16.9                | 0.1                | 37.4                   | 36.9                  |
| ENSG00000197249 | SERPINA1      | 0.23                | -0.38              | -0.57               | -0.12              | 5.2                 | 14.3               | 32.0                | 1.4                | 37.2                   | 15.7                  |
| ENSG00000184661 | CDCA2         | -0.33               | 0.48               | -0.51               | 0.15               | 11.1                | 23.2               | 26.1                | 2.2                | 37.2                   | 25.4                  |
| ENSG00000103832 | RP5-1086D14.1 | -0.23               | 0.02               | -0.54               | 0.34               | 5.4                 | 0.1                | 29.5                | 11.8               | 34.9                   | 11.8                  |
| ENSG00000204103 | MAFB          | 0.45                | -0.22              | -0.37               | 0.01               | 20.7                | 4.7                | 13.9                | 0.0                | 34.5                   | 4.7                   |
| ENSG00000153234 | NR4A2         | -0.50               | -0.42              | -0.23               | 0.41               | 24.7                | 17.3               | 5.2                 | 17.2               | 29.9                   | 34.5                  |
| ENSG00000125740 | FOSB          | 0.53                | -0.31              | 0.25                | 0.38               | 27.8                | 9.4                | 6.0                 | 14.2               | 33.8                   | 23.5                  |
| ENSG00000166927 | MS4A7         | 0.03                | -0.38              | -0.55               | -0.19              | 0.1                 | 14.3               | 30.7                | 3.7                | 30.8                   | 18.0                  |
| ENSG00000117399 | CDC20         | -0.39               | 0.04               | -0.37               | -0.12              | 15.5                | 0.2                | 14.0                | 1.4                | 29.5                   | 1.6                   |
| ENSG00000232487 | RASA3-IT1     | -0.02               | 0.01               | -0.49               | 0.51               | 0.0                 | 0.0                | 24.3                | 25.6               | 24.3                   | 25.6                  |
| ENSG00000197405 | C5AR1         | 0.24                | -0.09              | -0.44               | 0.06               | 5.8                 | 0.8                | 19.7                | 0.4                | 25.5                   | 1.2                   |
| ENSG00000174837 | EMR1          | -0.34               | -0.40              | -0.18               | 0.28               | 11.3                | 16.1               | 3.2                 | 7.9                | 14.6                   | 23.9                  |
| ENSG00000254873 | RP11-770J1.5  | 0.29                | 0.29               | -0.38               | 0.23               | 8.4                 | 8.5                | 14.7                | 5.3                | 23.1                   | 13.8                  |
| ENSG00000109321 | AREG          | -0.11               | -0.02              | 0.05                | 0.46               | 1.2                 | 0.0                | 0.3                 | 20.8               | 1.4                    | 20.8                  |
| ENSG00000167641 | PPP1R14A      | -0.42               | -0.42              | 0.09                | 0.18               | 17.9                | 17.7               | 0.8                 | 3.1                | 18.7                   | 20.8                  |
| ENSG00000035499 | DEPDC1B       | -0.38               | 0.21               | -0.15               | -0.10              | 14.7                | 4.3                | 2.2                 | 1.0                | 16.9                   | 5.3                   |
| ENSG00000004799 | PDK4          | 0.41                | -0.05              | 0.02                | -0.17              | 16.4                | 0.3                | 0.0                 | 2.9                | 16.5                   | 3.2                   |
| ENSG00000233392 | AC104809.4    | 0.11                | -0.05              | 0.23                | 0.36               | 1.2                 | 0.2                | 5.1                 | 13.2               | 6.3                    | 13.4                  |
| ENSG00000162367 | TAL1          | 0.26                | -0.21              | 0.23                | -0.30              | 6.8                 | 4.2                | 5.3                 | 9.2                | 12.0                   | 13.4                  |
| ENSG00000183779 | ZNF703        | -0.22               | 0.11               | -0.26               | 0.02               | 4.8                 | 1.3                | 6.9                 | 0.0                | 11.7                   | 1.3                   |
| ENSG00000107954 | NEURL         | 0.01                | -0.13              | -0.28               | 0.12               | 0.0                 | 1.6                | 7.8                 | 1.3                | 7.8                    | 2.9                   |

| Gene ID         | Gene Name | G1<br>(SV-<br>AS03) | G1<br>(SV-<br>PBS) | G2<br>(SV-<br>AS03) | G2<br>(SV-<br>PBS) | V1<br>(SV-<br>AS03) | V1<br>(SV-<br>PBS) | V2<br>(SV-<br>AS03) | V2<br>(SV-<br>PBS) | V1+V2<br>(SV-<br>AS03) | V1+V2<br>(SV-<br>PBS) |
|-----------------|-----------|---------------------|--------------------|---------------------|--------------------|---------------------|--------------------|---------------------|--------------------|------------------------|-----------------------|
| ENSG00000129757 | CDKN1C    | -0.08               | -0.01              | 0.02                | -0.22              | 0.6                 | 0.0                | 0.0                 | 4.8                | 0.6                    | 4.8                   |

**Table A146:** Canonical loadings and explained variance (RNA-Seq, NK-cells, Day 3, Gene variables). Gene variables with at least 25% of explained variance for the first two canonical variates are listed. GX: canonical loadings for canonical variate X, VX: % explained variance for canonical variate X, V1+V2: total % explained variance for both canonical variates. Values for CCA results with a poor cross validation score (< 0.70) are left blank. Sorted by maximum explained variance across treatments (V1+V2).

| IMO Vari-<br>able | IMO Variable Name                   | I1<br>(SV-<br>AS03) | I1<br>(SV-<br>PBS) | I2<br>(SV-<br>AS03) | I2<br>(SV-<br>PBS) | V1<br>(SV-<br>AS03) | V1<br>(SV-<br>PBS) | V2<br>(SV-<br>AS03) | V2<br>(SV-<br>PBS) | V1+V2<br>(SV-<br>AS03) | V1+V2<br>(SV-<br>PBS) |
|-------------------|-------------------------------------|---------------------|--------------------|---------------------|--------------------|---------------------|--------------------|---------------------|--------------------|------------------------|-----------------------|
| IP-10             | Interferon gamma-induced protein 10 | -0.69               | 0.12               | -0.62               | 0.88               | 47.3                | 1.6                | 38.3                | 76.9               | 85.7                   | 78.4                  |
| TNF               | Tumor necrosis factors              | -0.52               | 0.91               | 0.20                | -0.10              | 27.0                | 82.8               | 3.9                 | 1.0                | 30.9                   | 83.8                  |
| MIP-1 $\alpha$    | Macrophage inflammatory protein     | -0.38               | 0.29               | 0.42                | 0.85               | 14.3                | 8.1                | 17.7                | 73.0               | 32.0                   | 81.1                  |
| MCP-1             | Monocyte chemoattractant protein-1  | 0.55                | -0.06              | -0.03               | 0.89               | 29.7                | 0.3                | 0.1                 | 79.4               | 29.8                   | 79.7                  |
| IL-12p70          | Interleukin-12 p70                  | -0.78               | 0.60               | 0.41                | -0.33              | 61.1                | 35.8               | 17.1                | 11.1               | 78.2                   | 46.8                  |
| IL-10             | Interleukin-10                      | -0.73               | 0.86               | 0.17                | -0.15              | 53.2                | 74.4               | 2.8                 | 2.2                | 56.0                   | 76.6                  |
| IFN- $\gamma$     | Interferon gamma                    | 0.04                | 0.71               | 0.81                | -0.27              | 0.2                 | 50.0               | 65.5                | 7.3                | 65.6                   | 57.3                  |
| IL-1 $\beta$      | Interleukin-1 beta                  | -0.71               | 0.65               | 0.37                | -0.32              | 50.7                | 42.4               | 13.6                | 10.3               | 64.3                   | 52.7                  |
| IL-8              | Interleukin-8                       | -0.56               | 0.72               | 0.41                | 0.08               | 31.1                | 51.5               | 16.6                | 0.6                | 47.7                   | 52.1                  |
| RANTES            | Chemokine (C-C motif) ligand 5      | 0.07                | -0.24              | -0.24               | 0.66               | 0.5                 | 5.7                | 5.6                 | 44.1               | 6.0                    | 49.8                  |
| IL-6              | Interleukin-6                       | -0.20               | 0.55               | 0.65                | -0.18              | 4.0                 | 30.6               | 42.6                | 3.1                | 46.6                   | 33.7                  |
| Nt                | Microneutralization inhibition      | 0.56                | 0.41               | -0.00               | 0.06               | 31.6                | 17.0               | 0.0                 | 0.4                | 31.6                   | 17.4                  |
| Eotaxin-1         | Eotaxin-1                           | 0.04                | 0.10               | -0.30               | 0.54               | 0.1                 | 1.0                | 8.8                 | 29.2               | 8.9                    | 30.1                  |

**Table A147:** Canonical loadings and explained variance (RNA-Seq, NK-cells, Day 3, IMO variables). IMO variables with at least 25% of explained variance for the first two canonical variates are listed. GX: canonical loadings for canonical variate X, VX: % explained variance for canonical variate X, V1+V2: total % explained variance for both canonical variates. Values for CCA results with a poor cross validation score (< 0.70) are left blank. Sorted by maximum explained variance across treatments (V1+V2).

| Gene ID         | Gene Name     | G1<br>(SV-<br>AS03) | G1<br>(SV-<br>PBS) | G2<br>(SV-<br>AS03) | G2<br>(SV-<br>PBS) | V1<br>(SV-<br>AS03) | V1<br>(SV-<br>PBS) | V2<br>(SV-<br>AS03) | V2<br>(SV-<br>PBS) | V1+V2<br>(SV-<br>AS03) | V1+V2<br>(SV-<br>PBS) |
|-----------------|---------------|---------------------|--------------------|---------------------|--------------------|---------------------|--------------------|---------------------|--------------------|------------------------|-----------------------|
| ENSG00000105967 | TFEC          |                     | 0.86               |                     | -0.46              |                     | 74.7               |                     | 20.9               |                        | 95.6                  |
| ENSG00000121552 | CSTA          |                     | 0.86               |                     | -0.34              |                     | 73.4               |                     | 11.3               |                        | 84.7                  |
| ENSG00000198053 | SIRPA         |                     | 0.84               |                     | -0.25              |                     | 70.9               |                     | 6.2                |                        | 77.2                  |
| ENSG00000177575 | CD163         |                     | 0.81               |                     | -0.31              |                     | 65.9               |                     | 9.5                |                        | 75.4                  |
| ENSG00000136826 | KLF4          |                     | 0.78               |                     | -0.36              |                     | 61.1               |                     | 13.3               |                        | 74.4                  |
| ENSG00000198478 | SH3BGRL2      |                     | -0.29              |                     | -0.80              |                     | 8.5                |                     | 63.7               |                        | 72.2                  |
| ENSG00000136689 | IL1RN         |                     | 0.72               |                     | -0.42              |                     | 51.6               |                     | 17.8               |                        | 69.3                  |
| ENSG00000074964 | ARHGEF10L     |                     | 0.81               |                     | -0.17              |                     | 65.6               |                     | 2.8                |                        | 68.4                  |
| ENSG00000049323 | LTBP1         |                     | 0.75               |                     | -0.31              |                     | 56.1               |                     | 9.7                |                        | 65.8                  |
| ENSG00000029534 | ANK1          |                     | 0.75               |                     | 0.13               |                     | 56.6               |                     | 1.6                |                        | 58.3                  |
| ENSG00000103832 | RP5-1086D14.1 |                     | 0.74               |                     | 0.04               |                     | 54.8               |                     | 0.2                |                        | 55.0                  |
| ENSG00000180071 | ANKRD18A      |                     | -0.08              |                     | 0.72               |                     | 0.6                |                     | 52.4               |                        | 53.1                  |
| ENSG00000169385 | RNASE2        |                     | 0.68               |                     | -0.23              |                     | 46.0               |                     | 5.3                |                        | 51.3                  |
| ENSG00000224397 | RP11-290F20.3 |                     | 0.07               |                     | -0.64              |                     | 0.5                |                     | 40.3               |                        | 40.8                  |
| ENSG00000184060 | ADAP2         |                     | 0.54               |                     | -0.17              |                     | 28.8               |                     | 2.8                |                        | 31.6                  |
| ENSG00000206172 | HBA1          |                     | 0.26               |                     | -0.49              |                     | 6.8                |                     | 23.9               |                        | 30.7                  |

| Gene ID         | Gene Name  | G1<br>(SV-<br>AS03) | G1<br>(SV-<br>PBS) | G2<br>(SV-<br>AS03) | G2<br>(SV-<br>PBS) | V1<br>(SV-<br>AS03) | V1<br>(SV-<br>PBS) | V2<br>(SV-<br>AS03) | V2<br>(SV-<br>PBS) | V1+V2<br>(SV-<br>AS03) | V1+V2<br>(SV-<br>PBS) |
|-----------------|------------|---------------------|--------------------|---------------------|--------------------|---------------------|--------------------|---------------------|--------------------|------------------------|-----------------------|
| ENSG00000134531 | EMP1       |                     | 0.36               |                     | -0.41              |                     | 12.8               |                     | 17.1               |                        | 29.9                  |
| ENSG00000117399 | CDC20      |                     | -0.51              |                     | -0.19              |                     | 25.8               |                     | 3.7                |                        | 29.6                  |
| ENSG00000211895 | IGHA1      |                     | -0.38              |                     | -0.38              |                     | 14.8               |                     | 14.4               |                        | 29.2                  |
| ENSG00000244734 | HBB        |                     | -0.07              |                     | -0.53              |                     | 0.5                |                     | 28.5               |                        | 29.0                  |
| ENSG00000188536 | HBA2       |                     | -0.03              |                     | -0.50              |                     | 0.1                |                     | 25.5               |                        | 25.5                  |
| ENSG00000236304 | AP001189.4 |                     | -0.05              |                     | -0.50              |                     | 0.2                |                     | 25.1               |                        | 25.3                  |
| ENSG00000211899 | IGHM       |                     | 0.05               |                     | -0.50              |                     | 0.3                |                     | 24.8               |                        | 25.1                  |
| ENSG00000126787 | DLGAP5     |                     | -0.08              |                     | -0.49              |                     | 0.6                |                     | 24.4               |                        | 25.1                  |
| ENSG00000157456 | CCNB2      |                     | -0.32              |                     | -0.31              |                     | 10.0               |                     | 9.5                |                        | 19.5                  |
| ENSG00000138180 | CEP55      |                     | 0.39               |                     | -0.06              |                     | 14.9               |                     | 0.4                |                        | 15.2                  |
| ENSG00000165480 | SKA3       |                     | 0.37               |                     | -0.04              |                     | 13.5               |                     | 0.2                |                        | 13.7                  |
| ENSG00000169679 | BUB1       |                     | -0.01              |                     | 0.34               |                     | 0.0                |                     | 11.8               |                        | 11.8                  |
| ENSG00000185736 | ADARB2     |                     | -0.20              |                     | 0.28               |                     | 3.9                |                     | 7.7                |                        | 11.7                  |
| ENSG00000233392 | AC104809.4 |                     | 0.22               |                     | -0.19              |                     | 5.0                |                     | 3.6                |                        | 8.6                   |
| ENSG00000168913 | ENHO       |                     | -0.27              |                     | 0.11               |                     | 7.3                |                     | 1.2                |                        | 8.5                   |
| ENSG00000125740 | FOSB       |                     | -0.02              |                     | -0.19              |                     | 0.0                |                     | 3.7                |                        | 3.7                   |
| ENSG00000225556 | C2CD4D     |                     | 0.12               |                     | 0.05               |                     | 1.4                |                     | 0.3                |                        | 1.7                   |

**Table A148:** Canonical loadings and explained variance (RNA-Seq, NK-cells, Day 7, Gene variables). Gene variables with at least 25% of explained variance for the first two canonical variates are listed. GX: canonical loadings for canonical variate X, VX: % explained variance for canonical variate X, V1+V2: total % explained variance for both canonical variates. Values for CCA results with a poor cross validation score (< 0.70) are left blank. Sorted by maximum explained variance across treatments (V1+V2).

| IMO Vari-<br>able | IMO Variable Name                   | I1<br>(SV-<br>AS03) | I1<br>(SV-<br>PBS) | I2<br>(SV-<br>AS03) | I2<br>(SV-<br>PBS) | V1<br>(SV-<br>AS03) | V1<br>(SV-<br>PBS) | V2<br>(SV-<br>AS03) | V2<br>(SV-<br>PBS) | V1+V2<br>(SV-<br>AS03) | V1+V2<br>(SV-<br>PBS) |
|-------------------|-------------------------------------|---------------------|--------------------|---------------------|--------------------|---------------------|--------------------|---------------------|--------------------|------------------------|-----------------------|
| MIP-1 $\alpha$    | Macrophage inflammatory protein     |                     | 0.87               |                     | 0.47               |                     | 75.2               |                     | 22.3               |                        | 97.6                  |
| IP-10             | Interferon gamma-induced protein 10 |                     | 0.95               |                     | 0.03               |                     | 90.4               |                     | 0.1                |                        | 90.4                  |
| IL-1 $\beta$      | Interleukin-1 beta                  |                     | -0.80              |                     | -0.04              |                     | 64.1               |                     | 0.2                |                        | 64.3                  |
| MCP-1             | Monocyte chemoattractant protein-1  |                     | 0.75               |                     | 0.19               |                     | 55.6               |                     | 3.5                |                        | 59.1                  |
| TNF               | Tumor necrosis factors              |                     | -0.38              |                     | 0.62               |                     | 14.3               |                     | 38.0               |                        | 52.3                  |
| RANTES            | Chemokine (C-C motif) ligand 5      |                     | 0.24               |                     | -0.67              |                     | 5.7                |                     | 44.8               |                        | 50.6                  |
| Eotaxin-1         | Eotaxin-1                           |                     | -0.68              |                     | -0.16              |                     | 45.9               |                     | 2.6                |                        | 48.5                  |
| Nt                | Microneutralization inhibition      |                     | 0.36               |                     | 0.59               |                     | 13.1               |                     | 34.5               |                        | 47.6                  |
| IL-8              | Interleukin-8                       |                     | 0.00               |                     | 0.68               |                     | 0.0                |                     | 46.3               |                        | 46.3                  |
| IL-6              | Interleukin-6                       |                     | -0.42              |                     | 0.54               |                     | 17.3               |                     | 28.9               |                        | 46.2                  |
| IFN- $\gamma$     | Interferon gamma                    |                     | -0.38              |                     | 0.55               |                     | 14.7               |                     | 30.6               |                        | 45.2                  |
| IL-12p70          | Interleukin-12 p70                  |                     | -0.48              |                     | -0.33              |                     | 23.0               |                     | 10.9               |                        | 33.8                  |
| IL-10             | Interleukin-10                      |                     | -0.04              |                     | -0.00              |                     | 0.1                |                     | 0.0                |                        | 0.1                   |

**Table A149:** Canonical loadings and explained variance (RNA-Seq, NK-cells, Day 7, IMO variables). IMO variables with at least 25% of explained variance for the first two canonical variates are listed. GX: canonical loadings for canonical variate X, VX: % explained variance for canonical variate X, V1+V2: total % explained variance for both canonical variates. Values for CCA results with a poor cross validation score (< 0.70) are left blank. Sorted by maximum explained variance across treatments (V1+V2).

| Gene ID         | Gene Name   | G1<br>(SV-<br>AS03) | G1<br>(SV-<br>PBS) | G2<br>(SV-<br>AS03) | G2<br>(SV-<br>PBS) | V1<br>(SV-<br>AS03) | V1<br>(SV-<br>PBS) | V2<br>(SV-<br>AS03) | V2<br>(SV-<br>PBS) | V1+V2<br>(SV-<br>AS03) | V1+V2<br>(SV-<br>PBS) |
|-----------------|-------------|---------------------|--------------------|---------------------|--------------------|---------------------|--------------------|---------------------|--------------------|------------------------|-----------------------|
| ENSG00000110446 | SLC15A3     | 0.90                |                    | 0.02                |                    | 81.5                |                    | 0.0                 |                    | 81.6                   |                       |
| ENSG00000179467 | AL109806.1  | 0.51                |                    | -0.74               |                    | 26.1                |                    | 54.6                |                    | 80.7                   |                       |
| ENSG00000087253 | LPCAT2      | 0.88                |                    | -0.05               |                    | 77.7                |                    | 0.3                 |                    | 78.0                   |                       |
| ENSG00000242498 | C15orf38    | 0.88                |                    | -0.05               |                    | 77.7                |                    | 0.3                 |                    | 78.0                   |                       |
| ENSG00000162882 | HAAO        | 0.76                |                    | -0.43               |                    | 57.1                |                    | 18.5                |                    | 75.6                   |                       |
| ENSG00000153162 | BMP6        | -0.86               |                    | -0.05               |                    | 74.6                |                    | 0.3                 |                    | 74.8                   |                       |
| ENSG00000169403 | PTAFR       | 0.78                |                    | 0.36                |                    | 61.5                |                    | 13.3                |                    | 74.8                   |                       |
| ENSG00000175538 | KCNE3       | 0.81                |                    | 0.31                |                    | 65.1                |                    | 9.6                 |                    | 74.6                   |                       |
| ENSG00000136205 | TNS3        | 0.75                |                    | 0.42                |                    | 56.7                |                    | 17.6                |                    | 74.3                   |                       |
| ENSG00000002933 | TMEM176A    | 0.68                |                    | 0.53                |                    | 45.8                |                    | 28.0                |                    | 73.9                   |                       |
| ENSG00000171777 | RASGRP4     | 0.86                |                    | 0.02                |                    | 73.4                |                    | 0.0                 |                    | 73.4                   |                       |
| ENSG00000184113 | CLDN5       | -0.82               |                    | -0.23               |                    | 67.6                |                    | 5.4                 |                    | 73.0                   |                       |
| ENSG00000135218 | CD36        | 0.84                |                    | -0.11               |                    | 71.2                |                    | 1.3                 |                    | 72.4                   |                       |
| ENSG00000106565 | TMEM176B    | 0.81                |                    | 0.23                |                    | 66.0                |                    | 5.5                 |                    | 71.4                   |                       |
| ENSG00000131042 | LILRB2      | 0.79                |                    | 0.31                |                    | 61.9                |                    | 9.4                 |                    | 71.3                   |                       |
| ENSG00000100095 | SEZ6L       | 0.83                |                    | 0.03                |                    | 69.2                |                    | 0.1                 |                    | 69.3                   |                       |
| ENSG00000188906 | LRRK2       | 0.82                |                    | -0.13               |                    | 67.4                |                    | 1.8                 |                    | 69.2                   |                       |
| ENSG00000161642 | ZNF385A     | 0.83                |                    | -0.05               |                    | 68.2                |                    | 0.3                 |                    | 68.4                   |                       |
| ENSG00000111452 | GPR133      | 0.61                |                    | 0.56                |                    | 36.6                |                    | 31.7                |                    | 68.3                   |                       |
| ENSG00000161944 | ASGR2       | 0.82                |                    | 0.04                |                    | 68.0                |                    | 0.1                 |                    | 68.2                   |                       |
| ENSG00000074964 | ARHGEF10L   | 0.82                |                    | -0.03               |                    | 67.5                |                    | 0.1                 |                    | 67.6                   |                       |
| ENSG00000127954 | STEAP4      | 0.68                |                    | -0.45               |                    | 46.6                |                    | 20.6                |                    | 67.2                   |                       |
| ENSG00000163694 | RBM47       | 0.80                |                    | 0.17                |                    | 64.3                |                    | 2.9                 |                    | 67.1                   |                       |
| ENSG00000060982 | BCAT1       | 0.81                |                    | -0.07               |                    | 66.1                |                    | 0.4                 |                    | 66.5                   |                       |
| ENSG00000103196 | CRISPLD2    | 0.67                |                    | 0.46                |                    | 44.9                |                    | 21.6                |                    | 66.5                   |                       |
| ENSG00000173334 | TRIB1       | 0.75                |                    | 0.31                |                    | 56.7                |                    | 9.6                 |                    | 66.3                   |                       |
| ENSG00000103313 | MEFV        | 0.81                |                    | 0.06                |                    | 65.6                |                    | 0.3                 |                    | 65.9                   |                       |
| ENSG00000123384 | LRP1        | 0.80                |                    | 0.12                |                    | 64.4                |                    | 1.4                 |                    | 65.8                   |                       |
| ENSG00000198053 | SIRPA       | 0.81                |                    | 0.05                |                    | 65.4                |                    | 0.2                 |                    | 65.7                   |                       |
| ENSG00000033627 | ATP6V0A1    | 0.80                |                    | 0.10                |                    | 64.3                |                    | 1.1                 |                    | 65.4                   |                       |
| ENSG00000132694 | ARHGEF11    | 0.80                |                    | -0.07               |                    | 63.9                |                    | 0.5                 |                    | 64.5                   |                       |
| ENSG00000038427 | VCAN        | 0.80                |                    | -0.03               |                    | 63.9                |                    | 0.1                 |                    | 64.0                   |                       |
| ENSG00000127920 | GNG11       | -0.77               |                    | -0.21               |                    | 59.4                |                    | 4.4                 |                    | 63.8                   |                       |
| ENSG00000129226 | CD68        | 0.78                |                    | 0.18                |                    | 60.4                |                    | 3.2                 |                    | 63.6                   |                       |
| ENSG00000215458 | AP001053.11 | 0.79                |                    | 0.13                |                    | 61.8                |                    | 1.7                 |                    | 63.5                   |                       |
| ENSG00000119535 | CSF3R       | 0.79                |                    | 0.07                |                    | 62.6                |                    | 0.5                 |                    | 63.1                   |                       |
| ENSG00000177706 | FAM20C      | 0.77                |                    | 0.19                |                    | 59.5                |                    | 3.6                 |                    | 63.1                   |                       |
| ENSG00000186407 | CD300E      | 0.79                |                    | -0.08               |                    | 62.1                |                    | 0.7                 |                    | 62.8                   |                       |
| ENSG00000116962 | NID1        | 0.77                |                    | -0.18               |                    | 59.6                |                    | 3.2                 |                    | 62.7                   |                       |
| ENSG00000187796 | CARD9       | 0.79                |                    | 0.01                |                    | 61.9                |                    | 0.0                 |                    | 61.9                   |                       |
| ENSG00000198502 | HLA-DRB5    | 0.78                |                    | 0.08                |                    | 61.2                |                    | 0.7                 |                    | 61.8                   |                       |
| ENSG00000151650 | VENTX       | 0.73                |                    | -0.28               |                    | 53.7                |                    | 7.8                 |                    | 61.6                   |                       |
| ENSG00000250510 | GPR162      | 0.74                |                    | -0.27               |                    | 54.3                |                    | 7.0                 |                    | 61.4                   |                       |
| ENSG00000178695 | KCTD12      | 0.78                |                    | 0.04                |                    | 61.2                |                    | 0.2                 |                    | 61.3                   |                       |
| ENSG00000110077 | MS4A6A      | 0.78                |                    | -0.10               |                    | 60.1                |                    | 0.9                 |                    | 61.1                   |                       |
| ENSG00000153823 | PID1        | 0.74                |                    | -0.24               |                    | 54.7                |                    | 6.0                 |                    | 60.7                   |                       |
| ENSG00000198598 | MMP17       | 0.75                |                    | 0.19                |                    | 57.0                |                    | 3.6                 |                    | 60.6                   |                       |
| ENSG00000105352 | CEACAM4     | 0.67                |                    | -0.39               |                    | 44.8                |                    | 15.4                |                    | 60.2                   |                       |
| ENSG00000182578 | CSF1R       | 0.77                |                    | -0.05               |                    | 59.8                |                    | 0.3                 |                    | 60.1                   |                       |
| ENSG00000196189 | SEMA4A      | 0.77                |                    | -0.03               |                    | 60.0                |                    | 0.1                 |                    | 60.0                   |                       |
| ENSG00000153885 | KCTD15      | 0.56                |                    | -0.54               |                    | 31.1                |                    | 28.7                |                    | 59.8                   |                       |

| Gene ID         | Gene Name | G1<br>(SV-<br>AS03) | G1<br>(SV-<br>PBS) | G2<br>(SV-<br>AS03) | G2<br>(SV-<br>PBS) | V1<br>(SV-<br>AS03) | V1<br>(SV-<br>PBS) | V2<br>(SV-<br>AS03) | V2<br>(SV-<br>PBS) | V1+V2<br>(SV-<br>AS03) | V1+V2<br>(SV-<br>PBS) |
|-----------------|-----------|---------------------|--------------------|---------------------|--------------------|---------------------|--------------------|---------------------|--------------------|------------------------|-----------------------|
| ENSG00000100079 | LGALS2    | 0.76                |                    | -0.14               |                    | 57.9                |                    | 1.9                 |                    | 59.8                   |                       |
| ENSG00000085265 | FCN1      | 0.77                |                    | 0.03                |                    | 59.6                |                    | 0.1                 |                    | 59.7                   |                       |
| ENSG00000159399 | HK2       | 0.75                |                    | 0.16                |                    | 56.9                |                    | 2.7                 |                    | 59.6                   |                       |
| ENSG00000116701 | NCF2      | 0.77                |                    | -0.03               |                    | 59.3                |                    | 0.1                 |                    | 59.4                   |                       |
| ENSG00000196562 | SULF2     | 0.77                |                    | 0.01                |                    | 59.2                |                    | 0.0                 |                    | 59.3                   |                       |
| ENSG00000216490 | IFI30     | 0.77                |                    | 0.03                |                    | 59.1                |                    | 0.1                 |                    | 59.3                   |                       |
| ENSG00000166145 | SPINT1    | 0.76                |                    | 0.14                |                    | 57.2                |                    | 2.0                 |                    | 59.2                   |                       |
| ENSG00000235568 | NFAM1     | 0.76                |                    | 0.09                |                    | 57.9                |                    | 0.8                 |                    | 58.6                   |                       |
| ENSG00000131398 | KCNC3     | 0.75                |                    | -0.13               |                    | 56.9                |                    | 1.7                 |                    | 58.6                   |                       |
| ENSG00000139132 | FGD4      | 0.70                |                    | -0.31               |                    | 48.4                |                    | 9.7                 |                    | 58.2                   |                       |
| ENSG00000167600 | CYP2S1    | 0.76                |                    | -0.02               |                    | 57.9                |                    | 0.0                 |                    | 57.9                   |                       |
| ENSG00000106066 | CPVL      | 0.75                |                    | -0.14               |                    | 55.5                |                    | 2.1                 |                    | 57.6                   |                       |
| ENSG00000079308 | TNS1      | -0.74               |                    | -0.17               |                    | 54.4                |                    | 3.0                 |                    | 57.5                   |                       |
| ENSG00000172243 | CLEC7A    | 0.76                |                    | -0.01               |                    | 57.3                |                    | 0.0                 |                    | 57.3                   |                       |
| ENSG00000197249 | SERPINA1  | 0.75                |                    | 0.05                |                    | 56.9                |                    | 0.3                 |                    | 57.2                   |                       |
| ENSG00000170909 | OSCAR     | 0.73                |                    | 0.18                |                    | 53.8                |                    | 3.1                 |                    | 56.9                   |                       |
| ENSG00000244482 | LILRA6    | 0.75                |                    | 0.06                |                    | 56.4                |                    | 0.3                 |                    | 56.7                   |                       |
| ENSG00000214212 | C19orf38  | 0.75                |                    | -0.09               |                    | 55.7                |                    | 0.8                 |                    | 56.4                   |                       |
| ENSG00000181631 | P2RY13    | 0.75                |                    | -0.06               |                    | 55.9                |                    | 0.4                 |                    | 56.3                   |                       |
| ENSG00000109113 | RAB34     | 0.75                |                    | -0.05               |                    | 55.5                |                    | 0.2                 |                    | 55.7                   |                       |
| ENSG00000185215 | TNFAIP2   | 0.73                |                    | -0.15               |                    | 53.3                |                    | 2.3                 |                    | 55.6                   |                       |
| ENSG0000010327  | STAB1     | 0.72                |                    | 0.19                |                    | 52.0                |                    | 3.4                 |                    | 55.5                   |                       |
| ENSG00000166927 | MS4A7     | 0.73                |                    | -0.12               |                    | 53.6                |                    | 1.6                 |                    | 55.2                   |                       |
| ENSG00000169385 | RNASE2    | 0.73                |                    | 0.12                |                    | 53.4                |                    | 1.4                 |                    | 54.8                   |                       |
| ENSG00000177575 | CD163     | 0.74                |                    | -0.06               |                    | 54.4                |                    | 0.3                 |                    | 54.7                   |                       |
| ENSG00000163563 | MNDA      | 0.73                |                    | 0.12                |                    | 53.3                |                    | 1.5                 |                    | 54.7                   |                       |
| ENSG00000164125 | FAM198B   | 0.74                |                    | 0.01                |                    | 54.6                |                    | 0.0                 |                    | 54.6                   |                       |
| ENSG00000120708 | TGFBI     | 0.73                |                    | 0.09                |                    | 53.6                |                    | 0.9                 |                    | 54.4                   |                       |
| ENSG0000010610  | CD4       | 0.73                |                    | 0.12                |                    | 52.9                |                    | 1.4                 |                    | 54.3                   |                       |
| ENSG00000165801 | ARHGEF40  | 0.71                |                    | -0.21               |                    | 49.9                |                    | 4.3                 |                    | 54.2                   |                       |
| ENSG00000101336 | HCK       | 0.70                |                    | -0.22               |                    | 49.1                |                    | 4.9                 |                    | 54.0                   |                       |
| ENSG00000088827 | SIGLEC1   | 0.73                |                    | -0.06               |                    | 53.6                |                    | 0.4                 |                    | 53.9                   |                       |
| ENSG00000066336 | SPI1      | 0.73                |                    | 0.02                |                    | 53.7                |                    | 0.0                 |                    | 53.8                   |                       |
| ENSG00000146592 | CREB5     | 0.71                |                    | -0.17               |                    | 50.8                |                    | 2.7                 |                    | 53.6                   |                       |
| ENSG00000137462 | TLR2      | 0.73                |                    | -0.02               |                    | 53.4                |                    | 0.0                 |                    | 53.4                   |                       |
| ENSG00000122025 | FLT3      | 0.64                |                    | -0.35               |                    | 40.9                |                    | 12.4                |                    | 53.2                   |                       |
| ENSG00000196576 | PLXNB2    | 0.72                |                    | 0.10                |                    | 52.1                |                    | 0.9                 |                    | 53.1                   |                       |
| ENSG00000204472 | AIF1      | 0.73                |                    | 0.04                |                    | 52.9                |                    | 0.1                 |                    | 53.0                   |                       |
| ENSG00000160712 | IL6R      | 0.72                |                    | -0.09               |                    | 52.1                |                    | 0.7                 |                    | 52.9                   |                       |
| ENSG00000158517 | NCF1      | 0.49                |                    | 0.54                |                    | 24.0                |                    | 28.8                |                    | 52.8                   |                       |
| ENSG00000064225 | ST3GAL6   | 0.45                |                    | -0.57               |                    | 20.6                |                    | 32.2                |                    | 52.8                   |                       |
| ENSG00000008394 | MGST1     | 0.70                |                    | -0.17               |                    | 49.6                |                    | 3.0                 |                    | 52.6                   |                       |
| ENSG00000187800 | PEAR1     | -0.67               |                    | -0.26               |                    | 45.3                |                    | 6.9                 |                    | 52.2                   |                       |
| ENSG00000196126 | HLA-DRB1  | 0.72                |                    | -0.07               |                    | 51.7                |                    | 0.5                 |                    | 52.2                   |                       |
| ENSG00000121316 | PLBD1     | 0.72                |                    | -0.06               |                    | 51.6                |                    | 0.4                 |                    | 52.0                   |                       |
| ENSG00000139970 | RTN1      | 0.72                |                    | -0.05               |                    | 51.2                |                    | 0.2                 |                    | 51.4                   |                       |
| ENSG00000116990 | MYCL1     | 0.69                |                    | 0.19                |                    | 47.7                |                    | 3.6                 |                    | 51.3                   |                       |
| ENSG00000111729 | CLEC4A    | 0.70                |                    | -0.13               |                    | 49.3                |                    | 1.8                 |                    | 51.1                   |                       |
| ENSG00000163625 | WDFY3     | 0.71                |                    | 0.10                |                    | 49.9                |                    | 1.0                 |                    | 50.9                   |                       |
| ENSG00000198734 | F5        | 0.71                |                    | 0.09                |                    | 50.1                |                    | 0.8                 |                    | 50.9                   |                       |
| ENSG00000205730 | ITPRIPL2  | 0.70                |                    | 0.13                |                    | 49.1                |                    | 1.7                 |                    | 50.8                   |                       |

| Gene ID         | Gene Name  | G1<br>(SV-<br>AS03) | G1<br>(SV-<br>PBS) | G2<br>(SV-<br>AS03) | G2<br>(SV-<br>PBS) | V1<br>(SV-<br>AS03) | V1<br>(SV-<br>PBS) | V2<br>(SV-<br>AS03) | V2<br>(SV-<br>PBS) | V1+V2<br>(SV-<br>AS03) | V1+V2<br>(SV-<br>PBS) |
|-----------------|------------|---------------------|--------------------|---------------------|--------------------|---------------------|--------------------|---------------------|--------------------|------------------------|-----------------------|
| ENSG00000106034 | C7orf58    | 0.71                |                    | -0.04               |                    | 50.5                |                    | 0.2                 |                    | 50.7                   |                       |
| ENSG00000101439 | CST3       | 0.71                |                    | -0.02               |                    | 50.6                |                    | 0.0                 |                    | 50.7                   |                       |
| ENSG00000119862 | AC008074.1 | -0.69               |                    | -0.17               |                    | 47.8                |                    | 2.8                 |                    | 50.6                   |                       |
| ENSG00000170458 | CD14       | 0.70                |                    | 0.10                |                    | 49.6                |                    | 0.9                 |                    | 50.5                   |                       |
| ENSG00000171105 | INSR       | 0.65                |                    | -0.28               |                    | 42.4                |                    | 8.1                 |                    | 50.5                   |                       |
| ENSG00000140044 | JDP2       | 0.64                |                    | 0.31                |                    | 40.6                |                    | 9.8                 |                    | 50.4                   |                       |
| ENSG00000135363 | LMO2       | 0.70                |                    | -0.10               |                    | 49.3                |                    | 1.1                 |                    | 50.4                   |                       |
| ENSG00000105967 | TFEC       | 0.71                |                    | -0.02               |                    | 50.3                |                    | 0.0                 |                    | 50.4                   |                       |
| ENSG00000179104 | TMTC2      | 0.61                |                    | 0.36                |                    | 37.1                |                    | 13.0                |                    | 50.1                   |                       |
| ENSG00000134243 | SORT1      | 0.70                |                    | -0.10               |                    | 48.5                |                    | 1.0                 |                    | 49.5                   |                       |
| ENSG00000155465 | SLC7A7     | 0.69                |                    | 0.11                |                    | 48.1                |                    | 1.3                 |                    | 49.5                   |                       |
| ENSG00000088726 | TMEM40     | -0.70               |                    | -0.09               |                    | 48.6                |                    | 0.9                 |                    | 49.4                   |                       |
| ENSG00000158481 | CD1C       | 0.54                |                    | -0.45               |                    | 29.1                |                    | 20.1                |                    | 49.2                   |                       |
| ENSG00000114013 | CD86       | 0.70                |                    | 0.05                |                    | 48.9                |                    | 0.2                 |                    | 49.1                   |                       |
| ENSG00000196209 | SIRPB2     | 0.67                |                    | -0.22               |                    | 44.4                |                    | 4.7                 |                    | 49.1                   |                       |
| ENSG00000136830 | FAM129B    | 0.69                |                    | 0.09                |                    | 48.2                |                    | 0.8                 |                    | 49.0                   |                       |
| ENSG00000143546 | S100A8     | 0.69                |                    | -0.07               |                    | 48.1                |                    | 0.5                 |                    | 48.6                   |                       |
| ENSG00000115828 | QPCT       | 0.59                |                    | 0.37                |                    | 34.3                |                    | 14.0                |                    | 48.4                   |                       |
| ENSG00000104974 | LILRA1     | 0.69                |                    | -0.04               |                    | 48.2                |                    | 0.1                 |                    | 48.3                   |                       |
| ENSG00000146192 | FGD2       | 0.67                |                    | -0.15               |                    | 45.0                |                    | 2.2                 |                    | 47.1                   |                       |
| ENSG00000163737 | PF4        | -0.64               |                    | -0.24               |                    | 41.6                |                    | 5.5                 |                    | 47.1                   |                       |
| ENSG00000163220 | S100A9     | 0.68                |                    | 0.03                |                    | 46.7                |                    | 0.1                 |                    | 46.9                   |                       |
| ENSG00000085733 | CTTN       | -0.66               |                    | -0.18               |                    | 43.5                |                    | 3.3                 |                    | 46.8                   |                       |
| ENSG00000109743 | BST1       | 0.66                |                    | 0.17                |                    | 44.0                |                    | 2.7                 |                    | 46.7                   |                       |
| ENSG00000103811 | CTSH       | 0.67                |                    | 0.12                |                    | 45.2                |                    | 1.5                 |                    | 46.7                   |                       |
| ENSG00000090382 | LYZ        | 0.68                |                    | -0.03               |                    | 46.5                |                    | 0.1                 |                    | 46.6                   |                       |
| ENSG00000012779 | ALOX5      | 0.68                |                    | -0.03               |                    | 46.4                |                    | 0.1                 |                    | 46.5                   |                       |
| ENSG00000111275 | ALDH2      | 0.68                |                    | 0.08                |                    | 45.7                |                    | 0.7                 |                    | 46.4                   |                       |
| ENSG00000175489 | LRRC25     | 0.68                |                    | 0.06                |                    | 45.8                |                    | 0.3                 |                    | 46.1                   |                       |
| ENSG00000184702 | SEPT5      | -0.67               |                    | -0.11               |                    | 44.8                |                    | 1.3                 |                    | 46.1                   |                       |
| ENSG00000138119 | MYOF       | 0.66                |                    | 0.14                |                    | 44.1                |                    | 2.0                 |                    | 46.1                   |                       |
| ENSG00000100365 | NCF4       | 0.56                |                    | 0.38                |                    | 31.3                |                    | 14.7                |                    | 46.0                   |                       |
| ENSG00000158473 | CD1D       | 0.67                |                    | -0.06               |                    | 45.5                |                    | 0.4                 |                    | 45.9                   |                       |
| ENSG00000160593 | AMICA1     | 0.62                |                    | -0.24               |                    | 38.9                |                    | 6.0                 |                    | 44.9                   |                       |
| ENSG00000168497 | SDPR       | -0.65               |                    | -0.17               |                    | 42.1                |                    | 2.8                 |                    | 44.9                   |                       |
| ENSG00000006534 | ALDH3B1    | 0.67                |                    | 0.05                |                    | 44.4                |                    | 0.3                 |                    | 44.7                   |                       |
| ENSG00000184060 | ADAP2      | 0.51                |                    | 0.43                |                    | 25.9                |                    | 18.7                |                    | 44.6                   |                       |
| ENSG00000104870 | FCGRT      | 0.67                |                    | 0.04                |                    | 44.2                |                    | 0.1                 |                    | 44.4                   |                       |
| ENSG00000124762 | CDKN1A     | -0.66               |                    | -0.08               |                    | 43.7                |                    | 0.6                 |                    | 44.3                   |                       |
| ENSG00000132205 | EMILIN2    | 0.65                |                    | 0.13                |                    | 42.3                |                    | 1.7                 |                    | 44.0                   |                       |
| ENSG00000154611 | PSMA8      | -0.48               |                    | -0.46               |                    | 22.8                |                    | 21.1                |                    | 43.8                   |                       |
| ENSG00000140749 | IGSF6      | 0.64                |                    | 0.17                |                    | 40.8                |                    | 2.8                 |                    | 43.6                   |                       |
| ENSG00000121552 | CSTA       | 0.64                |                    | -0.16               |                    | 41.0                |                    | 2.5                 |                    | 43.5                   |                       |
| ENSG00000136869 | TLR4       | 0.66                |                    | -0.06               |                    | 43.0                |                    | 0.3                 |                    | 43.4                   |                       |
| ENSG00000101162 | TUBB1      | -0.65               |                    | -0.11               |                    | 42.0                |                    | 1.3                 |                    | 43.3                   |                       |
| ENSG00000159128 | IFNGR2     | 0.64                |                    | -0.15               |                    | 41.1                |                    | 2.2                 |                    | 43.3                   |                       |
| ENSG00000170017 | ALCAM      | 0.65                |                    | -0.06               |                    | 42.5                |                    | 0.4                 |                    | 42.9                   |                       |
| ENSG00000035862 | TIMP2      | 0.65                |                    | -0.08               |                    | 42.3                |                    | 0.6                 |                    | 42.9                   |                       |
| ENSG00000134955 | SLC37A2    | 0.64                |                    | -0.13               |                    | 41.1                |                    | 1.7                 |                    | 42.8                   |                       |
| ENSG00000109436 | TBC1D9     | 0.65                |                    | 0.08                |                    | 42.0                |                    | 0.6                 |                    | 42.6                   |                       |
| ENSG00000140090 | SLC24A4    | 0.54                |                    | -0.37               |                    | 28.8                |                    | 13.7                |                    | 42.5                   |                       |

| Gene ID         | Gene Name | G1<br>(SV-<br>AS03) | G1<br>(SV-<br>PBS) | G2<br>(SV-<br>AS03) | G2<br>(SV-<br>PBS) | V1<br>(SV-<br>AS03) | V1<br>(SV-<br>PBS) | V2<br>(SV-<br>AS03) | V2<br>(SV-<br>PBS) | V1+V2<br>(SV-<br>AS03) | V1+V2<br>(SV-<br>PBS) |
|-----------------|-----------|---------------------|--------------------|---------------------|--------------------|---------------------|--------------------|---------------------|--------------------|------------------------|-----------------------|
| ENSG00000149564 | ESAM      | -0.64               |                    | -0.12               |                    | 41.0                |                    | 1.5                 |                    | 42.5                   |                       |
| ENSG00000197629 | MPEG1     | 0.65                |                    | 0.09                |                    | 41.6                |                    | 0.9                 |                    | 42.5                   |                       |
| ENSG00000049323 | LTBP1     | -0.64               |                    | -0.12               |                    | 40.9                |                    | 1.4                 |                    | 42.3                   |                       |
| ENSG00000100077 | ADRBK2    | 0.63                |                    | -0.16               |                    | 39.7                |                    | 2.5                 |                    | 42.2                   |                       |
| ENSG00000187164 | KIAA1598  | 0.65                |                    | -0.03               |                    | 42.0                |                    | 0.1                 |                    | 42.1                   |                       |
| ENSG00000186074 | CD300LF   | 0.64                |                    | 0.13                |                    | 40.5                |                    | 1.6                 |                    | 42.1                   |                       |
| ENSG00000160883 | HK3       | 0.64                |                    | 0.09                |                    | 41.3                |                    | 0.7                 |                    | 42.0                   |                       |
| ENSG00000198478 | SH3BGRL2  | -0.64               |                    | -0.12               |                    | 40.5                |                    | 1.4                 |                    | 41.9                   |                       |
| ENSG00000168389 | MFSD2A    | 0.64                |                    | -0.12               |                    | 40.4                |                    | 1.5                 |                    | 41.9                   |                       |
| ENSG00000167207 | NOD2      | 0.63                |                    | 0.12                |                    | 40.2                |                    | 1.3                 |                    | 41.5                   |                       |
| ENSG00000239998 | LILRA2    | 0.59                |                    | -0.24               |                    | 35.3                |                    | 5.8                 |                    | 41.1                   |                       |
| ENSG00000018280 | SLC11A1   | 0.63                |                    | 0.12                |                    | 39.6                |                    | 1.4                 |                    | 41.1                   |                       |
| ENSG00000171611 | PTCRA     | -0.61               |                    | -0.20               |                    | 37.0                |                    | 4.0                 |                    | 41.0                   |                       |
| ENSG00000029534 | ANK1      | -0.61               |                    | -0.20               |                    | 36.8                |                    | 4.2                 |                    | 41.0                   |                       |
| ENSG00000163736 | PPBP      | -0.62               |                    | -0.17               |                    | 38.1                |                    | 2.8                 |                    | 40.9                   |                       |
| ENSG00000014914 | MTMR11    | 0.64                |                    | 0.04                |                    | 40.6                |                    | 0.1                 |                    | 40.8                   |                       |
| ENSG00000105383 | CD33      | 0.63                |                    | -0.09               |                    | 39.7                |                    | 0.8                 |                    | 40.5                   |                       |
| ENSG00000155254 | MARVELD1  | 0.64                |                    | 0.01                |                    | 40.3                |                    | 0.0                 |                    | 40.3                   |                       |
| ENSG00000169704 | GP9       | -0.62               |                    | -0.12               |                    | 38.8                |                    | 1.5                 |                    | 40.3                   |                       |
| ENSG00000114812 | VIPR1     | 0.62                |                    | -0.13               |                    | 38.7                |                    | 1.6                 |                    | 40.3                   |                       |
| ENSG00000187116 | LILRA5    | 0.63                |                    | -0.04               |                    | 39.1                |                    | 0.1                 |                    | 39.2                   |                       |
| ENSG00000163803 | PLB1      | 0.62                |                    | 0.09                |                    | 38.3                |                    | 0.9                 |                    | 39.1                   |                       |
| ENSG00000163221 | S100A12   | 0.62                |                    | 0.06                |                    | 38.7                |                    | 0.4                 |                    | 39.1                   |                       |
| ENSG00000053918 | KCNQ1     | 0.62                |                    | 0.09                |                    | 38.0                |                    | 0.8                 |                    | 38.8                   |                       |
| ENSG00000117115 | PADI2     | 0.62                |                    | 0.03                |                    | 38.5                |                    | 0.1                 |                    | 38.5                   |                       |
| ENSG00000133246 | PRAM1     | 0.57                |                    | -0.24               |                    | 32.8                |                    | 5.6                 |                    | 38.4                   |                       |
| ENSG00000204103 | MAFB      | 0.49                |                    | 0.38                |                    | 23.6                |                    | 14.8                |                    | 38.4                   |                       |
| ENSG00000171051 | FPR1      | 0.50                |                    | 0.36                |                    | 25.4                |                    | 12.9                |                    | 38.3                   |                       |
| ENSG00000145936 | KCNMB1    | 0.02                |                    | 0.62                |                    | 0.0                 |                    | 38.3                |                    | 38.3                   |                       |
| ENSG00000186818 | LILRB4    | 0.62                |                    | -0.02               |                    | 37.9                |                    | 0.0                 |                    | 38.0                   |                       |
| ENSG00000132514 | CLEC10A   | 0.61                |                    | -0.07               |                    | 37.4                |                    | 0.5                 |                    | 37.9                   |                       |
| ENSG00000183023 | SLC8A1    | 0.50                |                    | 0.36                |                    | 25.0                |                    | 12.8                |                    | 37.9                   |                       |
| ENSG00000157240 | FZD1      | 0.61                |                    | -0.00               |                    | 37.6                |                    | 0.0                 |                    | 37.6                   |                       |
| ENSG00000157445 | CACNA2D3  | 0.52                |                    | -0.32               |                    | 26.8                |                    | 10.3                |                    | 37.1                   |                       |
| ENSG00000180340 | FZD2      | 0.61                |                    | 0.04                |                    | 36.8                |                    | 0.1                 |                    | 36.9                   |                       |
| ENSG00000113140 | SPARC     | -0.60               |                    | -0.12               |                    | 35.5                |                    | 1.4                 |                    | 36.9                   |                       |
| ENSG00000168913 | ENHO      | 0.53                |                    | 0.30                |                    | 28.0                |                    | 8.8                 |                    | 36.8                   |                       |
| ENSG00000188536 | HBA2      | -0.51               |                    | -0.32               |                    | 26.5                |                    | 10.0                |                    | 36.5                   |                       |
| ENSG00000229754 | CXCR2P1   | -0.57               |                    | -0.19               |                    | 32.5                |                    | 3.7                 |                    | 36.2                   |                       |
| ENSG00000198848 | CES1      | 0.60                |                    | -0.04               |                    | 35.9                |                    | 0.2                 |                    | 36.0                   |                       |
| ENSG00000120885 | CLU       | -0.58               |                    | -0.13               |                    | 34.2                |                    | 1.7                 |                    | 35.9                   |                       |
| ENSG00000075223 | SEMA3C    | 0.56                |                    | -0.22               |                    | 30.9                |                    | 4.7                 |                    | 35.6                   |                       |
| ENSG00000172322 | CLEC12A   | 0.59                |                    | -0.01               |                    | 35.1                |                    | 0.0                 |                    | 35.2                   |                       |
| ENSG00000154237 | LRRK1     | 0.56                |                    | 0.20                |                    | 31.2                |                    | 3.9                 |                    | 35.1                   |                       |
| ENSG00000113749 | HRH2      | 0.59                |                    | 0.06                |                    | 34.6                |                    | 0.3                 |                    | 34.9                   |                       |
| ENSG00000206172 | HBA1      | -0.44               |                    | -0.39               |                    | 19.7                |                    | 15.0                |                    | 34.7                   |                       |
| ENSG00000164181 | ELOVL7    | -0.58               |                    | 0.04                |                    | 34.2                |                    | 0.2                 |                    | 34.4                   |                       |
| ENSG00000244734 | HBB       | -0.55               |                    | -0.21               |                    | 30.0                |                    | 4.3                 |                    | 34.4                   |                       |
| ENSG00000138678 | AGPAT9    | 0.53                |                    | -0.25               |                    | 27.7                |                    | 6.4                 |                    | 34.2                   |                       |
| ENSG00000187554 | TLR5      | 0.57                |                    | 0.13                |                    | 32.3                |                    | 1.8                 |                    | 34.1                   |                       |
| ENSG00000112414 | GPR126    | 0.52                |                    | -0.26               |                    | 27.0                |                    | 6.5                 |                    | 33.5                   |                       |



| Gene ID         | Gene Name     | G1<br>(SV-<br>AS03) | G1<br>(SV-<br>PBS) | G2<br>(SV-<br>AS03) | G2<br>(SV-<br>PBS) | V1<br>(SV-<br>AS03) | V1<br>(SV-<br>PBS) | V2<br>(SV-<br>AS03) | V2<br>(SV-<br>PBS) | V1+V2<br>(SV-<br>AS03) | V1+V2<br>(SV-<br>PBS) |
|-----------------|---------------|---------------------|--------------------|---------------------|--------------------|---------------------|--------------------|---------------------|--------------------|------------------------|-----------------------|
| ENSG00000165178 | NCF1C         | 0.40                |                    | 0.41                |                    | 16.3                |                    | 17.2                |                    | 33.5                   |                       |
| ENSG00000204287 | HLA-DRA       | 0.55                |                    | -0.18               |                    | 30.2                |                    | 3.2                 |                    | 33.4                   |                       |
| ENSG00000136630 | HLX           | 0.17                |                    | -0.55               |                    | 3.0                 |                    | 30.1                |                    | 33.1                   |                       |
| ENSG00000101307 | SIRPB1        | 0.57                |                    | 0.03                |                    | 32.9                |                    | 0.1                 |                    | 33.0                   |                       |
| ENSG00000254415 | SIGLEC14      | 0.40                |                    | -0.40               |                    | 15.7                |                    | 16.2                |                    | 31.8                   |                       |
| ENSG00000166825 | ANPEP         | 0.56                |                    | -0.03               |                    | 31.7                |                    | 0.1                 |                    | 31.8                   |                       |
| ENSG00000108846 | ABCC3         | -0.55               |                    | -0.11               |                    | 30.5                |                    | 1.2                 |                    | 31.7                   |                       |
| ENSG00000115919 | KYNU          | 0.53                |                    | -0.16               |                    | 28.4                |                    | 2.5                 |                    | 31.0                   |                       |
| ENSG00000154146 | NRGN          | -0.52               |                    | -0.18               |                    | 27.1                |                    | 3.4                 |                    | 30.4                   |                       |
| ENSG00000182022 | CHST15        | 0.51                |                    | 0.21                |                    | 25.9                |                    | 4.4                 |                    | 30.3                   |                       |
| ENSG00000164023 | SGMS2         | 0.49                |                    | -0.25               |                    | 23.8                |                    | 6.3                 |                    | 30.1                   |                       |
| ENSG00000173530 | TNFRSF10D     | 0.54                |                    | -0.09               |                    | 29.2                |                    | 0.8                 |                    | 30.0                   |                       |
| ENSG00000011105 | TSPAN9        | -0.52               |                    | -0.17               |                    | 27.1                |                    | 2.9                 |                    | 30.0                   |                       |
| ENSG00000014257 | ACPP          | 0.51                |                    | -0.20               |                    | 25.7                |                    | 3.8                 |                    | 29.5                   |                       |
| ENSG00000101335 | MYL9          | -0.53               |                    | -0.10               |                    | 28.2                |                    | 1.1                 |                    | 29.3                   |                       |
| ENSG00000142552 | RCN3          | 0.54                |                    | 0.03                |                    | 28.9                |                    | 0.1                 |                    | 29.0                   |                       |
| ENSG00000161911 | TREML1        | -0.44               |                    | -0.31               |                    | 18.9                |                    | 9.8                 |                    | 28.8                   |                       |
| ENSG00000104267 | CA2           | -0.48               |                    | -0.22               |                    | 23.4                |                    | 5.0                 |                    | 28.4                   |                       |
| ENSG00000174837 | EMR1          | 0.23                |                    | 0.47                |                    | 5.4                 |                    | 22.5                |                    | 27.9                   |                       |
| ENSG00000185340 | GAS2L1        | -0.45               |                    | -0.28               |                    | 19.9                |                    | 7.9                 |                    | 27.8                   |                       |
| ENSG00000005961 | ITGA2B        | -0.52               |                    | -0.04               |                    | 27.5                |                    | 0.2                 |                    | 27.7                   |                       |
| ENSG00000160013 | PTGIR         | -0.37               |                    | -0.37               |                    | 13.5                |                    | 13.8                |                    | 27.3                   |                       |
| ENSG00000173210 | ABLIM3        | -0.39               |                    | -0.35               |                    | 15.2                |                    | 12.1                |                    | 27.2                   |                       |
| ENSG00000112799 | LY86          | 0.51                |                    | -0.12               |                    | 25.5                |                    | 1.4                 |                    | 26.9                   |                       |
| ENSG00000134256 | CD101         | 0.48                |                    | 0.19                |                    | 23.2                |                    | 3.8                 |                    | 26.9                   |                       |
| ENSG00000075618 | FSCN1         | 0.51                |                    | -0.11               |                    | 25.7                |                    | 1.2                 |                    | 26.8                   |                       |
| ENSG00000082781 | ITGB5         | -0.51               |                    | -0.07               |                    | 26.2                |                    | 0.5                 |                    | 26.7                   |                       |
| ENSG00000251060 | U66061.31     | -0.52               |                    | -0.02               |                    | 26.6                |                    | 0.1                 |                    | 26.7                   |                       |
| ENSG00000136689 | IL1RN         | 0.51                |                    | -0.03               |                    | 26.3                |                    | 0.1                 |                    | 26.4                   |                       |
| ENSG00000020577 | SAMD4A        | 0.27                |                    | 0.44                |                    | 7.1                 |                    | 19.1                |                    | 26.2                   |                       |
| ENSG00000154928 | EPHB1         | -0.09               |                    | 0.50                |                    | 0.7                 |                    | 25.3                |                    | 26.1                   |                       |
| ENSG00000136826 | KLF4          | 0.39                |                    | 0.33                |                    | 15.0                |                    | 11.1                |                    | 26.1                   |                       |
| ENSG00000118515 | SGK1          | 0.34                |                    | 0.38                |                    | 11.4                |                    | 14.6                |                    | 25.9                   |                       |
| ENSG00000114923 | SLC4A3        | 0.37                |                    | -0.35               |                    | 13.4                |                    | 12.5                |                    | 25.9                   |                       |
| ENSG00000182487 | NCF1B         | 0.07                |                    | 0.50                |                    | 0.5                 |                    | 25.3                |                    | 25.8                   |                       |
| ENSG00000105501 | SIGLEC5       | 0.47                |                    | 0.20                |                    | 21.7                |                    | 4.1                 |                    | 25.7                   |                       |
| ENSG00000185758 | CLDN24        | 0.31                |                    | -0.39               |                    | 9.9                 |                    | 15.2                |                    | 25.1                   |                       |
| ENSG00000144677 | CTDSPL        | -0.48               |                    | -0.12               |                    | 23.1                |                    | 1.4                 |                    | 24.5                   |                       |
| ENSG00000120738 | EGR1          | -0.41               |                    | 0.27                |                    | 17.1                |                    | 7.2                 |                    | 24.3                   |                       |
| ENSG00000172037 | LAMB2         | 0.44                |                    | -0.21               |                    | 19.7                |                    | 4.4                 |                    | 24.1                   |                       |
| ENSG00000100504 | PYGL          | 0.48                |                    | -0.09               |                    | 23.0                |                    | 0.8                 |                    | 23.8                   |                       |
| ENSG00000159339 | PADI4         | 0.47                |                    | 0.11                |                    | 22.4                |                    | 1.2                 |                    | 23.6                   |                       |
| ENSG00000136929 | HEMGN         | -0.41               |                    | -0.26               |                    | 16.6                |                    | 6.5                 |                    | 23.1                   |                       |
| ENSG00000166428 | PLD4          | 0.47                |                    | 0.04                |                    | 22.0                |                    | 0.1                 |                    | 22.2                   |                       |
| ENSG00000121807 | CCR2          | 0.47                |                    | 0.05                |                    | 21.7                |                    | 0.3                 |                    | 22.0                   |                       |
| ENSG00000224888 | RP5-1142A6.2  | 0.35                |                    | -0.31               |                    | 12.5                |                    | 9.3                 |                    | 21.8                   |                       |
| ENSG00000134531 | EMP1          | 0.39                |                    | -0.24               |                    | 15.5                |                    | 5.9                 |                    | 21.5                   |                       |
| ENSG00000255197 | RP11-750H9.5  | 0.46                |                    | -0.02               |                    | 21.3                |                    | 0.0                 |                    | 21.3                   |                       |
| ENSG00000146094 | DOK3          | 0.45                |                    | -0.06               |                    | 19.8                |                    | 0.3                 |                    | 20.2                   |                       |
| ENSG00000134061 | CD180         | 0.45                |                    | -0.03               |                    | 19.9                |                    | 0.1                 |                    | 20.0                   |                       |
| ENSG00000103832 | RP5-1086D14.1 | -0.32               |                    | -0.31               |                    | 10.1                |                    | 9.6                 |                    | 19.7                   |                       |

| Gene ID         | Gene Name | G1<br>(SV-<br>AS03) | G1<br>(SV-<br>PBS) | G2<br>(SV-<br>AS03) | G2<br>(SV-<br>PBS) | V1<br>(SV-<br>AS03) | V1<br>(SV-<br>PBS) | V2<br>(SV-<br>AS03) | V2<br>(SV-<br>PBS) | V1+V2<br>(SV-<br>AS03) | V1+V2<br>(SV-<br>PBS) |
|-----------------|-----------|---------------------|--------------------|---------------------|--------------------|---------------------|--------------------|---------------------|--------------------|------------------------|-----------------------|
| ENSG00000203710 | CR1       | 0.23                |                    | 0.37                |                    | 5.3                 |                    | 13.4                |                    | 18.8                   |                       |
| ENSG00000115271 | GCA       | 0.43                |                    | -0.01               |                    | 18.3                |                    | 0.0                 |                    | 18.3                   |                       |
| ENSG00000196735 | HLA-DQA1  | 0.42                |                    | 0.07                |                    | 17.5                |                    | 0.4                 |                    | 17.9                   |                       |
| ENSG00000167642 | SPINT2    | 0.33                |                    | -0.27               |                    | 10.7                |                    | 7.2                 |                    | 17.9                   |                       |
| ENSG00000173262 | SLC2A14   | -0.25               |                    | 0.33                |                    | 6.3                 |                    | 10.7                |                    | 17.0                   |                       |
| ENSG00000131401 | NAPSB     | 0.39                |                    | -0.11               |                    | 15.1                |                    | 1.2                 |                    | 16.3                   |                       |
| ENSG00000179344 | HLA-DQB1  | 0.33                |                    | 0.23                |                    | 10.7                |                    | 5.3                 |                    | 15.9                   |                       |
| ENSG00000142627 | EPHA2     | -0.34               |                    | 0.19                |                    | 11.4                |                    | 3.7                 |                    | 15.1                   |                       |
| ENSG00000171812 | COL8A2    | 0.38                |                    | -0.05               |                    | 14.7                |                    | 0.3                 |                    | 15.0                   |                       |
| ENSG00000104783 | KCNN4     | 0.04                |                    | 0.38                |                    | 0.1                 |                    | 14.4                |                    | 14.5                   |                       |
| ENSG00000111424 | VDR       | 0.31                |                    | 0.20                |                    | 9.9                 |                    | 4.0                 |                    | 13.9                   |                       |
| ENSG00000179639 | FCER1A    | 0.30                |                    | -0.22               |                    | 8.7                 |                    | 4.9                 |                    | 13.6                   |                       |
| ENSG00000082397 | EPB41L3   | 0.32                |                    | -0.16               |                    | 10.5                |                    | 2.7                 |                    | 13.2                   |                       |
| ENSG00000155367 | PPM1J     | -0.36               |                    | -0.03               |                    | 13.1                |                    | 0.1                 |                    | 13.2                   |                       |
| ENSG00000184602 | SNN       | -0.35               |                    | -0.09               |                    | 12.1                |                    | 0.9                 |                    | 13.0                   |                       |
| ENSG00000138449 | SLC40A1   | -0.32               |                    | -0.12               |                    | 10.1                |                    | 1.5                 |                    | 11.7                   |                       |
| ENSG00000165959 | CLMN      | 0.24                |                    | -0.24               |                    | 5.9                 |                    | 5.8                 |                    | 11.7                   |                       |
| ENSG00000149418 | ST14      | 0.34                |                    | -0.04               |                    | 11.4                |                    | 0.1                 |                    | 11.5                   |                       |
| ENSG00000173801 | JUP       | 0.31                |                    | 0.10                |                    | 9.6                 |                    | 0.9                 |                    | 10.6                   |                       |
| ENSG00000120875 | DUSP4     | 0.23                |                    | -0.23               |                    | 5.1                 |                    | 5.3                 |                    | 10.4                   |                       |
| ENSG00000168461 | RAB31     | 0.29                |                    | -0.10               |                    | 8.6                 |                    | 1.0                 |                    | 9.6                    |                       |
| ENSG00000127831 | VIL1      | -0.30               |                    | -0.05               |                    | 9.3                 |                    | 0.2                 |                    | 9.5                    |                       |
| ENSG00000119866 | BCL11A    | 0.29                |                    | 0.08                |                    | 8.5                 |                    | 0.7                 |                    | 9.2                    |                       |
| ENSG00000178038 | ALS2CL    | 0.21                |                    | 0.20                |                    | 4.2                 |                    | 4.0                 |                    | 8.2                    |                       |
| ENSG00000129993 | CBFA2T3   | 0.27                |                    | -0.08               |                    | 7.5                 |                    | 0.7                 |                    | 8.1                    |                       |
| ENSG00000197766 | CFD       | -0.14               |                    | 0.24                |                    | 1.9                 |                    | 5.6                 |                    | 7.5                    |                       |
| ENSG00000123405 | NFE2      | -0.25               |                    | -0.06               |                    | 6.4                 |                    | 0.3                 |                    | 6.7                    |                       |
| ENSG00000175857 | GAPT      | 0.24                |                    | 0.05                |                    | 5.8                 |                    | 0.2                 |                    | 6.0                    |                       |
| ENSG00000141447 | OSBPL1A   | 0.10                |                    | 0.21                |                    | 1.0                 |                    | 4.2                 |                    | 5.2                    |                       |
| ENSG00000124491 | F13A1     | -0.22               |                    | -0.02               |                    | 4.8                 |                    | 0.0                 |                    | 4.8                    |                       |
| ENSG00000072422 | RHOBTB1   | -0.21               |                    | -0.04               |                    | 4.5                 |                    | 0.2                 |                    | 4.7                    |                       |
| ENSG00000205639 | MFSD2B    | -0.09               |                    | 0.19                |                    | 0.8                 |                    | 3.7                 |                    | 4.5                    |                       |
| ENSG00000118508 | RAB32     | 0.15                |                    | -0.15               |                    | 2.2                 |                    | 2.2                 |                    | 4.4                    |                       |
| ENSG00000255833 | TIFAB     | -0.17               |                    | -0.11               |                    | 3.0                 |                    | 1.2                 |                    | 4.2                    |                       |
| ENSG00000108405 | P2RX1     | -0.17               |                    | 0.08                |                    | 2.9                 |                    | 0.7                 |                    | 3.7                    |                       |
| ENSG00000140287 | HDC       | -0.17               |                    | -0.07               |                    | 2.9                 |                    | 0.4                 |                    | 3.3                    |                       |
| ENSG00000060138 | CSDA      | 0.14                |                    | -0.11               |                    | 1.9                 |                    | 1.1                 |                    | 3.0                    |                       |
| ENSG00000237541 | HLA-DQA2  | 0.15                |                    | 0.08                |                    | 2.2                 |                    | 0.7                 |                    | 2.9                    |                       |
| ENSG00000004799 | PDK4      | -0.04               |                    | 0.07                |                    | 0.2                 |                    | 0.5                 |                    | 0.6                    |                       |

**Table A150:** Canonical loadings and explained variance (RNA-Seq, NK-cells, Day 28, Gene variables). Gene variables with at least 25% of explained variance for the first two canonical variates are listed. GX: canonical loadings for canonical variate X, VX: % explained variance for canonical variate X, V1+V2: total % explained variance for both canonical variates. Values for CCA results with a poor cross validation score (< 0.70) are left blank. Sorted by maximum explained variance across treatments (V1+V2).

| IMO Vari-<br>able | IMO Variable Name  | I1<br>(SV-<br>AS03) | I1<br>(SV-<br>PBS) | I2<br>(SV-<br>AS03) | I2<br>(SV-<br>PBS) | V1<br>(SV-<br>AS03) | V1<br>(SV-<br>PBS) | V2<br>(SV-<br>AS03) | V2<br>(SV-<br>PBS) | V1+V2<br>(SV-<br>AS03) | V1+V2<br>(SV-<br>PBS) |
|-------------------|--------------------|---------------------|--------------------|---------------------|--------------------|---------------------|--------------------|---------------------|--------------------|------------------------|-----------------------|
| IL-12p70          | Interleukin-12 p70 | -0.93               |                    | 0.30                |                    | 86.7                |                    | 9.1                 |                    | 95.7                   |                       |

| IMO Variable   | IMO Variable Name                   | I1<br>(SV-<br>AS03) | I1<br>(SV-<br>PBS) | I2<br>(SV-<br>AS03) | I2<br>(SV-<br>PBS) | V1<br>(SV-<br>AS03) | V1<br>(SV-<br>PBS) | V2<br>(SV-<br>AS03) | V2<br>(SV-<br>PBS) | V1+V2<br>(SV-<br>AS03) | V1+V2<br>(SV-<br>PBS) |
|----------------|-------------------------------------|---------------------|--------------------|---------------------|--------------------|---------------------|--------------------|---------------------|--------------------|------------------------|-----------------------|
| Nt             | Microneutralization inhibition      | 0.70                |                    | 0.61                |                    | 49.5                |                    | 37.4                |                    | 86.8                   |                       |
| HAI            | Hemagglutination inhibition         | 0.64                |                    | 0.66                |                    | 40.7                |                    | 44.0                |                    | 84.7                   |                       |
| Eotaxin-1      | Eotaxin-1                           | -0.22               |                    | 0.85                |                    | 4.8                 |                    | 71.5                |                    | 76.3                   |                       |
| IL-6           | Interleukin-6                       | -0.82               |                    | -0.18               |                    | 66.9                |                    | 3.4                 |                    | 70.3                   |                       |
| IL-10          | Interleukin-10                      | -0.28               |                    | 0.79                |                    | 8.0                 |                    | 61.9                |                    | 70.0                   |                       |
| IL-8           | Interleukin-8                       | -0.38               |                    | 0.74                |                    | 14.4                |                    | 54.3                |                    | 68.6                   |                       |
| IP-10          | Interferon gamma-induced protein 10 | 0.55                |                    | 0.50                |                    | 30.1                |                    | 24.5                |                    | 54.6                   |                       |
| TNF            | Tumor necrosis factors              | -0.45               |                    | 0.53                |                    | 19.9                |                    | 27.7                |                    | 47.6                   |                       |
| MCP-1          | Monocyte chemoattractant protein-1  | -0.48               |                    | 0.40                |                    | 23.4                |                    | 15.8                |                    | 39.2                   |                       |
| RANTES         | Chemokine (C-C motif) ligand 5      | -0.34               |                    | 0.52                |                    | 11.3                |                    | 27.4                |                    | 38.7                   |                       |
| IL-1 $\beta$   | Interleukin-1 beta                  | -0.37               |                    | 0.33                |                    | 13.6                |                    | 11.2                |                    | 24.8                   |                       |
| MIP-1 $\alpha$ | Macrophage inflammatory protein     | -0.11               |                    | -0.48               |                    | 1.2                 |                    | 23.0                |                    | 24.2                   |                       |
| IFN- $\gamma$  | Interferon gamma                    | 0.26                |                    | 0.32                |                    | 6.9                 |                    | 10.4                |                    | 17.3                   |                       |

**Table A151:** Canonical loadings and explained variance (RNA-Seq, NK-cells, Day 28, IMO variables). IMO variables with at least 25% of explained variance for the first two canonical variates are listed. GX: canonical loadings for canonical variate X, VX: % explained variance for canonical variate X, V1+V2: total % explained variance for both canonical variates. Values for CCA results with a poor cross validation score ( $< 0.70$ ) are left blank. Sorted by maximum explained variance across treatments (V1+V2).

| Gene ID         | Gene Name | G1<br>(SV-<br>AS03) | G1<br>(SV-<br>PBS) | G2<br>(SV-<br>AS03) | G2<br>(SV-<br>PBS) | V1<br>(SV-<br>AS03) | V1<br>(SV-<br>PBS) | V2<br>(SV-<br>AS03) | V2<br>(SV-<br>PBS) | V1+V2<br>(SV-<br>AS03) | V1+V2<br>(SV-<br>PBS) |
|-----------------|-----------|---------------------|--------------------|---------------------|--------------------|---------------------|--------------------|---------------------|--------------------|------------------------|-----------------------|
| ENSG00000163563 | MNDA      | 0.62                |                    | 0.77                |                    | 38.2                |                    | 59.4                |                    | 97.5                   |                       |
| ENSG00000117228 | GBP1      | -0.85               |                    | 0.49                |                    | 72.6                |                    | 23.8                |                    | 96.3                   |                       |
| ENSG00000156587 | UBE2L6    | -0.78               |                    | 0.60                |                    | 60.1                |                    | 35.9                |                    | 96.1                   |                       |
| ENSG00000025708 | TYMP      | -0.78               |                    | 0.58                |                    | 61.3                |                    | 33.5                |                    | 94.8                   |                       |
| ENSG00000133106 | EPST11    | -0.81               |                    | 0.54                |                    | 65.1                |                    | 29.6                |                    | 94.7                   |                       |
| ENSG00000138496 | PARP9     | -0.84               |                    | 0.48                |                    | 71.1                |                    | 23.3                |                    | 94.4                   |                       |
| ENSG00000102524 | TNFSF13B  | -0.52               |                    | 0.82                |                    | 27.1                |                    | 66.6                |                    | 93.7                   |                       |
| ENSG00000162654 | GBP4      | -0.81               |                    | 0.53                |                    | 65.3                |                    | 28.2                |                    | 93.5                   |                       |
| ENSG00000163220 | S100A9    | 0.62                |                    | 0.74                |                    | 38.2                |                    | 55.1                |                    | 93.3                   |                       |
| ENSG00000177409 | SAMD9L    | -0.86               |                    | 0.45                |                    | 73.1                |                    | 20.1                |                    | 93.2                   |                       |
| ENSG00000162645 | GBP2      | -0.83               |                    | 0.49                |                    | 69.4                |                    | 23.7                |                    | 93.1                   |                       |
| ENSG00000244734 | HBB       | 0.96                |                    | 0.04                |                    | 91.8                |                    | 0.1                 |                    | 92.0                   |                       |
| ENSG00000010030 | ETV7      | -0.90               |                    | 0.33                |                    | 81.2                |                    | 10.7                |                    | 91.8                   |                       |
| ENSG00000115415 | STAT1     | -0.73               |                    | 0.61                |                    | 54.0                |                    | 37.7                |                    | 91.7                   |                       |
| ENSG00000132530 | XAF1      | -0.82               |                    | 0.48                |                    | 68.0                |                    | 22.8                |                    | 90.9                   |                       |
| ENSG00000225492 | GBP1P1    | -0.83               |                    | 0.47                |                    | 68.1                |                    | 22.5                |                    | 90.6                   |                       |
| ENSG00000089127 | OAS1      | -0.84               |                    | 0.44                |                    | 70.8                |                    | 19.5                |                    | 90.3                   |                       |
| ENSG00000184371 | CSF1      | -0.84               |                    | 0.44                |                    | 71.0                |                    | 19.2                |                    | 90.2                   |                       |
| ENSG00000134326 | CMPK2     | -0.91               |                    | 0.27                |                    | 82.3                |                    | 7.5                 |                    | 89.8                   |                       |
| ENSG00000171051 | FPR1      | 0.46                |                    | 0.82                |                    | 20.9                |                    | 67.9                |                    | 88.8                   |                       |
| ENSG00000154451 | GBP5      | -0.82               |                    | 0.46                |                    | 67.5                |                    | 21.1                |                    | 88.5                   |                       |
| ENSG00000185499 | MUC1      | -0.60               |                    | 0.70                |                    | 36.4                |                    | 49.4                |                    | 85.9                   |                       |
| ENSG00000163840 | DTX3L     | -0.84               |                    | 0.39                |                    | 70.1                |                    | 15.3                |                    | 85.4                   |                       |
| ENSG00000143546 | S100A8    | 0.62                |                    | 0.69                |                    | 38.1                |                    | 47.2                |                    | 85.3                   |                       |
| ENSG00000116663 | FBXO6     | -0.76               |                    | 0.51                |                    | 58.0                |                    | 25.9                |                    | 84.0                   |                       |
| ENSG00000125347 | IRF1      | -0.69               |                    | 0.59                |                    | 48.3                |                    | 34.9                |                    | 83.2                   |                       |
| ENSG00000221963 | APOL6     | -0.80               |                    | 0.42                |                    | 64.5                |                    | 17.7                |                    | 82.2                   |                       |

| Gene ID         | Gene Name         | G1<br>(SV-<br>AS03) | G1<br>(SV-<br>PBS) | G2<br>(SV-<br>AS03) | G2<br>(SV-<br>PBS) | V1<br>(SV-<br>AS03) | V1<br>(SV-<br>PBS) | V2<br>(SV-<br>AS03) | V2<br>(SV-<br>PBS) | V1+V2<br>(SV-<br>AS03) | V1+V2<br>(SV-<br>PBS) |
|-----------------|-------------------|---------------------|--------------------|---------------------|--------------------|---------------------|--------------------|---------------------|--------------------|------------------------|-----------------------|
| ENSG00000069399 | BCL3              | -0.86               |                    | 0.25                |                    | 74.8                |                    | 6.4                 |                    | 81.2                   |                       |
| ENSG00000121380 | BCL2L14           | -0.89               |                    | 0.11                |                    | 78.8                |                    | 1.1                 |                    | 80.0                   |                       |
| ENSG00000137959 | IFI44L            | -0.73               |                    | 0.51                |                    | 53.5                |                    | 25.6                |                    | 79.1                   |                       |
| ENSG00000247275 | AL160008.1        | -0.85               |                    | 0.24                |                    | 72.9                |                    | 5.7                 |                    | 78.6                   |                       |
| ENSG00000087237 | CETP              | -0.71               |                    | 0.52                |                    | 51.0                |                    | 26.9                |                    | 77.9                   |                       |
| ENSG00000119917 | IFIT3             | -0.75               |                    | 0.47                |                    | 55.5                |                    | 22.1                |                    | 77.7                   |                       |
| ENSG00000020577 | SAMD4A            | -0.82               |                    | 0.33                |                    | 66.7                |                    | 10.7                |                    | 77.4                   |                       |
| ENSG00000090339 | ICAM1             | -0.68               |                    | 0.55                |                    | 45.9                |                    | 30.7                |                    | 76.6                   |                       |
| ENSG00000176788 | BASP1             | 0.72                |                    | 0.49                |                    | 51.8                |                    | 24.1                |                    | 75.9                   |                       |
| ENSG00000134321 | RSAD2             | -0.70               |                    | 0.52                |                    | 48.8                |                    | 26.6                |                    | 75.4                   |                       |
| ENSG00000101336 | HCK               | 0.53                |                    | 0.68                |                    | 28.5                |                    | 46.7                |                    | 75.2                   |                       |
| ENSG00000166825 | ANPEP             | 0.54                |                    | 0.68                |                    | 28.8                |                    | 46.1                |                    | 74.9                   |                       |
| ENSG00000078081 | LAMP3             | -0.69               |                    | 0.52                |                    | 47.0                |                    | 27.4                |                    | 74.5                   |                       |
| ENSG00000162747 | FCGR3B            | 0.52                |                    | 0.67                |                    | 27.2                |                    | 45.1                |                    | 72.3                   |                       |
| ENSG00000173535 | TNFRSF10C         | 0.58                |                    | 0.61                |                    | 33.1                |                    | 37.6                |                    | 70.7                   |                       |
| ENSG00000214872 | SMTNL1            | -0.78               |                    | 0.25                |                    | 61.3                |                    | 6.4                 |                    | 67.8                   |                       |
| ENSG00000103569 | AQP9              | 0.54                |                    | 0.61                |                    | 29.7                |                    | 36.7                |                    | 66.3                   |                       |
| ENSG00000125462 | C1orf61           | -0.67               |                    | 0.46                |                    | 45.1                |                    | 20.9                |                    | 66.0                   |                       |
| ENSG00000216490 | IFI30             | -0.70               |                    | 0.34                |                    | 48.3                |                    | 11.7                |                    | 60.0                   |                       |
| ENSG00000140968 | IRF8              | -0.65               |                    | 0.41                |                    | 42.5                |                    | 17.0                |                    | 59.5                   |                       |
| ENSG00000097021 | ACOT7             | -0.49               |                    | 0.56                |                    | 24.0                |                    | 30.8                |                    | 54.8                   |                       |
| ENSG00000143226 | FCGR2A            | 0.53                |                    | 0.49                |                    | 27.8                |                    | 23.9                |                    | 51.7                   |                       |
| ENSG00000184557 | SOCS3             | -0.69               |                    | 0.19                |                    | 47.7                |                    | 3.5                 |                    | 51.2                   |                       |
| ENSG00000163464 | CXCR1             | 0.38                |                    | 0.57                |                    | 14.6                |                    | 32.6                |                    | 47.3                   |                       |
| ENSG00000161055 | SCGB3A1           | 0.50                |                    | 0.44                |                    | 24.6                |                    | 19.5                |                    | 44.1                   |                       |
| ENSG00000237627 | THA1P             | -0.63               |                    | 0.12                |                    | 39.8                |                    | 1.4                 |                    | 41.1                   |                       |
| ENSG00000225131 | PSME2P2           | -0.50               |                    | 0.15                |                    | 24.8                |                    | 2.2                 |                    | 27.1                   |                       |
| ENSG00000162614 | NEXN              | -0.30               |                    | 0.36                |                    | 9.0                 |                    | 13.1                |                    | 22.1                   |                       |
| ENSG00000189152 | AC007952.1_189152 | 0.31                |                    | -0.35               |                    | 9.5                 |                    | 11.9                |                    | 21.4                   |                       |
| ENSG00000250081 | CTD-2116N20.1     | 0.36                |                    | -0.26               |                    | 13.3                |                    | 6.6                 |                    | 19.9                   |                       |
| ENSG00000145975 | C6orf146          | -0.18               |                    | -0.26               |                    | 3.4                 |                    | 6.6                 |                    | 10.0                   |                       |
| ENSG00000213058 | RP4-765C7.2       | -0.03               |                    | -0.26               |                    | 0.1                 |                    | 6.7                 |                    | 6.8                    |                       |
| ENSG00000253590 | IGLV3-13          | 0.05                |                    | 0.16                |                    | 0.2                 |                    | 2.6                 |                    | 2.8                    |                       |

**Table A152:** Canonical loadings and explained variance (RNA-Seq, T-cells, Day 1, Gene variables). Gene variables with at least 25% of explained variance for the first two canonical variates are listed. GX: canonical loadings for canonical variate X, VX: % explained variance for canonical variate X, V1+V2: total % explained variance for both canonical variates. Values for CCA results with a poor cross validation score (< 0.70) are left blank. Sorted by maximum explained variance across treatments (V1+V2).

| IMO Variable   | IMO Variable Name                   | I1<br>(SV-<br>AS03) | I1<br>(SV-<br>PBS) | I2<br>(SV-<br>AS03) | I2<br>(SV-<br>PBS) | V1<br>(SV-<br>AS03) | V1<br>(SV-<br>PBS) | V2<br>(SV-<br>AS03) | V2<br>(SV-<br>PBS) | V1+V2<br>(SV-<br>AS03) | V1+V2<br>(SV-<br>PBS) |
|----------------|-------------------------------------|---------------------|--------------------|---------------------|--------------------|---------------------|--------------------|---------------------|--------------------|------------------------|-----------------------|
| IP-10          | Interferon gamma-induced protein 10 | -0.85               |                    | 0.44                |                    | 72.5                |                    | 19.3                |                    | 91.9                   |                       |
| MIP-1 $\alpha$ | Macrophage inflammatory protein     | -0.69               |                    | 0.43                |                    | 47.8                |                    | 18.7                |                    | 66.6                   |                       |
| MCP-1          | Monocyte chemoattractant protein-1  | -0.34               |                    | -0.66               |                    | 11.6                |                    | 44.1                |                    | 55.7                   |                       |
| IL-6           | Interleukin-6                       | -0.47               |                    | -0.46               |                    | 22.5                |                    | 21.3                |                    | 43.8                   |                       |
| RANTES         | Chemokine (C-C motif) ligand 5      | -0.57               |                    | -0.02               |                    | 33.0                |                    | 0.0                 |                    | 33.0                   |                       |
| Eotaxin-1      | Eotaxin-1                           | 0.16                |                    | -0.55               |                    | 2.5                 |                    | 29.8                |                    | 32.2                   |                       |
| TNF            | Tumor necrosis factors              | 0.35                |                    | -0.44               |                    | 12.5                |                    | 19.1                |                    | 31.7                   |                       |

| IMO Variable  | IMO Variable Name              | I1<br>(SV-<br>AS03) | I1<br>(SV-<br>PBS) | I2<br>(SV-<br>AS03) | I2<br>(SV-<br>PBS) | V1<br>(SV-<br>AS03) | V1<br>(SV-<br>PBS) | V2<br>(SV-<br>AS03) | V2<br>(SV-<br>PBS) | V1+V2<br>(SV-<br>AS03) | V1+V2<br>(SV-<br>PBS) |
|---------------|--------------------------------|---------------------|--------------------|---------------------|--------------------|---------------------|--------------------|---------------------|--------------------|------------------------|-----------------------|
| IFN- $\gamma$ | Interferon gamma               | 0.46                |                    | -0.05               |                    | 21.2                |                    | 0.3                 |                    | 21.4                   |                       |
| IL-8          | Interleukin-8                  | -0.08               |                    | -0.39               |                    | 0.6                 |                    | 15.4                |                    | 16.1                   |                       |
| IL-10         | Interleukin-10                 | -0.30               |                    | -0.11               |                    | 9.3                 |                    | 1.3                 |                    | 10.6                   |                       |
| IL-1 $\beta$  | Interleukin-1 beta             | -0.30               |                    | -0.00               |                    | 8.7                 |                    | 0.0                 |                    | 8.7                    |                       |
| IL-12p70      | Interleukin-12 p70             | -0.16               |                    | -0.22               |                    | 2.6                 |                    | 4.8                 |                    | 7.4                    |                       |
| Nt            | Microneutralization inhibition | 0.11                |                    | -0.09               |                    | 1.2                 |                    | 0.9                 |                    | 2.1                    |                       |

**Table A153:** Canonical loadings and explained variance (RNA-Seq, T-cells, Day 1, IMO variables). IMO variables with at least 25% of explained variance for the first two canonical variates are listed. GX: canonical loadings for canonical variate X, VX: % explained variance for canonical variate X, V1+V2: total % explained variance for both canonical variates. Values for CCA results with a poor cross validation score (< 0.70) are left blank. Sorted by maximum explained variance across treatments (V1+V2).

| Gene ID         | Gene Name     | G1<br>(SV-<br>AS03) | G1<br>(SV-<br>PBS) | G2<br>(SV-<br>AS03) | G2<br>(SV-<br>PBS) | V1<br>(SV-<br>AS03) | V1<br>(SV-<br>PBS) | V2<br>(SV-<br>AS03) | V2<br>(SV-<br>PBS) | V1+V2<br>(SV-<br>AS03) | V1+V2<br>(SV-<br>PBS) |
|-----------------|---------------|---------------------|--------------------|---------------------|--------------------|---------------------|--------------------|---------------------|--------------------|------------------------|-----------------------|
| ENSG00000171051 | FPR1          | -0.13               | -0.72              | -0.44               | -0.11              | 1.7                 | 51.9               | 19.3                | 1.2                | 21.0                   | 53.1                  |
| ENSG00000185792 | NLRP9         | -0.26               | 0.11               | 0.60                | -0.43              | 6.8                 | 1.1                | 36.3                | 18.8               | 43.1                   | 19.9                  |
| ENSG00000173535 | TNFRSF10C     | 0.31                | -0.42              | -0.10               | -0.42              | 9.4                 | 17.7               | 1.0                 | 18.0               | 10.4                   | 35.7                  |
| ENSG00000197249 | SERPINA1      | -0.51               | -0.49              | 0.23                | -0.09              | 26.0                | 24.3               | 5.4                 | 0.9                | 31.3                   | 25.1                  |
| ENSG00000252666 | AD000090.1    | 0.02                | 0.50               | 0.18                | 0.21               | 0.1                 | 25.3               | 3.4                 | 4.4                | 3.4                    | 29.7                  |
| ENSG00000143546 | S100A8        | -0.27               | -0.39              | 0.07                | 0.38               | 7.4                 | 15.2               | 0.4                 | 14.4               | 7.9                    | 29.6                  |
| ENSG00000188906 | LRRK2         | 0.09                | -0.52              | -0.02               | 0.16               | 0.7                 | 26.9               | 0.1                 | 2.5                | 0.8                    | 29.4                  |
| ENSG00000177606 | JUN           | 0.32                | 0.33               | 0.43                | -0.24              | 10.1                | 11.2               | 18.6                | 5.7                | 28.8                   | 16.9                  |
| ENSG00000170954 | ZNF415        | 0.28                | 0.12               | -0.45               | 0.29               | 7.9                 | 1.5                | 20.0                | 8.5                | 27.8                   | 10.0                  |
| ENSG00000162747 | FCGR3B        | -0.25               | -0.45              | -0.25               | 0.24               | 6.3                 | 20.0               | 6.2                 | 5.9                | 12.5                   | 25.9                  |
| ENSG00000119535 | CSF3R         | -0.22               | -0.46              | 0.03                | 0.11               | 5.0                 | 21.0               | 0.1                 | 1.2                | 5.1                    | 22.1                  |
| ENSG00000103569 | AQP9          | 0.17                | -0.46              | -0.23               | 0.08               | 3.0                 | 20.8               | 5.1                 | 0.6                | 8.1                    | 21.4                  |
| ENSG00000251826 | AL365332.1    | -0.12               | 0.34               | 0.01                | 0.26               | 1.5                 | 11.8               | 0.0                 | 6.5                | 1.5                    | 18.3                  |
| ENSG00000244734 | HBB           | 0.24                | 0.40               | 0.03                | 0.10               | 5.6                 | 16.0               | 0.1                 | 1.1                | 5.7                    | 17.1                  |
| ENSG00000169429 | IL8           | -0.31               | -0.29              | 0.26                | 0.16               | 9.8                 | 8.3                | 6.7                 | 2.5                | 16.5                   | 10.8                  |
| ENSG00000240371 | RP11-624G17.1 | 0.01                | 0.25               | -0.01               | -0.10              | 0.0                 | 6.3                | 0.0                 | 1.1                | 0.0                    | 7.4                   |
| ENSG00000176788 | BASP1         | -0.03               | 0.18               | 0.07                | -0.04              | 0.1                 | 3.4                | 0.5                 | 0.1                | 0.6                    | 3.5                   |

**Table A154:** Canonical loadings and explained variance (RNA-Seq, T-cells, Day 3, Gene variables). Gene variables with at least 25% of explained variance for the first two canonical variates are listed. GX: canonical loadings for canonical variate X, VX: % explained variance for canonical variate X, V1+V2: total % explained variance for both canonical variates. Values for CCA results with a poor cross validation score (< 0.70) are left blank. Sorted by maximum explained variance across treatments (V1+V2).

| IMO Variable  | IMO Variable Name      | I1<br>(SV-<br>AS03) | I1<br>(SV-<br>PBS) | I2<br>(SV-<br>AS03) | I2<br>(SV-<br>PBS) | V1<br>(SV-<br>AS03) | V1<br>(SV-<br>PBS) | V2<br>(SV-<br>AS03) | V2<br>(SV-<br>PBS) | V1+V2<br>(SV-<br>AS03) | V1+V2<br>(SV-<br>PBS) |
|---------------|------------------------|---------------------|--------------------|---------------------|--------------------|---------------------|--------------------|---------------------|--------------------|------------------------|-----------------------|
| IL-12p70      | Interleukin-12 p70     | 0.98                | -0.91              | -0.17               | -0.21              | 96.7                | 83.7               | 2.8                 | 4.4                | 99.6                   | 88.1                  |
| IFN- $\gamma$ | Interferon gamma       | 0.31                | -0.54              | 0.20                | 0.79               | 9.8                 | 29.4               | 4.2                 | 62.8               | 14.0                   | 92.1                  |
| TNF           | Tumor necrosis factors | 0.91                | -0.54              | 0.06                | 0.76               | 82.9                | 28.9               | 0.3                 | 58.1               | 83.2                   | 87.1                  |
| IL-8          | Interleukin-8          | 0.65                | -0.42              | 0.65                | 0.76               | 41.8                | 17.3               | 42.5                | 57.4               | 84.3                   | 74.7                  |
| IL-1 $\beta$  | Interleukin-1 beta     | 0.59                | -0.55              | 0.70                | 0.70               | 35.0                | 29.9               | 49.1                | 49.1               | 84.1                   | 79.0                  |
| IL-10         | Interleukin-10         | 0.69                | -0.63              | 0.49                | 0.66               | 47.9                | 40.0               | 23.6                | 43.6               | 71.5                   | 83.6                  |
| IL-6          | Interleukin-6          | 0.46                | -0.30              | 0.29                | 0.79               | 20.8                | 9.3                | 8.3                 | 61.8               | 29.1                   | 71.1                  |

| IMO Variable   | IMO Variable Name                   | I1<br>(SV-<br>AS03) | I1<br>(SV-<br>PBS) | I2<br>(SV-<br>AS03) | I2<br>(SV-<br>PBS) | V1<br>(SV-<br>AS03) | V1<br>(SV-<br>PBS) | V2<br>(SV-<br>AS03) | V2<br>(SV-<br>PBS) | V1+V2<br>(SV-<br>AS03) | V1+V2<br>(SV-<br>PBS) |
|----------------|-------------------------------------|---------------------|--------------------|---------------------|--------------------|---------------------|--------------------|---------------------|--------------------|------------------------|-----------------------|
| MCP-1          | Monocyte chemoattractant protein-1  | -0.43               | 0.47               | 0.70                | 0.16               | 18.4                | 22.1               | 48.9                | 2.5                | 67.4                   | 24.6                  |
| MIP-1 $\alpha$ | Macrophage inflammatory protein     | 0.53                | 0.44               | 0.52                | 0.68               | 28.3                | 19.0               | 27.4                | 46.5               | 55.7                   | 65.5                  |
| Nt             | Microneutralization inhibition      | -0.41               | -0.29              | 0.40                | 0.70               | 17.1                | 8.5                | 15.8                | 48.4               | 32.9                   | 56.9                  |
| IP-10          | Interferon gamma-induced protein 10 | 0.60                | 0.41               | -0.24               | 0.47               | 36.4                | 16.5               | 5.7                 | 22.0               | 42.1                   | 38.5                  |
| Eotaxin-1      | Eotaxin-1                           | 0.35                | 0.27               | 0.51                | 0.14               | 12.5                | 7.4                | 25.6                | 2.1                | 38.1                   | 9.4                   |
| RANTES         | Chemokine (C-C motif) ligand 5      | 0.11                | 0.54               | 0.49                | -0.03              | 1.3                 | 28.7               | 24.5                | 0.1                | 25.7                   | 28.8                  |

**Table A155:** Canonical loadings and explained variance (RNA-Seq, T-cells, Day 3, IMO variables). IMO variables with at least 25% of explained variance for the first two canonical variates are listed. GX: canonical loadings for canonical variate X, VX: % explained variance for canonical variate X, V1+V2: total % explained variance for both canonical variates. Values for CCA results with a poor cross validation score (< 0.70) are left blank. Sorted by maximum explained variance across treatments (V1+V2).

| Gene ID         | Gene Name      | G1<br>(SV-<br>AS03) | G1<br>(SV-<br>PBS) | G2<br>(SV-<br>AS03) | G2<br>(SV-<br>PBS) | V1<br>(SV-<br>AS03) | V1<br>(SV-<br>PBS) | V2<br>(SV-<br>AS03) | V2<br>(SV-<br>PBS) | V1+V2<br>(SV-<br>AS03) | V1+V2<br>(SV-<br>PBS) |
|-----------------|----------------|---------------------|--------------------|---------------------|--------------------|---------------------|--------------------|---------------------|--------------------|------------------------|-----------------------|
| ENSG00000101057 | MYBL2          |                     | 0.29               |                     | 0.86               |                     | 8.6                |                     | 74.4               |                        | 82.9                  |
| ENSG00000208317 | SNORD78_208317 |                     | -0.12              |                     | 0.68               |                     | 1.4                |                     | 46.1               |                        | 47.5                  |
| ENSG00000168546 | GFRA2          |                     | -0.63              |                     | 0.24               |                     | 39.8               |                     | 5.7                |                        | 45.5                  |
| ENSG00000228696 | ARL17B         |                     | -0.15              |                     | 0.66               |                     | 2.4                |                     | 43.0               |                        | 45.4                  |
| ENSG00000197465 | GYPE           |                     | 0.61               |                     | -0.21              |                     | 37.3               |                     | 4.6                |                        | 41.9                  |
| ENSG00000244734 | HBB            |                     | -0.40              |                     | -0.45              |                     | 16.1               |                     | 19.8               |                        | 35.9                  |
| ENSG00000171051 | FPR1           |                     | -0.44              |                     | 0.35               |                     | 19.7               |                     | 12.2               |                        | 31.9                  |
| ENSG00000169429 | IL8            |                     | 0.16               |                     | -0.50              |                     | 2.4                |                     | 24.9               |                        | 27.3                  |
| ENSG00000243746 | EEF1A1P10      |                     | -0.15              |                     | -0.47              |                     | 2.2                |                     | 22.5               |                        | 24.8                  |
| ENSG00000038427 | VCAN           |                     | -0.20              |                     | -0.39              |                     | 4.2                |                     | 15.5               |                        | 19.7                  |
| ENSG00000188820 | FAM26F         |                     | 0.31               |                     | -0.14              |                     | 9.7                |                     | 1.9                |                        | 11.5                  |
| ENSG00000225217 | HSPA7          |                     | -0.19              |                     | 0.25               |                     | 3.6                |                     | 6.3                |                        | 9.9                   |
| ENSG00000221957 | KIR2DS4        |                     | -0.16              |                     | 0.13               |                     | 2.7                |                     | 1.6                |                        | 4.3                   |
| ENSG00000156453 | PCDH1          |                     | 0.00               |                     | 0.08               |                     | 0.0                |                     | 0.6                |                        | 0.6                   |
| ENSG00000171848 | RRM2           |                     | 0.02               |                     | -0.04              |                     | 0.1                |                     | 0.1                |                        | 0.2                   |

**Table A156:** Canonical loadings and explained variance (RNA-Seq, T-cells, Day 7, Gene variables). Gene variables with at least 25% of explained variance for the first two canonical variates are listed. GX: canonical loadings for canonical variate X, VX: % explained variance for canonical variate X, V1+V2: total % explained variance for both canonical variates. Values for CCA results with a poor cross validation score (< 0.70) are left blank. Sorted by maximum explained variance across treatments (V1+V2).

| IMO Variable   | IMO Variable Name                   | I1<br>(SV-<br>AS03) | I1<br>(SV-<br>PBS) | I2<br>(SV-<br>AS03) | I2<br>(SV-<br>PBS) | V1<br>(SV-<br>AS03) | V1<br>(SV-<br>PBS) | V2<br>(SV-<br>AS03) | V2<br>(SV-<br>PBS) | V1+V2<br>(SV-<br>AS03) | V1+V2<br>(SV-<br>PBS) |
|----------------|-------------------------------------|---------------------|--------------------|---------------------|--------------------|---------------------|--------------------|---------------------|--------------------|------------------------|-----------------------|
| MIP-1 $\alpha$ | Macrophage inflammatory protein     |                     | 0.97               |                     | -0.03              |                     | 94.8               |                     | 0.1                |                        | 94.9                  |
| IL-12p70       | Interleukin-12 p70                  |                     | -0.57              |                     | -0.75              |                     | 32.7               |                     | 55.6               |                        | 88.3                  |
| IP-10          | Interferon gamma-induced protein 10 |                     | 0.89               |                     | 0.01               |                     | 79.9               |                     | 0.0                |                        | 80.0                  |
| MCP-1          | Monocyte chemoattractant protein-1  |                     | 0.81               |                     | -0.12              |                     | 65.6               |                     | 1.5                |                        | 67.2                  |
| IL-1 $\beta$   | Interleukin-1 beta                  |                     | -0.76              |                     | 0.12               |                     | 57.5               |                     | 1.5                |                        | 59.0                  |
| Eotaxin-1      | Eotaxin-1                           |                     | -0.63              |                     | -0.35              |                     | 39.6               |                     | 12.0               |                        | 51.6                  |
| Nt             | Microneutralization inhibition      |                     | 0.61               |                     | -0.23              |                     | 37.5               |                     | 5.3                |                        | 42.8                  |
| TNF            | Tumor necrosis factors              |                     | -0.14              |                     | 0.57               |                     | 2.1                |                     | 32.1               |                        | 34.2                  |
| IFN- $\gamma$  | Interferon gamma                    |                     | -0.25              |                     | 0.42               |                     | 6.2                |                     | 18.1               |                        | 24.2                  |

| IMO Variable | IMO Variable Name              | I1<br>(SV-<br>AS03) | I1<br>(SV-<br>PBS) | I2<br>(SV-<br>AS03) | I2<br>(SV-<br>PBS) | V1<br>(SV-<br>AS03) | V1<br>(SV-<br>PBS) | V2<br>(SV-<br>AS03) | V2<br>(SV-<br>PBS) | V1+V2<br>(SV-<br>AS03) | V1+V2<br>(SV-<br>PBS) |
|--------------|--------------------------------|---------------------|--------------------|---------------------|--------------------|---------------------|--------------------|---------------------|--------------------|------------------------|-----------------------|
| IL-6         | Interleukin-6                  |                     | -0.28              |                     | 0.38               |                     | 7.6                |                     | 14.3               |                        | 21.9                  |
| IL-8         | Interleukin-8                  |                     | 0.21               |                     | 0.06               |                     | 4.3                |                     | 0.4                |                        | 4.7                   |
| IL-10        | Interleukin-10                 |                     | -0.08              |                     | 0.15               |                     | 0.7                |                     | 2.2                |                        | 2.9                   |
| RANTES       | Chemokine (C-C motif) ligand 5 |                     | -0.08              |                     | -0.02              |                     | 0.6                |                     | 0.0                |                        | 0.7                   |

**Table A157:** Canonical loadings and explained variance (RNA-Seq, T-cells, Day 7, IMO variables). IMO variables with at least 25% of explained variance for the first two canonical variates are listed. GX: canonical loadings for canonical variate X, VX: % explained variance for canonical variate X, V1+V2: total % explained variance for both canonical variates. Values for CCA results with a poor cross validation score (< 0.70) are left blank. Sorted by maximum explained variance across treatments (V1+V2).

| Gene ID         | Gene Name     | G1<br>(SV-<br>AS03) | G1<br>(SV-<br>PBS) | G2<br>(SV-<br>AS03) | G2<br>(SV-<br>PBS) | V1<br>(SV-<br>AS03) | V1<br>(SV-<br>PBS) | V2<br>(SV-<br>AS03) | V2<br>(SV-<br>PBS) | V1+V2<br>(SV-<br>AS03) | V1+V2<br>(SV-<br>PBS) |
|-----------------|---------------|---------------------|--------------------|---------------------|--------------------|---------------------|--------------------|---------------------|--------------------|------------------------|-----------------------|
| ENSG00000113721 | PDGFRB        |                     | 0.83               |                     | 0.09               |                     | 69.7               |                     | 0.8                |                        | 70.5                  |
| ENSG00000169429 | IL8           |                     | -0.21              |                     | -0.77              |                     | 4.2                |                     | 59.2               |                        | 63.4                  |
| ENSG00000112183 | RBM24         |                     | 0.57               |                     | -0.29              |                     | 32.0               |                     | 8.3                |                        | 40.3                  |
| ENSG00000252666 | AD000090.1    |                     | 0.62               |                     | -0.13              |                     | 38.7               |                     | 1.6                |                        | 40.3                  |
| ENSG00000173535 | TNFRSF10C     |                     | -0.16              |                     | -0.47              |                     | 2.7                |                     | 22.4               |                        | 25.1                  |
| ENSG00000232618 | RP11-439L18.1 |                     | -0.10              |                     | -0.44              |                     | 0.9                |                     | 19.5               |                        | 20.5                  |
| ENSG00000066336 | SPI1          |                     | -0.13              |                     | -0.42              |                     | 1.7                |                     | 18.0               |                        | 19.7                  |
| ENSG00000143776 | CDC42BPA      |                     | 0.25               |                     | 0.32               |                     | 6.3                |                     | 10.4               |                        | 16.8                  |
| ENSG00000162747 | FCGR3B        |                     | 0.01               |                     | 0.34               |                     | 0.0                |                     | 11.3               |                        | 11.3                  |
| ENSG00000182578 | CSF1R         |                     | -0.19              |                     | -0.25              |                     | 3.6                |                     | 6.3                |                        | 9.9                   |
| ENSG00000131042 | LILRB2        |                     | 0.10               |                     | -0.28              |                     | 0.9                |                     | 8.0                |                        | 8.9                   |
| ENSG00000129194 | SOX15         |                     | 0.01               |                     | -0.26              |                     | 0.0                |                     | 7.0                |                        | 7.0                   |
| ENSG00000197249 | SERPINA1      |                     | 0.04               |                     | -0.21              |                     | 0.2                |                     | 4.4                |                        | 4.6                   |
| ENSG00000244734 | HBB           |                     | 0.12               |                     | -0.18              |                     | 1.4                |                     | 3.1                |                        | 4.5                   |
| ENSG00000103569 | AQP9          |                     | 0.20               |                     | -0.01              |                     | 3.9                |                     | 0.0                |                        | 3.9                   |

**Table A158:** Canonical loadings and explained variance (RNA-Seq, T-cells, Day 28, Gene variables). Gene variables with at least 25% of explained variance for the first two canonical variates are listed. GX: canonical loadings for canonical variate X, VX: % explained variance for canonical variate X, V1+V2: total % explained variance for both canonical variates. Values for CCA results with a poor cross validation score (< 0.70) are left blank. Sorted by maximum explained variance across treatments (V1+V2).

| IMO Variable   | IMO Variable Name                   | I1<br>(SV-<br>AS03) | I1<br>(SV-<br>PBS) | I2<br>(SV-<br>AS03) | I2<br>(SV-<br>PBS) | V1<br>(SV-<br>AS03) | V1<br>(SV-<br>PBS) | V2<br>(SV-<br>AS03) | V2<br>(SV-<br>PBS) | V1+V2<br>(SV-<br>AS03) | V1+V2<br>(SV-<br>PBS) |
|----------------|-------------------------------------|---------------------|--------------------|---------------------|--------------------|---------------------|--------------------|---------------------|--------------------|------------------------|-----------------------|
| IL-12p70       | Interleukin-12 p70                  |                     | 0.93               |                     | -0.01              |                     | 86.4               |                     | 0.0                |                        | 86.4                  |
| MIP-1 $\alpha$ | Macrophage inflammatory protein     |                     | -0.28              |                     | -0.76              |                     | 8.1                |                     | 57.1               |                        | 65.2                  |
| IFN- $\gamma$  | Interferon gamma                    |                     | -0.34              |                     | 0.69               |                     | 11.7               |                     | 47.3               |                        | 59.0                  |
| TNF            | Tumor necrosis factors              |                     | -0.64              |                     | 0.32               |                     | 41.4               |                     | 10.2               |                        | 51.6                  |
| IL-6           | Interleukin-6                       |                     | -0.10              |                     | 0.68               |                     | 1.0                |                     | 46.5               |                        | 47.5                  |
| IL-1 $\beta$   | Interleukin-1 beta                  |                     | -0.20              |                     | 0.54               |                     | 4.0                |                     | 29.6               |                        | 33.5                  |
| MCP-1          | Monocyte chemoattractant protein-1  |                     | -0.52              |                     | 0.25               |                     | 26.6               |                     | 6.1                |                        | 32.7                  |
| IL-10          | Interleukin-10                      |                     | -0.39              |                     | 0.32               |                     | 15.5               |                     | 10.2               |                        | 25.7                  |
| IP-10          | Interferon gamma-induced protein 10 |                     | -0.43              |                     | -0.20              |                     | 18.7               |                     | 3.9                |                        | 22.6                  |
| RANTES         | Chemokine (C-C motif) ligand 5      |                     | -0.11              |                     | 0.46               |                     | 1.3                |                     | 20.9               |                        | 22.2                  |
| Nt             | Microneutralization inhibition      |                     | -0.36              |                     | -0.03              |                     | 12.8               |                     | 0.1                |                        | 12.9                  |

| IMO Variable | IMO Variable Name           | I1<br>(SV-<br>AS03) | I1<br>(SV-<br>PBS) | I2<br>(SV-<br>AS03) | I2<br>(SV-<br>PBS) | V1<br>(SV-<br>AS03) | V1<br>(SV-<br>PBS) | V2<br>(SV-<br>AS03) | V2<br>(SV-<br>PBS) | V1+V2<br>(SV-<br>AS03) | V1+V2<br>(SV-<br>PBS) |
|--------------|-----------------------------|---------------------|--------------------|---------------------|--------------------|---------------------|--------------------|---------------------|--------------------|------------------------|-----------------------|
| Eotaxin-1    | Eotaxin-1                   |                     | -0.09              |                     | 0.35               |                     | 0.8                |                     | 11.9               |                        | 12.8                  |
| IL-8         | Interleukin-8               |                     | 0.12               |                     | -0.24              |                     | 1.5                |                     | 5.7                |                        | 7.2                   |
| HAI          | Hemagglutination inhibition |                     | -0.02              |                     | 0.13               |                     | 0.1                |                     | 1.7                |                        | 1.7                   |

**Table A159:** Canonical loadings and explained variance (RNA-Seq, T-cells, Day 28, IMO variables). IMO variables with at least 25% of explained variance for the first two canonical variates are listed. GX: canonical loadings for canonical variate X, VX: % explained variance for canonical variate X, V1+V2: total % explained variance for both canonical variates. Values for CCA results with a poor cross validation score (< 0.70) are left blank. Sorted by maximum explained variance across treatments (V1+V2).



| Cell Type       | N [Pos, Neg] | Input<br>Gene<br>Variables | Selected<br>Gene<br>Variables | Mean<br>Misclassification<br>Error | SDEG [%] | Opt. $\lambda$ | Intercept |
|-----------------|--------------|----------------------------|-------------------------------|------------------------------------|----------|----------------|-----------|
| B-cells         | 9, 10        | 44                         | 24                            | 0.05                               | 33       | 0.0478         | -2.2502   |
| Dendritic cells | 9, 11        | 252                        | 16                            | 0.10                               | 94       | 0.6123         | -0.6088   |
| Monocytes       | 9, 11        | 494                        | 32                            | 0.15                               | 88       | 0.4517         | -0.9111   |
| Neutrophils     | 9, 11        | 869                        | 26                            | 0.05                               | 85       | 0.5335         | -0.9094   |
| NK-cells        | 9, 11        | 122                        | 9                             | 0.10                               | 67       | 0.5097         | -0.7060   |
| T-cells         | 9, 10        | 68                         | 14                            | 0.05                               | 86       | 0.4449         | -0.7319   |

**Table A160:** Regularized seroprotection logistic regression model summary statistics (RNA-Seq, Day 1). N Pos.: subjects with HAI  $\geq$  1:40, N Neg.: subjects with HAI < 1:40, SDEG [%]: percent overlap between selected genes (HAI pos. vs. neg.) and differentially expressed genes (SV-AS03 vs. SV-PBS).

| Cell Type       | Day | Median Fold Change (SV-AS03) | Median Fold Change (SV-PBS) | Median Fold Change (SV-AS03/SV-PBS) |
|-----------------|-----|------------------------------|-----------------------------|-------------------------------------|
| B-cells         | 1   | 0.68                         | 0.95                        | 0.71                                |
| B-cells         | 3   | 1.13                         | 1.02                        | 1.11                                |
| B-cells         | 7   | 0.94                         | 0.95                        | 0.99                                |
| B-cells         | 28  | 0.74                         | 1.04                        | 0.71                                |
| Dendritic cells | 1   | 0.66                         | 0.99                        | 0.67                                |
| Dendritic cells | 3   | 1.43                         | 1.03                        | 1.38                                |
| Dendritic cells | 7   | 0.86                         | 1.06                        | 0.81                                |
| Dendritic cells | 28  | 0.76                         | 0.97                        | 0.79                                |
| Monocytes       | 1   | 1                            | 0.93                        | 1.07                                |
| Monocytes       | 3   | 1.21                         | 0.98                        | 1.23                                |
| Monocytes       | 7   | 0.82                         | 0.93                        | 0.89                                |
| Monocytes       | 28  | 0.79                         | 0.95                        | 0.83                                |
| Neutrophils     | 1   | 1.22                         | 0.97                        | 1.25                                |
| Neutrophils     | 3   | 0.92                         | 0.94                        | 0.98                                |
| Neutrophils     | 7   | 0.97                         | 1.05                        | 0.92                                |
| Neutrophils     | 28  | 0.94                         | 0.92                        | 1.02                                |
| NK-cells        | 1   | 0.51                         | 1.03                        | 0.49                                |
| NK-cells        | 3   | 1.22                         | 1.08                        | 1.12                                |
| NK-cells        | 7   | 1                            | 0.99                        | 1.01                                |
| NK-cells        | 28  | 0.79                         | 0.87                        | 0.91                                |
| T-cells         | 1   | 0.57                         | 0.98                        | 0.58                                |
| T-cells         | 3   | 1.15                         | 1.11                        | 1.03                                |
| T-cells         | 7   | 1                            | 0.9                         | 1.12                                |
| T-cells         | 28  | 0.99                         | 1.01                        | 0.99                                |

**Table A161:** Median fold change in the percentage of live cells by immune cell type and treatment group.

| Cell Type       | Day | Median<br>Change<br>(SV-AS03) | Fold | Median<br>Change<br>(SV-PBS) | Fold | Median<br>Change<br>(SV-AS03/SV-<br>PBS) | Fold |
|-----------------|-----|-------------------------------|------|------------------------------|------|------------------------------------------|------|
| B-cells         | 1   | 0.89                          |      | 1.2                          |      | 0.74                                     |      |
| B-cells         | 3   | 0.91                          |      | 1.1                          |      | 0.83                                     |      |
| B-cells         | 7   | 0.85                          |      | 1.14                         |      | 0.74                                     |      |
| B-cells         | 28  | 0.7                           |      | 0.83                         |      | 0.85                                     |      |
| Dendritic cells | 1   | 0.7                           |      | 1.17                         |      | 0.6                                      |      |
| Dendritic cells | 3   | 1.26                          |      | 1.17                         |      | 1.07                                     |      |
| Dendritic cells | 7   | 0.74                          |      | 1.26                         |      | 0.59                                     |      |
| Dendritic cells | 28  | 0.75                          |      | 0.87                         |      | 0.86                                     |      |
| Monocytes       | 1   | 1.26                          |      | 1.04                         |      | 1.21                                     |      |
| Monocytes       | 3   | 1.11                          |      | 0.9                          |      | 1.23                                     |      |
| Monocytes       | 7   | 0.75                          |      | 1.1                          |      | 0.68                                     |      |
| Monocytes       | 28  | 0.66                          |      | 0.75                         |      | 0.89                                     |      |
| Neutrophils     | 1   | 1.41                          |      | 1.14                         |      | 1.23                                     |      |
| Neutrophils     | 3   | 0.79                          |      | 0.88                         |      | 0.89                                     |      |
| Neutrophils     | 7   | 0.9                           |      | 1.2                          |      | 0.75                                     |      |
| Neutrophils     | 28  | 1                             |      | 0.72                         |      | 1.39                                     |      |
| NK-cells        | 1   | 0.56                          |      | 1.31                         |      | 0.42                                     |      |
| NK-cells        | 3   | 0.97                          |      | 1.01                         |      | 0.96                                     |      |
| NK-cells        | 7   | 0.93                          |      | 1.14                         |      | 0.81                                     |      |
| NK-cells        | 28  | 0.64                          |      | 0.76                         |      | 0.84                                     |      |
| T-cells         | 1   | 0.67                          |      | 0.97                         |      | 0.69                                     |      |
| T-cells         | 3   | 0.97                          |      | 1.09                         |      | 0.89                                     |      |
| T-cells         | 7   | 1.01                          |      | 0.97                         |      | 1.04                                     |      |
| T-cells         | 28  | 0.87                          |      | 0.95                         |      | 0.92                                     |      |

**Table A162:** Median fold change in the number of live cells per mL by immune cell type and treatment group.

| Subject ID | Study Visit Day | Missing Values                                  | Experimental Comment                                             |
|------------|-----------------|-------------------------------------------------|------------------------------------------------------------------|
| 83FVD001   | Day -14         | Missing values for all celltypes and markers    | FACS machine down; no activation samples collected               |
| 83FVD011   | Day 0           | Missing values for NK-cells and dendritic cells | Missed CD11c & CD56 Abs in FMO stains (no FMO data for NK/mDC)   |
| 83FVD015   | Day 0           | Missing values for T-cells                      | Missing CD3 in APC-cy7 FMO stain                                 |
| 83FVD015   | Day 28          | Missing values for all celltypes and markers    | Out of window visit. No activation staining                      |
| 83FVD016   | Day 0           | Missing values for T-cells                      | Missing CD3 in APC-cy7 FMO stain                                 |
| 83FVD018   | Day 3           | Missing values for all celltypes and markers    | FACS machine down. No end of day activation staining             |
| 83FVD019   | Day -14         | Missing values for all celltypes and markers    | FACS machine down. No activation staining (phen from sort stain) |
| 83FVD019   | Day 3           | Missing values for all celltypes and markers    | PBMC EXPOSED TO BLEACH (WB and PMN ok). No FMO staining          |
| 83FVD020   | Day -14         | Missing values for all celltypes and markers    | FACS machine down. No activation staining (phen from sort stain) |
| 83FVD022   | Day 28          | Missing CD86 values for all 6 cell types        | PerCP detector up; missing PerCP FMO                             |
| 83FVD023   | Day 1           | Missing values for all celltypes and markers    | Lost samples. No stains.                                         |

**Table A163:** Samples with incomplete cell activation measures (FACS).

| Subject ID | Study Visit Day | Observations | Markers     | Cell Type       | Experimental Comment                                                                                                                                                                                 |
|------------|-----------------|--------------|-------------|-----------------|------------------------------------------------------------------------------------------------------------------------------------------------------------------------------------------------------|
| 83FVD002   | Day 1           | 12           | CD134, CD86 | All             | No difference in expression of activation markers between all FMO samples and the "cocktail" sample. High background in FMO samples suggests that all FMO samples may have actually gotten antibody. |
| 83FVD003   | Day 1           | 6            | CD134       | All             | No difference in expression of activation markers between all FMO samples and the "cocktail" sample. High background in FMO samples suggests that all FMO samples may have actually gotten antibody. |
| 83FVD011   | Day 28          | 6            | CD134       | All             | No difference in expression of CD134 between FMO and "cocktail" sample. High background in CD134 FMO suggests that this FMO may have actually gotten antibody.                                       |
| 83FVD015   | Day -28         | 1            | CD69        | Dendritic cells | Very few CD11c+ (mDC) at any time point w/this subject                                                                                                                                               |
| 83FVD015   | Day -14         | 1            | CD69        | Dendritic cells | Very few CD11c+ (mDC) at any time point w/this subject                                                                                                                                               |
| 83FVD015   | Day 0           | 1            | CD69        | Dendritic cells | Very few CD11c+ (mDC) at any time point w/this subject                                                                                                                                               |
| 83FVD015   | Day 1           | 1            | CD69        | Dendritic cells | Very few CD11c+ (mDC) at any time point w/this subject                                                                                                                                               |
| 83FVD015   | Day 3           | 1            | CD69        | Dendritic cells | Very few CD11c+ (mDC) at any time point w/this subject                                                                                                                                               |
| 83FVD015   | Day 7           | 1            | CD69        | Dendritic cells | Very few CD11c+ (mDC) at any time point w/this subject                                                                                                                                               |
| 83FVD015   | Day 7           | 1            | CD134       | NK-cells        |                                                                                                                                                                                                      |
| 83FVD017   | Day -14         | 1            | CD86        | Neutrophils     | The position of the CD15 population looked off, suggesting that machine compensation on that day was not optimal for the CD15 marker.                                                                |
| 83FVD017   | Day 7           | 1            | CD69        | Neutrophils     |                                                                                                                                                                                                      |
| 83FVD017   | Day 0           | 1            | CD86        | B-cells         |                                                                                                                                                                                                      |
| 83FVD012   | Day -28         | 1            | CD86        | B-cells         |                                                                                                                                                                                                      |

**Table A164:** Outlying cell activation samples (FACS).

| Package Name | Version  | Package Name    | Version  | Package Name | Version |
|--------------|----------|-----------------|----------|--------------|---------|
| bitops       | 1.0-6    | RGCCA           | 2.0      | foreach      | 1.4.1   |
| caTools      | 1.16     | rgl             | 0.93.996 | Matrix       | 1.1-2   |
| chron        | 2.3-45   | R.methodsS3     | 1.6.1    | plyr         | 1.8.1   |
| codetools    | 0.2-8    | R.oo            | 1.18.0   | mixOmics     | 5.0-3   |
| digest       | 0.6.4    | R.utils         | 1.29.8   | gtools       | 3.3.0   |
| evaluate     | 0.5.1    | stats4          | 3.0.1    | vegan        | 2.0-10  |
| formatR      | 0.10     | stringr         | 0.6.2    | lattice      | 0.20-27 |
| gdata        | 2.13.2   | tools           | 3.0.1    | permute      | 0.8-3   |
| grid         | 3.0.1    | coin            | 1.0-23   | gplots       | 2.12.1  |
| igraph       | 0.7.1    | survival        | 2.37-7   | MASS         | 7.3-29  |
| iterators    | 1.0.6    | impute          | 1.34.0   | car          | 2.0-19  |
| KernSmooth   | 2.23-10  | sqldf           | 0.4-7    | png          | 0.1-7   |
| modeltools   | 0.2-21   | RSQLite.extfuns | 0.0.1    | edgeR        | 3.2.4   |
| mvtnorm      | 0.9-9997 | RSQLite         | 0.11.4   | limma        | 3.16.8  |
| nnet         | 7.3-7    | DBI             | 0.2-7    | xtable       | 1.7-1   |
| pheatmap     | 0.7.7    | gsubfn          | 0.6-5    | knitr        | 1.5     |
| RColorBrewer | 1.0-5    | proto           | 0.3-10   |              |         |
| Rcpp         | 0.11.0   | glmnet          | 2.0-2    |              |         |

**Table A165:** List of R packages and versions used for the analyses presented in this report. R version 3.0.1 (2013-05-16) 'Good Sport' run on Ubuntu (release 13.04, x86-64-pc-linux-gnu (64-bit) platform).

## References

Robinson, Mark D., and Alicia Oshlack. "A scaling normalization method for differential expression analysis of RNA-seq data." *Genome Biol* 11.3 (2010): R25.

McCarthy, Davis J., Yunshun Chen, and Gordon K. Smyth. "Differential expression analysis of multifactor RNA-Seq experiments with respect to biological variation." *Nucleic acids research* (2012): gks042.

Young, Matthew D., et al. "Method Gene ontology analysis for RNA-seq: accounting for selection bias." *Genome Biol* 11 (2010): R14
