# Supplementary material for: Cell-Based Systems Biology Analysis of Human AS03-Adjuvanted H5N1 Avian Influenza Vaccine Responses: A Phase I Randomized Controlled Trial
Source: PLoS One. 2017 Jan 18;12(1):e0167488. doi: 10.1371/journal.pone.0167488 (PMC5242433; doi:10.1371/journal.pone.0167488)
Supplement: S5 Table — Gene sets are sorted by FDR and Jaccard similarity index. (XLSX) [file pone.0167488.s006.xlsx]

## Sheet: Overview
S5 supplemental tables - Significantly enriched Reactome pathways
Dendritic cells, Monocytes and Neutrophils Day 1
B-cells Day 1
Dendritic cells Day 1
Monocytes Day 1
Neutrophils Day 1
Neutrophils Day 3
NK-cells Day 1
NK-cells Day 3
NK-cells Day 28
T-cells Day 1

## Sheet: s5_dnc_mnc_neu_d1_sdeg
Category ID	Category Genes #	Any-reg. SDEG #	Any-reg. SDEG %	Up-reg. SDEG #	Up-reg. SDEG %	Down-reg. SDEG #	Down-reg. SDEG %	Jaccard similarity coefficient	P	FDR	Link
INTERFERON ALPHA BETA SIGNALING	62	13	21	13	21	0	0	0.1512	<0.0001	0.0006	http://www.broadinstitute.org/gsea/msigdb/cards/REACTOME_INTERFERON_ALPHA_BETA_SIGNALING
INTERFERON GAMMA SIGNALING	59	11	18.6	11	18.6	0	0	0.1294	<0.0001	0.0006	http://www.broadinstitute.org/gsea/msigdb/cards/REACTOME_INTERFERON_GAMMA_SIGNALING
INTERFERON SIGNALING	153	21	13.7	21	13.7	0	0	0.1243	<0.0001	0.0006	http://www.broadinstitute.org/gsea/msigdb/cards/REACTOME_INTERFERON_SIGNALING
CYTOKINE SIGNALING IN IMMUNE SYSTEM	258	21	8.1	21	8.1	0	0	0.0766	<0.0001	0.0006	http://www.broadinstitute.org/gsea/msigdb/cards/REACTOME_CYTOKINE_SIGNALING_IN_IMMUNE_SYSTEM
NEGATIVE REGULATORS OF RIG I MDA5 SIGNALING	29	4	13.8	4	13.8	0	0	0.0645	<0.0001	0.0006	http://www.broadinstitute.org/gsea/msigdb/cards/REACTOME_NEGATIVE_REGULATORS_OF_RIG_I_MDA5_SIGNALING
RIG I MDA5 MEDIATED INDUCTION OF IFN ALPHA BETA PATHWAYS	70	6	8.6	6	8.6	0	0	0.0594	<0.0001	0.0006	http://www.broadinstitute.org/gsea/msigdb/cards/REACTOME_RIG_I_MDA5_MEDIATED_INDUCTION_OF_IFN_ALPHA_BETA_PATHWAYS
ANTIGEN PROCESSING CROSS PRESENTATION	72	6	8.3	6	8.3	0	0	0.0583	<0.0001	0.0006	http://www.broadinstitute.org/gsea/msigdb/cards/REACTOME_ANTIGEN_PROCESSING_CROSS_PRESENTATION
ANTIVIRAL MECHANISM BY IFN STIMULATED GENES	65	5	7.7	5	7.7	0	0	0.0515	<0.0001	0.0006	http://www.broadinstitute.org/gsea/msigdb/cards/REACTOME_ANTIVIRAL_MECHANISM_BY_IFN_STIMULATED_GENES
IMMUNE SYSTEM	871	31	3.6	31	3.6	0	0	0.0353	<0.0001	0.0006	http://www.broadinstitute.org/gsea/msigdb/cards/REACTOME_IMMUNE_SYSTEM
CLASS I MHC MEDIATED ANTIGEN PROCESSING PRESENTATION	228	9	3.9	9	3.9	0	0	0.0352	<0.0001	0.0006	http://www.broadinstitute.org/gsea/msigdb/cards/REACTOME_CLASS_I_MHC_MEDIATED_ANTIGEN_PROCESSING_PRESENTATION
INNATE IMMUNE SYSTEM	263	8	3	8	3	0	0	0.0274	<0.0001	0.0006	http://www.broadinstitute.org/gsea/msigdb/cards/REACTOME_INNATE_IMMUNE_SYSTEM
ADAPTIVE IMMUNE SYSTEM	495	11	2.2	11	2.2	0	0	0.0211	<0.0001	0.0006	http://www.broadinstitute.org/gsea/msigdb/cards/REACTOME_ADAPTIVE_IMMUNE_SYSTEM
CROSS PRESENTATION OF SOLUBLE EXOGENOUS ANTIGENS ENDOSOMES	48	4	8.3	4	8.3	0	0	0.0494	<0.0001	0.001	http://www.broadinstitute.org/gsea/msigdb/cards/REACTOME_CROSS_PRESENTATION_OF_SOLUBLE_EXOGENOUS_ANTIGENS_ENDOSOMES
ER PHAGOSOME PATHWAY	59	4	6.8	4	6.8	0	0	0.0435	<0.0001	0.0014	http://www.broadinstitute.org/gsea/msigdb/cards/REACTOME_ER_PHAGOSOME_PATHWAY
ANTIGEN PROCESSING UBIQUITINATION PROTEASOME DEGRADATION	192	5	2.6	5	2.6	0	0	0.0223	<0.0001	0.0027	http://www.broadinstitute.org/gsea/msigdb/cards/REACTOME_ANTIGEN_PROCESSING_UBIQUITINATION_PROTEASOME_DEGRADATION

## Sheet: s5_bcl_d1_sdeg
Category ID	Category Genes #	Any-reg. SDEG #	Any-reg. SDEG %	Up-reg. SDEG #	Up-reg. SDEG %	Down-reg. SDEG #	Down-reg. SDEG %	Jaccard similarity coefficient	P	FDR	Link
INTERFERON GAMMA SIGNALING	59	6	10.2	6	10.2	0	0	0.0984	<0.0001	0.0013	http://www.broadinstitute.org/gsea/msigdb/cards/REACTOME_INTERFERON_GAMMA_SIGNALING
INTERFERON SIGNALING	153	7	4.6	7	4.6	0	0	0.0455	<0.0001	0.0013	http://www.broadinstitute.org/gsea/msigdb/cards/REACTOME_INTERFERON_SIGNALING
INTERFERON ALPHA BETA SIGNALING	62	3	4.8	3	4.8	0	0	0.0448	<0.0001	0.0013	http://www.broadinstitute.org/gsea/msigdb/cards/REACTOME_INTERFERON_ALPHA_BETA_SIGNALING
CYTOKINE SIGNALING IN IMMUNE SYSTEM	258	7	2.7	7	2.7	0	0	0.027	<0.0001	0.0013	http://www.broadinstitute.org/gsea/msigdb/cards/REACTOME_CYTOKINE_SIGNALING_IN_IMMUNE_SYSTEM
IMMUNE SYSTEM	871	8	0.9	8	0.9	0	0	0.0092	<0.0001	0.0013	http://www.broadinstitute.org/gsea/msigdb/cards/REACTOME_IMMUNE_SYSTEM

## Sheet: s5_dnc_d1_sdeg
Category ID	Category Genes #	Any-reg. SDEG #	Any-reg. SDEG %	Up-reg. SDEG #	Up-reg. SDEG %	Down-reg. SDEG #	Down-reg. SDEG %	Jaccard similarity coefficient	P	FDR	Link
INTERFERON ALPHA BETA SIGNALING	62	16	25.8	16	25.8	0	0	0.127	<0.0001	0.0006	http://www.broadinstitute.org/gsea/msigdb/cards/REACTOME_INTERFERON_ALPHA_BETA_SIGNALING
INTERFERON SIGNALING	153	25	16.3	25	16.3	0	0	0.1202	<0.0001	0.0006	http://www.broadinstitute.org/gsea/msigdb/cards/REACTOME_INTERFERON_SIGNALING
INTERFERON GAMMA SIGNALING	59	12	20.3	12	20.3	0	0	0.0945	<0.0001	0.0006	http://www.broadinstitute.org/gsea/msigdb/cards/REACTOME_INTERFERON_GAMMA_SIGNALING
CYTOKINE SIGNALING IN IMMUNE SYSTEM	258	29	11.2	26	10.1	3	1.2	0.0939	<0.0001	0.0006	http://www.broadinstitute.org/gsea/msigdb/cards/REACTOME_CYTOKINE_SIGNALING_IN_IMMUNE_SYSTEM
IMMUNE SYSTEM	871	46	5.3	43	4.9	3	0.3	0.0508	<0.0001	0.0006	http://www.broadinstitute.org/gsea/msigdb/cards/REACTOME_IMMUNE_SYSTEM
ANTIVIRAL MECHANISM BY IFN STIMULATED GENES	65	7	10.8	7	10.8	0	0	0.0507	<0.0001	0.0006	http://www.broadinstitute.org/gsea/msigdb/cards/REACTOME_ANTIVIRAL_MECHANISM_BY_IFN_STIMULATED_GENES
INITIAL TRIGGERING OF COMPLEMENT	13	4	30.8	4	30.8	0	0	0.0449	<0.0001	0.0006	http://www.broadinstitute.org/gsea/msigdb/cards/REACTOME_INITIAL_TRIGGERING_OF_COMPLEMENT
RIG I MDA5 MEDIATED INDUCTION OF IFN ALPHA BETA PATHWAYS	70	6	8.6	6	8.6	0	0	0.0417	<0.0001	0.0006	http://www.broadinstitute.org/gsea/msigdb/cards/REACTOME_RIG_I_MDA5_MEDIATED_INDUCTION_OF_IFN_ALPHA_BETA_PATHWAYS
ANTIGEN PROCESSING CROSS PRESENTATION	72	6	8.3	6	8.3	0	0	0.0411	<0.0001	0.0006	http://www.broadinstitute.org/gsea/msigdb/cards/REACTOME_ANTIGEN_PROCESSING_CROSS_PRESENTATION
INNATE IMMUNE SYSTEM	263	13	4.9	12	4.6	1	0.4	0.0394	<0.0001	0.0006	http://www.broadinstitute.org/gsea/msigdb/cards/REACTOME_INNATE_IMMUNE_SYSTEM
CLASS I MHC MEDIATED ANTIGEN PROCESSING PRESENTATION	228	11	4.8	11	4.8	0	0	0.037	<0.0001	0.0006	http://www.broadinstitute.org/gsea/msigdb/cards/REACTOME_CLASS_I_MHC_MEDIATED_ANTIGEN_PROCESSING_PRESENTATION
ADAPTIVE IMMUNE SYSTEM	495	16	3.2	16	3.2	0	0	0.0286	<0.0001	0.0006	http://www.broadinstitute.org/gsea/msigdb/cards/REACTOME_ADAPTIVE_IMMUNE_SYSTEM
NEGATIVE REGULATORS OF RIG I MDA5 SIGNALING	29	4	13.8	4	13.8	0	0	0.0381	<0.0001	0.001	http://www.broadinstitute.org/gsea/msigdb/cards/REACTOME_NEGATIVE_REGULATORS_OF_RIG_I_MDA5_SIGNALING
COMPLEMENT CASCADE	29	4	13.8	4	13.8	0	0	0.0381	<0.0001	0.0014	http://www.broadinstitute.org/gsea/msigdb/cards/REACTOME_COMPLEMENT_CASCADE
SIGNALING BY ILS	101	6	5.9	3	3	3	3	0.0343	<0.0001	0.0031	http://www.broadinstitute.org/gsea/msigdb/cards/REACTOME_SIGNALING_BY_ILS
IL1 SIGNALING	37	4	10.8	1	2.7	3	8.1	0.0354	0.0002	0.0083	http://www.broadinstitute.org/gsea/msigdb/cards/REACTOME_IL1_SIGNALING
CROSS PRESENTATION OF SOLUBLE EXOGENOUS ANTIGENS ENDOSOMES	48	4	8.3	4	8.3	0	0	0.0323	0.0002	0.0083	http://www.broadinstitute.org/gsea/msigdb/cards/REACTOME_CROSS_PRESENTATION_OF_SOLUBLE_EXOGENOUS_ANTIGENS_ENDOSOMES

## Sheet: s5_mnc_d1_sdeg
Category ID	Category Genes #	Any-reg. SDEG #	Any-reg. SDEG %	Up-reg. SDEG #	Up-reg. SDEG %	Down-reg. SDEG #	Down-reg. SDEG %	Jaccard similarity coefficient	P	FDR	Link
INTERFERON SIGNALING	153	29	19	29	19	0	0	0.1111	<0.0001	0.0008	http://www.broadinstitute.org/gsea/msigdb/cards/REACTOME_INTERFERON_SIGNALING
INTERFERON ALPHA BETA SIGNALING	62	19	30.6	19	30.6	0	0	0.1056	<0.0001	0.0008	http://www.broadinstitute.org/gsea/msigdb/cards/REACTOME_INTERFERON_ALPHA_BETA_SIGNALING
INTERFERON GAMMA SIGNALING	59	16	27.1	16	27.1	0	0	0.0889	<0.0001	0.0008	http://www.broadinstitute.org/gsea/msigdb/cards/REACTOME_INTERFERON_GAMMA_SIGNALING
CYTOKINE SIGNALING IN IMMUNE SYSTEM	258	32	12.4	31	12	1	0.4	0.0882	<0.0001	0.0008	http://www.broadinstitute.org/gsea/msigdb/cards/REACTOME_CYTOKINE_SIGNALING_IN_IMMUNE_SYSTEM
IMMUNE SYSTEM	871	56	6.4	50	5.7	6	0.7	0.0588	<0.0001	0.0008	http://www.broadinstitute.org/gsea/msigdb/cards/REACTOME_IMMUNE_SYSTEM
ADAPTIVE IMMUNE SYSTEM	495	23	4.6	19	3.8	4	0.8	0.0378	<0.0001	0.0008	http://www.broadinstitute.org/gsea/msigdb/cards/REACTOME_ADAPTIVE_IMMUNE_SYSTEM
INNATE IMMUNE SYSTEM	263	14	5.3	12	4.6	2	0.8	0.0363	<0.0001	0.0008	http://www.broadinstitute.org/gsea/msigdb/cards/REACTOME_INNATE_IMMUNE_SYSTEM
BMAL1 CLOCK NPAS2 ACTIVATES CIRCADIAN EXPRESSION	35	6	17.1	3	8.6	3	8.6	0.0361	<0.0001	0.0008	http://www.broadinstitute.org/gsea/msigdb/cards/REACTOME_BMAL1_CLOCK_NPAS2_ACTIVATES_CIRCADIAN_EXPRESSION
CIRCADIAN CLOCK	51	7	13.7	4	7.8	3	5.9	0.0387	<0.0001	0.0015	http://www.broadinstitute.org/gsea/msigdb/cards/REACTOME_CIRCADIAN_CLOCK
CLASS I MHC MEDIATED ANTIGEN PROCESSING PRESENTATION	228	12	5.3	12	5.3	0	0	0.034	<0.0001	0.0047	http://www.broadinstitute.org/gsea/msigdb/cards/REACTOME_CLASS_I_MHC_MEDIATED_ANTIGEN_PROCESSING_PRESENTATION
IMMUNOREGULATORY INTERACTIONS BETWEEN A LYMPHOID AND A NON LYMPHOID CELL	62	6	9.7	4	6.5	2	3.2	0.0311	0.0001	0.0067	http://www.broadinstitute.org/gsea/msigdb/cards/REACTOME_IMMUNOREGULATORY_INTERACTIONS_BETWEEN_A_LYMPHOID_AND_A_NON_LYMPHOID_CELL
ANTIGEN PROCESSING CROSS PRESENTATION	72	6	8.3	6	8.3	0	0	0.0296	0.0001	0.0067	http://www.broadinstitute.org/gsea/msigdb/cards/REACTOME_ANTIGEN_PROCESSING_CROSS_PRESENTATION

## Sheet: s5_neu_d1_sdeg
Category ID	Category Genes #	Any-reg. SDEG #	Any-reg. SDEG %	Up-reg. SDEG #	Up-reg. SDEG %	Down-reg. SDEG #	Down-reg. SDEG %	Jaccard similarity coefficient	P	FDR	Link
INTERFERON SIGNALING	153	41	26.8	41	26.8	0	0	0.1395	<0.0001	0.0005	http://www.broadinstitute.org/gsea/msigdb/cards/REACTOME_INTERFERON_SIGNALING
CYTOKINE SIGNALING IN IMMUNE SYSTEM	258	47	18.2	46	17.8	1	0.4	0.1196	<0.0001	0.0005	http://www.broadinstitute.org/gsea/msigdb/cards/REACTOME_CYTOKINE_SIGNALING_IN_IMMUNE_SYSTEM
INTERFERON ALPHA BETA SIGNALING	62	23	37.1	23	37.1	0	0	0.1041	<0.0001	0.0005	http://www.broadinstitute.org/gsea/msigdb/cards/REACTOME_INTERFERON_ALPHA_BETA_SIGNALING
INTERFERON GAMMA SIGNALING	59	22	37.3	22	37.3	0	0	0.1005	<0.0001	0.0005	http://www.broadinstitute.org/gsea/msigdb/cards/REACTOME_INTERFERON_GAMMA_SIGNALING
IMMUNE SYSTEM	871	80	9.2	77	8.8	3	0.3	0.0822	<0.0001	0.0005	http://www.broadinstitute.org/gsea/msigdb/cards/REACTOME_IMMUNE_SYSTEM
ADAPTIVE IMMUNE SYSTEM	495	34	6.9	33	6.7	1	0.2	0.0529	<0.0001	0.0005	http://www.broadinstitute.org/gsea/msigdb/cards/REACTOME_ADAPTIVE_IMMUNE_SYSTEM
INNATE IMMUNE SYSTEM	263	20	7.6	18	6.8	2	0.8	0.0471	<0.0001	0.0005	http://www.broadinstitute.org/gsea/msigdb/cards/REACTOME_INNATE_IMMUNE_SYSTEM
CLASS I MHC MEDIATED ANTIGEN PROCESSING PRESENTATION	228	17	7.5	16	7	1	0.4	0.0433	<0.0001	0.0005	http://www.broadinstitute.org/gsea/msigdb/cards/REACTOME_CLASS_I_MHC_MEDIATED_ANTIGEN_PROCESSING_PRESENTATION
ANTIVIRAL MECHANISM BY IFN STIMULATED GENES	65	10	15.4	10	15.4	0	0	0.0422	<0.0001	0.0005	http://www.broadinstitute.org/gsea/msigdb/cards/REACTOME_ANTIVIRAL_MECHANISM_BY_IFN_STIMULATED_GENES
RIG I MDA5 MEDIATED INDUCTION OF IFN ALPHA BETA PATHWAYS	70	10	14.3	9	12.9	1	1.4	0.0413	<0.0001	0.0005	http://www.broadinstitute.org/gsea/msigdb/cards/REACTOME_RIG_I_MDA5_MEDIATED_INDUCTION_OF_IFN_ALPHA_BETA_PATHWAYS
NEGATIVE REGULATORS OF RIG I MDA5 SIGNALING	29	7	24.1	6	20.7	1	3.4	0.0343	<0.0001	0.0005	http://www.broadinstitute.org/gsea/msigdb/cards/REACTOME_NEGATIVE_REGULATORS_OF_RIG_I_MDA5_SIGNALING
JNK C JUN KINASES PHOSPHORYLATION AND ACTIVATION MEDIATED BY ACTIVATED HUMAN TAK1	13	5	38.5	4	30.8	1	7.7	0.0263	<0.0001	0.0005	http://www.broadinstitute.org/gsea/msigdb/cards/REACTOME_JNK_C_JUN_KINASES_PHOSPHORYLATION_AND_ACTIVATION_MEDIATED_BY_ACTIVATED_HUMAN_TAK1
ACTIVATED TAK1 MEDIATES P38 MAPK ACTIVATION	14	5	35.7	4	28.6	1	7.1	0.0262	<0.0001	0.0005	http://www.broadinstitute.org/gsea/msigdb/cards/REACTOME_ACTIVATED_TAK1_MEDIATES_P38_MAPK_ACTIVATION
ANTIGEN PROCESSING CROSS PRESENTATION	72	9	12.5	9	12.5	0	0	0.0367	<0.0001	0.001	http://www.broadinstitute.org/gsea/msigdb/cards/REACTOME_ANTIGEN_PROCESSING_CROSS_PRESENTATION
CROSS PRESENTATION OF SOLUBLE EXOGENOUS ANTIGENS ENDOSOMES	48	7	14.6	7	14.6	0	0	0.0314	<0.0001	0.0013	http://www.broadinstitute.org/gsea/msigdb/cards/REACTOME_CROSS_PRESENTATION_OF_SOLUBLE_EXOGENOUS_ANTIGENS_ENDOSOMES
TAK1 ACTIVATES NFKB BY PHOSPHORYLATION AND ACTIVATION OF IKKS COMPLEX	20	5	25	4	20	1	5	0.0254	<0.0001	0.0013	http://www.broadinstitute.org/gsea/msigdb/cards/REACTOME_TAK1_ACTIVATES_NFKB_BY_PHOSPHORYLATION_AND_ACTIVATION_OF_IKKS_COMPLEX
ER PHAGOSOME PATHWAY	59	7	11.9	7	11.9	0	0	0.0299	<0.0001	0.0016	http://www.broadinstitute.org/gsea/msigdb/cards/REACTOME_ER_PHAGOSOME_PATHWAY
ANTIGEN PROCESSING UBIQUITINATION PROTEASOME DEGRADATION	192	13	6.8	12	6.2	1	0.5	0.036	<0.0001	0.0022	http://www.broadinstitute.org/gsea/msigdb/cards/REACTOME_ANTIGEN_PROCESSING_UBIQUITINATION_PROTEASOME_DEGRADATION
VIF MEDIATED DEGRADATION OF APOBEC3G	50	6	12	6	12	0	0	0.0265	<0.0001	0.0035	http://www.broadinstitute.org/gsea/msigdb/cards/REACTOME_VIF_MEDIATED_DEGRADATION_OF_APOBEC3G
MHC CLASS II ANTIGEN PRESENTATION	87	8	9.2	8	9.2	0	0	0.0307	0.0002	0.0064	http://www.broadinstitute.org/gsea/msigdb/cards/REACTOME_MHC_CLASS_II_ANTIGEN_PRESENTATION
NUCLEOTIDE BINDING DOMAIN LEUCINE RICH REPEAT CONTAINING RECEPTOR NLR SIGNALING PATHWAYS	43	6	14	5	11.6	1	2.3	0.0274	0.0002	0.0064	http://www.broadinstitute.org/gsea/msigdb/cards/REACTOME_NUCLEOTIDE_BINDING_DOMAIN_LEUCINE_RICH_REPEAT_CONTAINING_RECEPTOR_NLR_SIGNALING_PATHWAYS
NOD1 2 SIGNALING PATHWAY	28	5	17.9	4	14.3	1	3.6	0.0244	0.0002	0.007	http://www.broadinstitute.org/gsea/msigdb/cards/REACTOME_NOD1_2_SIGNALING_PATHWAY
PD1 SIGNALING	17	4	23.5	4	23.5	0	0	0.0205	0.0002	0.007	http://www.broadinstitute.org/gsea/msigdb/cards/REACTOME_PD1_SIGNALING
TRIF MEDIATED TLR3 SIGNALING	67	7	10.4	6	9	1	1.5	0.0289	0.0003	0.0076	http://www.broadinstitute.org/gsea/msigdb/cards/REACTOME_TRIF_MEDIATED_TLR3_SIGNALING

## Sheet: s5_neu_d3_sdeg
Category ID	Category Genes #	Any-reg. SDEG #	Any-reg. SDEG %	Up-reg. SDEG #	Up-reg. SDEG %	Down-reg. SDEG #	Down-reg. SDEG %	Jaccard similarity coefficient	P	FDR	Link
INTERFERON ALPHA BETA SIGNALING	62	14	22.6	14	22.6	0	0	0.1573	<0.0001	0.0011	http://www.broadinstitute.org/gsea/msigdb/cards/REACTOME_INTERFERON_ALPHA_BETA_SIGNALING
INTERFERON SIGNALING	153	22	14.4	22	14.4	0	0	0.1279	<0.0001	0.0011	http://www.broadinstitute.org/gsea/msigdb/cards/REACTOME_INTERFERON_SIGNALING
INTERFERON GAMMA SIGNALING	59	10	16.9	10	16.9	0	0	0.1111	<0.0001	0.0011	http://www.broadinstitute.org/gsea/msigdb/cards/REACTOME_INTERFERON_GAMMA_SIGNALING
CYTOKINE SIGNALING IN IMMUNE SYSTEM	258	22	8.5	22	8.5	0	0	0.0794	<0.0001	0.0011	http://www.broadinstitute.org/gsea/msigdb/cards/REACTOME_CYTOKINE_SIGNALING_IN_IMMUNE_SYSTEM
ANTIVIRAL MECHANISM BY IFN STIMULATED GENES	65	6	9.2	6	9.2	0	0	0.06	<0.0001	0.0011	http://www.broadinstitute.org/gsea/msigdb/cards/REACTOME_ANTIVIRAL_MECHANISM_BY_IFN_STIMULATED_GENES
IMMUNE SYSTEM	871	28	3.2	28	3.2	0	0	0.0317	<0.0001	0.0011	http://www.broadinstitute.org/gsea/msigdb/cards/REACTOME_IMMUNE_SYSTEM

## Sheet: s5_nkc_d1_sdeg
Category ID	Category Genes #	Any-reg. SDEG #	Any-reg. SDEG %	Up-reg. SDEG #	Up-reg. SDEG %	Down-reg. SDEG #	Down-reg. SDEG %	Jaccard similarity coefficient	P	FDR	Link
INTERFERON GAMMA SIGNALING	59	4	6.8	4	6.8	0	0	0.0625	<0.0001	0.0017	http://www.broadinstitute.org/gsea/msigdb/cards/REACTOME_INTERFERON_GAMMA_SIGNALING
INTERFERON ALPHA BETA SIGNALING	62	4	6.5	4	6.5	0	0	0.0597	<0.0001	0.0017	http://www.broadinstitute.org/gsea/msigdb/cards/REACTOME_INTERFERON_ALPHA_BETA_SIGNALING
INTERFERON SIGNALING	153	5	3.3	5	3.3	0	0	0.0318	<0.0001	0.0017	http://www.broadinstitute.org/gsea/msigdb/cards/REACTOME_INTERFERON_SIGNALING
CYTOKINE SIGNALING IN IMMUNE SYSTEM	258	5	1.9	5	1.9	0	0	0.0191	<0.0001	0.0017	http://www.broadinstitute.org/gsea/msigdb/cards/REACTOME_CYTOKINE_SIGNALING_IN_IMMUNE_SYSTEM

## Sheet: s5_nkc_d3_sdeg
Category ID	Category Genes #	Any-reg. SDEG #	Any-reg. SDEG %	Up-reg. SDEG #	Up-reg. SDEG %	Down-reg. SDEG #	Down-reg. SDEG %	Jaccard similarity coefficient	P	FDR	Link
G1 S SPECIFIC TRANSCRIPTION	16	6	37.5	6	37.5	0	0	0.1395	<0.0001	0.0003	http://www.broadinstitute.org/gsea/msigdb/cards/REACTOME_G1_S_SPECIFIC_TRANSCRIPTION
G0 AND EARLY G1	22	6	27.3	6	27.3	0	0	0.1224	<0.0001	0.0003	http://www.broadinstitute.org/gsea/msigdb/cards/REACTOME_G0_AND_EARLY_G1
KINESINS	24	6	25	6	25	0	0	0.1176	<0.0001	0.0003	http://www.broadinstitute.org/gsea/msigdb/cards/REACTOME_KINESINS
MITOTIC PROMETAPHASE	82	12	14.6	12	14.6	0	0	0.1165	<0.0001	0.0003	http://www.broadinstitute.org/gsea/msigdb/cards/REACTOME_MITOTIC_PROMETAPHASE
E2F MEDIATED REGULATION OF DNA REPLICATION	31	6	19.4	6	19.4	0	0	0.1034	<0.0001	0.0003	http://www.broadinstitute.org/gsea/msigdb/cards/REACTOME_E2F_MEDIATED_REGULATION_OF_DNA_REPLICATION
MITOTIC M M G1 PHASES	163	18	11	18	11	0	0	0.1011	<0.0001	0.0003	http://www.broadinstitute.org/gsea/msigdb/cards/REACTOME_MITOTIC_M_M_G1_PHASES
DNA REPLICATION	183	19	10.4	19	10.4	0	0	0.0964	<0.0001	0.0003	http://www.broadinstitute.org/gsea/msigdb/cards/REACTOME_DNA_REPLICATION
CYCLIN A B1 ASSOCIATED EVENTS DURING G2 M TRANSITION	15	4	26.7	4	26.7	0	0	0.0909	<0.0001	0.0003	http://www.broadinstitute.org/gsea/msigdb/cards/REACTOME_CYCLIN_A_B1_ASSOCIATED_EVENTS_DURING_G2_M_TRANSITION
CELL CYCLE MITOTIC	299	27	9	27	9	0	0	0.0885	<0.0001	0.0003	http://www.broadinstitute.org/gsea/msigdb/cards/REACTOME_CELL_CYCLE_MITOTIC
MITOTIC G1 G1 S PHASES	127	12	9.4	12	9.4	0	0	0.0811	<0.0001	0.0003	http://www.broadinstitute.org/gsea/msigdb/cards/REACTOME_MITOTIC_G1_G1_S_PHASES
G1 S TRANSITION	104	10	9.6	10	9.6	0	0	0.0787	<0.0001	0.0003	http://www.broadinstitute.org/gsea/msigdb/cards/REACTOME_G1_S_TRANSITION
CELL CYCLE	389	28	7.2	28	7.2	0	0	0.0711	<0.0001	0.0003	http://www.broadinstitute.org/gsea/msigdb/cards/REACTOME_CELL_CYCLE
INHIBITION OF THE PROTEOLYTIC ACTIVITY OF APC C REQUIRED FOR THE ONSET OF ANAPHASE BY MITOTIC SPINDLE CHECKPOINT COMPONENTS	18	3	16.7	3	16.7	0	0	0.0625	<0.0001	0.0003	http://www.broadinstitute.org/gsea/msigdb/cards/REACTOME_INHIBITION_OF_THE_PROTEOLYTIC_ACTIVITY_OF_APC_C_REQUIRED_FOR_THE_ONSET_OF_ANAPHASE_BY_MITOTIC_SPINDLE_CHECKPOINT_COMPONENTS
APC C CDC20 MEDIATED DEGRADATION OF CYCLIN B	19	3	15.8	3	15.8	0	0	0.0612	<0.0001	0.0003	http://www.broadinstitute.org/gsea/msigdb/cards/REACTOME_APC_C_CDC20_MEDIATED_DEGRADATION_OF_CYCLIN_B
APC CDC20 MEDIATED DEGRADATION OF NEK2A	21	3	14.3	3	14.3	0	0	0.0588	<0.0001	0.0003	http://www.broadinstitute.org/gsea/msigdb/cards/REACTOME_APC_CDC20_MEDIATED_DEGRADATION_OF_NEK2A
CELL CYCLE CHECKPOINTS	113	8	7.1	8	7.1	0	0	0.058	<0.0001	0.0003	http://www.broadinstitute.org/gsea/msigdb/cards/REACTOME_CELL_CYCLE_CHECKPOINTS
REGULATION OF MITOTIC CELL CYCLE	78	6	7.7	6	7.7	0	0	0.0571	<0.0001	0.0003	http://www.broadinstitute.org/gsea/msigdb/cards/REACTOME_REGULATION_OF_MITOTIC_CELL_CYCLE
G2 M CHECKPOINTS	42	4	9.5	4	9.5	0	0	0.0563	<0.0001	0.0003	http://www.broadinstitute.org/gsea/msigdb/cards/REACTOME_G2_M_CHECKPOINTS
MITOTIC G2 G2 M PHASES	76	5	6.6	5	6.6	0	0	0.0481	<0.0001	0.0003	http://www.broadinstitute.org/gsea/msigdb/cards/REACTOME_MITOTIC_G2_G2_M_PHASES
MHC CLASS II ANTIGEN PRESENTATION	87	5	5.7	5	5.7	0	0	0.0435	<0.0001	0.0003	http://www.broadinstitute.org/gsea/msigdb/cards/REACTOME_MHC_CLASS_II_ANTIGEN_PRESENTATION
CYCLIN E ASSOCIATED EVENTS DURING G1 S TRANSITION	63	4	6.3	4	6.3	0	0	0.0435	<0.0001	0.0003	http://www.broadinstitute.org/gsea/msigdb/cards/REACTOME_CYCLIN_E_ASSOCIATED_EVENTS_DURING_G1_S_TRANSITION_
FACTORS INVOLVED IN MEGAKARYOCYTE DEVELOPMENT AND PLATELET PRODUCTION	126	6	4.8	6	4.8	0	0	0.0392	<0.0001	0.0003	http://www.broadinstitute.org/gsea/msigdb/cards/REACTOME_FACTORS_INVOLVED_IN_MEGAKARYOCYTE_DEVELOPMENT_AND_PLATELET_PRODUCTION
M G1 TRANSITION	77	4	5.2	4	5.2	0	0	0.0377	<0.0001	0.0003	http://www.broadinstitute.org/gsea/msigdb/cards/REACTOME_M_G1_TRANSITION
APC C CDC20 MEDIATED DEGRADATION OF MITOTIC PROTEINS	66	4	6.1	4	6.1	0	0	0.0421	<0.0001	0.0006	http://www.broadinstitute.org/gsea/msigdb/cards/REACTOME_APC_C_CDC20_MEDIATED_DEGRADATION_OF_MITOTIC_PROTEINS
DEPOSITION OF NEW CENPA CONTAINING NUCLEOSOMES AT THE CENTROMERE	60	3	5	3	5	0	0	0.0333	<0.0001	0.0019	http://www.broadinstitute.org/gsea/msigdb/cards/REACTOME_DEPOSITION_OF_NEW_CENPA_CONTAINING_NUCLEOSOMES_AT_THE_CENTROMERE
S PHASE	106	4	3.8	4	3.8	0	0	0.0296	<0.0001	0.0021	http://www.broadinstitute.org/gsea/msigdb/cards/REACTOME_S_PHASE
ADAPTIVE IMMUNE SYSTEM	495	7	1.4	7	1.4	0	0	0.0134	<0.0001	0.0025	http://www.broadinstitute.org/gsea/msigdb/cards/REACTOME_ADAPTIVE_IMMUNE_SYSTEM
ACTIVATION OF ATR IN RESPONSE TO REPLICATION STRESS	36	3	8.3	3	8.3	0	0	0.0455	0.0001	0.0029	http://www.broadinstitute.org/gsea/msigdb/cards/REACTOME_ACTIVATION_OF_ATR_IN_RESPONSE_TO_REPLICATION_STRESS
E2F ENABLED INHIBITION OF PRE REPLICATION COMPLEX FORMATION	10	2	20	2	20	0	0	0.0488	0.0002	0.0049	http://www.broadinstitute.org/gsea/msigdb/cards/REACTOME_E2F_ENABLED_INHIBITION_OF_PRE_REPLICATION_COMPLEX_FORMATION
APC C CDH1 MEDIATED DEGRADATION OF CDC20 AND OTHER APC C CDH1 TARGETED PROTEINS IN LATE MITOSIS EARLY G1	65	3	4.6	3	4.6	0	0	0.0316	0.0002	0.0054	http://www.broadinstitute.org/gsea/msigdb/cards/REACTOME_APC_C_CDH1_MEDIATED_DEGRADATION_OF_CDC20_AND_OTHER_APC_C_CDH1_TARGETED_PROTEINS_IN_LATE_MITOSIS_EARLY_G1
ASSEMBLY OF THE PRE REPLICATIVE COMPLEX	64	3	4.7	3	4.7	0	0	0.0319	0.0003	0.0057	http://www.broadinstitute.org/gsea/msigdb/cards/REACTOME_ASSEMBLY_OF_THE_PRE_REPLICATIVE_COMPLEX
CDC6 ASSOCIATION WITH THE ORC ORIGIN COMPLEX	11	2	18.2	2	18.2	0	0	0.0476	0.0003	0.0063	http://www.broadinstitute.org/gsea/msigdb/cards/REACTOME_CDC6_ASSOCIATION_WITH_THE_ORC_ORIGIN_COMPLEX
METABOLISM OF NUCLEOTIDES	71	3	4.2	3	4.2	0	0	0.0297	0.0003	0.0065	http://www.broadinstitute.org/gsea/msigdb/cards/REACTOME_METABOLISM_OF_NUCLEOTIDES
ASSOCIATION OF LICENSING FACTORS WITH THE PRE REPLICATIVE COMPLEX	13	2	15.4	2	15.4	0	0	0.0455	0.0004	0.0077	http://www.broadinstitute.org/gsea/msigdb/cards/REACTOME_ASSOCIATION_OF_LICENSING_FACTORS_WITH_THE_PRE_REPLICATIVE_COMPLEX
CONVERSION FROM APC C CDC20 TO APC C CDH1 IN LATE ANAPHASE	16	2	12.5	2	12.5	0	0	0.0426	0.0004	0.0081	http://www.broadinstitute.org/gsea/msigdb/cards/REACTOME_CONVERSION_FROM_APC_C_CDC20_TO_APC_C_CDH1_IN_LATE_ANAPHASE
PHOSPHORYLATION OF THE APC C	17	2	11.8	2	11.8	0	0	0.0417	0.0005	0.0086	http://www.broadinstitute.org/gsea/msigdb/cards/REACTOME_PHOSPHORYLATION_OF_THE_APC_C
HEMOSTASIS	440	6	1.4	6	1.4	0	0	0.0128	0.0005	0.0086	http://www.broadinstitute.org/gsea/msigdb/cards/REACTOME_HEMOSTASIS

## Sheet: s5_nkc_d28_sdeg
Category ID	Category Genes #	Any-reg. SDEG #	Any-reg. SDEG %	Up-reg. SDEG #	Up-reg. SDEG %	Down-reg. SDEG #	Down-reg. SDEG %	Jaccard similarity coefficient	P	FDR	Link
INTERFERON GAMMA SIGNALING	59	4	6.8	0	0	4	6.8	0.0494	<0.0001	0.0034	http://www.broadinstitute.org/gsea/msigdb/cards/REACTOME_INTERFERON_GAMMA_SIGNALING
IMMUNE SYSTEM	871	10	1.1	0	0	10	1.1	0.0113	<0.0001	0.0034	http://www.broadinstitute.org/gsea/msigdb/cards/REACTOME_IMMUNE_SYSTEM
MHC CLASS II ANTIGEN PRESENTATION	87	4	4.6	0	0	4	4.6	0.0367	<0.0001	0.0067	http://www.broadinstitute.org/gsea/msigdb/cards/REACTOME_MHC_CLASS_II_ANTIGEN_PRESENTATION

[truncated: 1 more sheets: s53_tcl_d1_sdeg]
